# Supplementary material for: Integrative multi-omics analysis of growth plate regulation underlying body size in miniature pigs
Source: Research Square preprint supplement (doi:10.21203/rs.3.rs-7865536/v1), 2025-12-01
Supplement: Supplementary file 1 [file 0c2569692941a2f6477617a6.xlsx]

## Sheet: Common DEGs
Supplementary Data 5. Differentially expressed genes (DEGs) in the minipigs of interest. Common DEGs above the significance threshold of absolute Log2FoldChange (|l2fc|) of 2 and a p-value < 0.05 as well as human ortholog names are given . In addition, DEGs resulting from contrasts of one of the miniature breeds, Aachen minipig (AM) or Mini-LEWE (ML), against one large breed Mangalitza (MA) or An…
ENSEMBL_ID	Chromosome	Gene_start(bp)	Gene_end(bp)	Gene_name	AMAS_L2FC	AMAS_pValue	AMMA_L2FC	AMMA_pValue	MLMA_L2FC	MLMA_pValue	MLAS_L2FC	MLAS_pValue	Human ortholog name
ENSSSCG00000005439	1	249883311	249884630	ACTL7A	-16.8346	0.000516347	-20.901	8.53629e-05	-32.7408	8.48102e-14	-28.6744	4.67021e-12	ACTL7A
ENSSSCG00000018080	MT	8959	9162	ATP8	-7.33855	0.0245165	-9.17286	0.0105054	-10.4146	0.000438642	-8.58027	0.00212795	MT-ATP8
ENSSSCG00000007123	17	30422754	30427579	ENSSSCG00000007123	-20.3193	2.66633e-05	-19.1376	0.000354404	-33.3709	3.62859e-14	-34.5525	7.08422e-17	CST5
ENSSSCG00000040404	9	3522175	3523170	ENSSSCG00000040404	-19.8917	3.8461e-05	-19.4122	0.000274327	-33.5301	2.40738e-14	-34.0095	2.10529e-16	OR56B4
ENSSSCG00000047459	1	114236421	114241200	ENSSSCG00000047459	13.7415	0.00491736	13.929	0.00940487	20.2894	3.9228e-06	20.102	1.20712e-06
ENSSSCG00000048542	5	88984225	88989269	ENSSSCG00000048542	-18.7378	0.000114667	-13.6665	0.0104631	-29.4352	2.13435e-11	-34.5065	6.85545e-17	L1TD1
ENSSSCG00000055080	3	2747898	2751387	ENSSSCG00000055080	-21.4319	9.00465e-06	-26.581	5.25807e-07	-39.4541	1.48011e-19	-34.305	1.15291e-16
ENSSSCG00000055284	1	236160340	236163643	ENSSSCG00000055284	-20.3455	2.60379e-05	-19.1699	0.000346365	-33.3933	3.48955e-14	-34.5689	6.85366e-17
ENSSSCG00000055426	3	94256735	94259761	ENSSSCG00000055426	-19.3135	6.58752e-05	-23.567	9.10704e-06	-39.1061	4.06712e-19	-34.8526	4.07342e-17
ENSSSCG00000055822	5	49273637	49279817	ENSSSCG00000055822	-16.6143	0.000638154	-22.13	3.06904e-05	-34.7447	1.68469e-15	-29.2289	1.96776e-12
ENSSSCG00000056158	9	87410076	87416683	ENSSSCG00000056158	-16.5119	0.000694602	-19.9329	0.000174311	-32.1262	1.50177e-13	-28.7052	4.86092e-12
ENSSSCG00000056190	9	51583260	51586319	ENSSSCG00000056190	13.1534	0.00718845	11.6887	0.0295274	18.4692	2.64705e-05	19.9339	1.47111e-06	OR8B3
ENSSSCG00000057001	13	132195268	132198633	ENSSSCG00000057001	-16.1369	0.000924409	-30	2.20574e-08	-42.9961	1.08923e-22	-29.1331	2.2885e-12
ENSSSCG00000057553	1	66223781	66229259	ENSSSCG00000057553	13.8589	0.00457399	13.3926	0.0125603	19.1625	1.31465e-05	19.6288	2.16579e-06
ENSSSCG00000057707	14	120854459	120857764	ENSSSCG00000057707	11.8298	0.0151794	16.2348	0.00240826	-13.7652	0.00169546	-18.1702	1.09123e-05
ENSSSCG00000060629	15	70394192	70399838	ENSSSCG00000060629	-19.9071	3.79341e-05	-19.4297	0.000270849	-33.3268	3.4415e-14	-33.8042	3.17964e-16
ENSSSCG00000061429	5	49427379	49429468	ENSSSCG00000061429	-19.026	8.59167e-05	-18.499	0.00055676	-30.7499	2.97475e-12	-31.2769	4.3675e-14
ENSSSCG00000061617	6	144338166	144341086	ENSSSCG00000061617	-16.9844	0.000458312	-21.3483	5.97652e-05	-32.1249	2.39748e-13	-27.761	2.14551e-11
ENSSSCG00000063142	12	17854613	17857795	ENSSSCG00000063142	13.2032	0.00695883	13.2674	0.0134782	20.0495	5.07796e-06	19.9853	1.3811e-06
ENSSSCG00000027609	8	68326299	68360262	GC	-20.3455	2.60379e-05	-19.1699	0.000346365	-33.3933	3.48955e-14	-34.5689	6.85366e-17	GC
ENSSSCG00000021401	17	32040235	32046105	GFRA4	15.7955	0.00116596	15.0304	0.00489584	17.3605	7.83345e-05	18.1256	1.19862e-05	GFRA4
ENSSSCG00000013148	2	12319599	12337475	GLYATL2	-3.59818	0.0220317	-3.72687	0.0310059	-3.44651	0.0169135	-3.31781	0.0147121	GLYATL2
ENSSSCG00000001879	7	57935610	57938958	ODF3L1	14.3869	0.00317822	13.9769	0.009043	20.3337	3.73592e-06	20.7436	5.45868e-07	CIMAP1C
ENSSSCG00000021619	9	1936953	1951889	OVCH2	18.6487	0.00012208	13.219	0.0132457	15.4494	0.000439059	20.8791	4.52679e-07	OVCH2
ENSSSCG00000004732	1	129201069	129217008	PLA2G4F	-16.0816	0.000958715	-22.4308	2.37394e-05	-34.0718	5.17813e-15	-27.7225	2.52989e-11	PLA2G4F

## Sheet: DEGs in AMvsAS & AMvsMA
Ensembl_ID	Chromosome	Gene start (bp)	Gene end (bp)	Gene name	L2FC_AMAS	pvalue_AMAS	L2FC_AMMA	pvalue_AMMA	Human ortholog name
ENSSSCG00000022473	13	78923681	78932504	A4GNT	-13.5545	0.00128734	-19.1685	2.98138e-05	A4GNT
ENSSSCG00000005439	1	249883311	249884630	ACTL7A	-16.8346	0.000516347	-20.901	8.53629e-05	ACTL7A
ENSSSCG00000025294	13	207148401	207158532	AIRE	-3.26631	0.0118131	-4.41518	0.00144781	AIRE
ENSSSCG00000018080	MT	8959	9162	ATP8	-7.33855	0.0245165	-9.17286	0.0105054	MT-ATP8
ENSSSCG00000025072	3	37346532	37365357	C16orf89	-17.294	0.000370072	-19.9439	0.000184248	C16orf89
ENSSSCG00000007192	17	34082705	34086154	C20orf202	-14.4665	0.00318557	-17.8301	0.000895535	C20orf202
ENSSSCG00000006336	4	87559992	87568370	CCDC190	-15.321	7.65316e-09	-17.3136	8.28682e-10	CCDC190
ENSSSCG00000002642	6	636377	652165	CDH15	-16.5309	2.66137e-06	-14.8766	0.00013748	CDH15
ENSSSCG00000011666	13	80789195	81450657	CLSTN2	2.01723	0.0242005	2.11756	0.0314094	CLSTN2
ENSSSCG00000004869	1	149521510	149562623	CNDP1	-2.48376	0.044882	-2.73541	0.0439955	CNDP1
ENSSSCG00000035938	5	75945871	75980496	DBX2	-2.63243	0.0183305	-3.48472	0.00428394	DBX2
ENSSSCG00000003277	6	59203788	59211506	ENSSSCG00000003277	-15.0122	9.21783e-06	-15.1643	4.06184e-05	PYDC2
ENSSSCG00000007123	17	30422754	30427579	ENSSSCG00000007123	-20.3193	2.66633e-05	-19.1376	0.000354404	CST5
ENSSSCG00000017324	AEMK02000439.1	19765	53018	ENSSSCG00000017324	3.27049	0.0045906	2.72145	0.0291908	LRRC37A
ENSSSCG00000030262	12	35481245	35528092	ENSSSCG00000030262	4.4236	0.0448275	5.07211	0.0370425	GDPD1
ENSSSCG00000030709	3	8906591	8909350	ENSSSCG00000030709	-5.18425	0.0173031	-5.74945	0.0172165
ENSSSCG00000031563	4	1366920	1373335	ENSSSCG00000031563	3.75747	0.00665445	4.71431	0.0020678
ENSSSCG00000032197	2	9053101	9055162	ENSSSCG00000032197	3.19952	0.0496318	3.69149	0.0401191	GNG3
ENSSSCG00000038889	3	39067212	39072617	ENSSSCG00000038889	-13.7809	6.47728e-05	-14.5492	0.000107028
ENSSSCG00000039855	AEMK02000682.1	1853516	1855299	ENSSSCG00000039855	-2.7545	0.0386748	-3.21444	0.0247922	LCN9
ENSSSCG00000039995	15	38000421	38005703	ENSSSCG00000039995	-15.6204	0.000906005	-15.4249	0.00278256	DEFB104A
ENSSSCG00000040404	9	3522175	3523170	ENSSSCG00000040404	-19.8917	3.8461e-05	-19.4122	0.000274327	OR56B4
ENSSSCG00000041169	3	31461709	31469293	ENSSSCG00000041169	-16.6641	0.000608766	-20.6831	0.000101928
ENSSSCG00000041760	9	81832170	81837646	ENSSSCG00000041760	-13.4215	0.00606419	-20.9761	7.88639e-05
ENSSSCG00000042172	X	38633252	38903577	ENSSSCG00000042172	-18.0061	0.000189031	-23.7076	7.55701e-06
ENSSSCG00000043563	1	180477274	180479254	ENSSSCG00000043563	3.76602	0.00734532	3.26334	0.0288545
ENSSSCG00000046304	11	20631366	20633932	ENSSSCG00000046304	-17.656	4.90255e-05	-20.3119	1.9142e-05
ENSSSCG00000046941	2	96362816	96367580	ENSSSCG00000046941	-18.7684	9.40578e-18	-18.6105	1.84676e-14
ENSSSCG00000047459	1	114236421	114241200	ENSSSCG00000047459	13.7415	0.00491736	13.929	0.00940487
ENSSSCG00000047574	16	63957757	63966646	ENSSSCG00000047574	-16.1903	3.94787e-06	-12.4723	0.00135837
ENSSSCG00000048200	4	75750579	75761382	ENSSSCG00000048200	-4.8488	0.00729314	-4.95778	0.0126897
ENSSSCG00000048418	1	255835482	255839458	ENSSSCG00000048418	-16.7908	0.000563351	-14.836	0.00578671
ENSSSCG00000048542	5	88984225	88989269	ENSSSCG00000048542	-18.7378	0.000114667	-13.6665	0.0104631	L1TD1
ENSSSCG00000051023	13	206063945	206071041	ENSSSCG00000051023	-13.4281	0.000141795	-15.8796	3.47107e-05
ENSSSCG00000051549	18	54590825	54601022	ENSSSCG00000051549	-2.31845	0.00875526	-3.21118	0.000884096
ENSSSCG00000051980	10	50584955	50587210	ENSSSCG00000051980	-4.19445	0.0153492	-4.48638	0.0191897
ENSSSCG00000052224	13	96961352	96971567	ENSSSCG00000052224	-17.5853	7.25851e-07	-15.5072	7.99354e-05
ENSSSCG00000052401	9	136093596	136098541	ENSSSCG00000052401	11.7994	0.0156505	29.6598	3.37955e-08
ENSSSCG00000052454	5	22022010	22025316	ENSSSCG00000052454	2.53069	0.00172993	2.3403	0.00855966
ENSSSCG00000052756	13	43437732	43443214	ENSSSCG00000052756	-3.19031	0.0120746	-3.28072	0.0180195
ENSSSCG00000053247	9	56474832	56477274	ENSSSCG00000053247	4.08826	0.0134453	5.74606	0.00148399
ENSSSCG00000053430	4	8973601	8978648	ENSSSCG00000053430	3.66335	0.013399	3.57028	0.030021
ENSSSCG00000053573	12	17866293	17906324	ENSSSCG00000053573	3.46313	0.00519315	3.70006	0.0067428	LRRC37A
ENSSSCG00000054381	3	131633720	131638892	ENSSSCG00000054381	29.8508	1.11763e-09	13.0095	0.0152846
ENSSSCG00000055080	3	2747898	2751387	ENSSSCG00000055080	-21.4319	9.00465e-06	-26.581	5.25807e-07
ENSSSCG00000055143	17	31433069	31439142	ENSSSCG00000055143	-16.6414	0.000631683	-14.602	0.00660711
ENSSSCG00000055284	1	236160340	236163643	ENSSSCG00000055284	-20.3455	2.60379e-05	-19.1699	0.000346365
ENSSSCG00000055426	3	94256735	94259761	ENSSSCG00000055426	-19.3135	6.58752e-05	-23.567	9.10704e-06
ENSSSCG00000055822	5	49273637	49279817	ENSSSCG00000055822	-16.6143	0.000638154	-22.13	3.06904e-05
ENSSSCG00000056158	9	87410076	87416683	ENSSSCG00000056158	-16.5119	0.000694602	-19.9329	0.000174311
ENSSSCG00000056190	9	51583260	51586319	ENSSSCG00000056190	13.1534	0.00718845	11.6887	0.0295274	OR8B3
ENSSSCG00000056992	15	53958270	53961357	ENSSSCG00000056992	2.94648	0.0139704	2.85965	0.0283518
ENSSSCG00000057001	13	132195268	132198633	ENSSSCG00000057001	-16.1369	0.000924409	-30	2.20574e-08
ENSSSCG00000057553	1	66223781	66229259	ENSSSCG00000057553	13.8589	0.00457399	13.3926	0.0125603
ENSSSCG00000057707	14	120854459	120857764	ENSSSCG00000057707	11.8298	0.0151794	16.2348	0.00240826
ENSSSCG00000057767	14	131487780	131551184	ENSSSCG00000057767	-16.1018	0.000163467	-12.6846	0.0071871
ENSSSCG00000059223	17	51912775	51921746	ENSSSCG00000059223	-5.24148	0.00329941	-4.58753	0.0194526
ENSSSCG00000059637	1	131233142	131236343	ENSSSCG00000059637	-15.3811	1.33646e-05	-17.4585	5.01225e-06
ENSSSCG00000060629	15	70394192	70399838	ENSSSCG00000060629	-19.9071	3.79341e-05	-19.4297	0.000270849
ENSSSCG00000061429	5	49427379	49429468	ENSSSCG00000061429	-19.026	8.59167e-05	-18.499	0.00055676
ENSSSCG00000061547	8	138638388	138641514	ENSSSCG00000061547	-18.984	8.74162e-05	-15.5744	0.00368399
ENSSSCG00000061570	4	84567315	84574368	ENSSSCG00000061570	-2.27021	0.0407528	-2.8223	0.0176851
ENSSSCG00000061617	6	144338166	144341086	ENSSSCG00000061617	-16.9844	0.000458312	-21.3483	5.97652e-05
ENSSSCG00000061716	11	51566851	51570045	ENSSSCG00000061716	-2.51854	0.0168724	-3.15717	0.0060185
ENSSSCG00000062198	18	25524516	25529749	ENSSSCG00000062198	4.40204	0.0329803	5.42576	0.0164702
ENSSSCG00000063142	12	17854613	17857795	ENSSSCG00000063142	13.2032	0.00695883	13.2674	0.0134782
ENSSSCG00000063224	13	203244704	203249515	ENSSSCG00000063224	-15.5229	9.20483e-08	-19.0256	7.68015e-10
ENSSSCG00000063260	13	145305727	145309922	ENSSSCG00000063260	-3.09477	0.0244081	-3.30371	0.0257044
ENSSSCG00000027609	8	68326299	68360262	GC	-20.3455	2.60379e-05	-19.1699	0.000346365	GC
ENSSSCG00000012376	X	56449425	56460392	GDPD2	2.12463	0.0200829	2.90562	0.00418229	GDPD2
ENSSSCG00000021401	17	32040235	32046105	GFRA4	15.7955	0.00116596	15.0304	0.00489584	GFRA4
ENSSSCG00000013148	2	12319599	12337475	GLYATL2	-3.59818	0.0220317	-3.72687	0.0310059	GLYATL2
ENSSSCG00000031035	13	131385044	131386753	GP5	2.17657	0.0347596	2.63108	0.0204825	GP5
ENSSSCG00000040306	2	147216279	147232478	GRXCR2	16.3112	0.000800866	29.8891	2.27731e-08	GRXCR2
ENSSSCG00000007371	17	46783777	46847500	HNF4A	2.59017	0.000396288	2.42297	0.00205689	HNF4A
ENSSSCG00000014626	9	3288172	3297047	HPX	-3.30701	0.0483024	-3.75077	0.0379309	HPX
ENSSSCG00000034570	6	84852793	84857982	IFI6	-2.62763	0.00377278	-2.97204	0.00285007	IFI6
ENSSSCG00000035297	7	115356517	115361538	ISG12(A)	-2.44967	0.00589707	-2.69882	0.00573854
ENSSSCG00000040934	AEMK02000361.1	1670489	1688635	ISX	12.994	0.00797528	-16.714	0.0017488	ISX
ENSSSCG00000034664	7	23834930	23838593	MPIG6B	2.04864	0.0467749	3.13107	0.00579568	MPIG6B
ENSSSCG00000005456	1	251650710	251756608	MUSK	-14.9529	0.00215839	-16.5419	0.00196262	MUSK
ENSSSCG00000001879	7	57935610	57938958	ODF3L1	14.3869	0.00317822	13.9769	0.009043	CIMAP1C
ENSSSCG00000021619	9	1936953	1951889	OVCH2	18.6487	0.00012208	13.219	0.0132457	OVCH2
ENSSSCG00000027710	9	46401713	46406219	PDZD3	2.99204	0.0364119	3.70646	0.019113	NHERF4
ENSSSCG00000030694	10	23689380	23735453	PKP1	3.22279	0.0330162	3.88929	0.0193216	PKP1
ENSSSCG00000004732	1	129201069	129217008	PLA2G4F	-16.0816	0.000958715	-22.4308	2.37394e-05	PLA2G4F
ENSSSCG00000001729	7	42570094	42770225	PTCHD4	-16.4788	0.00070631	-20.256	0.000146152	PTCHD4
ENSSSCG00000031716	5	100787027	101033334	PTPRQ	3.28066	0.00590949	4.76507	0.000367185	PTPRQ
ENSSSCG00000016328	15	137235936	137261057	RAB17	3.63629	0.0284534	3.533	0.0476544	RAB17
ENSSSCG00000037156	17	47628313	47641459	RBPJL	-2.71652	0.0259694	-3.7272	0.00465172	RBPJL
ENSSSCG00000009336	11	8282517	8321020	RXFP2	-15.6131	0.000179021	-15.1561	0.000961986	RXFP2
ENSSSCG00000027409	3	111976845	111983790	TCF23	-3.46142	0.0156931	-3.79996	0.0143444	TCF23
ENSSSCG00000010885	10	19387666	19410024	TLR5	2.90959	0.000302664	2.2554	0.00784363	TLR5
ENSSSCG00000037072	17	47699270	47703212	TP53TG5	16.3964	0.000778271	29.9354	2.41815e-08	TP53TG5
ENSSSCG00000006526	4	94632077	94642705	TRIM46	-2.72798	0.00106248	-2.29817	0.0133447	TRIM46
ENSSSCG00000020309	12	5502966	5503069	U6	3.63522	0.00422794	3.73156	0.00616559

## Sheet: DEGs in MLvsAS & MLvsMA
Ensembl_ID	Chromosome	Gene start (bp)	Gene end (bp)	Gene name	L2FC_MLMA	pvalue_MLMA	L2FC_MLAS	pvalue_MLAS	Human ortholog name
ENSSSCG00000005439	1	249883311	249884630	ACTL7A	-32.7408	8.48102e-14	-28.6744	4.67021e-12	ACTL7A
ENSSSCG00000008634	3	125775099	125825244	ATP6V1C2	-2.27527	0.0318842	-2.18309	0.0295108	ATP6V1C2
ENSSSCG00000018080	MT	8959	9162	ATP8	-10.4146	0.000438642	-8.58027	0.00212795	MT-ATP8
ENSSSCG00000033313	18	47117601	47160344	C7orf31	-8.2598	0.0412704	18.3948	2.36426e-06	SPMIP4
ENSSSCG00000039985	AEMK02000576.1	36075	66041	CES1	-2.339	0.0240881	-2.17386	0.0278981	CES1
ENSSSCG00000007123	17	30422754	30427579	ENSSSCG00000007123	-33.3709	3.62859e-14	-34.5525	7.08422e-17	CST5
ENSSSCG00000008661	3	57247624	57248494	ENSSSCG00000008661	5.42841	0.0008676	4.69678	0.00172295	IGKV2D-30
ENSSSCG00000015806	15	47306535	47376468	ENSSSCG00000015806	-2.8497	0.0313493	-3.54484	0.0046014
ENSSSCG00000018769	1	7230644	7230770	ENSSSCG00000018769	-17.0319	2.68428e-05	-19.5882	2.63654e-07
ENSSSCG00000034648	11	21210717	21211886	ENSSSCG00000034648	-3.1645	0.0277825	-4.62369	0.000521152
ENSSSCG00000034962	7	78772039	78776443	ENSSSCG00000034962	22.698	2.39473e-07	8.77719	0.033632
ENSSSCG00000035807	1	31048535	31049551	ENSSSCG00000035807	-18.7588	1.97195e-05	-15.5981	0.000175395
ENSSSCG00000040009	3	57171802	57172952	ENSSSCG00000040009	-3.82524	0.0108177	-3.12053	0.0288713	IGKV2D-30
ENSSSCG00000040404	9	3522175	3523170	ENSSSCG00000040404	-33.5301	2.40738e-14	-34.0095	2.10529e-16	OR56B4
ENSSSCG00000041266	13	182198632	182202143	ENSSSCG00000041266	-24.8827	4.40123e-11	-20.8065	6.45302e-09
ENSSSCG00000042855	1	269411489	269411590	ENSSSCG00000042855	-2.75824	0.0261442	-2.32172	0.0483268
ENSSSCG00000043768	14	7733889	7741603	ENSSSCG00000043768	-17.6997	1.10234e-06	-17.5729	2.72523e-07
ENSSSCG00000043934	4	69463339	69469728	ENSSSCG00000043934	17.578	6.5953e-05	20.1196	1.26068e-06
ENSSSCG00000045883	6	58765649	58769066	ENSSSCG00000045883	-2.00973	0.0341463	-3.13556	0.000457145	LILRB5
ENSSSCG00000047436	1	161149391	161162484	ENSSSCG00000047436	5.87086	0.00410873	5.6001	0.00327292
ENSSSCG00000047459	1	114236421	114241200	ENSSSCG00000047459	20.2894	3.9228e-06	20.102	1.20712e-06
ENSSSCG00000048542	5	88984225	88989269	ENSSSCG00000048542	-29.4352	2.13435e-11	-34.5065	6.85545e-17	L1TD1
ENSSSCG00000049227	9	10615968	10620116	ENSSSCG00000049227	-15.9408	0.000296855	-20.3801	7.32159e-07
ENSSSCG00000049557	18	7867274	7870460	ENSSSCG00000049557	-3.15815	0.0322049	-3.4809	0.0124954
ENSSSCG00000051219	12	53544894	53546923	ENSSSCG00000051219	-19.5768	8.16795e-06	-16.1545	0.00010205
ENSSSCG00000051398	11	75599739	75600210	ENSSSCG00000051398	-19.2035	1.24141e-05	-16.0773	0.000109306
ENSSSCG00000052022	14	67359782	67362831	ENSSSCG00000052022	-8.81484	0.0416341	15.4194	0.000210378
ENSSSCG00000052105	12	45306426	45320836	ENSSSCG00000052105	-22.4342	1.07142e-13	-16.6645	1.23598e-08	PIPOX
ENSSSCG00000052374	X	83200002	83204183	ENSSSCG00000052374	-3.33424	0.0286261	-3.01699	0.0397092
ENSSSCG00000052572	15	35722829	35729172	ENSSSCG00000052572	-13.6581	0.0018494	28.7913	4.10939e-12
ENSSSCG00000052605	2	66296823	66298128	ENSSSCG00000052605	3.49161	0.0126602	4.53872	0.000570797
ENSSSCG00000052798	X	11831413	11833946	ENSSSCG00000052798	-18.7501	1.99996e-05	-21.0431	3.7655e-07
ENSSSCG00000052820	14	47255412	47261229	ENSSSCG00000052820	-2.50484	0.0347451	-2.94588	0.00842985
ENSSSCG00000053022	9	30430815	30434430	ENSSSCG00000053022	18.8433	1.88569e-05	20.9912	4.26895e-07
ENSSSCG00000053062	17	22045540	22048879	ENSSSCG00000053062	-18.2242	5.33889e-11	-21.2625	1.1982e-16
ENSSSCG00000053085	7	43680189	43684088	ENSSSCG00000053085	-3.78831	0.00147559	-2.97147	0.0114892
ENSSSCG00000053118	AEMK02000525.1	183553	189486	ENSSSCG00000053118	5.2236	0.00295259	3.63308	0.0233743	IGKV1D-42
ENSSSCG00000053179	14	66943899	66965402	ENSSSCG00000053179	-14.084	0.00139085	-16.6514	5.89267e-05
ENSSSCG00000054207	18	2605703	2611316	ENSSSCG00000054207	-2.86281	0.0341046	-2.76814	0.0306138
ENSSSCG00000054298	2	115262484	115269224	ENSSSCG00000054298	18.0773	4.06127e-05	20.4653	8.24177e-07
ENSSSCG00000054722	6	165713651	165718496	ENSSSCG00000054722	-2.72613	0.0179774	-2.86659	0.00989113
ENSSSCG00000055080	3	2747898	2751387	ENSSSCG00000055080	-39.4541	1.48011e-19	-34.305	1.15291e-16
ENSSSCG00000055284	1	236160340	236163643	ENSSSCG00000055284	-33.3933	3.48955e-14	-34.5689	6.85366e-17
ENSSSCG00000055426	3	94256735	94259761	ENSSSCG00000055426	-39.1061	4.06712e-19	-34.8526	4.07342e-17
ENSSSCG00000055822	5	49273637	49279817	ENSSSCG00000055822	-34.7447	1.68469e-15	-29.2289	1.96776e-12
ENSSSCG00000056158	9	87410076	87416683	ENSSSCG00000056158	-32.1262	1.50177e-13	-28.7052	4.86092e-12
ENSSSCG00000056190	9	51583260	51586319	ENSSSCG00000056190	18.4692	2.64705e-05	19.9339	1.47111e-06	OR8B3
ENSSSCG00000056526	14	88468894	88474014	ENSSSCG00000056526	-23.7411	4.81743e-08	-16.6567	6.08711e-05
ENSSSCG00000056662	17	11012274	11013367	ENSSSCG00000056662	-2.36778	0.0110165	-2.08209	0.0202227
ENSSSCG00000056683	5	77935022	77936324	ENSSSCG00000056683	2.66468	0.027335	2.21246	0.0448449
ENSSSCG00000056929	3	79462533	79466564	ENSSSCG00000056929	-17.845	4.99192e-05	-21.052	3.43387e-07
ENSSSCG00000057001	13	132195268	132198633	ENSSSCG00000057001	-42.9961	1.08923e-22	-29.1331	2.2885e-12
ENSSSCG00000057553	1	66223781	66229259	ENSSSCG00000057553	19.1625	1.31465e-05	19.6288	2.16579e-06
ENSSSCG00000057707	14	120854459	120857764	ENSSSCG00000057707	-13.7652	0.00169546	-18.1702	1.09123e-05
ENSSSCG00000059463	9	111669192	111673222	ENSSSCG00000059463	-21.6531	6.26298e-07	-16.6619	6.09745e-05
ENSSSCG00000060331	1	158530407	158533537	ENSSSCG00000060331	-17.4872	7.04472e-05	-18.8638	5.18708e-06
ENSSSCG00000060583	14	127335561	127338653	ENSSSCG00000060583	-22.4475	3.10793e-07	-19.8561	1.65319e-06
ENSSSCG00000060629	15	70394192	70399838	ENSSSCG00000060629	-33.3268	3.4415e-14	-33.8042	3.17964e-16
ENSSSCG00000061307	17	59152116	59156232	ENSSSCG00000061307	-3.21268	0.0262233	-3.58735	0.00915326
ENSSSCG00000061429	5	49427379	49429468	ENSSSCG00000061429	-30.7499	2.97475e-12	-31.2769	4.3675e-14
ENSSSCG00000061513	1	99841653	99844736	ENSSSCG00000061513	-2.64375	0.0275458	-3.17312	0.00471128
ENSSSCG00000061561	9	134961343	134963615	ENSSSCG00000061561	-3.88795	0.0179642	-5.02664	0.00115608
ENSSSCG00000061617	6	144338166	144341086	ENSSSCG00000061617	-32.1249	2.39748e-13	-27.761	2.14551e-11
ENSSSCG00000061734	1	149461991	149470167	ENSSSCG00000061734	-2.45583	0.0197248	-2.33022	0.0226519
ENSSSCG00000062009	7	77111955	77112506	ENSSSCG00000062009	15.832	2.82817e-11	-4.4603	0.0330361	TRDV1
ENSSSCG00000062115	14	138773692	138782162	ENSSSCG00000062115	-21.9352	5.64996e-07	-17.0538	3.93607e-05
ENSSSCG00000062297	10	2611138	2614161	ENSSSCG00000062297	17.578	6.5953e-05	20.1196	1.26068e-06
ENSSSCG00000062470	4	119837168	119843187	ENSSSCG00000062470	17.578	6.5953e-05	20.1196	1.26068e-06
ENSSSCG00000062630	9	3802671	3803761	ENSSSCG00000062630	-22.4749	2.7933e-17	-21.4273	3.72925e-17
ENSSSCG00000062634	17	30735638	30741404	ENSSSCG00000062634	-21.0426	4.90955e-11	-16.8084	3.49586e-08
ENSSSCG00000062641	15	85370491	85375127	ENSSSCG00000062641	18.0773	4.06127e-05	20.4653	8.24177e-07
ENSSSCG00000062748	AEMK02000644.1	9172	9396	ENSSSCG00000062748	-6.23577	0.0162824	-6.15176	0.0124816	SMIM15
ENSSSCG00000063142	12	17854613	17857795	ENSSSCG00000063142	20.0495	5.07796e-06	19.9853	1.3811e-06
ENSSSCG00000027609	8	68326299	68360262	GC	-33.3933	3.48955e-14	-34.5689	6.85366e-17	GC
ENSSSCG00000021401	17	32040235	32046105	GFRA4	17.3605	7.83345e-05	18.1256	1.19862e-05	GFRA4
ENSSSCG00000013148	2	12319599	12337475	GLYATL2	-3.44651	0.0169135	-3.31781	0.0147121	GLYATL2
ENSSSCG00000005116	1	194736877	194743043	GPHB5	-16.7365	0.000142385	-19.096	3.98033e-06	GPHB5
ENSSSCG00000004158	1	27073610	27091236	IL22RA2	-2.49037	0.0167329	-2.80401	0.00470969	IL22RA2
ENSSSCG00000024610	5	18091743	18099178	KRT4	-21.6371	8.64579e-07	-23.7959	8.82408e-09	KRT4
ENSSSCG00000001879	7	57935610	57938958	ODF3L1	20.3337	3.73592e-06	20.7436	5.45868e-07	CIMAP1C
ENSSSCG00000048002	2	11594313	11614510	OOSP3	-19.9793	5.42358e-06	-15.9747	0.000121616	OOSP3
ENSSSCG00000021619	9	1936953	1951889	OVCH2	15.4494	0.000439059	20.8791	4.52679e-07	OVCH2
ENSSSCG00000004732	1	129201069	129217008	PLA2G4F	-34.0718	5.17813e-15	-27.7225	2.52989e-11	PLA2G4F
ENSSSCG00000004038	1	7061192	7110555	PLG	3.2976	0.0169403	2.79832	0.0298906	PLG
ENSSSCG00000023086	6	85595704	85595834	SNORA44	-2.07764	0.0488359	-2.51163	0.0115397	SNORA44
ENSSSCG00000012480	X	82269239	82292246	TNMD	3.38617	0.03322	5.20107	0.00113355	TNMD
