# Supplementary material for: Integrative multi-omics analysis of growth plate regulation underlying body size in miniature pigs
Source: Research Square preprint supplement (doi:10.21203/rs.3.rs-7865536/v1), 2025-12-01
Supplement: Supplementary file 2 [file 1d8022e9f8b7f78e836c7ac7.xlsx]

## Sheet: Variants-GWAS-exp.genes
Supplementary Data 7. GWAS-genes linked to non-coding variants associated with height. Summary of variants from the filtered-subset within ROHR, meeting the following criteria: Located within a predicted functional element (ATAC-peak), assigned to a gene by ABC model, which is expressed in the growth-plate, and found in GWAS catalogue. Transcription factor (TF) binding activities were tested for …
Minipig breed in which variant was found in a ROHR and homozygous mutant	Type	Caller	Var_chr	Var_start	Var_end	Ensembl.ID	PeakID	Peak_chr	Peak_start	Peak_end	signalValue	Contact	adaptedActivity	scaledContact	intergenicScore	TSS.dist	ABC.Score	Gene.chr	Gene.start.(bp)	Gene.end.(bp)	Gene.name	L2FC_AMAS	pvalue_AMAS	L2FC_AMMA	pvalue_AMMA	L2FC_MLMA	pvalue_MLMA	L2FC_MLAS	pvalue_MLAS	Ref	Alt
AM	SNV	GATK	1	242161122	242161122	ENSSSCG00000005389	1:242160997-242161497	1	242160997	242161497	113.167	6.20725	5.96053	33.7875	5.96053	40820.2	0.0605971	1	242058041	242120554	TEX10	0.158957	0.340587	0.19479	0.288397	0.18575	0.215476	0.149916	0.289086	G	A	0/0	0/0	0/0	0/0	0/0	0/0	0/1	0/0	1/1	1/1	0/0	0/0	0/0	1/1	0/0	0/0	0/0	0/0
AM	SNV	GATK	1	265577741	265577741	ENSSSCG00000005593	1:265577402-265577902	1	265577402	265577902	166.5	37.2306	31.3469	100	31.3469	0	0.139058	1	265577704	265604502	OLFML2A	-0.0570502	0.921798	-0.249217	0.696152	0.215944	0.679467	0.408111	0.408069	G	C	0/0	0/0	0/0	0/0	0/0	0/0	0/0	0/0	0/1	0/0	0/0	0/0	0/0	./.	0/0	0/0	0/0	1/1
AM	SNV	GATK	1	265582618	265582618	ENSSSCG00000005593	1:265582313-265582813	1	265582313	265582813	125.333	20.6404	20.0774	55.4392	20.0774	4609.5	0.0493771	1	265577704	265604502	OLFML2A	-0.0570502	0.921798	-0.249217	0.696152	0.215944	0.679467	0.408111	0.408069	G	A	0/0	0/0	0/0	0/0	0/0	0/0	0/0	0/0	1/1	0/0	0/0	0/0	0/0	0/0	0/0	0/0	0/0	1/1
AM	SNV	GATK	1	265582677	265582677	ENSSSCG00000005593	1:265582313-265582813	1	265582313	265582813	125.333	20.6404	20.0774	55.4392	20.0774	4609.5	0.0493771	1	265577704	265604502	OLFML2A	-0.0570502	0.921798	-0.249217	0.696152	0.215944	0.679467	0.408111	0.408069	A	G	0/0	0/0	0/0	0/0	0/0	0/0	0/0	0/0	1/1	0/0	0/0	0/0	0/0	0/0	0/0	0/0	0/0	1/1
AM	SNV	GATK	1	265588455	265588455	ENSSSCG00000005593	1:265588027-265588527	1	265588027	265588527	98.3333	13.7918	12.4596	37.0442	12.4596	10323.5	0.0204751	1	265577704	265604502	OLFML2A	-0.0570502	0.921798	-0.249217	0.696152	0.215944	0.679467	0.408111	0.408069	GA	G	0/0	0/0	0/0	0/0	0/0	0/0	0/0	0/0	0/1	0/0	0/0	0/0	0/0	0/0	0/0	0/0	0/0	1/1
AM	SNV	GATK	1	265593884	265593884	ENSSSCG00000005593	1:265593863-265594363	1	265593863	265594363	188.667	14.974	26.1199	40.2197	26.1199	16159.5	0.0466029	1	265577704	265604502	OLFML2A	-0.0570502	0.921798	-0.249217	0.696152	0.215944	0.679467	0.408111	0.408069	A	T	0/0	0/0	0/0	0/0	0/0	0/0	0/0	0/0	0|1	0/0	0/0	0/0	0/0	0/0	0/0	0/0	0/0	0/0
AM	SNV	GATK	1	265593910	265593910	ENSSSCG00000005593	1:265593863-265594363	1	265593863	265594363	188.667	14.974	26.1199	40.2197	26.1199	16159.5	0.0466029	1	265577704	265604502	OLFML2A	-0.0570502	0.921798	-0.249217	0.696152	0.215944	0.679467	0.408111	0.408069	C	CG	0/0	0/0	0/0	0/0	0/0	0/0	0/0	0/0	1|1	0/0	0/0	0/0	0/0	0/0	0/0	0/0	0/0	0/0
AM	SNV	GATK	3	4698757	4698757	ENSSSCG00000031432	3:4698488-4698988	3	4698488	4698988	148.167	16.2189	14.1537	44.4235	14.1537	17680	0.0512183	3	4716646	4735300	KDELR2	-0.349356	0.324995	-0.517974	0.183886	-0.0831893	0.794393	0.0854282	0.776771	C	T	0/0	0/0	0/0	0/0	0/0	0/0	0/1	0/0	0/1	0/1	0/0	0/0	0/0	./.	0/0	0/0	0/0	0/0
AM	SNV	GATK	3	11571211	11571211	ENSSSCG00000007720	3:11571053-11571553	3	11571053	11571553	97.5	12.5152	13.7204	39.7273	13.7204	23772	0.0344551	3	11538314	11654770	GTF2IRD1	-0.231625	0.529974	-0.488618	0.227443	-0.0188546	0.954542	0.238138	0.446215	A	C	0/0	0/0	0/0	0/0	0/0	0/0	0/0	0/0	0/0	0/0	0/0	0/0	0/0	0/0	0/0	0/0	0/0	0/0
AM	SNV	GATK	3	11571553	11571553	ENSSSCG00000007720	3:11571053-11571553	3	11571053	11571553	97.5	12.5152	13.7204	39.7273	13.7204	23772	0.0344551	3	11538314	11654770	GTF2IRD1	-0.231625	0.529974	-0.488618	0.227443	-0.0188546	0.954542	0.238138	0.446215	G	A	0/0	0/0	0/0	0/0	0/0	0/0	0/0	0/0	0/0	0/0	0/0	0/0	0/0	0/0	0/0	0/0	0/0	0/0
AM	SNV	GATK	3	111676467	111676467	ENSSSCG00000028672	3:111676168-111676668	3	111676168	111676668	60.6667	33.9496	6.61559	100	6.61559	98	0.0930519	3	111649539	111676772	GCKR	0.161648	0.785775	0.158388	0.808463	-0.0231392	0.964358	-0.0198789	0.967632	G	A	0/0	0/0	0/0	0/0	0/0	0/0	0/1	0/0	0/1	0/0	./.	0/0	0/0	1/1	0/0	0/0	./.	0/0
AM	SNV	GATK	3	111680140	111680140	ENSSSCG00000028672	3:111679759-111680259	3	111679759	111680259	118.333	33.9496	10.684	100	10.684	2994	0.150277	3	111649539	111676772	GCKR	0.161648	0.785775	0.158388	0.808463	-0.0231392	0.964358	-0.0198789	0.967632	G	C	0/0	0/0	0/0	0/0	0/0	0/0	0|1	0/0	0|1	0/0	0/0	0/0	0/0	1|1	0/0	0/0	0/0	0/0
AM	SNV	GATK	3	111680167	111680167	ENSSSCG00000028672	3:111679759-111680259	3	111679759	111680259	118.333	33.9496	10.684	100	10.684	2994	0.150277	3	111649539	111676772	GCKR	0.161648	0.785775	0.158388	0.808463	-0.0231392	0.964358	-0.0198789	0.967632	C	A	0/0	0/0	0/0	0/0	0/0	0/0	0|1	0/0	0|1	0/0	0/0	0/0	0/0	1|1	0/0	0/0	0/0	0/0
AM	SNV	GATK	3	111681446	111681446	ENSSSCG00000028672	3:111681142-111681642	3	111681142	111681642	104.333	33.9496	9.42001	100	9.42001	4377	0.132498	3	111649539	111676772	GCKR	0.161648	0.785775	0.158388	0.808463	-0.0231392	0.964358	-0.0198789	0.967632	C	T	0/0	0/0	0/0	0/0	0/0	0/0	0/1	0/0	0/1	1/1	0/0	0/0	0/0	0/1	0/0	0/0	0/0	0/0
AM	SNV	GATK	3	111681521	111681521	ENSSSCG00000028672	3:111681142-111681642	3	111681142	111681642	104.333	33.9496	9.42001	100	9.42001	4377	0.132498	3	111649539	111676772	GCKR	0.161648	0.785775	0.158388	0.808463	-0.0231392	0.964358	-0.0198789	0.967632	C	T	0/0	0/0	0/0	0/0	0/0	0/0	0/1	0/0	0/1	0/0	0/0	0/0	0/0	0/1	0/0	0/0	0/0	0/0
AM	SNV	GATK	4	10182319	10182319	ENSSSCG00000028759	4:10182290-10182790	4	10182290	10182790	354.167	18.4746	207.636	49.9388	207.636	2533	0.26119	4	10179758	10451929	ASAP1	0.00538448	0.986253	0.324796	0.344064	-0.104286	0.710695	-0.423698	0.110265	G	T	0/0	0/0	0/0	0/0	0/0	0/0	0/0	0/0	0/1	0/0	0/0	0/0	0/0	0/0	0/0	0/0	0/0	0/0
AM	SNV	GATK	4	30208745	30208745	ENSSSCG00000019261	4:30208643-30209143	4	30208643	30209143	112.5	1.87524	8.25592	42.3925	8.25592	874946	0.260288	4	29333698	29333800	U6	1.50988	0.757603	1.61558	0.763677	0	1	0	1	G	A	0/0	0/0	0/0	0/0	0/0	0/0	0/1	0/0	0/0	0/0	0/0	0/0	0/0	0/0	0/0	0/0	0/0	0/0
AM	SNV	GATK	4	30209080	30209080	ENSSSCG00000019261	4:30208643-30209143	4	30208643	30209143	112.5	1.87524	8.25592	42.3925	8.25592	874946	0.260288	4	29333698	29333800	U6	1.50988	0.757603	1.61558	0.763677	0	1	0	1	C	G	0/0	0/0	0/0	0/0	0/0	0/0	0/1	0/0	0/0	0/0	0/0	0/0	0/0	0/0	0/0	0/0	0/0	0/0
AM	SNV	GATK	4	75646260	75646260	ENSSSCG00000006247	4:75646178-75646678	4	75646178	75646678	575.5	36.7984	142.752	100	142.752	0	0.965094	4	75646584	75694117	PLAG1	-0.374187	0.681951	-1.01452	0.311839	-1.404	0.093934	-0.763667	0.337696	G	A	0/0	0/0	0/0	0/0	0/0	0/0	0/1	0/0	1/1	1/1	0/0	0/0	0/0	./.	0/0	0/0	./.	1/1
AM	SNV	GATK	4	75667592	75667592	ENSSSCG00000006245	4:75667469-75667969	4	75667469	75667969	84.3333	4.72356	7.47381	60.8255	7.47381	80503.7	0.0740681	4	75586525	75598989	SDR16C5	-0.592451	0.832166	-1.10586	0.718674	-1.4245	0.571222	-0.91109	0.701399	C	T,A	0/0	0/0	1|1	0/0	0/0	0/0	0|1	0/0	1|1	1|1	0/0	0/0	0/0	1/2	0/0	0/0	0/0	1|1
AM	SNV	GATK	4	75667606	75667606	ENSSSCG00000006245	4:75667469-75667969	4	75667469	75667969	84.3333	4.72356	7.47381	60.8255	7.47381	80503.7	0.0740681	4	75586525	75598989	SDR16C5	-0.592451	0.832166	-1.10586	0.718674	-1.4245	0.571222	-0.91109	0.701399	G	A	0/0	0/0	1|1	0/0	0/0	0/0	0|1	0/0	1|1	1|1	0/0	0/0	0/0	0/1	0/0	0/0	0/0	1|1
AM	SNV	GATK	4	75761930	75761930	ENSSSCG00000006245	4:75761858-75762358	4	75761858	75762358	234.667	3.97678	5.56761	51.2091	5.56761	174893	0.0464537	4	75586525	75598989	SDR16C5	-0.592451	0.832166	-1.10586	0.718674	-1.4245	0.571222	-0.91109	0.701399	C	G	0/0	0/0	0/1	0/0	0/0	0/0	1/1	0/0	1/1	1/1	0/0	0/0	0/0	0/0	0/0	0/0	0/0	1/1
AM	SNV	GATK	4	75761951	75761951	ENSSSCG00000006245	4:75761858-75762358	4	75761858	75762358	234.667	3.97678	5.56761	51.2091	5.56761	174893	0.0464537	4	75586525	75598989	SDR16C5	-0.592451	0.832166	-1.10586	0.718674	-1.4245	0.571222	-0.91109	0.701399	C	T	0/0	0/0	0/1	0/0	0/0	0/0	1/1	0/0	1/1	1/1	0/0	0/0	0/0	0|1	0/0	0/0	0/0	1/1
AM	SNV	GATK	4	75761966	75761966	ENSSSCG00000006245	4:75761858-75762358	4	75761858	75762358	234.667	3.97678	5.56761	51.2091	5.56761	174893	0.0464537	4	75586525	75598989	SDR16C5	-0.592451	0.832166	-1.10586	0.718674	-1.4245	0.571222	-0.91109	0.701399	G	A	0/0	0/0	0/1	0/0	0/0	0/0	0/1	0/0	1/1	1/1	0/0	0/0	0/0	0/1	0/0	0/0	0/0	1/1
AM	SNV	GATK	4	75762078	75762078	ENSSSCG00000006245	4:75761858-75762358	4	75761858	75762358	234.667	3.97678	5.56761	51.2091	5.56761	174893	0.0464537	4	75586525	75598989	SDR16C5	-0.592451	0.832166	-1.10586	0.718674	-1.4245	0.571222	-0.91109	0.701399	C	T	0/0	0/0	0/1	0/0	0/0	0/0	0/1	0/0	1/1	1/1	0/0	0/0	0/0	0/1	0/0	0/0	0/0	1/1
AM	SNV	GATK	4	92150201	92150201	ENSSSCG00000018285	4:92150129-92150629	4	92150129	92150629	98.6667	9.88635	7.67669	39.1695	7.67669	14771	0.0330457	4	92165299	92165400	U6	0.403233	0.934493	-0.0912604	0.986484	-0.691187	0.87552	0	1	G	T	0/0	0/0	0/0	0/0	0/0	0/0	0/1	0/0	1/1	1/1	0/0	0/0	0/0	1/1	0/0	0/0	0/0	1/1
AM	SNV	GATK	5	69299596	69299596	ENSSSCG00000041764	5:69299412-69299912	5	69299412	69299912	102.5	12.0238	6.40898	37.7151	6.40898	23995.2	0.0228449	5	69275176	69448430	CACNA1C	-0.250518	0.670208	-0.0785975	0.903307	0.166646	0.752768	-0.00527462	0.991559	G	A	0/0	0/0	0/0	0/0	0/0	0/0	0/1	0/0	0/0	0/0	0/0	0/0	0/0	0/1	0/0	0/0	0/0	1/1
AM	SNV	GATK	6	39826792	39826792	ENSSSCG00000032153	6:39826551-39827051	6	39826551	39827051	102.667	26.3475	26.9291	100	26.9291	1552	0.0901016	6	39813665	39825000	C19orf12	-0.0775924	0.792241	-0.252497	0.435164	-0.00953331	0.971256	0.165371	0.508155	G	A	0/0	0/0	0/0	0/0	0/0	0/0	0/1	0/0	0/0	0/0	0/0	0/0	0/0	0/1	0/0	0/0	0/0	0/0
AM	SNV	GATK	6	89599678	89599678	ENSSSCG00000025344	6:89599474-89599974	6	89599474	89599974	319.667	5.37911	21.5746	23.6058	21.5746	85298	0.029304	6	89574035	89685272	PHC2	-0.313927	0.370376	-0.150793	0.695208	0.144196	0.647289	-0.0189379	0.949235	G	A	0/0	0/0	0/0	0/0	0/0	0/0	0/1	0/0	1/1	0/0	0/0	0/0	0/0	./.	0/0	0/0	0/0	0/0
AM	SNV	GATK	6	152469076	152469076	ENSSSCG00000054968	6:152468626-152469126	6	152468626	152469126	99.8333	6.24364	6.06402	100	6.06402	27261	0.177372	6	152496387	152496493	U6	0.291544	0.926666	0.116596	0.973267	-1.33343	0.64031	-1.15849	0.667274	T	A	0/0	0/0	0/0	0/0	0/0	0/0	0/0	0/0	0/0	0/0	0/0	0/0	0/0	0/1	0/0	0/0	0/0	0/1
AM	SNV	GATK	7	54449735	54449735	ENSSSCG00000001832	7:54449345-54449845	7	54449345	54449845	99.8333	31.1921	16.3422	100	16.3422	0	0.161002	7	54449816	54519194	ACAN	-0.566269	0.611489	-0.944699	0.440302	-1.21219	0.226649	-0.833756	0.378301	C	A	0/0	0/0	1/1	./.	0/0	0/0	0/0	0/0	1/1	0/0	./.	./.	./.	./.	0/0	0/0	./.	0/0
AM	SNV	GATK	7	54455469	54455469	ENSSSCG00000001832	7:54455151-54455651	7	54455151	54455651	89.6667	14.1438	10.0163	45.3443	10.0163	5336	0.0447458	7	54449816	54519194	ACAN	-0.566269	0.611489	-0.944699	0.440302	-1.21219	0.226649	-0.833756	0.378301	C	T	0/0	0/0	1/1	0/0	0/0	0/0	0/0	0/0	1/1	0/0	0/0	0/0	0/0	0/1	0/0	0/0	0/0	0/0
AM	SNV	GATK	9	33315408	33315408	ENSSSCG00000031429	9:33314964-33315464	9	33314964	33315464	97	3.01767	3.2627	19.6918	3.2627	485661	0.0206347	9	32811416	32925603	YAP1	0.0814873	0.826807	-0.159496	0.696501	0.163423	0.625419	0.404406	0.200698	C	T	0/0	0/0	0/0	0/0	0/0	0/0	0/0	0/0	0/0	0/0	0/0	0/0	0/0	1/1	0/0	0/0	0/0	0/0
AM	SNV	GATK	9	33315452	33315452	ENSSSCG00000031429	9:33314964-33315464	9	33314964	33315464	97	3.01767	3.2627	19.6918	3.2627	485661	0.0206347	9	32811416	32925603	YAP1	0.0814873	0.826807	-0.159496	0.696501	0.163423	0.625419	0.404406	0.200698	C	T	0/0	0/0	0/0	0/0	0/0	0/0	0/0	0/0	0/0	0/0	0/0	0/0	0/0	1/1	0/0	0/0	0/0	0/0
AM	SNV	GATK	9	130884220	130884220	ENSSSCG00000038855	9:130883832-130884332	9	130883832	130884332	129.5	13.679	12.5863	59.2005	12.5863	19893	0.0479972	9	130904225	130904330	U6	-0.467876	0.924011	-0.450901	0.933285	0.519476	0.906187	0.502502	0.90388	T	G	0/0	0/0	0/0	0/0	0/0	0/0	0/1	0/0	0/1	0/1	0/0	0/0	0/0	0/1	0/0	0/0	0/0	0/0
AM	SNV	GATK	9	136673311	136673311	ENSSSCG00000020248	9:136673091-136673591	9	136673091	136673591	134.167	12.4954	31.4155	47.8507	31.4155	40801	0.0386563	9	136714285	136714392	U6	-0.317996	0.941301	-0.0886701	0.985048	-0.000654421	0.999864	-0.229981	0.949383	C	G	0/0	0/0	0/0	0/0	0/0	0/0	0/0	0/0	1/1	0/0	0/0	0/0	0/0	0/0	0/0	0/0	0/0	0/1
AM	SNV	GATK	9	136674334	136674334	ENSSSCG00000020248	9:136674187-136674687	9	136674187	136674687	182.5	12.4954	42.7327	47.8507	42.7327	39705	0.052582	9	136714285	136714392	U6	-0.317996	0.941301	-0.0886701	0.985048	-0.000654421	0.999864	-0.229981	0.949383	C	A	0/0	0/0	0/0	0/0	0/0	0/0	0/0	0/0	1/1	0/0	0/0	0/0	0/0	0/1	0/0	0/0	0/0	0/1
AM	SNV	GATK	9	136674404	136674404	ENSSSCG00000020248	9:136674187-136674687	9	136674187	136674687	182.5	12.4954	42.7327	47.8507	42.7327	39705	0.052582	9	136714285	136714392	U6	-0.317996	0.941301	-0.0886701	0.985048	-0.000654421	0.999864	-0.229981	0.949383	G	A	0/0	0/0	0/0	0/0	0/0	0/0	0/0	0/0	1/1	0/0	0/0	0/0	0/0	0/0	0/0	0/0	0/0	0/1
AM	SNV	GATK	9	136681832	136681832	ENSSSCG00000015631	9:136681817-136682317	9	136681817	136682317	212	7.3201	24.9588	26.5139	24.9588	59439	0.020966	9	136580362	136741756	GRB10	0.175573	0.410045	0.398184	0.0890408	0.293875	0.125342	0.0712642	0.693582	C	A	0/0	0/0	0/0	0/0	0/0	0/0	0/0	0/0	1|1	0/0	0/0	0/0	0/0	0|1	0/0	0/0	0/0	0/0
AM	SNV	GATK	9	136681832	136681832	ENSSSCG00000023303	9:136681817-136682317	9	136681817	136682317	212	5.45344	18.5942	28.366	18.5942	193606	0.0268347	9	136484216	136488250	FIGNL1	0.279516	0.468641	0.368916	0.385137	0.0865028	0.803712	-0.00289682	0.992951	C	A	0/0	0/0	0/0	0/0	0/0	0/0	0/0	0/0	1|1	0/0	0/0	0/0	0/0	0|1	0/0	0/0	0/0	0/0
AM	SNV	GATK	9	136682179	136682179	ENSSSCG00000015631	9:136681817-136682317	9	136681817	136682317	212	7.3201	24.9588	26.5139	24.9588	59439	0.020966	9	136580362	136741756	GRB10	0.175573	0.410045	0.398184	0.0890408	0.293875	0.125342	0.0712642	0.693582	C	T	0/0	0/0	0/0	0/0	0/0	0/0	0/0	0/0	1/1	0/0	0/0	0/0	0/0	0/0	0/0	0/0	0/0	0/1
AM	SNV	GATK	9	136682179	136682179	ENSSSCG00000023303	9:136681817-136682317	9	136681817	136682317	212	5.45344	18.5942	28.366	18.5942	193606	0.0268347	9	136484216	136488250	FIGNL1	0.279516	0.468641	0.368916	0.385137	0.0865028	0.803712	-0.00289682	0.992951	C	T	0/0	0/0	0/0	0/0	0/0	0/0	0/0	0/0	1/1	0/0	0/0	0/0	0/0	0/0	0/0	0/0	0/0	0/1
AM	SNV	GATK	9	136713559	136713559	ENSSSCG00000020248	9:136713533-136714033	9	136713533	136714033	82.1667	26.1134	32.2858	100	32.2858	359	0.0830234	9	136714285	136714392	U6	-0.317996	0.941301	-0.0886701	0.985048	-0.000654421	0.999864	-0.229981	0.949383	C	T	0/0	0/0	0/0	0/0	0/0	0/0	0/0	0/0	0|1	0/0	0/0	0/0	0/0	0|1	0/0	0/0	0/0	0/0
AM	SNV	GATK	12	33041604	33041604	ENSSSCG00000017609	12:33041513-33042013	12	33041513	33042013	114.333	1.25116	3.05833	45.6323	3.05833	612055	0.0304422	12	32321340	32821340	ANKFN1	0.231906	0.888434	1.02314	0.581316	-0.0486505	0.974845	-0.839882	0.553898	C	T	0/0	0/0	0/0	0/0	0/0	0/0	0/0	0/0	1/1	0/0	0/0	0/0	0/0	1/1	0/0	0/0	0/0	0/0
AM	SNV	GATK	12	36817273	36817273	ENSSSCG00000022980	12:36816927-36817427	12	36816927	36817427	107	15.7816	31.2144	59.8557	31.2144	16900	0.0834565	12	36802354	36834327	TBX4	-0.136462	0.907488	-1.37177	0.283798	-1.0387	0.316447	0.19661	0.842437	G	A	0/0	0/0	0/0	0/0	0/0	0/0	0/1	0/0	1/1	0/1	0/0	0/0	0/0	0/0	0/0	0/0	0/0	1/1
AM	SNV	GATK	13	82053928	82053928	ENSSSCG00000011672	13:82053678-82054178	13	82053678	82054178	329.167	7.53883	32.2641	26.6052	32.2641	176000	0.0583054	13	82230178	82352756	RASA2	-0.872292	0.0570285	0.382403	0.447737	-0.136959	0.74	-1.39165	0.000349374	G	A	0/0	0/0	0/0	0/0	0/0	0/0	0/1	0/0	1/1	0/0	0/0	0/0	0/0	1/1	0/0	0/0	0/0	0/1
AM	SNV	GATK	13	82053928	82053928	ENSSSCG00000022073	13:82053678-82054178	13	82053678	82054178	329.167	6.64878	28.4549	57.1488	28.4549	58023.2	0.0740475	13	82064565	82195319	ZBTB38	-0.0229337	0.934589	-0.280081	0.361321	-0.168963	0.50123	0.0881837	0.710112	G	A	0/0	0/0	0/0	0/0	0/0	0/0	0/1	0/0	1/1	0/0	0/0	0/0	0/0	1/1	0/0	0/0	0/0	0/1
AM	SNV	GATK	13	139925672	139925672	ENSSSCG00000034616	13:139925565-139926065	13	139925565	139926065	110.667	29.8032	23.9449	100	23.9449	1716	0.25411	13	139927781	139948702	LRRC58	0.000436817	0.998674	-0.103569	0.719646	-0.202088	0.392525	-0.0980825	0.660291	G	T	0/0	0/0	0/0	0/0	0/0	0/0	0/1	0/0	1/1	0/0	0/0	0/0	0/0	0/1	0/0	0/0	0/0	0/0
AM	SNV	GATK	13	139925760	139925760	ENSSSCG00000034616	13:139925565-139926065	13	139925565	139926065	110.667	29.8032	23.9449	100	23.9449	1716	0.25411	13	139927781	139948702	LRRC58	0.000436817	0.998674	-0.103569	0.719646	-0.202088	0.392525	-0.0980825	0.660291	G	A	0/0	0/0	0/0	0/0	0/0	0/0	0|1	0/0	1|1	0/0	0/0	0/0	0/0	0|1	0/0	0/0	0/0	0/0
AM	SNV	GATK	13	139927378	139927378	ENSSSCG00000034616	13:139927332-139927832	13	139927332	139927832	273.833	29.8032	59.249	100	59.249	0	0.628767	13	139927781	139948702	LRRC58	0.000436817	0.998674	-0.103569	0.719646	-0.202088	0.392525	-0.0980825	0.660291	C	T	0/0	0/0	0/0	0/0	0/0	0/0	0|1	0/0	1|1	0/0	0/0	0/0	0/0	1|1	0/0	0/0	0/0	0/0
AM	SNV	GATK	13	139927402	139927402	ENSSSCG00000034616	13:139927332-139927832	13	139927332	139927832	273.833	29.8032	59.249	100	59.249	0	0.628767	13	139927781	139948702	LRRC58	0.000436817	0.998674	-0.103569	0.719646	-0.202088	0.392525	-0.0980825	0.660291	G	A	0/0	0/0	0/0	0/0	0/0	0/0	0/1	0/0	1/1	0/0	0/0	0/0	0/0	0/1	0/0	0/0	0/0	0/0
AM	SNV	GATK	13	139927489	139927489	ENSSSCG00000034616	13:139927332-139927832	13	139927332	139927832	273.833	29.8032	59.249	100	59.249	0	0.628767	13	139927781	139948702	LRRC58	0.000436817	0.998674	-0.103569	0.719646	-0.202088	0.392525	-0.0980825	0.660291	C	T	0/0	0/0	0/0	0/0	0/0	0/0	0/1	0/0	1|1	0/0	0/0	0/0	0/0	0/1	0/0	0/0	0/0	0/0
AM	SNV	GATK	13	139927518	139927518	ENSSSCG00000034616	13:139927332-139927832	13	139927332	139927832	273.833	29.8032	59.249	100	59.249	0	0.628767	13	139927781	139948702	LRRC58	0.000436817	0.998674	-0.103569	0.719646	-0.202088	0.392525	-0.0980825	0.660291	AT	A	0|0	0/0	0/0	0/0	0/0	0/0	0|1	0/0	1|1	0/0	0/0	0/0	0/0	0|1	0/0	0/0	0/0	0/0
AM	SNV	GATK	13	139927522	139927522	ENSSSCG00000034616	13:139927332-139927832	13	139927332	139927832	273.833	29.8032	59.249	100	59.249	0	0.628767	13	139927781	139948702	LRRC58	0.000436817	0.998674	-0.103569	0.719646	-0.202088	0.392525	-0.0980825	0.660291	G	C	0/0	0/0	0/0	0/0	0/0	0/0	0|1	0/0	1|1	0/0	0/0	0/0	0/0	0|1	0/0	0/0	0/0	0/0
AM	SNV	GATK	14	123927880	123927880	ENSSSCG00000010647	14:123927643-123928143	14	123927643	123928143	99.8333	3.99772	10.1806	19.0846	10.1806	472187	0.0264464	14	124400330	124401739	ADRB1	-0.0639912	0.939739	-0.345125	0.711577	-0.699153	0.366408	-0.418019	0.569084	G	A	0/0	0/0	0/0	0/0	0/0	0/0	0/1	0/0	1/1	1/1	0/0	0/0	0/0	0/0	0/0	0/0	0/0	0/0
AM	SNV	GATK	14	124173612	124173612	ENSSSCG00000010645	14:124173459-124173959	14	124173459	124173959	113.333	9.379	17.2181	27.8319	17.2181	10939	0.0570277	14	124162521	124236814	NHLRC2	0.0136905	0.968467	0.287112	0.450934	0.0589763	0.850126	-0.214446	0.465997	G	A	0/0	0/0	0/0	0/0	0/0	0/0	0/1	0/0	0/1	0/1	0/0	0/0	0/0	0/0	0/0	0/0	0/0	0/1
AM	INS	Manta	16	50711143	50711143	ENSSSCG00000016981	16:50710701-50711201	16	50710701	50711201	126.333	8.34789	9.80519	36.8692	9.80519	212383	0.0230238	16	50430348	50498938	CPEB4	-0.376334	0.593378	0.676584	0.382068	-0.619603	0.328434	-1.67252	0.00518832			./.	./.	./.	./.	./.	./.	./.	./.	1/1	./.	./.	./.	./.	1/1	./.	./.	./.	./.
AM	SNV	GATK	16	51324968	51324968	ENSSSCG00000016988	16:51324739-51325239	16	51324739	51325239	102.833	29.0395	38.2123	81.3762	38.2123	4930	0.0606355	16	51285493	51330169	ERGIC1	0.161566	0.298196	0.000819728	0.996164	-0.198316	0.155635	-0.037569	0.776054	C	T	0/0	0/0	0/0	0/0	0/0	0/0	0/0	0/0	1/1	0/0	0/0	0/0	0/0	./.	0/0	0/0	0/0	0/0
AM	SNV	GATK	16	51325013	51325013	ENSSSCG00000016988	16:51324739-51325239	16	51324739	51325239	102.833	29.0395	38.2123	81.3762	38.2123	4930	0.0606355	16	51285493	51330169	ERGIC1	0.161566	0.298196	0.000819728	0.996164	-0.198316	0.155635	-0.037569	0.776054	T	G	0/0	0/0	0/0	0/0	0/0	0/0	0/0	0/0	1/1	0/0	0/0	0/0	0/0	0/0	0/0	0/0	0/0	0/0
AM	SNV	GATK	16	51333172	51333172	ENSSSCG00000016988	16:51332764-51333264	16	51332764	51333264	115	35.6855	51.7843	100	51.7843	2596	0.100977	16	51285493	51330169	ERGIC1	0.161566	0.298196	0.000819728	0.996164	-0.198316	0.155635	-0.037569	0.776054	G	C	0/0	0/0	0/0	0/0	0/0	0/0	0/0	0/0	1/1	0/0	0/0	0/0	0/0	0/1	0/0	0/0	0/0	0/0
AM	SNV	GATK	16	52781878	52781878	ENSSSCG00000016998	16:52781650-52782150	16	52781650	52782150	344.333	31.4762	38.2692	100	38.2692	0	0.630532	16	52765298	52781771	NPM1	-0.0350289	0.879593	0.00264158	0.9917	0.197472	0.342343	0.159801	0.415581	T	A	0/0	0/0	0/0	0/0	0/0	0/0	0/0	0/0	0/0	0/0	0/0	0/0	0/0	0/0	0/0	0/0	0/0	1/1
AM	SNV	GATK	16	53586366	53586366	ENSSSCG00000017018	16:53585961-53586461	16	53585961	53586461	85	1.44912	2.48317	97.6558	2.48317	2.56697e+06	0.0664774	16	55625320	56620257	TENM2	1.24215	0.250969	0.063868	0.956807	0.416246	0.66382	1.59453	0.0803496	G	A	0/0	0/0	0/0	0/0	0/0	0/0	0/1	0/0	0/0	0/0	0/0	0/0	0/0	0/0	0/0	0/0	0/0	1/1
AM	SNV	GATK	16	53586461	53586461	ENSSSCG00000017018	16:53585961-53586461	16	53585961	53586461	85	1.44912	2.48317	97.6558	2.48317	2.56697e+06	0.0664774	16	55625320	56620257	TENM2	1.24215	0.250969	0.063868	0.956807	0.416246	0.66382	1.59453	0.0803496	C	T	0/0	0/0	0/0	0/0	0/0	0/0	0/1	0/0	0/0	0/0	0/0	0/0	0/0	0/0	0/0	0/0	0/0	1/1
AM	SNV	GATK	18	45327833	45327833	ENSSSCG00000016692	18:45327479-45327979	18	45327479	45327979	89.3333	5.1034	6.13309	25.3293	6.13309	417454	0.0281152	18	44827095	44910235	TAX1BP1	-0.136014	0.460234	0.0974307	0.630108	-0.0540139	0.744499	-0.287459	0.0660573	AGGCGGCGGC	A	0/0	0/0	0/0	0/0	0/0	0/0	0/0	0/0	0/1	0/0	./.	./.	0/0	./.	0/0	0/0	./.	1/1
AM	SNV	GATK	18	46244828	46244828	ENSSSCG00000026894	18:46244766-46245266	18	46244766	46245266	106.667	20.7066	25.433	60.8032	25.433	4990	0.0669763	18	46217517	46250256	NFE2L3	0.635718	0.208119	0.325129	0.557298	-0.0523454	0.908065	0.258244	0.547504	C	T	0/0	0/0	0/0	0/0	0/0	0/0	0/0	0/0	1|1	0/0	0/0	0/0	0/0	./.	0/0	0/0	0/0	0/0
ML	SNV	GATK	1	32362266	32362266	ENSSSCG00000004199	1:32361911-32362411	1	32361911	32362411	500.833	5.28343	23.9493	17.9022	23.9493	56156.4	0.105954	1	32418217	32630638	EPB41L2	-0.108823	0.750627	-0.366295	0.329972	-0.0899567	0.770186	0.167515	0.564397	G	A	0/0	0/0	0/0	0/0	0/0	0/0	0/0	0/0	0/0	1/1	0/0	0/0	0/0	0/0	0/0	0/0	0/0	0/0
ML	SNV	GATK	1	32362266	32362266	ENSSSCG00000036790	1:32361911-32362411	1	32361911	32362411	500.833	10.1523	46.0194	67.2107	46.0194	71295	0.563688	1	32221066	32362149	AKAP7	-0.203046	0.385783	-0.141867	0.581803	-0.126705	0.548814	-0.187884	0.345695	G	A	0/0	0/0	0/0	0/0	0/0	0/0	0/0	0/0	0/0	1/1	0/0	0/0	0/0	0/0	0/0	0/0	0/0	0/0
ML	SNV	GATK	1	203938511	203938511	ENSSSCG00000040366	1:203938095-203938595	1	203938095	203938595	76.3333	2.77996	5.80877	65.8474	5.80877	538320	0.056685	1	203936657	204942412	ADAMTSL1	-0.34486	0.651293	-0.0391939	0.962747	-0.646789	0.348076	-0.952455	0.142732	C	T	0/0	0/0	0/0	0/0	0/0	0/0	0/0	0/0	0/0	1/1	0/0	0/0	0/0	0/0	0/0	0/0	0/0	0/0
ML	SNV	GATK	1	205924884	205924884	ENSSSCG00000005180	1:205924871-205925371	1	205924871	205925371	102.333	10.5106	17.7029	100	17.7029	83081.5	0.224014	1	205925091	206372121	BNC2	0.489925	0.411431	-0.229968	0.722941	-0.336749	0.522345	0.383143	0.445978	T	TTTC	0/0	0/0	0/0	0/0	0/0	0/0	0/0	0/0	0/0	1/1	./.	0/0	0/0	./.	0/0	0/0	./.	0/0
ML	SNV	GATK	2	134552644	134552644	ENSSSCG00000014274	2:134552490-134552990	2	134552490	134552990	135.167	38.7189	27.2418	100	27.2418	2676	0.248785	2	134555666	134570348	PDLIM4	-0.492674	0.33506	-0.539031	0.336901	0.0215056	0.962675	0.0678626	0.875674	TC	T	0/0	0/0	0/0	0/0	0/0	0/0	0/0	0/0	0/0	1/1	0/0	0/0	0/0	0/0	0/0	0/0	0/0	0/0
ML	SNV	GATK	2	134554789	134554789	ENSSSCG00000014274	2:134554345-134554845	2	134554345	134554845	87.1667	38.7189	17.5677	100	17.5677	821	0.160437	2	134555666	134570348	PDLIM4	-0.492674	0.33506	-0.539031	0.336901	0.0215056	0.962675	0.0678626	0.875674	C	A	0/0	0/0	0/0	0/0	0/0	0/0	0/0	0/0	0/0	1/1	0/0	0/0	0/0	0/0	0/0	0/0	0/0	0/0
ML	SNV	GATK	3	18538882	18538882	ENSSSCG00000007804	3:18538816-18539316	3	18538816	18539316	67.3333	21.4765	4.8453	71.6399	4.8453	9719	0.0346384	3	18524820	18543135	SH2B1	-0.0512841	0.718241	-0.148479	0.341919	-0.0544027	0.670219	0.0427923	0.722868	C	T	0/0	0/0	0/0	0/0	0/0	0/0	0/0	0/0	0/0	1|1	0/0	0/0	0/0	0/0	0/0	0/0	0/0	0/0
ML	SNV	GATK	3	74006061	74006061	ENSSSCG00000036115	3:74005749-74006249	3	74005749	74006249	94.1667	10.9851	12.7075	66.2347	12.7075	5600	0.0703265	3	74000517	74068172	PPP3R1	-0.109007	0.492975	-0.0427281	0.806759	-0.0928945	0.5162	-0.159174	0.238451	C	G	0/0	0/0	0/1	0/0	0/0	0/0	0/1	0/0	0/1	1/1	0/0	0/0	0/0	0/0	0/0	0/0	0/0	0/0
ML	SNV	GATK	4	16378543	16378543	ENSSSCG00000021586	4:16378334-16378834	4	16378334	16378834	75	7.94694	8.73058	47.0735	8.73058	120678	0.0503012	4	16374902	16553002	ZHX2	0.0459785	0.900636	0.27788	0.49219	0.188749	0.568745	-0.0431524	0.890151	C	T	0/0	0/0	0/0	0/0	0/0	0/0	0|1	0/0	0|1	1|1	0/0	0/0	0/0	0/0	0/0	0/0	0/0	0/0
ML	SNV	GATK	4	16378762	16378762	ENSSSCG00000021586	4:16378334-16378834	4	16378334	16378834	75	7.94694	8.73058	47.0735	8.73058	120678	0.0503012	4	16374902	16553002	ZHX2	0.0459785	0.900636	0.27788	0.49219	0.188749	0.568745	-0.0431524	0.890151	A	G	0/0	0/0	0/0	0/0	0/0	0/0	0/1	0/0	0/1	1/1	0/0	0/0	0/0	0/0	0/0	0/0	0/0	0/0
ML	SNV	GATK	4	19459469	19459469	ENSSSCG00000006001	4:19459425-19459925	4	19459425	19459925	271.833	3.12202	18.9333	21.862	18.9333	124061	0.058096	4	19319810	19433488	ENPP2	-0.391898	0.443616	-0.548018	0.329267	-0.0596785	0.896777	0.0964412	0.82423	T	C	0/0	0/0	0/0	0/0	0/0	0/0	0/0	0/0	0/0	1|1	0/0	0/0	0/0	0/0	0/0	0/0	0/0	0/0
ML	SNV	GATK	4	19461749	19461749	ENSSSCG00000006001	4:19461431-19461931	4	19461431	19461931	84.3333	5.6523	10.0123	39.5804	10.0123	126067	0.0585188	4	19319810	19433488	ENPP2	-0.391898	0.443616	-0.548018	0.329267	-0.0596785	0.896777	0.0964412	0.82423	A	C	0/0	0/0	0/0	0/0	0/0	0/0	0/0	0/0	0/0	1|1	0/0	0/0	0/0	0/0	0/0	0/0	0/0	0/0
ML	SNV	GATK	4	19461750	19461750	ENSSSCG00000006001	4:19461431-19461931	4	19461431	19461931	84.3333	5.6523	10.0123	39.5804	10.0123	126067	0.0585188	4	19319810	19433488	ENPP2	-0.391898	0.443616	-0.548018	0.329267	-0.0596785	0.896777	0.0964412	0.82423	G	A	0/0	0/0	0/0	0/0	0/0	0/0	0/0	0/0	0/0	1|1	0/0	0/0	0/0	0/0	0/0	0/0	0/0	0/0
ML	SNV	GATK	4	19463232	19463232	ENSSSCG00000006001	4:19462807-19463307	4	19462807	19463307	70.3333	5.6523	8.35016	39.5804	8.35016	127443	0.0488042	4	19319810	19433488	ENPP2	-0.391898	0.443616	-0.548018	0.329267	-0.0596785	0.896777	0.0964412	0.82423	C	CACT,*	0/0	0/0	0/0	0/0	0/0	0/0	0/0	0/0	0/0	1/1	0/0	0/0	0/0	0/2	0/0	0/0	0/0	0/0
ML	SNV	GATK	5	60843332	60843332	ENSSSCG00000024152	5:60843105-60843605	5	60843105	60843605	69	5.9491	8.00917	30.9757	8.00917	66356	0.0216193	5	60523433	60776750	ETV6	-0.189525	0.472572	0.278117	0.337581	0.036449	0.878096	-0.431193	0.0543068	G	C	0/0	0/0	0/0	0/0	0/0	0/0	0/0	0/0	0/0	1/1	0/0	0/0	0/0	0/0	0/0	0/0	0/0	0/0
ML	SNV	GATK	5	88697028	88697028	ENSSSCG00000053891	5:88696609-88697109	5	88696609	88697109	120	6.12123	11.0298	36.9451	11.0298	887472	0.0570039	5	89581090	89584581	SOCS2	0.273242	0.551799	-0.329915	0.512368	0.150849	0.713886	0.754007	0.0525738	T	TCAGGACCC	0/0	0/0	0/0	0/0	0/0	0/0	0/0	0/0	0/0	1/1	0/0	0/0	0/0	./.	0/0	0/0	0/0	0/0
ML	SNV	GATK	8	40888586	40888586	ENSSSCG00000008840	8:40888568-40889068	8	40888568	40889068	64.6667	21.6337	19.2212	64.4327	19.2212	7017	0.199663	8	40881552	40883995	GSX2	2.8296	0.560562	2.89733	0.587893	0.35193	0.936424	0.284201	0.945594	A	G	0/0	0/0	0/0	0/0	0/0	0/0	0/0	0/0	0/1	1/1	0/0	0/0	0/0	0/0	0/0	0/0	0/0	0/1
ML	SNV	GATK	10	1140343	1140343	ENSSSCG00000032416	10:1140259-1140759	10	1140259	1140759	101	10.9068	14.0162	38.1653	14.0162	10979	0.0369327	10	1147458	1151738	RGS1	0.183976	0.673415	-0.0755921	0.8747	0.130946	0.738738	0.390515	0.291993	C	T	0/0	0/0	0/0	0/0	0/0	0/0	0/0	0/0	0|1	1|1	0/0	0/0	0/0	0/1	0/0	0/0	0/0	0/0
ML	SNV	GATK	10	16803906	16803906	ENSSSCG00000010872	10:16803526-16804026	10	16803526	16804026	70.6667	4.61055	6.0043	25.3784	6.0043	106732	0.0322395	10	16441447	16741337	AKT3	0.175967	0.466451	0.105077	0.692119	0.0488983	0.821913	0.119788	0.559148	C	CT	0/0	0/0	0/0	0/0	0/0	0/0	0/0	0/0	0/0	1/1	0/0	0/0	0/0	0/0	0/0	0/0	0/0	0/0
ML	SNV	GATK	13	12335528	12335528	ENSSSCG00000011212	13:12335227-12335727	13	12335227	12335727	70.1667	27.712	28.0009	100	28.0009	1245	0.188543	13	12336972	12507680	RARB	-0.207622	0.628964	-0.056122	0.905402	0.118912	0.758176	-0.0325879	0.928709	T	C	0/0	0/0	0/0	0/0	0/0	0/0	0/1	0/0	0/0	1/1	0/0	0/0	0/0	0/0	0/0	0/0	0/0	0/0
ML	SNV	GATK	13	31553590	31553590	ENSSSCG00000011363	13:31553109-31553609	13	31553109	31553609	373.5	7.22664	8.34243	21.9196	8.34243	35988	0.0398522	13	31426213	31517122	PRKAR2A	-0.16422	0.375803	-0.241646	0.235468	-0.147326	0.377246	-0.0699002	0.657226	G	A	0/0	0/0	0/0	0/0	0/0	0/0	0/1	0/0	0/0	1/1	0/0	0/0	0/0	0/0	0/0	0/0	0/0	0/0
ML	SNV	GATK	13	35203227	35203227	ENSSSCG00000011454	13:35203039-35203539	13	35203039	35203539	75.6667	11.3751	4.94306	45.8962	4.94306	22998	0.0472669	13	35025769	35180042	SFMBT1	0.0221858	0.916671	0.187781	0.421435	0.30103	0.114481	0.135435	0.450444	G	T	0/0	0/0	0/0	0/0	0/0	0/0	0/1	0/0	1/1	1/1	0/0	0/0	0/0	0/1	0/0	0/0	0/0	1/1
ML	SNV	GATK	13	38367567	38367567	ENSSSCG00000024417	13:38367258-38367758	13	38367258	38367758	252.167	21.1538	41.2238	100	41.2238	0	0.861019	13	37388517	38367504	ERC2	0.280101	0.754856	-0.38619	0.693685	-0.906471	0.257285	-0.24018	0.752291	C	T	0/0	0/0	0/0	0/0	0/0	0/0	0/1	0/0	0/1	1/1	0/0	0/0	0/0	./.	0/0	0/0	0/0	1/1
ML	SNV	GATK	13	125376084	125376084	ENSSSCG00000011810	13:125375710-125376210	13	125375710	125376210	126.5	5.76597	9.80892	26.2317	9.80892	17120	0.0319957	13	125377250	125393330	BCL6	-0.238103	0.577957	0.302193	0.520309	0.066822	0.862211	-0.473474	0.192488	TTCCACGCCCCTGC	T	0/0	0/0	0/0	0/0	0/0	0/0	0/1	0/0	0/1	1/1	0/0	0/0	0/0	1/1	0/0	0/0	0/0	0/0
ML	SNV	GATK	13	146890350	146890350	ENSSSCG00000011923	13:146890266-146890766	13	146890266	146890766	69.6667	10.7015	8.58684	49.5541	8.58684	11275	0.0466549	13	146902041	146915162	NEPRO	0.0975153	0.480485	0.171359	0.26289	0.113362	0.360381	0.0395191	0.734101	G	A	0/0	0/0	0/0	0/0	0/0	0/0	0/0	0/0	0/0	1/1	0/0	0/0	0/0	0/0	0/0	0/0	0/0	0/0
ML	SNV	GATK	13	146890669	146890669	ENSSSCG00000011923	13:146890266-146890766	13	146890266	146890766	69.6667	10.7015	8.58684	49.5541	8.58684	11275	0.0466549	13	146902041	146915162	NEPRO	0.0975153	0.480485	0.171359	0.26289	0.113362	0.360381	0.0395191	0.734101	T	C	0/0	0/0	0/0	0/0	0/0	0/0	0/0	0/0	0/0	1/1	0/0	0/0	0/0	0/0	0/0	0/0	0/0	0/0
ML	SNV	GATK	13	146890734	146890734	ENSSSCG00000011923	13:146890266-146890766	13	146890266	146890766	69.6667	10.7015	8.58684	49.5541	8.58684	11275	0.0466549	13	146902041	146915162	NEPRO	0.0975153	0.480485	0.171359	0.26289	0.113362	0.360381	0.0395191	0.734101	T	A	0/0	0/0	0/0	0/0	0/0	0/0	0/0	0/0	0/0	1/1	0/0	0/0	0/0	0/0	0/0	0/0	0/0	0/0
ML	SNV	GATK	13	146898294	146898294	ENSSSCG00000011923	13:146897922-146898422	13	146897922	146898422	69.3333	21.5956	14.4548	100	14.4548	3619	0.158488	13	146902041	146915162	NEPRO	0.0975153	0.480485	0.171359	0.26289	0.113362	0.360381	0.0395191	0.734101	A	G	0/0	0/0	0/0	0/0	0/0	0/0	0/0	0/0	0/0	1/1	0/0	0/0	0/0	0/0	0/0	0/0	0/0	0/0
ML	SNV	GATK	15	8860068	8860068	ENSSSCG00000053109	15:8859716-8860216	15	8859716	8860216	51.3333	17.1982	22.7986	100	22.7986	14510	0.84873	15	8845101	8845207	U6	-0.0776648	0.987369	0.38963	0.942344	0	1	-0.677587	0.870755	GA	G	0/0	0/0	0/0	0/0	0/0	0/0	0/0	0/0	0/0	1/1	0/0	0/0	0/0	0/0	0/0	0/0	0/0	0/0
ML	SNV	GATK	15	107690047	107690047	ENSSSCG00000016123	15:107690029-107690529	15	107690029	107690529	184.833	3.81564	8.44061	15.8138	8.44061	192303	0.0221652	15	107882832	108910662	PARD3B	-0.327153	0.38784	-0.379428	0.361852	-0.272	0.424716	-0.219725	0.494508	C	T	0/0	0/0	0/0	0/0	0/0	0/0	0/1	0/0	0/0	1/1	0/0	0/0	0/0	0/0	0/0	0/0	0/0	1/1
ML	SNV	GATK	15	139918035	139918035	ENSSSCG00000016378	15:139917676-139918176	15	139917676	139918176	619.167	51.4537	80.0919	100	80.0919	608	0.39379	15	139890178	139917069	PASK	0.365786	0.464533	0.814875	0.138407	-0.0194712	0.965538	-0.468561	0.270072	G	A	0/0	0/0	0/0	0/0	0/0	0/0	0/0	0/0	0/0	1/1	0/0	0/0	0/0	0/0	0/0	0/0	0/0	0/0
ML	SNV	GATK	15	139921142	139921142	ENSSSCG00000016378	15:139920825-139921325	15	139920825	139921325	73.8333	51.4537	9.69648	100	9.69648	3757	0.047675	15	139890178	139917069	PASK	0.365786	0.464533	0.814875	0.138407	-0.0194712	0.965538	-0.468561	0.270072	G	A	0/0	0/0	0/0	0/0	0/0	0/0	0/0	0/0	0/0	1/1	0/0	0/0	0/0	0/0	0/0	0/0	0/0	0/0
ML	SNV	GATK	17	21850075	21850075	ENSSSCG00000007072	17:21850059-21850559	17	21850059	21850559	49.6667	3.59273	4.89023	63.8465	4.89023	80576	0.101066	17	21769484	21903264	SPTLC3	-0.227047	0.788618	-1.23573	0.183613	-1.06744	0.161002	-0.0587607	0.934961	C	T	0/0	0/0	0/0	0/0	0/0	0/0	0/0	0/0	0/0	1/1	0/0	0/0	0/0	0/0	0/0	0/0	0/0	0/0
ML	SNV	GATK	17	21850327	21850327	ENSSSCG00000007072	17:21850059-21850559	17	21850059	21850559	49.6667	3.59273	4.89023	63.8465	4.89023	80576	0.101066	17	21769484	21903264	SPTLC3	-0.227047	0.788618	-1.23573	0.183613	-1.06744	0.161002	-0.0587607	0.934961	C	T	0/0	0/0	0/0	0/0	0/0	0/0	0/0	0/0	0/0	1/1	0/0	0/0	0/0	0/0	0/0	0/0	0/0	0/0
ML	SNV	GATK	17	21850488	21850488	ENSSSCG00000007072	17:21850059-21850559	17	21850059	21850559	49.6667	3.59273	4.89023	63.8465	4.89023	80576	0.101066	17	21769484	21903264	SPTLC3	-0.227047	0.788618	-1.23573	0.183613	-1.06744	0.161002	-0.0587607	0.934961	A	G	0/0	0/0	0/0	0/0	0/0	0/0	0/0	0/0	0/0	1|1	0/0	0/0	0/0	0/0	0/0	0/0	0/0	0/0
ML	SNV	GATK	17	21850510	21850510	ENSSSCG00000007072	17:21850059-21850559	17	21850059	21850559	49.6667	3.59273	4.89023	63.8465	4.89023	80576	0.101066	17	21769484	21903264	SPTLC3	-0.227047	0.788618	-1.23573	0.183613	-1.06744	0.161002	-0.0587607	0.934961	C	T	0/0	0/0	0/0	0/0	0/0	0/0	0/0	0/0	0/0	1|1	0/0	0/0	0/0	0/0	0/0	0/0	0/0	0/0
ML	SNV	GATK	17	21850512	21850512	ENSSSCG00000007072	17:21850059-21850559	17	21850059	21850559	49.6667	3.59273	4.89023	63.8465	4.89023	80576	0.101066	17	21769484	21903264	SPTLC3	-0.227047	0.788618	-1.23573	0.183613	-1.06744	0.161002	-0.0587607	0.934961	G	T	0/0	0/0	0/0	0/0	0/0	0/0	0/0	0/0	0/0	1|1	0/0	0/0	0/0	0/0	0/0	0/0	0/0	0/0
ML	SNV	GATK	17	27263334	27263334	ENSSSCG00000007100	17:27262871-27263371	17	27262871	27263371	98	19.9369	27.9946	100	27.9946	6722	0.249009	17	27270093	27780526	SLC24A3	0.148638	0.783161	0.828315	0.16305	-0.309066	0.525373	-0.988743	0.031171	A	G	0/0	0/0	0/0	0/0	0/0	0/0	0/1	0/0	0/0	1/1	0/0	0/0	0/0	0/0	0/0	0/0	0/0	0/1
ML	SNV	GATK	17	28918019	28918019	ENSSSCG00000007108	17:28917688-28918188	17	28917688	28918188	132.833	5.37003	13.652	24.5	13.652	62140	0.0416883	17	28980328	29082392	KIZ	0.0867457	0.733458	-0.190425	0.495902	0.163997	0.473252	0.441168	0.0412173	T	C	0/0	0/0	0/0	0/0	0/0	0/0	0/0	0/0	0/0	1/1	0/0	0/0	0/0	0/0	0/0	0/0	0/0	0/0
ML	SNV	GATK	17	38869876	38869876	ENSSSCG00000055187	17:38869712-38870212	17	38869712	38870212	82.3333	6.79191	3.52822	72.8671	3.52822	94678	0.050972	17	38956673	38964890	CPNE1	-0.0267466	0.883606	0.0533845	0.790298	0.246065	0.134294	0.165934	0.284472	G	A	0/0	0/0	0/0	0/0	0/0	0/0	0/0	0/0	0/0	1/1	0/0	0/0	0/0	0/0	0/0	0/0	0/0	0/0
ML	SNV	GATK	17	38904223	38904223	ENSSSCG00000034045	17:38904189-38904689	17	38904189	38904689	78.3333	14.4598	6.71602	40.9376	6.71602	19067.5	0.0383968	17	38885117	38899138	ERGIC3	-0.205098	0.456528	-0.23338	0.440441	0.120628	0.626271	0.14891	0.524172	C	A	0/0	0/0	0/0	0/0	0/0	0/0	0/0	0/0	0/0	1/1	0/0	0/0	0/0	0/0	0/0	0/0	0/0	0/0
ML	SNV	GATK	17	38904223	38904223	ENSSSCG00000055187	17:38904189-38904689	17	38904189	38904689	78.3333	4.91467	2.28268	52.7271	2.28268	60201	0.0238629	17	38956673	38964890	CPNE1	-0.0267466	0.883606	0.0533845	0.790298	0.246065	0.134294	0.165934	0.284472	C	A	0/0	0/0	0/0	0/0	0/0	0/0	0/0	0/0	0/0	1/1	0/0	0/0	0/0	0/0	0/0	0/0	0/0	0/0
[truncated: 92 more columns]

## Sheet: Variants-GWAS-TF
Minipig breed in which variant was found in a ROHR and homozygous mutant	Type	Caller	Var_chr	Var_start	Var_end	Ref	Alt	TF_motif	TF_position_1	TF_orientation_1	TF_word_1	TF_position_2	TF_orientation_2	TF_word_2	TF_Pvalue_1	TF_Pvalue_2	TF_Fold_change	Ensembl.ID	PeakID	Peak_chr	Peak_start	Peak_end	signalValue	Contact	adaptedActivity	scaledContact	intergenicScore	TSS.dist	ABC.Score	Gene.chr	Gene.start.(bp)	Gene.end.(bp)	Gene.name	L2FC_AMAS	pvalue_AMAS	L2FC_AMMA	pvalue_AMMA	L2FC_MLMA	pvalue_MLMA	L2FC_MLAS	pvalue_MLAS
AM	SNV	GATK	1	265582618	265582618	G	A	MA1989.1 Bcl11B	-2	direct	aaGcaccacaaaac	-2	direct	aaAcaccacaaaac	0.000173308	2.49073e-05	6.95812	ENSSSCG00000005593	1:265582313-265582813	1	265582313	265582813	125.333	20.6404	20.0774	55.4392	20.0774	4609.5	0.0493771	1	265577704	265604502	OLFML2A	-0.0570502	0.921798	-0.249217	0.696152	0.215944	0.679467	0.408111	0.408069
AM	SNV	GATK	1	265582618	265582618	G	A	MA0002.2 Runx1	0	revcomp	ttttgtggtgC	0	revcomp	ttttgtggtgT	0.000432014	7.96318e-05	5.42515	ENSSSCG00000005593	1:265582313-265582813	1	265582313	265582813	125.333	20.6404	20.0774	55.4392	20.0774	4609.5	0.0493771	1	265577704	265604502	OLFML2A	-0.0570502	0.921798	-0.249217	0.696152	0.215944	0.679467	0.408111	0.408069
AM	SNV	GATK	1	265582618	265582618	G	A	MA0847.3 FOXD2	-9	direct	tctagtcaaGca	-9	direct	tctagtcaaAca	0.0043118	0.000314951	13.6904	ENSSSCG00000005593	1:265582313-265582813	1	265582313	265582813	125.333	20.6404	20.0774	55.4392	20.0774	4609.5	0.0493771	1	265577704	265604502	OLFML2A	-0.0570502	0.921798	-0.249217	0.696152	0.215944	0.679467	0.408111	0.408069
AM	SNV	GATK	1	265582677	265582677	A	G	MA0742.2 KLF12	-3	direct	tggActggg	-3	direct	tggGctggg	0.00473404	0.000354767	13.3441	ENSSSCG00000005593	1:265582313-265582813	1	265582313	265582813	125.333	20.6404	20.0774	55.4392	20.0774	4609.5	0.0493771	1	265577704	265604502	OLFML2A	-0.0570502	0.921798	-0.249217	0.696152	0.215944	0.679467	0.408111	0.408069
AM	SNV	GATK	1	265582677	265582677	A	G	MA1712.1 ZNF454	-17	direct	gggctcctggcagctggA	-17	direct	gggctcctggcagctggG	0.000103494	1.4837e-05	6.97537	ENSSSCG00000005593	1:265582313-265582813	1	265582313	265582813	125.333	20.6404	20.0774	55.4392	20.0774	4609.5	0.0493771	1	265577704	265604502	OLFML2A	-0.0570502	0.921798	-0.249217	0.696152	0.215944	0.679467	0.408111	0.408069
AM	SNV	GATK	1	265582677	265582677	A	G	MA1656.1 ZNF449	-8	revcomp	cccagTccagctgc	-8	revcomp	cccagCccagctgc	0.00194991	0.000160858	12.1219	ENSSSCG00000005593	1:265582313-265582813	1	265582313	265582813	125.333	20.6404	20.0774	55.4392	20.0774	4609.5	0.0493771	1	265577704	265604502	OLFML2A	-0.0570502	0.921798	-0.249217	0.696152	0.215944	0.679467	0.408111	0.408069
AM	SNV	GATK	1	265582677	265582677	A	G	MA0685.2 SP4	-3	direct	tggActggg	-3	direct	tggGctggg	0.00574875	0.000442505	12.9914	ENSSSCG00000005593	1:265582313-265582813	1	265582313	265582813	125.333	20.6404	20.0774	55.4392	20.0774	4609.5	0.0493771	1	265577704	265604502	OLFML2A	-0.0570502	0.921798	-0.249217	0.696152	0.215944	0.679467	0.408111	0.408069
AM	SNV	GATK	1	265582677	265582677	A	G	MA1959.1 KLF7	-3	direct	tggActggg	-3	direct	tggGctggg	0.00483704	0.000362396	13.3474	ENSSSCG00000005593	1:265582313-265582813	1	265582313	265582813	125.333	20.6404	20.0774	55.4392	20.0774	4609.5	0.0493771	1	265577704	265604502	OLFML2A	-0.0570502	0.921798	-0.249217	0.696152	0.215944	0.679467	0.408111	0.408069
AM	SNV	GATK	1	265582677	265582677	A	G	MA0493.2 KLF1	-3	direct	tggActggg	-3	direct	tggGctggg	0.00500488	0.000343323	14.5778	ENSSSCG00000005593	1:265582313-265582813	1	265582313	265582813	125.333	20.6404	20.0774	55.4392	20.0774	4609.5	0.0493771	1	265577704	265604502	OLFML2A	-0.0570502	0.921798	-0.249217	0.696152	0.215944	0.679467	0.408111	0.408069
AM	SNV	GATK	1	265582677	265582677	A	G	MA1513.1 KLF15	-4	revcomp	gcccagTccag	-4	revcomp	gcccagCccag	0.00285172	0.000211239	13.5	ENSSSCG00000005593	1:265582313-265582813	1	265582313	265582813	125.333	20.6404	20.0774	55.4392	20.0774	4609.5	0.0493771	1	265577704	265604502	OLFML2A	-0.0570502	0.921798	-0.249217	0.696152	0.215944	0.679467	0.408111	0.408069
AM	SNV	GATK	1	265582677	265582677	A	G	MA0599.1 KLF5	-3	revcomp	gcccagTcca	-3	revcomp	gcccagCcca	0.00435734	0.000279427	15.5939	ENSSSCG00000005593	1:265582313-265582813	1	265582313	265582813	125.333	20.6404	20.0774	55.4392	20.0774	4609.5	0.0493771	1	265577704	265604502	OLFML2A	-0.0570502	0.921798	-0.249217	0.696152	0.215944	0.679467	0.408111	0.408069
AM	SNV	GATK	1	265582677	265582677	A	G	MA1516.1 KLF3	-3	revcomp	ggcccagTcca	-3	revcomp	ggcccagCcca	0.00361586	0.000275373	13.1307	ENSSSCG00000005593	1:265582313-265582813	1	265582313	265582813	125.333	20.6404	20.0774	55.4392	20.0774	4609.5	0.0493771	1	265577704	265604502	OLFML2A	-0.0570502	0.921798	-0.249217	0.696152	0.215944	0.679467	0.408111	0.408069
AM	SNV	GATK	1	265593884	265593884	A	T	MA1969.1 THRA	-16	direct	gacatgatctcaattaAccccatc	-16	direct	gacatgatctcaattaTccccatc	0.000101236	0.000583988	0.173353	ENSSSCG00000005593	1:265593863-265594363	1	265593863	265594363	188.667	14.974	26.1199	40.2197	26.1199	16159.5	0.0466029	1	265577704	265604502	OLFML2A	-0.0570502	0.921798	-0.249217	0.696152	0.215944	0.679467	0.408111	0.408069
AM	SNV	GATK	1	265593884	265593884	A	T	MA0056.2 MZF1	-4	direct	attaAccccatcc	-4	direct	attaTccccatcc	0.00190428	8.46088e-05	22.5069	ENSSSCG00000005593	1:265593863-265594363	1	265593863	265594363	188.667	14.974	26.1199	40.2197	26.1199	16159.5	0.0466029	1	265577704	265604502	OLFML2A	-0.0570502	0.921798	-0.249217	0.696152	0.215944	0.679467	0.408111	0.408069
AM	SNV	GATK	1	265593884	265593884	A	T	MA0494.1 Nr1h3::Rxra	-12	direct	tgatctcaattaAccccat	-12	direct	tgatctcaattaTccccat	9.95736e-06	0.000126181	0.0789134	ENSSSCG00000005593	1:265593863-265594363	1	265593863	265594363	188.667	14.974	26.1199	40.2197	26.1199	16159.5	0.0466029	1	265577704	265604502	OLFML2A	-0.0570502	0.921798	-0.249217	0.696152	0.215944	0.679467	0.408111	0.408069
AM	SNV	GATK	1	265593884	265593884	A	T	MA0853.1 Alx4	-12	revcomp	ggggTtaattgagatca	-12	revcomp	ggggAtaattgagatca	0.000424336	0.00219598	0.193233	ENSSSCG00000005593	1:265593863-265594363	1	265593863	265594363	188.667	14.974	26.1199	40.2197	26.1199	16159.5	0.0466029	1	265577704	265604502	OLFML2A	-0.0570502	0.921798	-0.249217	0.696152	0.215944	0.679467	0.408111	0.408069
AM	SNV	GATK	1	265593884	265593884	A	T	MA0596.1 SREBF2	-3	revcomp	atggggTtaa	-3	revcomp	atggggAtaa	0.000422478	0.00569439	0.0741919	ENSSSCG00000005593	1:265593863-265594363	1	265593863	265594363	188.667	14.974	26.1199	40.2197	26.1199	16159.5	0.0466029	1	265577704	265604502	OLFML2A	-0.0570502	0.921798	-0.249217	0.696152	0.215944	0.679467	0.408111	0.408069
AM	SNV	GATK	12	36817273	36817273	G	A	MA1421.1 TCF7L1	-1	direct	tGagtccaaagg	-1	direct	tAagtccaaagg	0.000417233	7.05123e-05	5.91716	ENSSSCG00000022980	12:36816927-36817427	12	36816927	36817427	107	15.7816	31.2144	59.8557	31.2144	16900	0.0834565	12	36802354	36834327	TBX4	-0.136462	0.907488	-1.37177	0.283798	-1.0387	0.316447	0.19661	0.842437
AM	SNV	GATK	12	36817273	36817273	G	A	MA0114.4 HNF4A	-4	direct	tcatGagtccaaa	-4	direct	tcatAagtccaaa	0.00233941	0.000353456	6.61868	ENSSSCG00000022980	12:36816927-36817427	12	36816927	36817427	107	15.7816	31.2144	59.8557	31.2144	16900	0.0834565	12	36802354	36834327	TBX4	-0.136462	0.907488	-1.37177	0.283798	-1.0387	0.316447	0.19661	0.842437
AM	SNV	GATK	12	36817273	36817273	G	A	MA0729.1 RARA	-8	direct	aacatcatGagtccaaag	-8	direct	aacatcatAagtccaaag	0.00189041	0.000334199	5.65654	ENSSSCG00000022980	12:36816927-36817427	12	36816927	36817427	107	15.7816	31.2144	59.8557	31.2144	16900	0.0834565	12	36802354	36834327	TBX4	-0.136462	0.907488	-1.37177	0.283798	-1.0387	0.316447	0.19661	0.842437
AM	SNV	GATK	13	139925672	139925672	G	T	MA0482.2 GATA4	-3	revcomp	cgcattatCtag	-7	direct	ttccctaTataa	0.000401318	0.00250578	0.160157	ENSSSCG00000034616	13:139925565-139926065	13	139925565	139926065	110.667	29.8032	23.9449	100	23.9449	1716	0.25411	13	139927781	139948702	LRRC58	0.000436817	0.998674	-0.103569	0.719646	-0.202088	0.392525	-0.0980825	0.660291
AM	SNV	GATK	13	139925760	139925760	G	A	MA0139.1 CTCF	-12	direct	tggccacaagatGggcttc	-12	direct	tggccacaagatAggcttc	7.04768e-05	0.000986724	0.0714251	ENSSSCG00000034616	13:139925565-139926065	13	139925565	139926065	110.667	29.8032	23.9449	100	23.9449	1716	0.25411	13	139927781	139948702	LRRC58	0.000436817	0.998674	-0.103569	0.719646	-0.202088	0.392525	-0.0980825	0.660291
AM	SNV	GATK	13	139925760	139925760	G	A	MA1656.1 ZNF449	-6	revcomp	tgaagccCatcttg	-6	revcomp	tgaagccTatcttg	0.000152528	0.0021329	0.0715123	ENSSSCG00000034616	13:139925565-139926065	13	139925565	139926065	110.667	29.8032	23.9449	100	23.9449	1716	0.25411	13	139927781	139948702	LRRC58	0.000436817	0.998674	-0.103569	0.719646	-0.202088	0.392525	-0.0980825	0.660291
AM	SNV	GATK	13	139925760	139925760	G	A	MA1930.1 CTCF	-28	direct	nnncctctccgacagctggccacaagatGggcttc	-28	direct	nnncctctccgacagctggccacaagatAggcttc	8.35825e-05	0.000764158	0.109379	ENSSSCG00000034616	13:139925565-139926065	13	139925565	139926065	110.667	29.8032	23.9449	100	23.9449	1716	0.25411	13	139927781	139948702	LRRC58	0.000436817	0.998674	-0.103569	0.719646	-0.202088	0.392525	-0.0980825	0.660291
AM	SNV	GATK	13	139925760	139925760	G	A	MA1601.2 ZNF75D	0	revcomp	gtgatgaagccC	0	revcomp	gtgatgaagccT	0.00208908	0.000384212	5.43733	ENSSSCG00000034616	13:139925565-139926065	13	139925565	139926065	110.667	29.8032	23.9449	100	23.9449	1716	0.25411	13	139927781	139948702	LRRC58	0.000436817	0.998674	-0.103569	0.719646	-0.202088	0.392525	-0.0980825	0.660291
AM	SNV	GATK	13	139925760	139925760	G	A	MA0095.3 Yy1	-8	direct	cacaagatGggc	-8	direct	cacaagatAggc	0.000149846	0.00243521	0.0615332	ENSSSCG00000034616	13:139925565-139926065	13	139925565	139926065	110.667	29.8032	23.9449	100	23.9449	1716	0.25411	13	139927781	139948702	LRRC58	0.000436817	0.998674	-0.103569	0.719646	-0.202088	0.392525	-0.0980825	0.660291
AM	SNV	GATK	13	139927378	139927378	C	T	MA0114.4 HNF4A	-8	direct	actaaagtCctga	-8	direct	actaaagtTctga	0.000184909	0.00142226	0.130011	ENSSSCG00000034616	13:139927332-139927832	13	139927332	139927832	273.833	29.8032	59.249	100	59.249	0	0.628767	13	139927781	139948702	LRRC58	0.000436817	0.998674	-0.103569	0.719646	-0.202088	0.392525	-0.0980825	0.660291
AM	SNV	GATK	13	139927402	139927402	G	A	MA1616.1 Prdm15	-5	direct	ccgcaGaccaggggc	-5	direct	ccgcaAaccaggggc	0.00311117	0.000431257	7.21419	ENSSSCG00000034616	13:139927332-139927832	13	139927332	139927832	273.833	29.8032	59.249	100	59.249	0	0.628767	13	139927781	139948702	LRRC58	0.000436817	0.998674	-0.103569	0.719646	-0.202088	0.392525	-0.0980825	0.660291
AM	SNV	GATK	13	139927402	139927402	G	A	MA0865.2 E2F8	-8	direct	ctcccgcaGacc	-8	direct	ctcccgcaAacc	0.00315821	0.000333428	9.47193	ENSSSCG00000034616	13:139927332-139927832	13	139927332	139927832	273.833	29.8032	59.249	100	59.249	0	0.628767	13	139927781	139948702	LRRC58	0.000436817	0.998674	-0.103569	0.719646	-0.202088	0.392525	-0.0980825	0.660291
AM	SNV	GATK	13	139927402	139927402	G	A	MA0073.1 RREB1	-5	direct	ccgcaGaccaggggccccca	-5	direct	ccgcaAaccaggggccccca	0.000436428	5.02441e-05	8.68615	ENSSSCG00000034616	13:139927332-139927832	13	139927332	139927832	273.833	29.8032	59.249	100	59.249	0	0.628767	13	139927781	139948702	LRRC58	0.000436817	0.998674	-0.103569	0.719646	-0.202088	0.392525	-0.0980825	0.660291
AM	SNV	GATK	13	139927522	139927522	G	C	MA0759.2 ELK3	-10	direct	cctggaattcG	-7	revcomp	cccGgaattcc	0.00407076	0.000349045	11.6626	ENSSSCG00000034616	13:139927332-139927832	13	139927332	139927832	273.833	29.8032	59.249	100	59.249	0	0.628767	13	139927781	139948702	LRRC58	0.000436817	0.998674	-0.103569	0.719646	-0.202088	0.392525	-0.0980825	0.660291
AM	SNV	GATK	13	139927522	139927522	G	C	MA0475.2 FLI1	-6	revcomp	cccCgaattc	-6	revcomp	cccGgaattc	0.00596428	0.000429153	13.8978	ENSSSCG00000034616	13:139927332-139927832	13	139927332	139927832	273.833	29.8032	59.249	100	59.249	0	0.628767	13	139927781	139948702	LRRC58	0.000436817	0.998674	-0.103569	0.719646	-0.202088	0.392525	-0.0980825	0.660291
AM	SNV	GATK	13	139927522	139927522	G	C	MA0677.1 Nr2f6	-2	direct	tcGgggacaggtca	-2	direct	tcCgggacaggtca	0.000332899	0.0023687	0.140541	ENSSSCG00000034616	13:139927332-139927832	13	139927332	139927832	273.833	29.8032	59.249	100	59.249	0	0.628767	13	139927781	139948702	LRRC58	0.000436817	0.998674	-0.103569	0.719646	-0.202088	0.392525	-0.0980825	0.660291
AM	SNV	GATK	13	139927522	139927522	G	C	MA0076.2 ELK4	-10	revcomp	Cgaattccagg	-7	direct	ggaattcCggg	0.00229931	0.00033021	6.96318	ENSSSCG00000034616	13:139927332-139927832	13	139927332	139927832	273.833	29.8032	59.249	100	59.249	0	0.628767	13	139927781	139948702	LRRC58	0.000436817	0.998674	-0.103569	0.719646	-0.202088	0.392525	-0.0980825	0.660291
AM	SNV	GATK	13	139927522	139927522	G	C	MA1148.1 PPARA::RXRA	-5	direct	aattcGgggacaggtcac	-5	direct	aattcCgggacaggtcac	6.49843e-06	0.000135698	0.0478888	ENSSSCG00000034616	13:139927332-139927832	13	139927332	139927832	273.833	29.8032	59.249	100	59.249	0	0.628767	13	139927781	139948702	LRRC58	0.000436817	0.998674	-0.103569	0.719646	-0.202088	0.392525	-0.0980825	0.660291
AM	SNV	GATK	13	139927522	139927522	G	C	MA0731.1 BCL6B	-7	revcomp	acctgtcccCgaattcc	-7	revcomp	acctgtcccGgaattcc	0.000795017	0.000114555	6.94003	ENSSSCG00000034616	13:139927332-139927832	13	139927332	139927832	273.833	29.8032	59.249	100	59.249	0	0.628767	13	139927781	139948702	LRRC58	0.000436817	0.998674	-0.103569	0.719646	-0.202088	0.392525	-0.0980825	0.660291
AM	SNV	GATK	13	139927522	139927522	G	C	MA0764.3 ETV4	-6	revcomp	cccCgaattc	-6	revcomp	cccGgaattc	0.00635815	0.000413895	15.3618	ENSSSCG00000034616	13:139927332-139927832	13	139927332	139927832	273.833	29.8032	59.249	100	59.249	0	0.628767	13	139927781	139948702	LRRC58	0.000436817	0.998674	-0.103569	0.719646	-0.202088	0.392525	-0.0980825	0.660291
AM	SNV	GATK	13	139927522	139927522	G	C	MA0763.1 ETV3	-6	revcomp	cccCgaattc	-6	revcomp	cccGgaattc	0.00631619	0.000491142	12.8602	ENSSSCG00000034616	13:139927332-139927832	13	139927332	139927832	273.833	29.8032	59.249	100	59.249	0	0.628767	13	139927781	139948702	LRRC58	0.000436817	0.998674	-0.103569	0.719646	-0.202088	0.392525	-0.0980825	0.660291
AM	SNV	GATK	13	139927522	139927522	G	C	MA0106.3 TP53	-7	direct	ggaattcGgggacaggtc	-7	direct	ggaattcCgggacaggtc	0.0018349	0.000332222	5.52311	ENSSSCG00000034616	13:139927332-139927832	13	139927332	139927832	273.833	29.8032	59.249	100	59.249	0	0.628767	13	139927781	139948702	LRRC58	0.000436817	0.998674	-0.103569	0.719646	-0.202088	0.392525	-0.0980825	0.660291
AM	SNV	GATK	13	139927522	139927522	G	C	MA1537.1 NR2F1	-2	direct	tcGgggacaggtcac	-2	direct	tcCgggacaggtcac	0.000444053	0.003357	0.132277	ENSSSCG00000034616	13:139927332-139927832	13	139927332	139927832	273.833	29.8032	59.249	100	59.249	0	0.628767	13	139927781	139948702	LRRC58	0.000436817	0.998674	-0.103569	0.719646	-0.202088	0.392525	-0.0980825	0.660291
AM	SNV	GATK	13	139927522	139927522	G	C	MA0463.2 BCL6	-5	revcomp	gacctgtcccCgaatt	-5	revcomp	gacctgtcccGgaatt	0.00312605	0.000424473	7.36453	ENSSSCG00000034616	13:139927332-139927832	13	139927332	139927832	273.833	29.8032	59.249	100	59.249	0	0.628767	13	139927781	139948702	LRRC58	0.000436817	0.998674	-0.103569	0.719646	-0.202088	0.392525	-0.0980825	0.660291
AM	SNV	GATK	13	139927522	139927522	G	C	MA0065.2 Pparg::Rxra	-3	direct	ttcGgggacaggtca	-3	direct	ttcCgggacaggtca	2.45851e-05	0.000375208	0.0655237	ENSSSCG00000034616	13:139927332-139927832	13	139927332	139927832	273.833	29.8032	59.249	100	59.249	0	0.628767	13	139927781	139948702	LRRC58	0.000436817	0.998674	-0.103569	0.719646	-0.202088	0.392525	-0.0980825	0.660291
AM	SNV	GATK	13	139927522	139927522	G	C	MA0641.1 ELF4	-6	revcomp	gtcccCgaattc	-6	revcomp	gtcccGgaattc	0.00301606	0.000278771	10.8191	ENSSSCG00000034616	13:139927332-139927832	13	139927332	139927832	273.833	29.8032	59.249	100	59.249	0	0.628767	13	139927781	139948702	LRRC58	0.000436817	0.998674	-0.103569	0.719646	-0.202088	0.392525	-0.0980825	0.660291
AM	SNV	GATK	13	139927522	139927522	G	C	MA1483.2 ELF2	-6	revcomp	gtcccCgaattc	-6	revcomp	gtcccGgaattc	0.00267184	0.000160336	16.6639	ENSSSCG00000034616	13:139927332-139927832	13	139927332	139927832	273.833	29.8032	59.249	100	59.249	0	0.628767	13	139927781	139948702	LRRC58	0.000436817	0.998674	-0.103569	0.719646	-0.202088	0.392525	-0.0980825	0.660291
AM	SNV	GATK	14	123927880	123927880	G	A	MA1489.1 FOXN3	-6	revcomp	gCaaagaa	-6	revcomp	gTaaagaa	0.00422668	0.00038147	11.08	ENSSSCG00000010647	14:123927643-123928143	14	123927643	123928143	99.8333	3.99772	10.1806	19.0846	10.1806	472187	0.0264464	14	124400330	124401739	ADRB1	-0.0639912	0.939739	-0.345125	0.711577	-0.699153	0.366408	-0.418019	0.569084
AM	SNV	GATK	14	123927880	123927880	G	A	MA0852.2 FOXK1	-9	revcomp	ttggCaaagaagcc	-9	revcomp	ttggTaaagaagcc	0.0020779	0.000143535	14.4766	ENSSSCG00000010647	14:123927643-123928143	14	123927643	123928143	99.8333	3.99772	10.1806	19.0846	10.1806	472187	0.0264464	14	124400330	124401739	ADRB1	-0.0639912	0.939739	-0.345125	0.711577	-0.699153	0.366408	-0.418019	0.569084
AM	SNV	GATK	14	123927880	123927880	G	A	MA0030.1 FOXF2	-7	revcomp	gcttggCaaagaag	-7	revcomp	gcttggTaaagaag	0.00571307	0.000499159	11.4454	ENSSSCG00000010647	14:123927643-123928143	14	123927643	123928143	99.8333	3.99772	10.1806	19.0846	10.1806	472187	0.0264464	14	124400330	124401739	ADRB1	-0.0639912	0.939739	-0.345125	0.711577	-0.699153	0.366408	-0.418019	0.569084
AM	SNV	GATK	14	123927880	123927880	G	A	MA0031.1 FOXD1	-6	revcomp	gCaaagaa	-6	revcomp	gTaaagaa	0.00657654	0.000396729	16.5769	ENSSSCG00000010647	14:123927643-123928143	14	123927643	123928143	99.8333	3.99772	10.1806	19.0846	10.1806	472187	0.0264464	14	124400330	124401739	ADRB1	-0.0639912	0.939739	-0.345125	0.711577	-0.699153	0.366408	-0.418019	0.569084
AM	SNV	GATK	14	123927880	123927880	G	A	MA0851.1 Foxj3	-10	revcomp	gcttggCaaagaagccc	-10	revcomp	gcttggTaaagaagccc	0.00497373	0.0004244	11.7194	ENSSSCG00000010647	14:123927643-123928143	14	123927643	123928143	99.8333	3.99772	10.1806	19.0846	10.1806	472187	0.0264464	14	124400330	124401739	ADRB1	-0.0639912	0.939739	-0.345125	0.711577	-0.699153	0.366408	-0.418019	0.569084
AM	SNV	GATK	14	123927880	123927880	G	A	MA0042.2 FOXI1	-5	revcomp	gCaaaga	-5	revcomp	gTaaaga	0.00610352	0.000366211	16.6667	ENSSSCG00000010647	14:123927643-123928143	14	123927643	123928143	99.8333	3.99772	10.1806	19.0846	10.1806	472187	0.0264464	14	124400330	124401739	ADRB1	-0.0639912	0.939739	-0.345125	0.711577	-0.699153	0.366408	-0.418019	0.569084
AM	SNV	GATK	14	123927880	123927880	G	A	MA0850.1 FOXP3	-5	revcomp	gCaaaga	-5	revcomp	gTaaaga	0.00286865	0.000488281	5.875	ENSSSCG00000010647	14:123927643-123928143	14	123927643	123928143	99.8333	3.99772	10.1806	19.0846	10.1806	472187	0.0264464	14	124400330	124401739	ADRB1	-0.0639912	0.939739	-0.345125	0.711577	-0.699153	0.366408	-0.418019	0.569084
AM	SNV	GATK	14	123927880	123927880	G	A	MA0161.2 NFIC	-3	revcomp	ggcttggCaaa	-3	revcomp	ggcttggTaaa	5.88894e-05	0.00117373	0.0501727	ENSSSCG00000010647	14:123927643-123928143	14	123927643	123928143	99.8333	3.99772	10.1806	19.0846	10.1806	472187	0.0264464	14	124400330	124401739	ADRB1	-0.0639912	0.939739	-0.345125	0.711577	-0.699153	0.366408	-0.418019	0.569084
AM	SNV	GATK	14	123927880	123927880	G	A	MA0157.3 Foxo3	-8	revcomp	tggCaaagaagc	-8	revcomp	tggTaaagaagc	0.00400448	0.000366509	10.926	ENSSSCG00000010647	14:123927643-123928143	14	123927643	123928143	99.8333	3.99772	10.1806	19.0846	10.1806	472187	0.0264464	14	124400330	124401739	ADRB1	-0.0639912	0.939739	-0.345125	0.711577	-0.699153	0.366408	-0.418019	0.569084
AM	SNV	GATK	14	123927880	123927880	G	A	MA0614.1 Foxj2	-6	revcomp	gCaaagaa	-6	revcomp	gTaaagaa	0.00495911	0.00038147	13	ENSSSCG00000010647	14:123927643-123928143	14	123927643	123928143	99.8333	3.99772	10.1806	19.0846	10.1806	472187	0.0264464	14	124400330	124401739	ADRB1	-0.0639912	0.939739	-0.345125	0.711577	-0.699153	0.366408	-0.418019	0.569084
AM	SNV	GATK	14	123927880	123927880	G	A	MA1726.1 ZNF331	-4	direct	ctttGccaagccct	-4	direct	ctttAccaagccct	0.000200093	0.00255049	0.0784528	ENSSSCG00000010647	14:123927643-123928143	14	123927643	123928143	99.8333	3.99772	10.1806	19.0846	10.1806	472187	0.0264464	14	124400330	124401739	ADRB1	-0.0639912	0.939739	-0.345125	0.711577	-0.699153	0.366408	-0.418019	0.569084
AM	SNV	GATK	14	123927880	123927880	G	A	MA0671.1 NFIX	-3	direct	tttGccaag	-3	direct	tttAccaag	0.000167847	0.00457764	0.0366667	ENSSSCG00000010647	14:123927643-123928143	14	123927643	123928143	99.8333	3.99772	10.1806	19.0846	10.1806	472187	0.0264464	14	124400330	124401739	ADRB1	-0.0639912	0.939739	-0.345125	0.711577	-0.699153	0.366408	-0.418019	0.569084
AM	SNV	GATK	14	123927880	123927880	G	A	MA0670.1 NFIA	-3	direct	tttGccaagc	-3	direct	tttAccaagc	0.000156403	0.00305939	0.0511222	ENSSSCG00000010647	14:123927643-123928143	14	123927643	123928143	99.8333	3.99772	10.1806	19.0846	10.1806	472187	0.0264464	14	124400330	124401739	ADRB1	-0.0639912	0.939739	-0.345125	0.711577	-0.699153	0.366408	-0.418019	0.569084
AM	SNV	GATK	14	124173612	124173612	G	A	MA0014.3 PAX5	-8	revcomp	gggCgtggccca	-8	revcomp	gggTgtggccca	0.000150025	0.00181258	0.0827688	ENSSSCG00000010645	14:124173459-124173959	14	124173459	124173959	113.333	9.379	17.2181	27.8319	17.2181	10939	0.0570277	14	124162521	124236814	NHLRC2	0.0136905	0.968467	0.287112	0.450934	0.0589763	0.850126	-0.214446	0.465997
AM	SNV	GATK	14	124173612	124173612	G	A	MA0747.1 SP8	-5	direct	gccacGcccacc	-5	direct	gccacAcccacc	2.98023e-07	5.06639e-06	0.0588235	ENSSSCG00000010645	14:124173459-124173959	14	124173459	124173959	113.333	9.379	17.2181	27.8319	17.2181	10939	0.0570277	14	124162521	124236814	NHLRC2	0.0136905	0.968467	0.287112	0.450934	0.0589763	0.850126	-0.214446	0.465997
AM	SNV	GATK	14	124173612	124173612	G	A	MA1512.1 KLF11	-5	direct	gccacGcccac	-5	direct	gccacAcccac	2.38419e-07	3.8147e-06	0.0625	ENSSSCG00000010645	14:124173459-124173959	14	124173459	124173959	113.333	9.379	17.2181	27.8319	17.2181	10939	0.0570277	14	124162521	124236814	NHLRC2	0.0136905	0.968467	0.287112	0.450934	0.0589763	0.850126	-0.214446	0.465997
AM	SNV	GATK	14	124173612	124173612	G	A	MA0685.2 SP4	-4	revcomp	tgggCgtgg	-4	revcomp	tgggTgtgg	0.000221252	0.0020752	0.106618	ENSSSCG00000010645	14:124173459-124173959	14	124173459	124173959	113.333	9.379	17.2181	27.8319	17.2181	10939	0.0570277	14	124162521	124236814	NHLRC2	0.0136905	0.968467	0.287112	0.450934	0.0589763	0.850126	-0.214446	0.465997
AM	SNV	GATK	14	124173612	124173612	G	A	MA0742.2 KLF12	-4	revcomp	tgggCgtgg	-4	revcomp	tgggTgtgg	0.000110626	0.00144958	0.0763158	ENSSSCG00000010645	14:124173459-124173959	14	124173459	124173959	113.333	9.379	17.2181	27.8319	17.2181	10939	0.0570277	14	124162521	124236814	NHLRC2	0.0136905	0.968467	0.287112	0.450934	0.0589763	0.850126	-0.214446	0.465997
AM	SNV	GATK	14	124173612	124173612	G	A	MA0657.1 KLF13	-7	direct	gggccacGcccacctctg	-7	direct	gggccacAcccacctctg	3.09186e-06	5.88716e-05	0.0525187	ENSSSCG00000010645	14:124173459-124173959	14	124173459	124173959	113.333	9.379	17.2181	27.8319	17.2181	10939	0.0570277	14	124162521	124236814	NHLRC2	0.0136905	0.968467	0.287112	0.450934	0.0589763	0.850126	-0.214446	0.465997
AM	SNV	GATK	14	124173612	124173612	G	A	MA1107.2 KLF9	-7	direct	gggccacGcccacctc	-7	direct	gggccacAcccacctc	8.50996e-07	5.21541e-08	16.317	ENSSSCG00000010645	14:124173459-124173959	14	124173459	124173959	113.333	9.379	17.2181	27.8319	17.2181	10939	0.0570277	14	124162521	124236814	NHLRC2	0.0136905	0.968467	0.287112	0.450934	0.0589763	0.850126	-0.214446	0.465997
AM	SNV	GATK	14	124173612	124173612	G	A	MA1959.1 KLF7	-4	revcomp	tgggCgtgg	-4	revcomp	tgggTgtgg	5.72205e-05	0.000431061	0.132743	ENSSSCG00000010645	14:124173459-124173959	14	124173459	124173959	113.333	9.379	17.2181	27.8319	17.2181	10939	0.0570277	14	124162521	124236814	NHLRC2	0.0136905	0.968467	0.287112	0.450934	0.0589763	0.850126	-0.214446	0.465997
AM	SNV	GATK	14	124173612	124173612	G	A	MA1515.1 KLF2	-6	direct	ggccacGccca	-6	direct	ggccacAccca	1.66893e-06	1.09673e-05	0.152174	ENSSSCG00000010645	14:124173459-124173959	14	124173459	124173959	113.333	9.379	17.2181	27.8319	17.2181	10939	0.0570277	14	124162521	124236814	NHLRC2	0.0136905	0.968467	0.287112	0.450934	0.0589763	0.850126	-0.214446	0.465997
AM	SNV	GATK	14	124173612	124173612	G	A	MA0039.4 KLF4	-6	direct	ggccacGcccac	-6	direct	ggccacAcccac	0.000384033	1.91927e-05	20.0093	ENSSSCG00000010645	14:124173459-124173959	14	124173459	124173959	113.333	9.379	17.2181	27.8319	17.2181	10939	0.0570277	14	124162521	124236814	NHLRC2	0.0136905	0.968467	0.287112	0.450934	0.0589763	0.850126	-0.214446	0.465997
AM	SNV	GATK	14	124173612	124173612	G	A	MA1511.2 KLF10	-4	revcomp	tgggCgtgg	-4	revcomp	tgggTgtgg	0.000118256	0.00100708	0.117424	ENSSSCG00000010645	14:124173459-124173959	14	124173459	124173959	113.333	9.379	17.2181	27.8319	17.2181	10939	0.0570277	14	124162521	124236814	NHLRC2	0.0136905	0.968467	0.287112	0.450934	0.0589763	0.850126	-0.214446	0.465997
AM	SNV	GATK	14	124173612	124173612	G	A	MA1513.1 KLF15	-5	direct	gccacGcccac	-5	direct	gccacAcccac	0.000115156	0.00178385	0.0645549	ENSSSCG00000010645	14:124173459-124173959	14	124173459	124173959	113.333	9.379	17.2181	27.8319	17.2181	10939	0.0570277	14	124162521	124236814	NHLRC2	0.0136905	0.968467	0.287112	0.450934	0.0589763	0.850126	-0.214446	0.465997
AM	SNV	GATK	14	124173612	124173612	G	A	MA0741.1 KLF16	-5	direct	gccacGcccac	-5	direct	gccacAcccac	2.14577e-06	1.33514e-05	0.160714	ENSSSCG00000010645	14:124173459-124173959	14	124173459	124173959	113.333	9.379	17.2181	27.8319	17.2181	10939	0.0570277	14	124162521	124236814	NHLRC2	0.0136905	0.968467	0.287112	0.450934	0.0589763	0.850126	-0.214446	0.465997
AM	SNV	GATK	14	124173612	124173612	G	A	MA1516.1 KLF3	-6	direct	ggccacGccca	-6	direct	ggccacAccca	1.19209e-06	2.81334e-05	0.0423729	ENSSSCG00000010645	14:124173459-124173959	14	124173459	124173959	113.333	9.379	17.2181	27.8319	17.2181	10939	0.0570277	14	124162521	124236814	NHLRC2	0.0136905	0.968467	0.287112	0.450934	0.0589763	0.850126	-0.214446	0.465997
AM	SNV	GATK	14	124173612	124173612	G	A	MA1517.1 KLF6	-6	direct	ggccacGccca	-6	direct	ggccacAccca	9.53674e-07	8.58307e-06	0.111111	ENSSSCG00000010645	14:124173459-124173959	14	124173459	124173959	113.333	9.379	17.2181	27.8319	17.2181	10939	0.0570277	14	124162521	124236814	NHLRC2	0.0136905	0.968467	0.287112	0.450934	0.0589763	0.850126	-0.214446	0.465997
AM	SNV	GATK	14	124173612	124173612	G	A	MA0746.2 SP3	-6	direct	ggccacGcccacc	-6	direct	ggccacAcccacc	7.45058e-08	4.54485e-06	0.0163934	ENSSSCG00000010645	14:124173459-124173959	14	124173459	124173959	113.333	9.379	17.2181	27.8319	17.2181	10939	0.0570277	14	124162521	124236814	NHLRC2	0.0136905	0.968467	0.287112	0.450934	0.0589763	0.850126	-0.214446	0.465997
AM	SNV	GATK	14	124173612	124173612	G	A	MA0632.2 TCFL5	-4	direct	ccacGcccac	-4	direct	ccacAcccac	0.000282288	0.00428867	0.0658217	ENSSSCG00000010645	14:124173459-124173959	14	124173459	124173959	113.333	9.379	17.2181	27.8319	17.2181	10939	0.0570277	14	124162521	124236814	NHLRC2	0.0136905	0.968467	0.287112	0.450934	0.0589763	0.850126	-0.214446	0.465997
AM	SNV	GATK	14	124173612	124173612	G	A	MA0162.4 EGR1	-4	direct	ccacGcccacctct	-4	direct	ccacAcccacctct	6.58259e-05	0.000410862	0.160214	ENSSSCG00000010645	14:124173459-124173959	14	124173459	124173959	113.333	9.379	17.2181	27.8319	17.2181	10939	0.0570277	14	124162521	124236814	NHLRC2	0.0136905	0.968467	0.287112	0.450934	0.0589763	0.850126	-0.214446	0.465997
AM	SNV	GATK	16	51325013	51325013	T	G	MA1653.1 ZNF148	-2	revcomp	ttctcctccAca	-2	revcomp	ttctcctccCca	0.00130439	0.000147998	8.81353	ENSSSCG00000016988	16:51324739-51325239	16	51324739	51325239	102.833	29.0395	38.2123	81.3762	38.2123	4930	0.0606355	16	51285493	51330169	ERGIC1	0.161566	0.298196	0.000819728	0.996164	-0.198316	0.155635	-0.037569	0.776054
AM	SNV	GATK	16	51325013	51325013	T	G	MA0083.3 SRF	-12	revcomp	tccAcacagaaggaga	-12	revcomp	tccCcacagaaggaga	0.00294838	0.000374789	7.86679	ENSSSCG00000016988	16:51324739-51325239	16	51324739	51325239	102.833	29.0395	38.2123	81.3762	38.2123	4930	0.0606355	16	51285493	51330169	ERGIC1	0.161566	0.298196	0.000819728	0.996164	-0.198316	0.155635	-0.037569	0.776054
AM	SNV	GATK	16	51325013	51325013	T	G	MA0528.2 ZNF263	-3	direct	gtgTggaggaga	-3	direct	gtgGggaggaga	0.000143349	4.41074e-06	32.5	ENSSSCG00000016988	16:51324739-51325239	16	51324739	51325239	102.833	29.0395	38.2123	81.3762	38.2123	4930	0.0606355	16	51285493	51330169	ERGIC1	0.161566	0.298196	0.000819728	0.996164	-0.198316	0.155635	-0.037569	0.776054
AM	SNV	GATK	16	51325013	51325013	T	G	MA0599.1 KLF5	-1	revcomp	tctcctccAc	-1	revcomp	tctcctccCc	0.00554562	0.000406265	13.6502	ENSSSCG00000016988	16:51324739-51325239	16	51324739	51325239	102.833	29.0395	38.2123	81.3762	38.2123	4930	0.0606355	16	51285493	51330169	ERGIC1	0.161566	0.298196	0.000819728	0.996164	-0.198316	0.155635	-0.037569	0.776054
AM	SNV	GATK	16	51325013	51325013	T	G	MA1959.1 KLF7	-1	direct	gTggaggag	-1	direct	gGggaggag	0.00590897	0.000434875	13.5877	ENSSSCG00000016988	16:51324739-51325239	16	51324739	51325239	102.833	29.0395	38.2123	81.3762	38.2123	4930	0.0606355	16	51285493	51330169	ERGIC1	0.161566	0.298196	0.000819728	0.996164	-0.198316	0.155635	-0.037569	0.776054
AM	SNV	GATK	16	51325013	51325013	T	G	MA0079.5 SP1	-1	direct	gTggaggag	-1	direct	gGggaggag	0.00115585	5.72205e-05	20.2	ENSSSCG00000016988	16:51324739-51325239	16	51324739	51325239	102.833	29.0395	38.2123	81.3762	38.2123	4930	0.0606355	16	51285493	51330169	ERGIC1	0.161566	0.298196	0.000819728	0.996164	-0.198316	0.155635	-0.037569	0.776054
AM	SNV	GATK	16	51325013	51325013	T	G	MA0753.2 ZNF740	-1	revcomp	tcttctcctccAc	-3	revcomp	ttctcctccCcac	0.00306411	0.000492275	6.22439	ENSSSCG00000016988	16:51324739-51325239	16	51324739	51325239	102.833	29.0395	38.2123	81.3762	38.2123	4930	0.0606355	16	51285493	51330169	ERGIC1	0.161566	0.298196	0.000819728	0.996164	-0.198316	0.155635	-0.037569	0.776054
AM	SNV	GATK	16	51325013	51325013	T	G	MA0685.2 SP4	-1	direct	gTggaggag	-1	direct	gGggaggag	0.00112915	4.95911e-05	22.7692	ENSSSCG00000016988	16:51324739-51325239	16	51324739	51325239	102.833	29.0395	38.2123	81.3762	38.2123	4930	0.0606355	16	51285493	51330169	ERGIC1	0.161566	0.298196	0.000819728	0.996164	-0.198316	0.155635	-0.037569	0.776054
AM	SNV	GATK	16	51325013	51325013	T	G	MA1511.2 KLF10	-1	direct	gTggaggag	-1	direct	gGggaggag	0.00629044	0.000453949	13.8571	ENSSSCG00000016988	16:51324739-51325239	16	51324739	51325239	102.833	29.0395	38.2123	81.3762	38.2123	4930	0.0606355	16	51285493	51330169	ERGIC1	0.161566	0.298196	0.000819728	0.996164	-0.198316	0.155635	-0.037569	0.776054
AM	SNV	GATK	16	51325013	51325013	T	G	MA1630.2 ZNF281	-2	direct	tgTggaggagaa	-2	direct	tgGggaggagaa	0.00251138	0.000256479	9.79177	ENSSSCG00000016988	16:51324739-51325239	16	51324739	51325239	102.833	29.0395	38.2123	81.3762	38.2123	4930	0.0606355	16	51285493	51330169	ERGIC1	0.161566	0.298196	0.000819728	0.996164	-0.198316	0.155635	-0.037569	0.776054
AM	SNV	GATK	16	51325013	51325013	T	G	MA0516.3 SP2	-1	direct	gTggaggag	-1	direct	gGggaggag	0.00409317	0.000457764	8.94167	ENSSSCG00000016988	16:51324739-51325239	16	51324739	51325239	102.833	29.0395	38.2123	81.3762	38.2123	4930	0.0606355	16	51285493	51330169	ERGIC1	0.161566	0.298196	0.000819728	0.996164	-0.198316	0.155635	-0.037569	0.776054
AM	SNV	GATK	16	53586366	53586366	G	A	MA0003.4 TFAP2A	-7	revcomp	gcagccCaaggtct	-7	revcomp	gcagccTaaggtct	0.00396311	0.00047845	8.28323	ENSSSCG00000017018	16:53585961-53586461	16	53585961	53586461	85	1.44912	2.48317	97.6558	2.48317	2.56697e+06	0.0664774	16	55625320	56620257	TENM2	1.24215	0.250969	0.063868	0.956807	0.416246	0.66382	1.59453	0.0803496
AM	SNV	GATK	16	53586366	53586366	G	A	MA1656.1 ZNF449	-6	revcomp	cgcagccCaaggtc	-6	revcomp	cgcagccTaaggtc	0.000393767	0.00457049	0.0861542	ENSSSCG00000017018	16:53585961-53586461	16	53585961	53586461	85	1.44912	2.48317	97.6558	2.48317	2.56697e+06	0.0664774	16	55625320	56620257	TENM2	1.24215	0.250969	0.063868	0.956807	0.416246	0.66382	1.59453	0.0803496
AM	SNV	GATK	16	53586366	53586366	G	A	MA0592.3 ESRRA	-9	revcomp	gccCaaggtctgg	-9	revcomp	gccTaaggtctgg	0.000179008	0.00165269	0.108313	ENSSSCG00000017018	16:53585961-53586461	16	53585961	53586461	85	1.44912	2.48317	97.6558	2.48317	2.56697e+06	0.0664774	16	55625320	56620257	TENM2	1.24215	0.250969	0.063868	0.956807	0.416246	0.66382	1.59453	0.0803496
AM	SNV	GATK	16	53586461	53586461	C	T	MA1112.2 NR4A1	-8	revcomp	gaaGagatcatc	-8	revcomp	gaaAagatcatc	0.00396401	0.000336349	11.7854	ENSSSCG00000017018	16:53585961-53586461	16	53585961	53586461	85	1.44912	2.48317	97.6558	2.48317	2.56697e+06	0.0664774	16	55625320	56620257	TENM2	1.24215	0.250969	0.063868	0.956807	0.416246	0.66382	1.59453	0.0803496
AM	SNV	GATK	16	53586461	53586461	C	T	MA1951.1 FOS	-9	revcomp	ggaaGagatcatcg	-9	revcomp	ggaaAagatcatcg	0.000428036	0.00321916	0.132965	ENSSSCG00000017018	16:53585961-53586461	16	53585961	53586461	85	1.44912	2.48317	97.6558	2.48317	2.56697e+06	0.0664774	16	55625320	56620257	TENM2	1.24215	0.250969	0.063868	0.956807	0.416246	0.66382	1.59453	0.0803496
AM	SNV	GATK	16	53586461	53586461	C	T	MA0160.2 NR4A2	-6	revcomp	gaaGagatca	-6	revcomp	gaaAagatca	0.00407219	0.000340462	11.9608	ENSSSCG00000017018	16:53585961-53586461	16	53585961	53586461	85	1.44912	2.48317	97.6558	2.48317	2.56697e+06	0.0664774	16	55625320	56620257	TENM2	1.24215	0.250969	0.063868	0.956807	0.416246	0.66382	1.59453	0.0803496
AM	SNV	GATK	16	53586461	53586461	C	T	MA0606.2 Nfat5	-3	revcomp	tcttggaaGaga	-3	revcomp	tcttggaaAaga	0.0025	0.000179946	13.893	ENSSSCG00000017018	16:53585961-53586461	16	53585961	53586461	85	1.44912	2.48317	97.6558	2.48317	2.56697e+06	0.0664774	16	55625320	56620257	TENM2	1.24215	0.250969	0.063868	0.956807	0.416246	0.66382	1.59453	0.0803496
AM	SNV	GATK	16	53586461	53586461	C	T	MA0624.2 Nfatc1	-3	revcomp	tcttggaaGaga	-3	revcomp	tcttggaaAaga	0.00228155	0.000117064	19.4898	ENSSSCG00000017018	16:53585961-53586461	16	53585961	53586461	85	1.44912	2.48317	97.6558	2.48317	2.56697e+06	0.0664774	16	55625320	56620257	TENM2	1.24215	0.250969	0.063868	0.956807	0.416246	0.66382	1.59453	0.0803496
AM	SNV	GATK	16	53586461	53586461	C	T	MA0625.2 NFATC3	-2	revcomp	ttggaaGag	-2	revcomp	ttggaaAag	0.00251007	0.000297546	8.4359	ENSSSCG00000017018	16:53585961-53586461	16	53585961	53586461	85	1.44912	2.48317	97.6558	2.48317	2.56697e+06	0.0664774	16	55625320	56620257	TENM2	1.24215	0.250969	0.063868	0.956807	0.416246	0.66382	1.59453	0.0803496
AM	SNV	GATK	16	53586461	53586461	C	T	MA1525.2 NFATC4	-2	revcomp	cttggaaGag	-2	revcomp	cttggaaAag	0.00604439	0.000421524	14.3394	ENSSSCG00000017018	16:53585961-53586461	16	53585961	53586461	85	1.44912	2.48317	97.6558	2.48317	2.56697e+06	0.0664774	16	55625320	56620257	TENM2	1.24215	0.250969	0.063868	0.956807	0.416246	0.66382	1.59453	0.0803496
AM	SNV	GATK	16	53586461	53586461	C	T	MA0029.1 Mecom	-8	revcomp	tggaaGagatcatc	-8	revcomp	tggaaAagatcatc	0.00296468	0.000299044	9.91387	ENSSSCG00000017018	16:53585961-53586461	16	53585961	53586461	85	1.44912	2.48317	97.6558	2.48317	2.56697e+06	0.0664774	16	55625320	56620257	TENM2	1.24215	0.250969	0.063868	0.956807	0.416246	0.66382	1.59453	0.0803496
AM	SNV	GATK	18	46244828	46244828	C	T	MA0743.2 SCRT1	-11	direct	cccccaaccggCgtga	-11	direct	cccccaaccggTgtga	0.00359527	0.000328168	10.9556	ENSSSCG00000026894	18:46244766-46245266	18	46244766	46245266	106.667	20.7066	25.433	60.8032	25.433	4990	0.0669763	18	46217517	46250256	NFE2L3	0.635718	0.208119	0.325129	0.557298	-0.0523454	0.908065	0.258244	0.547504
AM	SNV	GATK	18	46244828	46244828	C	T	MA1968.1 TFCP2	-7	direct	caaccggCgt	-7	direct	caaccggTgt	0.00158882	0.000200272	7.93333	ENSSSCG00000026894	18:46244766-46245266	18	46244766	46245266	106.667	20.7066	25.433	60.8032	25.433	4990	0.0669763	18	46217517	46250256	NFE2L3	0.635718	0.208119	0.325129	0.557298	-0.0523454	0.908065	0.258244	0.547504
AM	SNV	GATK	18	46244828	46244828	C	T	MA1567.2 Tbx6	-4	direct	ccggCgtgatct	-4	direct	ccggTgtgatct	0.00398451	0.000332296	11.9909	ENSSSCG00000026894	18:46244766-46245266	18	46244766	46245266	106.667	20.7066	25.433	60.8032	25.433	4990	0.0669763	18	46217517	46250256	NFE2L3	0.635718	0.208119	0.325129	0.557298	-0.0523454	0.908065	0.258244	0.547504
AM	SNV	GATK	18	46244828	46244828	C	T	MA1621.1 Rbpjl	-8	revcomp	atcacGccggttgg	-8	revcomp	atcacAccggttgg	0.00651947	0.000484519	13.4556	ENSSSCG00000026894	18:46244766-46245266	18	46244766	46245266	106.667	20.7066	25.433	60.8032	25.433	4990	0.0669763	18	46217517	46250256	NFE2L3	0.635718	0.208119	0.325129	0.557298	-0.0523454	0.908065	0.258244	0.547504
AM	SNV	GATK	18	46244828	46244828	C	T	MA0647.1 GRHL1	-8	revcomp	cacGccggttgg	-8	revcomp	cacAccggttgg	0.00243419	0.000187516	12.9812	ENSSSCG00000026894	18:46244766-46245266	18	46244766	46245266	106.667	20.7066	25.433	60.8032	25.433	4990	0.0669763	18	46217517	46250256	NFE2L3	0.635718	0.208119	0.325129	0.557298	-0.0523454	0.908065	0.258244	0.547504
AM	SNV	GATK	18	46244828	46244828	C	T	MA0800.1 EOMES	-4	direct	ccggCgtgatctc	-4	direct	ccggTgtgatctc	0.00439991	0.000431284	10.2019	ENSSSCG00000026894	18:46244766-46245266	18	46244766	46245266	106.667	20.7066	25.433	60.8032	25.433	4990	0.0669763	18	46217517	46250256	NFE2L3	0.635718	0.208119	0.325129	0.557298	-0.0523454	0.908065	0.258244	0.547504
AM	SNV	GATK	18	46244828	46244828	C	T	MA0801.1 MGA	-3	direct	cggCgtga	-3	direct	cggTgtga	0.00126648	0.000106812	11.8571	ENSSSCG00000026894	18:46244766-46245266	18	46244766	46245266	106.667	20.7066	25.433	60.8032	25.433	4990	0.0669763	18	46217517	46250256	NFE2L3	0.635718	0.208119	0.325129	0.557298	-0.0523454	0.908065	0.258244	0.547504
AM	SNV	GATK	18	46244828	46244828	C	T	MA0803.1 TBX15	-3	direct	cggCgtga	-3	direct	cggTgtga	0.00296021	0.000289917	10.2105	ENSSSCG00000026894	18:46244766-46245266	18	46244766	46245266	106.667	20.7066	25.433	60.8032	25.433	4990	0.0669763	18	46217517	46250256	NFE2L3	0.635718	0.208119	0.325129	0.557298	-0.0523454	0.908065	0.258244	0.547504
AM	SNV	GATK	18	46244828	46244828	C	T	MA0805.1 TBX1	-3	direct	cggCgtga	-3	direct	cggTgtga	0.00276184	0.000167847	16.4545	ENSSSCG00000026894	18:46244766-46245266	18	46244766	46245266	106.667	20.7066	25.433	60.8032	25.433	4990	0.0669763	18	46217517	46250256	NFE2L3	0.635718	0.208119	0.325129	0.557298	-0.0523454	0.908065	0.258244	0.547504
AM	SNV	GATK	18	46244828	46244828	C	T	MA0806.1 TBX4	-3	direct	cggCgtga	-3	direct	cggTgtga	0.00294495	0.000259399	11.3529	ENSSSCG00000026894	18:46244766-46245266	18	46244766	46245266	106.667	20.7066	25.433	60.8032	25.433	4990	0.0669763	18	46217517	46250256	NFE2L3	0.635718	0.208119	0.325129	0.557298	-0.0523454	0.908065	0.258244	0.547504
AM	SNV	GATK	18	46244828	46244828	C	T	MA0807.1 TBX5	-3	direct	cggCgtga	-3	direct	cggTgtga	0.00288391	0.000244141	11.8125	ENSSSCG00000026894	18:46244766-46245266	18	46244766	46245266	106.667	20.7066	25.433	60.8032	25.433	4990	0.0669763	18	46217517	46250256	NFE2L3	0.635718	0.208119	0.325129	0.557298	-0.0523454	0.908065	0.258244	0.547504
AM	SNV	GATK	18	46244828	46244828	C	T	MA0014.3 PAX5	-3	direct	cggCgtgatctc	-3	direct	cggTgtgatctc	0.000336289	0.00376373	0.0893499	ENSSSCG00000026894	18:46244766-46245266	18	46244766	46245266	106.667	20.7066	25.433	60.8032	25.433	4990	0.0669763	18	46217517	46250256	NFE2L3	0.635718	0.208119	0.325129	0.557298	-0.0523454	0.908065	0.258244	0.547504
AM	SNV	GATK	3	111680167	111680167	C	A	MA1494.1 HNF4A	-3	revcomp	gaggccagagaGcaa	-3	revcomp	gaggccagagaTcaa	0.0010293	0.000126787	8.11829	ENSSSCG00000028672	3:111679759-111680259	3	111679759	111680259	118.333	33.9496	10.684	100	10.684	2994	0.150277	3	111649539	111676772	GCKR	0.161648	0.785775	0.158388	0.808463	-0.0231392	0.964358	-0.0198789	0.967632
AM	SNV	GATK	3	111680167	111680167	C	A	MA0512.2 Rxra	-2	revcomp	gaggccagagaGca	-2	revcomp	gaggccagagaTca	0.000708994	8.03061e-05	8.82864	ENSSSCG00000028672	3:111679759-111680259	3	111679759	111680259	118.333	33.9496	10.684	100	10.684	2994	0.150277	3	111649539	111676772	GCKR	0.161648	0.785775	0.158388	0.808463	-0.0231392	0.964358	-0.0198789	0.967632
AM	SNV	GATK	3	111680167	111680167	C	A	MA0504.1 NR2C2	-2	revcomp	agaggccagagaGca	-2	revcomp	agaggccagagaTca	4.64283e-05	8.98913e-06	5.16494	ENSSSCG00000028672	3:111679759-111680259	3	111679759	111680259	118.333	33.9496	10.684	100	10.684	2994	0.150277	3	111649539	111676772	GCKR	0.161648	0.785775	0.158388	0.808463	-0.0231392	0.964358	-0.0198789	0.967632
AM	SNV	GATK	3	111680167	111680167	C	A	MA0855.1 RXRB	-2	revcomp	gaggccagagaGca	-2	revcomp	gaggccagagaTca	0.00094115	0.000109833	8.56894	ENSSSCG00000028672	3:111679759-111680259	3	111679759	111680259	118.333	33.9496	10.684	100	10.684	2994	0.150277	3	111649539	111676772	GCKR	0.161648	0.785775	0.158388	0.808463	-0.0231392	0.964358	-0.0198789	0.967632
AM	SNV	GATK	3	111680167	111680167	C	A	MA1148.1 PPARA::RXRA	-3	revcomp	caagaggccagagaGcaa	-3	revcomp	caagaggccagagaTcaa	0.000990062	0.000119159	8.30871	ENSSSCG00000028672	3:111679759-111680259	3	111679759	111680259	118.333	33.9496	10.684	100	10.684	2994	0.150277	3	111649539	111676772	GCKR	0.161648	0.785775	0.158388	0.808463	-0.0231392	0.964358	-0.0198789	0.967632
AM	SNV	GATK	3	111680167	111680167	C	A	MA1948.1 ETV5::HOXA2	-10	revcomp	agaGcaagtaaata	-10	revcomp	agaTcaagtaaata	0.000381794	0.0044	0.0867713	ENSSSCG00000028672	3:111679759-111680259	3	111679759	111680259	118.333	33.9496	10.684	100	10.684	2994	0.150277	3	111649539	111676772	GCKR	0.161648	0.785775	0.158388	0.808463	-0.0231392	0.964358	-0.0198789	0.967632
AM	SNV	GATK	3	111680167	111680167	C	A	MA1982.1 ZNF574	-4	revcomp	aggccagagaGcaag	-4	revcomp	aggccagagaTcaag	0.000355035	0.00374164	0.0948877	ENSSSCG00000028672	3:111679759-111680259	3	111679759	111680259	118.333	33.9496	10.684	100	10.684	2994	0.150277	3	111649539	111676772	GCKR	0.161648	0.785775	0.158388	0.808463	-0.0231392	0.964358	-0.0198789	0.967632
AM	SNV	GATK	3	111680167	111680167	C	A	MA1944.1 ETV5::DRGX	-10	revcomp	agaGcaagtaaata	-10	revcomp	agaTcaagtaaata	0.000151809	0.00228893	0.0663233	ENSSSCG00000028672	3:111679759-111680259	3	111679759	111680259	118.333	33.9496	10.684	100	10.684	2994	0.150277	3	111649539	111676772	GCKR	0.161648	0.785775	0.158388	0.808463	-0.0231392	0.964358	-0.0198789	0.967632
AM	SNV	GATK	3	111680167	111680167	C	A	MA0856.1 RXRG	-2	revcomp	gaggccagagaGca	-2	revcomp	gaggccagagaTca	0.000733737	7.80337e-05	9.40283	ENSSSCG00000028672	3:111679759-111680259	3	111679759	111680259	118.333	33.9496	10.684	100	10.684	2994	0.150277	3	111649539	111676772	GCKR	0.161648	0.785775	0.158388	0.808463	-0.0231392	0.964358	-0.0198789	0.967632
AM	SNV	GATK	3	111680167	111680167	C	A	MA1931.1 ELK1::HOXA1	-10	revcomp	agaGcaagtaaata	-10	revcomp	agaTcaagtaaata	0.000326417	0.00314023	0.103947	ENSSSCG00000028672	3:111679759-111680259	3	111679759	111680259	118.333	33.9496	10.684	100	10.684	2994	0.150277	3	111649539	111676772	GCKR	0.161648	0.785775	0.158388	0.808463	-0.0231392	0.964358	-0.0198789	0.967632
AM	SNV	GATK	3	111680167	111680167	C	A	MA1537.1 NR2F1	-3	revcomp	gaggccagagaGcaa	-3	revcomp	gaggccagagaTcaa	0.00049494	5.7877e-05	8.55158	ENSSSCG00000028672	3:111679759-111680259	3	111679759	111680259	118.333	33.9496	10.684	100	10.684	2994	0.150277	3	111649539	111676772	GCKR	0.161648	0.785775	0.158388	0.808463	-0.0231392	0.964358	-0.0198789	0.967632
AM	SNV	GATK	3	111680167	111680167	C	A	MA0677.1 Nr2f6	-2	revcomp	gaggccagagaGca	-2	revcomp	gaggccagagaTca	0.000550132	5.36032e-05	10.263	ENSSSCG00000028672	3:111679759-111680259	3	111679759	111680259	118.333	33.9496	10.684	100	10.684	2994	0.150277	3	111649539	111676772	GCKR	0.161648	0.785775	0.158388	0.808463	-0.0231392	0.964358	-0.0198789	0.967632
AM	SNV	GATK	3	111680167	111680167	C	A	MA0080.6 Spi1	-9	revcomp	ccagagaGcaagtaaat	-9	revcomp	ccagagaTcaagtaaat	0.000433634	0.00388483	0.111623	ENSSSCG00000028672	3:111679759-111680259	3	111679759	111680259	118.333	33.9496	10.684	100	10.684	2994	0.150277	3	111649539	111676772	GCKR	0.161648	0.785775	0.158388	0.808463	-0.0231392	0.964358	-0.0198789	0.967632
AM	SNV	GATK	3	111680167	111680167	C	A	MA0508.3 PRDM1	-6	direct	tacttgCtctc	-6	direct	tacttgAtctc	0.000107288	0.00184584	0.0581245	ENSSSCG00000028672	3:111679759-111680259	3	111679759	111680259	118.333	33.9496	10.684	100	10.684	2994	0.150277	3	111649539	111676772	GCKR	0.161648	0.785775	0.158388	0.808463	-0.0231392	0.964358	-0.0198789	0.967632
AM	SNV	GATK	3	111680167	111680167	C	A	MA0115.1 NR1H2::RXRA	-4	revcomp	agaggccagagaGcaag	-4	revcomp	agaggccagagaTcaag	0.000140884	1.43193e-05	9.83877	ENSSSCG00000028672	3:111679759-111680259	3	111679759	111680259	118.333	33.9496	10.684	100	10.684	2994	0.150277	3	111649539	111676772	GCKR	0.161648	0.785775	0.158388	0.808463	-0.0231392	0.964358	-0.0198789	0.967632
AM	SNV	GATK	3	111680167	111680167	C	A	MA1574.1 THRB	-3	revcomp	gaggccagagaGcaa	-3	revcomp	gaggccagagaTcaa	0.000690714	9.91747e-05	6.96462	ENSSSCG00000028672	3:111679759-111680259	3	111679759	111680259	118.333	33.9496	10.684	100	10.684	2994	0.150277	3	111649539	111676772	GCKR	0.161648	0.785775	0.158388	0.808463	-0.0231392	0.964358	-0.0198789	0.967632
AM	SNV	GATK	3	111680167	111680167	C	A	MA1550.1 PPARD	-3	revcomp	agaggccagagaGcaa	-3	revcomp	agaggccagagaTcaa	0.000542571	5.30188e-05	10.2336	ENSSSCG00000028672	3:111679759-111680259	3	111679759	111680259	118.333	33.9496	10.684	100	10.684	2994	0.150277	3	111649539	111676772	GCKR	0.161648	0.785775	0.158388	0.808463	-0.0231392	0.964358	-0.0198789	0.967632
AM	SNV	GATK	3	111681446	111681446	C	T	MA0741.1 KLF16	-7	direct	gacactcCcac	-7	direct	gacactcTcac	4.05312e-05	0.00101781	0.039822	ENSSSCG00000028672	3:111681142-111681642	3	111681142	111681642	104.333	33.9496	9.42001	100	9.42001	4377	0.132498	3	111649539	111676772	GCKR	0.161648	0.785775	0.158388	0.808463	-0.0231392	0.964358	-0.0198789	0.967632
AM	SNV	GATK	3	111681446	111681446	C	T	MA1532.2 NR1D2	-8	revcomp	atggtgGgagtgtca	-8	revcomp	atggtgAgagtgtca	0.00370177	0.000467486	7.91848	ENSSSCG00000028672	3:111681142-111681642	3	111681142	111681642	104.333	33.9496	9.42001	100	9.42001	4377	0.132498	3	111649539	111676772	GCKR	0.161648	0.785775	0.158388	0.808463	-0.0231392	0.964358	-0.0198789	0.967632
AM	SNV	GATK	3	111681446	111681446	C	T	MA1512.1 KLF11	-7	direct	gacactcCcac	-7	direct	gacactcTcac	4.86374e-05	0.0010519	0.0462375	ENSSSCG00000028672	3:111681142-111681642	3	111681142	111681642	104.333	33.9496	9.42001	100	9.42001	4377	0.132498	3	111649539	111676772	GCKR	0.161648	0.785775	0.158388	0.808463	-0.0231392	0.964358	-0.0198789	0.967632
AM	SNV	GATK	3	111681446	111681446	C	T	MA0747.1 SP8	-7	direct	gacactcCcacc	-7	direct	gacactcTcacc	1.93119e-05	0.00061059	0.0316283	ENSSSCG00000028672	3:111681142-111681642	3	111681142	111681642	104.333	33.9496	9.42001	100	9.42001	4377	0.132498	3	111649539	111676772	GCKR	0.161648	0.785775	0.158388	0.808463	-0.0231392	0.964358	-0.0198789	0.967632
AM	SNV	GATK	3	111681446	111681446	C	T	MA1107.2 KLF9	-9	direct	atgacactcCcaccat	-9	direct	atgacactcTcaccat	5.41015e-05	0.000657107	0.0823329	ENSSSCG00000028672	3:111681142-111681642	3	111681142	111681642	104.333	33.9496	9.42001	100	9.42001	4377	0.132498	3	111649539	111676772	GCKR	0.161648	0.785775	0.158388	0.808463	-0.0231392	0.964358	-0.0198789	0.967632
AM	SNV	GATK	3	111681446	111681446	C	T	MA1517.1 KLF6	-8	direct	tgacactcCca	-8	direct	tgacactcTca	0.000313759	0.00491571	0.0638277	ENSSSCG00000028672	3:111681142-111681642	3	111681142	111681642	104.333	33.9496	9.42001	100	9.42001	4377	0.132498	3	111649539	111676772	GCKR	0.161648	0.785775	0.158388	0.808463	-0.0231392	0.964358	-0.0198789	0.967632
AM	SNV	GATK	3	111681446	111681446	C	T	MA0746.2 SP3	-8	direct	tgacactcCcacc	-8	direct	tgacactcTcacc	8.9556e-05	0.0014288	0.0626793	ENSSSCG00000028672	3:111681142-111681642	3	111681142	111681642	104.333	33.9496	9.42001	100	9.42001	4377	0.132498	3	111649539	111676772	GCKR	0.161648	0.785775	0.158388	0.808463	-0.0231392	0.964358	-0.0198789	0.967632
AM	SNV	GATK	3	111681446	111681446	C	T	MA1531.1 NR1D1	-9	revcomp	tggtgGgagtgtcat	-9	revcomp	tggtgAgagtgtcat	0.00258673	0.000256024	10.1035	ENSSSCG00000028672	3:111681142-111681642	3	111681142	111681642	104.333	33.9496	9.42001	100	9.42001	4377	0.132498	3	111649539	111676772	GCKR	0.161648	0.785775	0.158388	0.808463	-0.0231392	0.964358	-0.0198789	0.967632
AM	SNV	GATK	3	111681521	111681521	C	T	MA1725.1 ZNF189	-8	direct	gtcggtgtCcctg	-8	direct	gtcggtgtTcctg	0.00475532	0.000416756	11.4103	ENSSSCG00000028672	3:111681142-111681642	3	111681142	111681642	104.333	33.9496	9.42001	100	9.42001	4377	0.132498	3	111649539	111676772	GCKR	0.161648	0.785775	0.158388	0.808463	-0.0231392	0.964358	-0.0198789	0.967632
AM	SNV	GATK	3	111681521	111681521	C	T	MA0695.1 ZBTB7C	-8	revcomp	aggGacaccgac	-8	revcomp	aggAacaccgac	0.00477999	0.000485241	9.85076	ENSSSCG00000028672	3:111681142-111681642	3	111681142	111681642	104.333	33.9496	9.42001	100	9.42001	4377	0.132498	3	111649539	111676772	GCKR	0.161648	0.785775	0.158388	0.808463	-0.0231392	0.964358	-0.0198789	0.967632
AM	SNV	GATK	3	111681521	111681521	C	T	MA1574.1 THRB	-4	revcomp	caggtccaggGacac	-4	revcomp	caggtccaggAacac	0.000297739	0.00225397	0.132096	ENSSSCG00000028672	3:111681142-111681642	3	111681142	111681642	104.333	33.9496	9.42001	100	9.42001	4377	0.132498	3	111649539	111676772	GCKR	0.161648	0.785775	0.158388	0.808463	-0.0231392	0.964358	-0.0198789	0.967632
AM	SNV	GATK	3	111681521	111681521	C	T	MA1550.1 PPARD	-4	revcomp	ccaggtccaggGacac	-4	revcomp	ccaggtccaggAacac	0.000317767	0.0021114	0.150501	ENSSSCG00000028672	3:111681142-111681642	3	111681142	111681642	104.333	33.9496	9.42001	100	9.42001	4377	0.132498	3	111649539	111676772	GCKR	0.161648	0.785775	0.158388	0.808463	-0.0231392	0.964358	-0.0198789	0.967632
AM	SNV	GATK	3	111681521	111681521	C	T	MA1589.1 ZNF140	-12	direct	tagggtcggtgtCcctggacc	-12	direct	tagggtcggtgtTcctggacc	0.00278063	0.000477282	5.82597	ENSSSCG00000028672	3:111681142-111681642	3	111681142	111681642	104.333	33.9496	9.42001	100	9.42001	4377	0.132498	3	111649539	111676772	GCKR	0.161648	0.785775	0.158388	0.808463	-0.0231392	0.964358	-0.0198789	0.967632
AM	SNV	GATK	3	111681521	111681521	C	T	MA0677.1 Nr2f6	-3	revcomp	caggtccaggGaca	-3	revcomp	caggtccaggAaca	0.000202984	0.00163188	0.124386	ENSSSCG00000028672	3:111681142-111681642	3	111681142	111681642	104.333	33.9496	9.42001	100	9.42001	4377	0.132498	3	111649539	111676772	GCKR	0.161648	0.785775	0.158388	0.808463	-0.0231392	0.964358	-0.0198789	0.967632
AM	SNV	GATK	3	111681521	111681521	C	T	MA1624.1 Stat5a	-3	revcomp	ggtccaggGaca	-3	revcomp	ggtccaggAaca	0.00312513	0.000209868	14.8909	ENSSSCG00000028672	3:111681142-111681642	3	111681142	111681642	104.333	33.9496	9.42001	100	9.42001	4377	0.132498	3	111649539	111676772	GCKR	0.161648	0.785775	0.158388	0.808463	-0.0231392	0.964358	-0.0198789	0.967632
AM	SNV	GATK	3	111681521	111681521	C	T	MA0512.2 Rxra	-3	revcomp	caggtccaggGaca	-3	revcomp	caggtccaggAaca	0.000281103	0.00191279	0.14696	ENSSSCG00000028672	3:111681142-111681642	3	111681142	111681642	104.333	33.9496	9.42001	100	9.42001	4377	0.132498	3	111649539	111676772	GCKR	0.161648	0.785775	0.158388	0.808463	-0.0231392	0.964358	-0.0198789	0.967632
AM	SNV	GATK	3	111681521	111681521	C	T	MA0504.1 NR2C2	-3	revcomp	ccaggtccaggGaca	-3	revcomp	ccaggtccaggAaca	0.000249038	0.00203752	0.122226	ENSSSCG00000028672	3:111681142-111681642	3	111681142	111681642	104.333	33.9496	9.42001	100	9.42001	4377	0.132498	3	111649539	111676772	GCKR	0.161648	0.785775	0.158388	0.808463	-0.0231392	0.964358	-0.0198789	0.967632
AM	SNV	GATK	3	111681521	111681521	C	T	MA1418.1 IRF3	-12	revcomp	ggtccaggGacaccgacccta	-12	revcomp	ggtccaggAacaccgacccta	0.000435381	0.00296424	0.146878	ENSSSCG00000028672	3:111681142-111681642	3	111681142	111681642	104.333	33.9496	9.42001	100	9.42001	4377	0.132498	3	111649539	111676772	GCKR	0.161648	0.785775	0.158388	0.808463	-0.0231392	0.964358	-0.0198789	0.967632
AM	SNV	GATK	3	111681521	111681521	C	T	MA0137.3 STAT1	-2	revcomp	ggtccaggGac	-2	revcomp	ggtccaggAac	0.00472355	0.000387669	12.1845	ENSSSCG00000028672	3:111681142-111681642	3	111681142	111681642	104.333	33.9496	9.42001	100	9.42001	4377	0.132498	3	111649539	111676772	GCKR	0.161648	0.785775	0.158388	0.808463	-0.0231392	0.964358	-0.0198789	0.967632
AM	SNV	GATK	3	111681521	111681521	C	T	MA1539.1 NR2F6	-11	direct	agggtcggtgtCcct	-11	direct	agggtcggtgtTcct	4.37554e-05	0.000512717	0.0853402	ENSSSCG00000028672	3:111681142-111681642	3	111681142	111681642	104.333	33.9496	9.42001	100	9.42001	4377	0.132498	3	111649539	111676772	GCKR	0.161648	0.785775	0.158388	0.808463	-0.0231392	0.964358	-0.0198789	0.967632
AM	SNV	GATK	3	111681521	111681521	C	T	MA0856.1 RXRG	-3	revcomp	caggtccaggGaca	-3	revcomp	caggtccaggAaca	0.000309058	0.00195905	0.157759	ENSSSCG00000028672	3:111681142-111681642	3	111681142	111681642	104.333	33.9496	9.42001	100	9.42001	4377	0.132498	3	111649539	111676772	GCKR	0.161648	0.785775	0.158388	0.808463	-0.0231392	0.964358	-0.0198789	0.967632
AM	SNV	GATK	3	111681521	111681521	C	T	MA1712.1 ZNF454	-4	direct	gtgtCcctggacctgggg	-4	direct	gtgtTcctggacctgggg	0.000371244	5.89699e-05	6.29548	ENSSSCG00000028672	3:111681142-111681642	3	111681142	111681642	104.333	33.9496	9.42001	100	9.42001	4377	0.132498	3	111649539	111676772	GCKR	0.161648	0.785775	0.158388	0.808463	-0.0231392	0.964358	-0.0198789	0.967632
AM	SNV	GATK	3	111681521	111681521	C	T	MA1147.1 NR4A2::RXRA	-11	direct	agggtcggtgtCcct	-11	direct	agggtcggtgtTcct	7.82125e-05	0.000856396	0.0913275	ENSSSCG00000028672	3:111681142-111681642	3	111681142	111681642	104.333	33.9496	9.42001	100	9.42001	4377	0.132498	3	111649539	111676772	GCKR	0.161648	0.785775	0.158388	0.808463	-0.0231392	0.964358	-0.0198789	0.967632
AM	SNV	GATK	3	111681521	111681521	C	T	MA0138.2 REST	-8	revcomp	cccaggtccaggGacaccgac	-8	revcomp	cccaggtccaggAacaccgac	1.48656e-05	0.00015889	0.0935587	ENSSSCG00000028672	3:111681142-111681642	3	111681142	111681642	104.333	33.9496	9.42001	100	9.42001	4377	0.132498	3	111649539	111676772	GCKR	0.161648	0.785775	0.158388	0.808463	-0.0231392	0.964358	-0.0198789	0.967632
AM	SNV	GATK	3	111681521	111681521	C	T	MA1538.1 NR2F1	-11	direct	agggtcggtgtCcct	-11	direct	agggtcggtgtTcct	3.67034e-05	0.000492804	0.0744788	ENSSSCG00000028672	3:111681142-111681642	3	111681142	111681642	104.333	33.9496	9.42001	100	9.42001	4377	0.132498	3	111649539	111676772	GCKR	0.161648	0.785775	0.158388	0.808463	-0.0231392	0.964358	-0.0198789	0.967632
AM	SNV	GATK	3	111681521	111681521	C	T	MA0855.1 RXRB	-3	revcomp	caggtccaggGaca	-3	revcomp	caggtccaggAaca	0.000434875	0.00262091	0.165926	ENSSSCG00000028672	3:111681142-111681642	3	111681142	111681642	104.333	33.9496	9.42001	100	9.42001	4377	0.132498	3	111649539	111676772	GCKR	0.161648	0.785775	0.158388	0.808463	-0.0231392	0.964358	-0.0198789	0.967632
AM	SNV	GATK	3	111681521	111681521	C	T	MA0115.1 NR1H2::RXRA	-5	revcomp	ccaggtccaggGacacc	-5	revcomp	ccaggtccaggAacacc	0.000177202	0.00123531	0.143447	ENSSSCG00000028672	3:111681142-111681642	3	111681142	111681642	104.333	33.9496	9.42001	100	9.42001	4377	0.132498	3	111649539	111676772	GCKR	0.161648	0.785775	0.158388	0.808463	-0.0231392	0.964358	-0.0198789	0.967632
AM	SNV	GATK	3	111681521	111681521	C	T	MA1537.1 NR2F1	-4	revcomp	caggtccaggGacac	-4	revcomp	caggtccaggAacac	0.000162707	0.00139736	0.116438	ENSSSCG00000028672	3:111681142-111681642	3	111681142	111681642	104.333	33.9496	9.42001	100	9.42001	4377	0.132498	3	111649539	111676772	GCKR	0.161648	0.785775	0.158388	0.808463	-0.0231392	0.964358	-0.0198789	0.967632
AM	SNV	GATK	3	11571553	11571553	G	A	MA1653.1 ZNF148	-6	revcomp	gccccCtccatc	-5	revcomp	agccccTtccat	7.34329e-05	0.000984192	0.0746124	ENSSSCG00000007720	3:11571053-11571553	3	11571053	11571553	97.5	12.5152	13.7204	39.7273	13.7204	23772	0.0344551	3	11538314	11654770	GTF2IRD1	-0.231625	0.529974	-0.488618	0.227443	-0.0188546	0.954542	0.238138	0.446215
AM	SNV	GATK	3	11571553	11571553	G	A	MA1972.1 ZFP14	0	direct	Gggggctcggggatg	0	direct	Aggggctcggggatg	0.000158761	0.00107748	0.147344	ENSSSCG00000007720	3:11571053-11571553	3	11571053	11571553	97.5	12.5152	13.7204	39.7273	13.7204	23772	0.0344551	3	11538314	11654770	GTF2IRD1	-0.231625	0.529974	-0.488618	0.227443	-0.0188546	0.954542	0.238138	0.446215
AM	SNV	GATK	3	11571553	11571553	G	A	MA1102.2 CTCFL	-4	direct	tggaGggggctc	-4	direct	tggaAggggctc	6.6638e-05	0.00123143	0.0541142	ENSSSCG00000007720	3:11571053-11571553	3	11571053	11571553	97.5	12.5152	13.7204	39.7273	13.7204	23772	0.0344551	3	11538314	11654770	GTF2IRD1	-0.231625	0.529974	-0.488618	0.227443	-0.0188546	0.954542	0.238138	0.446215
AM	SNV	GATK	3	11571553	11571553	G	A	MA0753.2 ZNF740	-5	revcomp	gagccccCtccat	-5	revcomp	gagccccTtccat	0.000163868	0.00188313	0.0870188	ENSSSCG00000007720	3:11571053-11571553	3	11571053	11571553	97.5	12.5152	13.7204	39.7273	13.7204	23772	0.0344551	3	11538314	11654770	GTF2IRD1	-0.231625	0.529974	-0.488618	0.227443	-0.0188546	0.954542	0.238138	0.446215
AM	SNV	GATK	3	11571553	11571553	G	A	MA1522.1 MAZ	-5	revcomp	gccccCtccat	-4	revcomp	agccccTtcca	3.6478e-05	0.000385523	0.0946197	ENSSSCG00000007720	3:11571053-11571553	3	11571053	11571553	97.5	12.5152	13.7204	39.7273	13.7204	23772	0.0344551	3	11538314	11654770	GTF2IRD1	-0.231625	0.529974	-0.488618	0.227443	-0.0188546	0.954542	0.238138	0.446215
AM	SNV	GATK	3	11571553	11571553	G	A	MA0073.1 RREB1	-8	revcomp	ccccgagccccCtccatcac	-8	revcomp	ccccgagccccTtccatcac	0.000277005	0.00223551	0.123911	ENSSSCG00000007720	3:11571053-11571553	3	11571053	11571553	97.5	12.5152	13.7204	39.7273	13.7204	23772	0.0344551	3	11538314	11654770	GTF2IRD1	-0.231625	0.529974	-0.488618	0.227443	-0.0188546	0.954542	0.238138	0.446215
AM	SNV	GATK	3	4698757	4698757	C	T	MA1712.1 ZNF454	-8	revcomp	ctgctctggGcctgggcg	-8	revcomp	ctgctctggAcctgggcg	0.000113529	0.00157296	0.0721751	ENSSSCG00000031432	3:4698488-4698988	3	4698488	4698988	148.167	16.2189	14.1537	44.4235	14.1537	17680	0.0512183	3	4716646	4735300	KDELR2	-0.349356	0.324995	-0.517974	0.183886	-0.0831893	0.794393	0.0854282	0.776771
AM	SNV	GATK	3	4698757	4698757	C	T	MA1986.1 ZNF692	-4	direct	caggCccaga	-4	direct	caggTccaga	0.000161171	0.00318241	0.0506443	ENSSSCG00000031432	3:4698488-4698988	3	4698488	4698988	148.167	16.2189	14.1537	44.4235	14.1537	17680	0.0512183	3	4716646	4735300	KDELR2	-0.349356	0.324995	-0.517974	0.183886	-0.0831893	0.794393	0.0854282	0.776771
AM	SNV	GATK	3	4698757	4698757	C	T	MA0162.4 EGR1	-11	direct	ggtcgcccaggCcc	-11	direct	ggtcgcccaggTcc	0.000112992	0.00110851	0.101931	ENSSSCG00000031432	3:4698488-4698988	3	4698488	4698988	148.167	16.2189	14.1537	44.4235	14.1537	17680	0.0512183	3	4716646	4735300	KDELR2	-0.349356	0.324995	-0.517974	0.183886	-0.0831893	0.794393	0.0854282	0.776771
AM	SNV	GATK	3	4698757	4698757	C	T	MA1579.1 ZBTB26	-3	direct	aggCccagagcagcc	-3	direct	aggTccagagcagcc	0.00486654	0.000305353	15.9374	ENSSSCG00000031432	3:4698488-4698988	3	4698488	4698988	148.167	16.2189	14.1537	44.4235	14.1537	17680	0.0512183	3	4716646	4735300	KDELR2	-0.349356	0.324995	-0.517974	0.183886	-0.0831893	0.794393	0.0854282	0.776771
AM	SNV	GATK	3	4698757	4698757	C	T	MA1541.1 NR6A1	-7	direct	gcccaggCccagagcag	-7	direct	gcccaggTccagagcag	0.00301717	0.00040179	7.50932	ENSSSCG00000031432	3:4698488-4698988	3	4698488	4698988	148.167	16.2189	14.1537	44.4235	14.1537	17680	0.0512183	3	4716646	4735300	KDELR2	-0.349356	0.324995	-0.517974	0.183886	-0.0831893	0.794393	0.0854282	0.776771
AM	SNV	GATK	3	4698757	4698757	C	T	MA1516.1 KLF3	-7	direct	gcccaggCcca	-7	direct	gcccaggTcca	0.000173569	0.00262427	0.0661397	ENSSSCG00000031432	3:4698488-4698988	3	4698488	4698988	148.167	16.2189	14.1537	44.4235	14.1537	17680	0.0512183	3	4716646	4735300	KDELR2	-0.349356	0.324995	-0.517974	0.183886	-0.0831893	0.794393	0.0854282	0.776771
AM	SNV	GATK	3	4698757	4698757	C	T	MA0066.1 PPARG	-15	revcomp	ctggGcctgggcgaccctct	-15	revcomp	ctggAcctgggcgaccctct	0.000197647	0.0015157	0.130399	ENSSSCG00000031432	3:4698488-4698988	3	4698488	4698988	148.167	16.2189	14.1537	44.4235	14.1537	17680	0.0512183	3	4716646	4735300	KDELR2	-0.349356	0.324995	-0.517974	0.183886	-0.0831893	0.794393	0.0854282	0.776771
AM	SNV	GATK	3	4698757	4698757	C	T	MA0506.2 Nrf1	-8	revcomp	ctctggGcctgggcg	-8	revcomp	ctctggAcctgggcg	6.92522e-05	0.000915281	0.0756623	ENSSSCG00000031432	3:4698488-4698988	3	4698488	4698988	148.167	16.2189	14.1537	44.4235	14.1537	17680	0.0512183	3	4716646	4735300	KDELR2	-0.349356	0.324995	-0.517974	0.183886	-0.0831893	0.794393	0.0854282	0.776771
AM	SNV	GATK	3	4698757	4698757	C	T	MA1517.1 KLF6	-7	direct	gcccaggCcca	-7	direct	gcccaggTcca	0.000313759	0.00537372	0.0583877	ENSSSCG00000031432	3:4698488-4698988	3	4698488	4698988	148.167	16.2189	14.1537	44.4235	14.1537	17680	0.0512183	3	4716646	4735300	KDELR2	-0.349356	0.324995	-0.517974	0.183886	-0.0831893	0.794393	0.0854282	0.776771
AM	SNV	GATK	3	4698757	4698757	C	T	MA0472.2 EGR2	-9	direct	tcgcccaggCc	-9	direct	tcgcccaggTc	0.000233889	0.00207973	0.112461	ENSSSCG00000031432	3:4698488-4698988	3	4698488	4698988	148.167	16.2189	14.1537	44.4235	14.1537	17680	0.0512183	3	4716646	4735300	KDELR2	-0.349356	0.324995	-0.517974	0.183886	-0.0831893	0.794393	0.0854282	0.776771
AM	SNV	GATK	3	4698757	4698757	C	T	MA1515.1 KLF2	-7	direct	gcccaggCcca	-7	direct	gcccaggTcca	0.000480652	0.00806022	0.0596326	ENSSSCG00000031432	3:4698488-4698988	3	4698488	4698988	148.167	16.2189	14.1537	44.4235	14.1537	17680	0.0512183	3	4716646	4735300	KDELR2	-0.349356	0.324995	-0.517974	0.183886	-0.0831893	0.794393	0.0854282	0.776771
AM	SNV	GATK	4	10182319	10182319	G	T	MA1731.1 ZNF768	-6	direct	cccgccGctctcgccggg	-10	direct	gccccccgccTctctcgc	0.00271943	0.000366529	7.41942	ENSSSCG00000028759	4:10182290-10182790	4	10182290	10182790	354.167	18.4746	207.636	49.9388	207.636	2533	0.26119	4	10179758	10451929	ASAP1	0.00538448	0.986253	0.324796	0.344064	-0.104286	0.710695	-0.423698	0.110265
AM	SNV	GATK	4	30208745	30208745	G	A	MA1964.1 SMAD2	-2	revcomp	ggcctgaCac	-2	revcomp	ggcctgaTac	0.000453949	0.00786495	0.057718	ENSSSCG00000019261	4:30208643-30209143	4	30208643	30209143	112.5	1.87524	8.25592	42.3925	8.25592	874946	0.260288	4	29333698	29333800	U6	1.50988	0.757603	1.61558	0.763677	0	1	0	1
AM	SNV	GATK	4	30208745	30208745	G	A	MA0018.4 CREB1	-7	direct	tattggtGtcagg	-7	direct	tattggtAtcagg	0.000383839	0.00442415	0.0867599	ENSSSCG00000019261	4:30208643-30209143	4	30208643	30209143	112.5	1.87524	8.25592	42.3925	8.25592	874946	0.260288	4	29333698	29333800	U6	1.50988	0.757603	1.61558	0.763677	0	1	0	1
AM	SNV	GATK	4	30209080	30209080	C	G	MA1938.1 ERF::NHLH1	-5	revcomp	cacagctgaagGaaccc	-5	revcomp	cacagctgaagCaaccc	0.00022034	0.00145752	0.151175	ENSSSCG00000019261	4:30208643-30209143	4	30208643	30209143	112.5	1.87524	8.25592	42.3925	8.25592	874946	0.260288	4	29333698	29333800	U6	1.50988	0.757603	1.61558	0.763677	0	1	0	1
AM	SNV	GATK	4	30209080	30209080	C	G	MA0149.1 EWSR1-FLI1	-12	revcomp	tgaagGaacccaggaggt	-12	revcomp	tgaagCaacccaggaggt	0.000138433	0.00075448	0.183482	ENSSSCG00000019261	4:30208643-30209143	4	30208643	30209143	112.5	1.87524	8.25592	42.3925	8.25592	874946	0.260288	4	29333698	29333800	U6	1.50988	0.757603	1.61558	0.763677	0	1	0	1
AM	SNV	GATK	4	75761930	75761930	C	G	MA1102.2 CTCFL	-2	direct	acCaggtcgcgc	-2	direct	acGaggtcgcgc	0.000357211	0.00199097	0.179415	ENSSSCG00000006245	4:75761858-75762358	4	75761858	75762358	234.667	3.97678	5.56761	51.2091	5.56761	174893	0.0464537	4	75586525	75598989	SDR16C5	-0.592451	0.832166	-1.10586	0.718674	-1.4245	0.571222	-0.91109	0.701399
AM	SNV	GATK	4	75761951	75761951	C	T	MA1961.1 PATZ1	-9	revcomp	caGcggtggggc	-9	revcomp	caAcggtggggc	0.000166714	0.000967026	0.172399	ENSSSCG00000006245	4:75761858-75762358	4	75761858	75762358	234.667	3.97678	5.56761	51.2091	5.56761	174893	0.0464537	4	75586525	75598989	SDR16C5	-0.592451	0.832166	-1.10586	0.718674	-1.4245	0.571222	-0.91109	0.701399
AM	SNV	GATK	4	75761951	75761951	C	T	MA0471.2 E2F6	-2	revcomp	cctggcggcaGcg	-2	revcomp	cctggcggcaAcg	0.00162436	0.000297099	5.4674	ENSSSCG00000006245	4:75761858-75762358	4	75761858	75762358	234.667	3.97678	5.56761	51.2091	5.56761	174893	0.0464537	4	75586525	75598989	SDR16C5	-0.592451	0.832166	-1.10586	0.718674	-1.4245	0.571222	-0.91109	0.701399
AM	SNV	GATK	4	75761951	75761951	C	T	MA1554.1 RFX7	-2	direct	cgCtgccgc	-2	direct	cgTtgccgc	0.00284576	0.000144958	19.6316	ENSSSCG00000006245	4:75761858-75762358	4	75761858	75762358	234.667	3.97678	5.56761	51.2091	5.56761	174893	0.0464537	4	75586525	75598989	SDR16C5	-0.592451	0.832166	-1.10586	0.718674	-1.4245	0.571222	-0.91109	0.701399
AM	SNV	GATK	5	69299596	69299596	G	A	MA1105.2 GRHL2	-2	direct	caGacagattgg	-2	direct	caAacagattgg	0.00213498	0.000214994	9.93041	ENSSSCG00000041764	5:69299412-69299912	5	69299412	69299912	102.5	12.0238	6.40898	37.7151	6.40898	23995.2	0.0228449	5	69275176	69448430	CACNA1C	-0.250518	0.670208	-0.0785975	0.903307	0.166646	0.752768	-0.00527462	0.991559
AM	SNV	GATK	5	69299596	69299596	G	A	MA1964.1 SMAD2	-5	direct	ggtcaGacag	-5	direct	ggtcaAacag	0.000391006	0.00656033	0.0596017	ENSSSCG00000041764	5:69299412-69299912	5	69299412	69299912	102.5	12.0238	6.40898	37.7151	6.40898	23995.2	0.0228449	5	69275176	69448430	CACNA1C	-0.250518	0.670208	-0.0785975	0.903307	0.166646	0.752768	-0.00527462	0.991559
AM	SNV	GATK	6	39826792	39826792	G	A	MA1637.1 EBF3	-10	revcomp	acCcccagggaag	-11	revcomp	cTcccagggaagt	2.29478e-05	0.000207305	0.110696	ENSSSCG00000032153	6:39826551-39827051	6	39826551	39827051	102.667	26.3475	26.9291	100	26.9291	1552	0.0901016	6	39813665	39825000	C19orf12	-0.0775924	0.792241	-0.252497	0.435164	-0.00953331	0.971256	0.165371	0.508155
AM	SNV	GATK	6	39826792	39826792	G	A	MA0520.1 Stat6	-11	revcomp	cacCcccagggaagt	-11	revcomp	cacTcccagggaagt	0.00286148	0.000178733	16.0098	ENSSSCG00000032153	6:39826551-39827051	6	39826551	39827051	102.667	26.3475	26.9291	100	26.9291	1552	0.0901016	6	39813665	39825000	C19orf12	-0.0775924	0.792241	-0.252497	0.435164	-0.00953331	0.971256	0.165371	0.508155
AM	SNV	GATK	6	39826792	39826792	G	A	MA0154.4 EBF1	-11	revcomp	cacCcccagggaagt	-11	revcomp	cacTcccagggaagt	1.79037e-05	0.000143594	0.124683	ENSSSCG00000032153	6:39826551-39827051	6	39826551	39827051	102.667	26.3475	26.9291	100	26.9291	1552	0.0901016	6	39813665	39825000	C19orf12	-0.0775924	0.792241	-0.252497	0.435164	-0.00953331	0.971256	0.165371	0.508155
AM	SNV	GATK	6	39826792	39826792	G	A	MA0815.1 TFAP2C	-9	direct	ttccctgggGgtg	-9	direct	ttccctgggAgtg	0.000354618	0.0045491	0.0779534	ENSSSCG00000032153	6:39826551-39827051	6	39826551	39827051	102.667	26.3475	26.9291	100	26.9291	1552	0.0901016	6	39813665	39825000	C19orf12	-0.0775924	0.792241	-0.252497	0.435164	-0.00953331	0.971256	0.165371	0.508155
AM	SNV	GATK	6	39826792	39826792	G	A	MA0735.1 GLIS1	-11	revcomp	acacCcccagggaagt	-11	revcomp	acacTcccagggaagt	0.000295205	0.00210978	0.139922	ENSSSCG00000032153	6:39826551-39827051	6	39826551	39827051	102.667	26.3475	26.9291	100	26.9291	1552	0.0901016	6	39813665	39825000	C19orf12	-0.0775924	0.792241	-0.252497	0.435164	-0.00953331	0.971256	0.165371	0.508155
AM	SNV	GATK	6	39826792	39826792	G	A	MA0736.1 GLIS2	-10	revcomp	cacCcccagggaag	-10	revcomp	cacTcccagggaag	6.36093e-05	0.00090785	0.0700659	ENSSSCG00000032153	6:39826551-39827051	6	39826551	39827051	102.667	26.3475	26.9291	100	26.9291	1552	0.0901016	6	39813665	39825000	C19orf12	-0.0775924	0.792241	-0.252497	0.435164	-0.00953331	0.971256	0.165371	0.508155
AM	SNV	GATK	6	39826792	39826792	G	A	MA0524.2 TFAP2C	-9	revcomp	acCcccagggaa	-9	revcomp	acTcccagggaa	0.000339508	0.00503516	0.0674274	ENSSSCG00000032153	6:39826551-39827051	6	39826551	39827051	102.667	26.3475	26.9291	100	26.9291	1552	0.0901016	6	39813665	39825000	C19orf12	-0.0775924	0.792241	-0.252497	0.435164	-0.00953331	0.971256	0.165371	0.508155
AM	SNV	GATK	6	39826792	39826792	G	A	MA1569.1 TFAP2E	-8	revcomp	acCcccaggga	-9	revcomp	cTcccagggaa	0.00049448	0.00808406	0.0611673	ENSSSCG00000032153	6:39826551-39827051	6	39826551	39827051	102.667	26.3475	26.9291	100	26.9291	1552	0.0901016	6	39813665	39825000	C19orf12	-0.0775924	0.792241	-0.252497	0.435164	-0.00953331	0.971256	0.165371	0.508155
AM	SNV	GATK	6	39826792	39826792	G	A	MA0737.1 GLIS3	-10	revcomp	cacCcccagggaag	-10	revcomp	cacTcccagggaag	0.000153899	0.00141685	0.108621	ENSSSCG00000032153	6:39826551-39827051	6	39826551	39827051	102.667	26.3475	26.9291	100	26.9291	1552	0.0901016	6	39813665	39825000	C19orf12	-0.0775924	0.792241	-0.252497	0.435164	-0.00953331	0.971256	0.165371	0.508155
AM	SNV	GATK	6	39826792	39826792	G	A	MA0872.1 TFAP2A	-9	direct	ttccctgggGgtg	-9	direct	ttccctgggAgtg	0.000311092	0.00421025	0.0738891	ENSSSCG00000032153	6:39826551-39827051	6	39826551	39827051	102.667	26.3475	26.9291	100	26.9291	1552	0.0901016	6	39813665	39825000	C19orf12	-0.0775924	0.792241	-0.252497	0.435164	-0.00953331	0.971256	0.165371	0.508155
AM	SNV	GATK	6	89599678	89599678	G	A	MA1516.1 KLF3	-6	direct	ggccgcGcgct	-6	direct	ggccgcAcgct	0.000150442	0.00143862	0.104574	ENSSSCG00000025344	6:89599474-89599974	6	89599474	89599974	319.667	5.37911	21.5746	23.6058	21.5746	85298	0.029304	6	89574035	89685272	PHC2	-0.313927	0.370376	-0.150793	0.695208	0.144196	0.647289	-0.0189379	0.949235
AM	SNV	GATK	6	89599678	89599678	G	A	MA1712.1 ZNF454	-12	revcomp	aagcgCgcggcccggctt	-12	revcomp	aagcgTgcggcccggctt	0.000371244	0.0040396	0.0919011	ENSSSCG00000025344	6:89599474-89599974	6	89599474	89599974	319.667	5.37911	21.5746	23.6058	21.5746	85298	0.029304	6	89574035	89685272	PHC2	-0.313927	0.370376	-0.150793	0.695208	0.144196	0.647289	-0.0189379	0.949235
AM	SNV	GATK	6	89599678	89599678	G	A	MA1650.1 ZBTB14	-6	direct	ggccgcGcgctt	-8	direct	cgggccgcAcgc	0.000376284	0.00348014	0.108123	ENSSSCG00000025344	6:89599474-89599974	6	89599474	89599974	319.667	5.37911	21.5746	23.6058	21.5746	85298	0.029304	6	89574035	89685272	PHC2	-0.313927	0.370376	-0.150793	0.695208	0.144196	0.647289	-0.0189379	0.949235
AM	SNV	GATK	7	54455469	54455469	C	T	MA1112.2 NR4A1	-7	revcomp	agagGggtcagg	-7	revcomp	agagAggtcagg	0.00421268	0.000368774	11.4235	ENSSSCG00000001832	7:54455151-54455651	7	54455151	54455651	89.6667	14.1438	10.0163	45.3443	10.0163	5336	0.0447458	7	54449816	54519194	ACAN	-0.566269	0.611489	-0.944699	0.440302	-1.21219	0.226649	-0.833756	0.378301
AM	SNV	GATK	7	54455469	54455469	C	T	MA0071.1 RORA	-5	revcomp	agagGggtca	-5	revcomp	agagAggtca	0.00121021	0.000145912	8.29412	ENSSSCG00000001832	7:54455151-54455651	7	54455151	54455651	89.6667	14.1438	10.0163	45.3443	10.0163	5336	0.0447458	7	54449816	54519194	ACAN	-0.566269	0.611489	-0.944699	0.440302	-1.21219	0.226649	-0.833756	0.378301
AM	SNV	GATK	7	54455469	54455469	C	T	MA0029.1 Mecom	-3	revcomp	tagacaagagGggt	-3	revcomp	tagacaagagAggt	0.00172864	0.000204343	8.4595	ENSSSCG00000001832	7:54455151-54455651	7	54455151	54455651	89.6667	14.1438	10.0163	45.3443	10.0163	5336	0.0447458	7	54449816	54519194	ACAN	-0.566269	0.611489	-0.944699	0.440302	-1.21219	0.226649	-0.833756	0.378301
AM	SNV	GATK	7	54455469	54455469	C	T	MA0160.2 NR4A2	-5	revcomp	agagGggtca	-5	revcomp	agagAggtca	0.00491524	0.000392914	12.5097	ENSSSCG00000001832	7:54455151-54455651	7	54455151	54455651	89.6667	14.1438	10.0163	45.3443	10.0163	5336	0.0447458	7	54449816	54519194	ACAN	-0.566269	0.611489	-0.944699	0.440302	-1.21219	0.226649	-0.833756	0.378301
AM	SNV	GATK	7	54455469	54455469	C	T	MA1111.1 NR2F2	-7	revcomp	gagGggtcagg	-7	revcomp	gagAggtcagg	0.00225997	0.000149965	15.07	ENSSSCG00000001832	7:54455151-54455651	7	54455151	54455651	89.6667	14.1438	10.0163	45.3443	10.0163	5336	0.0447458	7	54449816	54519194	ACAN	-0.566269	0.611489	-0.944699	0.440302	-1.21219	0.226649	-0.833756	0.378301
AM	SNV	GATK	7	54455469	54455469	C	T	MA1996.1 Nr1H2	-7	revcomp	gagGggtcagg	-7	revcomp	gagAggtcagg	0.00214362	0.000109196	19.631	ENSSSCG00000001832	7:54455151-54455651	7	54455151	54455651	89.6667	14.1438	10.0163	45.3443	10.0163	5336	0.0447458	7	54449816	54519194	ACAN	-0.566269	0.611489	-0.944699	0.440302	-1.21219	0.226649	-0.833756	0.378301
AM	SNV	GATK	7	54455469	54455469	C	T	MA1731.1 ZNF768	-10	direct	gaccctgaccCctcttgt	-10	direct	gaccctgaccTctcttgt	0.00181631	0.000165635	10.9658	ENSSSCG00000001832	7:54455151-54455651	7	54455151	54455651	89.6667	14.1438	10.0163	45.3443	10.0163	5336	0.0447458	7	54449816	54519194	ACAN	-0.566269	0.611489	-0.944699	0.440302	-1.21219	0.226649	-0.833756	0.378301
AM	SNV	GATK	7	54455469	54455469	C	T	MA1541.1 NR6A1	-12	revcomp	agagGggtcagggtcgt	-12	revcomp	agagAggtcagggtcgt	0.00252406	0.000412711	6.11581	ENSSSCG00000001832	7:54455151-54455651	7	54455151	54455651	89.6667	14.1438	10.0163	45.3443	10.0163	5336	0.0447458	7	54449816	54519194	ACAN	-0.566269	0.611489	-0.944699	0.440302	-1.21219	0.226649	-0.833756	0.378301
AM	SNV	GATK	7	54455469	54455469	C	T	MA1712.1 ZNF454	-16	revcomp	gGggtcagggtcgtgctg	-16	revcomp	gAggtcagggtcgtgctg	0.000167479	0.00149979	0.111669	ENSSSCG00000001832	7:54455151-54455651	7	54455151	54455651	89.6667	14.1438	10.0163	45.3443	10.0163	5336	0.0447458	7	54449816	54519194	ACAN	-0.566269	0.611489	-0.944699	0.440302	-1.21219	0.226649	-0.833756	0.378301
AM	SNV	GATK	9	130884220	130884220	T	G	MA0150.2 Nfe2l2	-9	direct	cagaaatacTcagcc	-9	direct	cagaaatacGcagcc	0.000343365	0.00241787	0.142011	ENSSSCG00000038855	9:130883832-130884332	9	130883832	130884332	129.5	13.679	12.5863	59.2005	12.5863	19893	0.0479972	9	130904225	130904330	U6	-0.467876	0.924011	-0.450901	0.933285	0.519476	0.906187	0.502502	0.90388
AM	SNV	GATK	9	130884220	130884220	T	G	MA0591.1 Bach1::Mafk	-8	direct	agaaatacTcagccc	-8	direct	agaaatacGcagccc	0.00041702	0.00327833	0.127205	ENSSSCG00000038855	9:130883832-130884332	9	130883832	130884332	129.5	13.679	12.5863	59.2005	12.5863	19893	0.0479972	9	130904225	130904330	U6	-0.467876	0.924011	-0.450901	0.933285	0.519476	0.906187	0.502502	0.90388
AM	SNV	GATK	9	136673311	136673311	C	G	MA0734.3 Gli2	-3	revcomp	gggaacaccGggt	-3	revcomp	gggaacaccCggt	0.00414306	0.000483647	8.56629	ENSSSCG00000020248	9:136673091-136673591	9	136673091	136673591	134.167	12.4954	31.4155	47.8507	31.4155	40801	0.0386563	9	136714285	136714392	U6	-0.317996	0.941301	-0.0886701	0.985048	-0.000654421	0.999864	-0.229981	0.949383
AM	SNV	GATK	9	136673311	136673311	C	G	MA0101.1 REL	0	direct	Cggtgttccc	-1	direct	cGggtgttcc	0.00190353	0.00014019	13.5782	ENSSSCG00000020248	9:136673091-136673591	9	136673091	136673591	134.167	12.4954	31.4155	47.8507	31.4155	40801	0.0386563	9	136714285	136714392	U6	-0.317996	0.941301	-0.0886701	0.985048	-0.000654421	0.999864	-0.229981	0.949383
AM	SNV	GATK	9	136681832	136681832	C	A	MA1956.1 FOXO1::FLI1	-2	revcomp	ggaagcagggaGct	-12	direct	ttctgcaggaagAt	0.000424437	0.00225729	0.188029	ENSSSCG00000015631	9:136681817-136682317	9	136681817	136682317	212	7.3201	24.9588	26.5139	24.9588	59439	0.020966	9	136580362	136741756	GRB10	0.175573	0.410045	0.398184	0.0890408	0.293875	0.125342	0.0712642	0.693582
AM	SNV	GATK	9	136681832	136681832	C	A	MA1102.2 CTCFL	-3	revcomp	agcagggaGctt	-3	revcomp	agcagggaTctt	0.000334084	0.00380254	0.0878582	ENSSSCG00000015631	9:136681817-136682317	9	136681817	136682317	212	7.3201	24.9588	26.5139	24.9588	59439	0.020966	9	136580362	136741756	GRB10	0.175573	0.410045	0.398184	0.0890408	0.293875	0.125342	0.0712642	0.693582
AM	SNV	GATK	9	136681832	136681832	C	A	MA1946.1 ETV5::FOXI1	-1	revcomp	ggaagcagggaGc	-1	revcomp	ggaagcagggaTc	0.00018312	0.00193812	0.0944835	ENSSSCG00000015631	9:136681817-136682317	9	136681817	136682317	212	7.3201	24.9588	26.5139	24.9588	59439	0.020966	9	136580362	136741756	GRB10	0.175573	0.410045	0.398184	0.0890408	0.293875	0.125342	0.0712642	0.693582
AM	SNV	GATK	9	136681832	136681832	C	A	MA1684.1 Foxn1	-5	direct	ggaagC	-5	direct	ggaagA	0.000488281	0.00976562	0.05	ENSSSCG00000015631	9:136681817-136682317	9	136681817	136682317	212	7.3201	24.9588	26.5139	24.9588	59439	0.020966	9	136580362	136741756	GRB10	0.175573	0.410045	0.398184	0.0890408	0.293875	0.125342	0.0712642	0.693582
AM	SNV	GATK	9	136681832	136681832	C	A	MA1956.1 FOXO1::FLI1	-2	revcomp	ggaagcagggaGct	-12	direct	ttctgcaggaagAt	0.000424437	0.00225729	0.188029	ENSSSCG00000023303	9:136681817-136682317	9	136681817	136682317	212	5.45344	18.5942	28.366	18.5942	193606	0.0268347	9	136484216	136488250	FIGNL1	0.279516	0.468641	0.368916	0.385137	0.0865028	0.803712	-0.00289682	0.992951
AM	SNV	GATK	9	136681832	136681832	C	A	MA1102.2 CTCFL	-3	revcomp	agcagggaGctt	-3	revcomp	agcagggaTctt	0.000334084	0.00380254	0.0878582	ENSSSCG00000023303	9:136681817-136682317	9	136681817	136682317	212	5.45344	18.5942	28.366	18.5942	193606	0.0268347	9	136484216	136488250	FIGNL1	0.279516	0.468641	0.368916	0.385137	0.0865028	0.803712	-0.00289682	0.992951
AM	SNV	GATK	9	136681832	136681832	C	A	MA1946.1 ETV5::FOXI1	-1	revcomp	ggaagcagggaGc	-1	revcomp	ggaagcagggaTc	0.00018312	0.00193812	0.0944835	ENSSSCG00000023303	9:136681817-136682317	9	136681817	136682317	212	5.45344	18.5942	28.366	18.5942	193606	0.0268347	9	136484216	136488250	FIGNL1	0.279516	0.468641	0.368916	0.385137	0.0865028	0.803712	-0.00289682	0.992951
AM	SNV	GATK	9	136681832	136681832	C	A	MA1684.1 Foxn1	-5	direct	ggaagC	-5	direct	ggaagA	0.000488281	0.00976562	0.05	ENSSSCG00000023303	9:136681817-136682317	9	136681817	136682317	212	5.45344	18.5942	28.366	18.5942	193606	0.0268347	9	136484216	136488250	FIGNL1	0.279516	0.468641	0.368916	0.385137	0.0865028	0.803712	-0.00289682	0.992951
AM	SNV	GATK	9	136682179	136682179	C	T	MA1992.1 Ikzf3	-5	revcomp	aggcaggacGcggtg	-5	revcomp	aggcaggacAcggtg	0.000188898	0.00172041	0.109798	ENSSSCG00000023303	9:136681817-136682317	9	136681817	136682317	212	5.45344	18.5942	28.366	18.5942	193606	0.0268347	9	136484216	136488250	FIGNL1	0.279516	0.468641	0.368916	0.385137	0.0865028	0.803712	-0.00289682	0.992951
AM	SNV	GATK	9	136682179	136682179	C	T	MA0597.2 THAP1	-2	revcomp	aggcaggacGcg	-2	revcomp	aggcaggacAcg	0.00324142	0.000229836	14.1032	ENSSSCG00000023303	9:136681817-136682317	9	136681817	136682317	212	5.45344	18.5942	28.366	18.5942	193606	0.0268347	9	136484216	136488250	FIGNL1	0.279516	0.468641	0.368916	0.385137	0.0865028	0.803712	-0.00289682	0.992951
AM	SNV	GATK	9	136682179	136682179	C	T	MA1961.1 PATZ1	-9	revcomp	acGcggtggggc	-9	revcomp	acAcggtggggc	0.000191927	0.00107366	0.17876	ENSSSCG00000023303	9:136681817-136682317	9	136681817	136682317	212	5.45344	18.5942	28.366	18.5942	193606	0.0268347	9	136484216	136488250	FIGNL1	0.279516	0.468641	0.368916	0.385137	0.0865028	0.803712	-0.00289682	0.992951
AM	SNV	GATK	9	136682179	136682179	C	T	MA1491.2 GLI3	-1	revcomp	agcccaggcaggacGc	-1	revcomp	agcccaggcaggacAc	0.000472729	0.0032023	0.147621	ENSSSCG00000023303	9:136681817-136682317	9	136681817	136682317	212	5.45344	18.5942	28.366	18.5942	193606	0.0268347	9	136484216	136488250	FIGNL1	0.279516	0.468641	0.368916	0.385137	0.0865028	0.803712	-0.00289682	0.992951
AM	SNV	GATK	9	136682179	136682179	C	T	MA1684.1 Foxn1	-1	revcomp	ggacGc	-1	revcomp	ggacAc	0.000244141	0.00634766	0.0384615	ENSSSCG00000023303	9:136681817-136682317	9	136681817	136682317	212	5.45344	18.5942	28.366	18.5942	193606	0.0268347	9	136484216	136488250	FIGNL1	0.279516	0.468641	0.368916	0.385137	0.0865028	0.803712	-0.00289682	0.992951
AM	SNV	GATK	9	136682179	136682179	C	T	MA0736.1 GLIS2	-9	direct	gccccaccgCgtcc	-9	direct	gccccaccgTgtcc	0.000315469	0.0024744	0.127493	ENSSSCG00000023303	9:136681817-136682317	9	136681817	136682317	212	5.45344	18.5942	28.366	18.5942	193606	0.0268347	9	136484216	136488250	FIGNL1	0.279516	0.468641	0.368916	0.385137	0.0865028	0.803712	-0.00289682	0.992951
AM	SNV	GATK	9	136682179	136682179	C	T	MA1575.1 THRB	-1	direct	gCgtcctgcctgggctccc	-1	direct	gTgtcctgcctgggctccc	0.00194123	0.000339811	5.71268	ENSSSCG00000023303	9:136681817-136682317	9	136681817	136682317	212	5.45344	18.5942	28.366	18.5942	193606	0.0268347	9	136484216	136488250	FIGNL1	0.279516	0.468641	0.368916	0.385137	0.0865028	0.803712	-0.00289682	0.992951
AM	SNV	GATK	9	136682179	136682179	C	T	MA1992.1 Ikzf3	-5	revcomp	aggcaggacGcggtg	-5	revcomp	aggcaggacAcggtg	0.000188898	0.00172041	0.109798	ENSSSCG00000015631	9:136681817-136682317	9	136681817	136682317	212	7.3201	24.9588	26.5139	24.9588	59439	0.020966	9	136580362	136741756	GRB10	0.175573	0.410045	0.398184	0.0890408	0.293875	0.125342	0.0712642	0.693582
AM	SNV	GATK	9	136682179	136682179	C	T	MA0597.2 THAP1	-2	revcomp	aggcaggacGcg	-2	revcomp	aggcaggacAcg	0.00324142	0.000229836	14.1032	ENSSSCG00000015631	9:136681817-136682317	9	136681817	136682317	212	7.3201	24.9588	26.5139	24.9588	59439	0.020966	9	136580362	136741756	GRB10	0.175573	0.410045	0.398184	0.0890408	0.293875	0.125342	0.0712642	0.693582
AM	SNV	GATK	9	136682179	136682179	C	T	MA1961.1 PATZ1	-9	revcomp	acGcggtggggc	-9	revcomp	acAcggtggggc	0.000191927	0.00107366	0.17876	ENSSSCG00000015631	9:136681817-136682317	9	136681817	136682317	212	7.3201	24.9588	26.5139	24.9588	59439	0.020966	9	136580362	136741756	GRB10	0.175573	0.410045	0.398184	0.0890408	0.293875	0.125342	0.0712642	0.693582
AM	SNV	GATK	9	136682179	136682179	C	T	MA1491.2 GLI3	-1	revcomp	agcccaggcaggacGc	-1	revcomp	agcccaggcaggacAc	0.000472729	0.0032023	0.147621	ENSSSCG00000015631	9:136681817-136682317	9	136681817	136682317	212	7.3201	24.9588	26.5139	24.9588	59439	0.020966	9	136580362	136741756	GRB10	0.175573	0.410045	0.398184	0.0890408	0.293875	0.125342	0.0712642	0.693582
AM	SNV	GATK	9	136682179	136682179	C	T	MA1684.1 Foxn1	-1	revcomp	ggacGc	-1	revcomp	ggacAc	0.000244141	0.00634766	0.0384615	ENSSSCG00000015631	9:136681817-136682317	9	136681817	136682317	212	7.3201	24.9588	26.5139	24.9588	59439	0.020966	9	136580362	136741756	GRB10	0.175573	0.410045	0.398184	0.0890408	0.293875	0.125342	0.0712642	0.693582
AM	SNV	GATK	9	136682179	136682179	C	T	MA0736.1 GLIS2	-9	direct	gccccaccgCgtcc	-9	direct	gccccaccgTgtcc	0.000315469	0.0024744	0.127493	ENSSSCG00000015631	9:136681817-136682317	9	136681817	136682317	212	7.3201	24.9588	26.5139	24.9588	59439	0.020966	9	136580362	136741756	GRB10	0.175573	0.410045	0.398184	0.0890408	0.293875	0.125342	0.0712642	0.693582
AM	SNV	GATK	9	136682179	136682179	C	T	MA1575.1 THRB	-1	direct	gCgtcctgcctgggctccc	-1	direct	gTgtcctgcctgggctccc	0.00194123	0.000339811	5.71268	ENSSSCG00000015631	9:136681817-136682317	9	136681817	136682317	212	7.3201	24.9588	26.5139	24.9588	59439	0.020966	9	136580362	136741756	GRB10	0.175573	0.410045	0.398184	0.0890408	0.293875	0.125342	0.0712642	0.693582
AM	SNV	GATK	9	33315452	33315452	C	T	MA1532.2 NR1D2	-12	direct	tgggtcggagggCtg	-12	direct	tgggtcggagggTtg	0.00263742	0.000457381	5.76635	ENSSSCG00000031429	9:33314964-33315464	9	33314964	33315464	97	3.01767	3.2627	19.6918	3.2627	485661	0.0206347	9	32811416	32925603	YAP1	0.0814873	0.826807	-0.159496	0.696501	0.163423	0.625419	0.404406	0.200698
AM	SNV	GATK	9	33315452	33315452	C	T	MA0775.1 MEIS3	0	direct	Ctgacagt	0	direct	Ttgacagt	0.000610352	0.000106812	5.71429	ENSSSCG00000031429	9:33314964-33315464	9	33314964	33315464	97	3.01767	3.2627	19.6918	3.2627	485661	0.0206347	9	32811416	32925603	YAP1	0.0814873	0.826807	-0.159496	0.696501	0.163423	0.625419	0.404406	0.200698
AM	SNV	GATK	9	33315452	33315452	C	T	MA0074.1 RXRA::VDR	-11	direct	gggtcggagggCtga	-11	direct	gggtcggagggTtga	0.000450095	3.19351e-05	14.0941	ENSSSCG00000031429	9:33314964-33315464	9	33314964	33315464	97	3.01767	3.2627	19.6918	3.2627	485661	0.0206347	9	32811416	32925603	YAP1	0.0814873	0.826807	-0.159496	0.696501	0.163423	0.625419	0.404406	0.200698
AM	SNV	GATK	9	33315452	33315452	C	T	MA0504.1 NR2C2	-13	direct	gtgggtcggagggCt	-13	direct	gtgggtcggagggTt	0.000171309	0.00111138	0.154141	ENSSSCG00000031429	9:33314964-33315464	9	33314964	33315464	97	3.01767	3.2627	19.6918	3.2627	485661	0.0206347	9	32811416	32925603	YAP1	0.0814873	0.826807	-0.159496	0.696501	0.163423	0.625419	0.404406	0.200698
ML	SNV	GATK	1	203938511	203938511	C	T	MA1961.1 PATZ1	-7	revcomp	agggGgagggga	-7	revcomp	agggAgagggga	1.26362e-05	0.000376582	0.0335549	ENSSSCG00000040366	1:203938095-203938595	1	203938095	203938595	76.3333	2.77996	5.80877	65.8474	5.80877	538320	0.056685	1	203936657	204942412	ADAMTSL1	-0.34486	0.651293	-0.0391939	0.962747	-0.646789	0.348076	-0.952455	0.142732
ML	SNV	GATK	1	203938511	203938511	C	T	MA0039.4 KLF4	-8	direct	ctcccctcCccc	-8	direct	ctcccctcTccc	3.3617e-05	0.000804901	0.0417654	ENSSSCG00000040366	1:203938095-203938595	1	203938095	203938595	76.3333	2.77996	5.80877	65.8474	5.80877	538320	0.056685	1	203936657	204942412	ADAMTSL1	-0.34486	0.651293	-0.0391939	0.962747	-0.646789	0.348076	-0.952455	0.142732
ML	SNV	GATK	1	203938511	203938511	C	T	MA0741.1 KLF16	-7	direct	tcccctcCccc	-7	direct	tcccctcTccc	8.05855e-05	0.00159359	0.0505685	ENSSSCG00000040366	1:203938095-203938595	1	203938095	203938595	76.3333	2.77996	5.80877	65.8474	5.80877	538320	0.056685	1	203936657	204942412	ADAMTSL1	-0.34486	0.651293	-0.0391939	0.962747	-0.646789	0.348076	-0.952455	0.142732
ML	SNV	GATK	1	203938511	203938511	C	T	MA1972.1 ZFP14	-14	revcomp	Ggaggggagggaagc	-14	revcomp	Agaggggagggaagc	0.000144874	0.000973484	0.14882	ENSSSCG00000040366	1:203938095-203938595	1	203938095	203938595	76.3333	2.77996	5.80877	65.8474	5.80877	538320	0.056685	1	203936657	204942412	ADAMTSL1	-0.34486	0.651293	-0.0391939	0.962747	-0.646789	0.348076	-0.952455	0.142732
ML	SNV	GATK	1	203938511	203938511	C	T	MA0079.5 SP1	-6	revcomp	ggGgagggg	-6	revcomp	ggAgagggg	1.14441e-05	0.000343323	0.0333333	ENSSSCG00000040366	1:203938095-203938595	1	203938095	203938595	76.3333	2.77996	5.80877	65.8474	5.80877	538320	0.056685	1	203936657	204942412	ADAMTSL1	-0.34486	0.651293	-0.0391939	0.962747	-0.646789	0.348076	-0.952455	0.142732
ML	SNV	GATK	1	203938511	203938511	C	T	MA0471.2 E2F6	-9	revcomp	gggGgaggggagg	-9	revcomp	gggAgaggggagg	0.000303358	0.00308271	0.0984063	ENSSSCG00000040366	1:203938095-203938595	1	203938095	203938595	76.3333	2.77996	5.80877	65.8474	5.80877	538320	0.056685	1	203936657	204942412	ADAMTSL1	-0.34486	0.651293	-0.0391939	0.962747	-0.646789	0.348076	-0.952455	0.142732
ML	SNV	GATK	1	203938511	203938511	C	T	MA0753.2 ZNF740	-9	direct	cctcccctcCccc	-9	direct	cctcccctcTccc	4.91738e-05	0.000803471	0.0612018	ENSSSCG00000040366	1:203938095-203938595	1	203938095	203938595	76.3333	2.77996	5.80877	65.8474	5.80877	538320	0.056685	1	203936657	204942412	ADAMTSL1	-0.34486	0.651293	-0.0391939	0.962747	-0.646789	0.348076	-0.952455	0.142732
ML	SNV	GATK	1	203938511	203938511	C	T	MA1653.1 ZNF148	-8	direct	ctcccctcCccc	-8	direct	ctcccctcTccc	2.38419e-07	1.0252e-05	0.0232558	ENSSSCG00000040366	1:203938095-203938595	1	203938095	203938595	76.3333	2.77996	5.80877	65.8474	5.80877	538320	0.056685	1	203936657	204942412	ADAMTSL1	-0.34486	0.651293	-0.0391939	0.962747	-0.646789	0.348076	-0.952455	0.142732
ML	SNV	GATK	1	203938511	203938511	C	T	MA0493.2 KLF1	-6	revcomp	ggGgagggg	-4	revcomp	agggAgagg	3.8147e-05	0.000537872	0.070922	ENSSSCG00000040366	1:203938095-203938595	1	203938095	203938595	76.3333	2.77996	5.80877	65.8474	5.80877	538320	0.056685	1	203936657	204942412	ADAMTSL1	-0.34486	0.651293	-0.0391939	0.962747	-0.646789	0.348076	-0.952455	0.142732
ML	SNV	GATK	1	203938511	203938511	C	T	MA0599.1 KLF5	-7	direct	tcccctcCcc	-5	direct	ccctcTccct	2.86102e-05	0.000455856	0.0627615	ENSSSCG00000040366	1:203938095-203938595	1	203938095	203938595	76.3333	2.77996	5.80877	65.8474	5.80877	538320	0.056685	1	203936657	204942412	ADAMTSL1	-0.34486	0.651293	-0.0391939	0.962747	-0.646789	0.348076	-0.952455	0.142732
ML	SNV	GATK	1	203938511	203938511	C	T	MA1630.2 ZNF281	-8	revcomp	gggGgaggggag	-8	revcomp	gggAgaggggag	1.78814e-07	1.07288e-05	0.0166667	ENSSSCG00000040366	1:203938095-203938595	1	203938095	203938595	76.3333	2.77996	5.80877	65.8474	5.80877	538320	0.056685	1	203936657	204942412	ADAMTSL1	-0.34486	0.651293	-0.0391939	0.962747	-0.646789	0.348076	-0.952455	0.142732
ML	SNV	GATK	1	203938511	203938511	C	T	MA0746.2 SP3	-8	direct	ctcccctcCccct	-6	direct	cccctcTcccttc	0.000348747	0.00365378	0.0954482	ENSSSCG00000040366	1:203938095-203938595	1	203938095	203938595	76.3333	2.77996	5.80877	65.8474	5.80877	538320	0.056685	1	203936657	204942412	ADAMTSL1	-0.34486	0.651293	-0.0391939	0.962747	-0.646789	0.348076	-0.952455	0.142732
ML	SNV	GATK	1	203938511	203938511	C	T	MA0516.3 SP2	-6	revcomp	ggGgagggg	-6	revcomp	ggAgagggg	3.8147e-05	0.000911713	0.041841	ENSSSCG00000040366	1:203938095-203938595	1	203938095	203938595	76.3333	2.77996	5.80877	65.8474	5.80877	538320	0.056685	1	203936657	204942412	ADAMTSL1	-0.34486	0.651293	-0.0391939	0.962747	-0.646789	0.348076	-0.952455	0.142732
ML	SNV	GATK	1	203938511	203938511	C	T	MA1959.1 KLF7	-6	revcomp	ggGgagggg	-4	revcomp	agggAgagg	8.7738e-05	0.00138474	0.0633609	ENSSSCG00000040366	1:203938095-203938595	1	203938095	203938595	76.3333	2.77996	5.80877	65.8474	5.80877	538320	0.056685	1	203936657	204942412	ADAMTSL1	-0.34486	0.651293	-0.0391939	0.962747	-0.646789	0.348076	-0.952455	0.142732
ML	SNV	GATK	1	203938511	203938511	C	T	MA0528.2 ZNF263	-7	revcomp	agggGgagggga	-9	revcomp	ggAgaggggagg	0.000169933	0.00184381	0.092164	ENSSSCG00000040366	1:203938095-203938595	1	203938095	203938595	76.3333	2.77996	5.80877	65.8474	5.80877	538320	0.056685	1	203936657	204942412	ADAMTSL1	-0.34486	0.651293	-0.0391939	0.962747	-0.646789	0.348076	-0.952455	0.142732
ML	SNV	GATK	1	203938511	203938511	C	T	MA0747.1 SP8	-7	direct	tcccctcCccct	-7	direct	tcccctcTccct	0.000157654	0.00285518	0.0552169	ENSSSCG00000040366	1:203938095-203938595	1	203938095	203938595	76.3333	2.77996	5.80877	65.8474	5.80877	538320	0.056685	1	203936657	204942412	ADAMTSL1	-0.34486	0.651293	-0.0391939	0.962747	-0.646789	0.348076	-0.952455	0.142732
ML	SNV	GATK	1	203938511	203938511	C	T	MA1511.2 KLF10	-6	revcomp	ggGgagggg	-6	revcomp	ggAgagggg	3.05176e-05	0.000770569	0.039604	ENSSSCG00000040366	1:203938095-203938595	1	203938095	203938595	76.3333	2.77996	5.80877	65.8474	5.80877	538320	0.056685	1	203936657	204942412	ADAMTSL1	-0.34486	0.651293	-0.0391939	0.962747	-0.646789	0.348076	-0.952455	0.142732
ML	SNV	GATK	1	203938511	203938511	C	T	MA1522.1 MAZ	-8	direct	ctcccctcCcc	-8	direct	ctcccctcTcc	2.86102e-06	0.000121832	0.0234834	ENSSSCG00000040366	1:203938095-203938595	1	203938095	203938595	76.3333	2.77996	5.80877	65.8474	5.80877	538320	0.056685	1	203936657	204942412	ADAMTSL1	-0.34486	0.651293	-0.0391939	0.962747	-0.646789	0.348076	-0.952455	0.142732
ML	SNV	GATK	1	203938511	203938511	C	T	MA0742.2 KLF12	-6	revcomp	ggGgagggg	-6	revcomp	ggAgagggg	5.72205e-05	0.00111008	0.0515464	ENSSSCG00000040366	1:203938095-203938595	1	203938095	203938595	76.3333	2.77996	5.80877	65.8474	5.80877	538320	0.056685	1	203936657	204942412	ADAMTSL1	-0.34486	0.651293	-0.0391939	0.962747	-0.646789	0.348076	-0.952455	0.142732
ML	SNV	GATK	1	203938511	203938511	C	T	MA1513.1 KLF15	-7	direct	tcccctcCccc	-7	direct	tcccctcTccc	0.000101089	0.00145721	0.0693717	ENSSSCG00000040366	1:203938095-203938595	1	203938095	203938595	76.3333	2.77996	5.80877	65.8474	5.80877	538320	0.056685	1	203936657	204942412	ADAMTSL1	-0.34486	0.651293	-0.0391939	0.962747	-0.646789	0.348076	-0.952455	0.142732
ML	SNV	GATK	1	203938511	203938511	C	T	MA1512.1 KLF11	-7	direct	tcccctcCccc	-7	direct	tcccctcTccc	0.000444651	0.00561094	0.079247	ENSSSCG00000040366	1:203938095-203938595	1	203938095	203938595	76.3333	2.77996	5.80877	65.8474	5.80877	538320	0.056685	1	203936657	204942412	ADAMTSL1	-0.34486	0.651293	-0.0391939	0.962747	-0.646789	0.348076	-0.952455	0.142732
ML	SNV	GATK	1	203938511	203938511	C	T	MA0685.2 SP4	-6	revcomp	ggGgagggg	-6	revcomp	ggAgagggg	1.52588e-05	0.000442505	0.0344828	ENSSSCG00000040366	1:203938095-203938595	1	203938095	203938595	76.3333	2.77996	5.80877	65.8474	5.80877	538320	0.056685	1	203936657	204942412	ADAMTSL1	-0.34486	0.651293	-0.0391939	0.962747	-0.646789	0.348076	-0.952455	0.142732
ML	SNV	GATK	10	1140343	1140343	C	T	MA1731.1 ZNF768	-3	revcomp	caggtcagcgtctcGgag	-14	direct	tgatattccctctcTgag	0.000217303	7.15381e-06	30.3759	ENSSSCG00000032416	10:1140259-1140759	10	1140259	1140759	101	10.9068	14.0162	38.1653	14.0162	10979	0.0369327	10	1147458	1151738	RGS1	0.183976	0.673415	-0.0755921	0.8747	0.130946	0.738738	0.390515	0.291993
ML	SNV	GATK	10	1140343	1140343	C	T	MA1531.1 NR1D1	-1	revcomp	aggtcagcgtctcGg	-1	revcomp	aggtcagcgtctcAg	0.00119926	0.000187977	6.37984	ENSSSCG00000032416	10:1140259-1140759	10	1140259	1140759	101	10.9068	14.0162	38.1653	14.0162	10979	0.0369327	10	1147458	1151738	RGS1	0.183976	0.673415	-0.0755921	0.8747	0.130946	0.738738	0.390515	0.291993
ML	SNV	GATK	10	1140343	1140343	C	T	MA0138.2 REST	-9	revcomp	gtcagcgtctcGgagagggaa	-9	revcomp	gtcagcgtctcAgagagggaa	0.000145159	0.00107426	0.135125	ENSSSCG00000032416	10:1140259-1140759	10	1140259	1140759	101	10.9068	14.0162	38.1653	14.0162	10979	0.0369327	10	1147458	1151738	RGS1	0.183976	0.673415	-0.0755921	0.8747	0.130946	0.738738	0.390515	0.291993
ML	SNV	GATK	13	12335528	12335528	T	C	MA1573.2 Thap11	-9	direct	actataattTtcac	-9	direct	actataattCtcac	0.000653792	6.31101e-05	10.3595	ENSSSCG00000011212	13:12335227-12335727	13	12335227	12335727	70.1667	27.712	28.0009	100	28.0009	1245	0.188543	13	12336972	12507680	RARB	-0.207622	0.628964	-0.056122	0.905402	0.118912	0.758176	-0.0325879	0.928709
ML	SNV	GATK	13	12335528	12335528	T	C	MA0802.1 TBR1	-3	revcomp	acgtgaAaat	-3	revcomp	acgtgaGaat	0.00330734	0.000491142	6.73398	ENSSSCG00000011212	13:12335227-12335727	13	12335227	12335727	70.1667	27.712	28.0009	100	28.0009	1245	0.188543	13	12336972	12507680	RARB	-0.207622	0.628964	-0.056122	0.905402	0.118912	0.758176	-0.0325879	0.928709
ML	SNV	GATK	13	12335528	12335528	T	C	MA0800.1 EOMES	-5	revcomp	aacgtgaAaatta	-5	revcomp	aacgtgaGaatta	0.0028549	0.000289574	9.85895	ENSSSCG00000011212	13:12335227-12335727	13	12335227	12335727	70.1667	27.712	28.0009	100	28.0009	1245	0.188543	13	12336972	12507680	RARB	-0.207622	0.628964	-0.056122	0.905402	0.118912	0.758176	-0.0325879	0.928709
ML	SNV	GATK	13	12335528	12335528	T	C	MA0772.1 IRF7	-3	revcomp	cccaacgtgaAaat	-3	revcomp	cccaacgtgaGaat	6.18435e-05	0.000827864	0.0747026	ENSSSCG00000011212	13:12335227-12335727	13	12335227	12335727	70.1667	27.712	28.0009	100	28.0009	1245	0.188543	13	12336972	12507680	RARB	-0.207622	0.628964	-0.056122	0.905402	0.118912	0.758176	-0.0325879	0.928709
ML	SNV	GATK	13	12335528	12335528	T	C	MA0690.2 TBX21	-3	direct	attTtcacgtt	-3	direct	attCtcacgtt	0.00210309	0.000233889	8.99185	ENSSSCG00000011212	13:12335227-12335727	13	12335227	12335727	70.1667	27.712	28.0009	100	28.0009	1245	0.188543	13	12336972	12507680	RARB	-0.207622	0.628964	-0.056122	0.905402	0.118912	0.758176	-0.0325879	0.928709
ML	SNV	GATK	13	31553590	31553590	G	A	MA0729.1 RARA	-6	direct	taagtgGaaaatgcaatg	-6	direct	taagtgAaaaatgcaatg	0.00284251	0.000475874	5.97324	ENSSSCG00000011363	13:31553109-31553609	13	31553109	31553609	373.5	7.22664	8.34243	21.9196	8.34243	35988	0.0398522	13	31426213	31517122	PRKAR2A	-0.16422	0.375803	-0.241646	0.235468	-0.147326	0.377246	-0.0699002	0.657226
ML	SNV	GATK	13	31553590	31553590	G	A	MA0846.1 FOXC2	-6	direct	taagtgGaaaat	-6	direct	taagtgAaaaat	0.00488287	0.000267506	18.2533	ENSSSCG00000011363	13:31553109-31553609	13	31553109	31553609	373.5	7.22664	8.34243	21.9196	8.34243	35988	0.0398522	13	31426213	31517122	PRKAR2A	-0.16422	0.375803	-0.241646	0.235468	-0.147326	0.377246	-0.0699002	0.657226
ML	SNV	GATK	13	31553590	31553590	G	A	MA0624.2 Nfatc1	-5	direct	aagtgGaaaatg	-5	direct	aagtgAaaaatg	1.72853e-05	0.000558674	0.0309399	ENSSSCG00000011363	13:31553109-31553609	13	31553109	31553609	373.5	7.22664	8.34243	21.9196	8.34243	35988	0.0398522	13	31426213	31517122	PRKAR2A	-0.16422	0.375803	-0.241646	0.235468	-0.147326	0.377246	-0.0699002	0.657226
ML	SNV	GATK	13	31553590	31553590	G	A	MA0676.1 Nr2e1	-7	direct	ataagtgGa	-7	direct	ataagtgAa	0.00607681	0.000366211	16.5938	ENSSSCG00000011363	13:31553109-31553609	13	31553109	31553609	373.5	7.22664	8.34243	21.9196	8.34243	35988	0.0398522	13	31426213	31517122	PRKAR2A	-0.16422	0.375803	-0.241646	0.235468	-0.147326	0.377246	-0.0699002	0.657226
ML	SNV	GATK	13	31553590	31553590	G	A	MA0606.2 Nfat5	-5	direct	aagtgGaaaatg	-5	direct	aagtgAaaaatg	1.63317e-05	0.000396788	0.0411597	ENSSSCG00000011363	13:31553109-31553609	13	31553109	31553609	373.5	7.22664	8.34243	21.9196	8.34243	35988	0.0398522	13	31426213	31517122	PRKAR2A	-0.16422	0.375803	-0.241646	0.235468	-0.147326	0.377246	-0.0699002	0.657226
ML	SNV	GATK	13	31553590	31553590	G	A	MA0517.1 STAT1::STAT2	-1	revcomp	tacattgcattttCc	-1	revcomp	tacattgcattttTc	0.000172153	0.000882963	0.194972	ENSSSCG00000011363	13:31553109-31553609	13	31553109	31553609	373.5	7.22664	8.34243	21.9196	8.34243	35988	0.0398522	13	31426213	31517122	PRKAR2A	-0.16422	0.375803	-0.241646	0.235468	-0.147326	0.377246	-0.0699002	0.657226
ML	SNV	GATK	13	31553590	31553590	G	A	MA1601.2 ZNF75D	-3	direct	gtgGaaaatgca	-3	direct	gtgAaaaatgca	0.000256181	0.00194043	0.132023	ENSSSCG00000011363	13:31553109-31553609	13	31553109	31553609	373.5	7.22664	8.34243	21.9196	8.34243	35988	0.0398522	13	31426213	31517122	PRKAR2A	-0.16422	0.375803	-0.241646	0.235468	-0.147326	0.377246	-0.0699002	0.657226
ML	SNV	GATK	13	31553590	31553590	G	A	MA0625.2 NFATC3	-3	direct	gtgGaaaat	-3	direct	gtgAaaaat	4.57764e-05	0.00364304	0.0125654	ENSSSCG00000011363	13:31553109-31553609	13	31553109	31553609	373.5	7.22664	8.34243	21.9196	8.34243	35988	0.0398522	13	31426213	31517122	PRKAR2A	-0.16422	0.375803	-0.241646	0.235468	-0.147326	0.377246	-0.0699002	0.657226
ML	SNV	GATK	13	31553590	31553590	G	A	MA0152.2 Nfatc2	-8	direct	aataagtgGaaaatgc	-8	direct	aataagtgAaaaatgc	6.30307e-05	0.00135691	0.0464517	ENSSSCG00000011363	13:31553109-31553609	13	31553109	31553609	373.5	7.22664	8.34243	21.9196	8.34243	35988	0.0398522	13	31426213	31517122	PRKAR2A	-0.16422	0.375803	-0.241646	0.235468	-0.147326	0.377246	-0.0699002	0.657226
ML	SNV	GATK	13	31553590	31553590	G	A	MA1525.2 NFATC4	-4	direct	agtgGaaaat	-4	direct	agtgAaaaat	2.47955e-05	0.000954628	0.025974	ENSSSCG00000011363	13:31553109-31553609	13	31553109	31553609	373.5	7.22664	8.34243	21.9196	8.34243	35988	0.0398522	13	31426213	31517122	PRKAR2A	-0.16422	0.375803	-0.241646	0.235468	-0.147326	0.377246	-0.0699002	0.657226
ML	SNV	GATK	13	38367567	38367567	C	T	MA0079.5 SP1	-6	revcomp	cgGgcgggg	-6	revcomp	cgAgcgggg	0.000110626	0.00151443	0.0730479	ENSSSCG00000024417	13:38367258-38367758	13	38367258	38367758	252.167	21.1538	41.2238	100	41.2238	0	0.861019	13	37388517	38367504	ERC2	0.280101	0.754856	-0.38619	0.693685	-0.906471	0.257285	-0.24018	0.752291
ML	SNV	GATK	13	38367567	38367567	C	T	MA0039.4 KLF4	-8	direct	ccccccgcCcgg	-10	direct	ggccccccgcTc	0.000166178	0.00108701	0.152876	ENSSSCG00000024417	13:38367258-38367758	13	38367258	38367758	252.167	21.1538	41.2238	100	41.2238	0	0.861019	13	37388517	38367504	ERC2	0.280101	0.754856	-0.38619	0.693685	-0.906471	0.257285	-0.24018	0.752291
ML	SNV	GATK	13	38367567	38367567	C	T	MA0599.1 KLF5	-7	direct	cccccgcCcg	-9	direct	gccccccgcT	7.9155e-05	0.000853539	0.0927374	ENSSSCG00000024417	13:38367258-38367758	13	38367258	38367758	252.167	21.1538	41.2238	100	41.2238	0	0.861019	13	37388517	38367504	ERC2	0.280101	0.754856	-0.38619	0.693685	-0.906471	0.257285	-0.24018	0.752291
ML	SNV	GATK	13	38367567	38367567	C	T	MA0742.2 KLF12	-6	revcomp	cgGgcgggg	-6	revcomp	cgAgcgggg	2.67029e-05	0.000629425	0.0424242	ENSSSCG00000024417	13:38367258-38367758	13	38367258	38367758	252.167	21.1538	41.2238	100	41.2238	0	0.861019	13	37388517	38367504	ERC2	0.280101	0.754856	-0.38619	0.693685	-0.906471	0.257285	-0.24018	0.752291
ML	SNV	GATK	13	38367567	38367567	C	T	MA0163.1 PLAG1	-6	revcomp	gcggccgGgcgggg	-6	revcomp	gcggccgAgcgggg	0.00032017	5.42104e-05	5.90606	ENSSSCG00000024417	13:38367258-38367758	13	38367258	38367758	252.167	21.1538	41.2238	100	41.2238	0	0.861019	13	37388517	38367504	ERC2	0.280101	0.754856	-0.38619	0.693685	-0.906471	0.257285	-0.24018	0.752291
ML	SNV	GATK	13	38367567	38367567	C	T	MA1938.1 ERF::NHLH1	-5	revcomp	cggagcggccgGgcggg	-5	revcomp	cggagcggccgAgcggg	0.000477228	0.00293941	0.162355	ENSSSCG00000024417	13:38367258-38367758	13	38367258	38367758	252.167	21.1538	41.2238	100	41.2238	0	0.861019	13	37388517	38367504	ERC2	0.280101	0.754856	-0.38619	0.693685	-0.906471	0.257285	-0.24018	0.752291
ML	SNV	GATK	13	38367567	38367567	C	T	MA0493.2 KLF1	-6	revcomp	cgGgcgggg	-6	revcomp	cgAgcgggg	2.67029e-05	0.00075531	0.0353535	ENSSSCG00000024417	13:38367258-38367758	13	38367258	38367758	252.167	21.1538	41.2238	100	41.2238	0	0.861019	13	37388517	38367504	ERC2	0.280101	0.754856	-0.38619	0.693685	-0.906471	0.257285	-0.24018	0.752291
ML	SNV	GATK	13	38367567	38367567	C	T	MA0471.2 E2F6	-9	revcomp	ccgGgcggggggc	-9	revcomp	ccgAgcggggggc	0.000488505	0.00468178	0.104342	ENSSSCG00000024417	13:38367258-38367758	13	38367258	38367758	252.167	21.1538	41.2238	100	41.2238	0	0.861019	13	37388517	38367504	ERC2	0.280101	0.754856	-0.38619	0.693685	-0.906471	0.257285	-0.24018	0.752291
ML	SNV	GATK	13	38367567	38367567	C	T	MA1630.2 ZNF281	-10	revcomp	gGgcggggggcc	-10	revcomp	gAgcggggggcc	0.000175178	0.0020957	0.0835893	ENSSSCG00000024417	13:38367258-38367758	13	38367258	38367758	252.167	21.1538	41.2238	100	41.2238	0	0.861019	13	37388517	38367504	ERC2	0.280101	0.754856	-0.38619	0.693685	-0.906471	0.257285	-0.24018	0.752291
ML	SNV	GATK	13	38367567	38367567	C	T	MA1522.1 MAZ	-8	direct	ccccccgcCcg	-10	direct	ggccccccgcT	0.000192642	0.00245524	0.0784618	ENSSSCG00000024417	13:38367258-38367758	13	38367258	38367758	252.167	21.1538	41.2238	100	41.2238	0	0.861019	13	37388517	38367504	ERC2	0.280101	0.754856	-0.38619	0.693685	-0.906471	0.257285	-0.24018	0.752291
ML	SNV	GATK	13	38367567	38367567	C	T	MA1959.1 KLF7	-6	revcomp	cgGgcgggg	-6	revcomp	cgAgcgggg	1.52588e-05	0.000579834	0.0263158	ENSSSCG00000024417	13:38367258-38367758	13	38367258	38367758	252.167	21.1538	41.2238	100	41.2238	0	0.861019	13	37388517	38367504	ERC2	0.280101	0.754856	-0.38619	0.693685	-0.906471	0.257285	-0.24018	0.752291
ML	SNV	GATK	13	38367567	38367567	C	T	MA1961.1 PATZ1	-7	revcomp	gccgGgcggggg	-7	revcomp	gccgAgcggggg	5.24521e-06	0.000196755	0.0266586	ENSSSCG00000024417	13:38367258-38367758	13	38367258	38367758	252.167	21.1538	41.2238	100	41.2238	0	0.861019	13	37388517	38367504	ERC2	0.280101	0.754856	-0.38619	0.693685	-0.906471	0.257285	-0.24018	0.752291
ML	SNV	GATK	13	38367567	38367567	C	T	MA0685.2 SP4	-6	revcomp	cgGgcgggg	-6	revcomp	cgAgcgggg	3.05176e-05	0.000762939	0.04	ENSSSCG00000024417	13:38367258-38367758	13	38367258	38367758	252.167	21.1538	41.2238	100	41.2238	0	0.861019	13	37388517	38367504	ERC2	0.280101	0.754856	-0.38619	0.693685	-0.906471	0.257285	-0.24018	0.752291
ML	SNV	GATK	13	38367567	38367567	C	T	MA1515.1 KLF2	-8	direct	ccccccgcCcg	-8	direct	ccccccgcTcg	0.000106335	0.00255513	0.0416161	ENSSSCG00000024417	13:38367258-38367758	13	38367258	38367758	252.167	21.1538	41.2238	100	41.2238	0	0.861019	13	37388517	38367504	ERC2	0.280101	0.754856	-0.38619	0.693685	-0.906471	0.257285	-0.24018	0.752291
ML	SNV	GATK	13	38367567	38367567	C	T	MA1712.1 ZNF454	-11	direct	gggccccccgcCcggccg	-11	direct	gggccccccgcTcggccg	5.0228e-05	0.000297007	0.169114	ENSSSCG00000024417	13:38367258-38367758	13	38367258	38367758	252.167	21.1538	41.2238	100	41.2238	0	0.861019	13	37388517	38367504	ERC2	0.280101	0.754856	-0.38619	0.693685	-0.906471	0.257285	-0.24018	0.752291
ML	SNV	GATK	13	38367567	38367567	C	T	MA1513.1 KLF15	-7	direct	cccccgcCcgg	-7	direct	cccccgcTcgg	1.54972e-05	0.000359058	0.0431607	ENSSSCG00000024417	13:38367258-38367758	13	38367258	38367758	252.167	21.1538	41.2238	100	41.2238	0	0.861019	13	37388517	38367504	ERC2	0.280101	0.754856	-0.38619	0.693685	-0.906471	0.257285	-0.24018	0.752291
ML	SNV	GATK	13	38367567	38367567	C	T	MA1511.2 KLF10	-6	revcomp	cgGgcgggg	-6	revcomp	cgAgcgggg	4.95911e-05	0.00100708	0.0492424	ENSSSCG00000024417	13:38367258-38367758	13	38367258	38367758	252.167	21.1538	41.2238	100	41.2238	0	0.861019	13	37388517	38367504	ERC2	0.280101	0.754856	-0.38619	0.693685	-0.906471	0.257285	-0.24018	0.752291
ML	SNV	GATK	13	38367567	38367567	C	T	MA1653.1 ZNF148	-8	direct	ccccccgcCcgg	-6	direct	ccccgcTcggcc	0.000142932	0.00134051	0.106625	ENSSSCG00000024417	13:38367258-38367758	13	38367258	38367758	252.167	21.1538	41.2238	100	41.2238	0	0.861019	13	37388517	38367504	ERC2	0.280101	0.754856	-0.38619	0.693685	-0.906471	0.257285	-0.24018	0.752291
ML	SNV	GATK	13	38367567	38367567	C	T	MA0516.3 SP2	-6	revcomp	cgGgcgggg	-6	revcomp	cgAgcgggg	3.8147e-05	0.000904083	0.0421941	ENSSSCG00000024417	13:38367258-38367758	13	38367258	38367758	252.167	21.1538	41.2238	100	41.2238	0	0.861019	13	37388517	38367504	ERC2	0.280101	0.754856	-0.38619	0.693685	-0.906471	0.257285	-0.24018	0.752291
ML	SNV	GATK	15	107690047	107690047	C	T	MA0796.1 TGIF1	0	revcomp	tggcagctcccG	0	revcomp	tggcagctcccA	0.00278151	0.000391662	7.10181	ENSSSCG00000016123	15:107690029-107690529	15	107690029	107690529	184.833	3.81564	8.44061	15.8138	8.44061	192303	0.0221652	15	107882832	108910662	PARD3B	-0.327153	0.38784	-0.379428	0.361852	-0.272	0.424716	-0.219725	0.494508
ML	SNV	GATK	15	107690047	107690047	C	T	MA0641.1 ELF4	-6	revcomp	ctcccGgaactg	-6	revcomp	ctcccAgaactg	0.000123739	0.00151789	0.0815205	ENSSSCG00000016123	15:107690029-107690529	15	107690029	107690529	184.833	3.81564	8.44061	15.8138	8.44061	192303	0.0221652	15	107882832	108910662	PARD3B	-0.327153	0.38784	-0.379428	0.361852	-0.272	0.424716	-0.219725	0.494508
ML	SNV	GATK	15	107690047	107690047	C	T	MA0076.2 ELK4	-7	direct	gcagttcCggg	-7	direct	gcagttcTggg	8.53539e-05	0.00186968	0.0456516	ENSSSCG00000016123	15:107690029-107690529	15	107690029	107690529	184.833	3.81564	8.44061	15.8138	8.44061	192303	0.0221652	15	107882832	108910662	PARD3B	-0.327153	0.38784	-0.379428	0.361852	-0.272	0.424716	-0.219725	0.494508
ML	SNV	GATK	15	107690047	107690047	C	T	MA1708.1 ETV7	-6	revcomp	tcccGgaactg	-6	revcomp	tcccAgaactg	0.000314474	0.00580406	0.0541817	ENSSSCG00000016123	15:107690029-107690529	15	107690029	107690529	184.833	3.81564	8.44061	15.8138	8.44061	192303	0.0221652	15	107882832	108910662	PARD3B	-0.327153	0.38784	-0.379428	0.361852	-0.272	0.424716	-0.219725	0.494508
ML	SNV	GATK	15	107690047	107690047	C	T	MA0797.1 TGIF2	0	direct	Cgggagctgcca	0	revcomp	tggcagctcccA	0.00216895	0.000317276	6.83618	ENSSSCG00000016123	15:107690029-107690529	15	107690029	107690529	184.833	3.81564	8.44061	15.8138	8.44061	192303	0.0221652	15	107882832	108910662	PARD3B	-0.327153	0.38784	-0.379428	0.361852	-0.272	0.424716	-0.219725	0.494508
ML	SNV	GATK	15	107690047	107690047	C	T	MA1483.2 ELF2	-6	revcomp	ctcccGgaactg	-6	revcomp	ctcccAgaactg	8.99434e-05	0.00174993	0.0513982	ENSSSCG00000016123	15:107690029-107690529	15	107690029	107690529	184.833	3.81564	8.44061	15.8138	8.44061	192303	0.0221652	15	107882832	108910662	PARD3B	-0.327153	0.38784	-0.379428	0.361852	-0.272	0.424716	-0.219725	0.494508
ML	SNV	GATK	15	107690047	107690047	C	T	MA0763.1 ETV3	-6	revcomp	cccGgaactg	-6	revcomp	cccAgaactg	0.000153542	0.00259876	0.0590826	ENSSSCG00000016123	15:107690029-107690529	15	107690029	107690529	184.833	3.81564	8.44061	15.8138	8.44061	192303	0.0221652	15	107882832	108910662	PARD3B	-0.327153	0.38784	-0.379428	0.361852	-0.272	0.424716	-0.219725	0.494508
ML	SNV	GATK	15	107690047	107690047	C	T	MA0759.2 ELK3	-7	revcomp	cccGgaactgc	-7	revcomp	cccAgaactgc	0.00015378	0.00230956	0.0665841	ENSSSCG00000016123	15:107690029-107690529	15	107690029	107690529	184.833	3.81564	8.44061	15.8138	8.44061	192303	0.0221652	15	107882832	108910662	PARD3B	-0.327153	0.38784	-0.379428	0.361852	-0.272	0.424716	-0.219725	0.494508
ML	SNV	GATK	15	107690047	107690047	C	T	MA1712.1 ZNF454	-9	revcomp	cagctcccGgaactgctg	-9	revcomp	cagctcccAgaactgctg	4.2703e-05	0.000391964	0.108946	ENSSSCG00000016123	15:107690029-107690529	15	107690029	107690529	184.833	3.81564	8.44061	15.8138	8.44061	192303	0.0221652	15	107882832	108910662	PARD3B	-0.327153	0.38784	-0.379428	0.361852	-0.272	0.424716	-0.219725	0.494508
ML	SNV	GATK	15	107690047	107690047	C	T	MA1938.1 ERF::NHLH1	-6	revcomp	ggcagctcccGgaactg	-6	revcomp	ggcagctcccAgaactg	4.11063e-07	6.38922e-06	0.0643369	ENSSSCG00000016123	15:107690029-107690529	15	107690029	107690529	184.833	3.81564	8.44061	15.8138	8.44061	192303	0.0221652	15	107882832	108910662	PARD3B	-0.327153	0.38784	-0.379428	0.361852	-0.272	0.424716	-0.219725	0.494508
ML	SNV	GATK	15	107690047	107690047	C	T	MA1625.1 Stat5b	-6	revcomp	cagctcccGgaactg	-6	revcomp	cagctcccAgaactg	0.000671809	5.68684e-05	11.8134	ENSSSCG00000016123	15:107690029-107690529	15	107690029	107690529	184.833	3.81564	8.44061	15.8138	8.44061	192303	0.0221652	15	107882832	108910662	PARD3B	-0.327153	0.38784	-0.379428	0.361852	-0.272	0.424716	-0.219725	0.494508
ML	SNV	GATK	15	107690047	107690047	C	T	MA1624.1 Stat5a	-5	revcomp	gctcccGgaact	-5	revcomp	gctcccAgaact	0.0011211	0.000177145	6.32873	ENSSSCG00000016123	15:107690029-107690529	15	107690029	107690529	184.833	3.81564	8.44061	15.8138	8.44061	192303	0.0221652	15	107882832	108910662	PARD3B	-0.327153	0.38784	-0.379428	0.361852	-0.272	0.424716	-0.219725	0.494508
ML	SNV	GATK	15	107690047	107690047	C	T	MA0764.3 ETV4	-6	revcomp	cccGgaactg	-6	revcomp	cccAgaactg	0.000179291	0.00340271	0.0526906	ENSSSCG00000016123	15:107690029-107690529	15	107690029	107690529	184.833	3.81564	8.44061	15.8138	8.44061	192303	0.0221652	15	107882832	108910662	PARD3B	-0.327153	0.38784	-0.379428	0.361852	-0.272	0.424716	-0.219725	0.494508
ML	SNV	GATK	15	107690047	107690047	C	T	MA0765.3 ETV5	-6	revcomp	cccGgaactg	-6	revcomp	cccAgaactg	0.000181198	0.00295067	0.0614092	ENSSSCG00000016123	15:107690029-107690529	15	107690029	107690529	184.833	3.81564	8.44061	15.8138	8.44061	192303	0.0221652	15	107882832	108910662	PARD3B	-0.327153	0.38784	-0.379428	0.361852	-0.272	0.424716	-0.219725	0.494508
ML	SNV	GATK	15	107690047	107690047	C	T	MA0098.3 ETS1	-6	revcomp	cccGgaactg	-6	revcomp	cccAgaactg	0.000247002	0.00423813	0.0582808	ENSSSCG00000016123	15:107690029-107690529	15	107690029	107690529	184.833	3.81564	8.44061	15.8138	8.44061	192303	0.0221652	15	107882832	108910662	PARD3B	-0.327153	0.38784	-0.379428	0.361852	-0.272	0.424716	-0.219725	0.494508
ML	SNV	GATK	15	107690047	107690047	C	T	MA1957.1 HOXB2::ELK1	-10	revcomp	cccGgaactgctga	-10	revcomp	cccAgaactgctga	0.000382744	0.00354255	0.108042	ENSSSCG00000016123	15:107690029-107690529	15	107690029	107690529	184.833	3.81564	8.44061	15.8138	8.44061	192303	0.0221652	15	107882832	108910662	PARD3B	-0.327153	0.38784	-0.379428	0.361852	-0.272	0.424716	-0.219725	0.494508
ML	SNV	GATK	15	107690047	107690047	C	T	MA1967.1 TFAP4::FLI1	-11	revcomp	tcccGgaactgctgag	-11	revcomp	tcccAgaactgctgag	0.000240081	0.00127781	0.187885	ENSSSCG00000016123	15:107690029-107690529	15	107690029	107690529	184.833	3.81564	8.44061	15.8138	8.44061	192303	0.0221652	15	107882832	108910662	PARD3B	-0.327153	0.38784	-0.379428	0.361852	-0.272	0.424716	-0.219725	0.494508
ML	SNV	GATK	15	107690047	107690047	C	T	MA0475.2 FLI1	-6	revcomp	cccGgaactg	-6	revcomp	cccAgaactg	0.00021553	0.00322819	0.0667651	ENSSSCG00000016123	15:107690029-107690529	15	107690029	107690529	184.833	3.81564	8.44061	15.8138	8.44061	192303	0.0221652	15	107882832	108910662	PARD3B	-0.327153	0.38784	-0.379428	0.361852	-0.272	0.424716	-0.219725	0.494508
ML	SNV	GATK	15	107690047	107690047	C	T	MA0750.2 ZBTB7A	-8	revcomp	tcccGgaactgct	-8	revcomp	tcccAgaactgct	9.49204e-05	0.00176568	0.0537584	ENSSSCG00000016123	15:107690029-107690529	15	107690029	107690529	184.833	3.81564	8.44061	15.8138	8.44061	192303	0.0221652	15	107882832	108910662	PARD3B	-0.327153	0.38784	-0.379428	0.361852	-0.272	0.424716	-0.219725	0.494508
ML	SNV	GATK	15	107690047	107690047	C	T	MA0645.1 ETV6	-6	revcomp	cccGgaactg	-6	revcomp	cccAgaactg	0.000289917	0.00452042	0.064135	ENSSSCG00000016123	15:107690029-107690529	15	107690029	107690529	184.833	3.81564	8.44061	15.8138	8.44061	192303	0.0221652	15	107882832	108910662	PARD3B	-0.327153	0.38784	-0.379428	0.361852	-0.272	0.424716	-0.219725	0.494508
ML	SNV	GATK	15	107690047	107690047	C	T	MA0760.1 ERF	-6	revcomp	cccGgaactg	-6	revcomp	cccAgaactg	0.00019455	0.00333309	0.0583691	ENSSSCG00000016123	15:107690029-107690529	15	107690029	107690529	184.833	3.81564	8.44061	15.8138	8.44061	192303	0.0221652	15	107882832	108910662	PARD3B	-0.327153	0.38784	-0.379428	0.361852	-0.272	0.424716	-0.219725	0.494508
ML	SNV	GATK	15	139921142	139921142	G	A	MA0815.1 TFAP2C	-9	revcomp	cccCgtgagggca	-7	revcomp	agcccTgtgaggg	0.000178978	0.00262716	0.0681259	ENSSSCG00000016378	15:139920825-139921325	15	139920825	139921325	73.8333	51.4537	9.69648	100	9.69648	3757	0.047675	15	139890178	139917069	PASK	0.365786	0.464533	0.814875	0.138407	-0.0194712	0.965538	-0.468561	0.270072
ML	SNV	GATK	15	139921142	139921142	G	A	MA0735.1 GLIS1	-11	direct	cgtgccctcacGgggc	-11	direct	cgtgccctcacAgggc	0.000474917	0.00306745	0.154825	ENSSSCG00000016378	15:139920825-139921325	15	139920825	139921325	73.8333	51.4537	9.69648	100	9.69648	3757	0.047675	15	139890178	139917069	PASK	0.365786	0.464533	0.814875	0.138407	-0.0194712	0.965538	-0.468561	0.270072
ML	SNV	GATK	15	139921142	139921142	G	A	MA0608.1 Creb3l2	-4	revcomp	gcccCgtga	-4	revcomp	gcccTgtga	0.000400543	0.0054779	0.0731198	ENSSSCG00000016378	15:139920825-139921325	15	139920825	139921325	73.8333	51.4537	9.69648	100	9.69648	3757	0.047675	15	139890178	139917069	PASK	0.365786	0.464533	0.814875	0.138407	-0.0194712	0.965538	-0.468561	0.270072
ML	SNV	GATK	15	139921142	139921142	G	A	MA1102.2 CTCFL	-5	direct	ctcacGgggctc	-3	direct	cacAgggctccc	0.00044024	0.0031932	0.137868	ENSSSCG00000016378	15:139920825-139921325	15	139920825	139921325	73.8333	51.4537	9.69648	100	9.69648	3757	0.047675	15	139890178	139917069	PASK	0.365786	0.464533	0.814875	0.138407	-0.0194712	0.965538	-0.468561	0.270072
ML	SNV	GATK	15	139921142	139921142	G	A	MA0872.1 TFAP2A	-9	direct	tgccctcacGggg	-7	revcomp	agcccTgtgaggg	0.000144139	0.00212243	0.0679122	ENSSSCG00000016378	15:139920825-139921325	15	139920825	139921325	73.8333	51.4537	9.69648	100	9.69648	3757	0.047675	15	139890178	139917069	PASK	0.365786	0.464533	0.814875	0.138407	-0.0194712	0.965538	-0.468561	0.270072
ML	SNV	GATK	15	139921142	139921142	G	A	MA1972.1 ZFP14	-7	revcomp	ggagcccCgtgaggg	-7	revcomp	ggagcccTgtgaggg	2.34842e-05	0.000153891	0.152603	ENSSSCG00000016378	15:139920825-139921325	15	139920825	139921325	73.8333	51.4537	9.69648	100	9.69648	3757	0.047675	15	139890178	139917069	PASK	0.365786	0.464533	0.814875	0.138407	-0.0194712	0.965538	-0.468561	0.270072
ML	SNV	GATK	15	139921142	139921142	G	A	MA1933.1 ELK1::SREBF2	-4	revcomp	gcagggagcccCgtga	-4	revcomp	gcagggagcccTgtga	0.000239847	0.00122748	0.195399	ENSSSCG00000016378	15:139920825-139921325	15	139920825	139921325	73.8333	51.4537	9.69648	100	9.69648	3757	0.047675	15	139890178	139917069	PASK	0.365786	0.464533	0.814875	0.138407	-0.0194712	0.965538	-0.468561	0.270072
ML	SNV	GATK	17	27263334	27263334	A	G	MA1418.1 IRF3	-10	direct	cttgaatggaAgcagattcca	-10	direct	cttgaatggaGgcagattcca	0.000417391	0.00286058	0.145912	ENSSSCG00000007100	17:27262871-27263371	17	27262871	27263371	98	19.9369	27.9946	100	27.9946	6722	0.249009	17	27270093	27780526	SLC24A3	0.148638	0.783161	0.828315	0.16305	-0.309066	0.525373	-0.988743	0.031171
ML	SNV	GATK	17	27263334	27263334	A	G	MA1593.1 ZNF317	-4	direct	tggaAgcagatt	-4	direct	tggaGgcagatt	0.000498474	0.00502312	0.0992358	ENSSSCG00000007100	17:27262871-27263371	17	27262871	27263371	98	19.9369	27.9946	100	27.9946	6722	0.249009	17	27270093	27780526	SLC24A3	0.148638	0.783161	0.828315	0.16305	-0.309066	0.525373	-0.988743	0.031171
ML	SNV	GATK	17	27263334	27263334	A	G	MA0152.2 Nfatc2	-10	direct	cttgaatggaAgcaga	-10	direct	cttgaatggaGgcaga	0.00030932	0.00417092	0.074161	ENSSSCG00000007100	17:27262871-27263371	17	27262871	27263371	98	19.9369	27.9946	100	27.9946	6722	0.249009	17	27270093	27780526	SLC24A3	0.148638	0.783161	0.828315	0.16305	-0.309066	0.525373	-0.988743	0.031171
ML	SNV	GATK	17	27263334	27263334	A	G	MA1525.2 NFATC4	-6	direct	aatggaAgca	-6	direct	aatggaGgca	0.000274658	0.005126	0.0535814	ENSSSCG00000007100	17:27262871-27263371	17	27262871	27263371	98	19.9369	27.9946	100	27.9946	6722	0.249009	17	27270093	27780526	SLC24A3	0.148638	0.783161	0.828315	0.16305	-0.309066	0.525373	-0.988743	0.031171
ML	SNV	GATK	17	27263334	27263334	A	G	MA1945.1 ETV5::FIGLA	-6	direct	aatggaAgcagattc	-6	direct	aatggaGgcagattc	0.000320597	0.00169421	0.18923	ENSSSCG00000007100	17:27262871-27263371	17	27262871	27263371	98	19.9369	27.9946	100	27.9946	6722	0.249009	17	27270093	27780526	SLC24A3	0.148638	0.783161	0.828315	0.16305	-0.309066	0.525373	-0.988743	0.031171
ML	SNV	GATK	17	28918019	28918019	T	C	MA1499.1 HOXB4	-4	revcomp	ctaAttaa	-4	revcomp	ctaGttaa	0.000366211	0.00653076	0.0560748	ENSSSCG00000007108	17:28917688-28918188	17	28917688	28918188	132.833	5.37003	13.652	24.5	13.652	62140	0.0416883	17	28980328	29082392	KIZ	0.0867457	0.733458	-0.190425	0.495902	0.163997	0.473252	0.441168	0.0412173
ML	SNV	GATK	17	28918019	28918019	T	C	MA1504.1 HOXC4	-4	revcomp	ctaAttaa	-4	revcomp	ctaGttaa	0.000396729	0.00592041	0.0670103	ENSSSCG00000007108	17:28917688-28918188	17	28917688	28918188	132.833	5.37003	13.652	24.5	13.652	62140	0.0416883	17	28980328	29082392	KIZ	0.0867457	0.733458	-0.190425	0.495902	0.163997	0.473252	0.441168	0.0412173
ML	SNV	GATK	17	28918019	28918019	T	C	MA1495.1 HOXA1	-4	direct	ttaaTtag	-4	direct	ttaaCtag	0.000183105	0.00527954	0.0346821	ENSSSCG00000007108	17:28917688-28918188	17	28917688	28918188	132.833	5.37003	13.652	24.5	13.652	62140	0.0416883	17	28980328	29082392	KIZ	0.0867457	0.733458	-0.190425	0.495902	0.163997	0.473252	0.441168	0.0412173
ML	SNV	GATK	17	28918019	28918019	T	C	MA0699.1 LBX2	-5	revcomp	actaAttaaa	-5	revcomp	actaGttaaa	6.48499e-05	0.00192261	0.0337302	ENSSSCG00000007108	17:28917688-28918188	17	28917688	28918188	132.833	5.37003	13.652	24.5	13.652	62140	0.0416883	17	28980328	29082392	KIZ	0.0867457	0.733458	-0.190425	0.495902	0.163997	0.473252	0.441168	0.0412173
ML	SNV	GATK	17	28918019	28918019	T	C	MA1500.1 HOXB6	-4	direct	ttaaTtag	-4	direct	ttaaCtag	0.000396729	0.00666809	0.0594966	ENSSSCG00000007108	17:28917688-28918188	17	28917688	28918188	132.833	5.37003	13.652	24.5	13.652	62140	0.0416883	17	28980328	29082392	KIZ	0.0867457	0.733458	-0.190425	0.495902	0.163997	0.473252	0.441168	0.0412173
ML	SNV	GATK	17	28918019	28918019	T	C	MA0706.1 MEOX2	-5	revcomp	actaAttaaa	-5	revcomp	actaGttaaa	3.52859e-05	0.0022068	0.0159896	ENSSSCG00000007108	17:28917688-28918188	17	28917688	28918188	132.833	5.37003	13.652	24.5	13.652	62140	0.0416883	17	28980328	29082392	KIZ	0.0867457	0.733458	-0.190425	0.495902	0.163997	0.473252	0.441168	0.0412173
ML	SNV	GATK	17	28918019	28918019	T	C	MA0716.1 PRRX1	-4	revcomp	ctaAttaa	-4	revcomp	ctaGttaa	1.52588e-05	0.00163269	0.00934579	ENSSSCG00000007108	17:28917688-28918188	17	28917688	28918188	132.833	5.37003	13.652	24.5	13.652	62140	0.0416883	17	28980328	29082392	KIZ	0.0867457	0.733458	-0.190425	0.495902	0.163997	0.473252	0.441168	0.0412173
ML	SNV	GATK	17	28918019	28918019	T	C	MA0717.1 RAX2	-4	revcomp	ctaAttaa	-4	revcomp	ctaGttaa	6.10352e-05	0.00274658	0.0222222	ENSSSCG00000007108	17:28917688-28918188	17	28917688	28918188	132.833	5.37003	13.652	24.5	13.652	62140	0.0416883	17	28980328	29082392	KIZ	0.0867457	0.733458	-0.190425	0.495902	0.163997	0.473252	0.441168	0.0412173
ML	SNV	GATK	17	28918019	28918019	T	C	MA0705.1 Lhx8	-4	revcomp	ctaAttaa	-4	revcomp	ctaGttaa	3.05176e-05	0.00297546	0.0102564	ENSSSCG00000007108	17:28917688-28918188	17	28917688	28918188	132.833	5.37003	13.652	24.5	13.652	62140	0.0416883	17	28980328	29082392	KIZ	0.0867457	0.733458	-0.190425	0.495902	0.163997	0.473252	0.441168	0.0412173
ML	SNV	GATK	17	28918019	28918019	T	C	MA0899.1 HOXA10	-6	revcomp	actaAttaaag	-6	revcomp	actaGttaaag	0.000462532	0.00544	0.0850243	ENSSSCG00000007108	17:28917688-28918188	17	28917688	28918188	132.833	5.37003	13.652	24.5	13.652	62140	0.0416883	17	28980328	29082392	KIZ	0.0867457	0.733458	-0.190425	0.495902	0.163997	0.473252	0.441168	0.0412173
ML	SNV	GATK	17	28918019	28918019	T	C	MA0903.1 HOXB3	-5	revcomp	actaAttaaa	-5	revcomp	actaGttaaa	1.52588e-05	0.00227165	0.00671704	ENSSSCG00000007108	17:28917688-28918188	17	28917688	28918188	132.833	5.37003	13.652	24.5	13.652	62140	0.0416883	17	28980328	29082392	KIZ	0.0867457	0.733458	-0.190425	0.495902	0.163997	0.473252	0.441168	0.0412173
ML	SNV	GATK	17	28918019	28918019	T	C	MA0125.1 Nobox	-3	direct	taaTtagt	-3	direct	taaCtagt	6.10352e-05	0.0015564	0.0392157	ENSSSCG00000007108	17:28917688-28918188	17	28917688	28918188	132.833	5.37003	13.652	24.5	13.652	62140	0.0416883	17	28980328	29082392	KIZ	0.0867457	0.733458	-0.190425	0.495902	0.163997	0.473252	0.441168	0.0412173
ML	SNV	GATK	17	28918019	28918019	T	C	MA0151.1 Arid3a	-5	revcomp	Attaaa	-5	revcomp	Gttaaa	0.000244141	0.00512695	0.047619	ENSSSCG00000007108	17:28917688-28918188	17	28917688	28918188	132.833	5.37003	13.652	24.5	13.652	62140	0.0416883	17	28980328	29082392	KIZ	0.0867457	0.733458	-0.190425	0.495902	0.163997	0.473252	0.441168	0.0412173
ML	SNV	GATK	17	28918019	28918019	T	C	MA0601.1 Arid3b	-7	direct	cctttaaTtag	-7	direct	cctttaaCtag	0.000408649	0.00609112	0.0670894	ENSSSCG00000007108	17:28917688-28918188	17	28917688	28918188	132.833	5.37003	13.652	24.5	13.652	62140	0.0416883	17	28980328	29082392	KIZ	0.0867457	0.733458	-0.190425	0.495902	0.163997	0.473252	0.441168	0.0412173
ML	SNV	GATK	17	28918019	28918019	T	C	MA0027.2 EN1	-4	revcomp	ctaAttaa	-4	revcomp	ctaGttaa	0.000106812	0.00346374	0.030837	ENSSSCG00000007108	17:28917688-28918188	17	28917688	28918188	132.833	5.37003	13.652	24.5	13.652	62140	0.0416883	17	28980328	29082392	KIZ	0.0867457	0.733458	-0.190425	0.495902	0.163997	0.473252	0.441168	0.0412173
ML	SNV	GATK	17	28918019	28918019	T	C	MA0658.1 LHX6	-5	revcomp	actaAttaaa	-5	revcomp	actaGttaaa	3.8147e-05	0.00124645	0.0306044	ENSSSCG00000007108	17:28917688-28918188	17	28917688	28918188	132.833	5.37003	13.652	24.5	13.652	62140	0.0416883	17	28980328	29082392	KIZ	0.0867457	0.733458	-0.190425	0.495902	0.163997	0.473252	0.441168	0.0412173
ML	SNV	GATK	17	28918019	28918019	T	C	MA0661.1 MEOX1	-5	revcomp	actaAttaaa	-5	revcomp	actaGttaaa	3.8147e-05	0.00183773	0.0207577	ENSSSCG00000007108	17:28917688-28918188	17	28917688	28918188	132.833	5.37003	13.652	24.5	13.652	62140	0.0416883	17	28980328	29082392	KIZ	0.0867457	0.733458	-0.190425	0.495902	0.163997	0.473252	0.441168	0.0412173
ML	SNV	GATK	17	28918019	28918019	T	C	MA0662.1 MIXL1	-5	revcomp	actaAttaaa	-5	revcomp	actaGttaaa	2.28882e-05	0.00235748	0.00970874	ENSSSCG00000007108	17:28917688-28918188	17	28917688	28918188	132.833	5.37003	13.652	24.5	13.652	62140	0.0416883	17	28980328	29082392	KIZ	0.0867457	0.733458	-0.190425	0.495902	0.163997	0.473252	0.441168	0.0412173
ML	SNV	GATK	17	28918019	28918019	T	C	MA0723.2 VAX2	-4	direct	ttaaTtag	-4	revcomp	ctaGttaa	7.62939e-05	0.00419617	0.0181818	ENSSSCG00000007108	17:28917688-28918188	17	28917688	28918188	132.833	5.37003	13.652	24.5	13.652	62140	0.0416883	17	28980328	29082392	KIZ	0.0867457	0.733458	-0.190425	0.495902	0.163997	0.473252	0.441168	0.0412173
ML	SNV	GATK	17	28918019	28918019	T	C	MA0768.2 Lef1	-10	direct	aagcctttaaTtag	-10	direct	aagcctttaaCtag	0.000249531	0.00252576	0.0987944	ENSSSCG00000007108	17:28917688-28918188	17	28917688	28918188	132.833	5.37003	13.652	24.5	13.652	62140	0.0416883	17	28980328	29082392	KIZ	0.0867457	0.733458	-0.190425	0.495902	0.163997	0.473252	0.441168	0.0412173
ML	SNV	GATK	17	28918019	28918019	T	C	MA0879.2 DLX1	-4	revcomp	ctaAttaa	-4	revcomp	ctaGttaa	0.000366211	0.008255	0.0443623	ENSSSCG00000007108	17:28917688-28918188	17	28917688	28918188	132.833	5.37003	13.652	24.5	13.652	62140	0.0416883	17	28980328	29082392	KIZ	0.0867457	0.733458	-0.190425	0.495902	0.163997	0.473252	0.441168	0.0412173
ML	SNV	GATK	17	28918019	28918019	T	C	MA1498.2 HOXA7	-4	revcomp	ctaAttaa	-4	revcomp	ctaGttaa	0.000305176	0.0065155	0.0468384	ENSSSCG00000007108	17:28917688-28918188	17	28917688	28918188	132.833	5.37003	13.652	24.5	13.652	62140	0.0416883	17	28980328	29082392	KIZ	0.0867457	0.733458	-0.190425	0.495902	0.163997	0.473252	0.441168	0.0412173
ML	SNV	GATK	17	28918019	28918019	T	C	MA0720.1 Shox2	-4	revcomp	ctaAttaa	-4	revcomp	ctaGttaa	6.10352e-05	0.00190735	0.032	ENSSSCG00000007108	17:28917688-28918188	17	28917688	28918188	132.833	5.37003	13.652	24.5	13.652	62140	0.0416883	17	28980328	29082392	KIZ	0.0867457	0.733458	-0.190425	0.495902	0.163997	0.473252	0.441168	0.0412173
ML	SNV	GATK	17	28918019	28918019	T	C	MA0793.1 POU6F2	-4	revcomp	cactaAttaa	-4	revcomp	cactaGttaa	0.000188828	0.00336075	0.0561862	ENSSSCG00000007108	17:28917688-28918188	17	28917688	28918188	132.833	5.37003	13.652	24.5	13.652	62140	0.0416883	17	28980328	29082392	KIZ	0.0867457	0.733458	-0.190425	0.495902	0.163997	0.473252	0.441168	0.0412173
ML	SNV	GATK	17	28918019	28918019	T	C	MA0853.1 Alx4	-9	revcomp	cccactaAttaaaggct	-9	revcomp	cccactaGttaaaggct	1.50386e-05	0.000424336	0.0354404	ENSSSCG00000007108	17:28917688-28918188	17	28917688	28918188	132.833	5.37003	13.652	24.5	13.652	62140	0.0416883	17	28980328	29082392	KIZ	0.0867457	0.733458	-0.190425	0.495902	0.163997	0.473252	0.441168	0.0412173
ML	SNV	GATK	17	28918019	28918019	T	C	MA0854.1 Alx1	-9	revcomp	cccactaAttaaaggct	-9	revcomp	cccactaGttaaaggct	3.2919e-05	0.000777949	0.0423151	ENSSSCG00000007108	17:28917688-28918188	17	28917688	28918188	132.833	5.37003	13.652	24.5	13.652	62140	0.0416883	17	28980328	29082392	KIZ	0.0867457	0.733458	-0.190425	0.495902	0.163997	0.473252	0.441168	0.0412173
ML	SNV	GATK	17	28918019	28918019	T	C	MA0874.1 Arx	-9	direct	agcctttaaTtagtggg	-9	direct	agcctttaaCtagtggg	1.12282e-05	0.0003452	0.0325266	ENSSSCG00000007108	17:28917688-28918188	17	28917688	28918188	132.833	5.37003	13.652	24.5	13.652	62140	0.0416883	17	28980328	29082392	KIZ	0.0867457	0.733458	-0.190425	0.495902	0.163997	0.473252	0.441168	0.0412173
ML	SNV	GATK	17	28918019	28918019	T	C	MA0880.1 Dlx3	-4	revcomp	ctaAttaa	-4	revcomp	ctaGttaa	0.000274658	0.00622559	0.0441176	ENSSSCG00000007108	17:28917688-28918188	17	28917688	28918188	132.833	5.37003	13.652	24.5	13.652	62140	0.0416883	17	28980328	29082392	KIZ	0.0867457	0.733458	-0.190425	0.495902	0.163997	0.473252	0.441168	0.0412173
ML	SNV	GATK	17	28918019	28918019	T	C	MA0881.1 Dlx4	-4	revcomp	ctaAttaa	-4	revcomp	ctaGttaa	0.000274658	0.00611877	0.0448878	ENSSSCG00000007108	17:28917688-28918188	17	28917688	28918188	132.833	5.37003	13.652	24.5	13.652	62140	0.0416883	17	28980328	29082392	KIZ	0.0867457	0.733458	-0.190425	0.495902	0.163997	0.473252	0.441168	0.0412173
ML	SNV	GATK	17	28918019	28918019	T	C	MA0882.1 DLX6	-4	revcomp	ctaAttaa	-4	revcomp	ctaGttaa	0.000152588	0.00450134	0.0338983	ENSSSCG00000007108	17:28917688-28918188	17	28917688	28918188	132.833	5.37003	13.652	24.5	13.652	62140	0.0416883	17	28980328	29082392	KIZ	0.0867457	0.733458	-0.190425	0.495902	0.163997	0.473252	0.441168	0.0412173
ML	SNV	GATK	17	28918019	28918019	T	C	MA0886.1 EMX2	-5	revcomp	actaAttaaa	-5	revcomp	actaGttaaa	0.000113487	0.00312519	0.0363137	ENSSSCG00000007108	17:28917688-28918188	17	28917688	28918188	132.833	5.37003	13.652	24.5	13.652	62140	0.0416883	17	28980328	29082392	KIZ	0.0867457	0.733458	-0.190425	0.495902	0.163997	0.473252	0.441168	0.0412173
ML	SNV	GATK	17	28918019	28918019	T	C	MA0887.1 EVX1	-5	revcomp	actaAttaaa	-5	revcomp	actaGttaaa	0.000333786	0.00786781	0.0424242	ENSSSCG00000007108	17:28917688-28918188	17	28917688	28918188	132.833	5.37003	13.652	24.5	13.652	62140	0.0416883	17	28980328	29082392	KIZ	0.0867457	0.733458	-0.190425	0.495902	0.163997	0.473252	0.441168	0.0412173
ML	SNV	GATK	17	28918019	28918019	T	C	MA0889.1 GBX1	-5	revcomp	actaAttaaa	-5	revcomp	actaGttaaa	0.000110626	0.00277328	0.03989	ENSSSCG00000007108	17:28917688-28918188	17	28917688	28918188	132.833	5.37003	13.652	24.5	13.652	62140	0.0416883	17	28980328	29082392	KIZ	0.0867457	0.733458	-0.190425	0.495902	0.163997	0.473252	0.441168	0.0412173
ML	SNV	GATK	17	28918019	28918019	T	C	MA0890.1 GBX2	-5	revcomp	actaAttaaa	-5	revcomp	actaGttaaa	0.000112534	0.00296688	0.0379299	ENSSSCG00000007108	17:28917688-28918188	17	28917688	28918188	132.833	5.37003	13.652	24.5	13.652	62140	0.0416883	17	28980328	29082392	KIZ	0.0867457	0.733458	-0.190425	0.495902	0.163997	0.473252	0.441168	0.0412173
ML	SNV	GATK	17	28918019	28918019	T	C	MA0894.1 HESX1	-5	direct	tttaaTtagt	-5	direct	tttaaCtagt	0.000123024	0.00304031	0.0404642	ENSSSCG00000007108	17:28917688-28918188	17	28917688	28918188	132.833	5.37003	13.652	24.5	13.652	62140	0.0416883	17	28980328	29082392	KIZ	0.0867457	0.733458	-0.190425	0.495902	0.163997	0.473252	0.441168	0.0412173
ML	SNV	GATK	17	28918019	28918019	T	C	MA0895.1 HMBOX1	-5	revcomp	actaAttaaa	-5	revcomp	actaGttaaa	0.000869751	1.62125e-05	53.6471	ENSSSCG00000007108	17:28917688-28918188	17	28917688	28918188	132.833	5.37003	13.652	24.5	13.652	62140	0.0416883	17	28980328	29082392	KIZ	0.0867457	0.733458	-0.190425	0.495902	0.163997	0.473252	0.441168	0.0412173
ML	SNV	GATK	17	28918019	28918019	T	C	MA0904.2 HOXB5	-4	direct	ttaaTtag	-4	direct	ttaaCtag	0.000183105	0.00488281	0.0375	ENSSSCG00000007108	17:28917688-28918188	17	28917688	28918188	132.833	5.37003	13.652	24.5	13.652	62140	0.0416883	17	28980328	29082392	KIZ	0.0867457	0.733458	-0.190425	0.495902	0.163997	0.473252	0.441168	0.0412173
ML	SNV	GATK	17	28918019	28918019	T	C	MA0912.2 HOXD3	-4	revcomp	ctaAttaa	-4	revcomp	ctaGttaa	9.15527e-05	0.00205994	0.0444444	ENSSSCG00000007108	17:28917688-28918188	17	28917688	28918188	132.833	5.37003	13.652	24.5	13.652	62140	0.0416883	17	28980328	29082392	KIZ	0.0867457	0.733458	-0.190425	0.495902	0.163997	0.473252	0.441168	0.0412173
ML	SNV	GATK	17	28918019	28918019	T	C	MA0701.2 LHX9	-4	revcomp	ctaAttaa	-4	revcomp	ctaGttaa	1.52588e-05	0.00088501	0.0172414	ENSSSCG00000007108	17:28917688-28918188	17	28917688	28918188	132.833	5.37003	13.652	24.5	13.652	62140	0.0416883	17	28980328	29082392	KIZ	0.0867457	0.733458	-0.190425	0.495902	0.163997	0.473252	0.441168	0.0412173
ML	SNV	GATK	17	28918019	28918019	T	C	MA0703.2 LMX1B	-7	direct	cctttaaTtag	-7	direct	cctttaaCtag	5.50747e-05	0.00112367	0.0490134	ENSSSCG00000007108	17:28917688-28918188	17	28917688	28918188	132.833	5.37003	13.652	24.5	13.652	62140	0.0416883	17	28980328	29082392	KIZ	0.0867457	0.733458	-0.190425	0.495902	0.163997	0.473252	0.441168	0.0412173
ML	SNV	GATK	17	28918019	28918019	T	C	MA0075.3 PRRX2	-4	revcomp	ctaAttaa	-4	revcomp	ctaGttaa	1.52588e-05	0.000854492	0.0178571	ENSSSCG00000007108	17:28917688-28918188	17	28917688	28918188	132.833	5.37003	13.652	24.5	13.652	62140	0.0416883	17	28980328	29082392	KIZ	0.0867457	0.733458	-0.190425	0.495902	0.163997	0.473252	0.441168	0.0412173
ML	SNV	GATK	17	28918019	28918019	T	C	MA0700.2 LHX2	-5	revcomp	cactaAttaaa	-5	revcomp	cactaGttaaa	0.000314713	0.00524378	0.0600164	ENSSSCG00000007108	17:28917688-28918188	17	28917688	28918188	132.833	5.37003	13.652	24.5	13.652	62140	0.0416883	17	28980328	29082392	KIZ	0.0867457	0.733458	-0.190425	0.495902	0.163997	0.473252	0.441168	0.0412173
ML	SNV	GATK	17	28918019	28918019	T	C	MA0642.2 EN2	-3	revcomp	actaAtta	-3	revcomp	actaGtta	0.000152588	0.0043335	0.0352113	ENSSSCG00000007108	17:28917688-28918188	17	28917688	28918188	132.833	5.37003	13.652	24.5	13.652	62140	0.0416883	17	28980328	29082392	KIZ	0.0867457	0.733458	-0.190425	0.495902	0.163997	0.473252	0.441168	0.0412173
ML	SNV	GATK	17	28918019	28918019	T	C	MA1505.1 HOXC8	-4	revcomp	ctaAttaa	-4	direct	ttaaCtag	0.000228882	0.00953674	0.024	ENSSSCG00000007108	17:28917688-28918188	17	28917688	28918188	132.833	5.37003	13.652	24.5	13.652	62140	0.0416883	17	28980328	29082392	KIZ	0.0867457	0.733458	-0.190425	0.495902	0.163997	0.473252	0.441168	0.0412173
ML	SNV	GATK	17	28918019	28918019	T	C	MA1507.1 HOXD4	-4	revcomp	ctaAttaa	-4	revcomp	ctaGttaa	0.000320435	0.00509644	0.0628743	ENSSSCG00000007108	17:28917688-28918188	17	28917688	28918188	132.833	5.37003	13.652	24.5	13.652	62140	0.0416883	17	28980328	29082392	KIZ	0.0867457	0.733458	-0.190425	0.495902	0.163997	0.473252	0.441168	0.0412173
ML	SNV	GATK	17	28918019	28918019	T	C	MA1577.1 TLX2	-4	direct	ttaaTtag	-4	direct	ttaaCtag	6.10352e-05	0.00189209	0.0322581	ENSSSCG00000007108	17:28917688-28918188	17	28917688	28918188	132.833	5.37003	13.652	24.5	13.652	62140	0.0416883	17	28980328	29082392	KIZ	0.0867457	0.733458	-0.190425	0.495902	0.163997	0.473252	0.441168	0.0412173
ML	SNV	GATK	17	28918019	28918019	T	C	MA0900.2 HOXA2	-4	revcomp	ctaAttaa	-4	revcomp	ctaGttaa	0.00012207	0.00305176	0.04	ENSSSCG00000007108	17:28917688-28918188	17	28917688	28918188	132.833	5.37003	13.652	24.5	13.652	62140	0.0416883	17	28980328	29082392	KIZ	0.0867457	0.733458	-0.190425	0.495902	0.163997	0.473252	0.441168	0.0412173
ML	SNV	GATK	17	28918019	28918019	T	C	MA0158.2 HOXA5	-4	direct	ttaaTtag	-4	direct	ttaaCtag	0.000213623	0.00654602	0.032634	ENSSSCG00000007108	17:28917688-28918188	17	28917688	28918188	132.833	5.37003	13.652	24.5	13.652	62140	0.0416883	17	28980328	29082392	KIZ	0.0867457	0.733458	-0.190425	0.495902	0.163997	0.473252	0.441168	0.0412173
ML	SNV	GATK	17	28918019	28918019	T	C	MA0902.2 HOXB2	-4	direct	ttaaTtag	-4	direct	ttaaCtag	0.000106812	0.00497436	0.0214724	ENSSSCG00000007108	17:28917688-28918188	17	28917688	28918188	132.833	5.37003	13.652	24.5	13.652	62140	0.0416883	17	28980328	29082392	KIZ	0.0867457	0.733458	-0.190425	0.495902	0.163997	0.473252	0.441168	0.0412173
ML	SNV	GATK	17	28918019	28918019	T	C	MA0708.2 MSX2	-4	revcomp	ctaAttaa	-4	revcomp	ctaGttaa	0.000198364	0.00440979	0.0449827	ENSSSCG00000007108	17:28917688-28918188	17	28917688	28918188	132.833	5.37003	13.652	24.5	13.652	62140	0.0416883	17	28980328	29082392	KIZ	0.0867457	0.733458	-0.190425	0.495902	0.163997	0.473252	0.441168	0.0412173
ML	SNV	GATK	17	28918019	28918019	T	C	MA0666.2 MSX1	-4	revcomp	ctaAttaa	-4	revcomp	ctaGttaa	0.000152588	0.00361633	0.0421941	ENSSSCG00000007108	17:28917688-28918188	17	28917688	28918188	132.833	5.37003	13.652	24.5	13.652	62140	0.0416883	17	28980328	29082392	KIZ	0.0867457	0.733458	-0.190425	0.495902	0.163997	0.473252	0.441168	0.0412173
ML	SNV	GATK	17	38869876	38869876	G	A	MA1950.1 FLI1::FOXI1	-3	direct	aaaGtcaggaaggc	-3	direct	aaaAtcaggaaggc	0.00114707	0.000156678	7.3212	ENSSSCG00000055187	17:38869712-38870212	17	38869712	38870212	82.3333	6.79191	3.52822	72.8671	3.52822	94678	0.050972	17	38956673	38964890	CPNE1	-0.0267466	0.883606	0.0533845	0.790298	0.246065	0.134294	0.165934	0.284472
ML	SNV	GATK	17	38869876	38869876	G	A	MA1952.1 FOXJ2::ELF1	-3	direct	aaaGtcaggaaggc	-3	direct	aaaAtcaggaaggc	0.000888936	0.000137318	6.47356	ENSSSCG00000055187	17:38869712-38870212	17	38869712	38870212	82.3333	6.79191	3.52822	72.8671	3.52822	94678	0.050972	17	38956673	38964890	CPNE1	-0.0267466	0.883606	0.0533845	0.790298	0.246065	0.134294	0.165934	0.284472
ML	SNV	GATK	17	38869876	38869876	G	A	MA1947.1 ETV5::FOXO1	-3	direct	aaaGtcaggaagg	-3	direct	aaaAtcaggaagg	0.0019424	0.00013949	13.925	ENSSSCG00000055187	17:38869712-38870212	17	38869712	38870212	82.3333	6.79191	3.52822	72.8671	3.52822	94678	0.050972	17	38956673	38964890	CPNE1	-0.0267466	0.883606	0.0533845	0.790298	0.246065	0.134294	0.165934	0.284472
ML	SNV	GATK	17	38869876	38869876	G	A	MA1955.1 FOXO1::ELK3	-3	direct	aaaGtcaggaaggc	-3	direct	aaaAtcaggaaggc	0.000817861	6.25104e-05	13.0836	ENSSSCG00000055187	17:38869712-38870212	17	38869712	38870212	82.3333	6.79191	3.52822	72.8671	3.52822	94678	0.050972	17	38956673	38964890	CPNE1	-0.0267466	0.883606	0.0533845	0.790298	0.246065	0.134294	0.165934	0.284472
ML	SNV	GATK	17	38869876	38869876	G	A	MA1956.1 FOXO1::FLI1	-3	direct	aaaGtcaggaaggc	-3	direct	aaaAtcaggaaggc	0.00178667	0.000180747	9.88491	ENSSSCG00000055187	17:38869712-38870212	17	38869712	38870212	82.3333	6.79191	3.52822	72.8671	3.52822	94678	0.050972	17	38956673	38964890	CPNE1	-0.0267466	0.883606	0.0533845	0.790298	0.246065	0.134294	0.165934	0.284472
ML	SNV	GATK	17	38869876	38869876	G	A	MA1953.1 FOXO1::ELF1	-3	direct	aaaGtcaggaaggc	-3	direct	aaaAtcaggaaggc	0.00101035	8.68775e-05	11.6296	ENSSSCG00000055187	17:38869712-38870212	17	38869712	38870212	82.3333	6.79191	3.52822	72.8671	3.52822	94678	0.050972	17	38956673	38964890	CPNE1	-0.0267466	0.883606	0.0533845	0.790298	0.246065	0.134294	0.165934	0.284472
ML	SNV	GATK	17	38869876	38869876	G	A	MA1954.1 FOXO1::ELK1	-3	direct	aaaGtcaggaaggc	-3	direct	aaaAtcaggaaggc	0.000693966	5.67399e-05	12.2306	ENSSSCG00000055187	17:38869712-38870212	17	38869712	38870212	82.3333	6.79191	3.52822	72.8671	3.52822	94678	0.050972	17	38956673	38964890	CPNE1	-0.0267466	0.883606	0.0533845	0.790298	0.246065	0.134294	0.165934	0.284472
ML	SNV	GATK	17	38869876	38869876	G	A	MA0029.1 Mecom	-11	direct	aaggaaagaaaGtc	-11	direct	aaggaaagaaaAtc	0.00172864	0.000332247	5.20288	ENSSSCG00000055187	17:38869712-38870212	17	38869712	38870212	82.3333	6.79191	3.52822	72.8671	3.52822	94678	0.050972	17	38956673	38964890	CPNE1	-0.0267466	0.883606	0.0533845	0.790298	0.246065	0.134294	0.165934	0.284472
ML	SNV	GATK	17	38869876	38869876	G	A	MA0149.1 EWSR1-FLI1	-8	direct	gaaagaaaGtcaggaagg	-8	direct	gaaagaaaAtcaggaagg	2.77325e-06	2.70417e-05	0.102554	ENSSSCG00000055187	17:38869712-38870212	17	38869712	38870212	82.3333	6.79191	3.52822	72.8671	3.52822	94678	0.050972	17	38956673	38964890	CPNE1	-0.0267466	0.883606	0.0533845	0.790298	0.246065	0.134294	0.165934	0.284472
ML	SNV	GATK	17	38869876	38869876	G	A	MA0676.1 Nr2e1	-4	direct	gaaaGtcag	-4	direct	gaaaAtcag	0.000213623	0.00331116	0.0645161	ENSSSCG00000055187	17:38869712-38870212	17	38869712	38870212	82.3333	6.79191	3.52822	72.8671	3.52822	94678	0.050972	17	38956673	38964890	CPNE1	-0.0267466	0.883606	0.0533845	0.790298	0.246065	0.134294	0.165934	0.284472
ML	SNV	GATK	17	38869876	38869876	G	A	MA0112.3 ESR1	-3	direct	aaaGtcaggaaggccct	-3	direct	aaaAtcaggaaggccct	0.000470633	0.00339752	0.138523	ENSSSCG00000055187	17:38869712-38870212	17	38869712	38870212	82.3333	6.79191	3.52822	72.8671	3.52822	94678	0.050972	17	38956673	38964890	CPNE1	-0.0267466	0.883606	0.0533845	0.790298	0.246065	0.134294	0.165934	0.284472
ML	SNV	GATK	17	38869876	38869876	G	A	MA0728.1 Nr2F6	-11	direct	aaggaaagaaaGtca	-11	direct	aaggaaagaaaAtca	0.000306369	0.00200675	0.152669	ENSSSCG00000055187	17:38869712-38870212	17	38869712	38870212	82.3333	6.79191	3.52822	72.8671	3.52822	94678	0.050972	17	38956673	38964890	CPNE1	-0.0267466	0.883606	0.0533845	0.790298	0.246065	0.134294	0.165934	0.284472
ML	SNV	GATK	17	38869876	38869876	G	A	MA0729.1 RARA	-11	direct	aaggaaagaaaGtcagga	-11	direct	aaggaaagaaaAtcagga	0.00037677	0.00192373	0.195854	ENSSSCG00000055187	17:38869712-38870212	17	38869712	38870212	82.3333	6.79191	3.52822	72.8671	3.52822	94678	0.050972	17	38956673	38964890	CPNE1	-0.0267466	0.883606	0.0533845	0.790298	0.246065	0.134294	0.165934	0.284472
ML	SNV	GATK	17	38869876	38869876	G	A	MA0857.1 Rarb	-12	direct	aaaggaaagaaaGtca	-12	direct	aaaggaaagaaaAtca	5.28076e-05	0.000330043	0.160002	ENSSSCG00000055187	17:38869712-38870212	17	38869712	38870212	82.3333	6.79191	3.52822	72.8671	3.52822	94678	0.050972	17	38956673	38964890	CPNE1	-0.0267466	0.883606	0.0533845	0.790298	0.246065	0.134294	0.165934	0.284472
ML	SNV	GATK	17	38869876	38869876	G	A	MA1418.1 IRF3	-16	direct	agagaaaggaaagaaaGtcag	-16	direct	agagaaaggaaagaaaAtcag	0.000789989	9.56449e-05	8.25961	ENSSSCG00000055187	17:38869712-38870212	17	38869712	38870212	82.3333	6.79191	3.52822	72.8671	3.52822	94678	0.050972	17	38956673	38964890	CPNE1	-0.0267466	0.883606	0.0533845	0.790298	0.246065	0.134294	0.165934	0.284472
ML	SNV	GATK	17	38869876	38869876	G	A	MA1508.1 IKZF1	-2	direct	aaGtcaggaagg	-2	direct	aaAtcaggaagg	0.000412643	4.23789e-05	9.73699	ENSSSCG00000055187	17:38869712-38870212	17	38869712	38870212	82.3333	6.79191	3.52822	72.8671	3.52822	94678	0.050972	17	38956673	38964890	CPNE1	-0.0267466	0.883606	0.0533845	0.790298	0.246065	0.134294	0.165934	0.284472
ML	SNV	GATK	17	38869876	38869876	G	A	MA1616.1 Prdm15	-6	direct	aagaaaGtcaggaag	-6	direct	aagaaaAtcaggaag	0.000418869	4.51542e-05	9.2764	ENSSSCG00000055187	17:38869712-38870212	17	38869712	38870212	82.3333	6.79191	3.52822	72.8671	3.52822	94678	0.050972	17	38956673	38964890	CPNE1	-0.0267466	0.883606	0.0533845	0.790298	0.246065	0.134294	0.165934	0.284472
ML	SNV	GATK	17	38869876	38869876	G	A	MA0598.3 EHF	-2	revcomp	gggccttcctgaCtt	-2	revcomp	gggccttcctgaTtt	0.000845411	0.000166187	5.0871	ENSSSCG00000055187	17:38869712-38870212	17	38869712	38870212	82.3333	6.79191	3.52822	72.8671	3.52822	94678	0.050972	17	38956673	38964890	CPNE1	-0.0267466	0.883606	0.0533845	0.790298	0.246065	0.134294	0.165934	0.284472
ML	SNV	GATK	17	38869876	38869876	G	A	MA0508.3 PRDM1	-8	revcomp	gaCtttctttc	-8	revcomp	gaTtttctttc	0.000382185	0.0045433	0.0841205	ENSSSCG00000055187	17:38869712-38870212	17	38869712	38870212	82.3333	6.79191	3.52822	72.8671	3.52822	94678	0.050972	17	38956673	38964890	CPNE1	-0.0267466	0.883606	0.0533845	0.790298	0.246065	0.134294	0.165934	0.284472
ML	SNV	GATK	17	38869876	38869876	G	A	MA1936.1 ERF::FOXO1	-3	direct	aaaGtcaggaaggc	-3	direct	aaaAtcaggaaggc	0.000240874	3.24696e-05	7.41843	ENSSSCG00000055187	17:38869712-38870212	17	38869712	38870212	82.3333	6.79191	3.52822	72.8671	3.52822	94678	0.050972	17	38956673	38964890	CPNE1	-0.0267466	0.883606	0.0533845	0.790298	0.246065	0.134294	0.165934	0.284472
ML	SNV	GATK	17	38869876	38869876	G	A	MA1946.1 ETV5::FOXI1	-3	direct	aaaGtcaggaagg	-3	direct	aaaAtcaggaagg	0.00208743	0.000188783	11.0573	ENSSSCG00000055187	17:38869712-38870212	17	38869712	38870212	82.3333	6.79191	3.52822	72.8671	3.52822	94678	0.050972	17	38956673	38964890	CPNE1	-0.0267466	0.883606	0.0533845	0.790298	0.246065	0.134294	0.165934	0.284472
ML	SNV	GATK	2	134554789	134554789	C	A	MA1566.2 TBX3	-9	direct	gaggtattaCa	-9	direct	gaggtattaAa	0.00239062	0.000397682	6.01139	ENSSSCG00000014274	2:134554345-134554845	2	134554345	134554845	87.1667	38.7189	17.5677	100	17.5677	821	0.160437	2	134555666	134570348	PDLIM4	-0.492674	0.33506	-0.539031	0.336901	0.0215056	0.962675	0.0678626	0.875674
ML	SNV	GATK	2	134554789	134554789	C	A	MA0802.1 TBR1	-8	direct	aggtattaCa	-8	direct	aggtattaAa	0.00190449	0.0002985	6.38019	ENSSSCG00000014274	2:134554345-134554845	2	134554345	134554845	87.1667	38.7189	17.5677	100	17.5677	821	0.160437	2	134555666	134570348	PDLIM4	-0.492674	0.33506	-0.539031	0.336901	0.0215056	0.962675	0.0678626	0.875674
ML	SNV	GATK	2	134554789	134554789	C	A	MA1960.1 MGA::EVX1	-8	direct	aggtattaCaga	-8	direct	aggtattaAaga	0.00299203	0.000300646	9.95202	ENSSSCG00000014274	2:134554345-134554845	2	134554345	134554845	87.1667	38.7189	17.5677	100	17.5677	821	0.160437	2	134555666	134570348	PDLIM4	-0.492674	0.33506	-0.539031	0.336901	0.0215056	0.962675	0.0678626	0.875674
ML	SNV	GATK	2	134554789	134554789	C	A	MA0019.1 Ddit3::Cebpa	-7	revcomp	atctGtaatacc	-7	revcomp	atctTtaatacc	0.000317216	0.00473601	0.0669796	ENSSSCG00000014274	2:134554345-134554845	2	134554345	134554845	87.1667	38.7189	17.5677	100	17.5677	821	0.160437	2	134555666	134570348	PDLIM4	-0.492674	0.33506	-0.539031	0.336901	0.0215056	0.962675	0.0678626	0.875674
ML	SNV	GATK	2	134554789	134554789	C	A	MA1573.2 Thap11	-4	direct	attaCagatcccac	-4	direct	attaAagatcccac	2.38903e-05	0.000331439	0.0720805	ENSSSCG00000014274	2:134554345-134554845	2	134554345	134554845	87.1667	38.7189	17.5677	100	17.5677	821	0.160437	2	134555666	134570348	PDLIM4	-0.492674	0.33506	-0.539031	0.336901	0.0215056	0.962675	0.0678626	0.875674
ML	SNV	GATK	2	134554789	134554789	C	A	MA0151.1 Arid3a	-4	direct	attaCa	-4	direct	attaAa	0.00512695	0.000244141	21	ENSSSCG00000014274	2:134554345-134554845	2	134554345	134554845	87.1667	38.7189	17.5677	100	17.5677	821	0.160437	2	134555666	134570348	PDLIM4	-0.492674	0.33506	-0.539031	0.336901	0.0215056	0.962675	0.0678626	0.875674
ML	SNV	GATK	4	16378762	16378762	A	G	MA0035.4 GATA1	-4	direct	atcaAatctat	-4	direct	atcaGatctat	0.000198364	0.00191283	0.103702	ENSSSCG00000021586	4:16378334-16378834	4	16378334	16378834	75	7.94694	8.73058	47.0735	8.73058	120678	0.0503012	4	16374902	16553002	ZHX2	0.0459785	0.900636	0.27788	0.49219	0.188749	0.568745	-0.0431524	0.890151
ML	SNV	GATK	4	16378762	16378762	A	G	MA1636.1 CEBPG	-9	direct	aggtgatcaAatcta	-9	direct	aggtgatcaGatcta	0.000423854	0.00461236	0.0918954	ENSSSCG00000021586	4:16378334-16378834	4	16378334	16378834	75	7.94694	8.73058	47.0735	8.73058	120678	0.0503012	4	16374902	16553002	ZHX2	0.0459785	0.900636	0.27788	0.49219	0.188749	0.568745	-0.0431524	0.890151
ML	SNV	GATK	4	16378762	16378762	A	G	MA0729.1 RARA	-10	direct	gaggtgatcaAatctata	-10	direct	gaggtgatcaGatctata	0.000860727	0.000116081	7.41487	ENSSSCG00000021586	4:16378334-16378834	4	16378334	16378834	75	7.94694	8.73058	47.0735	8.73058	120678	0.0503012	4	16374902	16553002	ZHX2	0.0459785	0.900636	0.27788	0.49219	0.188749	0.568745	-0.0431524	0.890151
ML	SNV	GATK	4	16378762	16378762	A	G	MA0151.1 Arid3a	-4	direct	atcaAa	-4	direct	atcaGa	0.000488281	0.0090332	0.0540541	ENSSSCG00000021586	4:16378334-16378834	4	16378334	16378834	75	7.94694	8.73058	47.0735	8.73058	120678	0.0503012	4	16374902	16553002	ZHX2	0.0459785	0.900636	0.27788	0.49219	0.188749	0.568745	-0.0431524	0.890151
ML	SNV	GATK	4	16378762	16378762	A	G	MA0728.1 Nr2F6	-10	direct	gaggtgatcaAatct	-10	direct	gaggtgatcaGatct	0.0031122	0.000474469	6.55934	ENSSSCG00000021586	4:16378334-16378834	4	16378334	16378834	75	7.94694	8.73058	47.0735	8.73058	120678	0.0503012	4	16374902	16553002	ZHX2	0.0459785	0.900636	0.27788	0.49219	0.188749	0.568745	-0.0431524	0.890151
ML	SNV	GATK	5	60843332	60843332	G	C	MA0688.1 TBX2	-7	revcomp	cagCagtgaaa	-7	revcomp	cagGagtgaaa	0.00301003	0.000137329	21.9184	ENSSSCG00000024152	5:60843105-60843605	5	60843105	60843605	69	5.9491	8.00917	30.9757	8.00917	66356	0.0216193	5	60523433	60776750	ETV6	-0.189525	0.472572	0.278117	0.337581	0.036449	0.878096	-0.431193	0.0543068
ML	SNV	GATK	5	60843332	60843332	G	C	MA1930.1 CTCF	-2	direct	ctGctgttatctggtgctgccacctgctnnnnnnn	-2	direct	ctCctgttatctggtgctgccacctgctnnnnnnn	0.000189497	0.00156019	0.121458	ENSSSCG00000024152	5:60843105-60843605	5	60843105	60843605	69	5.9491	8.00917	30.9757	8.00917	66356	0.0216193	5	60523433	60776750	ETV6	-0.189525	0.472572	0.278117	0.337581	0.036449	0.878096	-0.431193	0.0543068
ML	SNV	GATK	5	60843332	60843332	G	C	MA1566.2 TBX3	-7	revcomp	cagCagtgaaa	-7	revcomp	cagGagtgaaa	0.00128555	7.4625e-05	17.2268	ENSSSCG00000024152	5:60843105-60843605	5	60843105	60843605	69	5.9491	8.00917	30.9757	8.00917	66356	0.0216193	5	60523433	60776750	ETV6	-0.189525	0.472572	0.278117	0.337581	0.036449	0.878096	-0.431193	0.0543068
ML	SNV	GATK	5	60843332	60843332	G	C	MA0800.1 EOMES	-9	revcomp	cagCagtgaaaac	-9	revcomp	cagGagtgaaaac	0.00107476	5.20051e-05	20.6665	ENSSSCG00000024152	5:60843105-60843605	5	60843105	60843605	69	5.9491	8.00917	30.9757	8.00917	66356	0.0216193	5	60523433	60776750	ETV6	-0.189525	0.472572	0.278117	0.337581	0.036449	0.878096	-0.431193	0.0543068
ML	SNV	GATK	5	60843332	60843332	G	C	MA1472.2 Bhlha15	-5	direct	tcactGctgtta	-5	direct	tcactCctgtta	0.000248015	0.003187	0.0778208	ENSSSCG00000024152	5:60843105-60843605	5	60843105	60843605	69	5.9491	8.00917	30.9757	8.00917	66356	0.0216193	5	60523433	60776750	ETV6	-0.189525	0.472572	0.278117	0.337581	0.036449	0.878096	-0.431193	0.0543068
ML	SNV	GATK	5	60843332	60843332	G	C	MA0521.2 Tcf12	-5	direct	tcactGctgtta	-5	direct	tcactCctgtta	0.000447273	0.00588036	0.0760623	ENSSSCG00000024152	5:60843105-60843605	5	60843105	60843605	69	5.9491	8.00917	30.9757	8.00917	66356	0.0216193	5	60523433	60776750	ETV6	-0.189525	0.472572	0.278117	0.337581	0.036449	0.878096	-0.431193	0.0543068
ML	SNV	GATK	5	60843332	60843332	G	C	MA0690.2 TBX21	-7	direct	tttcactGctg	-7	direct	tttcactCctg	0.00139284	7.93934e-05	17.5435	ENSSSCG00000024152	5:60843105-60843605	5	60843105	60843605	69	5.9491	8.00917	30.9757	8.00917	66356	0.0216193	5	60523433	60776750	ETV6	-0.189525	0.472572	0.278117	0.337581	0.036449	0.878096	-0.431193	0.0543068
ML	SNV	GATK	5	60843332	60843332	G	C	MA1621.1 Rbpjl	-6	revcomp	ataacagCagtgaa	-6	direct	ttcactCctgttat	0.00387796	0.000433564	8.94438	ENSSSCG00000024152	5:60843105-60843605	5	60843105	60843605	69	5.9491	8.00917	30.9757	8.00917	66356	0.0216193	5	60523433	60776750	ETV6	-0.189525	0.472572	0.278117	0.337581	0.036449	0.878096	-0.431193	0.0543068
ML	SNV	GATK	5	60843332	60843332	G	C	MA1567.2 Tbx6	-8	revcomp	cagCagtgaaaa	-8	revcomp	cagGagtgaaaa	0.00154698	0.000102699	15.0633	ENSSSCG00000024152	5:60843105-60843605	5	60843105	60843605	69	5.9491	8.00917	30.9757	8.00917	66356	0.0216193	5	60523433	60776750	ETV6	-0.189525	0.472572	0.278117	0.337581	0.036449	0.878096	-0.431193	0.0543068
ML	SNV	GATK	5	60843332	60843332	G	C	MA1947.1 ETV5::FOXO1	-4	revcomp	gataacagCagtg	-4	revcomp	gataacagGagtg	0.00437553	0.000279814	15.6373	ENSSSCG00000024152	5:60843105-60843605	5	60843105	60843605	69	5.9491	8.00917	30.9757	8.00917	66356	0.0216193	5	60523433	60776750	ETV6	-0.189525	0.472572	0.278117	0.337581	0.036449	0.878096	-0.431193	0.0543068
ML	SNV	GATK	5	60843332	60843332	G	C	MA0807.1 TBX5	-5	revcomp	agCagtga	-5	revcomp	agGagtga	0.00782776	0.000335693	23.3182	ENSSSCG00000024152	5:60843105-60843605	5	60843105	60843605	69	5.9491	8.00917	30.9757	8.00917	66356	0.0216193	5	60523433	60776750	ETV6	-0.189525	0.472572	0.278117	0.337581	0.036449	0.878096	-0.431193	0.0543068
ML	SNV	GATK	5	60843332	60843332	G	C	MA1593.1 ZNF317	-5	revcomp	taacagCagtga	-5	revcomp	taacagGagtga	0.000104904	0.00155568	0.067433	ENSSSCG00000024152	5:60843105-60843605	5	60843105	60843605	69	5.9491	8.00917	30.9757	8.00917	66356	0.0216193	5	60523433	60776750	ETV6	-0.189525	0.472572	0.278117	0.337581	0.036449	0.878096	-0.431193	0.0543068
ML	SNV	GATK	5	60843332	60843332	G	C	MA1565.1 TBX18	-7	revcomp	acagCagtgaaa	-7	revcomp	acagGagtgaaa	0.00215286	0.000101328	21.2465	ENSSSCG00000024152	5:60843105-60843605	5	60843105	60843605	69	5.9491	8.00917	30.9757	8.00917	66356	0.0216193	5	60523433	60776750	ETV6	-0.189525	0.472572	0.278117	0.337581	0.036449	0.878096	-0.431193	0.0543068
ML	SNV	GATK	5	60843332	60843332	G	C	MA0665.1 MSC	-4	direct	cactGctgtt	-4	direct	cactCctgtt	0.000277519	0.00141144	0.196622	ENSSSCG00000024152	5:60843105-60843605	5	60843105	60843605	69	5.9491	8.00917	30.9757	8.00917	66356	0.0216193	5	60523433	60776750	ETV6	-0.189525	0.472572	0.278117	0.337581	0.036449	0.878096	-0.431193	0.0543068
ML	SNV	GATK	5	60843332	60843332	G	C	MA0806.1 TBX4	-5	revcomp	agCagtga	-5	revcomp	agGagtga	0.00608826	0.000320435	19	ENSSSCG00000024152	5:60843105-60843605	5	60843105	60843605	69	5.9491	8.00917	30.9757	8.00917	66356	0.0216193	5	60523433	60776750	ETV6	-0.189525	0.472572	0.278117	0.337581	0.036449	0.878096	-0.431193	0.0543068
ML	SNV	GATK	5	60843332	60843332	G	C	MA0801.1 MGA	-5	revcomp	agCagtga	-5	revcomp	agGagtga	0.00396729	0.000259399	15.2941	ENSSSCG00000024152	5:60843105-60843605	5	60843105	60843605	69	5.9491	8.00917	30.9757	8.00917	66356	0.0216193	5	60523433	60776750	ETV6	-0.189525	0.472572	0.278117	0.337581	0.036449	0.878096	-0.431193	0.0543068
ML	SNV	GATK	5	60843332	60843332	G	C	MA0832.1 Tcf21	-6	revcomp	ataacagCagtgaa	-6	revcomp	ataacagGagtgaa	0.000203226	0.0020498	0.099144	ENSSSCG00000024152	5:60843105-60843605	5	60843105	60843605	69	5.9491	8.00917	30.9757	8.00917	66356	0.0216193	5	60523433	60776750	ETV6	-0.189525	0.472572	0.278117	0.337581	0.036449	0.878096	-0.431193	0.0543068
ML	SNV	GATK	5	60843332	60843332	G	C	MA1508.1 IKZF1	-4	revcomp	ataacagCagtg	-4	revcomp	ataacagGagtg	0.00539058	0.000463426	11.632	ENSSSCG00000024152	5:60843105-60843605	5	60843105	60843605	69	5.9491	8.00917	30.9757	8.00917	66356	0.0216193	5	60523433	60776750	ETV6	-0.189525	0.472572	0.278117	0.337581	0.036449	0.878096	-0.431193	0.0543068
ML	SNV	GATK	5	60843332	60843332	G	C	MA0802.1 TBR1	-7	revcomp	agCagtgaaa	-7	revcomp	agGagtgaaa	0.000770569	3.71933e-05	20.7179	ENSSSCG00000024152	5:60843105-60843605	5	60843105	60843605	69	5.9491	8.00917	30.9757	8.00917	66356	0.0216193	5	60523433	60776750	ETV6	-0.189525	0.472572	0.278117	0.337581	0.036449	0.878096	-0.431193	0.0543068
ML	SNV	GATK	5	60843332	60843332	G	C	MA0805.1 TBX1	-5	revcomp	agCagtga	-5	revcomp	agGagtga	0.00405884	0.000289917	14	ENSSSCG00000024152	5:60843105-60843605	5	60843105	60843605	69	5.9491	8.00917	30.9757	8.00917	66356	0.0216193	5	60523433	60776750	ETV6	-0.189525	0.472572	0.278117	0.337581	0.036449	0.878096	-0.431193	0.0543068
ML	SNV	GATK	5	60843332	60843332	G	C	MA0803.1 TBX15	-5	revcomp	agCagtga	-5	revcomp	agGagtga	0.00411987	0.000289917	14.2105	ENSSSCG00000024152	5:60843105-60843605	5	60843105	60843605	69	5.9491	8.00917	30.9757	8.00917	66356	0.0216193	5	60523433	60776750	ETV6	-0.189525	0.472572	0.278117	0.337581	0.036449	0.878096	-0.431193	0.0543068

## Sheet: SV-GWAS-overlap
Minipig breed in which variant was found in a ROHR and homozygous mutant	Type	Caller	Var_chr	Var_start	Var_end	Size of SV	Ensembl.ID	Gene.chr	Gene.start.(bp)	Gene.end.(bp)	Gene.name
AM	INS	Manta	1	58010771	58010780	10	ENSSSCG00000004332	1	57899808	58281430	BACH2
AM	DEL	Manta	1	64413537	64414107	571	ENSSSCG0000000434	1	64306073	64459904	MMS22L
AM	DEL	Smoove	1	64413553	64414107	555	ENSSSCG0000000434	1	64306073	64459904	MMS22L
AM	INS	Manta	1	242802123	242802125	3	ENSSSCG00000005393	1	242682812	242970615	PLPPR1
AM	INS	Manta	9	113986304	113986308	5	ENSSSCG00025042033	9	113973325	114067553	PRRC2C
AM	INS	Manta	14	24064832	24064836	5	ENSSSCG00000009745	14	24059019	24241176	ADGRD1
AM	INS	Manta	14	65468034	65468059	26	ENSSSCG00000010219	14	65408598	65598485	ARID5B
AM	DEL	Manta	18	46238782	46238973	192	ENSSSCG00105001793	18	46217517	46250256	NFE2L3
ML	DEL	Smoove	3	90296349	90296642	294	ENSSSCG00085028295	3	89803519	90382034	NRXN1
ML	DEL	Smoove	15	8537406	8537408	3	ENSSSCG00105001240	15	8192607	8811795	ARHGAP15
ML	INS	Manta	15	8566289	8566333	45	ENSSSCG00105001240	15	8192607	8811795	ARHGAP15
