# Supplementary material for: Integrative multi-omics analysis of growth plate regulation underlying body size in miniature pigs
Source: Research Square preprint supplement (doi:10.21203/rs.3.rs-7865536/v1), 2025-12-01
Supplement: Supplementary file 3 [file 212e12584608104438e22311.xlsx]

## Sheet: AM
Supplementary Data 3. Runs of homozygozity regions and variants called for miniature pigs of interest. Chromosome, start-end position and length of the ROHR are provided for Aachen minipig (AM), Mini-LEWE (ML) and the combined dataset of both of them (AM+ML) as well as the number of homozygous mutant variants in each breed within ROHR are provided.
Chromosome	Start	End	Length(bp)
1	183191	200349	17159
1	215257	219775	4519
1	227418	237623	10206
1	243636	245927	2292
1	258679	266942	8264
1	273070	282062	8993
1	285438	291092	5655
1	294530	302707	8178
1	308180	327204	19025
1	403816	405023	1208
1	480686	484489	3804
1	608509	610061	1553
1	611022	612510	1489
1	636752	638703	1952
1	792393	793834	1442
1	872190	873398	1209
1	1230141	1231036	896
1	1231226	1232564	1339
1	1283378	1284596	1219
1	1284633	1286297	1665
1	1314357	1321435	7079
1	1321485	1327228	5744
1	1327363	1417740	90378
1	1430936	1432066	1131
1	1482778	1483885	1108
1	1485342	1486998	1657
1	1503174	1504259	1086
1	1701991	1704634	2644
1	1721109	1723038	1930
1	1727461	1728891	1431
1	1729851	1731467	1617
1	1733634	1735404	1771
1	1737946	1739147	1202
1	1755419	1756888	1470
1	1780383	1781896	1514
1	1817314	1818679	1366
1	1851200	1852933	1734
1	1855773	1855953	181
1	1856015	1857159	1145
1	1857844	1859558	1715
1	1860398	1862551	2154
1	1915219	1916583	1365
1	1966232	1967784	1553
1	1969003	1970908	1906
1	1977013	1979655	2643
1	1980667	1983473	2807
1	1984325	1985677	1353
1	2007036	2009242	2207
1	2014674	2015993	1320
1	2025363	2026813	1451
1	2036349	2037804	1456
1	2045448	2046754	1307
1	2055704	2058650	2947
1	2059538	2060945	1408
1	2099334	2100992	1659
1	2106434	2108315	1882
1	2119820	2131473	11654
1	2131600	2132893	1294
1	2132970	2134296	1327
1	2134981	2139210	4230
1	2156001	2158478	2478
1	2182554	2183926	1373
1	2192741	2194145	1405
1	2206191	2207595	1405
1	2211740	2213113	1374
1	2225225	2226552	1328
1	2232013	2233340	1328
1	2238601	2240076	1476
1	2245225	2246478	1254
1	2338025	2339313	1289
1	2406664	2408475	1812
1	2446742	2447675	934
1	2468025	2469856	1832
1	2473642	2474807	1166
1	2570936	2572459	1524
1	2584085	2596758	12674
1	2598207	2598603	397
1	2606046	2607730	1685
1	2616567	2617669	1103
1	2619850	2621104	1255
1	2758168	2758894	727
1	2836822	2838192	1371
1	2847546	2847841	296
1	2891808	2893023	1216
1	2894035	2895272	1238
1	2953598	2960732	7135
1	3098793	3105922	7130
1	3239119	3240736	1618
1	3291619	3295594	3976
1	3310618	3321253	10636
1	3359636	3361328	1693
1	3378344	3379692	1349
1	3443881	3445454	1574
1	3453450	3462597	9148
1	3463089	3467299	4211
1	3472716	3474234	1519
1	3474283	3476757	2475
1	3510742	3512191	1450
1	3552418	3554861	2444
1	3559032	3560299	1268
1	3597354	3628540	31187
1	3643259	3644749	1491
1	3647703	3650782	3080
1	3670494	3672499	2006
1	3745362	3746788	1427
1	3801936	3803492	1557
1	3807559	3808885	1327
1	3836371	3837688	1318
1	3937282	3938876	1595
1	3998264	4000489	2226
1	4008545	4010109	1565
1	4046431	4048246	1816
1	4061926	4062067	142
1	4068992	4070536	1545
1	4086272	4087890	1619
1	4089061	4092025	2965
1	4095073	4095721	649
1	4109126	4110448	1323
1	4122542	4124937	2396
1	4129362	4131008	1647
1	4204118	4206179	2062
1	4207186	4210752	3567
1	4257886	4259925	2040
1	4355104	4356512	1409
1	4377571	4385508	7938
1	4421172	4422986	1815
1	4470024	4471457	1434
1	4508475	4510274	1800
1	4510444	4513095	2652
1	4574371	4575997	1627
1	4606464	4612995	6532
1	4644390	4645386	997
1	4690423	4692014	1592
1	4909159	4912869	3711
1	4917322	4919153	1832
1	4964131	4965639	1509
1	4971349	4973659	2311
1	4981699	4983538	1840
1	4984860	4985959	1100
1	4986590	4987428	839
1	4987514	4994086	6573
1	4997365	5001451	4087
1	5012210	5015161	2952
1	5029041	5030357	1317
1	5118126	5119395	1270
1	5165342	5166154	813
1	5174022	5174858	837
1	5224438	5227514	3077
1	5228999	5230961	1963
1	5237756	5239314	1559
1	5357911	5359539	1629
1	5371213	5374606	3394
1	5382762	5387971	5210
1	5420415	5422715	2301
1	5423831	5426722	2892
1	5427230	5429152	1923
1	5429176	5433823	4648
1	5462509	5464136	1628
1	5475357	5476900	1544
1	5483050	5484283	1234
1	5485624	5487265	1642
1	5492382	5496084	3703
1	5510478	5511850	1373
1	5520551	5524249	3699
1	5541189	5542636	1448
1	5548099	5549340	1242
1	5554904	5557743	2840
1	5564185	5568830	4646
1	5569602	5571122	1521
1	5578782	5581112	2331
1	5585805	5588042	2238
1	5590643	5593305	2663
1	5608185	5610962	2778
1	5612747	5615000	2254
1	5615650	5623234	7585
1	5625647	5627881	2235
1	5633418	5634674	1257
1	5634687	5634992	306
1	5662165	5666034	3870
1	5683106	5685024	1919
1	5690756	5692000	1245
1	5711591	5713186	1596
1	5721266	5721420	155
1	5722251	5723566	1316
1	5724006	5725256	1251
1	5726625	5727974	1350
1	5732962	5734786	1825
1	5735251	5736864	1614
1	5737193	5739287	2095
1	5741981	5743415	1435
1	5743774	5746049	2276
1	5778037	5779889	1853
1	5809279	5809664	386
1	5898516	5900826	2311
1	5937919	5938864	946
1	5963995	5966446	2452
1	5973663	5974914	1252
1	5974938	5976577	1640
1	5989055	5990641	1587
1	5991364	5993543	2180
1	6005574	6009694	4121
1	6023648	6028624	4977
1	6028653	6029912	1260
1	6030499	6030547	49
1	6131090	6131732	643
1	6148799	6154936	6138
1	6249212	6249389	178
1	6249604	6251015	1412
1	6296426	6297194	769
1	6305692	6306201	510
1	6307371	6309538	2168
1	6313833	6315164	1332
1	6323943	6326494	2552
1	6344803	6345371	569
1	6346868	6347873	1006
1	6356033	6357383	1351
1	6399660	6400388	729
1	6406865	6406892	28
1	6409053	6409224	172
1	6415319	6416686	1368
1	6425868	6427715	1848
1	6499632	6503325	3694
1	6512443	6515614	3172
1	6515749	6517857	2109
1	6539130	6540721	1592
1	6542793	6544708	1916
1	6545915	6548025	2111
1	6548765	6550001	1237
1	6553346	6554958	1613
1	6601050	6602982	1933
1	6633845	6635292	1448
1	6653043	6655327	2285
1	6658927	6660681	1755
1	6702921	6704295	1375
1	6711893	6714816	2924
1	6718651	6722242	3592
1	6722967	6724437	1471
1	6737715	6739221	1507
1	6744687	6746609	1923
1	6749385	6750075	691
1	6751166	6752500	1335
1	6754115	6755765	1651
1	6758256	6760971	2716
1	6828430	6829529	1100
1	6833160	6835105	1946
1	6857293	6859170	1878
1	6862882	6864094	1213
1	6881110	6882886	1777
1	6905597	6906934	1338
1	6915340	6916064	725
1	6940716	6941986	1271
1	6942232	6943603	1372
1	6944739	6945458	720
1	7019905	7026817	6913
1	7027672	7030997	3326
1	7033208	7035412	2205
1	7072318	7074063	1746
1	7078078	7079183	1106
1	7186478	7188035	1558
1	7207844	7220708	12865
1	7220735	7223241	2507
1	7264182	7265851	1670
1	7294995	7298382	3388
1	7303032	7303379	348
1	7310716	7311972	1257
1	7336019	7337096	1078
1	7374646	7376124	1479
1	7398237	7399467	1231
1	7405689	7407256	1568
1	7422550	7424542	1993
1	7425155	7425251	97
1	7463045	7465139	2095
1	7466263	7467588	1326
1	7477639	7481435	3797
1	7486223	7487447	1225
1	7491465	7492471	1007
1	7517449	7518657	1209
1	7564405	7565129	725
1	7574364	7575798	1435
1	7577937	7580628	2692
1	7631600	7633515	1916
1	7644114	7645540	1427
1	7646398	7648506	2109
1	7674458	7677173	2716
1	7679135	7682153	3019
1	7694853	7696041	1189
1	7700993	7702742	1750
1	7702886	7706578	3693
1	7718024	7718390	367
1	7718516	7719967	1452
1	7795686	7797280	1595
1	7804324	7807366	3043
1	7817259	7819587	2329
1	7840478	7843421	2944
1	7920742	7921136	395
1	7926588	7928548	1961
1	7932816	7933509	694
1	7947674	7948942	1269
1	7957165	7962898	5734
1	7963350	7966337	2988
1	7994449	7995896	1448
1	8002048	8002685	638
1	8003654	8005134	1481
1	8010631	8010636	6
1	8024430	8024798	369
1	8043122	8044628	1507
1	8049501	8053120	3620
1	8066359	8067898	1540
1	8116251	8117862	1612
1	8123795	8125893	2099
1	8125958	8126937	980
1	8138154	8139713	1560
1	8145122	8147023	1902
1	8164806	8165666	861
1	8193918	8195328	1411
1	8196931	8199008	2078
1	8211086	8253022	41937
1	8268948	8270452	1505
1	8303164	8303753	590
1	8317991	8319641	1651
1	8407115	8408450	1336
1	8409921	8411644	1724
1	8512295	8512589	295
1	8516386	8518081	1696
1	8518527	8519808	1282
1	8520959	8522240	1282
1	8525561	8529747	4187
1	8900172	8901662	1491
1	8919808	8921529	1722
1	8996917	8998308	1392
1	9071512	9073268	1757
1	9091321	9092608	1288
1	9329462	9330729	1268
1	9336498	9337738	1241
1	9346299	9347525	1227
1	9355056	9356568	1513
1	9360785	9362225	1441
1	9370298	9370764	467
1	9387868	9388677	810
1	9479643	9480801	1159
1	9481455	9483482	2028
1	9516191	9517464	1274
1	9612930	9613631	702
1	9622545	9628483	5939
1	9637506	9639328	1823
1	9658476	9660154	1679
1	9661242	9696536	35295
1	9730179	9731388	1210
1	9761999	9763216	1218
1	9764107	9765492	1386
1	9771105	9772445	1341
1	9774716	9778123	3408
1	9791532	9794525	2994
1	9819156	9820364	1209
1	9820388	9821646	1259
1	9830397	9833444	3048
1	9889085	9891306	2222
1	9892511	9893849	1339
1	9894322	9895610	1289
1	9897473	9898739	1267
1	9899633	9901164	1532
1	10012318	10013759	1442
1	10049410	10050645	1236
1	10055724	10057086	1363
1	10057426	10060020	2595
1	10116143	10117689	1547
1	10134180	10137220	3041
1	10233462	10235032	1571
1	10292212	10293104	893
1	10362538	10363890	1353
1	10365010	10366673	1664
1	10400419	10401739	1321
1	10585964	10587551	1588
1	10638684	10640112	1429
1	10644916	10646638	1723
1	10673233	10674446	1214
1	10700789	10702917	2129
1	10716783	10718015	1233
1	10737063	10739763	2701
1	10774157	10775411	1255
1	10783191	10784574	1384
1	10822019	10823435	1417
1	10841716	10843665	1950
1	11101625	11102975	1351
1	11321822	11324639	2818
1	11409533	11411240	1708
1	11507133	11509159	2027
1	11531546	11532951	1406
1	11564236	11565110	875
1	11586007	11587927	1921
1	11611917	11613874	1958
1	11617288	11619114	1827
1	11620701	11620821	121
1	11623366	11624324	959
1	11624364	11625567	1204
1	11625747	11628284	2538
1	11629491	11632758	3268
1	11660050	11661493	1444
1	11665810	11667043	1234
1	11699623	11707028	7406
1	11711433	11713409	1977
1	11717063	11722817	5755
1	11726215	11727589	1375
1	11727697	11730261	2565
1	11735910	11738644	2735
1	11744576	11746238	1663
1	11746259	11747497	1239
1	11750651	11752097	1447
1	11753036	11759135	6100
1	11767995	11771078	3084
1	11780613	11784960	4348
1	11791053	11792375	1323
1	11792434	11793667	1234
1	11833279	11836732	3454
1	11842824	11846606	3783
1	11847805	11850153	2349
1	11851833	11855768	3936
1	11859981	11864336	4356
1	11878160	11879956	1797
1	11915463	11917248	1786
1	11921901	11922097	197
1	11935940	11937535	1596
1	11937718	11939068	1351
1	11946187	11947390	1204
1	11947575	11949107	1533
1	11964342	11964694	353
1	11991350	11992777	1428
1	11996119	11997558	1440
1	12061488	12064192	2705
1	12150863	12153055	2193
1	12174829	12176164	1336
1	12182218	12183742	1525
1	12183985	12185586	1602
1	12198174	12199499	1326
1	12205684	12207561	1878
1	12241375	12242884	1510
1	12252333	12255010	2678
1	12270960	12272625	1666
1	12300603	12313880	13278
1	12324683	12332322	7640
1	12342623	12344157	1535
1	12355679	12357721	2043
1	12366620	12371090	4471
1	12392130	12393113	984
1	12416956	12418364	1409
1	12428453	12428927	475
1	12446298	12447677	1380
1	12460039	12462251	2213
1	12464452	12466386	1935
1	12466844	12467506	663
1	12472922	12473367	446
1	12478558	12479699	1142
1	12523347	12530039	6693
1	12535856	12539982	4127
1	12541723	12543204	1482
1	12560456	12561245	790
1	12561325	12562800	1476
1	12571879	12574297	2419
1	12578437	12579669	1233
1	12591726	12592044	319
1	12602325	12604295	1971
1	12604515	12635156	30642
1	12641184	12641671	488
1	12647650	12649837	2188
1	12661280	12662546	1267
1	12666699	12667650	952
1	12695175	12698962	3788
1	12701525	12701709	185
1	12703969	12705283	1315
1	12727371	12729083	1713
1	12731355	12731803	449
1	12761163	12763059	1897
1	12837593	12842295	4703
1	12859229	12860696	1468
1	12901489	12909632	8144
1	12955811	12957863	2053
1	12966652	12968286	1635
1	12968441	12969644	1204
1	12982832	12984073	1242
1	12994925	12997150	2226
1	12998394	13031895	33502
1	13037047	13038642	1596
1	13053803	13055300	1498
1	13060761	13062657	1897
1	13079854	13085594	5741
1	13099412	13099865	454
1	13122351	13123482	1132
1	13130950	13132528	1579
1	13145291	13147572	2282
1	13228585	13229335	751
1	13304000	13310749	6750
1	13311505	13313685	2181
1	13321233	13325039	3807
1	13333690	13335330	1641
1	13361123	13362623	1501
1	13367297	13369130	1834
1	13370771	13372567	1797
1	13385389	13386209	821
1	13408233	13408351	119
1	13555045	13557985	2941
1	13583185	13584443	1259
1	13585241	13586707	1467
1	13589506	13590779	1274
1	13592339	13594674	2336
1	13596801	13598222	1422
1	13602777	13603335	559
1	13604923	13607093	2171
1	13608842	13610620	1779
1	13612385	13613931	1547
1	13614009	13615188	1180
1	13634958	13636256	1299
1	13654739	13656595	1857
1	13687075	13688248	1174
1	13691206	13692889	1684
1	13700886	13702422	1537
1	13731473	13732672	1200
1	13738323	13739575	1253
1	13739663	13741262	1600
1	13749723	13749938	216
1	13756405	13758229	1825
1	13759332	13760681	1350
1	13802079	13803397	1319
1	13839724	13840267	544
1	13869625	13872097	2473
1	13893836	13894955	1120
1	13895082	13895524	443
1	13921177	13922128	952
1	13995120	13995413	294
1	14005719	14008405	2687
1	14011544	14012779	1236
1	14019433	14020977	1545
1	14052689	14056623	3935
1	14059728	14061116	1389
1	14095751	14097247	1497
1	14100297	14103593	3297
1	14104171	14104466	296
1	14137633	14139710	2078
1	14142025	14146043	4019
1	14172984	14205638	32655
1	14205926	14209319	3394
1	14215700	14242469	26770
1	14245794	14247065	1272
1	14252621	14254706	2086
1	14255515	14257970	2456
1	14271890	14273034	1145
1	14313237	14314822	1586
1	14318596	14321125	2530
1	14322578	14324255	1678
1	14329228	14331996	2769
1	14332207	14334796	2590
1	14335751	14337906	2156
1	14339754	14341297	1544
1	14341565	14348240	6676
1	14360186	14361512	1327
1	14380977	14383935	2959
1	14384151	14384423	273
1	14384806	14387442	2637
1	14394079	14395456	1378
1	14401067	14403012	1946
1	14412448	14420657	8210
1	14421021	14474021	53001
1	14533720	14541388	7669
1	14607460	14609539	2080
1	14635387	14636186	800
1	14654111	14655739	1629
1	14659203	14661116	1914
1	14670806	14673770	2965
1	14695787	14697375	1589
1	14706266	14707756	1491
1	14744611	14747666	3056
1	14751148	14753108	1961
1	14758917	14760756	1840
1	14765124	14765746	623
1	14767252	14768702	1451
1	14775183	14779907	4725
1	14780039	14783412	3374
1	14789042	14791011	1970
1	14799231	14800863	1633
1	14802511	14805058	2548
1	14810105	14811612	1508
1	14851743	14852742	1000
1	14861891	14863483	1593
1	14881701	14885021	3321
1	14887296	14889014	1719
1	14892141	14895212	3072
1	14906775	14908038	1264
1	14928706	14929968	1263
1	14985577	14987918	2342
1	14990363	14992735	2373
1	15009763	15011724	1962
1	15020823	15024173	3351
1	15055928	15057471	1544
1	15088780	15095615	6836
1	15098740	15100326	1587
1	15118036	15119303	1268
1	15155594	15157833	2240
1	15176878	15179992	3115
1	15242175	15242879	705
1	15252266	15253588	1323
1	15308435	15310118	1684
1	15326435	15327685	1251
1	15346431	15347146	716
1	15347657	15351951	4295
1	15362152	15362436	285
1	15377462	15379394	1933
1	15379457	15379490	34
1	15379656	15381458	1803
1	15382077	15382551	475
1	15399438	15399449	12
1	15407119	15407560	442
1	15418107	15419090	984
1	15429942	15433576	3635
1	15435674	15437899	2226
1	15439531	15441467	1937
1	15462637	15468738	6102
1	15473840	15475165	1326
1	15475337	15476636	1300
1	15476730	15478142	1413
1	15478505	15478880	376
1	15492066	15493357	1292
1	15501801	15502511	711
1	15504987	15506475	1489
1	15506526	15508424	1899
1	15511651	15513953	2303
1	15516808	15520040	3233
1	15523287	15528838	5552
1	15546129	15549133	3005
1	15557137	15558737	1601
1	15579959	15583114	3156
1	15585920	15586738	819
1	15588395	15589782	1388
1	15598360	15599790	1431
1	15608013	15608820	808
1	15609613	15610547	935
1	15611322	15615505	4184
1	15642168	15644849	2682
1	15696359	15698262	1904
1	15750324	15751568	1245
1	15751863	15753546	1684
1	15754224	15757058	2835
1	15791653	15793015	1363
1	15797849	15799071	1223
1	15810102	15817576	7475
1	15838557	15839956	1400
1	15840125	15841566	1442
1	15845921	15847436	1516
1	15868595	15873146	4552
1	15880718	15884461	3744
1	15885195	15889761	4567
1	15897279	15898500	1222
1	15936397	15939891	3495
1	15947534	15948927	1394
1	15960059	15962306	2248
1	15963327	15964996	1670
1	15965188	15967855	2668
1	15977929	15980693	2765
1	15990019	15990521	503
1	16000056	16001378	1323
1	16035782	16035881	100
1	16043289	16045657	2369
1	16046289	16047712	1424
1	16068421	16073166	4746
1	16074542	16076089	1548
1	16102837	16104919	2083
1	16143737	16145479	1743
1	16145934	16149574	3641
1	16156005	16157172	1168
1	16161322	16167425	6104
1	16168195	16174059	5865
1	16224315	16225906	1592
1	16260045	16262256	2212
1	16263595	16267622	4028
1	16268067	16272279	4213
1	16339651	16341506	1856
1	16348716	16349127	412
1	16352576	16353809	1234
1	16363635	16365698	2064
1	16378288	16380158	1871
1	16382957	16385002	2046
1	16385084	16386299	1216
1	16386387	16395118	8732
1	16438299	16440170	1872
1	16464747	16467253	2507
1	16470818	16472219	1402
1	16489605	16489927	323
1	16523172	16524680	1509
1	16620369	16624554	4186
1	16624745	16626334	1590
1	16631770	16633127	1358
1	16649259	16650751	1493
1	16694290	16696371	2082
1	16710434	16711665	1232
1	16716423	16718725	2303
1	16730203	16732924	2722
1	16735336	16736124	789
1	16789191	16790671	1481
1	16792137	16793749	1613
1	16834686	16836812	2127
1	16865807	16866880	1074
1	16872939	16874881	1943
1	16890665	16893537	2873
1	16910317	16912741	2425
1	16951219	16951313	95
1	16955363	16955363	1
1	16976262	16979851	3590
1	16993898	16996014	2117
1	17052006	17053253	1248
1	17054086	17055119	1034
1	17085393	17086289	897
1	17088402	17090924	2523
1	17095660	17100274	4615
1	17152948	17154916	1969
1	17155153	17157575	2423
1	17160600	17165988	5389
1	17256493	17258860	2368
1	17271689	17272596	908
1	17295302	17297644	2343
1	17300571	17302842	2272
1	17304008	17305223	1216
1	17340337	17340882	546
1	17351991	17354249	2259
1	17357705	17359907	2203
1	17362788	17364006	1219
1	17364079	17365502	1424
1	17489420	17490659	1240
1	17493703	17495379	1677
1	17597204	17598579	1376
1	17628670	17629758	1089
1	17638389	17641076	2688
1	17643876	17645257	1382
1	17674623	17675935	1313
1	17677818	17678005	188
1	17739874	17741423	1550
1	17741540	17744128	2589
1	17752268	17753956	1689
1	17769221	17770045	825
1	17770705	17772904	2200
1	17794537	17795852	1316
1	17815315	17819865	4551
1	17823081	17824295	1215
1	17834400	17836010	1611
1	17836156	17838457	2302
1	17840490	17841924	1435
1	17843968	17845253	1286
1	17864483	17869088	4606
1	17873470	17878290	4821
1	17892254	17894023	1770
1	17896192	17897454	1263
1	17898546	17899934	1389
1	17901653	17903353	1701
1	17905836	17919743	13908
1	17922417	17924811	2395
1	17930214	17931756	1543
1	17938917	17941713	2797
1	17949433	17954416	4984
1	17963409	17964159	751
1	17974938	17976188	1251
1	17980805	17982823	2019
1	17992162	17993561	1400
1	18000143	18007843	7701
1	18008767	18011619	2853
1	18024586	18027053	2468
1	18029619	18032915	3297
1	18038164	18039555	1392
1	18045107	18047046	1940
1	18052906	18054123	1218
1	18060019	18061800	1782
1	18064386	18065644	1259
1	18065918	18067130	1213
1	18072565	18074432	1868
1	18076170	18080341	4172
1	18085613	18087097	1485
1	18090389	18091703	1315
1	18091850	18221192	129343
1	18224226	18224821	596
1	18226382	18227710	1329
1	18229738	18244203	14466
1	18248534	18252096	3563
1	18253399	18255657	2259
1	18268613	18270339	1727
1	18278810	18280873	2064
1	18285023	18288318	3296
1	18298113	18307732	9620
1	18311763	18313237	1475
1	18330380	18330671	292
1	18341942	18343196	1255
1	18349369	18360024	10656
1	18360282	18361939	1658
1	18368986	18373410	4425
1	18381993	18385215	3223
1	18447393	18469508	22116
1	18587025	18593459	6435
1	18686645	18693122	6478
1	18693689	18697711	4023
1	18774831	18778805	3975
1	18786656	18788172	1517
1	18791052	18801903	10852
1	18806806	18809195	2390
1	18819341	18827482	8142
1	18834570	18837784	3215
1	18839046	18842915	3870
1	18852016	18856639	4624
1	18856733	18857974	1242
1	18859100	18861157	2058
1	18874166	18875744	1579
1	18877893	18879426	1534
1	18879752	18896269	16518
1	18904530	18905999	1470
1	18920296	18922877	2582
1	18980870	18983393	2524
1	18991087	18995574	4488
1	19075405	19082535	7131
1	19100942	19111887	10946
1	19112367	19113651	1285
1	19120013	19121702	1690
1	19128122	19130940	2819
1	19165183	19168048	2866
1	19168145	19169596	1452
1	19175097	19178189	3093
1	19246371	19330818	84448
1	19336459	19341000	4542
1	19341837	19345278	3442
1	19471414	19473933	2520
1	19514240	19523623	9384
1	19524558	19526375	1818
1	19585939	19586600	662
1	19626981	19627928	948
1	19635603	19636355	753
1	19681856	19682906	1051
1	19698244	19700854	2611
1	19708013	19712187	4175
1	19728150	19731269	3120
1	19733443	19736727	3285
1	19740549	19744833	4285
1	19762562	19774615	12054
1	19808983	19809679	697
1	19821877	19824447	2571
1	19830906	19834297	3392
1	19835884	19838190	2307
1	19838279	19840380	2102
1	19840392	19841809	1418
1	19852930	19856618	3689
1	19857625	19859439	1815
1	19864906	19868411	3506
1	19869079	19889045	19967
1	19908386	19910858	2473
1	19912626	19913299	674
1	19917767	19919643	1877
1	19926489	19972545	46057
1	19972547	19988996	16450
1	19989133	19996398	7266
1	19996416	20056714	60299
1	20057108	20216287	159180
1	20216420	20284745	68326
1	20284896	20285038	143
1	20285086	20298856	13771
1	20299115	20309894	10780
1	20310198	20329491	19294
1	20330141	20378692	48552
1	20385396	20468384	82989
1	20469045	20502535	33491
1	20503295	20507721	4427
1	20510347	20511592	1246
1	20525323	20530015	4693
1	20549503	20552285	2783
1	20561175	20562505	1331
1	20591623	20593112	1490
1	20593139	20594378	1240
1	20600550	20602355	1806
1	20639951	20642453	2503
1	20696574	20720518	23945
1	20720579	20723987	3409
1	20724055	20728392	4338
1	20729419	20758158	28740
1	20764739	20767017	2279
1	20767313	20780200	12888
1	20784966	20787675	2710
1	20797136	20798647	1512
1	20801275	20806350	5076
1	20824911	20828407	3497
1	20828414	20832538	4125
1	20834407	20837894	3488
1	20839254	20841080	1827
1	20846475	20848745	2271
1	20857327	20861147	3821
1	20866750	20868315	1566
1	20869889	20875023	5135
1	20875764	20877147	1384
1	20879298	20883483	4186
1	20904866	20906478	1613
1	20918674	20920373	1700
1	20921447	20923574	2128
1	20947761	20949326	1566
1	20973297	20974383	1087
1	20994677	20996117	1441
1	21002085	21005107	3023
1	21009972	21011411	1440
1	21028596	21028873	278
1	21057986	21059502	1517
1	21079267	21081294	2028
1	21110752	21111881	1130
1	21121000	21123194	2195
1	21130228	21131837	1610
1	21170126	21171334	1209
1	21183711	21186921	3211
1	21228731	21231111	2381
1	21376898	21378166	1269
1	21435923	21437961	2039
1	21470331	21470888	558
1	21483260	21483954	695
1	21495584	21497239	1656
1	21497332	21512214	14883
1	21516386	21519798	3413
1	21534508	21536153	1646
1	21585661	21587351	1691
1	21614230	21618786	4557
1	21618841	21620071	1231
1	21626971	21627543	573
1	21631757	21634925	3169
1	21635986	21638913	2928
1	21646111	21646896	786
1	21703697	21704947	1251
1	21713767	21717846	4080
1	21737121	21738850	1730
1	21803206	21807175	3970
1	21841201	21843990	2790
1	21846163	21847589	1427
1	21857062	21859513	2452
1	21961468	21962799	1332
1	21971243	21972797	1555
1	21974629	21975251	623
1	22025364	22026957	1594
1	22091833	22093097	1265
1	22127450	22129345	1896
1	22167170	22168291	1122
1	22182028	22183944	1917
1	22186896	22189798	2903
1	22217873	22221868	3996
1	22266160	22270870	4711
1	22271035	22285216	14182
1	22307759	22308696	938
1	22360611	22371326	10716
1	22390893	22395261	4369
1	22448990	22450290	1301
1	22500536	22501869	1334
1	22526766	22527983	1218
1	22538670	22543639	4970
1	22545534	22547325	1792
1	22607118	22608384	1267
1	22625046	22630733	5688
1	22642739	22644078	1340
1	22723753	22729344	5592
1	22781673	22783795	2123
1	22817505	22818758	1254
1	22825175	22826895	1721
1	22828936	22829046	111
1	22829320	22830307	988
1	22856268	22858018	1751
1	22951866	22953875	2010
1	22955162	22956535	1374
1	23013344	23014563	1220
1	23290843	23292070	1228
1	23294778	23296534	1757
1	23355403	23363013	7611
1	23836183	23839115	2933
1	23994638	23998701	4064
1	24192096	24193311	1216
1	24197639	24197757	119
1	24205847	24209303	3457
1	24253152	24257407	4256
1	24483309	24484625	1317
1	24485065	24489370	4306
1	24499220	24502329	3110
1	24508897	24512545	3649
1	24654407	24654455	49
1	24764710	24765611	902
1	25374894	25376103	1210
1	25390442	25393229	2788
1	25393871	25394881	1011
1	25395892	25398305	2414
1	25439284	25440780	1497
1	25451877	25453793	1917
1	25468710	25471476	2767
1	25588896	25591302	2407
1	25592979	25594585	1607
1	25619971	25621756	1786
1	25650192	25652522	2331
1	25661067	25662475	1409
1	25662500	25664149	1650
1	25667321	25673080	5760
1	25696342	25697591	1250
1	25737670	25739981	2312
1	25753604	25754863	1260
1	25766103	25767893	1791
1	25797682	25800630	2949
1	25800675	25804170	3496
1	25806585	25809894	3310
1	25820217	25821592	1376
1	25843554	25844077	524
1	25845039	25845061	23
1	25905276	25906352	1077
1	25909252	25911327	2076
1	25940305	25949184	8880
1	25968646	25971981	3336
1	25985149	25986684	1536
1	26003896	26005355	1460
1	26013206	26014618	1413
1	26065466	26072863	7398
1	26152329	26153892	1564
1	26155723	26157052	1330
1	26160148	26160833	686
1	26192028	26192763	736
1	26225802	26256735	30934
1	26261010	26262344	1335
1	26266216	26267614	1399
1	26294368	26295613	1246
1	26309472	26310143	672
1	26319775	26321793	2019
1	26328797	26331964	3168
1	26345600	26346934	1335
1	26347026	26347248	223
1	26352782	26353635	854
1	26383110	26384695	1586
1	26394816	26398412	3597
1	26403407	26404613	1207
1	26541808	26543428	1621
1	26600209	26602923	2715
1	26603433	26603433	1
1	26609471	26611156	1686
1	26639190	26640378	1189
1	26650131	26651616	1486
1	26660782	26662292	1511
1	26667492	26670435	2944
1	26682184	26683527	1344
1	26688700	26689942	1243
1	26724411	26727887	3477
1	26746331	26747690	1360
1	26757847	26758197	351
1	26764010	26771122	7113
1	26771131	26776903	5773
1	26778226	26783746	5521
1	26784109	26787988	3880
1	26813709	26815174	1466
1	26825774	26827000	1227
1	26846778	26848044	1267
1	26850834	26852200	1367
1	26854820	26856129	1310
1	26857247	26858714	1468
1	26883130	26885049	1920
1	26889300	26898695	9396
1	26898944	26899248	305
1	26899664	26902840	3177
1	26902893	26904087	1195
1	26924338	26925470	1133
1	26927024	26927251	228
1	26927704	26929872	2169
1	26950767	26951268	502
1	26954124	26954862	739
1	26957327	26958729	1403
1	26961686	26961812	127
1	26961953	26963694	1742
1	26965495	26968822	3328
1	26976900	26979007	2108
1	26993268	26995237	1970
1	26999920	27001535	1616
1	27020487	27022324	1838
1	27035060	27075853	40794
1	27076521	27078087	1567
1	27108760	27115685	6926
1	27116058	27119072	3015
1	27124654	27126366	1713
1	27145423	27149882	4460
1	27149892	27151299	1408
1	27152190	27154047	1858
1	27163236	27165175	1940
1	27165827	27167180	1354
1	27173366	27174891	1526
1	27184101	27186378	2278
1	27197055	27199207	2153
1	27216424	27217641	1218
1	27232020	27233801	1782
1	27247939	27248994	1056
1	27252353	27253872	1520
1	27274185	27275764	1580
1	27390931	27393208	2278
1	27505524	27506847	1324
1	27531547	27533719	2173
1	27542681	27544250	1570
1	27568263	27569862	1600
1	27569885	27571558	1674
1	27579812	27582037	2226
1	27601533	27603264	1732
1	27612254	27619519	7266
1	27627139	27629368	2230
1	27637355	27639195	1841
1	27661391	27662334	944
1	27678024	27679144	1121
1	27683205	27684754	1550
1	27690806	27692248	1443
1	27694083	27698969	4887
1	27704929	27705519	591
1	27705890	27709542	3653
1	27724652	27726276	1625
1	27726373	27727616	1244
1	27727817	27730083	2267
1	27731277	27732266	990
1	27756230	27758670	2441
1	27771860	27773202	1343
1	27773362	27774553	1192
1	27808143	27809720	1578
1	27810750	27812262	1513
1	27835572	27837304	1733
1	27841144	27843273	2130
1	27844709	27845199	491
1	27846272	27846515	244
1	27853137	27853907	771
1	27855159	27857406	2248
1	27860100	27862480	2381
1	27964686	27965953	1268
1	27981462	27984457	2996
1	28033726	28034610	885
1	28052547	28060521	7975
1	28260599	28261592	994
1	28421389	28423166	1778
1	28478646	28479970	1325
1	28482831	28484490	1660
1	28573729	28575456	1728
1	28602755	28603082	328
1	28803262	28804628	1367
1	28804753	28808042	3290
1	28821477	28823690	2214
1	28836737	28842476	5740
1	28869890	28871144	1255
1	28889722	28891777	2056
1	28924328	28925712	1385
1	29077228	29078710	1483
1	29214392	29214547	156
1	29242088	29243168	1081
1	29249491	29250907	1417
1	29256076	29257798	1723
1	29260556	29260814	259
1	29315218	29316139	922
1	29318142	29318975	834
1	29564319	29565403	1085
1	29568082	29569454	1373
1	29576136	29577238	1103
1	29577901	29577901	1
1	29679337	29680404	1068
1	29686922	29688113	1192
1	29699429	29700038	610
1	29707414	29707827	414
1	29788091	29789474	1384
1	29806072	29807454	1383
1	29866352	29867725	1374
1	30043621	30044614	994
1	30165347	30167081	1735
1	30202472	30202659	188
1	30202807	30203725	919
1	30204833	30205002	170
1	30389755	30390044	290
1	30391501	30395205	3705
1	30397300	30399043	1744
1	30490688	30490703	16
1	30490759	30492947	2189
1	30493817	30494235	419
1	30495459	30496649	1191
1	30684561	30687228	2668
1	30691985	30695857	3873
1	30697641	30700654	3014
1	30726038	30730341	4304
1	30855920	30855920	1
1	30868339	30870047	1709
1	30936271	30937726	1456
1	30978607	30981196	2590
1	30983540	30984401	862
1	30984634	30985669	1036
1	30985794	30986412	619
1	30986541	30987625	1085
1	31023674	31025333	1660
1	31058559	31059614	1056
1	31125295	31126781	1487
1	31188255	31188950	696
1	31311646	31313999	2354
1	31324560	31325759	1200
1	31353161	31354484	1324
1	31366265	31369414	3150
1	31554735	31556330	1596
1	31557558	31559291	1734
1	31567734	31568373	640
1	31577247	31579762	2516
1	31605904	31609829	3926
1	31652444	31653763	1320
1	31654949	31659352	4404
1	31737404	31739023	1620
1	31792917	31794564	1648
1	31949977	31951083	1107
1	32144865	32146246	1382
1	32148421	32149822	1402
1	32212801	32213100	300
1	32214302	32214881	580
1	32238830	32240161	1332
1	32295741	32296026	286
1	32306013	32307907	1895
1	32307982	32308225	244
1	32308290	32309584	1295
1	32309619	32310377	759
1	32320287	32322238	1952
1	32372483	32372840	358
1	32373691	32374290	600
1	32377912	32378787	876
1	32393208	32394876	1669
1	32395515	32396899	1385
1	32399029	32399608	580
1	32533724	32535732	2009
1	32535825	32537685	1861
1	32622175	32626094	3920
1	32626150	32630695	4546
1	32645387	32647377	1991
1	32679955	32681616	1662
1	32689621	32691656	2036
1	32714951	32716199	1249
1	32720251	32721779	1529
1	32723239	32723644	406
1	32729561	32731987	2427
1	32744459	32745674	1216
1	32764678	32766090	1413
1	32887966	32888458	493
1	32895588	32897383	1796
1	32906235	32906973	739
1	32910857	32912774	1918
1	32913001	32915483	2483
1	33047370	33048585	1216
1	33067906	33068200	295
1	33070673	33071507	835
1	33076343	33077893	1551
1	33080099	33081477	1379
1	33102000	33102545	546
1	33135326	33137519	2194
1	33152168	33157519	5352
1	33167885	33169715	1831
1	33178359	33179592	1234
1	33194318	33195741	1424
1	33223683	33223739	57
1	33227028	33228897	1870
1	33229220	33230110	891
1	33243809	33244087	279
1	33291112	33292256	1145
1	33296888	33298900	2013
1	33298969	33302478	3510
1	33344367	33349977	5611
1	33351064	33352213	1150
1	33352387	33353688	1302
1	33377519	33378904	1386
1	33383312	33388401	5090
1	33390780	33393684	2905
1	33405151	33409643	4493
1	33430151	33434219	4069
1	33456054	33458644	2591
1	33461536	33463684	2149
1	33474358	33479723	5366
1	33515892	33517506	1615
1	33520439	33523127	2689
1	33544947	33544996	50
1	33552386	33553693	1308
1	33556784	33557432	649
1	33594984	33596426	1443
1	33601447	33603612	2166
1	33606255	33608266	2012
1	33608805	33610759	1955
1	33623645	33624901	1257
1	33629046	33630464	1419
1	33687623	33689207	1585
1	33689317	33690723	1407
1	33715261	33716483	1223
1	33722943	33724558	1616
1	33757336	33760397	3062
1	33789278	33790938	1661
1	33822612	33824339	1728
1	33847038	33849585	2548
1	33853554	33856195	2642
1	33895705	33897342	1638
1	33928155	33930077	1923
1	33935327	33939839	4513
1	33950445	33952615	2171
1	34011692	34012820	1129
1	34050344	34051966	1623
1	34097700	34101056	3357
1	34108106	34146927	38822
1	34153216	34196938	43723
1	34209574	34211865	2292
1	34229495	34230802	1308
1	34231253	34234203	2951
1	34253591	34256958	3368
1	34271499	34273723	2225
1	34288653	34291486	2834
1	34311813	34315015	3203
1	34323906	34327987	4082
1	34418240	34421679	3440
1	34482901	34483081	181
1	34484808	34485545	738
1	34485613	34486488	876
1	34580462	34583554	3093
1	34585067	34587344	2278
1	34609291	34615024	5734
1	34615082	34615094	13
1	34615247	34616476	1230
1	34617285	34619905	2621
1	34669126	34669929	804
1	34720054	34720830	777
1	34720856	34721302	447
1	34869002	34870494	1493
1	34929223	34930860	1638
1	35022060	35023425	1366
1	35073996	35075617	1622
1	35075953	35078057	2105
1	35134539	35136462	1924
1	35213040	35218360	5321
1	35249474	35254567	5094
1	35265855	35270597	4743
1	35272895	35274717	1823
1	35275036	35276518	1483
1	35276649	35280482	3834
1	35280605	35285145	4541
1	35285374	35287609	2236
1	35288471	35289775	1305
1	35290863	35293164	2302
1	35297766	35299554	1789
1	35304314	35306429	2116
1	35306499	35312892	6394
1	35426422	35440538	14117
1	35459108	35460618	1511
1	35463212	35464873	1662
1	35541016	35543087	2072
1	35544506	35545934	1429
1	35556216	35557820	1605
1	35559297	35562156	2860
1	35569915	35572365	2451
1	35591057	35592773	1717
1	35602398	35606969	4572
1	35612245	35614275	2031
1	35668698	35670680	1983
1	35706571	35707946	1376
1	35720008	35721864	1857
1	35728537	35729322	786
1	35730925	35805775	74851
1	35806332	35812173	5842
1	35812310	35849633	37324
1	35850801	35856686	5886
1	35859918	35872296	12379
1	35874955	35876114	1160
1	35876691	35943563	66873
1	35944201	35948826	4626
1	35949161	35982565	33405
1	36082203	36087724	5522
1	36180582	36209798	29217
1	36220173	36279076	58904
1	36722618	36730354	7737
1	36805314	36811238	5925
1	36859913	36861254	1342
1	36882925	36884425	1501
1	36930045	36931309	1265
1	37015907	37017122	1216
1	37041309	37041309	1
1	37136285	37138363	2079
1	37281540	37284715	3176
1	37285907	37288504	2598
1	37288566	37290956	2391
1	37331842	37333644	1803
1	37348708	37349761	1054
1	37396397	37397525	1129
1	37402147	37404174	2028
1	37407554	37408913	1360
1	37422172	37425827	3656
1	37432300	37433833	1534
1	37434848	37436192	1345
1	37438813	37440157	1345
1	37467918	37469209	1292
1	37557950	37559658	1709
1	37586821	37588640	1820
1	37594558	37595796	1239
1	37628719	37630124	1406
1	37641202	37642574	1373
1	37650855	37652441	1587
1	37652758	37655946	3189
1	37717334	37719660	2327
1	37730565	37730898	334
1	37750763	37752358	1596
1	37851042	37852310	1269
1	37877944	37879689	1746
1	37882399	37884632	2234
1	38034823	38202085	167263
1	38203416	38267300	63885
1	38273203	38302775	29573
1	38303188	38339899	36712
1	38341485	38350751	9267
1	38359648	38399165	39518
1	38404125	38412586	8462
1	38438413	38453480	15068
1	38454045	38454566	522
1	38552448	38555325	2878
1	38742702	38744713	2012
1	38958359	38963067	4709
1	39020302	39023436	3135
1	39033714	39043677	9964
1	39059500	39071078	11579
1	39106402	39111713	5312
1	39207870	39213528	5659
1	39226059	39233341	7283
1	39233551	39238708	5158
1	39263890	39271080	7191
1	39408052	39412971	4920
1	39502094	39503598	1505
1	39538690	39540479	1790
1	39541167	39541336	170
1	39638472	39638510	39
1	39638535	39639954	1420
1	39646514	39647094	581
1	39780434	39785611	5178
1	39808812	39810094	1283
1	39838889	39840334	1446
1	39874880	39876009	1130
1	40083591	40084989	1399
1	40469750	40481450	11701
1	40696249	40711619	15371
1	40862691	40865093	2403
1	40908655	40911013	2359
1	40924492	40927762	3271
1	40993082	40995907	2826
1	41077924	41079346	1423
1	41183441	41185021	1581
1	41483760	41495481	11722
1	41573890	41588609	14720
1	41589133	41594656	5524
1	41596068	41612676	16609
1	41614327	41615423	1097
1	41623166	41630676	7511
1	41640860	41649952	9093
1	41650240	41654826	4587
1	41656361	41744778	88418
1	41841690	41843118	1429
1	41966341	41967304	964
1	42160004	42165406	5403
1	42174383	42180046	5664
1	42264009	42266447	2439
1	42967766	42972769	5004
1	42997038	42999339	2302
1	43054520	43054567	48
1	43097238	43098490	1253
1	43249024	43250211	1188
1	43254123	43266763	12641
1	43495053	43496174	1122
1	43636406	43638743	2338
1	43720681	43721894	1214
1	43749400	43751998	2599
1	43779187	43793764	14578
1	43844170	43847010	2841
1	43848788	43850649	1862
1	44289142	44290676	1535
1	44290785	44292965	2181
1	44308020	44311246	3227
1	44332789	44333809	1021
1	44403701	44417099	13399
1	44429574	44431899	2326
1	44943217	44944827	1611
1	44944863	44947007	2145
1	44978456	44980981	2526
1	44983455	44986515	3061
1	44994743	44997778	3036
1	45081479	45135382	53904
1	45138107	45213419	75313
1	45215138	45236058	20921
1	45236820	45297608	60789
1	45301451	45304317	2867
1	45304452	45305984	1533
1	45326096	45338554	12459
1	45338647	45349181	10535
1	45349906	45356105	6200
1	45383082	45385355	2274
1	45408454	45410033	1580
1	45418257	45420155	1899
1	45422742	45424322	1581
1	45433810	45435125	1316
1	45481542	45482837	1296
1	45500125	45502214	2090
1	45507830	45508439	610
1	45567459	45568868	1410
1	45630441	45631888	1448
1	45696096	45698906	2811
1	45733714	45735413	1700
1	45777750	45779000	1251
1	45861016	45863747	2732
1	45923165	45923246	82
1	45929324	45931086	1763
1	45931124	45933949	2826
1	45933962	45934120	159
1	45935246	45936637	1392
1	45963603	45964963	1361
1	46107532	46109077	1546
1	46188567	46196580	8014
1	46539785	46561015	21231
1	46562552	46572031	9480
1	46573582	46576832	3251
1	46577659	46753649	175991
1	46754156	46806793	52638
1	46813997	46820708	6712
1	46891913	46936354	44442
1	46963967	46965995	2029
1	47129051	47130218	1168
1	47199424	47200671	1248
1	47416953	47440513	23561
1	47441478	47455611	14134
1	47487444	47490459	3016
1	47601009	47608575	7567
1	47614817	47623629	8813
1	47624636	47640780	16145
1	47909183	47911507	2325
1	47991620	47994279	2660
1	48032996	48037794	4799
1	48097285	48098523	1239
1	48099258	48100729	1472
1	48100765	48101234	470
1	48130066	48131663	1598
1	48273269	48274802	1534
1	48281020	48285409	4390
1	48324353	48326167	1815
1	48328701	48331955	3255
1	48332618	48335225	2608
1	48984670	48986062	1393
1	49305033	49306506	1474
1	49306624	49308472	1849
1	49308933	49311129	2197
1	49436926	49438587	1662
1	49440845	49444801	3957
1	49730699	49732039	1341
1	49732906	49734111	1206
1	49739267	49741004	1738
1	49741400	49745992	4593
1	49746632	49747930	1299
1	49748652	49752441	3790
1	49753507	49768778	15272
1	49831483	49833155	1673
1	50014177	50014983	807
1	50944769	50947169	2401
1	50969256	50970825	1570
1	50971459	50979440	7982
1	51093222	51094893	1672
1	51098438	51100030	1593
1	51186351	51186414	64
1	51206790	51216550	9761
1	51237658	51241005	3348
1	51244270	51246939	2670
1	51257278	51258971	1694
1	51264484	51267379	2896
1	51342000	51344223	2224
1	51421177	51426665	5489
1	51482180	51486631	4452
1	51557793	51560085	2293
1	51661791	51663884	2094
1	51883215	51884184	970
1	51973487	51975607	2121
1	52144681	52164544	19864
1	52224236	52227178	2943
1	52246583	52250839	4257
1	52337408	52342938	5531
1	52424096	52429268	5173
1	52643994	52660871	16878
1	52671334	52672956	1623
1	52678921	52685673	6753
1	52690881	52697450	6570
1	53006396	53007245	850
1	53046806	53048178	1373
1	53061580	53064847	3268
1	53091605	53093076	1472
1	53105505	53114769	9265
1	53115180	53116383	1204
1	53116477	53118406	1930
1	53119957	53126027	6071
1	53139460	53142482	3023
1	53165165	53166777	1613
1	53168066	53169449	1384
1	53174526	53177043	2518
1	53177153	53189786	12634
1	53189911	53197090	7180
1	53208292	53209921	1630
1	53212553	53213758	1206
1	53221971	53223272	1302
1	53226583	53228084	1502
1	53236487	53238430	1944
1	53238476	53241785	3310
1	53244553	53257749	13197
1	53259972	53261316	1345
1	53284667	53286553	1887
1	53287339	53292362	5024
1	53295475	53297283	1809
1	53317126	53319669	2544
1	53325868	53327119	1252
1	53327360	53329037	1678
1	53331850	53333056	1207
1	53333731	53363076	29346
1	53363235	53379013	15779
1	53397219	53399660	2442
1	53400132	53403348	3217
1	53404493	53407025	2533
1	53409477	53410985	1509
1	53436897	53438021	1125
1	53441786	53444621	2836
1	53453720	53455821	2102
1	53490239	53491611	1373
1	53553819	53562368	8550
1	53597045	53603605	6561
1	53605603	53608415	2813
1	53608565	53609803	1239
1	53609857	53611306	1450
1	53618049	53619359	1311
1	53626335	53627812	1478
1	53643164	53645861	2698
1	53648495	53648628	134
1	53650542	53651842	1301
1	53654826	53669106	14281
1	53669647	53670680	1034
1	53882416	53884935	2520
1	54187217	54189806	2590
1	54209293	54211081	1789
1	54305192	54305690	499
1	54329773	54344663	14891
1	54350056	54358603	8548
1	54423066	54424132	1067
1	54528764	54533236	4473
1	54541511	54548007	6497
1	54673404	54676051	2648
1	54822943	54822987	45
1	54823365	54825718	2354
1	54904827	54914885	10059
1	54915525	54916852	1328
1	54922440	54952606	30167
1	54953275	54960831	7557
1	54961233	54969772	8540
1	54970149	54976732	6584
1	55021523	55023417	1895
1	55052079	55055418	3340
1	55055467	55081595	26129
1	55085990	55089998	4009
1	55123955	55134811	10857
1	55136101	55138516	2416
1	55328033	55333653	5621
1	55355074	55356657	1584
1	55381140	55383908	2769
1	55415857	55418078	2222
1	55429834	56240767	810934
1	56241848	56467713	225866
1	56468846	56630965	162120
1	56631848	56762698	130851
1	56763325	56765928	2604
1	56766095	56877624	111530
1	56880370	56915039	34670
1	56916507	57009793	93287
1	57010654	57038117	27464
1	57050938	57053253	2316
1	57167474	57168619	1146
1	57220287	57231229	10943
1	57232620	57234935	2316
1	57235047	57236257	1211
1	57242140	57243761	1622
1	57245328	57246714	1387
1	57267284	57269858	2575
1	57270856	57274772	3917
1	57282005	57289659	7655
1	57296987	57303652	6666
1	57316154	57317483	1330
1	57322710	57325913	3204
1	57338597	57352140	13544
1	57389143	57389358	216
1	57389490	57393635	4146
1	57584002	57586490	2489
1	57589264	57604710	15447
1	57617406	57623454	6049
1	57652655	57655040	2386
1	57812531	57822405	9875
1	57823365	57823614	250
1	57834729	57843807	9079
1	57850307	57853431	3125
1	57893026	57899743	6718
1	57926724	57975668	48945
1	58005762	58013204	7443
1	58016068	58017576	1509
1	58030392	58039709	9318
1	58084709	58086338	1630
1	58087169	58091456	4288
1	58223314	58224406	1093
1	58250009	58251856	1848
1	58283181	58462053	178873
1	58462383	58466409	4027
1	58470507	58472161	1655
1	58852705	58854695	1991
1	58859223	58860707	1485
1	58923819	58928483	4665
1	59243531	59245553	2023
1	59498375	59500122	1748
1	59531282	59533503	2222
1	59538337	59540119	1783
1	59549781	59555081	5301
1	59572561	59575536	2976
1	59596489	59666749	70261
1	59667329	59682337	15009
1	59729605	59731946	2342
1	59755222	59808593	53372
1	59809832	59864464	54633
1	59865242	59879947	14706
1	59881314	59964880	83567
1	59965272	60001562	36291
1	60002603	60225731	223129
1	60245080	60252111	7032
1	60342901	60351178	8278
1	60871296	60875803	4508
1	60882258	60890011	7754
1	61119867	61186909	67043
1	61191839	61336036	144198
1	61338778	61391515	52738
1	61392575	61434355	41781
1	61437848	61471728	33881
1	61472446	61486687	14242
1	61492315	61567841	75527
1	61570369	61602792	32424
1	61604612	61666650	62039
1	61982440	61982983	544
1	61986403	61987185	783
1	61988353	62004819	16467
1	62006199	62013967	7769
1	62014935	62030786	15852
1	62034153	62082478	48326
1	62085422	62149910	64489
1	62159524	62235136	75613
1	62237227	62289606	52380
1	62290575	62340296	49722
1	62348413	62350548	2136
1	62350805	62352037	1233
1	62352938	62379383	26446
1	62383072	62491719	108648
1	62493710	62532051	38342
1	62665884	62673216	7333
1	62769582	62777643	8062
1	62802950	62806185	3236
1	62914231	62917657	3427
1	62918616	62919921	1306
1	62982169	62984206	2038
1	63065017	63066367	1351
1	63083992	63097677	13686
1	63300051	63326133	26083
1	63471445	63489386	17942
1	63491502	63541221	49720
1	63544471	63573775	29305
1	63825767	63831347	5581
1	63874695	63876591	1897
1	64033045	64035531	2487
1	64036091	64104725	68635
1	64148982	64156502	7521
1	64171934	64177324	5391
1	64178398	64180891	2494
1	64181664	64193554	11891
1	64412007	64415385	3379
1	64573251	64579137	5887
1	64827833	64853126	25294
1	64854397	64885171	30775
1	64888084	64935449	47366
1	65642154	65647502	5349
1	65650443	65654056	3614
1	65827405	65853094	25690
1	65929615	65933974	4360
1	65945197	65954863	9667
1	66012961	66042161	29201
1	66102874	66103231	358
1	66106308	66139566	33259
1	66164207	66165803	1597
1	66178255	66180440	2186
1	66195041	66196131	1091
1	66258356	66261480	3125
1	66295900	66302979	7080
1	66406154	66415389	9236
1	66579277	66581098	1822
1	66583973	66619750	35778
1	66623599	66629359	5761
1	66630178	66642163	11986
1	66642549	66671472	28924
1	66684808	66742184	57377
1	66743546	66806866	63321
1	66807803	66822454	14652
1	66823071	66826188	3118
1	66828017	66852383	24367
1	66857466	66869851	12386
1	66937138	66967028	29891
1	66967643	66971460	3818
1	66974973	66997867	22895
1	67000173	67053730	53558
1	67741072	67759723	18652
1	67959260	67963243	3984
1	68002233	68003462	1230
1	68320125	68447330	127206
1	68641365	68646238	4874
1	68715192	68720235	5044
1	68735091	68747276	12186
1	68751349	68758001	6653
1	68861277	68878488	17212
1	69092746	69142326	49581
1	69144657	69156232	11576
1	69156756	69156974	219
1	69157821	69161810	3990
1	69162314	69163824	1511
1	69163894	69164772	879
1	69164810	69165955	1146
1	69168300	69190875	22576
1	69191720	69207855	16136
1	69208096	69209521	1426
1	69211233	69243119	31887
1	69244572	69522312	277741
1	69523718	69526054	2337
1	69588734	69589985	1252
1	69608263	69609892	1630
1	69850004	69851505	1502
1	69851694	69853559	1866
1	69856305	69860650	4346
1	69862237	69863778	1542
1	69884138	69887428	3291
1	69888439	69891556	3118
1	69911867	69916477	4611
1	70006515	70009456	2942
1	70189227	70190969	1743
1	70224982	70226213	1232
1	70232327	70233630	1304
1	70244260	70249241	4982
1	70343768	70345448	1681
1	70538302	70539838	1537
1	70658333	70658567	235
1	70675810	70681390	5581
1	70681999	70684198	2200
1	70711542	70711766	225
1	70824754	70831237	6484
1	71302435	71303662	1228
1	71445085	71445879	795
1	71761606	71767506	5901
1	71767637	71769441	1805
1	72269758	72270107	350
1	72273246	72285854	12609
1	72341307	72366959	25653
1	72563468	72565030	1563
1	72716058	72717278	1221
1	72723558	72727970	4413
1	72729327	72730947	1621
1	72780802	72783982	3181
1	72830514	72832898	2385
1	72911897	72913238	1342
1	72917911	72918261	351
1	72928567	72929263	697
1	73110408	73114129	3722
1	73117593	73119815	2223
1	73237023	73242237	5215
1	73543071	73553530	10460
1	74016498	74032104	15607
1	74053343	74078137	24795
1	74599328	74601325	1998
1	74985194	74986368	1175
1	75393651	75394280	630
1	76259208	76259764	557
1	76431988	76434691	2704
1	76455479	76458129	2651
1	76565063	76566288	1226
1	76728547	76732527	3981
1	77148094	77148423	330
1	77667166	77670136	2971
1	77673023	77674927	1905
1	78830133	78831113	981
1	78927293	78928516	1224
1	78971971	78972324	354
1	78972808	78975106	2299
1	78995616	78999931	4316
1	79000034	79004515	4482
1	79004529	79005345	817
1	79100609	79103922	3314
1	79273368	79292185	18818
1	79947498	79948784	1287
1	80653841	80659433	5593
1	80754587	80756141	1555
1	80770136	80770831	696
1	81856338	81917504	61167
1	82210482	82211451	970
1	82262184	82264809	2626
1	82264860	82265857	998
1	82271135	82274026	2892
1	82280616	82282957	2342
1	82290720	82306466	15747
1	82306818	82311546	4729
1	82326990	82328056	1067
1	82336407	82337941	1535
1	82582328	82592032	9705
1	82677959	82681394	3436
1	82700297	82701996	1700
1	82830683	82891132	60450
1	82926545	82926639	95
1	82960900	82962231	1332
1	83034783	83040961	6179
1	83230535	83232339	1805
1	83237811	83248924	11114
1	83404140	83405416	1277
1	83412138	83413721	1584
1	83413755	83415051	1297
1	83415143	83417363	2221
1	83442680	83444243	1564
1	83462199	83463359	1161
1	83529436	83530127	692
1	83870320	83874981	4662
1	83875684	83876082	399
1	83876992	83877458	467
1	83877933	83881067	3135
1	83881656	83882471	816
1	83914360	83921307	6948
1	83951169	83954793	3625
1	84372561	84378528	5968
1	85321940	85324432	2493
1	85369351	85412134	42784
1	85422813	85459110	36298
1	86045017	86047642	2626
1	86112597	86122159	9563
1	86124288	86129181	4894
1	86137574	86139098	1525
1	86140954	86145613	4660
1	86277478	86279675	2198
1	86286363	86291051	4689
1	86291293	86292187	895
1	86292593	86297685	5093
1	86463509	86463718	210
1	86463771	86465548	1778
1	86495979	86498175	2197
1	86503713	86506174	2462
1	86507930	86509531	1602
1	86849691	86852248	2558
1	87021063	87030906	9844
1	87493504	87508027	14524
1	87588353	87595513	7161
1	87637005	87639262	2258
1	87657505	87664648	7144
1	87670999	87675811	4813
1	87681594	87754134	72541
1	87759992	87796197	36206
1	87804425	87834321	29897
1	87849438	87854060	4623
1	87854698	87856605	1908
1	88055462	88056760	1299
1	88831695	88833844	2150
1	88835743	88838986	3244
1	88853977	88855612	1636
1	88925848	88930645	4798
1	88947671	88952175	4505
1	89065970	89065981	12
1	89066597	89067404	808
1	89076731	89078378	1648
1	89255463	89263737	8275
1	89273408	89274698	1291
1	89275088	89276840	1753
1	89278587	89280806	2220
1	89380597	89382285	1689
1	89597804	89603690	5887
1	89923711	89926218	2508
1	90225959	90229346	3388
1	90295083	90305077	9995
1	90310095	90313106	3012
1	90398541	90402825	4285
1	90888888	90889329	442
1	90889364	90890211	848
1	90903421	90906381	2961
1	90916869	90924643	7775
1	91066598	91069171	2574
1	91126522	91132589	6068
1	91138469	91144374	5906
1	91150934	91154335	3402
1	91158511	91169000	10490
1	91181089	91184219	3131
1	91196099	91207281	11183
1	91227710	91231283	3574
1	91384452	91389367	4916
1	92135482	92138313	2832
1	92141484	92142823	1340
1	92146630	92150125	3496
1	92362169	92369155	6987
1	92372477	92433156	60680
1	92442071	92457857	15787
1	92480812	92483526	2715
1	92528179	92537236	9058
1	92545686	92554185	8500
1	92565987	92577845	11859
1	92588134	92601041	12908
1	92607864	92623340	15477
1	92627612	92652249	24638
1	92661679	92662567	889
1	92685790	92699194	13405
1	92788083	92799437	11355
1	92818551	92822431	3881
1	92967931	92968200	270
1	93012380	93014175	1796
1	93232619	93235310	2692
[truncated: 47,383 more rows]

## Sheet: ML
Chromosome	Start	End	Length(bp)
1	549255	555652	6398
1	580737	624486	43750
1	630451	658407	27957
1	659349	807444	148096
1	810365	815495	5131
1	816392	823098	6707
1	857078	863206	6129
1	885666	890134	4469
1	953251	959643	6393
1	1019998	1020490	493
1	1021329	1023129	1801
1	1103128	1105062	1935
1	1137290	1139877	2588
1	1143839	1145475	1637
1	1150350	1158929	8580
1	1253710	1261563	7854
1	1281810	1283199	1390
1	1409198	1409433	236
1	1610587	1613445	2859
1	1644586	1646467	1882
1	1680102	1681292	1191
1	1701579	1704572	2994
1	1761084	1765254	4171
1	1772019	1773736	1718
1	1897124	1898338	1215
1	1898693	1900512	1820
1	1934996	1936435	1440
1	1967033	1968611	1579
1	1978919	1980416	1498
1	2055513	2056880	1368
1	2069059	2070473	1415
1	2080171	2080199	29
1	2080207	2082906	2700
1	2087471	2143340	55870
1	2241259	2246827	5569
1	2247315	2248548	1234
1	2414242	2415297	1056
1	2557360	2565093	7734
1	2598207	2598961	755
1	2602832	2605082	2251
1	2606553	2607793	1241
1	2610241	2611417	1177
1	2611804	2613112	1309
1	2640409	2649036	8628
1	2649459	2664621	15163
1	2666449	2669976	3528
1	2671178	2699191	28014
1	2699257	2701411	2155
1	2701823	2728097	26275
1	2730052	2829603	99552
1	2830742	2832357	1616
1	2844669	2846627	1959
1	2846640	2847841	1202
1	2886200	2888437	2238
1	2889882	2891250	1369
1	2905695	2909407	3713
1	2982536	2986575	4040
1	3249527	3253313	3787
1	3276257	3321109	44853
1	3338304	3339993	1690
1	3347500	3348591	1092
1	3410889	3411567	679
1	3436516	3437199	684
1	3440111	3446127	6017
1	3446225	3447803	1579
1	3450924	3452130	1207
1	3457439	3459028	1590
1	3465064	3465897	834
1	3504549	3509284	4736
1	3510062	3511413	1352
1	3524502	3528698	4197
1	3531485	3533052	1568
1	3544315	3546916	2602
1	3552887	3554595	1709
1	3585595	3587726	2132
1	3588769	3590284	1516
1	3594915	3596137	1223
1	3617077	3618557	1481
1	3620347	3621755	1409
1	3621865	3623095	1231
1	3637981	3642429	4449
1	3642689	3644312	1624
1	3668564	3669965	1402
1	3670494	3672489	1996
1	3676958	3678269	1312
1	3722383	3723691	1309
1	3727749	3728334	586
1	3745767	3746788	1022
1	3749552	3750886	1335
1	3774695	3777175	2481
1	3784396	3788240	3845
1	3791354	3796737	5384
1	3801130	3803524	2395
1	3811497	3814631	3135
1	3862093	3863738	1646
1	3866021	3867383	1363
1	3874110	3875483	1374
1	3929208	3934674	5467
1	3937009	3938319	1311
1	3942072	3945027	2956
1	3953721	3956408	2688
1	3994168	3996029	1862
1	3997836	4000489	2654
1	4014876	4016648	1773
1	4053010	4058344	5335
1	4058903	4061654	2752
1	4062012	4064098	2087
1	4067774	4071421	3648
1	4071628	4072841	1214
1	4076507	4077134	628
1	4083711	4085867	2157
1	4086135	4087809	1675
1	4099091	4103194	4104
1	4109126	4110448	1323
1	4110661	4112629	1969
1	4148156	4150868	2713
1	4180786	4183916	3131
1	4203957	4205859	1903
1	4226152	4227309	1158
1	4230062	4247098	17037
1	4257782	4260407	2626
1	4264899	4268563	3665
1	4272526	4274314	1789
1	4312894	4349856	36963
1	4358593	4360801	2209
1	4371457	4384976	13520
1	4385153	4395400	10248
1	4414721	4416290	1570
1	4448648	4461121	12474
1	4462128	4463987	1860
1	4464112	4469075	4964
1	4472627	4474289	1663
1	4474344	4477271	2928
1	4481204	4482732	1529
1	4510531	4512046	1516
1	4516885	4518208	1324
1	4540865	4544206	3342
1	4561879	4566923	5045
1	4583279	4585475	2197
1	4614151	4618282	4132
1	4620860	4622316	1457
1	4664056	4674567	10512
1	4680790	4682979	2190
1	4703427	4704705	1279
1	4714929	4716187	1259
1	4725562	4727385	1824
1	4970594	4975579	4986
1	4983027	4985959	2933
1	4992010	4993413	1404
1	5016016	5023841	7826
1	5063823	5084301	20479
1	5095166	5095989	824
1	5114549	5123158	8610
1	5125639	5162150	36512
1	5162404	5166154	3751
1	5173365	5184954	11590
1	5217879	5219115	1237
1	5224438	5227488	3051
1	5228431	5230961	2531
1	5270992	5272535	1544
1	5288713	5292103	3391
1	5306513	5307054	542
1	5308465	5309936	1472
1	5311761	5314122	2362
1	5314168	5315719	1552
1	5319032	5320947	1916
1	5322448	5330189	7742
1	5330220	5332519	2300
1	5369378	5371108	1731
1	5371170	5372780	1611
1	5372787	5374606	1820
1	5380280	5387971	7692
1	5393961	5395860	1900
1	5400297	5402588	2292
1	5403365	5406555	3191
1	5406792	5415306	8515
1	5415571	5416838	1268
1	5417583	5419619	2037
1	5419800	5431544	11745
1	5437806	5442579	4774
1	5448909	5454821	5913
1	5457529	5458975	1447
1	5478212	5479629	1418
1	5481193	5483237	2045
1	5492487	5494832	2346
1	5499397	5500701	1305
1	5507603	5510074	2472
1	5510478	5511850	1373
1	5521569	5522885	1317
1	5524150	5525702	1553
1	5529222	5530458	1237
1	5537043	5538823	1781
1	5540190	5542690	2501
1	5551943	5553404	1462
1	5562426	5564785	2360
1	5564917	5580747	15831
1	5586023	5587723	1701
1	5625510	5628728	3219
1	5635030	5640801	5772
1	5658329	5659829	1501
1	5661660	5661727	68
1	5661762	5663446	1685
1	5663470	5665383	1914
1	5666776	5668208	1433
1	5669090	5674098	5009
1	5697616	5699172	1557
1	5711591	5713111	1521
1	5733132	5734996	1865
1	5739096	5740456	1361
1	5742382	5743787	1406
1	5755614	5756975	1362
1	5765829	5769945	4117
1	5772620	5773908	1289
1	5792841	5794265	1425
1	5799512	5804646	5135
1	5808135	5809453	1319
1	5815258	5819918	4661
1	5827109	5827239	131
1	5827254	5828887	1634
1	5829035	5830328	1294
1	5831355	5834331	2977
1	5835085	5844848	9764
1	5844937	5846226	1290
1	5860304	5861718	1415
1	5868217	5869775	1559
1	5883680	5885423	1744
1	5887513	5890277	2765
1	5902623	5904514	1892
1	5927999	5939284	11286
1	5939307	5943771	4465
1	5961228	5962274	1047
1	5962292	5962712	421
1	5970484	5973638	3155
1	5974545	5977102	2558
1	6014659	6016270	1612
1	6023437	6026224	2788
1	6072785	6074614	1830
1	6083620	6085564	1945
1	6085699	6088294	2596
1	6089212	6091669	2458
1	6101790	6109312	7523
1	6109406	6112894	3489
1	6119933	6121160	1228
1	6123772	6125018	1247
1	6153004	6154360	1357
1	6174202	6175054	853
1	6186522	6188791	2270
1	6195984	6197337	1354
1	6201356	6203714	2359
1	6215569	6218104	2536
1	6224079	6225298	1220
1	6233020	6234362	1343
1	6243438	6244822	1385
1	6263551	6263645	95
1	6264203	6265107	905
1	6265798	6267450	1653
1	6306032	6307430	1399
1	6371867	6374935	3069
1	6388086	6389659	1574
1	6518572	6519783	1212
1	6528406	6530655	2250
1	6530754	6531121	368
1	6537154	6539788	2635
1	6542700	6544231	1532
1	6545446	6549193	3748
1	6552059	6553693	1635
1	6586974	6588881	1908
1	6591772	6596219	4448
1	6601018	6604619	3602
1	6608239	6609472	1234
1	6611748	6614737	2990
1	6636097	6637542	1446
1	6647019	6648560	1542
1	6659399	6661136	1738
1	6710584	6711938	1355
1	6737214	6739221	2008
1	6844729	6848991	4263
1	6949689	6952892	3204
1	6958028	6959267	1240
1	7019905	7021815	1911
1	7022083	7029795	7713
1	7083319	7085019	1701
1	7086026	7087855	1830
1	7090848	7092096	1249
1	7133699	7134924	1226
1	7136769	7138019	1251
1	7145542	7147290	1749
1	7151233	7152457	1225
1	7166439	7167655	1217
1	7169704	7171341	1638
1	7171537	7174033	2497
1	7175885	7177866	1982
1	7178399	7179576	1178
1	7179600	7179770	171
1	7179866	7182035	2170
1	7208300	7213124	4825
1	7226009	7227539	1531
1	7233799	7235386	1588
1	7237052	7237846	795
1	7237988	7240605	2618
1	7241910	7244877	2968
1	7245290	7247486	2197
1	7271474	7273627	2154
1	7320622	7321828	1207
1	7345155	7346914	1760
1	7357660	7358979	1320
1	7374035	7375901	1867
1	7442097	7444549	2453
1	7522000	7523603	1604
1	7554995	7556533	1539
1	7565930	7567186	1257
1	7568133	7570600	2468
1	7594195	7595456	1262
1	7596456	7598323	1868
1	7598483	7600844	2362
1	7669220	7669744	525
1	7677242	7678996	1755
1	7680261	7683058	2798
1	7683422	7684851	1430
1	7687870	7689926	2057
1	7695570	7697105	1536
1	7728645	7730193	1549
1	7747543	7748804	1262
1	7853158	7854531	1374
1	7869153	7870439	1287
1	7885191	7886668	1478
1	7886811	7887180	370
1	7888607	7890437	1831
1	7919412	7921913	2502
1	7923407	7925352	1946
1	7926528	7930110	3583
1	7933016	7934865	1850
1	7944212	7945866	1655
1	7947576	7948942	1367
1	7953300	7955892	2593
1	7961750	7963587	1838
1	7965053	7966407	1355
1	8001997	8003196	1200
1	8003542	8006394	2853
1	8039478	8041180	1703
1	8043942	8045400	1459
1	8049782	8053626	3845
1	8060674	8062519	1846
1	8142293	8143619	1327
1	8157591	8158809	1219
1	8168367	8175668	7302
1	8317005	8319039	2035
1	8409921	8411644	1724
1	8417569	8419133	1565
1	8440612	8442684	2073
1	8464210	8466827	2618
1	8481861	8483252	1392
1	8492137	8493468	1332
1	8501352	8504192	2841
1	8526132	8527418	1287
1	8528664	8530211	1548
1	8544777	8546275	1499
1	8593339	8594620	1282
1	8624942	8626938	1997
1	8707420	8710180	2761
1	8710297	8711905	1609
1	8712470	8715441	2972
1	8724875	8727071	2197
1	8900253	8901950	1698
1	8918922	8920971	2050
1	8927417	8929141	1725
1	8929317	8930635	1319
1	8979688	8982685	2998
1	8996083	8998308	2226
1	9076081	9079836	3756
1	9110391	9111629	1239
1	9128200	9132836	4637
1	9133315	9136104	2790
1	9140228	9148482	8255
1	9148961	9150898	1938
1	9193138	9194564	1427
1	9196253	9197630	1378
1	9197754	9197810	57
1	9199547	9203230	3684
1	9203388	9205711	2324
1	9233124	9235805	2682
1	9243550	9245089	1540
1	9257497	9258759	1263
1	9274150	9275352	1203
1	9278700	9280037	1338
1	9323262	9325119	1858
1	9391551	9395108	3558
1	9412296	9414036	1741
1	9417374	9418935	1562
1	9419047	9421297	2251
1	9421484	9422787	1304
1	9422869	9422892	24
1	9433103	9436265	3163
1	9437536	9439063	1528
1	9452252	9454199	1948
1	9465584	9468203	2620
1	9469599	9472941	3343
1	9479801	9481180	1380
1	9519524	9520734	1211
1	9530307	9532409	2103
1	9539103	9540437	1335
1	9547983	9550136	2154
1	9550542	9552306	1765
1	9570609	9573454	2846
1	9576232	9583717	7486
1	9592061	9597873	5813
1	9598736	9599975	1240
1	9605037	9606362	1326
1	9672063	9674301	2239
1	9676086	9677987	1902
1	9781594	9782758	1165
1	9848700	9850029	1330
1	9882290	9883780	1491
1	9893709	9895238	1530
1	9898368	9899682	1315
1	9919992	9921366	1375
1	9937927	9939478	1552
1	9950494	9951021	528
1	9951046	9951971	926
1	9951975	9953430	1456
1	9954490	9957062	2573
1	9957863	9957868	6
1	9957883	9973274	15392
1	9991606	9993066	1461
1	10014804	10016717	1914
1	10134928	10136499	1572
1	10148988	10151305	2318
1	10151609	10153168	1560
1	10159515	10161878	2364
1	10182590	10184821	2232
1	10239213	10240654	1442
1	10255934	10257213	1280
1	10294511	10295902	1392
1	10297482	10298976	1495
1	10329008	10331382	2375
1	10333038	10333267	230
1	10333516	10343638	10123
1	10343774	10350179	6406
1	10351166	10354316	3151
1	10357025	10363535	6511
1	10363890	10365480	1591
1	10365578	10368909	3332
1	10369435	10369620	186
1	10369659	10372692	3034
1	10392459	10394514	2056
1	10405199	10407368	2170
1	10410998	10414090	3093
1	10414213	10415487	1275
1	10453550	10455003	1454
1	10486299	10487668	1370
1	10497633	10498948	1316
1	10535155	10536707	1553
1	10565669	10566870	1202
1	10567046	10568496	1451
1	10583752	10584339	588
1	10584341	10588082	3742
1	10590858	10594385	3528
1	10594827	10600108	5282
1	10610227	10611700	1474
1	10655421	10661046	5626
1	10673157	10674813	1657
1	10682759	10684691	1933
1	10695623	10696995	1373
1	10712894	10714644	1751
1	10714910	10718445	3536
1	10744157	10744981	825
1	10744987	10745884	898
1	10763013	10764447	1435
1	10764512	10768772	4261
1	10841687	10843251	1565
1	10846262	10849414	3153
1	10857391	10858666	1276
1	10881405	10882726	1322
1	10905874	10908711	2838
1	10913468	10916949	3482
1	10955193	10957404	2212
1	10959191	10961398	2208
1	10987940	10989196	1257
1	11015638	11017097	1460
1	11079899	11083375	3477
1	11096091	11098115	2025
1	11098375	11100170	1796
1	11106191	11108682	2492
1	11162332	11164323	1992
1	11389022	11395939	6918
1	11396250	11400722	4473
1	11409067	11414782	5716
1	11417942	11419329	1388
1	11422481	11424268	1788
1	11505556	11509212	3657
1	11509690	11518263	8574
1	11567346	11568880	1535
1	11579483	11583973	4491
1	11584600	11586643	2044
1	11611917	11614852	2936
1	11615290	11617069	1780
1	11620495	11632758	12264
1	11662903	11665307	2405
1	11665810	11667470	1661
1	11672000	11674094	2095
1	11677897	11679265	1369
1	11701136	11702532	1397
1	11702914	11704113	1200
1	11713857	11723300	9444
1	11744112	11745763	1652
1	11747423	11749419	1997
1	11749426	11751384	1959
1	11753643	11756276	2634
1	11757789	11759135	1347
1	11759730	11762669	2940
1	11763485	11765504	2020
1	11770220	11772605	2386
1	11797016	11798481	1466
1	11803267	11805790	2524
1	11806726	11808483	1758
1	11832222	11833839	1618
1	11852474	11855200	2727
1	11860135	11862519	2385
1	11866922	11868807	1886
1	11873983	11876937	2955
1	11889584	11891627	2044
1	11918123	11920260	2138
1	11946326	11947939	1614
1	11988242	11989916	1675
1	11997711	12000676	2966
1	12027445	12029449	2005
1	12130614	12131889	1276
1	12228638	12229867	1230
1	12239073	12240358	1286
1	12241131	12242829	1699
1	12245162	12247511	2350
1	12252333	12254569	2237
1	12257773	12259520	1748
1	12295032	12296282	1251
1	12310368	12311711	1344
1	12316579	12317897	1319
1	12324203	12327244	3042
1	12344611	12347340	2730
1	12352542	12355131	2590
1	12381035	12382467	1433
1	12399432	12401408	1977
1	12401565	12404712	3148
1	12454606	12456215	1610
1	12487183	12488191	1009
1	12650362	12651127	766
1	12670804	12672744	1941
1	12680073	12681639	1567
1	12704480	12705288	809
1	12705314	12705865	552
1	12759701	12760222	522
1	12760401	12761898	1498
1	12778832	12783972	5141
1	12924119	12924119	1
1	12924276	12926666	2391
1	12936361	12939795	3435
1	12972204	12973121	918
1	12995125	12996998	1874
1	13006178	13007426	1249
1	13062994	13064702	1709
1	13088097	13089337	1241
1	13206002	13206350	349
1	13207945	13210724	2780
1	13231249	13232582	1334
1	13297575	13298853	1279
1	13303794	13305502	1709
1	13311840	13314444	2605
1	13360531	13362626	2096
1	13377829	13379836	2008
1	13406052	13408478	2427
1	13409890	13411509	1620
1	13578454	13580080	1627
1	13583376	13584720	1345
1	13654817	13656186	1370
1	13656203	13658088	1886
1	13659476	13660712	1237
1	13666039	13667703	1665
1	13677165	13678366	1202
1	13717394	13717877	484
1	13718496	13719887	1392
1	13758902	13761030	2129
1	13786514	13787737	1224
1	13814727	13817224	2498
1	13817308	13817764	457
1	13818936	13821380	2445
1	13831704	13833666	1963
1	13887550	13888813	1264
1	13910760	13912672	1913
1	13943638	13945020	1383
1	13945318	13947412	2095
1	13950325	13951185	861
1	13959358	13960985	1628
1	14193180	14195211	2032
1	14238828	14241218	2391
1	14252621	14254706	2086
1	14255762	14264064	8303
1	14265835	14315298	49464
1	14315700	14364293	48594
1	14427861	14441356	13496
1	14441960	14459647	17688
1	14513277	14516091	2815
1	14524843	14525936	1094
1	14535903	14545673	9771
1	14634781	14636186	1406
1	14654111	14655879	1769
1	14659203	14661118	1916
1	14673445	14679145	5701
1	14689341	14696377	7037
1	14704322	14705627	1306
1	14732433	14733871	1439
1	14774364	14775808	1445
1	14776917	14779903	2987
1	14780128	14783169	3042
1	14789865	14791167	1303
1	14799635	14800769	1135
1	14800893	14801042	150
1	14803849	14804882	1034
1	14805113	14805885	773
1	14805956	14809603	3648
1	14811746	14817521	5776
1	14852812	14856672	3861
1	14861732	14863206	1475
1	14868724	14870284	1561
1	14881330	14882686	1357
1	14882991	14885021	2031
1	14890710	14891999	1290
1	14900545	14901938	1394
1	14902009	14904177	2169
1	14908078	14911280	3203
1	14922205	14927214	5010
1	14956558	14957931	1374
1	14963253	14964379	1127
1	14964623	14965473	851
1	14966315	14968581	2267
1	14979407	14982890	3484
1	14986582	14988160	1579
1	14990447	14992973	2527
1	14995808	14997028	1221
1	14998036	15000912	2877
1	15003914	15004894	981
1	15006002	15007897	1896
1	15014968	15020233	5266
1	15026301	15028700	2400
1	15028924	15030572	1649
1	15038430	15040109	1680
1	15040962	15044256	3295
1	15051501	15052664	1164
1	15052684	15053388	705
1	15058489	15058752	264
1	15059121	15059908	788
1	15063765	15065028	1264
1	15090475	15091867	1393
1	15109811	15111520	1710
1	15112545	15115354	2810
1	15118090	15118681	592
1	15143467	15144744	1278
1	15145336	15146667	1332
1	15155594	15157611	2018
1	15164239	15167216	2978
1	15168170	15169559	1390
1	15182081	15183696	1616
1	15185037	15186500	1464
1	15201065	15202904	1840
1	15233095	15234711	1617
1	15242175	15244568	2394
1	15275793	15277091	1299
1	15289236	15291087	1852
1	15297463	15299059	1597
1	15299127	15299746	620
1	15308765	15311002	2238
1	15321609	15322034	426
1	15322115	15323500	1386
1	15330152	15333807	3656
1	15344665	15346433	1769
1	15359184	15359923	740
1	15359964	15360552	589
1	15364805	15367089	2285
1	15375576	15376949	1374
1	15378728	15379975	1248
1	15384845	15387598	2754
1	15398410	15399792	1383
1	15408693	15413724	5032
1	15417986	15420235	2250
1	15447340	15448778	1439
1	15448890	15448908	19
1	15448940	15448975	36
1	15461234	15462592	1359
1	15462701	15465633	2933
1	15472960	15474469	1510
1	15478491	15480054	1564
1	15504406	15513953	9548
1	15524272	15525603	1332
1	15563131	15564477	1347
1	15635221	15637616	2396
1	15651183	15660913	9731
1	15662248	15664067	1820
1	15674582	15675806	1225
1	15685119	15686588	1470
1	15696195	15697488	1294
1	15714390	15716192	1803
1	15730362	15733643	3282
1	15742953	15744303	1351
1	15751202	15753322	2121
1	15776470	15778643	2174
1	15786522	15787021	500
1	15795755	15796974	1220
1	15810410	15812798	2389
1	15839032	15840773	1742
1	15866152	15911804	45653
1	15924713	15926164	1452
1	15936328	15939043	2716
1	15954670	15956133	1464
1	15977258	15977929	672
1	15978118	15980101	1984
1	15988593	15991601	3009
1	16036487	16038240	1754
1	16076735	16078959	2225
1	16102828	16105772	2945
1	16111879	16113204	1326
1	16128602	16129881	1280
1	16147346	16149574	2229
1	16156092	16157701	1610
1	16187406	16188745	1340
1	16188962	16198820	9859
1	16259266	16261767	2502
1	16271576	16274396	2821
1	16308193	16309748	1556
1	16321350	16323950	2601
1	16357292	16358753	1462
1	16359287	16361110	1824
1	16390122	16391507	1386
1	16411315	16415000	3686
1	16415144	16416576	1433
1	16425608	16427418	1811
1	16434824	16438115	3292
1	16438138	16439487	1350
1	16725284	16729799	4516
1	16770161	16773434	3274
1	16787371	16788597	1227
1	16969222	16970675	1454
1	16993728	16995463	1736
1	17004673	17007778	3106
1	17011367	17013001	1635
1	17021139	17021155	17
1	17025809	17029200	3392
1	17080640	17083242	2603
1	17085490	17086708	1219
1	17245713	17246570	858
1	17246979	17247686	708
1	17248928	17250567	1640
1	17267292	17270407	3116
1	17355307	17356263	957
1	17356371	17357858	1488
1	17358197	17360895	2699
1	17382629	17384041	1413
1	17393287	17395319	2033
1	17439963	17440529	567
1	17440966	17442492	1527
1	17442973	17448483	5511
1	17449603	17452729	3127
1	17457172	17459084	1913
1	17460224	17461762	1539
1	17464122	17467196	3075
1	17490802	17492034	1233
1	17496926	17499368	2443
1	17517974	17519313	1340
1	17521356	17523808	2453
1	17538078	17541721	3644
1	17559161	17560647	1487
1	17568582	17571471	2890
1	17616982	17618417	1436
1	17658268	17660882	2615
1	17664033	17668663	4631
1	17684840	17688544	3705
1	17692559	17694851	2293
1	17747382	17749897	2516
1	17799816	17801933	2118
1	17823081	17824351	1271
1	17842821	17845397	2577
1	17858340	17858383	44
1	17858570	17860963	2394
1	17869069	17870333	1265
1	17883734	17885337	1604
1	17890120	17892017	1898
1	17892636	17894023	1388
1	17902134	17904051	1918
1	17904123	17905608	1486
1	17906890	17908422	1533
1	17922763	17923964	1202
1	17930649	17932162	1514
1	17932410	17935030	2621
1	17935100	17935815	716
1	17957409	17959842	2434
1	17961836	17967424	5589
1	17967969	17971338	3370
1	17981147	17982787	1641
1	17989025	17990175	1151
1	17991005	17992585	1581
1	18008500	18011619	3120
1	18037491	18039353	1863
1	18041191	18042867	1677
1	18062135	18063411	1277
1	18063669	18065104	1436
1	18076006	18077418	1413
1	18079270	18081003	1734
1	18082690	18084639	1950
1	18085069	18088951	3883
1	18117008	18126871	9864
1	18130995	18132274	1280
1	18146920	18148245	1326
1	18148635	18151981	3347
1	18171239	18172738	1500
1	18185039	18186488	1450
1	18188063	18188904	842
1	18220539	18222431	1893
1	18226495	18227695	1201
1	18251916	18253133	1218
1	18258625	18260460	1836
1	18302563	18303781	1219
1	18366709	18370260	3552
1	18383765	18385215	1451
1	18388333	18390744	2412
1	18418745	18419820	1076
1	18446827	18450379	3553
1	18450697	18452473	1777
1	18452517	18454022	1506
1	18459084	18460469	1386
1	18550350	18553403	3054
1	18670913	18674043	3131
1	18805434	18812174	6741
1	18818472	18828329	9858
1	18835068	18836482	1415
1	18846708	18849861	3154
1	18878884	18879790	907
1	18977447	18978817	1371
1	18980870	18983393	2524
1	19703379	19704950	1572
1	19740834	19744831	3998
1	19805122	19807236	2115
1	19808417	19809622	1206
1	19834061	19835541	1481
1	19855149	19856824	1676
1	19868974	19873177	4204
1	19879633	19881159	1527
1	19888063	19889506	1444
1	19890801	19892197	1397
1	19920067	19922597	2531
1	19948341	19950163	1823
1	19950909	19953363	2455
1	19978368	19979838	1471
1	19985108	19987548	2441
1	20033958	20047509	13552
1	20068805	20071577	2773
1	20083372	20086667	3296
1	20239023	20242727	3705
1	20242782	20246767	3986
1	20246883	20248724	1842
1	20254243	20256857	2615
1	20259088	20261732	2645
1	20270931	20272536	1606
1	20273458	20275103	1646
1	20286176	20288184	2009
1	20289009	20291944	2936
1	20327170	20328123	954
1	20548485	20549717	1233
1	20560391	20561767	1377
1	20561823	20564310	2488
1	20577972	20581162	3191
1	20612510	20614029	1520
1	20624810	20630325	5516
1	20639305	20640280	976
1	20640358	20642393	2036
1	20659138	20660960	1823
1	20665982	20668539	2558
1	20674103	20675459	1357
1	20691745	20693209	1465
1	20703773	20705858	2086
1	20764960	20767555	2596
1	20787768	20789883	2116
1	20808333	20810313	1981
1	20821762	20823162	1401
1	20887894	20889269	1376
1	20948865	20949035	171
1	20956433	20958374	1942
1	20973068	20974707	1640
1	20983491	20984876	1386
1	20996049	20997538	1490
1	21013426	21015834	2409
1	21031712	21034307	2596
1	21037054	21039786	2733
1	21040172	21041679	1508
1	21067173	21069069	1897
1	21073896	21075345	1450
1	21075347	21078644	3298
1	21078665	21086739	8075
1	21101799	21103410	1612
1	21104701	21106964	2264
1	21147101	21149640	2540
1	21156180	21158321	2142
1	21160091	21161461	1371
1	21195838	21197317	1480
1	21203778	21205385	1608
1	21205504	21207917	2414
1	21210623	21212190	1568
1	21213783	21216422	2640
1	21216518	21217954	1437
1	21223880	21227683	3804
1	21434125	21438581	4457
1	21626748	21630651	3904
1	21639210	21640784	1575
1	21657774	21659465	1692
1	21680379	21681801	1423
1	21682005	21682796	792
1	21732010	21733348	1339
1	21737137	21739356	2220
1	21788372	21792582	4211
1	21794158	21798014	3857
1	21810790	21820694	9905
1	21840377	21846767	6391
1	21869328	21870670	1343
1	21966817	21972854	6038
1	21975120	21976561	1442
1	22003188	22005020	1833
1	22005294	22006748	1455
1	22029973	22031915	1943
1	22091732	22092988	1257
1	22101900	22103176	1277
1	22601198	22605153	3956
1	22639198	22649150	9953
1	23463406	23473663	10258
1	23770172	23782429	12258
1	25385861	25389351	3491
1	25433184	25440665	7482
1	25564501	25570256	5756
1	25573162	25582128	8967
1	25585746	25587308	1563
1	25640167	25642275	2109
1	25674793	25676338	1546
1	25678079	25679965	1887
1	25680106	25682649	2544
1	25682694	25683804	1111
1	25683933	25686266	2334
1	25690276	25695612	5337
1	25716906	25726722	9817
1	25727700	25729955	2256
1	25731801	25733577	1777
1	25797315	25798646	1332
1	25798781	25800675	1895
1	25800778	25803912	3135
1	25818650	25820600	1951
1	25849610	25851234	1625
1	25862556	25864440	1885
1	25901359	25904631	3273
1	25910635	25912124	1490
1	25914639	25916333	1695
1	25921669	25925339	3671
1	25949437	25950880	1444
1	25954437	25967955	13519
1	25989088	26011565	22478
1	26027409	26028807	1399
1	26050093	26051388	1296
1	26065091	26066558	1468
1	26081177	26082814	1638
1	26107618	26108850	1233
1	26141287	26142747	1461
1	26154355	26156715	2361
1	26156819	26157052	234
1	26163603	26165804	2202
1	26165939	26168349	2411
1	26168407	26172180	3774
1	26218859	26224156	5298
1	26240218	26241848	1631
1	26241877	26244334	2458
1	26244359	26245946	1588
1	26276740	26278311	1572
1	26289845	26291145	1301
1	26294532	26295841	1310
1	26303086	26304801	1716
1	26315830	26317445	1616
1	26330828	26334188	3361
1	26344509	26348635	4127
1	26352513	26353890	1378
1	26632392	26635524	3133
1	26653181	26656091	2911
1	26673028	26674657	1630
1	26697005	26699762	2758
1	26700001	26701577	1577
1	26702190	26703409	1220
1	26707954	26709339	1386
1	26749029	26750473	1445
1	26757575	26758794	1220
1	26765198	26767174	1977
1	26780370	26784109	3740
1	26788751	26790388	1638
1	26833659	26835538	1880
1	26835571	26835572	2
1	26846778	26848164	1387
1	26854820	26856129	1310
1	26857469	26858747	1279
1	26859457	26860677	1221
1	26873419	26885049	11631
1	26893210	26897933	4724
1	26898952	26902629	3678
1	26903898	26905423	1526
1	26905717	26907470	1754
1	26921711	26923734	2024
1	26927222	26931379	4158
1	26940066	26943153	3088
1	26966839	26967548	710
1	26986480	26988031	1552
1	26992111	26992378	268
1	26992405	26994024	1620
1	26997501	26999472	1972
1	27005857	27019183	13327
1	27019735	27052974	33240
1	27053432	27076068	22637
1	27077575	27077874	300
1	27082695	27084727	2033
1	27087218	27089180	1963
1	27091646	27093577	1932
1	27106477	27108794	2318
1	27116343	27117662	1320
1	27121585	27123176	1592
1	27124513	27132033	7521
1	27145042	27145839	798
1	27153079	27154748	1670
1	27165200	27165498	299
1	27165564	27167180	1617
1	27184625	27184653	29
1	27184709	27186378	1670
1	27189097	27191946	2850
1	27200990	27203120	2131
1	27203208	27203768	561
1	27254325	27256487	2163
1	27274185	27275933	1749
1	27278234	27281475	3242
1	27286989	27288865	1877
1	27296720	27298607	1888
1	27308818	27311768	2951
1	27311776	27313366	1591
1	27338953	27340532	1580
1	27353304	27354572	1269
1	27361078	27362300	1223
1	27399026	27401411	2386
1	27401480	27402945	1466
1	27499933	27504576	4644
1	27534749	27536590	1842
1	27545950	27548523	2574
1	27556455	27561783	5329
1	27566407	27568879	2473
1	27572553	27574675	2123
1	27574690	27576161	1472
1	27608821	27611638	2818
1	27621469	27623841	2373
1	27628108	27629586	1479
1	27642164	27644882	2719
1	27651009	27654987	3979
1	27660484	27662856	2373
1	27668069	27670259	2191
1	27678024	27679449	1426
1	27693324	27694645	1322
1	27708398	27710191	1794
1	27713299	27714929	1631
1	27725412	27726725	1314
1	27738992	27740766	1775
1	27741864	27744481	2618
1	27744607	27746002	1396
1	27795658	27796304	647
1	27796520	27796917	398
1	27807858	27808435	578
1	27809556	27809744	189
1	27822575	27825450	2876
1	27830529	27832195	1667
1	27833862	27835207	1346
1	27835594	27837310	1717
1	27839648	27842424	2777
1	27843741	27848900	5160
1	28423918	28450325	26408
1	28682908	28703014	20107
1	28951722	28955123	3402
1	28963703	28966485	2783
1	29146578	29147075	498
1	29147167	29148879	1713
1	29155026	29157517	2492
1	29167335	29168658	1324
1	29176245	29178246	2002
1	29179668	29182135	2468
1	29182571	29183963	1393
1	29190172	29192353	2182
1	29193477	29198466	4990
1	29216784	29221332	4549
1	29226565	29228376	1812
1	29233915	29235514	1600
1	29255459	29257355	1897
1	29296910	29308515	11606
1	29314054	29315661	1608
1	29315848	29317572	1725
1	29332252	29334128	1877
1	29335613	29337201	1589
1	29523555	29524865	1311
1	29545719	29547563	1845
1	29548187	29549866	1680
1	29568082	29569454	1373
1	29570033	29571376	1344
1	29576678	29577945	1268
1	29583608	29583881	274
1	29583906	29585688	1783
1	29668008	29669658	1651
1	29679162	29680524	1363
1	29682400	29684547	2148
1	29685865	29687754	1890
1	29700880	29702321	1442
1	29714570	29717444	2875
1	29719155	29722294	3140
1	29724866	29726152	1287
1	29726993	29729110	2118
1	29738704	29741170	2467
1	29741386	29741507	122
1	29786993	29788776	1784
1	29804825	29807548	2724
1	29819739	29820919	1181
1	29829525	29831059	1535
1	29841718	29843320	1603
1	29844729	29846194	1466
1	29852172	29854508	2337
1	29867102	29868715	1614
1	29952050	29953472	1423
1	29957539	29960749	3211
1	29988411	29990212	1802
1	29991824	29993257	1434
1	30000111	30001798	1688
1	30002525	30004559	2035
1	30028396	30030124	1729
1	30043621	30044883	1263
1	30055480	30057271	1792
1	30068604	30070572	1969
1	30072467	30074196	1730
1	30094920	30101771	6852
1	30105352	30109061	3710
1	30109558	30111449	1892
1	30117355	30138433	21079
1	30150215	30151487	1273
1	30164791	30167081	2291
1	30202472	30203725	1254
1	30214722	30216094	1373
1	30257407	30259582	2176
1	30260918	30282117	21200
1	30307974	30311954	3981
1	30314302	30317457	3156
1	30318228	30325851	7624
1	30332097	30335120	3024
1	30341265	30343674	2410
1	30350011	30389797	39787
1	30401492	30403119	1628
1	30403474	30441160	37687
1	30441323	30462657	21335
1	30481463	30486425	4963
1	30489246	30490703	1458
1	30490759	30494235	3477
1	30495459	30497429	1971
1	30497784	30500632	2849
1	30500898	30503260	2363
1	30504016	30506861	2846
1	30508116	30509615	1500
1	30513062	30514344	1283
1	30535693	30539783	4091
1	30558094	30560536	2443
1	30561574	30563672	2099
1	30567896	30569959	2064
1	30613774	30619225	5452
1	30837268	30838797	1530
1	30929814	30933891	4078
1	30936271	30941512	5242
1	31023674	31025333	1660
1	31027305	31028765	1461
1	31079531	31081144	1614
1	31088218	31089647	1430
1	31176805	31178550	1746
1	31196694	31198471	1778
1	31204820	31206089	1270
1	31206128	31207450	1323
1	31211054	31212593	1540
1	31264104	31265455	1352
1	31345980	31348372	2393
1	31353200	31354761	1562
1	31355593	31359998	4406
1	31377286	31382145	4860
1	31390352	31419870	29519
1	31424034	31427832	3799
1	31495718	31497895	2178
1	31557187	31558623	1437
1	31589746	31598311	8566
1	31623598	31625616	2019
1	31628215	31630624	2410
1	31631117	31632512	1396
1	31634643	31639600	4958
1	31652629	31657430	4802
1	31665787	31667732	1946
1	31673208	31687530	14323
1	31698513	31736680	38168
1	31739267	31740899	1633
1	31761516	31762758	1243
1	31767130	31769727	2598
1	31770499	31771726	1228
1	31792324	31797390	5067
1	31811394	31825813	14420
1	31826440	31829060	2621
1	31832117	31835509	3393
1	31837800	31897769	59970
1	31961309	31963584	2276
1	31968963	31970756	1794
1	31990486	32002405	11920
1	32012665	32014070	1406
1	32026854	32028059	1206
1	32036928	32038817	1890
1	32050583	32052090	1508
1	32055597	32058149	2553
1	32065939	32068912	2974
1	32072868	32074169	1302
1	32077711	32081947	4237
1	32083562	32085080	1519
1	32085493	32087354	1862
1	32096362	32097568	1207
1	32101027	32103797	2771
1	32110868	32112565	1698
1	32113052	32115012	1961
1	32117212	32121187	3976
1	32121808	32123065	1258
1	32129073	32132483	3411
1	32135626	32248339	112714
1	32248420	32287855	39436
1	32287972	32304922	16951
1	32305046	32334243	29198
1	32334607	32337975	3369
1	32338009	32357745	19737
1	32357752	32372012	14261
1	32377985	32382781	4797
1	32383133	32387821	4689
1	32402947	32405659	2713
1	32422656	32429843	7188
1	32450665	32454479	3815
1	32534124	32537267	3144
1	32553772	32556190	2419
1	32559008	32560537	1530
1	32560990	32563284	2295
1	32563510	32571901	8392
1	32575276	32577421	2146
1	32609661	32612729	3069
1	32625449	32626671	1223
1	32649474	32650793	1320
1	32657175	32658645	1471
1	32659024	32660455	1432
1	32671550	32674219	2670
1	32683711	32686483	2773
1	32689621	32691231	1611
1	32695715	32697355	1641
1	32705052	32706390	1339
1	32715813	32717479	1667
1	32726999	32728516	1518
1	32731970	32733617	1648
1	32736051	32744683	8633
1	32749592	32750843	1252
1	32773918	32775313	1396
1	32797850	32806200	8351
1	32829901	32831314	1414
1	32837231	32838470	1240
1	32839058	32840399	1342
1	32850432	32851696	1265
1	32851822	32857874	6053
1	32871954	32873952	1999
1	32879323	32880975	1653
1	32881050	32887895	6846
1	32887927	32889638	1712
1	32893070	32895293	2224
1	32901592	32904014	2423
1	32904801	32907912	3112
1	32910410	32915636	5227
1	32921269	32924398	3130
1	32926063	32928112	2050
1	32931966	32933293	1328
1	32934442	32936001	1560
1	32938004	32939440	1437
1	32943009	32945420	2412
1	32976697	32978040	1344
1	32989727	32991795	2069
1	33009924	33017118	7195
1	33020029	33021797	1769
1	33025282	33026885	1604
1	33027932	33030425	2494
1	33034854	33037542	2689
1	33040584	33041889	1306
1	33094085	33095396	1312
1	33114702	33120552	5851
1	33122708	33133635	10928
1	33134523	33136929	2407
1	33156331	33158012	1682
1	33173550	33178553	5004
1	33181343	33183799	2457
1	33183887	33186796	2910
1	33234238	33236862	2625
1	33244383	33246389	2007
1	33260428	33266625	6198
1	33277750	33286657	8908
1	33298342	33299111	770
1	33339673	33341228	1556
1	33343736	33351012	7277
1	33354762	33358525	3764
1	33364958	33374262	9305
1	33375605	33378304	2700
1	33384407	33388401	3995
1	33389680	33390933	1254
1	33391034	33393684	2651
1	33405879	33406944	1066
1	33406946	33409751	2806
1	33417280	33418508	1229
1	33430447	33434038	3592
1	33437251	33440932	3682
1	33441691	33442917	1227
1	33443319	33445355	2037
1	33462216	33463532	1317
1	33466135	33470758	4624
1	33513365	33514644	1280
1	33519960	33521433	1474
1	33532344	33533905	1562
1	33542716	33545456	2741
1	33554117	33555634	1518
1	33562664	33564685	2022
1	33573959	33578880	4922
1	33579271	33581661	2391
1	33594984	33596426	1443
1	33601447	33602612	1166
1	33606255	33608266	2012
1	33608805	33610759	1955
1	33623480	33624901	1422
1	33628855	33630502	1648
1	33633280	33635486	2207
1	33648198	33649887	1690
1	33654609	33657581	2973
1	33668798	33675105	6308
1	33682904	33684622	1719
1	33688735	33690631	1897
1	33693082	33695788	2707
1	33695800	33697724	1925
1	33712743	33721516	8774
1	33726676	33727910	1235
1	33756195	33760752	4558
1	33778110	33781112	3003
1	33786718	33788121	1404
1	33815812	33818530	2719
1	33830010	33830618	609
1	33833447	33834923	1477
1	33835380	33836586	1207
1	33928597	33944894	16298
1	33950702	33952615	1914
1	33958985	33976145	17161
1	34056659	34285473	228815
1	34286862	34306056	19195
1	34342152	34351214	9063
1	34449470	34460125	10656
1	34461495	34469702	8208
1	34470954	34479888	8935
1	34480168	34543098	62931
1	34605898	34616263	10366
1	34723270	34725108	1839
1	34731933	34733725	1793
1	34734191	34735417	1227
1	34741130	34743648	2519
1	34747308	34751511	4204
1	34816019	34816836	818
1	34861960	34863582	1623
1	34898427	34899161	735
1	35051651	35064463	12813
1	35064789	35075617	10829
1	35199553	35199658	106
1	35199875	35203138	3264
1	35212192	35218360	6169
1	35246733	35259700	12968
1	35266080	35301279	35200
1	35301603	35312918	11316
1	35324579	35326254	1676
1	35411212	35417125	5914
1	35541016	35543087	2072
1	35544506	35545934	1429
1	35556216	35557820	1605
1	35559297	35562156	2860
1	35569915	35572365	2451
1	35597132	35601277	4146
1	35602398	35606969	4572
1	35608562	35649556	40995
1	35652037	35657688	5652
1	35668399	35686094	17696
1	35686306	35697010	10705
1	35710850	35712152	1303
1	35717124	35720331	3208
1	35726885	35732345	5461
1	35732355	35733775	1421
1	35752491	35754784	2294
1	35754827	35756325	1499
1	35795638	35798700	3063
1	35804440	35805843	1404
1	35811307	35817233	5927
1	35817324	35819329	2006
1	35819456	35820739	1284
1	35820754	35826893	6140
1	35830158	35837064	6907
1	35900781	35906894	6114
1	35949557	35979505	29949
1	35980476	36012634	32159
1	36077438	36084613	7176
1	36148106	36153266	5161
1	36157687	36163830	6144
1	36164051	36169805	5755
1	36267954	36274306	6353
1	36336799	36337752	954
1	36489458	36500976	11519
1	36677020	36688965	11946
1	36689567	36695837	6271
1	36791839	36798882	7044
1	36805314	36811238	5925
1	36832931	36835563	2633
1	37056251	37058509	2259
1	37252590	37254367	1778
1	37282138	37284097	1960
1	37367037	37370973	3937
1	37399497	37404043	4547
1	37407646	37408075	430
1	37422078	37424416	2339
1	37429528	37431392	1865
1	37444527	37448438	3912
1	37472515	37478934	6420
1	37592987	37595760	2774
1	37607447	37609239	1793
1	37619332	37623245	3914
1	37632108	37633849	1742
1	37687067	37693255	6189
1	37694861	37696359	1499
1	37751098	37762886	11789
1	37814712	37838643	23932
1	37945277	37948076	2800
1	37996603	38006109	9507
1	38012258	38012920	663
1	38041036	38042522	1487
1	38050503	38084192	33690
1	38141891	38145234	3344
1	38156544	38177630	21087
1	38179317	38202085	22769
1	38203416	38267300	63885
1	38269106	38339899	70794
1	38341485	38350109	8625
1	38352913	38376339	23427
1	38378963	38399165	20203
1	38405627	38436199	30573
1	38437155	38439977	2823
1	38440990	38477063	36074
1	38620143	38624631	4489
1	38710865	38711921	1057
1	38715556	38716794	1239
1	38729719	38733438	3720
1	38733995	38778375	44381
1	38884177	39043884	159708
1	39070443	39137824	67382
1	39139505	39452937	313433
1	39453533	39519437	65905
1	39519622	39623964	104343
1	39624634	39652957	28324
1	39653188	39716315	63128
1	39717547	39756108	38562
1	39778387	39785611	7225
1	39787750	39934702	146953
1	39936004	39978011	42008
1	40099999	40104371	4373
1	40108040	40135991	27952
1	40142727	40147247	4521
1	40296262	40302156	5895
1	40310557	40316362	5806
1	40387378	40403351	15974
1	40469750	40481450	11701
1	40486186	40523452	37267
1	40526744	40859728	332985
1	40859952	40930860	70909
1	40931526	40962175	30650
1	41088916	41090758	1843
1	41091102	41092580	1479
1	41962181	41963516	1336
1	41994980	41995225	246
1	41995972	41998671	2700
1	42000337	42001884	1548
1	42288165	42295151	6987
1	43628540	43631138	2599
1	43635609	43636900	1292
1	43641155	43643478	2324
1	45392143	45393415	1273
1	45403816	45405339	1524
1	45421221	45422596	1376
1	46751681	46755130	3450
1	47984287	47989932	5646
1	48183625	48185252	1628
1	51075663	51077729	2067
1	51186510	51187797	1288
1	51237916	51241563	3648
1	51245359	51247002	1644
1	51264484	51267580	3097
1	51697524	51702397	4874
1	52019481	52025867	6387
1	52282220	52282231	12
1	52283091	52284562	1472
1	52717619	52725185	7567
1	52727050	52728395	1346
1	53035709	53037018	1310
1	53070601	53071234	634
1	53071259	53073443	2185
1	53105506	53106856	1351
1	53106898	53107300	403
1	53107693	53110097	2405
1	53110222	53113369	3148
1	53130109	53132199	2091
1	53135744	53139299	3556
1	53140930	53142482	1553
1	53150155	53152801	2647
1	53167681	53169175	1495
1	53170253	53171575	1323
1	53173769	53176098	2330
1	53176282	53178365	2084
1	53207623	53209644	2022
1	53219245	53220474	1230
1	53259972	53261316	1345
1	53317126	53318867	1742
1	53346859	53349564	2706
1	53354512	53357720	3209
1	53378361	53380439	2079
1	53387928	53390791	2864
1	53398581	53400083	1503
1	53400853	53402276	1424
1	53421356	53426080	4725
1	53427006	53429021	2016
1	53429235	53432520	3286
1	53499813	53501044	1232
1	54352532	54358304	5773
1	54360361	54367876	7516
1	54955902	54957989	2088
1	55001426	55003147	1722
1	55003427	55004884	1458
1	55008462	55010071	1610
1	55010401	55012451	2051
1	55025233	55027023	1791
1	55032424	55034870	2447
1	55036308	55039350	3043
1	55041698	55044195	2498
1	55045229	55050074	4846
1	55052079	55082740	30662
1	55091324	55093255	1932
1	55093302	55096686	3385
1	55253015	55255102	2088
1	55354080	55356657	2578
1	55534881	55542359	7479
1	56298091	56301328	3238
1	56314942	56317796	2855
1	56318761	56322984	4224
1	56418568	56427199	8632
1	57068658	57071101	2444
1	57280296	57283201	2906
1	57288062	57289659	1598
1	57289922	57291622	1701
1	57348172	57350087	1916
1	57637235	57650783	13549
1	58120655	58124324	3670
1	58392396	58533490	141095
1	58594498	58611902	17405
1	58612874	58697716	84843
1	58701407	58701862	456
1	58705429	58993324	287896
1	59090609	59106559	15951
1	59346881	59352875	5995
1	59445944	59447628	1685
1	59494676	59499607	4932
1	59512420	59514604	2185
1	59584605	59589231	4627
1	59652935	59655483	2549
1	59668823	59699644	30822
1	59909357	59911498	2142
1	59917220	59921084	3865
1	59952522	59963669	11148
1	59980562	59982399	1838
1	59995795	60001966	6172
1	60002603	60014229	11627
1	60017679	60042768	25090
1	60061086	60081517	20432
1	60168458	60171701	3244
1	60306880	60307865	986
1	60311257	60313932	2676
1	60591182	60594923	3742
1	60651117	60655070	3954
1	60661930	60671203	9274
1	60726592	60732139	5548
1	60769317	60795197	25881
1	60903300	60911059	7760
1	61024966	61030440	5475
1	61090013	61101597	11585
1	61236801	61239312	2512
1	61282682	61284992	2311
1	61397333	61405322	7990
1	61411057	61419707	8651
1	61463995	61468987	4993
1	61469493	61470274	782
1	61470675	61471728	1054
1	61472446	61477174	4729
1	61576926	61590657	13732
1	61614790	61625319	10530
1	61633527	61648881	15355
1	61988738	62004819	16082
1	62006199	62012942	6744
1	62014935	62030786	15852
1	62034153	62082478	48326
1	62085422	62149910	64489
1	62159524	62190602	31079
1	62191408	62231071	39664
1	62237227	62278073	40847
1	62278366	62289606	11241
1	62290575	62352202	61628
1	62352372	62379383	27012
1	62383072	62491719	108648
1	62492176	62531610	39435
1	62632792	62636785	3994
1	62788876	62791244	2369
1	62927471	62933154	5684
1	62982169	62984552	2384
1	63029581	63031182	1602
1	63049353	63066998	17646
1	63070766	63077240	6475
1	63077660	63086216	8557
1	63160947	63166086	5140
1	63195473	63203290	7818
1	63527664	63537242	9579
1	63549160	63563532	14373
1	63628080	63629804	1725
1	64107549	64110547	2999
1	64131891	64133240	1350
1	64136950	64139884	2935
1	64149307	64152448	3142
1	64178398	64183334	4937
1	64189049	64195142	6094
1	64274997	64277983	2987
1	64672763	64682327	9565
1	64866002	64870044	4043
1	65088785	65094714	5930
1	65095333	65099459	4127
1	65145229	65150028	4800
1	65171665	65175358	3694
1	65183260	65190745	7486
1	65645229	65646389	1161
1	65684945	65700382	15438
1	65777472	65779568	2097
1	65944402	65947511	3110
1	66014021	66020229	6209
1	66448887	66451508	2622
1	68016444	68020015	3572
1	68023802	68028847	5046
1	69355200	69357892	2693
1	70378321	70379729	1409
1	71145305	71148174	2870
1	71748400	71751715	3316
1	73989193	73993450	4258
1	73996392	74000866	4475
1	75490955	75498052	7098
1	75674227	75675609	1383
1	75704504	75715025	10522
1	75891095	75892246	1152
1	75899494	75907684	8191
1	76014564	76028108	13545
1	76948804	76955473	6670
1	78077078	78081791	4714
1	78153093	78160817	7725
1	78738030	78739808	1779
1	78936528	78938337	1810
1	78971067	78973612	2546
1	78973668	78973668	1
1	78973713	78976267	2555
1	78982215	78984354	2140
1	78984468	78986583	2116
1	78987802	78989006	1205
1	78990438	78994258	3821
1	79000476	79003208	2733
1	79967680	79973934	6255
1	80843774	80849257	5484
1	81357165	81361271	4107
1	81490781	81514540	23760
1	81519486	81527812	8327
1	81600999	81621718	20720
1	81679032	81681046	2015
1	81724620	81729372	4753
1	82197219	82205424	8206
1	83799104	83806802	7699
1	84843312	84850010	6699
1	84865420	84878089	12670
1	85030873	85037560	6688
1	86172669	86179128	6460
1	86299072	86304223	5152
1	86304246	86311012	6767
1	87791617	87798408	6792
1	87816361	87833181	16821
1	88094428	88099296	4869
1	88241398	88257079	15682
1	88303578	88320038	16461
1	88518907	88525989	7083
1	88811576	88812490	915
1	89414455	89420183	5729
1	89699466	89710324	10859
1	89746991	89748530	1540
1	90556737	90558982	2246
1	90903358	90905526	2169
1	91861654	91876818	15165
1	92145142	92146364	1223
1	92146372	92147623	1252
1	93173875	93175272	1398
1	93182825	93184165	1341
1	93189145	93190543	1399
1	93197846	93199488	1643
1	93203203	93205475	2273
1	93210846	93213631	2786
1	93213689	93215083	1395
1	93218845	93220466	1622
1	93221142	93222959	1818
1	93232558	93234518	1961
1	93237024	93238988	1965
1	93242840	93244251	1412
1	93273863	93275314	1452
1	93312480	93314607	2128
1	93315031	93316930	1900
1	93326313	93328737	2425
1	93331888	93335377	3490
1	93340237	93341928	1692
1	93343996	93345222	1227
1	93346554	93349490	2937
1	93349509	93349534	26
1	93353598	93353625	28
1	93353639	93358475	4837
1	93358496	93361053	2558
1	93362102	93363986	1885
1	93364288	93367365	3078
1	93367746	93369329	1584
1	93551744	93554219	2476
1	93557028	93558527	1500
1	93575661	93577875	2215
1	93578624	93580197	1574
1	93581903	93584185	2283
1	93584871	93586825	1955
1	93587003	93587909	907
1	93588723	93590081	1359
1	93590614	93592314	1701
1	93597454	93600207	2754
1	93600476	93602062	1587
1	93635752	93637051	1300
1	93641345	93642596	1252
1	94012126	94020973	8848
1	94146389	94157005	10617
1	94444228	94463959	19732
1	95900941	95906496	5556
1	96425188	96429004	3817
1	96442062	96448390	6329
1	96460457	96463942	3486
1	96550895	96557778	6884
1	96767374	96782068	14695
1	96782650	96785706	3057
1	96813911	96830765	16855
1	96874573	96880404	5832
1	96885064	96895746	10683
1	96917242	96919518	2277
1	99459881	99465537	5657
1	99480749	99482006	1258
1	99507227	99507637	411
1	99508329	99511695	3367
1	99523276	99523691	416
1	99549300	99550688	1389
1	99652425	99653742	1318
1	99656215	99661102	4888
1	99775525	99777136	1612
1	99988683	99991065	2383
1	100007536	100007980	445
1	100143011	100187814	44804
1	100188209	100211717	23509
1	100212919	100216465	3547
1	100224345	100225662	1318
1	100302181	100304641	2461
1	100309945	100313823	3879
1	100344760	100347057	2298
1	100352605	100359221	6617
1	100363183	100364762	1580
1	100491440	100522681	31242
1	100747851	100756477	8627
1	100782455	100783985	1531
1	100822282	100837110	14829
1	100838172	100841019	2848
1	100889647	100912694	23048
1	100914996	100975741	60746
1	100976146	100977979	1834
1	100979250	100984401	5152
1	100985161	100991012	5852
1	101027223	101057079	29857
1	101175049	101176925	1877
1	101188618	101197140	8523
1	101212229	101215060	2832
1	101239065	101273806	34742
1	101281172	101284160	2989
1	101313599	101316307	2709
1	101365885	101367276	1392
1	101435759	101436209	451
1	101462781	101466740	3960
1	101687249	101688618	1370
1	101695984	101699287	3304
1	101848602	101849242	641
1	101853763	101856749	2987
1	101868540	101869999	1460
1	101874886	101876562	1677
1	101879210	101883062	3853
1	101889583	101892809	3227
1	101975282	101979721	4440
1	102173047	102173717	671
1	102306794	102314193	7400
1	102331493	102334856	3364
1	102370323	102378621	8299
1	102616680	102628055	11376
1	102694659	102697177	2519
1	103365796	103369189	3394
1	103384244	103385259	1016
1	103484459	103505276	20818
1	103505442	103506008	567
1	103506604	103506819	216
1	103511276	103515191	3916
1	103528475	103530379	1905
1	103530766	103532992	2227
1	103566462	103570487	4026
1	103577705	103583240	5536
1	103621651	103624094	2444
1	104014009	104018672	4664
1	104018853	104019213	361
1	104342528	104346769	4242
1	105496255	105506879	10625
1	105938188	105942876	4689
1	106029007	106031267	2261
1	106034506	106046514	12009
1	107829236	107835226	5991
1	107841692	107845338	3647
1	109671739	109675933	4195
1	109881023	109884896	3874
1	111653098	111658183	5086
1	113544044	113549509	5466
1	113802179	113804253	2075
1	114294419	114309669	15251
1	114497010	114503996	6987
1	114772568	114793636	21069
1	116770424	116776541	6118
1	116849587	116850896	1310
1	116854625	116856639	2015
1	116892361	116894770	2410
1	116912109	116913738	1630
1	116914067	116915699	1633
1	116915905	116917988	2084
1	116918219	116921336	3118
1	116936038	116942691	6654
1	116963025	116964754	1730
1	116969325	116972513	3189
1	116973949	116976255	2307
1	117004180	117006712	2533
1	117013290	117018271	4982
1	117041165	117042499	1335
1	117042967	117044785	1819
1	117046328	117051524	5197
1	117055611	117056886	1276
1	117076356	117078470	2115
1	117175395	117176636	1242
1	117195630	117196945	1316
1	117197130	117198409	1280
1	117198507	117200590	2084
1	117234864	117236064	1201
1	117629712	117633284	3573
1	117719527	117733899	14373
1	117853572	117855150	1579
1	117856529	117859680	3152
1	118556733	118570431	13699
1	119481159	119483663	2505
1	120854075	120865410	11336
1	121176471	121180920	4450
1	121601926	121602247	322
1	122964398	122968715	4318
1	123026912	123028240	1329
1	123292215	123296079	3865
1	123463834	123468507	4674
1	123471347	123477473	6127
1	123782658	123787867	5210
1	125171410	125174060	2651
1	125191813	125195874	4062
1	125196478	125200165	3688
1	126388069	126394857	6789
1	126395671	126397916	2246
1	126410366	126418552	8187
1	127194345	127207967	13623
1	129219028	129224091	5064
1	131247157	131258729	11573
1	131699509	131802825	103317
1	131823305	131841199	17895
1	131841579	131889157	47579
1	131898736	131901700	2965
1	131902719	131927313	24595
1	131927660	131956533	28874
1	131977341	131990509	13169
1	132009762	132034848	25087
1	133779382	133788725	9344
1	136042636	136069364	26729
1	136395570	136404916	9347
1	136455716	136458141	2426
1	137163959	137175018	11060
1	138158197	138193651	35455
1	138930350	138933764	3415
1	138934328	138937651	3324
1	138944508	138954561	10054
1	138968640	138985244	16605
1	139706023	139719360	13338
1	139883705	139891411	7707
1	140341488	140342275	788
1	140343391	140352487	9097
1	140720527	140735066	14540
1	140738160	140743169	5010
1	141020030	141021763	1734
1	141023465	141024836	1372
1	141037906	141040293	2388
1	141241161	141244652	3492
1	141555823	141558526	2704
1	141562957	141569791	6835
1	141575384	141581588	6205
1	141584626	141596288	11663
1	141797225	141800523	3299
1	142541568	142556406	14839
1	143085931	143088590	2660
1	143253300	143270465	17166
1	143628470	143639456	10987
1	143644147	143650631	6485
1	143811434	143818064	6631
1	144004640	144022290	17651
1	144023253	144036014	12762
1	144039513	144064645	25133
1	144069167	144085228	16062
1	144100408	144101272	865
1	144103229	144112553	9325
1	144113323	144140622	27300
1	144141648	144141916	269
1	144142696	144222808	80113
1	144222985	144223507	523
1	144223817	144225950	2134
1	144226189	144232450	6262
1	144232828	144241102	8275
1	144242432	144307106	64675
1	144550610	144563471	12862
1	144566614	144567338	725
1	144579378	144581152	1775
1	144587634	144616595	28962
1	144627863	144634212	6350
1	144694008	144697565	3558
1	144707917	144711539	3623
1	144854100	144869998	15899
1	144877093	144895466	18374
1	144898007	144900105	2099
1	144901005	144906905	5901
1	144908253	144913862	5610
1	145177600	145203930	26331
1	145204158	145218428	14271
1	145497222	145547613	50392
1	145640473	145643772	3300
1	145660432	145663684	3253
1	145753137	145755044	1908
1	145771393	145775540	4148
1	145777824	145779890	2067
1	145873409	145879420	6012
1	145956090	145982923	26834
1	145991204	146026051	34848
1	146083308	146095662	12355
1	146310482	147275715	965234
1	147282023	147370859	88837
1	147375763	147378341	2579
1	147378348	147385819	7472
1	147386621	147501541	114921
1	147503516	147511085	7570
1	147514531	147529942	15412
1	147533839	147695657	161819
1	147696184	147719318	23135
1	147719840	147839573	119734
1	147840229	147842456	2228
1	147843239	147889089	45851
1	147890517	148257756	367240
1	148258617	148822593	563977
1	148824016	148881113	57098
1	148882368	148905554	23187
1	148906857	149134434	227578
1	149136701	149209025	72325
1	149210105	149216227	6123
1	149217538	149595514	377977
1	149595712	149673881	78170
1	149674412	149675093	682
1	149675405	149754460	79056
1	149755351	149787889	32539
1	149788790	149801772	12983
[truncated: 48,670 more rows]

## Sheet: AM+ML
Chromosome	Start	End	Length(bp)
1	1409198	1409433	236
1	1701991	1704572	2582
1	1967033	1967784	752
1	1978919	1979655	737
1	2056109	2056880	772
1	2106434	2107784	1351
1	2119820	2120329	510
1	2121004	2131473	10470
1	2131600	2132045	446
1	2132458	2132458	1
1	2132474	2132893	420
1	2132970	2134296	1327
1	2134981	2139210	4230
1	2598207	2598603	397
1	2606553	2607730	1178
1	2758168	2758894	727
1	2847546	2847841	296
1	3291619	3295594	3976
1	3310618	3321109	10492
1	3444226	3445454	1229
1	3457439	3459028	1590
1	3465064	3465897	834
1	3510742	3511413	672
1	3552887	3554595	1709
1	3617077	3618557	1481
1	3620347	3621755	1409
1	3621865	3623095	1231
1	3643259	3644312	1054
1	3670494	3672489	1996
1	3745767	3746788	1022
1	3801936	3803492	1557
1	3937282	3938319	1038
1	3998264	4000489	2226
1	4062012	4062067	56
1	4068992	4070536	1545
1	4086272	4087809	1538
1	4109126	4110448	1323
1	4204118	4205859	1742
1	4257886	4259925	2040
1	4377571	4384976	7406
1	4510531	4512046	1516
1	4971349	4973564	2216
1	4983027	4983538	512
1	4984860	4985959	1100
1	4992010	4993413	1404
1	5165342	5166154	813
1	5174022	5174858	837
1	5224438	5227488	3051
1	5228999	5230961	1963
1	5371213	5372780	1568
1	5372787	5374606	1820
1	5382762	5387971	5210
1	5420415	5422715	2301
1	5423831	5426722	2892
1	5427230	5429152	1923
1	5429176	5431544	2369
1	5483050	5483237	188
1	5492487	5494832	2346
1	5510478	5511850	1373
1	5521569	5522885	1317
1	5524150	5524249	100
1	5541189	5542636	1448
1	5564185	5564785	601
1	5564917	5568830	3914
1	5569602	5571122	1521
1	5578782	5580747	1966
1	5586023	5587723	1701
1	5625647	5627881	2235
1	5662165	5663446	1282
1	5663470	5665383	1914
1	5711591	5713111	1521
1	5733132	5734786	1655
1	5739096	5739287	192
1	5742382	5743415	1034
1	5743774	5743787	14
1	5937919	5938864	946
1	5974545	5974914	370
1	5974938	5976577	1640
1	6023648	6026224	2577
1	6153004	6154360	1357
1	6306032	6306201	170
1	6307371	6307430	60
1	6539130	6539788	659
1	6542793	6544231	1439
1	6545915	6548025	2111
1	6548765	6549193	429
1	6553346	6553693	348
1	6601050	6602982	1933
1	6659399	6660681	1283
1	6737715	6739221	1507
1	7019905	7021815	1911
1	7022083	7026817	4735
1	7027672	7029795	2124
1	7208300	7213124	4825
1	7374646	7375901	1256
1	7680261	7682153	1893
1	7695570	7696041	472
1	7920742	7921136	395
1	7926588	7928548	1961
1	7933016	7933509	494
1	7947674	7948942	1269
1	7961750	7962898	1149
1	7963350	7963587	238
1	7965053	7966337	1285
1	8003654	8005134	1481
1	8043942	8044628	687
1	8049782	8053120	3339
1	8317991	8319039	1049
1	8409921	8411644	1724
1	8526132	8527418	1287
1	8528664	8529747	1084
1	8900253	8901662	1410
1	8919808	8920971	1164
1	8996917	8998308	1392
1	9479801	9480801	1001
1	9672063	9674301	2239
1	9676086	9677987	1902
1	9893709	9893849	141
1	9894322	9895238	917
1	9898368	9898739	372
1	9899633	9899682	50
1	10134928	10136499	1572
1	10362538	10363503	966
1	10363890	10363890	1
1	10365010	10365480	471
1	10365578	10366673	1096
1	10585964	10587551	1588
1	10673233	10674446	1214
1	10716783	10718015	1233
1	10841716	10843251	1536
1	11409533	11411240	1708
1	11586007	11586643	637
1	11611917	11613874	1958
1	11620701	11620821	121
1	11623366	11624324	959
1	11624364	11624978	615
1	11625023	11625567	545
1	11625747	11628284	2538
1	11629491	11632758	3268
1	11665810	11667043	1234
1	11701136	11702532	1397
1	11702914	11704113	1200
1	11717063	11722817	5755
1	11744576	11745763	1188
1	11747423	11747497	75
1	11750651	11751384	734
1	11753643	11756276	2634
1	11757789	11759135	1347
1	11770220	11771078	859
1	11833279	11833839	561
1	11852474	11855200	2727
1	11860135	11862519	2385
1	11946326	11947390	1065
1	11947575	11947939	365
1	12241375	12242829	1455
1	12252333	12254569	2237
1	12310368	12311711	1344
1	12324683	12327244	2562
1	12704480	12705283	804
1	12761163	12761898	736
1	12995125	12996998	1874
1	13006178	13007426	1249
1	13304000	13305502	1503
1	13311840	13313685	1846
1	13361123	13362623	1501
1	13408233	13408351	119
1	13583376	13584443	1068
1	13654817	13656186	1370
1	13656203	13656595	393
1	13759332	13760681	1350
1	14193180	14195211	2032
1	14238828	14241218	2391
1	14252621	14254706	2086
1	14313237	14314822	1586
1	14318870	14320825	1956
1	14332268	14334368	2101
1	14341565	14348240	6676
1	14427861	14441356	13496
1	14441960	14459647	17688
1	14635387	14636186	800
1	14654111	14655739	1629
1	14659203	14661116	1914
1	14673445	14673770	326
1	14695787	14695789	3
1	14695868	14696377	510
1	14775183	14775808	626
1	14776917	14779903	2987
1	14780128	14783169	3042
1	14789865	14791011	1147
1	14799635	14800769	1135
1	14803849	14804882	1034
1	14861891	14863206	1316
1	14881701	14882686	986
1	14882991	14885021	2031
1	14986582	14987918	1337
1	14990447	14992735	2289
1	15090475	15091867	1393
1	15118090	15118681	592
1	15155594	15157611	2018
1	15308765	15310118	1354
1	15346431	15346433	3
1	15378728	15379394	667
1	15379457	15379490	34
1	15379656	15379975	320
1	15399438	15399449	12
1	15418107	15419090	984
1	15462701	15465633	2933
1	15473840	15474469	630
1	15478505	15478880	376
1	15504987	15506475	1489
1	15506526	15508424	1899
1	15511651	15513953	2303
1	15524272	15525603	1332
1	15696359	15697488	1130
1	15751202	15751568	367
1	15751863	15753322	1460
1	15810410	15812798	2389
1	15839032	15839956	925
1	15840125	15840773	649
1	15868595	15873146	4552
1	15880718	15884461	3744
1	15885195	15889761	4567
1	15897279	15897776	498
1	15936397	15939043	2647
1	15977929	15977929	1
1	15978118	15980101	1984
1	15990019	15990521	503
1	16102837	16104174	1338
1	16147346	16149574	2229
1	16156092	16157172	1081
1	16260045	16261767	1723
1	16271576	16272279	704
1	16390122	16391507	1386
1	16438299	16439487	1189
1	16993898	16995463	1566
1	17085490	17086289	800
1	17357705	17357858	154
1	17358197	17359907	1711
1	17823081	17824295	1215
1	17843968	17845253	1286
1	17869069	17869088	20
1	17892636	17894023	1388
1	17902134	17903353	1220
1	17906890	17908422	1533
1	17922763	17923964	1202
1	17930649	17931756	1108
1	17981147	17982787	1641
1	17992162	17992585	424
1	18008767	18011619	2853
1	18038164	18039353	1190
1	18064386	18065104	719
1	18076170	18077418	1249
1	18079270	18080341	1072
1	18085613	18087097	1485
1	18117008	18126871	9864
1	18130995	18132274	1280
1	18146920	18148245	1326
1	18148635	18151981	3347
1	18171239	18172738	1500
1	18185039	18186488	1450
1	18188063	18188904	842
1	18220539	18221192	654
1	18226495	18227695	1201
1	18251916	18252096	181
1	18302563	18303781	1219
1	18368986	18370260	1275
1	18383765	18385215	1451
1	18819341	18827482	8142
1	18835068	18836482	1415
1	18878884	18879426	543
1	18879752	18879790	39
1	18980870	18983393	2524
1	19740834	19744831	3998
1	19834061	19834297	237
1	19855149	19856618	1470
1	19869079	19873177	4099
1	19879633	19881159	1527
1	19888063	19889045	983
1	19948341	19950163	1823
1	19950909	19953363	2455
1	19978368	19979838	1471
1	19985108	19987548	2441
1	20033958	20047509	13552
1	20068805	20071577	2773
1	20083372	20086667	3296
1	20239023	20242727	3705
1	20242782	20246767	3986
1	20246883	20248724	1842
1	20254243	20256857	2615
1	20259088	20261732	2645
1	20270931	20272536	1606
1	20273458	20275103	1646
1	20286176	20288184	2009
1	20289009	20291944	2936
1	20549503	20549717	215
1	20561175	20561767	593
1	20561823	20562505	683
1	20639951	20640280	330
1	20640358	20642393	2036
1	20703773	20705858	2086
1	20764960	20767017	2058
1	20767313	20767555	243
1	20948865	20949035	171
1	20973297	20974383	1087
1	20996049	20996117	69
1	21079267	21081294	2028
1	21626971	21627543	573
1	21737137	21738850	1714
1	21841201	21843867	2667
1	21846163	21846767	605
1	21971243	21972797	1555
1	21975120	21975251	132
1	22091833	22092988	1156
1	22642810	22643481	672
1	25439284	25440665	1382
1	25797682	25798646	965
1	25798781	25800630	1850
1	25800675	25800675	1
1	25800778	25803912	3135
1	25820217	25820600	384
1	25910635	25911327	693
1	26003896	26005355	1460
1	26065466	26066558	1093
1	26155723	26156715	993
1	26156819	26157052	234
1	26240218	26241848	1631
1	26241877	26244334	2458
1	26244359	26245946	1588
1	26294532	26295613	1082
1	26330828	26331573	746
1	26345600	26346934	1335
1	26347026	26347248	223
1	26352782	26353635	854
1	26757847	26758197	351
1	26765198	26767174	1977
1	26780370	26783746	3377
1	26784109	26784109	1
1	26846778	26848044	1267
1	26854820	26856129	1310
1	26857469	26858714	1246
1	26883130	26885049	1920
1	26893210	26897933	4724
1	26898952	26899248	297
1	26899665	26902629	2965
1	26903898	26904087	190
1	26927222	26927251	30
1	26927704	26929872	2169
1	26966839	26967548	710
1	27035060	27052974	17915
1	27053432	27075853	22422
1	27077575	27077874	300
1	27108760	27108794	35
1	27116343	27117662	1320
1	27124654	27126366	1713
1	27153079	27154047	969
1	27165827	27167180	1354
1	27184625	27184653	29
1	27184709	27186378	1670
1	27274185	27275764	1580
1	27568263	27568879	617
1	27628108	27629368	1261
1	27661391	27662334	944
1	27678024	27679144	1121
1	27694083	27694645	563
1	27708398	27709542	1145
1	27725412	27726276	865
1	27726373	27726725	353
1	27808143	27808435	293
1	27809556	27809720	165
1	27835594	27837304	1711
1	27841144	27842424	1281
1	27844709	27845199	491
1	27846272	27846515	244
1	29256076	29257355	1280
1	29315218	29315661	444
1	29315848	29316139	292
1	29568082	29569454	1373
1	29576678	29577238	561
1	29577901	29577901	1
1	29679337	29680404	1068
1	29686922	29687754	833
1	29788091	29788776	686
1	29806072	29807454	1383
1	29867102	29867725	624
1	30043621	30044614	994
1	30165347	30167081	1735
1	30202472	30202659	188
1	30202807	30203725	919
1	30490688	30490703	16
1	30490759	30492947	2189
1	30493817	30494235	419
1	30495459	30496649	1191
1	30936271	30937726	1456
1	31023674	31025333	1660
1	31353200	31354484	1285
1	31557558	31558623	1066
1	31652629	31653763	1135
1	31654949	31657430	2482
1	31792917	31794564	1648
1	32144865	32146246	1382
1	32148421	32149822	1402
1	32212801	32213100	300
1	32214302	32214881	580
1	32238830	32240161	1332
1	32295741	32296026	286
1	32306013	32307907	1895
1	32307982	32308225	244
1	32308290	32309584	1295
1	32309619	32310377	759
1	32320287	32322238	1952
1	32377985	32378787	803
1	32625449	32626094	646
1	32626150	32626671	522
1	32689621	32691231	1611
1	32715813	32716199	387
1	32731970	32731987	18
1	32744459	32744683	225
1	32887966	32888458	493
1	32906235	32906973	739
1	32910857	32912774	1918
1	32913001	32915483	2483
1	33135326	33136929	1604
1	33156331	33157519	1189
1	33178359	33178553	195
1	33344367	33349977	5611
1	33377519	33378304	786
1	33384407	33388401	3995
1	33390780	33390933	154
1	33391034	33393684	2651
1	33405879	33406944	1066
1	33406946	33409643	2698
1	33430447	33434038	3592
1	33462216	33463532	1317
1	33520439	33521433	995
1	33544947	33544996	50
1	33594984	33596426	1443
1	33601447	33602612	1166
1	33606255	33608266	2012
1	33608805	33610759	1955
1	33623645	33624901	1257
1	33629046	33630464	1419
1	33688735	33689207	473
1	33689317	33690631	1315
1	33715261	33716483	1223
1	33757336	33759928	2593
1	33928597	33930077	1481
1	33950702	33952615	1914
1	34097700	34101056	3357
1	34108106	34146927	38822
1	34153216	34196938	43723
1	34209574	34211865	2292
1	34609291	34615024	5734
1	35213040	35218360	5321
1	35249474	35254567	5094
1	35275036	35276518	1483
1	35276649	35280482	3834
1	35280605	35285145	4541
1	35285374	35287609	2236
1	35288471	35289775	1305
1	35290863	35293164	2302
1	35297766	35299554	1789
1	35304314	35306429	2116
1	35306499	35312892	6394
1	35541016	35543087	2072
1	35544506	35545934	1429
1	35556216	35557820	1605
1	35559297	35562156	2860
1	35569915	35572365	2451
1	35602398	35606969	4572
1	35668698	35670680	1983
1	35720008	35720331	324
1	35795638	35798700	3063
1	35804440	35805775	1336
1	35811564	35812173	610
1	35812310	35817233	4924
1	35817324	35819329	2006
1	35819456	35820739	1284
1	35820754	35826893	6140
1	35830158	35837064	6907
1	35900781	35906894	6114
1	35949557	35979505	29949
1	35980476	35982565	2090
1	36082203	36084613	2411
1	36267954	36274306	6353
1	36805314	36811238	5925
1	37402147	37404043	1897
1	37422172	37424416	2245
1	37594558	37594855	298
1	37594897	37595760	864
1	37751098	37751881	784
1	38041036	38042522	1487
1	38050503	38084192	33690
1	38141891	38145234	3344
1	38156544	38177630	21087
1	38179317	38202085	22769
1	38203416	38267300	63885
1	38273203	38302775	29573
1	38303188	38339899	36712
1	38341485	38350109	8625
1	38359648	38376339	16692
1	38378963	38399165	20203
1	38405627	38412586	6960
1	38438413	38439977	1565
1	38440990	38453480	12491
1	38454045	38454566	522
1	38742702	38744713	2012
1	38958359	38963067	4709
1	39020302	39023436	3135
1	39033714	39043677	9964
1	39070443	39071078	636
1	39106402	39111713	5312
1	39207870	39213528	5659
1	39226059	39233341	7283
1	39233551	39238708	5158
1	39263890	39271080	7191
1	39408052	39412971	4920
1	39780434	39785611	5178
1	39874880	39876009	1130
1	40469750	40481450	11701
1	40696249	40711619	15371
1	40862691	40865093	2403
1	40908655	40911013	2359
1	40924492	40927762	3271
1	43636406	43636900	495
1	46751681	46753649	1969
1	46754156	46755130	975
1	51237916	51241005	3090
1	51245359	51246939	1581
1	51264484	51267379	2896
1	53105506	53106856	1351
1	53106898	53107300	403
1	53107693	53110097	2405
1	53110222	53113369	3148
1	53140930	53142482	1553
1	53168066	53169175	1110
1	53174526	53176098	1573
1	53176282	53177043	762
1	53177153	53178365	1213
1	53208292	53209644	1353
1	53259972	53261316	1345
1	53317126	53318867	1742
1	53346859	53349564	2706
1	53354512	53357720	3209
1	53378361	53379013	653
1	53398581	53399660	1080
1	53400853	53402276	1424
1	54352532	54358304	5773
1	54955902	54957989	2088
1	55052079	55055418	3340
1	55055467	55081595	26129
1	55355074	55356657	1584
1	55534881	55542359	7479
1	56298091	56301328	3238
1	56314942	56317796	2855
1	56318761	56322984	4224
1	56418568	56427199	8632
1	57282005	57283201	1197
1	57288062	57289659	1598
1	57348172	57350087	1916
1	58392396	58462053	69658
1	58462383	58466409	4027
1	58852705	58854695	1991
1	58923819	58928483	4665
1	59652935	59655483	2549
1	59668823	59682337	13515
1	59909357	59911498	2142
1	59917220	59921084	3865
1	59952522	59963669	11148
1	59980562	59982399	1838
1	59995795	60001562	5768
1	60002603	60014229	11627
1	60017679	60042768	25090
1	60061086	60081517	20432
1	60168458	60171701	3244
1	61236801	61239312	2512
1	61282682	61284992	2311
1	61397333	61405322	7990
1	61411057	61419707	8651
1	61463995	61468987	4993
1	61469493	61470274	782
1	61470675	61471728	1054
1	61472446	61477174	4729
1	61576926	61590657	13732
1	61614790	61625319	10530
1	61633527	61648881	15355
1	61988738	62004819	16082
1	62006199	62012942	6744
1	62014935	62030786	15852
1	62034153	62082478	48326
1	62085422	62149910	64489
1	62159524	62190602	31079
1	62191408	62231071	39664
1	62237227	62278073	40847
1	62278366	62289606	11241
1	62290575	62340296	49722
1	62348413	62350548	2136
1	62350805	62352037	1233
1	62352938	62379383	26446
1	62383072	62491719	108648
1	62493710	62531610	37901
1	62982169	62984206	2038
1	63065017	63066367	1351
1	63083992	63086216	2225
1	63527664	63537242	9579
1	63549160	63563532	14373
1	64150172	64152448	2277
1	64178398	64180891	2494
1	64183001	64183334	334
1	64189049	64193554	4506
1	64866002	64870044	4043
1	65645229	65646389	1161
1	65945197	65947511	2315
1	66014021	66020229	6209
1	69355200	69357892	2693
1	78971971	78972324	354
1	78972808	78973612	805
1	78973668	78973668	1
1	78973713	78975106	1394
1	79000476	79003208	2733
1	87791617	87796197	4581
1	87816361	87833181	16821
1	90903421	90905526	2106
1	92146630	92147623	994
1	93232619	93234518	1900
1	93237467	93238988	1522
1	93242840	93243945	1106
1	93244115	93244251	137
1	93328159	93328737	579
1	93340237	93340319	83
1	93341144	93341928	785
1	93343996	93345222	1227
1	93346554	93348831	2278
1	93348868	93348925	58
1	93348995	93349490	496
1	93349509	93349534	26
1	93353598	93353625	28
1	93353639	93354248	610
1	93551744	93553376	1633
1	93557028	93557580	553
1	93557685	93558527	843
1	93583021	93584185	1165
1	93599390	93600207	818
1	93600476	93600721	246
1	96767374	96768054	681
1	96768546	96771574	3029
1	96772439	96781010	8572
1	96874573	96880404	5832
1	99652425	99653742	1318
1	100751531	100756477	4947
1	100782455	100783875	1421
1	101035621	101043826	8206
1	101175049	101176925	1877
1	101188618	101188988	371
1	101191802	101193123	1322
1	101242735	101258281	15547
1	101264704	101273806	9103
1	101281347	101284160	2814
1	101687632	101688618	987
1	101697903	101699195	1293
1	101977310	101978917	1608
1	102694659	102697177	2519
1	103491700	103496258	4559
1	103498677	103500704	2028
1	103506604	103506819	216
1	104016730	104018416	1687
1	106029007	106029624	618
1	116915660	116915699	40
1	116915905	116916250	346
1	116916286	116917988	1703
1	116918252	116921195	2944
1	116938364	116939675	1312
1	116939797	116940695	899
1	116941096	116942363	1268
1	116970899	116972513	1615
1	116974280	116975923	1644
1	123026912	123028240	1329
1	125191813	125195874	4062
1	125199395	125200165	771
1	131781379	131802825	21447
1	131823305	131836943	13639
1	131841579	131876120	34542
1	131876529	131888278	11750
1	133779382	133788725	9344
1	138930350	138933764	3415
1	138934328	138937651	3324
1	138944508	138954561	10054
1	138968640	138985244	16605
1	139706023	139715210	9188
1	139715967	139719360	3394
1	142543468	142546357	2890
1	144069167	144077241	8075
1	144119640	144121488	1849
1	144284768	144296594	11827
1	144878355	144880743	2389
1	145181360	145190821	9462
1	145771393	145774009	2617
1	145778683	145779272	590
1	146087058	146088705	1648
1	146469345	146488496	19152
1	146549100	146618181	69082
1	146635893	146661850	25958
1	146737508	146756310	18803
1	146757207	146781228	24022
1	146781555	146795608	14054
1	146847532	146850832	3301
1	146939138	146951174	12037
1	147082780	147084723	1944
1	147087122	147098182	11061
1	147145538	147158559	13022
1	147180220	147225600	45381
1	147226496	147239164	12669
1	147243371	147261131	17761
1	147305037	147306509	1473
1	147309036	147311324	2289
1	147346959	147348759	1801
1	147356793	147358291	1499
1	147358735	147361054	2320
1	147375994	147378341	2348
1	147378348	147383665	5318
1	147385424	147385814	391
1	147386621	147386645	25
1	147387801	147388133	333
1	147499696	147501541	1846
1	147503719	147506832	3114
1	147508596	147511085	2490
1	147515000	147518011	3012
1	147523508	147528304	4797
1	147544297	147550674	6378
1	147598933	147603694	4762
1	147643488	147645593	2106
1	147647211	147651684	4474
1	147930331	147932031	1701
1	148024916	148030885	5970
1	148113733	148114871	1139
1	148129923	148178302	48380
1	148195973	148198049	2077
1	148204909	148211970	7062
1	148218987	148220287	1301
1	148243808	148257756	13949
1	148258617	148281783	23167
1	148282351	148334947	52597
1	148335639	148339674	4036
1	148340563	148395643	55081
1	148405367	148408537	3171
1	148415224	148425241	10018
1	148446915	148452383	5469
1	148458367	148461564	3198
1	148470795	148473064	2270
1	148557857	148560331	2475
1	148574230	148575340	1111
1	148688270	148690110	1841
1	148885718	148888538	2821
1	148888904	148890240	1337
1	148912290	148914439	2150
1	148936670	148967917	31248
1	149002061	149004887	2827
1	149074872	149075575	704
1	149345953	149445847	99895
1	149448459	149530777	82319
1	149596477	149630253	33777
1	149639788	149654164	14377
1	149677058	149679523	2466
1	149685029	149711895	26867
1	149714533	149732631	18099
1	149734078	149754460	20383
1	149755351	149776105	20755
1	149777263	149787670	10408
1	149789218	149801772	12555
1	149802483	149828888	26406
1	149829609	149839307	9699
1	149839464	149850008	10545
1	149850660	149865595	14936
1	149865781	149934831	69051
1	149998283	150003262	4980
1	150010086	150015370	5285
1	150020545	150025766	5222
1	150036581	150041824	5244
1	150044796	150052276	7481
1	150071712	150081716	10005
1	150092648	150112170	19523
1	150112607	150151609	39003
1	150233919	150235181	1263
1	150317921	150319687	1767
1	150450210	150467371	17162
1	150503068	150512533	9466
1	150519825	150530709	10885
1	150539753	150548042	8290
1	150551342	150552682	1341
1	150553308	150555328	2021
1	150556261	150572987	16727
1	150610160	150630908	20749
1	150632466	150642065	9600
1	150643477	150647510	4034
1	150647667	150652287	4621
1	150758450	150760574	2125
1	151683095	151691317	8223
1	151701048	151703439	2392
1	151880747	151882515	1769
1	152031260	152031441	182
1	152197763	152200407	2645
1	152365483	152366641	1159
1	152373356	152375027	1672
1	152604038	152604378	341
1	152647980	152650474	2495
1	153265445	153270886	5442
1	153274426	153280176	5751
1	153288694	153291125	2432
1	153968447	153974958	6512
1	154395813	154400509	4697
1	154402179	154406512	4334
1	154781555	154784130	2576
1	155759707	155761795	2089
1	156212330	156214120	1791
1	156551395	156558679	7285
1	156559795	156566223	6429
1	156566379	156566379	1
1	156567099	156568614	1516
1	156570523	156579193	8671
1	156580247	156767954	187708
1	156769500	156816824	47325
1	156819046	156820917	1872
1	156868582	156870766	2185
1	156886219	156889959	3741
1	156917168	156920046	2879
1	157408948	157411595	2648
1	157731250	157732961	1712
1	157740366	157745072	4707
1	157813416	157814443	1028
1	157819125	157820191	1067
1	157823107	157825556	2450
1	157854066	157923158	69093
1	157928251	157928409	159
1	157929715	157938627	8913
1	158047921	158050967	3047
1	158124492	158140490	15999
1	158160009	158164534	4526
1	158458379	158475957	17579
1	158477630	158492925	15296
1	158496928	158614490	117563
1	158663224	158664577	1354
1	158897327	158898820	1494
1	158912395	158933867	21473
1	159063905	159065210	1306
1	159514810	159520105	5296
1	159722206	159724031	1826
1	159724920	159725491	572
1	159815534	159820574	5041
1	160249895	160256199	6305
1	160661613	160663014	1402
1	160665505	160667941	2437
1	160835800	160843097	7298
1	160883941	160892208	8268
1	160997213	160998644	1432
1	161104187	161105954	1768
1	161227625	161228916	1292
1	161291887	161292222	336
1	161329206	161356573	27368
1	161380043	161380958	916
1	161428773	161430843	2071
1	161431383	161446969	15587
1	161454692	161471375	16684
1	161528236	161543414	15179
1	161587031	161589372	2342
1	161642488	161643209	722
1	161644223	161656918	12696
1	161666487	161668526	2040
1	161699575	161703806	4232
1	161706792	161708445	1654
1	161754530	161757837	3308
1	161791201	161795797	4597
1	161795905	161807255	11351
1	161817056	161819587	2532
1	161839184	161841508	2325
1	161841902	161852313	10412
1	161852590	161855785	3196
1	161883318	161883808	491
1	161894486	161895408	923
1	161897259	161899376	2118
1	161907235	161911151	3917
1	162069289	162071401	2113
1	162235567	162253098	17532
1	162255848	162258317	2470
1	162260900	162263115	2216
1	162281010	162282454	1445
1	162346282	162347680	1399
1	162414309	162415341	1033
1	162542934	162562747	19814
1	162565570	162576658	11089
1	162647253	162648367	1115
1	162671383	162671964	582
1	162673721	162675253	1533
1	162680723	162775259	94537
1	162816391	162820387	3997
1	162934564	162938006	3443
1	163004368	163005745	1378
1	163014373	163059881	45509
1	163061790	163079589	17800
1	163084822	163150888	66067
1	163220239	163225616	5378
1	163295959	163296798	840
1	163567040	163577830	10791
1	163580616	163645947	65332
1	163971543	163973527	1985
1	163994438	163996135	1698
1	164030018	164030488	471
1	164031497	164031719	223
1	164033462	164034281	820
1	164056828	164057476	649
1	164065713	164068097	2385
1	164068238	164068254	17
1	164069636	164070327	692
1	164070562	164071314	753
1	164077217	164077460	244
1	164119476	164143264	23789
1	164143934	164152524	8591
1	164192963	164208665	15703
1	164210168	164224332	14165
1	164284928	164285441	514
1	164285847	164288307	2461
1	164354834	164360888	6055
1	164365310	164379522	14213
1	164379679	164435677	55999
1	164436017	164436638	622
1	164437027	164438659	1633
1	164439041	164453972	14932
1	164454485	164482803	28319
1	164486697	164499718	13022
1	164499924	164509991	10068
1	164510727	164527514	16788
1	164527855	164604202	76348
1	164605299	164705233	99935
1	164755107	164762525	7419
1	164845241	164867410	22170
1	164928545	164934811	6267
1	165090797	165093598	2802
1	165316976	165348781	31806
1	165352416	165368285	15870
1	165369930	165392184	22255
1	165399144	165442615	43472
1	165873756	165879124	5369
1	166530317	166531571	1255
1	166594084	166595483	1400
1	167183216	167186395	3180
1	168068933	168069842	910
1	168113001	168113361	361
1	170776487	170780318	3832
1	170995386	170999581	4196
1	171522969	171525770	2802
1	171585173	171595422	10250
1	171607617	171611679	4063
1	171671856	171686494	14639
1	171707598	171717217	9620
1	171823396	171844942	21547
1	171853663	171870252	16590
1	171997122	172001898	4777
1	172033289	172046151	12863
1	172047486	172049767	2282
1	172055961	172061968	6008
1	172264802	172286374	21573
1	172326854	172344958	18105
1	172346676	172363672	16997
1	172371983	172377643	5661
1	172394721	172413387	18667
1	172414058	172457806	43749
1	172559850	172568993	9144
1	172956862	172958299	1438
1	172966452	172971333	4882
1	172972557	172974520	1964
1	172981484	172987593	6110
1	172989237	172992091	2855
1	172993502	172996586	3085
1	173003750	173004806	1057
1	173061161	173064641	3481
1	173067507	173069754	2248
1	173074167	173093631	19465
1	173094146	173115067	20922
1	173116021	173163996	47976
1	173289403	173292055	2653
1	173337078	173342576	5499
1	173347319	173353969	6651
1	173463692	173465374	1683
1	173472275	173477861	5587
1	173481110	173489489	8380
1	173607899	173610375	2477
1	173666299	173670274	3976
1	173677440	173680375	2936
1	173781337	173783798	2462
1	174183620	174189196	5577
1	174253063	174254355	1293
1	174920822	174921696	875
1	174972853	174985514	12662
1	174995921	175041202	45282
1	175703768	175705787	2020
1	175846711	175849603	2893
1	176104277	176107329	3053
1	177279757	177280588	832
1	177735385	177737382	1998
1	177747280	177748520	1241
1	177750681	177751946	1266
1	178293144	178295272	2129
1	178435054	178436483	1430
1	178446924	178447657	734
1	178449554	178455870	6317
1	178481424	178495575	14152
1	178496515	178506233	9719
1	178611922	178623114	11193
1	178626801	178642317	15517
1	178705017	178714882	9866
1	178716312	178722527	6216
1	178745366	178747197	1832
1	178889075	178892167	3093
1	178893746	178896591	2846
1	178923082	178923799	718
1	178958300	178959355	1056
1	178974174	178979667	5494
1	179124027	179128638	4612
1	179796592	179800184	3593
1	179826128	179828003	1876
1	179837124	179839864	2741
1	180159111	180160939	1829
1	180619225	180619596	372
1	180835572	180838252	2681
1	180877011	180878215	1205
1	181294590	181301921	7332
1	181302719	181303280	562
1	181327666	181328110	445
1	181328853	181372082	43230
1	181658641	181662178	3538
1	181920198	181921739	1542
1	181926675	181977310	50636
1	181978556	182106920	128365
1	182109864	182129550	19687
1	182130977	182173463	42487
1	182174017	182176445	2429
1	182176591	182196937	20347
1	182198187	182241822	43636
1	182242570	182250144	7575
1	182251183	182384443	133261
1	182390588	182434059	43472
1	182439215	182456888	17674
1	182459118	182464533	5416
1	182465115	182468303	3189
1	182468794	182503799	35006
1	182504330	182533028	28699
1	182534359	182615489	81131
1	182615930	182618890	2961
1	182909536	182911962	2427
1	182915325	182919838	4514
1	183003479	183004764	1286
1	183005830	183008620	2791
1	183116772	183118944	2173
1	183201155	183202753	1599
1	183215168	183220859	5692
1	183235214	183237669	2456
1	183346540	183355060	8521
1	183364591	183371020	6430
1	183470955	183487307	16353
1	183489921	183494093	4173
1	183671396	183678188	6793
1	183792600	183799051	6452
1	183858380	183861232	2853
1	183995293	183999652	4360
1	184151948	184161023	9076
1	184288973	184313462	24490
1	184314026	184339923	25898
1	184341205	184383967	42763
1	184385541	184424932	39392
1	184426540	184439244	12705
1	184439804	184479293	39490
1	184480912	184523130	42219
1	184526399	184579493	53095
1	184583927	184644209	60283
1	184646069	184674669	28601
1	184676849	184720735	43887
1	185698328	185701315	2988
1	185820241	185824109	3869
1	185891769	185892703	935
1	185900590	185926074	25485
1	185932819	185944592	11774
1	185946206	185974419	28214
1	185992207	185993402	1196
1	186138854	186142424	3571
1	186271801	186312128	40328
1	186327203	186478967	151765
1	186484009	186584751	100743
1	186585283	186626043	40761
1	186626576	186635650	9075
1	186637224	186661717	24494
1	186663057	186739268	76212
1	186739885	186759359	19475
1	186759569	186851592	92024
1	186853191	186928826	75636
1	186929401	186932752	3352
1	186934798	187006337	71540
1	187006709	187017613	10905
1	187020282	187067509	47228
1	187070747	187076098	5352
1	187179575	187180578	1004
1	187255484	187264962	9479
1	187313463	187320844	7382
1	187324419	187338572	14154
1	187361381	187362042	662
1	187366362	187367263	902
1	187372576	187374213	1638
1	187381674	187383974	2301
1	187397369	187401262	3894
1	187746544	187748945	2402
1	187981073	187991270	10198
1	188065108	188071236	6129
1	188457536	188462030	4495
1	188464758	188468786	4029
1	188599772	188604377	4606
1	188640696	188642236	1541
1	188806953	188809647	2695
1	188827288	188833699	6412
1	188834472	188837204	2733
1	188915687	188916249	563
1	188930879	188935569	4691
1	189011413	189013205	1793
1	189115562	189149588	34027
1	189622149	189624020	1872
1	189630728	189634008	3281
1	190129984	190131915	1932
1	190133233	190135963	2731
1	190136419	190142707	6289
1	190289308	190291227	1920
1	190817707	190819656	1950
1	190823768	190824458	691
1	191162914	191166346	3433
1	191168828	191169623	796
1	191420263	191422062	1800
1	191509060	191512509	3450
1	191556689	191560250	3562
1	192352674	192357450	4777
1	192765620	192766677	1058
1	192883401	192885747	2347
1	200932406	200938071	5666
1	200947596	200949053	1458
1	201202149	201212326	10178
1	201321211	201327076	5866
1	201670399	201674521	4123
1	201746368	201754256	7889
1	202817106	202822957	5852
1	205129829	205131451	1623
1	205134618	205135946	1329
1	207633657	207639958	6302
1	207764113	207766579	2467
1	207767015	207768543	1529
1	207770967	207770967	1
1	207771431	207771706	276
1	207771910	207772712	803
1	209702648	209707123	4476
1	217550088	217550725	638
1	221581704	221592081	10378
1	221901177	221902577	1401
1	222183780	222195299	11520
1	222406082	222407396	1315
1	222407411	222408727	1317
1	222446900	222449045	2146
1	222506791	222507298	508
1	222544568	222545888	1321
1	222546487	222546799	313
1	222546804	222548888	2085
1	222564584	222564604	21
1	222580452	222582383	1932
1	222582549	222587649	5101
1	228255257	228258077	2821
1	228309165	228310617	1453
1	228437755	228438896	1142
1	228501723	228504576	2854
1	228830009	229043743	213735
1	229392815	229393729	915
1	229537744	229600683	62940
1	229601520	229644374	42855
1	229647131	229664588	17458
1	229719454	229720765	1312
1	229773516	229781254	7739
1	229798824	229803605	4782
1	229806870	229808885	2016
1	229848943	230113241	264299
1	230114417	230144495	30079
1	230145175	230171469	26295
1	230172365	230177425	5061
1	230178943	230396886	217944
1	230397328	230401740	4413
1	230402286	230418345	16060
1	230419181	230441343	22163
1	230442464	230548670	106207
1	230549328	230562266	12939
1	230565472	230579548	14077
1	230587369	230597115	9747
1	230732479	230741799	9321
1	230855281	230856405	1125
1	231839699	231842513	2815
1	231844183	231845772	1590
1	232087753	232090801	3049
1	232124641	232127454	2814
1	232138289	232147729	9441
1	232626811	232634913	8103
1	232638208	232643616	5409
1	232646251	232652587	6337
1	237495228	237497283	2056
1	237503329	237503744	416
1	237690585	237691734	1150
1	238263626	238264250	625
1	238279497	238283340	3844
1	238283417	238283427	11
1	238283585	238284220	636
1	238487604	238488417	814
1	238684510	238693934	9425
1	238745781	238753929	8149
1	238875423	238878387	2965
1	238899786	238902232	2447
1	238921329	238924905	3577
1	239120270	239122944	2675
1	239135002	239137957	2956
1	239139176	239142004	2829
1	239142200	239161404	19205
1	239245579	239245923	345
1	239396284	239396964	681
1	239481763	239486981	5219
1	239555969	239558205	2237
1	239595813	239597149	1337
1	239871790	239873340	1551
1	239918246	239918932	687
1	239927361	239930291	2931
1	240089502	240093353	3852
1	240250313	240252019	1707
1	240640906	240642648	1743
1	240715830	240717738	1909
1	240749382	240751120	1739
1	240752390	240753474	1085
1	240772697	240773280	584
1	240976576	240977867	1292
1	241028991	241030468	1478
1	242801592	242807299	5708
1	242869905	242888043	18139
1	242898424	242899094	671
1	242900114	242907527	7414
1	243083822	243109162	25341
1	243125713	243126775	1063
1	243160008	243163988	3981
1	243434520	243440820	6301
1	243495638	243496744	1107
1	243535929	243540933	5005
1	243577553	243578899	1347
1	243586986	243588778	1793
1	243624609	243626100	1492
1	243632667	243638013	5347
1	243653108	243655887	2780
1	243790124	243791922	1799
1	243792566	243793330	765
1	243807503	243808801	1299
1	243837047	243838966	1920
1	243894675	243907415	12741
1	244086439	244102277	15839
1	244109212	244114119	4908
1	244116729	244127528	10800
1	244162670	244164604	1935
1	244171337	244172389	1053
1	244304031	244305268	1238
1	244308192	244318601	10410
1	244519956	244524784	4829
1	244525200	244525200	1
1	244556398	244565449	9052
1	244565701	244566488	788
1	244567166	244578853	11688
1	244608423	244614524	6102
1	244617091	244622033	4943
1	244718896	244735649	16754
1	244865599	244868206	2608
1	244907031	244908639	1609
1	244971126	244980913	9788
1	245053690	245055598	1909
1	245079293	245082487	3195
1	245096241	245098905	2665
1	245165743	245174786	9044
1	245175068	245183385	8318
1	245200653	245213972	13320
1	245214421	245250870	36450
1	245252748	245263344	10597
1	245264366	245279850	15485
1	245281237	245283208	1972
1	245284098	245333221	49124
1	245359854	245382347	22494
1	245419643	245422929	3287
1	245474664	245479072	4409
1	245490370	245493412	3043
1	245809936	245829153	19218
1	245829823	245830733	911
1	245830889	245843910	13022
1	245844851	245871029	26179
1	245871067	245871743	677
1	245871849	245871958	110
1	245877937	245882635	4699
1	245883290	245944848	61559
1	245945703	245948926	3224
1	245949408	245962301	12894
1	245962788	245983967	21180
1	245985288	246005036	19749
1	246006913	246030059	23147
1	246031658	246048611	16954
1	246049188	246062045	12858
1	246062996	246078543	15548
1	246079730	246095508	15779
1	246096387	246101514	5128
1	246102807	246140744	37938
1	246141377	246147893	6517
1	246177258	246177651	394
1	246198741	246285385	86645
1	246285881	246308775	22895
1	246310255	246338715	28461
1	246388761	246399894	11134
1	246400451	246402995	2545
1	246410853	246411890	1038
1	246623736	246625597	1862
1	246638471	246638880	410
1	246704939	246711124	6186
1	246769656	246776596	6941
1	246814266	246817982	3717
1	246820876	246824732	3857
1	246826516	246828797	2282
1	246829439	246830583	1145
1	246961325	246963843	2519
1	246966893	246967916	1024
1	247068283	247071507	3225
1	247077856	247083887	6032
1	247153703	247154649	947
1	247196406	247199040	2635
1	247208187	247210045	1859
1	247290313	247291862	1550
1	247296594	247296629	36
1	247747756	247749222	1467
1	247893185	247894421	1237
1	248082641	248083724	1084
1	248085661	248087918	2258
1	248100229	248107689	7461
1	248108233	248148714	40482
1	248158084	248161308	3225
1	248161785	248176808	15024
1	248226003	248236715	10713
1	248246559	248262006	15448
1	248317475	248318921	1447
1	248342604	248343187	584
1	248401354	248401808	455
1	248511571	248514839	3269
1	248558511	248559468	958
1	248561355	248562273	919
1	248624059	248631325	7267
1	248724322	248726309	1988
1	248857791	248860873	3083
1	249185503	249186747	1245
1	250270701	250270782	82
1	250306923	250307901	979
1	250392040	250393503	1464
1	250449516	250450218	703
1	250463648	250464426	779
1	250556614	250558142	1529
1	250602514	250603480	967
1	250689482	250690295	814
1	250762083	250762851	769
1	250775867	250776379	513
1	250805156	250806517	1362
1	250827598	250828324	727
1	250858880	250860483	1604
1	250887107	250888996	1890
1	250889034	250890242	1209
1	250891683	250891770	88
1	250892541	250893421	881
1	250931373	250934467	3095
1	251013075	251013375	301
1	251016082	251017262	1181
1	251184228	251185721	1494
1	251473370	251475253	1884
1	251475306	251477234	1929
1	251484700	251485823	1124
1	251496822	251498237	1416
1	251694742	251695106	365
1	251727312	251731115	3804
1	251742846	251744491	1646
1	251789613	251790036	424
1	252053121	252054735	1615
1	252159051	252161466	2416
1	252169420	252171761	2342
1	252171791	252172762	972
1	252172805	252175224	2420
1	252238653	252244610	5958
1	252244731	252246583	1853
1	252247301	252247475	175
1	252248207	252249402	1196
1	252249465	252249547	83
1	252249702	252250782	1081
1	252268642	252272653	4012
1	252273433	252275460	2028
1	252379628	252380917	1290
1	252455400	252456779	1380
1	252457379	252457774	396
1	252457975	252459011	1037
1	252459340	252461057	1718
1	252461568	252463637	2070
1	252488268	252489679	1412
1	252519994	252522337	2344
1	252533838	252535658	1821
1	252643390	252644052	663
1	252816653	252818045	1393
1	252818270	252819912	1643
1	253326053	253327228	1176
1	253327307	253327562	256
1	253527359	253529252	1894
1	253530933	253531806	874
1	253811283	253813198	1916
1	254203351	254204314	964
1	254220922	254222138	1217
1	254297963	254300088	2126
1	254324167	254325739	1573
1	254332147	254332167	21
1	254368217	254369111	895
1	254369493	254369528	36
1	254378451	254378673	223
1	254562286	254563291	1006
1	254607896	254609089	1194
1	254639761	254640567	807
1	255038255	255039161	907
1	255041863	255041970	108
1	255054574	255056208	1635
1	255056451	255057587	1137
1	255075324	255075843	520
1	255075883	255077099	1217
1	255082328	255083609	1282
1	256298287	256300156	1870
1	257041260	257043144	1885
1	257044435	257045640	1206
1	257049474	257051019	1546
1	257051892	257052710	819
1	257213889	257214815	927
1	257307861	257308109	249
1	257377893	257379368	1476
1	257379868	257382478	2611
1	257382503	257384329	1827
1	257506796	257509629	2834
1	257511953	257514237	2285
1	257612632	257613765	1134
1	257926767	257926936	170
1	258052336	258054784	2449
1	258180670	258183334	2665
1	258183914	258185011	1098
1	258185137	258185231	95
1	258613480	258614566	1087
1	259201665	259202948	1284
1	259526820	259527818	999
1	259577872	259579099	1228
1	259644629	259645611	983
1	259656880	259658030	1151
1	259677941	259679596	1656
1	259681441	259683864	2424
1	259767061	259768674	1614
1	259794825	259795505	681
1	259812484	259814183	1700
1	259855075	259856552	1478
1	259858348	259858354	7
1	259858384	259862401	4018
1	259919329	259920661	1333
1	259966645	259967625	981
1	260121720	260123627	1908
1	260137608	260137884	277
1	260199424	260199424	1
1	260209446	260210751	1306
1	260214220	260216455	2236
1	260224599	260224599	1
1	260231384	260251889	20506
1	260252098	260253833	1736
1	260335902	260336970	1069
1	260416716	260418090	1375
1	260419425	260420740	1316
1	260767788	260768804	1017
1	261197560	261201449	3890
1	261490461	261491763	1303
1	261783252	261785226	1975
1	262275578	262276853	1276
1	262277575	262279230	1656
1	263021219	263022110	892
1	263022116	263022636	521
1	263022673	263022854	182
1	263022864	263023469	606
1	263025123	263025167	45
1	263042682	263043697	1016
1	263078196	263080431	2236
1	263088292	263088522	231
1	263095600	263095772	173
1	263192873	263194079	1207
1	263194512	263196346	1835
1	266376094	266379428	3335
1	266718778	266720523	1746
1	267455580	267456552	973
1	267456591	267458748	2158
1	267483915	267484941	1027
1	267505958	267507495	1538
1	267527244	267528276	1033
1	267823648	267825022	1375
1	267889782	267891533	1752
1	267907974	267908143	170
1	267935645	267937169	1525
1	267942095	267944389	2295
1	267946139	267947406	1268
1	267947523	267948270	748
1	267948278	267950929	2652
1	268103921	268105449	1529
1	268106395	268110078	3684
1	268110771	268111173	403
1	268743044	268743600	557
1	269046458	269047789	1332
1	269048722	269050280	1559
1	269445400	269445466	67
1	269554449	269557021	2573
1	269705958	269706879	922
1	269735409	269737590	2182
1	269953582	269954819	1238
1	270093421	270093434	14
1	270198142	270199810	1669
1	270207854	270208914	1061
1	270276068	270276429	362
1	270346550	270348644	2095
1	270356561	270357070	510
1	270357098	270359295	2198
1	270359476	270360873	1398
1	270371540	270371544	5
1	270372091	270373426	1336
1	270669657	270669755	99
1	270707845	270710166	2322
1	270710204	270713194	2991
1	270774306	270774769	464
1	271220919	271221925	1007
1	271223486	271224975	1490
1	271312366	271314588	2223
1	271315524	271315937	414
1	271316709	271317669	961
1	271903619	271904659	1041
1	272205806	272206097	292
1	272206463	272207139	677
1	272772630	272774187	1558
1	272951894	272952290	397
1	272963966	272963984	19
1	272964003	272965099	1097
1	273092766	273094759	1994
1	273955818	273957389	1572
2	1034751	1035428	678
2	1129389	1130871	1483
2	1167761	1168663	903
2	1217370	1218001	632
2	1335344	1335615	272
2	1337536	1337757	222
2	1620756	1622232	1477
2	2348225	2349348	1124
2	2440708	2440708	1
2	2440795	2441696	902
2	2442029	2442884	856
2	2642099	2642862	764
2	2785792	2786348	557
2	3315855	3317888	2034
2	3422096	3423001	906
2	3657994	3659076	1083
2	3819125	3819376	252
2	3819703	3823103	3401
2	3864413	3864789	377
2	4032204	4033646	1443
2	4655448	4657500	2053
2	4660601	4661897	1297
2	5182294	5184107	1814
2	5554331	5554977	647
2	5837242	5838124	883
2	6774737	6774926	190
2	6901409	6901418	10
2	7894924	7896237	1314
2	8257163	8258494	1332
2	8377861	8379109	1249
2	8379145	8379222	78
2	8379914	8382328	2415
2	8383282	8384563	1282
2	8754407	8756087	1681
2	8773004	8774456	1453
2	10020242	10020532	291
2	10231818	10232393	576
2	10273254	10274195	942
2	10455313	10455723	411
2	10489143	10490357	1215
2	10634199	10635244	1046
2	10845449	10848424	2976
2	10920355	10922517	2163
2	11100251	11101882	1632
2	11250874	11250979	106
2	11254610	11255962	1353
2	11265237	11267079	1843
2	11267330	11267913	584
2	11426982	11427175	194
2	11429736	11431167	1432
2	11431307	11431997	691
2	11436007	11437486	1480
2	11454906	11456428	1523
2	11456652	11457068	417
2	11571030	11572593	1564
2	11578410	11578423	14
2	11601548	11602294	747
2	11861493	11862181	689
2	12609770	12610080	311
2	12670518	12670940	423
2	12747289	12747725	437
2	12918816	12920521	1706
2	12954945	12955037	93
2	12955566	12956847	1282
2	13043037	13044160	1124
2	13044171	13044590	420
2	13087852	13090988	3137
2	13398635	13398825	191
2	13507527	13508885	1359
2	13810554	13813330	2777
2	13889025	13891434	2410
2	13898920	13903929	5010
2	13922495	13925214	2720
2	13926750	13928226	1477
2	13930197	13932176	1980
2	13945074	13948263	3190
2	13948293	13950092	1800
2	13994296	13999682	5387
2	14006509	14007961	1453
2	14084649	14086513	1865
2	14579469	14579809	341
2	14733203	14733507	305
2	14733726	14735075	1350
2	14740561	14740561	1
2	14785790	14786686	897
2	14787136	14788086	951
2	14856011	14856646	636
2	15076689	15084581	7893
2	15106289	15112373	6085
2	15405138	15406825	1688
2	16641943	16644169	2227
2	16644776	16644914	139
2	16645783	16646225	443
2	16680056	16681448	1393
2	16699859	16701443	1585
2	16793949	16796089	2141
2	16796804	16797345	542
2	16851697	16852693	997
2	16913772	16914521	750
2	17029111	17030157	1047
2	17034625	17035407	783
2	17061745	17062043	299
2	17117880	17119472	1593
2	17135749	17136803	1055
2	17231048	17232318	1271
2	17330940	17332659	1720
2	17532131	17533164	1034
2	17534217	17535393	1177
2	17608727	17610624	1898
2	17986361	17987607	1247
2	18060773	18061229	457
2	18134272	18134272	1
2	18135206	18135702	497
2	18304972	18308952	3981
2	18473359	18476839	3481
2	18580108	18580284	177
2	18715955	18720509	4555
2	18739268	18769552	30285
2	19032332	19034085	1754
2	19061026	19066120	5095
2	19066181	19069767	3587
2	19070565	19070921	357
2	19209732	19211207	1476
2	19234091	19237362	3272
2	19662725	19663383	659
2	19880362	19886141	5780
2	19886971	19889922	2952
2	19890582	19893250	2669
2	20176403	20179589	3187
2	20205422	20207436	2015
2	20210175	20212849	2675
2	20236765	20237997	1233
2	20243269	20246801	3533
2	20248093	20249358	1266
2	20250402	20251925	1524
2	20258419	20259823	1405
2	20259839	20261610	1772
2	20267797	20270438	2642
2	20330990	20331616	627
2	20332753	20334404	1652
2	20343785	20345051	1267
2	20352257	20354471	2215
2	20354528	20356479	1952
2	20356938	20359152	2215
2	20361813	20367574	5762
2	20370055	20370788	734
2	20436846	20437359	514
2	20463385	20464280	896
2	20470484	20471564	1081
2	20504843	20505226	384
2	20505456	20507062	1607
2	20523343	20524190	848
2	20545212	20547128	1917
2	20547730	20547953	224
2	20553028	20558164	5137
2	20558946	20575306	16361
2	20617931	20620454	2524
2	20620646	20621982	1337
2	20628620	20631571	2952
2	20647020	20647689	670
2	20663199	20664583	1385
2	20670229	20671721	1493
2	20682209	20683125	917
2	20683532	20683730	199
2	20686298	20687228	931
2	20687257	20689562	2306
2	20716087	20717287	1201
2	20732729	20738777	6049
2	20746746	20748859	2114
2	20755684	20768009	12326
2	20769948	20774109	4162
2	20782644	20785144	2501
2	20785519	20789574	4056
2	20804416	20810507	6092
2	20811354	20812577	1224
2	20813056	20814259	1204
2	20814421	20816408	1988
2	20816681	20818878	2198
2	20819729	20821121	1393
2	20834742	20853321	18580
2	20854351	20861435	7085
2	20868706	20869643	938
2	20870260	20871470	1211
2	20879783	20881037	1255
2	20882934	20883284	351
2	20883356	20884252	897
2	20884322	20887067	2746
2	20895725	20895810	86
2	20909482	20911781	2300
2	20911845	20913423	1579
2	20914505	20915712	1208
2	20916193	20921743	5551
2	20924219	20928398	4180
2	20929025	20931412	2388
2	20931584	20931666	83
2	20934171	20938102	3932
2	20948310	20949549	1240
2	20949974	20951514	1541
2	20957089	20960367	3279
2	20962034	20969201	7168
2	20970259	20971543	1285
2	20981517	20981977	461
2	21019870	21022085	2216
2	21121733	21121964	232
2	21148894	21151280	2387
2	21186891	21187112	222
2	21335463	21336811	1349
2	21337134	21338894	1761
2	21339640	21341835	2196
2	21356398	21359569	3172
2	21364503	21366881	2379
2	21367059	21369139	2081
2	21389726	21392155	2430
2	21392406	21394018	1613
2	21415482	21418716	3235
2	21427791	21429111	1321
2	21490441	21491766	1326
2	21506332	21507869	1538
2	21543770	21544361	592
2	21548969	21549110	142
2	21549172	21551275	2104
2	21574724	21575620	897
2	21611044	21612092	1049
2	21665954	21667195	1242
2	21709679	21711386	1708
2	21711394	21711642	249
2	21749306	21751554	2249
2	21755680	21757348	1669
2	21773577	21775216	1640
2	21775941	21778208	2268
2	21780670	21782771	2102
2	21831684	21832654	971
2	21836443	21837188	746
2	22888669	22888881	213
2	22888917	22891562	2646
2	22894825	22896191	1367
2	22900591	22902580	1990
2	22903971	22909325	5355
2	23029740	23031053	1314
2	23031844	23032950	1107
2	23033039	23034625	1587
2	23147477	23151040	3564
2	23194854	23196467	1614
2	23219676	23219706	31
2	23221059	23221663	605
2	23231232	23232132	901
2	23289896	23291642	1747
2	23299583	23299721	139
2	23378607	23379990	1384
2	23395615	23397284	1670
2	23414776	23417189	2414
2	23491244	23492557	1314
2	23533177	23534228	1052
2	23540362	23540362	1
2	23540366	23541758	1393
2	23612791	23613533	743
2	23787320	23801058	13739
2	23801065	23812442	11378
2	23813072	23827607	14536
2	23841877	23843205	1329
2	23843350	23843771	422
2	23865885	23867270	1386
2	23909157	23910042	886
2	23973327	23974778	1452
2	23991609	23994359	2751
2	24001654	24003458	1805
2	24063605	24064836	1232
2	24065086	24066291	1206
2	24076862	24078117	1256
2	24097208	24098649	1442
2	24112922	24117171	4250
2	24118822	24119671	850
2	24120065	24121686	1622
2	24132214	24134820	2607
2	24139147	24139154	8
2	24144076	24146277	2202
2	24205200	24205905	706
2	24208082	24209787	1706
2	24219679	24221280	1602
2	24247132	24249098	1967
2	24273579	24275639	2061
2	24278940	24279322	383
2	24280219	24280219	1
2	24288292	24292581	4290
2	24295120	24296339	1220
2	24317424	24319003	1580
2	24347231	24348448	1218
2	24392359	24396275	3917
2	24396589	24397937	1349
2	24405189	24408390	3202
2	24415051	24422377	7327
2	24423491	24425023	1533
2	24447096	24447622	527
2	24514001	24514442	442
2	24538659	24539192	534
2	24598544	24601678	3135
2	24614976	24616352	1377
2	24617272	24619851	2580
2	24644776	24645009	234
2	24671173	24671872	700
2	24675606	24677003	1398
2	24684193	24685484	1292
2	24756522	24757250	729
2	24759499	24760935	1437
2	24765746	24766443	698
2	24778501	24780654	2154
2	24781067	24782437	1371
2	24782699	24784062	1364
2	24812565	24812565	1
2	24813092	24813829	738
2	24815317	24815433	117
2	24815539	24818346	2808
2	24818391	24819469	1079
2	24819861	24825210	5350
2	24827663	24833655	5993
2	24833780	24835668	1889
2	24860041	24861950	1910
2	24864237	24864390	154
2	24901741	24902615	875
2	24924245	24926340	2096
2	24947076	24950709	3634
2	24952165	24953384	1220
2	24953410	24953858	449
2	24971542	24972834	1293
2	25014465	25016226	1762
2	25020145	25021171	1027
2	25021388	25021508	121
2	25029941	25031269	1329
2	25038030	25038450	421
2	25047761	25048768	1008
2	25475294	25476614	1321
2	25656476	25659823	3348
2	25660797	25662090	1294
2	25750694	25752155	1462
2	25780285	25781632	1348
2	25790939	25792312	1374
2	25835677	25837227	1551
2	25838374	25839769	1396
2	25877137	25877410	274
2	25916352	25917492	1141
2	25925274	25927424	2151
2	25945730	25949442	3713
2	25952928	25955492	2565
2	26000103	26001480	1378
2	26002886	26004989	2104
2	26044709	26047642	2934
2	26071906	26073475	1570
2	26379427	26381647	2221
2	26416836	26416836	1
2	26546155	26548227	2073
2	26557323	26558546	1224
2	26642265	26642703	439
2	26642769	26643839	1071
2	26760446	26760533	88
2	26805489	26808070	2582
2	26813517	26815411	1895
2	27073018	27074673	1656
2	27103977	27104310	334
2	27268185	27269598	1414
2	27368947	27375077	6131
2	27375294	27376644	1351
2	27376712	27377791	1080
2	27379027	27386737	7711
2	27387008	27388601	1594
2	27389063	27390341	1279
2	29640493	29643953	3461
2	29646557	29651822	5266
2	29894847	29895194	348
2	29967034	29968601	1568
2	30252140	30252218	79
2	30415251	30416658	1408
2	30416731	30417855	1125
2	30443748	30445066	1319
2	30445359	30445505	147
2	31826301	31827031	731
2	33872841	33873232	392
2	33874890	33875175	286
2	33877465	33885748	8284
2	33885955	33891131	5177
2	33895412	33900422	5011
2	33901123	33902463	1341
2	33905585	33907073	1489
2	34015871	34017170	1300
2	34289527	34289538	12
2	34315307	34316553	1247
2	34319446	34319707	262
2	34840860	34841129	270
2	34879855	34881288	1434
2	35035631	35036190	560
2	35047476	35047874	399
2	35049221	35050688	1468
2	35167851	35168823	973
2	36150755	36151365	611
2	36154523	36155607	1085
2	36156167	36156296	130
2	36156356	36156934	579
2	36640573	36641170	598
2	36641594	36642643	1050
2	36645445	36645575	131
2	36645829	36647331	1503
2	36647728	36648152	425
2	36648168	36649499	1332
2	36681970	36682185	216
2	36682282	36686009	3728
2	36686079	36686079	1
2	36686092	36686130	39
2	36697456	36702290	4835
2	36798986	36799176	191
2	36800121	36801114	994
2	37336715	37339173	2459
2	37366353	37367676	1324
2	37371525	37373837	2313
2	37691938	37692034	97
2	37723973	37725149	1177
2	37818214	37820975	2762
2	38334085	38334237	153
2	38464026	38466765	2740
2	38560514	38562264	1751
2	38625898	38627253	1356
2	38653140	38655380	2241
2	38660077	38660695	619
2	38726492	38728366	1875
2	38781978	38784177	2200
2	38791362	38792178	817
2	38808394	38810286	1893
2	38810323	38810590	268
2	38811756	38811756	1
2	38811855	38813194	1340
2	38831163	38833006	1844
2	38847747	38847974	228
2	38848214	38849846	1633
2	39033278	39034994	1717
2	39103192	39106004	2813
2	39106830	39111662	4833
2	39112161	39112662	502
2	39112786	39113938	1153
2	39303367	39304645	1279
2	39365926	39367163	1238
2	39393513	39395928	2416
2	39548490	39550052	1563
2	39695139	39697471	2333
2	39765017	39766339	1323
2	39816210	39819513	3304
2	39831701	39832917	1217
2	39860979	39862120	1142
2	39872944	39874384	1441
2	39877070	39882416	5347
2	39886336	39888855	2520
2	39888932	39893478	4547
2	39907706	39909255	1550
2	39987689	39987719	31
2	39987787	39989609	1823
2	40310289	40310289	1
2	40310974	40312247	1274
[truncated: 16,429 more rows]

## Sheet: Variants in ROHR
Breed	Type	Tool	Variant type	Number of homozygous mutant variants within ROHR (n)
AM	SNPs	GATK	Coding	22
AM	SNPs	GATK	Non-coding	20870
AM	INDELs	GATK	Coding	0
AM	INDELs	GATK	Non-coding	3294
AM	BND	Manta	Non-coding	0
AM	BND	Smoove	Non-coding	0
AM	DEL	Manta	Non-coding	30
AM	DEL	Smoove	Non-coding	25
AM	DUP	Manta	Non-coding	4
AM	DUP	Smoove	Non-coding	6
AM	INS	Manta	Non-coding	0
AM	INS	Smoove	Non-coding	276
AM	INV	Manta	Non-coding	1
AM	INV	Smoove	Non-coding	0
ML	SNPs	GATK	Coding	30
ML	SNPs	GATK	Non-coding	30697
ML	INDELs	GATK	Coding	0
ML	INDELs	GATK	Non-coding	3955
ML	BND	Manta	Non-coding	0
ML	BND	Smoove	Non-coding	0
ML	DEL	Manta	Non-coding	40
ML	DEL	Smoove	Non-coding	5
ML	DUP	Manta	Non-coding	2
ML	DUP	Smoove	Non-coding	1
ML	INS	Manta	Non-coding	0
ML	INS	Smoove	Non-coding	22
ML	INV	Manta	Non-coding	0
ML	INV	Smoove	Non-coding	0
AM+ML	SNPs	GATK	Coding	0
AM+ML	SNPs	GATK	Non-coding	615
AM+ML	INDELs	GATK	Coding	0
AM+ML	INDELs	GATK	Non-coding	88
AM+ML	BND	Manta	Non-coding	0
AM+ML	DEL	Manta	Non-coding	2
AM+ML	DUP	Manta	Non-coding	0
AM+ML	INS	Manta	Non-coding	0
AM+ML	INV	Manta	Non-coding	0
AM+ML	BND	Smoove	Non-coding	0
AM+ML	DEL	Smoove	Non-coding	1
AM+ML	DUP	Smoove	Non-coding	0
AM+ML	INS	Smoove	Non-coding	28
AM+ML	INV	Smoove	Non-coding	0
