# Supplementary material for: Integrative multi-omics analysis of growth plate regulation underlying body size in miniature pigs
Source: Research Square preprint supplement (doi:10.21203/rs.3.rs-7865536/v1), 2025-12-01
Supplement: Supplementary file 4 [file 213c2242321f8010518c8317.xlsx]

## Sheet: Table 1
Table 1. Sample description by breed
Breed	n	Observations	Male	Female	Day range
AM	4	20	2 (50%)	2 (50%)	47-80
AS	9	108	2 (22.2%)	7 (77.8%)	2-78
MA	4	25	3 (75%)	1 (25%)	37-80
ML	5	27	2 (40%)	3 (60%)	5-61

## Sheet: Table 2
Table 2. Sample description by breed size
Breed	n	Observations	Male	Female	Day range
Large	13	133	5 (38.5%)	8 (61.5%)	2-80
Mini	9	47	4 (44.4%)	5 (55.6%)	5-80

## Sheet: Table 3
Table 3: Descriptive statistics by breed
Breed	Trait	Mean ± SD	Minimum	Median	Maximum
AM	Height	25.85 (3.10)	20.00	26.50	31.00
AM	Weight	6.40 (2.10)	3.51	6.33	10.19
AM	Metacarpal thickness	7.25 (0.55)	6.00	7.00	8.00
AS	Height	29.46 (8.11)	12.00	30.00	43.00
AS	Weight	8.29 (4.70)	0.71	10.00	19.00
AS	Metacarpal thickness	9.33 (1.88)	5.00	10.00	12.50
MA	Height	33.46 (2.43)	29.00	33.50	39.00
MA	Weight	12.58 (3.20)	8.20	12.00	19.50
MA	Metacarpal thickness	10.24 (0.77)	8.50	10.00	11.50
ML	Height	23.20 (3.81)	13.00	24.00	27.50
ML	Weight	4.10 (1.55)	0.79	2025-02-04	6.88
ML	Metacarpal thickness	6.70 (0.99)	5.00	7.00	8.00
Note: SD = standard deviation

## Sheet: Table 4
Table 4. Descriptive statistics by breed size
Breed	Trait	Mean ± SD	Minimum	Median	Maximum
Large	Height	30.21 (7.54)	12.00	32.00	43.00
Large	Weight	9.61 (4.67)	0.71	10.80	19.50
Large	Metacarpal thickness	9.50 (1.76)	5.00	10.00	12.50
Mini	Height	24.33 (3.73)	13.00	25.00	31.00
Mini	Weight	5.08 (2.12)	0.79	4.75	10.19
Mini	Metacarpal thickness	6.94 (0.87)	5.00	7.00	8.00
Note: SD = standard deviation

## Sheet: Table 5
Table 5. Regression parameter estimates from univariate mixed models.
Term	Height [95% CI]	Weight [95% CI]	Metacarpal thickness [95% CI]
Intercept	11.91*** [7.19, 16.62]	−4.81** [−8.24, −1.37]	4.67*** [3.07, 6.27]
Sex [male]	0.11 [−1.14, 1.36]	0.73 [−0.39, 1.86]	0.27 [−0.13, 0.68]
Breed [AS]	4.88* [0.09, 9.67]	6.48*** [2.97, 9.99]	1.86* [0.24, 3.48]
Breed [MA]	13.90*** [7.96, 19.83]	8.97*** [4.64, 13.31]	3.22** [1.21, 5.23]
Breed [ML]	3.05 [−2.16, 8.26]	4.90* [1.07, 8.72]	−0.36 [−2.13, 1.40]
Days	0.22*** [0.15, 0.30]	0.17*** [0.12, 0.23]	0.04** [0.02, 0.06]
Days × Breed [AS]	0.10** [0.02, 0.17]	0.01 [−0.05, 0.06]	0.03* [0.01, 0.06]
Days × Breed [MA]	−0.10* [−0.19, −0.01]	−0.04 [−0.11, 0.02]	−0.00 [−0.03, 0.03]
Days × Breed [ML]	−0.02 [−0.10, 0.07]	−0.08** [−0.14, −0.02]	0.02 [−0.01, 0.05]
R²	0.90	0.86	0.85
Adjusted R²	0.90	0.85	0.84
Note: Female sex and the AM breed are set as reference categories. Estimates are shown with 95% confidence intervals. Coefficient of determination (R²) and adjusted R². Significance: *** p < 0.001, ** p < 0.01, * p < 0.05.

## Sheet: Table 6
Table 6. Estimated dispersion parameters from univariate mixed models.
Component	Height	Weight	Metacarpal Thickness
τ₀ (Independent)	3.51 [2.67, 4.34] ***	1.76 [1.22, 2.29] ***	0.41 [0.30, 0.51] ***
τ₁ (Compound Symmetry)	1.30 [0.25, 2.36] *	1.20 [0.35, 2.06] **	0.13 [0.02, 0.24] *
Note: τ₀ corresponds to the independent residual variance (matrix Z₀ ), τ₁ corresponds to the compound symmetry covariance (matrix Z₁). Significance levels: : *** p < 0.001, ** p < 0.01, * p < 0.05.

## Sheet: Table 7
Table 7. Regression parameter estimates from multivariate mixed model.
Term	Height (95% CI)	Weight (95% CI)	Metacarpal Thickness (95% CI)
Intercept	16.83 [16.07, 17.59]***	1.67 [1.33, 2.01]***	6.60 [6.30, 6.91]***
Sex [male]	-0.30 [-1.39, 0.80]	0.25 [-0.28, 0.78]	0.02 [-0.30, 0.34]
Breed Size [Small]	-1.69 [-3.80, 0.42]	-1.88 [-3.02, -0.73]***	-1.82 [-2.60, -1.05]***
Days	0.30 [0.29, 0.32]***	0.17 [0.16, 0.19]***	0.068 [0.063, 0.073]***
Days × Breed Size [Small]	-0.12 [-0.16, -0.07]***	-0.07 [-0.10, -0.04]***	-0.026 [-0.039, -0.012]***
R²	0.87	0.85	0.83
Adjusted R²	0.86	0.84	0.83
Note: Coefficients reported with 95% confidence intervals. Significance: *** p < 0.001

## Sheet: Table 8
Table 8. Estimated dispersion parameters from multivariate mixed model.
Component	Height	Weight	Metacarpal Thickness
τ₀ (Independent)	5.04 [3.94, 6.14] ***	2.00 [1.26, 2.75] ***	0.57 [0.46, 0.67] ***
τ₁ (Compound Symmetry)	-0.30 [-1.37, 0.76]	-0.38 [-0.60, -0.16] **	0.05 [-0.18, 0.28]
τ₂ (Slope variance)	0.00 [0.00, 0.00]	0.00 [0.00, 0.00]	0.00 [0.00, 0.00]
τ₃ (Intercept–Slope)	0.02 [0.003, 0.04] *	0.008 [0.002, 0.01] *	0.001 [-0.003, 0.005]
Note: τ₀ = independent residual variation (Z₀), τ₁ = compound symmetry (Z₁), τ₂ = slope variance (Z₂), τ₃ = intercept - slope covariance (Z₃). Significance: *** p < 0.001

## Sheet: Table 9
Table 9. Estimated trait correlations from multivariate mixed model.
Trait Pair	⍴	95% CI	Significance
Height – Weight	0.38	[0.24, 0.51]	***
Height – Metacarpal Thickness	0.62	[0.54, 0.71]	***
Weight – Metacarpal Thickness	0.57	[0.45, 0.69]	***
Note: ⍴ represents the estimated correlation between trait pairs after accounting for covariates and random effects. 95% confidence intervals are shown in brackets. Significance: *** p < 0.001 Positive correlations indicate that individuals with higher values in one trait tend to have higher values in the other trait, conditional on the modeled effects.

## Sheet: Table 10
Table 10. Regression parameter estimates for AS breed from multivariate mixed model.
Term	Height (95% CI)	Weight (95% CI)	Metacarpal Thickness (95% CI)
Intercept	16.73 [15.90, 17.56]***	1.74 [1.44, 2.05]***	6.68 [6.30, 7.05]***
Sex [male]	0.56 [-0.96, 2.08]	0.09 [-0.40, 0.58]	0.17 [-0.35, 0.70]
Days	0.32 [0.31, 0.34]***	0.16 [0.14, 0.18]***	0.07 [0.07, 0.08]***
R²	0.90	0.79	0.77
Adjusted R²	0.90	0.79	0.77
Note: Coefficients reported with 95% confidence intervals. Significance: *** p < 0.001

[truncated: 2 more sheets: Table 11, Table 12]
