# Supplementary material for: Integrative multi-omics analysis of growth plate regulation underlying body size in miniature pigs
Source: Research Square preprint supplement (doi:10.21203/rs.3.rs-7865536/v1), 2025-12-01
Supplement: Supplementary file 5 [file 250577e34f97200a9eb8f045.xlsx]

## Sheet: Coding candidate SNVs
Supplementary Data 4. Overview of candidate variants. All variants within ROHRs meeting the genotype filtering criteria for the minipigs are given. Coding variant were assigned as "candidate variants" when having a SIFT score of <0.1. As filtering criteria for non-coding variants, they were assigned as "candidate non-coding variants" if they were located in a chromatin-contact region assigned to …
																												NGSPIG127	NGSPIG128	NGSPIG129	NGSPIG130	NGSPIG119	NGSPIG131	NGSPIG001	NGSPIG002	NGSPIG146	NGSPIG147	NGSPIG112	NGSPIG118	NGSPIG122	NGSPIG135	NGSPIG120	NGSPIG016	NGSPIG048	NGSPIG017	NGSPIG121	NGSPIG125	NGSPIG126	NGSPIG132
Phenotype	Chrom	Pos	Ref	Alt	Consequence	IMPACT	Gene Name	Ensembl ID	Feature_type	Transcript ID	BIOTYPE	EXON	INTRON	cDNA_position	CDS_position	Protein_position	Amino_acids	Codons	Existing_variation	DISTANCE	STRAND	SYMBOL_SOURCE	HGNC_ID	APPRIS	SIFT_Score	SIFT	Expresion Status	AM	AM	AM	AM	ML	ML	ML	ML	ML	ML	KK	MN	MN	MN	MN	GT	GT	GT	KK	KK	KK	PB
AM	1	53368349	T	C	missense_variant	MODERATE	CEP162	ENSSSCG00000004289	Transcript	ENSSSCT00000004742.5	protein_coding	23/27	-	3358	3046	1016	N/D	Aac/Gac	rs331224191	-	-1	HGNC	HGNC:21107	P1	0.03	deleterious(0.03)	Expressed	1/1	1/1	1/1	1/1	0/0	0/0	0/0	0/0	0/0	0/0	0/0	0/0	0/0	0/0	0/0	0/1	0/1	0/0	0/0	0/0	0/0	0/0
AM	1	66642770	T	C	missense_variant	MODERATE	ENSSSCG00000031854	ENSSSCG00000031854	Transcript	ENSSSCT00000058826.1	protein_coding	2/2	-	746	746	249	D/G	gAt/gGt	-	-	-1	-	-	P1	0.04	deleterious(0.04)	Expressed	1/1	1/1	1/1	1/1	0/0	0/0	0/1	0/0	0/0	0/0	0/0	0/0	0/0	0/1	1/1	0/1	0/1	0/1	0/0	0/0	0/0	1/1
AM	1	129033642	A	C	missense_variant	MODERATE	GANC	ENSSSCG00000004729	Transcript	ENSSSCT00000038692.3	protein_coding	19/24	-	2845	2230	744	L/V	Tta/Gta	rs338488209	-	-1	HGNC	HGNC:4139	P1	0.03	deleterious(0.03)	Expressed	1/1	1/1	1/1	1/1	1/1	1/1	0/1	1/1	1/1	1/1	0/0	1/1	1/1	1/1	1/1	0/0	1/1	0/1	0/0	0/0	0/0	1/1
AM	1	163142761	G	C	missense_variant	MODERATE	UBAP1L	ENSSSCG00000035506	Transcript	ENSSSCT00000041328.3	protein_coding	5/8	-	899	700	234	P/A	Ccc/Gcc	-	-	-1	HGNC	HGNC:40028	P1	0	deleterious(0)	Expressed	1/1	1/1	1/1	1/1	0/0	0/0	0/0	0/0	0/0	0/0	0/0	1/1	0/1	0/1	0/0	./.	./.	./.	0/0	0/0	0/0	0/0
AM	1	163142781	G	C	missense_variant	MODERATE	UBAP1L	ENSSSCG00000035506	Transcript	ENSSSCT00000041328.3	protein_coding	5/8	-	879	680	227	P/R	cCc/cGc	-	-	-1	HGNC	HGNC:40028	P1	0.08	tolerated(0.08)	Expressed	1|1	1|1	1|1	1|1	0/0	0/0	0/0	0/0	0/0	0/0	0/0	1|1	0|1	0|1	0/0	./.	./.	./.	0/0	0/0	0/0	0/0
AM	1	163142782	G	C	missense_variant	MODERATE	UBAP1L	ENSSSCG00000035506	Transcript	ENSSSCT00000041328.3	protein_coding	5/8	-	878	679	227	P/A	Ccc/Gcc	-	-	-1	HGNC	HGNC:40028	P1	0.06	tolerated(0.06)	Expressed	1|1	1|1	1|1	1|1	0/0	0/0	0/0	0/0	0/0	0/0	0/0	1|1	0|1	0|1	0/0	./.	./.	./.	0/0	0/0	0/0	0/0
ML	1	207686120	G	A	missense_variant	MODERATE	FREM1	ENSSSCG00000039025	Transcript	ENSSSCT00000037598.3	protein_coding	11/38	-	1831	1831	611	E/K	Gaa/Aaa	rs325442193	-	1	HGNC	HGNC:23399	P1	0	deleterious(0)	Expressed	0/0	0/0	0/0	0/0	1/1	1/1	1/1	1/1	1/1	1/1	0/0	0/0	0/0	0/1	0/0	0/0	0/0	0/0	0/0	0/0	0/0	0/0
ML	1	238016582	C	A	missense_variant	MODERATE	ZCCHC7	ENSSSCG00000005346	Transcript	ENSSSCT00000005885.5	protein_coding	6/11	-	923	777	259	N/K	aaC/aaA	-	-	1	HGNC	HGNC:26209	P1	0.08	tolerated(0.08)	Expressed	0/0	0/0	0/0	0/0	1/1	1/1	1/1	1/1	1/1	1/1	0/0	0/0	0/0	0/0	0/0	0/0	0/0	0/0	0/0	0/0	0/0	0/0
AM	2	13256866	C	T	missense_variant	MODERATE	ZDHHC5	ENSSSCG00000013178	Transcript	ENSSSCT00000036942.2	protein_coding	7/12	-	2098	727	243	V/I	Gta/Ata	rs81260556	-	-1	HGNC	HGNC:18472	P1	0.01	deleterious(0.01)	Expressed	1/1	1/1	1/1	1/1	0/0	0/0	0/1	0/0	0/0	0/0	0/0	1/1	1/1	0/1	0/1	1/1	0/1	1/1	0/0	0/0	0/0	1/1
ML	2	22372168	A	C	missense_variant	MODERATE	ENSSSCG00000048619	ENSSSCG00000048619	Transcript	ENSSSCT00000071144.1	protein_coding	1/1	-	2651	489	163	N/K	aaT/aaG	rs694890098	-	-1	-	-	P1	0.05	tolerated_low_confidence(0.05)	Not Expressed	0/1	1/1	0/1	1/1	1/1	1/1	1/1	1/1	1/1	1/1	0/0	0/0	0/0	0/1	1/1	0/0	1/1	0/0	0/0	0/0	0/0	0/1
ML	3	18293488	C	T	missense_variant	MODERATE	MAPK3	ENSSSCG00000040682	Transcript	ENSSSCT00000079208.1	protein_coding	7/8	-	1057	1045	349	G/R	Gga/Aga	-	-	-1	HGNC	HGNC:6877	-	0.02	deleterious_low_confidence(0.02)	Expressed	0/1	0/1	0/0	0/1	1/1	1/1	./.	1/1	1/1	1/1	0/0	0/1	0/0	0/1	0/0	0/0	0/0	./.	0/0	0/0	0/0	0/1
ML	3	106954843	G	C	missense_variant	MODERATE	TTC27	ENSSSCG00000008512	Transcript	ENSSSCT00000009315.5	protein_coding	8/21	-	1187	993	331	C/W	tgC/tgG	rs704713779	-	-1	HGNC	HGNC:25986	P1	0	deleterious(0)	Expressed	0/0	0/0	0/0	0/0	1/1	1/1	1/1	1/1	1/1	1/1	0/0	0/0	0/0	0/0	0/0	0/0	0/0	0/0	0/0	0/0	0/0	0/0
ML	3	107313387	A	G	missense_variant	MODERATE	YIPF4	ENSSSCG00000035747	Transcript	ENSSSCT00000049366.2	protein_coding	6/7	-	768	767	256	I/T	aTa/aCa	-	-	-1	HGNC	HGNC:28145	-	0.08	tolerated(0.08)	Expressed	0/0	0/0	0/0	0/0	1/1	1/1	1/1	1/1	1/1	1/1	0/0	0/0	0/0	0/0	0/0	0/0	0/0	0/0	0/0	0/0	0/0	0/0
ML	3	107313387	A	G	missense_variant	MODERATE	YIPF4	ENSSSCG00000035747	Transcript	ENSSSCT00000062769.2	protein_coding	6/8	-	590	590	197	I/T	aTa/aCa	-	-	-1	HGNC	HGNC:28145	P1	0.05	tolerated(0.05)	Expressed	0/0	0/0	0/0	0/0	1/1	1/1	1/1	1/1	1/1	1/1	0/0	0/0	0/0	0/0	0/0	0/0	0/0	0/0	0/0	0/0	0/0	0/0
AM	3	114510981	C	T	missense_variant	MODERATE	ENSSSCG00000008582	ENSSSCG00000008582	Transcript	ENSSSCT00000066035.3	protein_coding	11/12	-	1173	878	293	G/E	gGg/gAg	rs713758346	-	-1	-	-	P1	0.01	deleterious(0.01)	Expressed	1/1	1/1	1/1	1/1	1/1	0/1	0/1	0/0	0/1	0|1	0/0	1/1	1/1	0/1	0/1	1/1	0/1	0/0	0/0	0/0	0/0	0/1
AM	3	114562212	T	G	missense_variant	MODERATE	FAM228B	ENSSSCG00000008584	Transcript	ENSSSCT00000037752.2	protein_coding	7/9	-	1072	660	220	E/D	gaA/gaC	-	-	-1	HGNC	HGNC:24736	P1	0.05	tolerated(0.05)	Expressed	1/1	1/1	1/1	1/1	1/1	0/1	0/1	0/1	0|1	0/1	0/0	1/1	1/1	0/1	1/1	1/1	1/1	0/1	0/0	0/0	0/0	0/1
ML	3	117311559	C	A	missense_variant	MODERATE	APOB	ENSSSCG00000008595	Transcript	ENSSSCT00000009406.5	protein_coding	26/30	-	11084	11084	3695	S/Y	tCt/tAt	rs339032603	-	1	EntrezGene	-	-	0	deleterious(0)	Not Expressed	0/0	0/0	0/0	0/0	1/1	1/1	1/1	1/1	1/1	1/1	0/0	0/0	0/0	0/0	0/0	0/0	0/0	0/0	0/0	0/0	0/0	0/0
ML	3	117311559	C	A	missense_variant	MODERATE	APOB	ENSSSCG00000008595	Transcript	ENSSSCT00000037331.2	protein_coding	26/29	-	11304	11153	3718	S/Y	tCt/tAt	rs339032603	-	1	EntrezGene	-	P1	0	deleterious(0)	Not Expressed	0/0	0/0	0/0	0/0	1/1	1/1	1/1	1/1	1/1	1/1	0/0	0/0	0/0	0/0	0/0	0/0	0/0	0/0	0/0	0/0	0/0	0/0
ML	3	117311559	C	A	missense_variant	MODERATE	APOB	ENSSSCG00000008595	Transcript	ENSSSCT00000062425.1	protein_coding	13/16	-	9074	9074	3025	S/Y	tCt/tAt	rs339032603	-	1	EntrezGene	-	-	0	deleterious(0)	Not Expressed	0/0	0/0	0/0	0/0	1/1	1/1	1/1	1/1	1/1	1/1	0/0	0/0	0/0	0/0	0/0	0/0	0/0	0/0	0/0	0/0	0/0	0/0
ML	3	117311559	C	A	missense_variant	MODERATE	APOB	ENSSSCG00000008595	Transcript	ENSSSCT00000085003.1	protein_coding	26/29	-	11084	11084	3695	S/Y	tCt/tAt	rs339032603	-	1	EntrezGene	-	-	0	deleterious(0)	Not Expressed	0/0	0/0	0/0	0/0	1/1	1/1	1/1	1/1	1/1	1/1	0/0	0/0	0/0	0/0	0/0	0/0	0/0	0/0	0/0	0/0	0/0	0/0
AM	4	10445516	C	T	missense_variant	MODERATE	ASAP1	ENSSSCG00000028759	Transcript	ENSSSCT00000041003.2	protein_coding	27/29	-	3095	3095	1032	A/V	gCg/gTg	rs331602528	-	1	HGNC	HGNC:2720	P1	0.06	tolerated_low_confidence(0.06)	Expressed	1/1	1/1	1/1	1/1	0/0	0/0	0/0	0/0	0/0	0/0	0/0	0/1	1/1	0/0	0/0	./.	0/1	0/1	0/0	0/0	0/0	0/1
ML	4	18566963	G	T	missense_variant	MODERATE	ENSSSCG00000051469	ENSSSCG00000051469	Transcript	ENSSSCT00000082628.1	protein_coding	2/2	-	1920	109	37	V/L	Gta/Tta	rs791342511	-	1	-	-	P1	0.01	deleterious_low_confidence(0.01)	Expressed	0/0	0/1	1/1	0/1	1/1	1/1	1/1	1/1	1/1	1/1	0/0	0/0	0/0	0/0	0/0	0/0	0/0	0/0	0/0	0/0	0/0	0/0
ML	4	108922059	T	A	missense_variant	MODERATE	WDR77	ENSSSCG00000006790	Transcript	ENSSSCT00000065402.3	protein_coding	11/11	-	1207	1002	334	H/Q	caT/caA	rs338768292	-	1	HGNC	HGNC:29652	-	0.07	tolerated_low_confidence(0.07)	Expressed	0/0	0/0	0/0	0/0	1/1	1/1	1/1	1/1	1/1	1/1	0/0	0/0	0/0	0/0	0/0	0/0	0/1	0/0	0/0	0/0	0/0	0/0
ML	5	4027528	A	G	missense_variant	MODERATE	ENSSSCG00000045973	ENSSSCG00000045973	Transcript	ENSSSCT00000071620.1	protein_coding	1/2	-	92	92	31	D/G	gAt/gGt	-	-	1	-	-	P1	0.01	deleterious_low_confidence(0.01)	Expressed	0/0	0/0	0/0	0/0	1|1	1|1	1|1	1|1	1|1	1|1	0/0	0/0	0/0	0/0	0/0	0/0	0/0	0/0	0/0	0/0	0/0	0/0
ML	5	11922676	A	T	missense_variant	MODERATE	ENSSSCG00000000151	ENSSSCG00000000151	Transcript	ENSSSCT00000043062.2	protein_coding	3/4	-	606	407	136	L/H	cTc/cAc	rs340718208	-	-1	-	-	P1	0.02	deleterious(0.02)	Expressed	0/0	1|1	1|1	1|1	1|1	1|1	1|1	1|1	1|1	1|1	0/0	0/0	0/0	0/1	0/0	0|1	1|1	0/1	0/0	0/0	0/0	0|1
AM	6	152469076	T	A	missense_variant	MODERATE	CYP2J34	ENSSSCG00000056323	Transcript	ENSSSCT00000033172.4	protein_coding	1/9	-	305	194	65	L/H	cTc/cAc	-	-	1	EntrezGene	-	P1	0	deleterious(0)	Expressed	1/1	1/1	1/1	1/1	0/0	0/0	0/0	0/0	0/0	0/0	0/0	0/0	0/0	0/1	0/0	0/1	0/0	0/0	0/0	0/0	0/0	0/0
AM	7	78179484	C	T	missense_variant	MODERATE	ENSSSCG00000035377	ENSSSCG00000035377	Transcript	ENSSSCT00000053431.1	protein_coding	1/1	-	448	448	150	V/I	Gtt/Att	rs1108193794	-	-1	-	-	P1	0.02	deleterious(0.02)	Expressed	1/1	1/1	1/1	1/1	0/1	1/1	0/1	0/0	0/1	0/1	0/0	0/1	0/0	0/1	1/1	0/1	0/1	0/1	0/0	0/0	0/0	1/1
AM	7	78188998	C	T	missense_variant	MODERATE	ENSSSCG00000042755	ENSSSCG00000042755	Transcript	ENSSSCT00000084867.1	protein_coding	1/1	-	127	127	43	R/W	Cgg/Tgg	-	-	1	-	-	P1	0.09	tolerated(0.09)	Not Expressed	1/1	1/1	1/1	1/1	0/0	0/0	0/0	0/0	0/0	0/0	0/0	0/1	0/0	0/1	1/1	0/1	0/0	0/0	0/0	0/0	0/0	1/1
AM	7	97909873	G	A	missense_variant	MODERATE	AREL1	ENSSSCG00000002370	Transcript	ENSSSCT00000045456.3	protein_coding	8/21	-	1451	899	300	T/M	aCg/aTg	rs321008508	-	-1	HGNC	HGNC:20363	-	0.09	tolerated_low_confidence(0.09)	Expressed	1/1	1/1	1/1	1/1	0/1	0/1	1/1	0/1	0/1	0/1	0/0	0/1	1/1	0/1	1/1	0/0	0/1	0/1	0/0	0/0	0/0	1/1
AM	7	97909873	G	A	missense_variant	MODERATE	AREL1	ENSSSCG00000002370	Transcript	ENSSSCT00000057866.2	protein_coding	8/21	-	1435	929	310	T/M	aCg/aTg	rs321008508	-	-1	HGNC	HGNC:20363	P1	0.09	tolerated_low_confidence(0.09)	Expressed	1/1	1/1	1/1	1/1	0/1	0/1	1/1	0/1	0/1	0/1	0/0	0/1	1/1	0/1	1/1	0/0	0/1	0/1	0/0	0/0	0/0	1/1
AM	9	3319320	C	T	missense_variant	MODERATE	APBB1	ENSSSCG00000014628	Transcript	ENSSSCT00000063678.3	protein_coding	9/14	-	1947	1769	590	S/F	tCc/tTc	-	-	1	HGNC	HGNC:581	-	0	deleterious_low_confidence(0)	Expressed	1/1	1/1	1/1	1/1	0/1	0/0	./.	0/0	0/1	0/0	0/0	1/1	1/1	1/1	0/0	./.	0/0	0/0	0/0	0/0	0/0	1/1
AM	9	3319320	C	T	missense_variant	MODERATE	APBB1	ENSSSCG00000014628	Transcript	ENSSSCT00000103816.1	protein_coding	9/15	-	1947	1769	590	S/F	tCc/tTc	-	-	1	HGNC	HGNC:581	-	0	deleterious_low_confidence(0)	Expressed	1/1	1/1	1/1	1/1	0/1	0/0	./.	0/0	0/1	0/0	0/0	1/1	1/1	1/1	0/0	./.	0/0	0/0	0/0	0/0	0/0	1/1
AM	9	67650283	C	G	missense_variant	MODERATE	C1orf116	ENSSSCG00000032446	Transcript	ENSSSCT00000048897.2	protein_coding	4/5	-	1350	1167	389	Q/H	caG/caC	-	-	-1	HGNC	HGNC:28667	-	0.06	tolerated(0.06)	Expressed	1|1	1|1	1|1	1|1	0/0	0/0	0/0	0/0	0/0	0/0	0/0	0|1	1|1	0|1	0/0	0/0	0/0	0|1	0/0	0/0	0/0	0/0
AM	9	67650305	G	A	missense_variant	MODERATE	C1orf116	ENSSSCG00000032446	Transcript	ENSSSCT00000048897.2	protein_coding	4/5	-	1328	1145	382	A/V	gCc/gTc	-	-	-1	HGNC	HGNC:28667	-	0.06	tolerated(0.06)	Expressed	1|1	1|1	1|1	1|1	0/0	0/0	0/0	0/0	0/0	0/0	0/0	0|1	1|1	0|1	0/0	0/0	0/0	0|1	0/0	0/0	0/0	0/0
ML	10	57126967	T	C	missense_variant	MODERATE	PARD3	ENSSSCG00000011103	Transcript	ENSSSCT00000067441.2	protein_coding	22/25	-	3349	3313	1105	M/V	Atg/Gtg	rs792161141	-	-1	HGNC	HGNC:16051	-	0	deleterious_low_confidence(0)	Expressed	0/0	0|1	0/0	0|1	1|1	1|1	1|1	1|1	1|1	1|1	0/0	0/0	0/0	0/0	0/0	0/0	0/0	0/0	0/0	0/0	0/0	0/0
ML	10	57126967	T	C	missense_variant	MODERATE	PARD3	ENSSSCG00000011103	Transcript	ENSSSCT00000080194.2	protein_coding	19/22	-	3061	3025	1009	M/V	Atg/Gtg	rs792161141	-	-1	HGNC	HGNC:16051	-	0	deleterious_low_confidence(0)	Expressed	0/0	0|1	0/0	0|1	1|1	1|1	1|1	1|1	1|1	1|1	0/0	0/0	0/0	0/0	0/0	0/0	0/0	0/0	0/0	0/0	0/0	0/0
ML	10	57126967	T	C	missense_variant	MODERATE	PARD3	ENSSSCG00000011103	Transcript	ENSSSCT00000080812.2	protein_coding	23/26	-	3397	3361	1121	M/V	Atg/Gtg	rs792161141	-	-1	HGNC	HGNC:16051	A2	0	deleterious_low_confidence(0)	Expressed	0/0	0|1	0/0	0|1	1|1	1|1	1|1	1|1	1|1	1|1	0/0	0/0	0/0	0/0	0/0	0/0	0/0	0/0	0/0	0/0	0/0	0/0
ML	10	57126967	T	C	missense_variant	MODERATE	PARD3	ENSSSCG00000011103	Transcript	ENSSSCT00000086176.2	protein_coding	22/25	-	3286	3250	1084	M/V	Atg/Gtg	rs792161141	-	-1	HGNC	HGNC:16051	A2	0	deleterious_low_confidence(0)	Expressed	0/0	0|1	0/0	0|1	1|1	1|1	1|1	1|1	1|1	1|1	0/0	0/0	0/0	0/0	0/0	0/0	0/0	0/0	0/0	0/0	0/0	0/0
ML	10	57126967	T	C	missense_variant	MODERATE	PARD3	ENSSSCG00000011103	Transcript	ENSSSCT00000091353.2	protein_coding	21/24	-	3217	3181	1061	M/V	Atg/Gtg	rs792161141	-	-1	HGNC	HGNC:16051	-	0	deleterious_low_confidence(0)	Expressed	0/0	0|1	0/0	0|1	1|1	1|1	1|1	1|1	1|1	1|1	0/0	0/0	0/0	0/0	0/0	0/0	0/0	0/0	0/0	0/0	0/0	0/0
ML	11	74450995	C	A	missense_variant	MODERATE	ENSSSCG00000016840	ENSSSCG00000016840	Transcript	ENSSSCT00000018337.3	protein_coding	1/1	-	328	328	110	G/C	Ggc/Tgc	rs695481911	-	-1	-	-	P1	0	deleterious_low_confidence(0)	Expressed	0/1	0/0	0/0	0/0	1/1	1/1	1/1	1/1	1/1	1/1	0/0	0/0	0/0	0/0	0/0	0/1	0/0	0/0	0/0	0/0	0/0	0/0
AM	13	2087381	C	A	missense_variant	MODERATE	COL6A5	ENSSSCG00000011186	Transcript	ENSSSCT00000042220.2	protein_coding	24/28	-	5111	4912	1638	D/Y	Gat/Tat	-	-	-1	HGNC	HGNC:26674	-	0.03	deleterious(0.03)	Expressed	1/1	1|1	1/1	1/1	0/0	0/0	0/0	0/0	0/0	0/0	0/0	0/1	0/1	0/0	0/0	0/0	0/0	0/0	0/0	0/0	0/0	0/1
AM	13	2087381	C	A	missense_variant	MODERATE	COL6A5	ENSSSCG00000011186	Transcript	ENSSSCT00000058938.3	protein_coding	27/30	-	5207	5008	1670	D/Y	Gat/Tat	-	-	-1	HGNC	HGNC:26674	P1	0.03	deleterious(0.03)	Expressed	1/1	1|1	1/1	1/1	0/0	0/0	0/0	0/0	0/0	0/0	0/0	0/1	0/1	0/0	0/0	0/0	0/0	0/0	0/0	0/0	0/0	0/1
AM	13	2087381	C	A	missense_variant	MODERATE	COL6A5	ENSSSCG00000011186	Transcript	ENSSSCT00000103313.1	protein_coding	24/27	-	5111	4912	1638	D/Y	Gat/Tat	-	-	-1	HGNC	HGNC:26674	-	0.02	deleterious(0.02)	Expressed	1/1	1|1	1/1	1/1	0/0	0/0	0/0	0/0	0/0	0/0	0/0	0/1	0/1	0/0	0/0	0/0	0/0	0/0	0/0	0/0	0/0	0/1
ML	13	26259584	C	T	missense_variant	MODERATE	CCDC13	ENSSSCG00000050245	Transcript	ENSSSCT00000089400.2	protein_coding	2/18	-	573	175	59	V/I	Gtc/Atc	rs340844398	-	-1	HGNC	HGNC:26358	P1	0.01	deleterious(0.01)	Expressed	0/0	0|1	0/0	0/0	1|1	1|1	1|1	1|1	1|1	1|1	0/0	0|1	0/0	0/0	1|1	0|1	1|1	0|1	0/0	0/0	0/0	0|1
ML	13	30131767	C	T	missense_variant	MODERATE	KLHL18	ENSSSCG00000024513	Transcript	ENSSSCT00000066220.3	protein_coding	8/11	-	1224	1208	403	T/M	aCg/aTg	rs334174571	-	1	HGNC	HGNC:29120	-	0.09	tolerated(0.09)	Expressed	0/0	0/0	0/0	0/0	1/1	1/1	1/1	1/1	1/1	1/1	0/0	0/0	0/0	0/0	0/0	0/0	0/0	0/1	0/0	0/0	0/0	0/0
ML	13	46206731	C	T	missense_variant	MODERATE	ADAMTS9	ENSSSCG00000011496	Transcript	ENSSSCT00000012579.5	protein_coding	1/40	-	276	211	71	A/T	Gcc/Acc	-	-	-1	HGNC	HGNC:13202	-	0	deleterious_low_confidence(0)	Expressed	0/0	0/0	0/0	0/0	1/1	1/1	./.	./.	1/1	1/1	0/0	0/0	0/0	0/0	0/0	0/0	./.	./.	0/0	0/0	0/0	0/1
ML	13	46206731	C	T	missense_variant	MODERATE	ADAMTS9	ENSSSCG00000011496	Transcript	ENSSSCT00000055973.3	protein_coding	1/41	-	276	211	71	A/T	Gcc/Acc	-	-	-1	HGNC	HGNC:13202	P1	0	deleterious_low_confidence(0)	Expressed	0/0	0/0	0/0	0/0	1/1	1/1	./.	./.	1/1	1/1	0/0	0/0	0/0	0/0	0/0	0/0	./.	./.	0/0	0/0	0/0	0/1
ML	13	67585982	A	C	missense_variant,splice_region_variant	MODERATE	ATG7	ENSSSCG00000011575	Transcript	ENSSSCT00000054142.2	protein_coding	19/20	-	2172	2031	677	E/D	gaA/gaC	rs705359198	-	1	HGNC	HGNC:16935	-	0.09	tolerated(0.09)	Expressed	1/1	0/0	0/1	0/1	1/1	1/1	1/1	1/1	1/1	1/1	0/0	0/1	1/1	0/0	0/0	0/0	0/0	0/0	0/0	0/0	0/0	0/0
AM	13	82191379	A	C	missense_variant	MODERATE	ZBTB38	ENSSSCG00000022073	Transcript	ENSSSCT00000025924.3	protein_coding	2/2	-	2776	2641	881	S/R	Agt/Cgt	-	-	1	HGNC	HGNC:26636	P1	0.09	tolerated(0.09)	Expressed	1/1	1/1	1/1	1/1	0/0	0/0	0/0	0/0	0/0	0/0	0/0	1/1	1/1	0/0	0/0	0/1	1/1	0/1	0/0	0/0	0/0	0/0
AM	13	82191379	A	C	missense_variant	MODERATE	ZBTB38	ENSSSCG00000022073	Transcript	ENSSSCT00000049108.2	protein_coding	5/5	-	3136	2641	881	S/R	Agt/Cgt	-	-	1	HGNC	HGNC:26636	P1	0.09	tolerated(0.09)	Expressed	1/1	1/1	1/1	1/1	0/0	0/0	0/0	0/0	0/0	0/0	0/0	1/1	1/1	0/0	0/0	0/1	1/1	0/1	0/0	0/0	0/0	0/0
AM	13	82191379	A	C	missense_variant	MODERATE	ZBTB38	ENSSSCG00000022073	Transcript	ENSSSCT00000049277.3	protein_coding	5/5	-	3424	2641	881	S/R	Agt/Cgt	-	-	1	HGNC	HGNC:26636	P1	0.09	tolerated(0.09)	Expressed	1/1	1/1	1/1	1/1	0/0	0/0	0/0	0/0	0/0	0/0	0/0	1/1	1/1	0/0	0/0	0/1	1/1	0/1	0/0	0/0	0/0	0/0
AM	13	82191379	A	C	missense_variant	MODERATE	ZBTB38	ENSSSCG00000022073	Transcript	ENSSSCT00000060641.2	protein_coding	7/7	-	3586	2641	881	S/R	Agt/Cgt	-	-	1	HGNC	HGNC:26636	P1	0.09	tolerated(0.09)	Expressed	1/1	1/1	1/1	1/1	0/0	0/0	0/0	0/0	0/0	0/0	0/0	1/1	1/1	0/0	0/0	0/1	1/1	0/1	0/0	0/0	0/0	0/0
AM	13	82191379	A	C	missense_variant	MODERATE	ZBTB38	ENSSSCG00000022073	Transcript	ENSSSCT00000066762.2	protein_coding	3/3	-	2824	2641	881	S/R	Agt/Cgt	-	-	1	HGNC	HGNC:26636	P1	0.09	tolerated(0.09)	Expressed	1/1	1/1	1/1	1/1	0/0	0/0	0/0	0/0	0/0	0/0	0/0	1/1	1/1	0/0	0/0	0/1	1/1	0/1	0/0	0/0	0/0	0/0
ML	13	95888776	C	T	missense_variant	MODERATE	ENSSSCG00000011724	ENSSSCG00000011724	Transcript	ENSSSCT00000012834.3	protein_coding	7/11	-	1091	1091	364	T/I	aCa/aTa	rs699487149	-	1	-	-	P1	0	deleterious(0)	Expressed	0/0	0/0	0/0	0/0	1/1	1/1	1/1	1/1	1/1	1/1	0/0	0/0	0/0	0/0	0/0	0/0	0/0	0/0	0/0	0/0	0/0	0/0
ML	13	95903663	G	A	missense_variant	MODERATE	ENSSSCG00000011724	ENSSSCG00000011724	Transcript	ENSSSCT00000012834.3	protein_coding	11/11	-	2339	2339	780	C/Y	tGc/tAc	rs333810224	-	1	-	-	P1	0	deleterious(0)	Expressed	0/1	0/1	0/1	0/1	1/1	1/1	1/1	1/1	1/1	1/1	0/0	0/0	1/1	0/1	0/0	1/1	0/0	1/1	0/0	0/0	0/0	0/1
ML	13	125110845	G	A	missense_variant	MODERATE	ENSSSCG00000059088	ENSSSCG00000059088	Transcript	ENSSSCT00000092554.1	protein_coding	1/1	-	3870	432	144	M/I	atG/atA	-	-	1	-	-	P1	0.07	tolerated_low_confidence(0.07)	Expressed	0/1	0/1	0/0	0/1	1/1	1/1	1/1	1/1	1/1	1/1	0/0	0/0	0/0	0/0	0/0	1/1	0/0	1/1	0/0	0/0	0/0	0/0
AM	13	139985210	T	A	missense_variant	MODERATE	ENSSSCG00000059521	ENSSSCG00000059521	Transcript	ENSSSCT00000093199.1	protein_coding	2/2	-	387	387	129	K/N	aaA/aaT	rs700125547	-	-1	-	-	P1	0	deleterious_low_confidence(0)	Expressed	1|1	1|1	1|1	1|1	0/0	0/0	0|1	0/0	0/0	0/0	0|0	1|1	0/0	0/0	1|1	0|1	1|1	1|1	0|1	0|1	0|1	1|1
AM	13	139985233	C	A	missense_variant	MODERATE	ENSSSCG00000059521	ENSSSCG00000059521	Transcript	ENSSSCT00000093199.1	protein_coding	2/2	-	364	364	122	V/F	Gtc/Ttc	rs338695939	-	-1	-	-	P1	0.03	deleterious_low_confidence(0.03)	Expressed	1|1	1|1	1|1	1|1	0/0	0/0	0|1	0/0	0/0	0/0	0|0	1|1	0/0	0/0	1|1	0|1	1|1	1|1	0|1	0|1	0|1	1|1
ML	13	196044401	T	C	missense_variant	MODERATE	URB1	ENSSSCG00000032024	Transcript	ENSSSCT00000065066.2	protein_coding	2/41	-	307	185	62	E/G	gAg/gGg	-	-	-1	HGNC	HGNC:17344	P1	0.02	deleterious(0.02)	Expressed	0/0	0/0	0/0	0/0	1/1	1/1	1/1	1/1	1/1	1|1	0/0	0/0	0/0	0/0	0/0	0/0	0/0	0/1	0/0	0/0	0/0	0/0
ML	13	196232434	G	A	missense_variant	MODERATE	SYNJ1	ENSSSCG00000012035	Transcript	ENSSSCT00000060074.2	protein_coding	31/31	-	4825	4655	1552	S/L	tCa/tTa	rs787499373	-	-1	HGNC	HGNC:11503	A2	0	deleterious_low_confidence(0)	Expressed	0/0	0/0	0/0	0/0	1/1	1/1	1/1	1/1	1/1	1/1	0/0	0/0	0/0	0/0	0/0	0/0	0/0	0/0	0/0	0/0	0/0	0/0
ML	13	196232434	G	A	missense_variant	MODERATE	SYNJ1	ENSSSCG00000012035	Transcript	ENSSSCT00000092982.1	protein_coding	30/30	-	4816	4646	1549	S/L	tCa/tTa	rs787499373	-	-1	HGNC	HGNC:11503	A2	0	deleterious_low_confidence(0)	Expressed	0/0	0/0	0/0	0/0	1/1	1/1	1/1	1/1	1/1	1/1	0/0	0/0	0/0	0/0	0/0	0/0	0/0	0/0	0/0	0/0	0/0	0/0
ML	13	196239752	C	A	missense_variant	MODERATE	SYNJ1	ENSSSCG00000012035	Transcript	ENSSSCT00000071315.2	protein_coding	29/30	-	4085	3911	1304	R/L	cGg/cTg	-	-	-1	HGNC	HGNC:11503	A2	0	deleterious_low_confidence(0)	Expressed	0/0	0/0	0/0	0/0	1/1	1/1	1/1	1/1	1/1	1/1	0/0	0/0	0/0	0/0	0/0	0/0	0/0	0/0	0/0	0/0	0/0	0/0
ML	13	196239752	C	A	missense_variant	MODERATE	SYNJ1	ENSSSCG00000012035	Transcript	ENSSSCT00000094870.1	protein_coding	28/29	-	4052	3878	1293	R/L	cGg/cTg	-	-	-1	HGNC	HGNC:11503	A2	0	deleterious_low_confidence(0)	Expressed	0/0	0/0	0/0	0/0	1/1	1/1	1/1	1/1	1/1	1/1	0/0	0/0	0/0	0/0	0/0	0/0	0/0	0/0	0/0	0/0	0/0	0/0
ML	13	196387879	C	T	missense_variant	MODERATE	C21orf62	ENSSSCG00000012038	Transcript	ENSSSCT00000065624.3	protein_coding	2/2	-	526	377	126	R/H	cGc/cAc	rs701386409	-	-1	HGNC	HGNC:1305	P1	0.08	tolerated(0.08)	Expressed	0/0	0/0	0/1	0/0	1/1	1/1	1/1	1/1	1/1	1/1	0/0	0/0	0/0	1/1	1/1	0/0	0/0	0/0	0/0	0/0	0/0	0/0
ML	13	196387879	C	T	missense_variant	MODERATE	C21orf62	ENSSSCG00000012038	Transcript	ENSSSCT00000104866.1	protein_coding	2/2	-	637	377	126	R/H	cGc/cAc	rs701386409	-	-1	HGNC	HGNC:1305	P1	0.08	tolerated(0.08)	Expressed	0/0	0/0	0/1	0/0	1/1	1/1	1/1	1/1	1/1	1/1	0/0	0/0	0/0	1/1	1/1	0/0	0/0	0/0	0/0	0/0	0/0	0/0
ML	13	198334828	T	C	missense_variant	MODERATE	ENSSSCG00000012052	ENSSSCG00000012052	Transcript	ENSSSCT00000061685.1	protein_coding	3/4	-	386	386	129	K/R	aAg/aGg	rs337629372	-	-1	-	-	P1	0.04	deleterious_low_confidence(0.04)	Expressed	0|1	0/0	0/0	0/0	1|1	1|1	1|1	1|1	1|1	1|1	0/0	0/0	0/0	1|1	0/0	0/0	0/0	0/0	0/0	0/0	0/0	0/0
ML	13	198335177	C	G	missense_variant	MODERATE	ENSSSCG00000012052	ENSSSCG00000012052	Transcript	ENSSSCT00000061685.1	protein_coding	1/4	-	156	156	52	Q/H	caG/caC	rs713537385	-	-1	-	-	P1	0.06	tolerated(0.06)	Expressed	0/1	0/0	0/0	0/0	1/1	1/1	1/1	1/1	1/1	1/1	0/0	0/0	0/0	0/1	0/0	0/0	0/0	0/0	0/0	0/0	0/0	0/0
AM	14	124158042	C	T	missense_variant	MODERATE	DCLRE1A	ENSSSCG00000010644	Transcript	ENSSSCT00000011643.5	protein_coding	4/11	-	943	943	315	D/N	Gat/Aat	rs707801841	-	-1	HGNC	HGNC:17660	P4	0.09	tolerated(0.09)	Expressed	1/1	1/1	1/1	1/1	0/1	1/1	1/1	1/1	1/1	1/1	0/0	0/1	0/0	0/0	1/1	0/0	0/1	0/1	0/0	0/1	0/1	1/1
AM	14	124158042	C	T	missense_variant	MODERATE	DCLRE1A	ENSSSCG00000010644	Transcript	ENSSSCT00000096676.1	protein_coding	3/11	-	1909	1000	334	D/N	Gat/Aat	rs707801841	-	-1	HGNC	HGNC:17660	A2	0.1	tolerated(0.1)	Expressed	1/1	1/1	1/1	1/1	0/1	1/1	1/1	1/1	1/1	1/1	0/0	0/1	0/0	0/0	1/1	0/0	0/1	0/1	0/0	0/1	0/1	1/1
ML	15	139458278	G	T	missense_variant	MODERATE	GPC1	ENSSSCG00000016364	Transcript	ENSSSCT00000060487.3	protein_coding	2/10	-	182	86	29	S/I	aGt/aTt	-	-	1	HGNC	HGNC:4449	P1	0.01	deleterious(0.01)	Expressed	0/0	0/0	0/0	0/0	1/1	1/1	./.	./.	1/1	1/1	0/0	0/0	0/0	0/0	0/0	./.	0/0	./.	0/0	0/0	0/0	0/0
ML	15	139615503	G	A	missense_variant	MODERATE	KIF1A	ENSSSCG00000016401	Transcript	ENSSSCT00000017858.5	protein_coding	47/50	-	5036	4871	1624	P/L	cCg/cTg	-	-	-1	HGNC	HGNC:888	A2	0	deleterious_low_confidence(0)	Expressed	0/0	0/0	0/0	0/0	1/1	1/1	./.	./.	1/1	1/1	0/0	0/0	0/0	0/0	0/0	0/0	0/0	./.	0/0	0/0	0/0	0/0
ML	15	139615503	G	A	missense_variant	MODERATE	KIF1A	ENSSSCG00000016401	Transcript	ENSSSCT00000066907.2	protein_coding	48/51	-	5060	4895	1632	P/L	cCg/cTg	-	-	-1	HGNC	HGNC:888	-	0	deleterious_low_confidence(0)	Expressed	0/0	0/0	0/0	0/0	1/1	1/1	./.	./.	1/1	1/1	0/0	0/0	0/0	0/0	0/0	0/0	0/0	./.	0/0	0/0	0/0	0/0
ML	15	139615503	G	A	missense_variant	MODERATE	KIF1A	ENSSSCG00000016401	Transcript	ENSSSCT00000067087.2	protein_coding	46/51	-	5014	4844	1615	P/L	cCg/cTg	-	-	-1	HGNC	HGNC:888	-	0	deleterious_low_confidence(0)	Expressed	0/0	0/0	0/0	0/0	1/1	1/1	./.	./.	1/1	1/1	0/0	0/0	0/0	0/0	0/0	0/0	0/0	./.	0/0	0/0	0/0	0/0
ML	15	139615503	G	A	missense_variant	MODERATE	KIF1A	ENSSSCG00000016401	Transcript	ENSSSCT00000072253.2	protein_coding	47/52	-	4786	4637	1546	P/L	cCg/cTg	-	-	-1	HGNC	HGNC:888	A1	0	deleterious_low_confidence(0)	Expressed	0/0	0/0	0/0	0/0	1/1	1/1	./.	./.	1/1	1/1	0/0	0/0	0/0	0/0	0/0	0/0	0/0	./.	0/0	0/0	0/0	0/0
ML	15	139615503	G	A	missense_variant	MODERATE	KIF1A	ENSSSCG00000016401	Transcript	ENSSSCT00000088069.2	protein_coding	46/50	-	4778	4610	1537	P/L	cCg/cTg	-	-	-1	HGNC	HGNC:888	P4	0	deleterious_low_confidence(0)	Expressed	0/0	0/0	0/0	0/0	1/1	1/1	./.	./.	1/1	1/1	0/0	0/0	0/0	0/0	0/0	0/0	0/0	./.	0/0	0/0	0/0	0/0
ML	17	22419559	A	G	missense_variant	MODERATE	ESF1	ENSSSCG00000007077	Transcript	ENSSSCT00000007748.4	protein_coding	14/14	-	2502	2432	811	L/P	cTt/cCt	rs706438184	-	-1	HGNC	HGNC:15898	P1	0.08	tolerated(0.08)	Expressed	0/1	0/1	0/0	0/0	1/1	1/1	1/1	1/1	1/1	1/1	0/0	0/0	0/0	0/0	0/0	0/1	0/0	0/0	0/0	0/0	0/0	0/0
ML	17	22471174	C	T	missense_variant	MODERATE	ESF1	ENSSSCG00000007077	Transcript	ENSSSCT00000007748.4	protein_coding	3/14	-	1110	1040	347	R/Q	cGg/cAg	rs328706689	-	-1	HGNC	HGNC:15898	P1	0.05	deleterious(0.05)	Expressed	1/1	1/1	0/0	0/1	1/1	1/1	1/1	1/1	1|1	1/1	0/0	0/1	0/1	0/0	0/0	0/0	0/0	0/0	0/0	0/0	0/0	0/1
[truncated: 11 more columns]

## Sheet: Non-coding candidate SNVs
	Candidate variant information					ATAC-peak statistics and gABC model											Gene assigned to variant by gABC model					Transcriptome profile								Alleles		Genotypes ('1/1'=alt, '0/1'=heterozygous, '0/0'=ref)
Minipig, in which a ROHR was overlapping with candidate variant	Type	Caller	Chromosome	Start	End	ATAC-peak ID overlapping with variant	Peak chr	Peak start	Peak end	signal value	Contact	adapted activity	scaled contact	intergenic score	TSS dist	ABC score	Gene chr	Gene start (bp)	Gene end (bp)	Ensembl gene ID of assigned gene	Gene name	L2FC_AMvsAS	pvalue_AMvsAS	L2FC_AMvsMA	pvalue_AMvsMA	L2FC_MLvsMA	pvalue_MLvsMA	L2FC_MLvsAS	pvalue_MLvsAS	Ref	Alt	NGSPIG028 AM	NGSPIG029 AM	NGSPIG030 AM	NGSPIG031 AM	NGSPIG010 ML	NGSPIG032 ML	NGSPIG041 ML	NGSPIG042 ML	NGSPIG062 ML	NGSPIG063 ML	NGSPIG003 KK	NGSPIG009 MN	NGSPIG023 MN	NGSPIG036 MN	NGSPIG021 MN	NGSPIG014 GT	NGSPIG037 GT	NGSPIG038 GT
AM	SNV	GATK	1	65848899	65848899	1:65848590-65849090	1	65848590	65849090	101.667	1.51646	2.46838	46.4811	2.46838	374691	0.0554565	1	66223781	66229259	ENSSSCG00000057553	ENSSSCG00000057553	13.8589	0.00457399	13.3926	0.0125603	19.1625	1.31465e-05	19.6288	2.16579e-06	G	A	1/1	1/1	1/1	1/1	0|1	1/1	0/0	0/0	0/1	1/1	0/0	0/0	0/0	0/1	1/1	./.	0/0	0/0
AM	SNV	GATK	3	3150259	3150259	3:3149856-3150356	3	3149856	3150356	109.833	2.77868	6.85761	61.0151	6.85761	401959	0.0311438	3	2747898	2751387	ENSSSCG00000055080	ENSSSCG00000055080	-21.4319	9.00465e-06	-26.581	5.25807e-07	-39.4541	1.48011e-19	-34.305	1.15291e-16	G	A	1/1	1/1	1/1	1/1	0/0	0/0	0/0	0/0	0/0	0/0	1/1	0/1	0/0	0/1	0/0	0/1	0/0	./.
AM	SNV	GATK	3	111732950	111732950	3:111732814-111733314	3	111732814	111733314	62733301	1893532	31502519	29934758	31502519	137383	0.069460003	3	111870681	111879324	ENSSSCG00000021534	SLC30A3	-3.2844	0.0332302	-2.99573	0.0753636	0.405472	0.745429	0.116806	0.919797	C	T	1/1	1/1	1/1	1/1	0/0	0/0	0/0	0/0	0/0	0/0	0/0	0/1	1/1	0/1	0/1	./.	0/0	0/0
AM	SNV	GATK	3	117806748	117806748	3:117806584-117807084	3	117806584	117807084	90.1667	29.5189	27.0363	84.7588	27.0363	4701	0.122913	3	117810941	117811785	ENSSSCG00000054581	ENSSSCG00000054581	3.39656	0.041532	0.456223	0.787051	-1.78826	0.211989	1.15208	0.45294	G	A	1/1	1/1	1/1	1/1	1/1	1/1	0/1	0/0	1/1	1/1	0/0	0/1	1/1	0/0	0/1	0/1	1/1	./.
AM	SNV	GATK	4	75761930	75761930	4:75761858-75762358	4	75761858	75762358	234.667	29.2757	40.9868	100	40.9868	477	0.813756	4	75750579	75761382	ENSSSCG00000048200	ENSSSCG00000048200	-4.8488	0.00729314	-4.95778	0.0126897	-2.04454	0.209734	-1.93556	0.205668	C	G	1/1	1/1	1/1	1/1	1/1	0/1	0/1	0/1	1/1	1/1	0/1	1/1	1/1	0/1	0/1	0/0	0/0	0/1
AM	SNV	GATK	4	75761951	75761951	4:75761858-75762358	4	75761858	75762358	234.667	29.2757	40.9868	100	40.9868	477	0.813756	4	75750579	75761382	ENSSSCG00000048200	ENSSSCG00000048200	-4.8488	0.00729314	-4.95778	0.0126897	-2.04454	0.209734	-1.93556	0.205668	C	T	1/1	1/1	1/1	1/1	1/1	0/1	1/1	0/1	1/1	1/1	0/1	1/1	1/1	1/1	0/1	0|1	0/0	1/1
AM	SNV	GATK	4	75761966	75761966	4:75761858-75762358	4	75761858	75762358	234.667	29.2757	40.9868	100	40.9868	477	0.813756	4	75750579	75761382	ENSSSCG00000048200	ENSSSCG00000048200	-4.8488	0.00729314	-4.95778	0.0126897	-2.04454	0.209734	-1.93556	0.205668	G	A	1/1	1/1	1/1	1/1	1/1	0/1	1/1	0/1	1/1	1/1	0/1	1/1	1/1	0/1	0/1	0/1	0/0	0/1
AM	SNV	GATK	4	75762078	75762078	4:75761858-75762358	4	75761858	75762358	234.667	29.2757	40.9868	100	40.9868	477	0.813756	4	75750579	75761382	ENSSSCG00000048200	ENSSSCG00000048200	-4.8488	0.00729314	-4.95778	0.0126897	-2.04454	0.209734	-1.93556	0.205668	C	T	1/1	1/1	1/1	1/1	1/1	0/1	1/1	0/1	1/1	1/1	0/1	1/1	1/1	0/1	0/1	0/1	1/1	0/0
AM	SNV	GATK	9	2191270	2191270	9:2191162-2191662	9	2191162	2191662	88.3333	6.73147	5.65688	38.6504	5.65688	598640	0.0210011	9	2789370	2790302	ENSSSCG00000057645	ENSSSCG00000057645	-19.4711	5.46786e-05	0	1	24.9775	1.467e-08	-4.24553	0.302248	T	C	1|1	1|1	1|1	1|1	0/0	0/0	0/0	0/0	0/0	0/0	0/0	1|1	1|1	0|1	0|1	0/0	0/0	0/0
AM	SNV	GATK	9	2191272	2191272	9:2191162-2191662	9	2191162	2191662	88.3333	6.73147	5.65688	38.6504	5.65688	598640	0.0210011	9	2789370	2790302	ENSSSCG00000057645	ENSSSCG00000057645	-19.4711	5.46786e-05	0	1	24.9775	1.467e-08	-4.24553	0.302248	A	C	1|1	1|1	1|1	1|1	0/0	0/0	0/0	0/0	0/0	0/0	0/0	1|1	1|1	0|1	0|1	0/0	0/0	0/0
AM	SNV	GATK	9	3316764	3316764	9:3316355-3316855	9	3316355	3316855	147.5	11.9125	5.60291	34.9824	5.60291	28155	0.026324	9	3288172	3297047	ENSSSCG00000014626	HPX	-3.30701	0.0483024	-3.75077	0.0379309	-1.84998	0.197366	-1.40622	0.306027	A	G	1/1	1/1	1/1	1/1	0/1	0/0	0/0	0/1	0/1	0/0	0/0	1/1	1/1	1/1	0/0	0/0	0/0	0/0
AM	SNV	GATK	9	3316790	3316790	9:3316355-3316855	9	3316355	3316855	147.5	11.9125	5.60291	34.9824	5.60291	28155	0.026324	9	3288172	3297047	ENSSSCG00000014626	HPX	-3.30701	0.0483024	-3.75077	0.0379309	-1.84998	0.197366	-1.40622	0.306027	C	T	1/1	1/1	1/1	1/1	0/1	0/0	0/0	0/1	0/1	0/0	0/0	1/1	1/1	1/1	0/0	0/0	0/0	0/0
AM	SNV	GATK	9	45393745	45393745	9:45393439-45393939	9	45393439	45393939	86.5	20.0589	11.5675	43.0406	11.5675	6661	0.020802	9	45400600	45435916	ENSSSCG00000015086	TMPRSS4	0.390414	0.756013	2.87936	0.0485242	1.11453	0.344437	-1.37442	0.191761	C	T	1|1	1|1	1|1	1|1	0/0	0/0	0/0	0/0	0/0	0/0	0/0	0/1	0/1	1|1	1|1	0|1	0/0	0/0
AM	SNV	GATK	9	45393860	45393860	9:45393439-45393939	9	45393439	45393939	86.5	20.0589	11.5675	43.0406	11.5675	6661	0.020802	9	45400600	45435916	ENSSSCG00000015086	TMPRSS4	0.390414	0.756013	2.87936	0.0485242	1.11453	0.344437	-1.37442	0.191761	G	A	1|1	1|1	1|1	1|1	0/0	0/0	0/0	0/0	0/0	0/0	0/0	0|1	0|1	1|1	1|1	0/0	0|1	0/0
AM	SNV	GATK	9	45393878	45393878	9:45393439-45393939	9	45393439	45393939	86.5	20.0589	11.5675	43.0406	11.5675	6661	0.020802	9	45400600	45435916	ENSSSCG00000015086	TMPRSS4	0.390414	0.756013	2.87936	0.0485242	1.11453	0.344437	-1.37442	0.191761	C	T	1|1	1|1	1|1	1|1	0/0	0/0	0/0	0/0	0/0	0/0	0/0	0|1	0|1	1|1	1|1	0/0	0|1	0/0
AM	SNV	GATK	13	2140379	2140379	13:2140335-2140835	13	2140335	2140835	80.8333	4.26802	3.36235	83.1813	3.36235	154537	0.0395835	13	1817406	1985799	ENSSSCG00000037430	COL6A6	2.08096	0.35265	5.11633	0.042604	2.15425	0.287748	-0.881129	0.638988	G	C	1|1	1|1	1|1	1|1	0/0	0/0	0/0	0/0	0/0	0/0	0/0	0|1	0|1	0/0	0/0	0/0	0/0	./.
AM	SNV	GATK	13	2140380	2140380	13:2140335-2140835	13	2140335	2140835	80.8333	4.26802	3.36235	83.1813	3.36235	154537	0.0395835	13	1817406	1985799	ENSSSCG00000037430	COL6A6	2.08096	0.35265	5.11633	0.042604	2.15425	0.287748	-0.881129	0.638988	G	A	1|1	1|1	1|1	1|1	0/0	0/0	0/0	0/0	0/0	0/0	0/0	0|1	0|1	0/0	0/0	0/0	0/0	./.
AM	SNV	GATK	13	2140453	2140453	13:2140335-2140835	13	2140335	2140835	80.8333	4.26802	3.36235	83.1813	3.36235	154537	0.0395835	13	1817406	1985799	ENSSSCG00000037430	COL6A6	2.08096	0.35265	5.11633	0.042604	2.15425	0.287748	-0.881129	0.638988	C	G	1/1	1/1	1/1	1/1	0/0	0/0	0/0	0/0	0/0	0/0	0/0	0/1	0/1	0/0	0/0	0/0	0/0	0/0
AM	SNV	GATK	13	2140681	2140681	13:2140335-2140835	13	2140335	2140835	80.8333	4.26802	3.36235	83.1813	3.36235	154537	0.0395835	13	1817406	1985799	ENSSSCG00000037430	COL6A6	2.08096	0.35265	5.11633	0.042604	2.15425	0.287748	-0.881129	0.638988	TC	T	1|1	1|1	1|1	1|1	0/0	0/0	0/0	0/0	0/0	0/0	0/0	0|1	0|1	0/0	0/0	0/0	0/0	0/0
AM	SNV	GATK	13	2140694	2140694	13:2140335-2140835	13	2140335	2140835	80.8333	4.26802	3.36235	83.1813	3.36235	154537	0.0395835	13	1817406	1985799	ENSSSCG00000037430	COL6A6	2.08096	0.35265	5.11633	0.042604	2.15425	0.287748	-0.881129	0.638988	C	T	1|1	1|1	1|1	1|1	0/0	0/0	0/0	0/0	0/0	0/0	0/0	0|1	0|1	0/0	0/0	0/0	0/0	0/0
AM	SNV	GATK	13	182228253	182228253	13:182227765-182228265	13	182227765	182228265	356.333	3.272	10.0756	68.0312	10.0756	1093805	0.42686	13	181133961	181136736	ENSSSCG00000062883	ENSSSCG00000062883	-1.87965	0.20562	-3.52777	0.028644	-2.89201	0.0299247	-1.24389	0.337995	C	G	1/1	1/1	1/1	1/1	0/0	0/0	0/0	0/0	0/0	0/0	0/0	0/1	0/0	0/1	0/0	0/0	0/0	./.
AM	SNV	GATK	14	130691674	130691674	14:130691633-130692133	14	130691633	130692133	135.333	6.04931	14.1417	66.5932	14.1417	859051	0.094117	14	131487780	131551184	ENSSSCG00000057767	ENSSSCG00000057767	-16.1018	0.000163467	-12.6846	0.0071871	2.65833	0.489926	-0.758798	0.832254	G	GCAAGGATGGA	1/1	1/1	1/1	1/1	0/1	0/1	0/0	1/1	0/1	0/1	0/0	1/1	1/1	1/1	1/1	1/1	0/1	1/1
AM	SNV	GATK	14	130691997	130691997	14:130691633-130692133	14	130691633	130692133	135.333	6.04931	14.1417	66.5932	14.1417	859051	0.094117	14	131487780	131551184	ENSSSCG00000057767	ENSSSCG00000057767	-16.1018	0.000163467	-12.6846	0.0071871	2.65833	0.489926	-0.758798	0.832254	C	T	1|1	1|1	1|1	1|1	0|1	0|1	0|1	1|1	0|1	0|1	0/0	1|1	1|1	1|1	1|1	1|1	0|1	0|1
ML	SNV	GATK	3	94216314	94216314	3:94216247-94216747	3	94216247	94216747	81.1667	24.3641	18.7267	43.7405	18.7267	37597	0.0469067	3	94254344	94257679	ENSSSCG00000056286	ENSSSCG00000056286	1.83771	0.171926	1.06511	0.442857	2.04293	0.0647616	2.81553	0.0131167	C	T	0/0	0/0	0|1	0|1	1|1	1|1	1|1	1|1	1|1	1|1	0/0	0/0	1|1	0|1	1|1	0/0	0|1	0/0
ML	SNV	GATK	3	94216609	94216609	3:94216247-94216747	3	94216247	94216747	81.1667	24.3641	18.7267	43.7405	18.7267	37597	0.0469067	3	94254344	94257679	ENSSSCG00000056286	ENSSSCG00000056286	1.83771	0.171926	1.06511	0.442857	2.04293	0.0647616	2.81553	0.0131167	C	T	0/0	0/0	0/1	0/1	1/1	1/1	1/1	1/1	1/1	1/1	0/0	0/0	1/1	0/1	1/1	0/0	0/1	0/0
ML	SNV	GATK	3	94216655	94216655	3:94216247-94216747	3	94216247	94216747	81.1667	24.3641	18.7267	43.7405	18.7267	37597	0.0469067	3	94254344	94257679	ENSSSCG00000056286	ENSSSCG00000056286	1.83771	0.171926	1.06511	0.442857	2.04293	0.0647616	2.81553	0.0131167	C	T	0/0	0/0	0/1	0/1	1/1	1/1	1/1	1/1	1/1	1/1	0/0	0/0	1/1	0/1	1/1	1/1	0/1	0/1
ML	SNV	GATK	6	75929178	75929178	6:75929161-75929661	6	75929161	75929661	74.8333	10.2689	10.5336	41.3915	10.5336	6228	0.0449694	6	75935889	75966293	ENSSSCG00000003483	PADI4	0.0799229	0.954919	2.0035	0.196945	-1.32417	0.297804	-3.24775	0.00681666	C	G	1/1	0/1	0/1	0/1	1/1	1/1	1/1	1/1	1/1	1/1	0/0	0/0	0/0	0/0	0/0	0/0	0/0	0/0
ML	SNV	GATK	9	65950714	65950714	9:65950281-65950781	9	65950281	65950781	80.5	28.1957	14.0328	96.1845	14.0328	3799	0.0740332	9	65946483	65947105	ENSSSCG00000047928	ENSSSCG00000047928	-0.117507	0.913698	0.931609	0.437113	-1.7768	0.0779277	-2.82592	0.00283302	T	TGTGGCGTAGGTGGCAGATGCGGCTCAGATCCCGCGTTGCTGTGGCC	0/0	0/0	0/0	0/0	1|1	1|1	./.	1|1	1|1	1|1	0/0	0/0	0/0	0/0	0/0	0/0	0/0	0/0
ML	SNV	GATK	13	7008789	7008789	13:7008609-7009109	13	7008609	7009109	59.3333	4.10975	6.46173	22.5918	6.46173	46800	0.0222155	13	6939517	6961810	ENSSSCG00000027327	PP2D1	-0.647107	0.543613	0.998184	0.43152	-0.563765	0.601104	-2.20906	0.0196836	A	G	0/0	0/0	0/0	0/0	1|1	1|1	1|1	1|1	1|1	1|1	0/0	0/0	0/0	1|1	0|1	0/0	0/0	0/0
ML	SNV	GATK	13	7047051	7047051	13:7047019-7047519	13	7047019	7047519	87.1667	2.31525	7.24565	43.0853	7.24565	66458	0.0598139	13	7113977	7118730	ENSSSCG00000054438	ENSSSCG00000054438	-0.17323	0.900276	1.95029	0.239467	-2.04106	0.174998	-4.16458	0.00176535	G	GGTAGT	0/1	0/1	0/1	0/0	1/1	1/1	1/1	1/1	1/1	1/1	0/0	0/0	0/1	1/1	0/1	1/1	1/1	1/1
ML	SNV	GATK	13	29430564	29430564	13:29430398-29430898	13	29430398	29430898	80.1667	11.3119	5.72276	40.0777	5.72276	14155	0.0467203	13	29413886	29445739	ENSSSCG00000029879	LTF	0.175885	0.899521	2.26209	0.13919	-0.737069	0.556297	-2.82327	0.0169578	T	C	0/1	0/1	1/1	0/1	1|1	1|1	1|1	1|1	1|1	1|1	0/0	0|1	0/1	1/1	0/1	0|0	1|1	0/0
ML	SNV	GATK	13	29438871	29438871	13:29438632-29439132	13	29438632	29439132	76.8333	25.6979	9.99621	91.0474	9.99621	5921	0.195856	13	29413886	29445739	ENSSSCG00000029879	LTF	0.175885	0.899521	2.26209	0.13919	-0.737069	0.556297	-2.82327	0.0169578	C	T	0/0	0/0	0/0	0/0	1/1	1/1	1/1	1/1	1/1	1/1	0/0	0/0	0/0	0/0	0/0	0/1	0/0	0/0
ML	SNV	GATK	13	29438984	29438984	13:29438632-29439132	13	29438632	29439132	76.8333	25.6979	9.99621	91.0474	9.99621	5921	0.195856	13	29413886	29445739	ENSSSCG00000029879	LTF	0.175885	0.899521	2.26209	0.13919	-0.737069	0.556297	-2.82327	0.0169578	G	A	0/0	0/0	0/0	0/0	1/1	1/1	1/1	1/1	1/1	1/1	0/0	0/0	0/0	0/0	0/0	0/1	0/0	0/0
ML	SNV	GATK	18	5888266	5888266	18:5888150-5888650	18	5888150	5888650	15316701	16936695	23202966	44711026	23202966	1358457	0.025476825	18	4474494	4529772	ENSSSCG00000042794	ENSSSCG00000042794	-19.14	8.42643e-05	0	1	0	1	-21.5273	2.14945e-07	CG	C	0/0	0/0	0/0	0/0	1/1	1/1	./.	./.	1/1	1/1	0/0	0/0	0/0	0/0	0/0	./.	0/0	./.
ML	SNV	GATK	18	5888414	5888414	18:5888150-5888650	18	5888150	5888650	15316701	16936695	23202966	44711026	23202966	1358457	0.025476825	18	4474494	4529772	ENSSSCG00000042794	ENSSSCG00000042794	-19.14	8.42643e-05	0	1	0	1	-21.5273	2.14945e-07	C	A	0/0	0/0	0/0	0/0	1|1	1|1	./.	./.	1|1	1|1	0/0	0/0	0/0	0/0	0/0	./.	./.	./.
[truncated: 15 more columns]

## Sheet: Transcription Factors
Minipig, in which a ROHR was overlapping with candidate variant	Type	Caller	Chromosome	Start	End	Ref	Alt	TF_motif	TF_position_1	TF_orientation_1	TF_word_1	TF_position_2	TF_orientation_2	TF_word_2	TF_Pvalue_1	TF_Pvalue_2	TF_Fold_change	Ensembl gene ID of assigned gene	PeakID	Peak_chr	Peak_start	Peak_end	signalValue	Contact	adaptedActivity	scaledContact	intergenicScore	TSS.dist	ABC.Score	Gene.chr	Gene.start.(bp)	Gene.end.(bp)	Gene name	L2FC_AMAS	pvalue_AMAS	L2FC_AMMA	pvalue_AMMA	L2FC_MLMA	pvalue_MLMA	L2FC_MLAS	pvalue_MLAS
AM	SNV	GATK	1	65848899	65848899	G	A	MA0478.1 FOSL2	-5	direct	gggtgGgtctg	-5	direct	gggtgAgtctg	0.00411797	0.000356674	11.5455	ENSSSCG00000057553	1:65848590-65849090	1	65848590	65849090	101.667	1.51646	2.46838	46.4811	2.46838	374691	0.0554565	1	66223781	66229259	ENSSSCG00000057553	13.8589	0.00457399	13.3926	0.0125603	19.1625	1.31465e-05	19.6288	2.16579e-06
AM	SNV	GATK	1	65848899	65848899	G	A	MA0595.1 SREBF1	-8	revcomp	cCcaccccac	-8	revcomp	cTcaccccac	0.00024128	5.72205e-06	42.1667	ENSSSCG00000057553	1:65848590-65849090	1	65848590	65849090	101.667	1.51646	2.46838	46.4811	2.46838	374691	0.0554565	1	66223781	66229259	ENSSSCG00000057553	13.8589	0.00457399	13.3926	0.0125603	19.1625	1.31465e-05	19.6288	2.16579e-06
AM	SNV	GATK	1	65848899	65848899	G	A	MA0516.3 SP2	-6	direct	ggggtgGgt	-6	direct	ggggtgAgt	0.000396729	0.00514221	0.0771513	ENSSSCG00000057553	1:65848590-65849090	1	65848590	65849090	101.667	1.51646	2.46838	46.4811	2.46838	374691	0.0554565	1	66223781	66229259	ENSSSCG00000057553	13.8589	0.00457399	13.3926	0.0125603	19.1625	1.31465e-05	19.6288	2.16579e-06
AM	SNV	GATK	1	65848899	65848899	G	A	MA0659.3 Mafg	-6	direct	ggggtgGgtctgccg	-6	direct	ggggtgAgtctgccg	0.00329059	0.000435455	7.55667	ENSSSCG00000057553	1:65848590-65849090	1	65848590	65849090	101.667	1.51646	2.46838	46.4811	2.46838	374691	0.0554565	1	66223781	66229259	ENSSSCG00000057553	13.8589	0.00457399	13.3926	0.0125603	19.1625	1.31465e-05	19.6288	2.16579e-06
AM	SNV	GATK	1	65848899	65848899	G	A	MA1511.2 KLF10	-6	direct	ggggtgGgt	-6	direct	ggggtgAgt	0.000293732	0.00184631	0.159091	ENSSSCG00000057553	1:65848590-65849090	1	65848590	65849090	101.667	1.51646	2.46838	46.4811	2.46838	374691	0.0554565	1	66223781	66229259	ENSSSCG00000057553	13.8589	0.00457399	13.3926	0.0125603	19.1625	1.31465e-05	19.6288	2.16579e-06
AM	SNV	GATK	1	65848899	65848899	G	A	MA0073.1 RREB1	-17	revcomp	acCcaccccaccccctcccg	-17	revcomp	acTcaccccaccccctcccg	3.73442e-07	5.27819e-06	0.0707519	ENSSSCG00000057553	1:65848590-65849090	1	65848590	65849090	101.667	1.51646	2.46838	46.4811	2.46838	374691	0.0554565	1	66223781	66229259	ENSSSCG00000057553	13.8589	0.00457399	13.3926	0.0125603	19.1625	1.31465e-05	19.6288	2.16579e-06
AM	SNV	GATK	1	65848899	65848899	G	A	MA1961.1 PATZ1	-8	direct	gtggggtgGgtc	-8	direct	gtggggtgAgtc	0.000366211	0.00417399	0.0877363	ENSSSCG00000057553	1:65848590-65849090	1	65848590	65849090	101.667	1.51646	2.46838	46.4811	2.46838	374691	0.0554565	1	66223781	66229259	ENSSSCG00000057553	13.8589	0.00457399	13.3926	0.0125603	19.1625	1.31465e-05	19.6288	2.16579e-06
AM	SNV	GATK	1	65848899	65848899	G	A	MA0591.1 Bach1::Mafk	-6	direct	ggggtgGgtctgccg	-6	direct	ggggtgAgtctgccg	0.00240493	0.000247099	9.73267	ENSSSCG00000057553	1:65848590-65849090	1	65848590	65849090	101.667	1.51646	2.46838	46.4811	2.46838	374691	0.0554565	1	66223781	66229259	ENSSSCG00000057553	13.8589	0.00457399	13.3926	0.0125603	19.1625	1.31465e-05	19.6288	2.16579e-06
AM	SNV	GATK	1	65848899	65848899	G	A	MA0599.1 KLF5	-6	revcomp	gacCcacccc	-6	revcomp	gacTcacccc	0.000110626	0.00105667	0.104693	ENSSSCG00000057553	1:65848590-65849090	1	65848590	65849090	101.667	1.51646	2.46838	46.4811	2.46838	374691	0.0554565	1	66223781	66229259	ENSSSCG00000057553	13.8589	0.00457399	13.3926	0.0125603	19.1625	1.31465e-05	19.6288	2.16579e-06
AM	SNV	GATK	1	65848899	65848899	G	A	MA1513.1 KLF15	-7	revcomp	gacCcacccca	-7	revcomp	gacTcacccca	0.000453949	0.00470352	0.0965126	ENSSSCG00000057553	1:65848590-65849090	1	65848590	65849090	101.667	1.51646	2.46838	46.4811	2.46838	374691	0.0554565	1	66223781	66229259	ENSSSCG00000057553	13.8589	0.00457399	13.3926	0.0125603	19.1625	1.31465e-05	19.6288	2.16579e-06
AM	SNV	GATK	1	65848899	65848899	G	A	MA0039.4 KLF4	-7	revcomp	agacCcacccca	-7	revcomp	agacTcacccca	0.000186503	0.00146377	0.127413	ENSSSCG00000057553	1:65848590-65849090	1	65848590	65849090	101.667	1.51646	2.46838	46.4811	2.46838	374691	0.0554565	1	66223781	66229259	ENSSSCG00000057553	13.8589	0.00457399	13.3926	0.0125603	19.1625	1.31465e-05	19.6288	2.16579e-06
AM	SNV	GATK	1	65848899	65848899	G	A	MA0079.5 SP1	-6	direct	ggggtgGgt	-6	direct	ggggtgAgt	0.000465393	0.00455475	0.102178	ENSSSCG00000057553	1:65848590-65849090	1	65848590	65849090	101.667	1.51646	2.46838	46.4811	2.46838	374691	0.0554565	1	66223781	66229259	ENSSSCG00000057553	13.8589	0.00457399	13.3926	0.0125603	19.1625	1.31465e-05	19.6288	2.16579e-06
AM	SNV	GATK	1	65848899	65848899	G	A	MA0596.1 SREBF2	-8	direct	gtggggtgGg	-8	direct	gtggggtgAg	0.000760078	2.57492e-05	29.5185	ENSSSCG00000057553	1:65848590-65849090	1	65848590	65849090	101.667	1.51646	2.46838	46.4811	2.46838	374691	0.0554565	1	66223781	66229259	ENSSSCG00000057553	13.8589	0.00457399	13.3926	0.0125603	19.1625	1.31465e-05	19.6288	2.16579e-06
AM	SNV	GATK	13	2140379	2140379	G	C	MA0738.1 HIC2	-3	revcomp	gtgccCtct	-3	revcomp	gtgccGtct	0.000297546	0.00354767	0.083871	ENSSSCG00000037430	13:2140335-2140835	13	2140335	2140835	80.8333	4.26802	3.36235	83.1813	3.36235	154537	0.0395835	13	1817406	1985799	COL6A6	2.08096	0.35265	5.11633	0.042604	2.15425	0.287748	-0.881129	0.638988
AM	SNV	GATK	13	2140379	2140379	G	C	MA1126.1 FOS::JUN	-9	revcomp	agtgccCtcttatttg	-9	revcomp	agtgccGtcttatttg	0.00265909	0.000437899	6.07238	ENSSSCG00000037430	13:2140335-2140835	13	2140335	2140835	80.8333	4.26802	3.36235	83.1813	3.36235	154537	0.0395835	13	1817406	1985799	COL6A6	2.08096	0.35265	5.11633	0.042604	2.15425	0.287748	-0.881129	0.638988
AM	SNV	GATK	13	2140380	2140380	G	A	MA0138.2 REST	-15	direct	gtcagcaaataagagGgcact	-15	direct	gtcagcaaataagagAgcact	0.0015158	0.000203	7.46699	ENSSSCG00000037430	13:2140335-2140835	13	2140335	2140835	80.8333	4.26802	3.36235	83.1813	3.36235	154537	0.0395835	13	1817406	1985799	COL6A6	2.08096	0.35265	5.11633	0.042604	2.15425	0.287748	-0.881129	0.638988
AM	SNV	GATK	13	2140380	2140380	G	A	MA0738.1 HIC2	-4	revcomp	gtgcCctct	-4	revcomp	gtgcTctct	0.000297546	0.00636673	0.0467346	ENSSSCG00000037430	13:2140335-2140835	13	2140335	2140835	80.8333	4.26802	3.36235	83.1813	3.36235	154537	0.0395835	13	1817406	1985799	COL6A6	2.08096	0.35265	5.11633	0.042604	2.15425	0.287748	-0.881129	0.638988
AM	SNV	GATK	13	2140380	2140380	G	A	MA1726.1 ZNF331	-2	revcomp	tgttgcagtgcCct	-2	revcomp	tgttgcagtgcTct	3.72827e-05	0.000283618	0.131454	ENSSSCG00000037430	13:2140335-2140835	13	2140335	2140835	80.8333	4.26802	3.36235	83.1813	3.36235	154537	0.0395835	13	1817406	1985799	COL6A6	2.08096	0.35265	5.11633	0.042604	2.15425	0.287748	-0.881129	0.638988
AM	SNV	GATK	13	2140380	2140380	G	A	MA0038.2 GFI1	-3	direct	gagGgcactgca	-3	direct	gagAgcactgca	0.0045895	0.000410795	11.1722	ENSSSCG00000037430	13:2140335-2140835	13	2140335	2140835	80.8333	4.26802	3.36235	83.1813	3.36235	154537	0.0395835	13	1817406	1985799	COL6A6	2.08096	0.35265	5.11633	0.042604	2.15425	0.287748	-0.881129	0.638988
AM	SNV	GATK	13	2140453	2140453	C	G	MA0154.4 EBF1	-9	revcomp	atttgGcaggggcag	-9	revcomp	atttgCcaggggcag	0.0043461	0.00038485	11.293	ENSSSCG00000037430	13:2140335-2140835	13	2140335	2140835	80.8333	4.26802	3.36235	83.1813	3.36235	154537	0.0395835	13	1817406	1985799	COL6A6	2.08096	0.35265	5.11633	0.042604	2.15425	0.287748	-0.881129	0.638988
AM	SNV	GATK	13	2140453	2140453	C	G	MA0599.1 KLF5	-7	direct	gcccctgCca	-7	direct	gcccctgGca	0.000395775	0.00590706	0.0670003	ENSSSCG00000037430	13:2140335-2140835	13	2140335	2140835	80.8333	4.26802	3.36235	83.1813	3.36235	154537	0.0395835	13	1817406	1985799	COL6A6	2.08096	0.35265	5.11633	0.042604	2.15425	0.287748	-0.881129	0.638988
AM	SNV	GATK	13	2140453	2140453	C	G	MA0670.1 NFIA	-4	direct	cctgCcaaat	-4	direct	cctgGcaaat	0.000131607	0.00261307	0.050365	ENSSSCG00000037430	13:2140335-2140835	13	2140335	2140835	80.8333	4.26802	3.36235	83.1813	3.36235	154537	0.0395835	13	1817406	1985799	COL6A6	2.08096	0.35265	5.11633	0.042604	2.15425	0.287748	-0.881129	0.638988
AM	SNV	GATK	13	2140453	2140453	C	G	MA1522.1 MAZ	-8	direct	tgcccctgCca	-8	direct	tgcccctgGca	0.000350237	0.00400281	0.0874978	ENSSSCG00000037430	13:2140335-2140835	13	2140335	2140835	80.8333	4.26802	3.36235	83.1813	3.36235	154537	0.0395835	13	1817406	1985799	COL6A6	2.08096	0.35265	5.11633	0.042604	2.15425	0.287748	-0.881129	0.638988
AM	SNV	GATK	13	2140453	2140453	C	G	MA1558.1 SNAI1	-8	revcomp	gGcaggggca	-8	revcomp	gCcaggggca	0.000369072	0.00249958	0.147654	ENSSSCG00000037430	13:2140335-2140835	13	2140335	2140835	80.8333	4.26802	3.36235	83.1813	3.36235	154537	0.0395835	13	1817406	1985799	COL6A6	2.08096	0.35265	5.11633	0.042604	2.15425	0.287748	-0.881129	0.638988
AM	SNV	GATK	13	2140453	2140453	C	G	MA1569.1 TFAP2E	-8	direct	tgcccctgCca	-8	direct	tgcccctgGca	0.00357747	0.000138283	25.8707	ENSSSCG00000037430	13:2140335-2140835	13	2140335	2140835	80.8333	4.26802	3.36235	83.1813	3.36235	154537	0.0395835	13	1817406	1985799	COL6A6	2.08096	0.35265	5.11633	0.042604	2.15425	0.287748	-0.881129	0.638988
AM	SNV	GATK	13	2140453	2140453	C	G	MA0502.2 NFYB	-3	revcomp	agcatttgGcag	-3	revcomp	agcatttgCcag	0.00336307	0.000330329	10.181	ENSSSCG00000037430	13:2140335-2140835	13	2140335	2140835	80.8333	4.26802	3.36235	83.1813	3.36235	154537	0.0395835	13	1817406	1985799	COL6A6	2.08096	0.35265	5.11633	0.042604	2.15425	0.287748	-0.881129	0.638988
AM	SNV	GATK	13	2140453	2140453	C	G	MA0003.4 TFAP2A	-10	direct	gctgcccctgCcaa	-10	direct	gctgcccctgGcaa	0.00508013	0.000382889	13.2679	ENSSSCG00000037430	13:2140335-2140835	13	2140335	2140835	80.8333	4.26802	3.36235	83.1813	3.36235	154537	0.0395835	13	1817406	1985799	COL6A6	2.08096	0.35265	5.11633	0.042604	2.15425	0.287748	-0.881129	0.638988
AM	SNV	GATK	13	2140453	2140453	C	G	MA1724.1 Rfx6	-6	direct	cccctgCcaaatg	-6	direct	cccctgGcaaatg	0.00498639	0.000363454	13.7194	ENSSSCG00000037430	13:2140335-2140835	13	2140335	2140835	80.8333	4.26802	3.36235	83.1813	3.36235	154537	0.0395835	13	1817406	1985799	COL6A6	2.08096	0.35265	5.11633	0.042604	2.15425	0.287748	-0.881129	0.638988
AM	SNV	GATK	14	130691997	130691997	C	T	MA1515.1 KLF2	-8	direct	agtcccgcCca	-8	direct	agtcccgcTca	0.000326633	0.00538874	0.0606141	ENSSSCG00000057767	14:130691633-130692133	14	130691633	130692133	135.333	6.04931	14.1417	66.5932	14.1417	859051	0.094117	14	131487780	131551184	ENSSSCG00000057767	-16.1018	0.000163467	-12.6846	0.0071871	2.65833	0.489926	-0.758798	0.832254
AM	SNV	GATK	14	130691997	130691997	C	T	MA0471.2 E2F6	-9	revcomp	ctgGgcgggactg	-9	revcomp	ctgAgcgggactg	0.000153825	0.00168786	0.0911362	ENSSSCG00000057767	14:130691633-130692133	14	130691633	130692133	135.333	6.04931	14.1417	66.5932	14.1417	859051	0.094117	14	131487780	131551184	ENSSSCG00000057767	-16.1018	0.000163467	-12.6846	0.0071871	2.65833	0.489926	-0.758798	0.832254
AM	SNV	GATK	14	130691997	130691997	C	T	MA1959.1 KLF7	-6	revcomp	tgGgcggga	-6	revcomp	tgAgcggga	0.000362396	0.00483704	0.0749211	ENSSSCG00000057767	14:130691633-130692133	14	130691633	130692133	135.333	6.04931	14.1417	66.5932	14.1417	859051	0.094117	14	131487780	131551184	ENSSSCG00000057767	-16.1018	0.000163467	-12.6846	0.0071871	2.65833	0.489926	-0.758798	0.832254
AM	SNV	GATK	14	130691997	130691997	C	T	MA0493.2 KLF1	-6	revcomp	tgGgcggga	-6	revcomp	tgAgcggga	0.000343323	0.00500488	0.0685976	ENSSSCG00000057767	14:130691633-130692133	14	130691633	130692133	135.333	6.04931	14.1417	66.5932	14.1417	859051	0.094117	14	131487780	131551184	ENSSSCG00000057767	-16.1018	0.000163467	-12.6846	0.0071871	2.65833	0.489926	-0.758798	0.832254
AM	SNV	GATK	14	130691997	130691997	C	T	MA0516.3 SP2	-6	revcomp	tgGgcggga	-6	revcomp	tgAgcggga	0.000125885	0.0020256	0.0621469	ENSSSCG00000057767	14:130691633-130692133	14	130691633	130692133	135.333	6.04931	14.1417	66.5932	14.1417	859051	0.094117	14	131487780	131551184	ENSSSCG00000057767	-16.1018	0.000163467	-12.6846	0.0071871	2.65833	0.489926	-0.758798	0.832254
AM	SNV	GATK	14	130691997	130691997	C	T	MA0685.2 SP4	-6	revcomp	tgGgcggga	-6	revcomp	tgAgcggga	0.000442505	0.00574875	0.0769741	ENSSSCG00000057767	14:130691633-130692133	14	130691633	130692133	135.333	6.04931	14.1417	66.5932	14.1417	859051	0.094117	14	131487780	131551184	ENSSSCG00000057767	-16.1018	0.000163467	-12.6846	0.0071871	2.65833	0.489926	-0.758798	0.832254
AM	SNV	GATK	14	130691997	130691997	C	T	MA0742.2 KLF12	-6	revcomp	tgGgcggga	-6	revcomp	tgAgcggga	0.000328064	0.00431824	0.0759717	ENSSSCG00000057767	14:130691633-130692133	14	130691633	130692133	135.333	6.04931	14.1417	66.5932	14.1417	859051	0.094117	14	131487780	131551184	ENSSSCG00000057767	-16.1018	0.000163467	-12.6846	0.0071871	2.65833	0.489926	-0.758798	0.832254
AM	SNV	GATK	14	130691997	130691997	C	T	MA1511.2 KLF10	-6	revcomp	tgGgcggga	-6	revcomp	tgAgcggga	0.000343323	0.00499344	0.0687548	ENSSSCG00000057767	14:130691633-130692133	14	130691633	130692133	135.333	6.04931	14.1417	66.5932	14.1417	859051	0.094117	14	131487780	131551184	ENSSSCG00000057767	-16.1018	0.000163467	-12.6846	0.0071871	2.65833	0.489926	-0.758798	0.832254
AM	SNV	GATK	14	130691997	130691997	C	T	MA0599.1 KLF5	-7	direct	gtcccgcCca	-7	direct	gtcccgcTca	0.000104904	0.00230026	0.0456053	ENSSSCG00000057767	14:130691633-130692133	14	130691633	130692133	135.333	6.04931	14.1417	66.5932	14.1417	859051	0.094117	14	131487780	131551184	ENSSSCG00000057767	-16.1018	0.000163467	-12.6846	0.0071871	2.65833	0.489926	-0.758798	0.832254
AM	SNV	GATK	14	130691997	130691997	C	T	MA0735.1 GLIS1	-8	direct	agtcccgcCcagaagg	-8	direct	agtcccgcTcagaagg	0.000372555	0.00254467	0.146406	ENSSSCG00000057767	14:130691633-130692133	14	130691633	130692133	135.333	6.04931	14.1417	66.5932	14.1417	859051	0.094117	14	131487780	131551184	ENSSSCG00000057767	-16.1018	0.000163467	-12.6846	0.0071871	2.65833	0.489926	-0.758798	0.832254
AM	SNV	GATK	14	130691997	130691997	C	T	MA0737.1 GLIS3	-7	direct	gtcccgcCcagaag	-7	direct	gtcccgcTcagaag	0.000489578	0.00262007	0.186857	ENSSSCG00000057767	14:130691633-130692133	14	130691633	130692133	135.333	6.04931	14.1417	66.5932	14.1417	859051	0.094117	14	131487780	131551184	ENSSSCG00000057767	-16.1018	0.000163467	-12.6846	0.0071871	2.65833	0.489926	-0.758798	0.832254
AM	SNV	GATK	14	130691997	130691997	C	T	MA1513.1 KLF15	-7	direct	gtcccgcCcag	-7	direct	gtcccgcTcag	3.17097e-05	0.00066328	0.0478073	ENSSSCG00000057767	14:130691633-130692133	14	130691633	130692133	135.333	6.04931	14.1417	66.5932	14.1417	859051	0.094117	14	131487780	131551184	ENSSSCG00000057767	-16.1018	0.000163467	-12.6846	0.0071871	2.65833	0.489926	-0.758798	0.832254
AM	SNV	GATK	3	117806748	117806748	G	A	MA1104.2 GATA6	-7	revcomp	ctttcCtgtctgc	-7	revcomp	ctttcTtgtctgc	0.00368243	0.000278801	13.2081	ENSSSCG00000054581	3:117806584-117807084	3	117806584	117807084	90.1667	29.5189	27.0363	84.7588	27.0363	4701	0.122913	3	117810941	117811785	ENSSSCG00000054581	3.39656	0.041532	0.456223	0.787051	-1.78826	0.211989	1.15208	0.45294
AM	SNV	GATK	3	117806748	117806748	G	A	MA1936.1 ERF::FOXO1	-7	direct	gcagacaGgaaagt	-7	direct	gcagacaAgaaagt	9.55462e-05	0.00153909	0.0620796	ENSSSCG00000054581	3:117806584-117807084	3	117806584	117807084	90.1667	29.5189	27.0363	84.7588	27.0363	4701	0.122913	3	117810941	117811785	ENSSSCG00000054581	3.39656	0.041532	0.456223	0.787051	-1.78826	0.211989	1.15208	0.45294
AM	SNV	GATK	3	117806748	117806748	G	A	MA1956.1 FOXO1::FLI1	-7	direct	gcagacaGgaaagt	-7	direct	gcagacaAgaaagt	0.000157628	0.00128794	0.122388	ENSSSCG00000054581	3:117806584-117807084	3	117806584	117807084	90.1667	29.5189	27.0363	84.7588	27.0363	4701	0.122913	3	117810941	117811785	ENSSSCG00000054581	3.39656	0.041532	0.456223	0.787051	-1.78826	0.211989	1.15208	0.45294
AM	SNV	GATK	3	117806748	117806748	G	A	MA0482.2 GATA4	-7	revcomp	tttcCtgtctgc	-7	revcomp	tttcTtgtctgc	0.00507116	0.000440955	11.5004	ENSSSCG00000054581	3:117806584-117807084	3	117806584	117807084	90.1667	29.5189	27.0363	84.7588	27.0363	4701	0.122913	3	117810941	117811785	ENSSSCG00000054581	3.39656	0.041532	0.456223	0.787051	-1.78826	0.211989	1.15208	0.45294
AM	SNV	GATK	3	117806748	117806748	G	A	MA0474.3 Erg	-5	direct	agacaGgaaagtca	-5	direct	agacaAgaaagtca	0.000386413	0.00500798	0.0771595	ENSSSCG00000054581	3:117806584-117807084	3	117806584	117807084	90.1667	29.5189	27.0363	84.7588	27.0363	4701	0.122913	3	117810941	117811785	ENSSSCG00000054581	3.39656	0.041532	0.456223	0.787051	-1.78826	0.211989	1.15208	0.45294
AM	SNV	GATK	3	117806748	117806748	G	A	MA1935.1 ERF::FOXI1	-7	direct	gcagacaGgaaagt	-7	direct	gcagacaAgaaagt	8.77939e-05	0.00179627	0.0488757	ENSSSCG00000054581	3:117806584-117807084	3	117806584	117807084	90.1667	29.5189	27.0363	84.7588	27.0363	4701	0.122913	3	117810941	117811785	ENSSSCG00000054581	3.39656	0.041532	0.456223	0.787051	-1.78826	0.211989	1.15208	0.45294
AM	SNV	GATK	3	117806748	117806748	G	A	MA1508.1 IKZF1	-6	direct	cagacaGgaaag	-6	direct	cagacaAgaaag	7.64728e-05	0.00156808	0.0487684	ENSSSCG00000054581	3:117806584-117807084	3	117806584	117807084	90.1667	29.5189	27.0363	84.7588	27.0363	4701	0.122913	3	117810941	117811785	ENSSSCG00000054581	3.39656	0.041532	0.456223	0.787051	-1.78826	0.211989	1.15208	0.45294
AM	SNV	GATK	3	117806748	117806748	G	A	MA1942.1 ETV2::FOXI1	-8	direct	agcagacaGgaaagt	-8	direct	agcagacaAgaaagt	0.000119927	0.0019003	0.0631097	ENSSSCG00000054581	3:117806584-117807084	3	117806584	117807084	90.1667	29.5189	27.0363	84.7588	27.0363	4701	0.122913	3	117810941	117811785	ENSSSCG00000054581	3.39656	0.041532	0.456223	0.787051	-1.78826	0.211989	1.15208	0.45294
AM	SNV	GATK	3	117806748	117806748	G	A	MA0036.3 GATA2	-7	revcomp	ttcCtgtctgc	-7	revcomp	ttcTtgtctgc	0.00648069	0.000492334	13.1632	ENSSSCG00000054581	3:117806584-117807084	3	117806584	117807084	90.1667	29.5189	27.0363	84.7588	27.0363	4701	0.122913	3	117810941	117811785	ENSSSCG00000054581	3.39656	0.041532	0.456223	0.787051	-1.78826	0.211989	1.15208	0.45294
AM	SNV	GATK	3	117806748	117806748	G	A	MA0037.4 Gata3	-7	revcomp	tttcCtgtctgc	-7	revcomp	tttcTtgtctgc	0.00243157	0.000163317	14.8887	ENSSSCG00000054581	3:117806584-117807084	3	117806584	117807084	90.1667	29.5189	27.0363	84.7588	27.0363	4701	0.122913	3	117810941	117811785	ENSSSCG00000054581	3.39656	0.041532	0.456223	0.787051	-1.78826	0.211989	1.15208	0.45294
AM	SNV	GATK	3	117806748	117806748	G	A	MA1955.1 FOXO1::ELK3	-7	direct	gcagacaGgaaagt	-7	direct	gcagacaAgaaagt	0.000350002	0.00350209	0.0999409	ENSSSCG00000054581	3:117806584-117807084	3	117806584	117807084	90.1667	29.5189	27.0363	84.7588	27.0363	4701	0.122913	3	117810941	117811785	ENSSSCG00000054581	3.39656	0.041532	0.456223	0.787051	-1.78826	0.211989	1.15208	0.45294
AM	SNV	GATK	3	117806748	117806748	G	A	MA0761.2 ETV1	-5	direct	agacaGgaaagtca	-4	direct	gacaAgaaagtcaa	0.000436384	0.00415977	0.104906	ENSSSCG00000054581	3:117806584-117807084	3	117806584	117807084	90.1667	29.5189	27.0363	84.7588	27.0363	4701	0.122913	3	117810941	117811785	ENSSSCG00000054581	3.39656	0.041532	0.456223	0.787051	-1.78826	0.211989	1.15208	0.45294
AM	SNV	GATK	3	117806748	117806748	G	A	MA1970.1 TRPS1	-7	revcomp	tttcCtgtctgc	-7	revcomp	tttcTtgtctgc	0.00292468	0.000207663	14.0838	ENSSSCG00000054581	3:117806584-117807084	3	117806584	117807084	90.1667	29.5189	27.0363	84.7588	27.0363	4701	0.122913	3	117810941	117811785	ENSSSCG00000054581	3.39656	0.041532	0.456223	0.787051	-1.78826	0.211989	1.15208	0.45294
AM	SNV	GATK	3	117806748	117806748	G	A	MA1953.1 FOXO1::ELF1	-7	direct	gcagacaGgaaagt	-7	direct	gcagacaAgaaagt	0.000206202	0.00228142	0.0903833	ENSSSCG00000054581	3:117806584-117807084	3	117806584	117807084	90.1667	29.5189	27.0363	84.7588	27.0363	4701	0.122913	3	117810941	117811785	ENSSSCG00000054581	3.39656	0.041532	0.456223	0.787051	-1.78826	0.211989	1.15208	0.45294
AM	SNV	GATK	3	117806748	117806748	G	A	MA1946.1 ETV5::FOXI1	-7	direct	gcagacaGgaaag	-7	direct	gcagacaAgaaag	0.000382394	0.00333723	0.114584	ENSSSCG00000054581	3:117806584-117807084	3	117806584	117807084	90.1667	29.5189	27.0363	84.7588	27.0363	4701	0.122913	3	117810941	117811785	ENSSSCG00000054581	3.39656	0.041532	0.456223	0.787051	-1.78826	0.211989	1.15208	0.45294
AM	SNV	GATK	3	117806748	117806748	G	A	MA0107.1 RELA	0	revcomp	ttgactttcC	0	revcomp	ttgactttcT	0.000433922	0.00520325	0.0833944	ENSSSCG00000054581	3:117806584-117807084	3	117806584	117807084	90.1667	29.5189	27.0363	84.7588	27.0363	4701	0.122913	3	117810941	117811785	ENSSSCG00000054581	3.39656	0.041532	0.456223	0.787051	-1.78826	0.211989	1.15208	0.45294
AM	SNV	GATK	3	117806748	117806748	G	A	MA1952.1 FOXJ2::ELF1	-7	direct	gcagacaGgaaagt	-7	direct	gcagacaAgaaagt	0.000424672	0.00288574	0.147162	ENSSSCG00000054581	3:117806584-117807084	3	117806584	117807084	90.1667	29.5189	27.0363	84.7588	27.0363	4701	0.122913	3	117810941	117811785	ENSSSCG00000054581	3.39656	0.041532	0.456223	0.787051	-1.78826	0.211989	1.15208	0.45294
AM	SNV	GATK	3	117806748	117806748	G	A	MA1950.1 FLI1::FOXI1	-7	direct	gcagacaGgaaagt	-7	direct	gcagacaAgaaagt	5.05522e-05	0.000905838	0.0558071	ENSSSCG00000054581	3:117806584-117807084	3	117806584	117807084	90.1667	29.5189	27.0363	84.7588	27.0363	4701	0.122913	3	117810941	117811785	ENSSSCG00000054581	3.39656	0.041532	0.456223	0.787051	-1.78826	0.211989	1.15208	0.45294
AM	SNV	GATK	3	117806748	117806748	G	A	MA0029.1 Mecom	-6	direct	cagacaGgaaagtc	-6	direct	cagacaAgaaagtc	0.00188206	0.000204343	9.21027	ENSSSCG00000054581	3:117806584-117807084	3	117806584	117807084	90.1667	29.5189	27.0363	84.7588	27.0363	4701	0.122913	3	117810941	117811785	ENSSSCG00000054581	3.39656	0.041532	0.456223	0.787051	-1.78826	0.211989	1.15208	0.45294
AM	SNV	GATK	3	117806748	117806748	G	A	MA1121.1 TEAD2	-4	revcomp	tgactttcCtgtc	-4	revcomp	tgactttcTtgtc	0.000489667	0.00555727	0.0881129	ENSSSCG00000054581	3:117806584-117807084	3	117806584	117807084	90.1667	29.5189	27.0363	84.7588	27.0363	4701	0.122913	3	117810941	117811785	ENSSSCG00000054581	3.39656	0.041532	0.456223	0.787051	-1.78826	0.211989	1.15208	0.45294
AM	SNV	GATK	3	117806748	117806748	G	A	MA1947.1 ETV5::FOXO1	-7	direct	gcagacaGgaaag	-7	direct	gcagacaAgaaag	0.000238061	0.00265564	0.0896435	ENSSSCG00000054581	3:117806584-117807084	3	117806584	117807084	90.1667	29.5189	27.0363	84.7588	27.0363	4701	0.122913	3	117810941	117811785	ENSSSCG00000054581	3.39656	0.041532	0.456223	0.787051	-1.78826	0.211989	1.15208	0.45294
AM	SNV	GATK	4	75761930	75761930	C	G	MA1102.2 CTCFL	-2	direct	acCaggtcgcgc	-2	direct	acGaggtcgcgc	0.000357211	0.00199097	0.179415	ENSSSCG00000048200	4:75761858-75762358	4	75761858	75762358	234.667	29.2757	40.9868	100	40.9868	477	0.813756	4	75750579	75761382	ENSSSCG00000048200	-4.8488	0.00729314	-4.95778	0.0126897	-2.04454	0.209734	-1.93556	0.205668
AM	SNV	GATK	4	75761951	75761951	C	T	MA0471.2 E2F6	-2	revcomp	cctggcggcaGcg	-2	revcomp	cctggcggcaAcg	0.00162436	0.000297099	5.4674	ENSSSCG00000048200	4:75761858-75762358	4	75761858	75762358	234.667	29.2757	40.9868	100	40.9868	477	0.813756	4	75750579	75761382	ENSSSCG00000048200	-4.8488	0.00729314	-4.95778	0.0126897	-2.04454	0.209734	-1.93556	0.205668
AM	SNV	GATK	4	75761951	75761951	C	T	MA1961.1 PATZ1	-9	revcomp	caGcggtggggc	-9	revcomp	caAcggtggggc	0.000166714	0.000967026	0.172399	ENSSSCG00000048200	4:75761858-75762358	4	75761858	75762358	234.667	29.2757	40.9868	100	40.9868	477	0.813756	4	75750579	75761382	ENSSSCG00000048200	-4.8488	0.00729314	-4.95778	0.0126897	-2.04454	0.209734	-1.93556	0.205668
AM	SNV	GATK	4	75761951	75761951	C	T	MA1554.1 RFX7	-2	direct	cgCtgccgc	-2	direct	cgTtgccgc	0.00284576	0.000144958	19.6316	ENSSSCG00000048200	4:75761858-75762358	4	75761858	75762358	234.667	29.2757	40.9868	100	40.9868	477	0.813756	4	75750579	75761382	ENSSSCG00000048200	-4.8488	0.00729314	-4.95778	0.0126897	-2.04454	0.209734	-1.93556	0.205668
AM	SNV	GATK	9	2191270	2191270	T	C	MA0501.1 MAF::NFE2	-1	direct	aTgactctgcaggaa	-1	direct	aCgactctgcaggaa	9.54326e-06	0.00018677	0.0510963	ENSSSCG00000057645	9:2191162-2191662	9	2191162	2191662	88.3333	6.73147	5.65688	38.6504	5.65688	598640	0.0210011	9	2789370	2790302	ENSSSCG00000057645	-19.4711	5.46786e-05	0	1	24.9775	1.467e-08	-4.24553	0.302248
AM	SNV	GATK	9	2191270	2191270	T	C	MA1988.1 Atf3	-2	direct	gaTgactctgc	-2	direct	gaCgactctgc	0.00049305	0.0070734	0.0697047	ENSSSCG00000057645	9:2191162-2191662	9	2191162	2191662	88.3333	6.73147	5.65688	38.6504	5.65688	598640	0.0210011	9	2789370	2790302	ENSSSCG00000057645	-19.4711	5.46786e-05	0	1	24.9775	1.467e-08	-4.24553	0.302248
AM	SNV	GATK	9	2191270	2191270	T	C	MA0841.1 NFE2	-2	direct	gaTgactctgc	-2	direct	gaCgactctgc	0.000331163	0.00357199	0.0927113	ENSSSCG00000057645	9:2191162-2191662	9	2191162	2191662	88.3333	6.73147	5.65688	38.6504	5.65688	598640	0.0210011	9	2789370	2790302	ENSSSCG00000057645	-19.4711	5.46786e-05	0	1	24.9775	1.467e-08	-4.24553	0.302248
AM	SNV	GATK	9	2191270	2191270	T	C	MA1141.1 FOS::JUND	-3	revcomp	tgcagagtcAtct	-3	revcomp	tgcagagtcGtct	0.000336125	0.00459459	0.0731567	ENSSSCG00000057645	9:2191162-2191662	9	2191162	2191662	88.3333	6.73147	5.65688	38.6504	5.65688	598640	0.0210011	9	2789370	2790302	ENSSSCG00000057645	-19.4711	5.46786e-05	0	1	24.9775	1.467e-08	-4.24553	0.302248
AM	SNV	GATK	9	2191270	2191270	T	C	MA1144.1 FOSL2::JUND	-2	direct	gaTgactctg	-2	direct	gaCgactctg	0.000396729	0.00563717	0.0703773	ENSSSCG00000057645	9:2191162-2191662	9	2191162	2191662	88.3333	6.73147	5.65688	38.6504	5.65688	598640	0.0210011	9	2789370	2790302	ENSSSCG00000057645	-19.4711	5.46786e-05	0	1	24.9775	1.467e-08	-4.24553	0.302248
AM	SNV	GATK	9	2191270	2191270	T	C	MA0794.1 PROX1	-5	direct	gaagaTgactct	-5	direct	gaagaCgactct	0.00327325	0.000337601	9.69562	ENSSSCG00000057645	9:2191162-2191662	9	2191162	2191662	88.3333	6.73147	5.65688	38.6504	5.65688	598640	0.0210011	9	2789370	2790302	ENSSSCG00000057645	-19.4711	5.46786e-05	0	1	24.9775	1.467e-08	-4.24553	0.302248
AM	SNV	GATK	9	2191270	2191270	T	C	MA1137.1 FOSL1::JUNB	-3	direct	agaTgactctgca	-3	direct	agaCgactctgca	0.000416979	0.00707433	0.0589426	ENSSSCG00000057645	9:2191162-2191662	9	2191162	2191662	88.3333	6.73147	5.65688	38.6504	5.65688	598640	0.0210011	9	2789370	2790302	ENSSSCG00000057645	-19.4711	5.46786e-05	0	1	24.9775	1.467e-08	-4.24553	0.302248
AM	SNV	GATK	9	2191270	2191270	T	C	MA0476.1 FOS	-2	revcomp	gcagagtcAtc	-2	revcomp	gcagagtcGtc	0.000356197	0.0047915	0.0743395	ENSSSCG00000057645	9:2191162-2191662	9	2191162	2191662	88.3333	6.73147	5.65688	38.6504	5.65688	598640	0.0210011	9	2789370	2790302	ENSSSCG00000057645	-19.4711	5.46786e-05	0	1	24.9775	1.467e-08	-4.24553	0.302248
AM	SNV	GATK	9	2191270	2191270	T	C	MA0150.2 Nfe2l2	-5	direct	gaagaTgactctgca	-5	direct	gaagaCgactctgca	3.26149e-06	9.29516e-05	0.0350881	ENSSSCG00000057645	9:2191162-2191662	9	2191162	2191662	88.3333	6.73147	5.65688	38.6504	5.65688	598640	0.0210011	9	2789370	2790302	ENSSSCG00000057645	-19.4711	5.46786e-05	0	1	24.9775	1.467e-08	-4.24553	0.302248
AM	SNV	GATK	9	2191270	2191270	T	C	MA0591.1 Bach1::Mafk	-4	direct	aagaTgactctgcag	-4	direct	aagaCgactctgcag	2.32272e-06	5.35129e-05	0.0434049	ENSSSCG00000057645	9:2191162-2191662	9	2191162	2191662	88.3333	6.73147	5.65688	38.6504	5.65688	598640	0.0210011	9	2789370	2790302	ENSSSCG00000057645	-19.4711	5.46786e-05	0	1	24.9775	1.467e-08	-4.24553	0.302248
AM	SNV	GATK	9	2191270	2191270	T	C	MA1520.1 MAF	-4	revcomp	ctgcagagtcAtctt	-4	revcomp	ctgcagagtcGtctt	0.000118764	0.00092438	0.12848	ENSSSCG00000057645	9:2191162-2191662	9	2191162	2191662	88.3333	6.73147	5.65688	38.6504	5.65688	598640	0.0210011	9	2789370	2790302	ENSSSCG00000057645	-19.4711	5.46786e-05	0	1	24.9775	1.467e-08	-4.24553	0.302248
AM	SNV	GATK	9	2191270	2191270	T	C	MA1521.1 MAFA	-4	revcomp	ctgcagagtcAtctt	-4	revcomp	ctgcagagtcGtctt	0.000128683	0.000942443	0.136542	ENSSSCG00000057645	9:2191162-2191662	9	2191162	2191662	88.3333	6.73147	5.65688	38.6504	5.65688	598640	0.0210011	9	2789370	2790302	ENSSSCG00000057645	-19.4711	5.46786e-05	0	1	24.9775	1.467e-08	-4.24553	0.302248
AM	SNV	GATK	9	2191270	2191270	T	C	MA0089.2 MAFG::NFE2L1	-4	direct	aagaTgactctgcagg	-4	direct	aagaCgactctgcagg	6.91577e-06	0.000131331	0.0526592	ENSSSCG00000057645	9:2191162-2191662	9	2191162	2191662	88.3333	6.73147	5.65688	38.6504	5.65688	598640	0.0210011	9	2789370	2790302	ENSSSCG00000057645	-19.4711	5.46786e-05	0	1	24.9775	1.467e-08	-4.24553	0.302248
AM	SNV	GATK	9	2191270	2191270	T	C	MA1128.1 FOSL1::JUN	-3	direct	agaTgactctgca	-3	direct	agaCgactctgca	0.000368372	0.00544673	0.0676317	ENSSSCG00000057645	9:2191162-2191662	9	2191162	2191662	88.3333	6.73147	5.65688	38.6504	5.65688	598640	0.0210011	9	2789370	2790302	ENSSSCG00000057645	-19.4711	5.46786e-05	0	1	24.9775	1.467e-08	-4.24553	0.302248
AM	SNV	GATK	9	2191270	2191270	T	C	MA1130.1 FOSL2::JUN	-2	revcomp	tgcagagtcAtc	-2	revcomp	tgcagagtcGtc	0.00037086	0.00574231	0.0645838	ENSSSCG00000057645	9:2191162-2191662	9	2191162	2191662	88.3333	6.73147	5.65688	38.6504	5.65688	598640	0.0210011	9	2789370	2790302	ENSSSCG00000057645	-19.4711	5.46786e-05	0	1	24.9775	1.467e-08	-4.24553	0.302248
AM	SNV	GATK	9	2191270	2191270	T	C	MA1135.1 FOSB::JUNB	-2	direct	gaTgactctg	-2	direct	gaCgactctg	0.000439644	0.00633717	0.0693755	ENSSSCG00000057645	9:2191162-2191662	9	2191162	2191662	88.3333	6.73147	5.65688	38.6504	5.65688	598640	0.0210011	9	2789370	2790302	ENSSSCG00000057645	-19.4711	5.46786e-05	0	1	24.9775	1.467e-08	-4.24553	0.302248
AM	SNV	GATK	9	2191270	2191270	T	C	MA1633.2 BACH1	-1	direct	aTgactctg	-1	direct	aCgactctg	0.000476837	0.00536346	0.0889047	ENSSSCG00000057645	9:2191162-2191662	9	2191162	2191662	88.3333	6.73147	5.65688	38.6504	5.65688	598640	0.0210011	9	2789370	2790302	ENSSSCG00000057645	-19.4711	5.46786e-05	0	1	24.9775	1.467e-08	-4.24553	0.302248
AM	SNV	GATK	9	2191270	2191270	T	C	MA0478.1 FOSL2	-3	direct	agaTgactctg	-3	direct	agaCgactctg	0.000226498	0.00356293	0.0635707	ENSSSCG00000057645	9:2191162-2191662	9	2191162	2191662	88.3333	6.73147	5.65688	38.6504	5.65688	598640	0.0210011	9	2789370	2790302	ENSSSCG00000057645	-19.4711	5.46786e-05	0	1	24.9775	1.467e-08	-4.24553	0.302248
AM	SNV	GATK	9	2191270	2191270	T	C	MA0659.3 Mafg	-4	direct	aagaTgactctgcag	-4	direct	aagaCgactctgcag	2.92063e-06	5.66496e-05	0.0515561	ENSSSCG00000057645	9:2191162-2191662	9	2191162	2191662	88.3333	6.73147	5.65688	38.6504	5.65688	598640	0.0210011	9	2789370	2790302	ENSSSCG00000057645	-19.4711	5.46786e-05	0	1	24.9775	1.467e-08	-4.24553	0.302248
AM	SNV	GATK	9	2191272	2191272	A	C	MA0659.3 Mafg	-6	direct	aagatgActctgcag	-6	direct	aagatgCctctgcag	2.92063e-06	6.00647e-05	0.0486247	ENSSSCG00000057645	9:2191162-2191662	9	2191162	2191662	88.3333	6.73147	5.65688	38.6504	5.65688	598640	0.0210011	9	2789370	2790302	ENSSSCG00000057645	-19.4711	5.46786e-05	0	1	24.9775	1.467e-08	-4.24553	0.302248
AM	SNV	GATK	9	2191272	2191272	A	C	MA1633.2 BACH1	-3	direct	atgActctg	-3	direct	atgCctctg	0.000476837	0.00536346	0.0889047	ENSSSCG00000057645	9:2191162-2191662	9	2191162	2191662	88.3333	6.73147	5.65688	38.6504	5.65688	598640	0.0210011	9	2789370	2790302	ENSSSCG00000057645	-19.4711	5.46786e-05	0	1	24.9775	1.467e-08	-4.24553	0.302248
AM	SNV	GATK	9	2191272	2191272	A	C	MA1988.1 Atf3	-4	direct	gatgActctgc	-4	direct	gatgCctctgc	0.00049305	0.00733781	0.067193	ENSSSCG00000057645	9:2191162-2191662	9	2191162	2191662	88.3333	6.73147	5.65688	38.6504	5.65688	598640	0.0210011	9	2789370	2790302	ENSSSCG00000057645	-19.4711	5.46786e-05	0	1	24.9775	1.467e-08	-4.24553	0.302248
AM	SNV	GATK	9	2191272	2191272	A	C	MA1128.1 FOSL1::JUN	-5	direct	agatgActctgca	-5	direct	agatgCctctgca	0.000368372	0.00544673	0.0676317	ENSSSCG00000057645	9:2191162-2191662	9	2191162	2191662	88.3333	6.73147	5.65688	38.6504	5.65688	598640	0.0210011	9	2789370	2790302	ENSSSCG00000057645	-19.4711	5.46786e-05	0	1	24.9775	1.467e-08	-4.24553	0.302248
AM	SNV	GATK	9	2191272	2191272	A	C	MA1130.1 FOSL2::JUN	-4	revcomp	tgcagagTcatc	-4	revcomp	tgcagagGcatc	0.00037086	0.00560623	0.0661514	ENSSSCG00000057645	9:2191162-2191662	9	2191162	2191662	88.3333	6.73147	5.65688	38.6504	5.65688	598640	0.0210011	9	2789370	2790302	ENSSSCG00000057645	-19.4711	5.46786e-05	0	1	24.9775	1.467e-08	-4.24553	0.302248
AM	SNV	GATK	9	2191272	2191272	A	C	MA0841.1 NFE2	-4	direct	gatgActctgc	-4	direct	gatgCctctgc	0.000331163	0.00357199	0.0927113	ENSSSCG00000057645	9:2191162-2191662	9	2191162	2191662	88.3333	6.73147	5.65688	38.6504	5.65688	598640	0.0210011	9	2789370	2790302	ENSSSCG00000057645	-19.4711	5.46786e-05	0	1	24.9775	1.467e-08	-4.24553	0.302248
AM	SNV	GATK	9	2191272	2191272	A	C	MA1144.1 FOSL2::JUND	-4	direct	gatgActctg	-4	direct	gatgCctctg	0.000396729	0.00563717	0.0703773	ENSSSCG00000057645	9:2191162-2191662	9	2191162	2191662	88.3333	6.73147	5.65688	38.6504	5.65688	598640	0.0210011	9	2789370	2790302	ENSSSCG00000057645	-19.4711	5.46786e-05	0	1	24.9775	1.467e-08	-4.24553	0.302248
AM	SNV	GATK	9	2191272	2191272	A	C	MA1520.1 MAF	-6	revcomp	ctgcagagTcatctt	-6	revcomp	ctgcagagGcatctt	0.000118764	0.000704075	0.168681	ENSSSCG00000057645	9:2191162-2191662	9	2191162	2191662	88.3333	6.73147	5.65688	38.6504	5.65688	598640	0.0210011	9	2789370	2790302	ENSSSCG00000057645	-19.4711	5.46786e-05	0	1	24.9775	1.467e-08	-4.24553	0.302248
AM	SNV	GATK	9	2191272	2191272	A	C	MA1137.1 FOSL1::JUNB	-5	direct	agatgActctgca	-5	direct	agatgCctctgca	0.000416979	0.00653852	0.0637727	ENSSSCG00000057645	9:2191162-2191662	9	2191162	2191662	88.3333	6.73147	5.65688	38.6504	5.65688	598640	0.0210011	9	2789370	2790302	ENSSSCG00000057645	-19.4711	5.46786e-05	0	1	24.9775	1.467e-08	-4.24553	0.302248
AM	SNV	GATK	9	2191272	2191272	A	C	MA1141.1 FOS::JUND	-5	revcomp	tgcagagTcatct	-5	revcomp	tgcagagGcatct	0.000336125	0.00459459	0.0731567	ENSSSCG00000057645	9:2191162-2191662	9	2191162	2191662	88.3333	6.73147	5.65688	38.6504	5.65688	598640	0.0210011	9	2789370	2790302	ENSSSCG00000057645	-19.4711	5.46786e-05	0	1	24.9775	1.467e-08	-4.24553	0.302248
AM	SNV	GATK	9	2191272	2191272	A	C	MA0476.1 FOS	-4	revcomp	gcagagTcatc	-4	revcomp	gcagagGcatc	0.000356197	0.0047915	0.0743395	ENSSSCG00000057645	9:2191162-2191662	9	2191162	2191662	88.3333	6.73147	5.65688	38.6504	5.65688	598640	0.0210011	9	2789370	2790302	ENSSSCG00000057645	-19.4711	5.46786e-05	0	1	24.9775	1.467e-08	-4.24553	0.302248
AM	SNV	GATK	9	2191272	2191272	A	C	MA0478.1 FOSL2	-5	direct	agatgActctg	-5	direct	agatgCctctg	0.000226498	0.00315928	0.0716927	ENSSSCG00000057645	9:2191162-2191662	9	2191162	2191662	88.3333	6.73147	5.65688	38.6504	5.65688	598640	0.0210011	9	2789370	2790302	ENSSSCG00000057645	-19.4711	5.46786e-05	0	1	24.9775	1.467e-08	-4.24553	0.302248
AM	SNV	GATK	9	2191272	2191272	A	C	MA0501.1 MAF::NFE2	-3	direct	atgActctgcaggaa	-3	direct	atgCctctgcaggaa	9.54326e-06	0.00018677	0.0510963	ENSSSCG00000057645	9:2191162-2191662	9	2191162	2191662	88.3333	6.73147	5.65688	38.6504	5.65688	598640	0.0210011	9	2789370	2790302	ENSSSCG00000057645	-19.4711	5.46786e-05	0	1	24.9775	1.467e-08	-4.24553	0.302248
AM	SNV	GATK	9	2191272	2191272	A	C	MA0150.2 Nfe2l2	-7	direct	gaagatgActctgca	-7	direct	gaagatgCctctgca	3.26149e-06	9.29516e-05	0.0350881	ENSSSCG00000057645	9:2191162-2191662	9	2191162	2191662	88.3333	6.73147	5.65688	38.6504	5.65688	598640	0.0210011	9	2789370	2790302	ENSSSCG00000057645	-19.4711	5.46786e-05	0	1	24.9775	1.467e-08	-4.24553	0.302248
AM	SNV	GATK	9	2191272	2191272	A	C	MA0591.1 Bach1::Mafk	-6	direct	aagatgActctgcag	-6	direct	aagatgCctctgcag	2.32272e-06	5.68135e-05	0.0408832	ENSSSCG00000057645	9:2191162-2191662	9	2191162	2191662	88.3333	6.73147	5.65688	38.6504	5.65688	598640	0.0210011	9	2789370	2790302	ENSSSCG00000057645	-19.4711	5.46786e-05	0	1	24.9775	1.467e-08	-4.24553	0.302248
AM	SNV	GATK	9	2191272	2191272	A	C	MA1135.1 FOSB::JUNB	-4	direct	gatgActctg	-4	direct	gatgCctctg	0.000439644	0.00633717	0.0693755	ENSSSCG00000057645	9:2191162-2191662	9	2191162	2191662	88.3333	6.73147	5.65688	38.6504	5.65688	598640	0.0210011	9	2789370	2790302	ENSSSCG00000057645	-19.4711	5.46786e-05	0	1	24.9775	1.467e-08	-4.24553	0.302248
AM	SNV	GATK	9	2191272	2191272	A	C	MA0089.2 MAFG::NFE2L1	-6	direct	aagatgActctgcagg	-6	direct	aagatgCctctgcagg	6.91577e-06	0.000131331	0.0526592	ENSSSCG00000057645	9:2191162-2191662	9	2191162	2191662	88.3333	6.73147	5.65688	38.6504	5.65688	598640	0.0210011	9	2789370	2790302	ENSSSCG00000057645	-19.4711	5.46786e-05	0	1	24.9775	1.467e-08	-4.24553	0.302248
AM	SNV	GATK	9	3316790	3316790	C	T	MA0825.1 MNT	-4	revcomp	cgcacGtgca	-4	revcomp	cgcacAtgca	6.77109e-05	0.00147533	0.0458953	ENSSSCG00000014626	9:3316355-3316855	9	3316355	3316855	147.5	11.9125	5.60291	34.9824	5.60291	28155	0.026324	9	3288172	3297047	HPX	-3.30701	0.0483024	-3.75077	0.0379309	-1.84998	0.197366	-1.40622	0.306027
AM	SNV	GATK	9	3316790	3316790	C	T	MA1106.1 HIF1A	-3	direct	gcaCgtgcgt	-3	direct	gcaTgtgcgt	4.3869e-05	0.00175285	0.0250272	ENSSSCG00000014626	9:3316355-3316855	9	3316355	3316855	147.5	11.9125	5.60291	34.9824	5.60291	28155	0.026324	9	3288172	3297047	HPX	-3.30701	0.0483024	-3.75077	0.0379309	-1.84998	0.197366	-1.40622	0.306027
AM	SNV	GATK	9	3316790	3316790	C	T	MA1464.1 ARNT2	-4	direct	tgcaCgtgcg	-4	direct	tgcaTgtgcg	0.000235558	0.00374317	0.0629299	ENSSSCG00000014626	9:3316355-3316855	9	3316355	3316855	147.5	11.9125	5.60291	34.9824	5.60291	28155	0.026324	9	3288172	3297047	HPX	-3.30701	0.0483024	-3.75077	0.0379309	-1.84998	0.197366	-1.40622	0.306027
AM	SNV	GATK	9	3316790	3316790	C	T	MA0603.1 Arntl	-3	revcomp	acgcacGtgc	-3	revcomp	acgcacAtgc	0.000369072	0.00425148	0.0868102	ENSSSCG00000014626	9:3316355-3316855	9	3316355	3316855	147.5	11.9125	5.60291	34.9824	5.60291	28155	0.026324	9	3288172	3297047	HPX	-3.30701	0.0483024	-3.75077	0.0379309	-1.84998	0.197366	-1.40622	0.306027
AM	SNV	GATK	9	3316790	3316790	C	T	MA1154.1 ZNF282	-13	direct	ttttgcctttgcaCgtg	-13	direct	ttttgcctttgcaTgtg	0.0003718	0.00278746	0.133383	ENSSSCG00000014626	9:3316355-3316855	9	3316355	3316855	147.5	11.9125	5.60291	34.9824	5.60291	28155	0.026324	9	3288172	3297047	HPX	-3.30701	0.0483024	-3.75077	0.0379309	-1.84998	0.197366	-1.40622	0.306027
AM	SNV	GATK	9	3316790	3316790	C	T	MA0632.2 TCFL5	-5	revcomp	gcacGtgcaa	-1	revcomp	acacgcacAt	0.000252724	0.00171661	0.147222	ENSSSCG00000014626	9:3316355-3316855	9	3316355	3316855	147.5	11.9125	5.60291	34.9824	5.60291	28155	0.026324	9	3288172	3297047	HPX	-3.30701	0.0483024	-3.75077	0.0379309	-1.84998	0.197366	-1.40622	0.306027
AM	SNV	GATK	9	3316790	3316790	C	T	MA1108.2 MXI1	-4	direct	tgcaCgtgcg	-4	revcomp	cgcacAtgca	0.00195599	0.000198364	9.86058	ENSSSCG00000014626	9:3316355-3316855	9	3316355	3316855	147.5	11.9125	5.60291	34.9824	5.60291	28155	0.026324	9	3288172	3297047	HPX	-3.30701	0.0483024	-3.75077	0.0379309	-1.84998	0.197366	-1.40622	0.306027
AM	SNV	GATK	9	3316790	3316790	C	T	MA0627.2 POU2F3	-9	revcomp	cacGtgcaaaggc	-9	revcomp	cacAtgcaaaggc	0.00185297	0.000133574	13.8723	ENSSSCG00000014626	9:3316355-3316855	9	3316355	3316855	147.5	11.9125	5.60291	34.9824	5.60291	28155	0.026324	9	3288172	3297047	HPX	-3.30701	0.0483024	-3.75077	0.0379309	-1.84998	0.197366	-1.40622	0.306027
AM	SNV	GATK	9	3316790	3316790	C	T	MA0819.2 CLOCK	-3	revcomp	acgcacGtgc	-3	revcomp	acgcacAtgc	0.000151634	0.00203323	0.0745779	ENSSSCG00000014626	9:3316355-3316855	9	3316355	3316855	147.5	11.9125	5.60291	34.9824	5.60291	28155	0.026324	9	3288172	3297047	HPX	-3.30701	0.0483024	-3.75077	0.0379309	-1.84998	0.197366	-1.40622	0.306027
AM	SNV	GATK	9	3316790	3316790	C	T	MA0821.2 HES5	-4	direct	tgcaCgtgcg	-4	direct	tgcaTgtgcg	0.000112534	0.00217056	0.0518453	ENSSSCG00000014626	9:3316355-3316855	9	3316355	3316855	147.5	11.9125	5.60291	34.9824	5.60291	28155	0.026324	9	3288172	3297047	HPX	-3.30701	0.0483024	-3.75077	0.0379309	-1.84998	0.197366	-1.40622	0.306027
AM	SNV	GATK	9	3316790	3316790	C	T	MA0823.1 HEY1	-4	revcomp	cgcacGtgca	-4	revcomp	cgcacAtgca	7.43866e-05	0.00170994	0.0435025	ENSSSCG00000014626	9:3316355-3316855	9	3316355	3316855	147.5	11.9125	5.60291	34.9824	5.60291	28155	0.026324	9	3288172	3297047	HPX	-3.30701	0.0483024	-3.75077	0.0379309	-1.84998	0.197366	-1.40622	0.306027
AM	SNV	GATK	9	3316790	3316790	C	T	MA0058.3 MAX	-4	revcomp	cgcacGtgca	-4	revcomp	cgcacAtgca	0.000153542	0.00248051	0.0618993	ENSSSCG00000014626	9:3316355-3316855	9	3316355	3316855	147.5	11.9125	5.60291	34.9824	5.60291	28155	0.026324	9	3288172	3297047	HPX	-3.30701	0.0483024	-3.75077	0.0379309	-1.84998	0.197366	-1.40622	0.306027
AM	SNV	GATK	9	3316790	3316790	C	T	MA0147.3 MYC	-5	revcomp	acgcacGtgcaa	-5	direct	ttgcaTgtgcgt	0.000241041	0.00292146	0.082507	ENSSSCG00000014626	9:3316355-3316855	9	3316355	3316855	147.5	11.9125	5.60291	34.9824	5.60291	28155	0.026324	9	3288172	3297047	HPX	-3.30701	0.0483024	-3.75077	0.0379309	-1.84998	0.197366	-1.40622	0.306027
AM	SNV	GATK	9	3316790	3316790	C	T	MA0004.1 Arnt	-2	direct	caCgtg	-2	direct	caTgtg	0.000244141	0.00463867	0.0526316	ENSSSCG00000014626	9:3316355-3316855	9	3316355	3316855	147.5	11.9125	5.60291	34.9824	5.60291	28155	0.026324	9	3288172	3297047	HPX	-3.30701	0.0483024	-3.75077	0.0379309	-1.84998	0.197366	-1.40622	0.306027
AM	SNV	GATK	9	3316790	3316790	C	T	MA0259.1 ARNT::HIF1A	-3	direct	gcaCgtgc	-3	direct	gcaTgtgc	4.57764e-05	0.00236511	0.0193548	ENSSSCG00000014626	9:3316355-3316855	9	3316355	3316855	147.5	11.9125	5.60291	34.9824	5.60291	28155	0.026324	9	3288172	3297047	HPX	-3.30701	0.0483024	-3.75077	0.0379309	-1.84998	0.197366	-1.40622	0.306027
AM	SNV	GATK	9	3316790	3316790	C	T	MA0472.2 EGR2	-4	revcomp	acgcacGtgca	-4	revcomp	acgcacAtgca	0.00197053	0.000190496	10.3442	ENSSSCG00000014626	9:3316355-3316855	9	3316355	3316855	147.5	11.9125	5.60291	34.9824	5.60291	28155	0.026324	9	3288172	3297047	HPX	-3.30701	0.0483024	-3.75077	0.0379309	-1.84998	0.197366	-1.40622	0.306027
AM	SNV	GATK	9	3316790	3316790	C	T	MA0622.1 Mlxip	-3	direct	gcaCgtgc	-3	direct	gcaTgtgc	0.000137329	0.00271606	0.0505618	ENSSSCG00000014626	9:3316355-3316855	9	3316355	3316855	147.5	11.9125	5.60291	34.9824	5.60291	28155	0.026324	9	3288172	3297047	HPX	-3.30701	0.0483024	-3.75077	0.0379309	-1.84998	0.197366	-1.40622	0.306027
AM	SNV	GATK	9	3316790	3316790	C	T	MA0626.1 Npas2	-4	revcomp	cgcacGtgca	-4	revcomp	cgcacAtgca	0.000106812	0.00131989	0.0809249	ENSSSCG00000014626	9:3316355-3316855	9	3316355	3316855	147.5	11.9125	5.60291	34.9824	5.60291	28155	0.026324	9	3288172	3297047	HPX	-3.30701	0.0483024	-3.75077	0.0379309	-1.84998	0.197366	-1.40622	0.306027
AM	SNV	GATK	9	3316790	3316790	C	T	MA0649.1 HEY2	-4	direct	tgcaCgtgcg	-4	revcomp	cgcacAtgca	0.00017643	0.00309753	0.0569581	ENSSSCG00000014626	9:3316355-3316855	9	3316355	3316855	147.5	11.9125	5.60291	34.9824	5.60291	28155	0.026324	9	3288172	3297047	HPX	-3.30701	0.0483024	-3.75077	0.0379309	-1.84998	0.197366	-1.40622	0.306027
AM	SNV	GATK	9	3316790	3316790	C	T	MA0616.2 HES2	-4	direct	tgcaCgtgcg	-4	direct	tgcaTgtgcg	9.15527e-05	0.00177765	0.0515021	ENSSSCG00000014626	9:3316355-3316855	9	3316355	3316855	147.5	11.9125	5.60291	34.9824	5.60291	28155	0.026324	9	3288172	3297047	HPX	-3.30701	0.0483024	-3.75077	0.0379309	-1.84998	0.197366	-1.40622	0.306027
AM	SNV	GATK	9	3316790	3316790	C	T	MA0732.1 EGR3	-6	revcomp	acacgcacGtgcaaa	-6	revcomp	acacgcacAtgcaaa	0.00114415	0.000208802	5.47959	ENSSSCG00000014626	9:3316355-3316855	9	3316355	3316855	147.5	11.9125	5.60291	34.9824	5.60291	28155	0.026324	9	3288172	3297047	HPX	-3.30701	0.0483024	-3.75077	0.0379309	-1.84998	0.197366	-1.40622	0.306027
AM	SNV	GATK	9	3316790	3316790	C	T	MA0464.2 BHLHE40	-4	revcomp	cgcacGtgca	-4	revcomp	cgcacAtgca	7.82013e-05	0.00169086	0.0462493	ENSSSCG00000014626	9:3316355-3316855	9	3316355	3316855	147.5	11.9125	5.60291	34.9824	5.60291	28155	0.026324	9	3288172	3297047	HPX	-3.30701	0.0483024	-3.75077	0.0379309	-1.84998	0.197366	-1.40622	0.306027
AM	SNV	GATK	9	3316790	3316790	C	T	MA1494.1 HNF4A	-12	revcomp	acGtgcaaaggcaaa	-12	revcomp	acAtgcaaaggcaaa	0.000283254	0.00226167	0.125241	ENSSSCG00000014626	9:3316355-3316855	9	3316355	3316855	147.5	11.9125	5.60291	34.9824	5.60291	28155	0.026324	9	3288172	3297047	HPX	-3.30701	0.0483024	-3.75077	0.0379309	-1.84998	0.197366	-1.40622	0.306027
AM	SNV	GATK	9	3316790	3316790	C	T	MA1099.2 HES1	-4	direct	tgcaCgtgcg	-4	direct	tgcaTgtgcg	0.000141144	0.00284195	0.0496644	ENSSSCG00000014626	9:3316355-3316855	9	3316355	3316855	147.5	11.9125	5.60291	34.9824	5.60291	28155	0.026324	9	3288172	3297047	HPX	-3.30701	0.0483024	-3.75077	0.0379309	-1.84998	0.197366	-1.40622	0.306027
AM	SNV	GATK	9	45393745	45393745	C	T	MA1525.2 NFATC4	-6	revcomp	gacGgaaact	-6	revcomp	gacAgaaact	6.48499e-05	0.00183678	0.0353063	ENSSSCG00000015086	9:45393439-45393939	9	45393439	45393939	86.5	20.0589	11.5675	43.0406	11.5675	6661	0.020802	9	45400600	45435916	TMPRSS4	0.390414	0.756013	2.87936	0.0485242	1.11453	0.344437	-1.37442	0.191761
AM	SNV	GATK	9	45393745	45393745	C	T	MA0815.1 TFAP2C	-3	direct	ttcCgtcagggca	-3	direct	ttcTgtcagggca	8.83788e-05	0.00157754	0.0560231	ENSSSCG00000015086	9:45393439-45393939	9	45393439	45393939	86.5	20.0589	11.5675	43.0406	11.5675	6661	0.020802	9	45400600	45435916	TMPRSS4	0.390414	0.756013	2.87936	0.0485242	1.11453	0.344437	-1.37442	0.191761
AM	SNV	GATK	9	45393745	45393745	C	T	MA0774.1 MEIS2	-2	revcomp	ctgacGga	-2	revcomp	ctgacAga	0.00567627	0.000305176	18.6	ENSSSCG00000015086	9:45393439-45393939	9	45393439	45393939	86.5	20.0589	11.5675	43.0406	11.5675	6661	0.020802	9	45400600	45435916	TMPRSS4	0.390414	0.756013	2.87936	0.0485242	1.11453	0.344437	-1.37442	0.191761
AM	SNV	GATK	9	45393745	45393745	C	T	MA0003.4 TFAP2A	-4	direct	tttcCgtcagggca	-4	direct	tttcTgtcagggca	0.00043574	0.00545538	0.0798734	ENSSSCG00000015086	9:45393439-45393939	9	45393439	45393939	86.5	20.0589	11.5675	43.0406	11.5675	6661	0.020802	9	45400600	45435916	TMPRSS4	0.390414	0.756013	2.87936	0.0485242	1.11453	0.344437	-1.37442	0.191761
AM	SNV	GATK	9	45393745	45393745	C	T	MA0107.1 RELA	-9	direct	gggagtttcC	-9	direct	gggagtttcT	2.86102e-06	0.000133514	0.0214286	ENSSSCG00000015086	9:45393439-45393939	9	45393439	45393939	86.5	20.0589	11.5675	43.0406	11.5675	6661	0.020802	9	45400600	45435916	TMPRSS4	0.390414	0.756013	2.87936	0.0485242	1.11453	0.344437	-1.37442	0.191761
AM	SNV	GATK	9	45393745	45393745	C	T	MA0872.1 TFAP2A	-3	revcomp	tgccctgacGgaa	-3	revcomp	tgccctgacAgaa	8.06153e-05	0.00150619	0.0535225	ENSSSCG00000015086	9:45393439-45393939	9	45393439	45393939	86.5	20.0589	11.5675	43.0406	11.5675	6661	0.020802	9	45400600	45435916	TMPRSS4	0.390414	0.756013	2.87936	0.0485242	1.11453	0.344437	-1.37442	0.191761
AM	SNV	GATK	9	45393745	45393745	C	T	MA1646.1 OSR2	-7	revcomp	tgacGgaaactc	-7	revcomp	tgacAgaaactc	0.00420421	0.000383854	10.9526	ENSSSCG00000015086	9:45393439-45393939	9	45393439	45393939	86.5	20.0589	11.5675	43.0406	11.5675	6661	0.020802	9	45400600	45435916	TMPRSS4	0.390414	0.756013	2.87936	0.0485242	1.11453	0.344437	-1.37442	0.191761
AM	SNV	GATK	9	45393745	45393745	C	T	MA0101.1 REL	-9	direct	gggagtttcC	-9	direct	gggagtttcT	2.57492e-05	0.000875473	0.0294118	ENSSSCG00000015086	9:45393439-45393939	9	45393439	45393939	86.5	20.0589	11.5675	43.0406	11.5675	6661	0.020802	9	45400600	45435916	TMPRSS4	0.390414	0.756013	2.87936	0.0485242	1.11453	0.344437	-1.37442	0.191761
AM	SNV	GATK	9	45393745	45393745	C	T	MA0498.2 MEIS1	-1	revcomp	ctgacGg	-1	revcomp	ctgacAg	0.00189209	0.000183105	10.3333	ENSSSCG00000015086	9:45393439-45393939	9	45393439	45393939	86.5	20.0589	11.5675	43.0406	11.5675	6661	0.020802	9	45400600	45435916	TMPRSS4	0.390414	0.756013	2.87936	0.0485242	1.11453	0.344437	-1.37442	0.191761
AM	SNV	GATK	9	45393745	45393745	C	T	MA0625.2 NFATC3	-6	revcomp	acGgaaact	-6	revcomp	acAgaaact	8.7738e-05	0.0045166	0.0194257	ENSSSCG00000015086	9:45393439-45393939	9	45393439	45393939	86.5	20.0589	11.5675	43.0406	11.5675	6661	0.020802	9	45400600	45435916	TMPRSS4	0.390414	0.756013	2.87936	0.0485242	1.11453	0.344437	-1.37442	0.191761
ML	SNV	GATK	13	29430564	29430564	T	C	MA1107.2 KLF9	-10	revcomp	cagccAcagcctatcc	-10	revcomp	cagccGcagcctatcc	0.000212921	0.00192286	0.110731	ENSSSCG00000029879	13:29430398-29430898	13	29430398	29430898	80.1667	11.3119	5.72276	40.0777	5.72276	14155	0.0467203	13	29413886	29445739	LTF	0.175885	0.899521	2.26209	0.13919	-0.737069	0.556297	-2.82327	0.0169578
ML	SNV	GATK	13	29430564	29430564	T	C	MA0506.2 Nrf1	-5	direct	ggctgTggctgagct	-5	direct	ggctgCggctgagct	0.00149409	0.000136027	10.9838	ENSSSCG00000029879	13:29430398-29430898	13	29430398	29430898	80.1667	11.3119	5.72276	40.0777	5.72276	14155	0.0467203	13	29413886	29445739	LTF	0.175885	0.899521	2.26209	0.13919	-0.737069	0.556297	-2.82327	0.0169578
ML	SNV	GATK	13	29430564	29430564	T	C	MA0002.2 Runx1	-5	direct	ggctgTggctg	-5	direct	ggctgCggctg	0.000123024	0.00181198	0.0678947	ENSSSCG00000029879	13:29430398-29430898	13	29430398	29430898	80.1667	11.3119	5.72276	40.0777	5.72276	14155	0.0467203	13	29413886	29445739	LTF	0.175885	0.899521	2.26209	0.13919	-0.737069	0.556297	-2.82327	0.0169578
ML	SNV	GATK	18	5888414	5888414	C	A	MA0599.1 KLF5	-8	direct	gccccgccCc	-3	direct	gccAcgcccc	1.90735e-06	2.19345e-05	0.0869565	ENSSSCG00000042794	18:5888150-5888650	18	5888150	5888650	153.167	1.69367	2.3203	44.711	2.3203	1358457	0.0254768	18	4474494	4529772	ENSSSCG00000042794	-19.14	8.42643e-05	0	1	0	1	-21.5273	2.14945e-07
ML	SNV	GATK	18	5888414	5888414	C	A	MA0657.1 KLF13	-5	direct	ccgccCcgcccccgcagg	-5	direct	ccgccAcgcccccgcagg	0.00092446	8.55942e-05	10.8005	ENSSSCG00000042794	18:5888150-5888650	18	5888150	5888650	153.167	1.69367	2.3203	44.711	2.3203	1358457	0.0254768	18	4474494	4529772	ENSSSCG00000042794	-19.14	8.42643e-05	0	1	0	1	-21.5273	2.14945e-07
ML	SNV	GATK	18	5888414	5888414	C	A	MA0735.1 GLIS1	-9	direct	agccccgccCcgcccc	-9	direct	agccccgccAcgcccc	0.00138166	0.000192525	7.17649	ENSSSCG00000042794	18:5888150-5888650	18	5888150	5888650	153.167	1.69367	2.3203	44.711	2.3203	1358457	0.0254768	18	4474494	4529772	ENSSSCG00000042794	-19.14	8.42643e-05	0	1	0	1	-21.5273	2.14945e-07
ML	SNV	GATK	18	5888414	5888414	C	A	MA0741.1 KLF16	-3	direct	gccCcgccccc	-3	direct	gccAcgccccc	2.14577e-06	2.38419e-07	9	ENSSSCG00000042794	18:5888150-5888650	18	5888150	5888650	153.167	1.69367	2.3203	44.711	2.3203	1358457	0.0254768	18	4474494	4529772	ENSSSCG00000042794	-19.14	8.42643e-05	0	1	0	1	-21.5273	2.14945e-07
ML	SNV	GATK	18	5888414	5888414	C	A	MA0747.1 SP8	-3	direct	gccCcgcccccg	-3	direct	gccAcgcccccg	3.57628e-05	2.38419e-06	15	ENSSSCG00000042794	18:5888150-5888650	18	5888150	5888650	153.167	1.69367	2.3203	44.711	2.3203	1358457	0.0254768	18	4474494	4529772	ENSSSCG00000042794	-19.14	8.42643e-05	0	1	0	1	-21.5273	2.14945e-07
ML	SNV	GATK	18	5888414	5888414	C	A	MA0106.3 TP53	-3	direct	gccCcgcccccgcaggtg	-3	direct	gccAcgcccccgcaggtg	0.00257773	0.000400542	6.4356	ENSSSCG00000042794	18:5888150-5888650	18	5888150	5888650	153.167	1.69367	2.3203	44.711	2.3203	1358457	0.0254768	18	4474494	4529772	ENSSSCG00000042794	-19.14	8.42643e-05	0	1	0	1	-21.5273	2.14945e-07
ML	SNV	GATK	18	5888414	5888414	C	A	MA1474.1 CREB3L4	-4	direct	cgccCcgccccc	-4	direct	cgccAcgccccc	0.00244284	0.000146329	16.6941	ENSSSCG00000042794	18:5888150-5888650	18	5888150	5888650	153.167	1.69367	2.3203	44.711	2.3203	1358457	0.0254768	18	4474494	4529772	ENSSSCG00000042794	-19.14	8.42643e-05	0	1	0	1	-21.5273	2.14945e-07
ML	SNV	GATK	18	5888414	5888414	C	A	MA1512.1 KLF11	-3	direct	gccCcgccccc	-3	direct	gccAcgccccc	1.43051e-05	4.76837e-07	30	ENSSSCG00000042794	18:5888150-5888650	18	5888150	5888650	153.167	1.69367	2.3203	44.711	2.3203	1358457	0.0254768	18	4474494	4529772	ENSSSCG00000042794	-19.14	8.42643e-05	0	1	0	1	-21.5273	2.14945e-07
ML	SNV	GATK	18	5888414	5888414	C	A	MA1513.1 KLF15	-3	direct	gccCcgccccc	-3	direct	gccAcgccccc	2.38419e-07	3.02792e-05	0.00787402	ENSSSCG00000042794	18:5888150-5888650	18	5888150	5888650	153.167	1.69367	2.3203	44.711	2.3203	1358457	0.0254768	18	4474494	4529772	ENSSSCG00000042794	-19.14	8.42643e-05	0	1	0	1	-21.5273	2.14945e-07
ML	SNV	GATK	18	5888414	5888414	C	A	MA1516.1 KLF3	-9	direct	agccccgccCc	-4	direct	cgccAcgcccc	0.000109673	2.00272e-05	5.47619	ENSSSCG00000042794	18:5888150-5888650	18	5888150	5888650	153.167	1.69367	2.3203	44.711	2.3203	1358457	0.0254768	18	4474494	4529772	ENSSSCG00000042794	-19.14	8.42643e-05	0	1	0	1	-21.5273	2.14945e-07
ML	SNV	GATK	18	5888414	5888414	C	A	MA1517.1 KLF6	-4	direct	cgccCcgcccc	-4	direct	cgccAcgcccc	8.2016e-05	2.86102e-06	28.6667	ENSSSCG00000042794	18:5888150-5888650	18	5888150	5888650	153.167	1.69367	2.3203	44.711	2.3203	1358457	0.0254768	18	4474494	4529772	ENSSSCG00000042794	-19.14	8.42643e-05	0	1	0	1	-21.5273	2.14945e-07
ML	SNV	GATK	18	5888414	5888414	C	A	MA1522.1 MAZ	-4	direct	cgccCcgcccc	-9	direct	agccccgccAc	7.00951e-05	0.000662804	0.105755	ENSSSCG00000042794	18:5888150-5888650	18	5888150	5888650	153.167	1.69367	2.3203	44.711	2.3203	1358457	0.0254768	18	4474494	4529772	ENSSSCG00000042794	-19.14	8.42643e-05	0	1	0	1	-21.5273	2.14945e-07
ML	SNV	GATK	18	5888414	5888414	C	A	MA1099.2 HES1	-8	revcomp	gGggcggggc	-3	revcomp	ggggcgTggc	0.00424576	0.000379562	11.1859	ENSSSCG00000042794	18:5888150-5888650	18	5888150	5888650	153.167	1.69367	2.3203	44.711	2.3203	1358457	0.0254768	18	4474494	4529772	ENSSSCG00000042794	-19.14	8.42643e-05	0	1	0	1	-21.5273	2.14945e-07
ML	SNV	GATK	18	5888414	5888414	C	A	MA0746.2 SP3	-4	direct	cgccCcgcccccg	-4	direct	cgccAcgcccccg	8.70228e-06	6.25849e-07	13.9048	ENSSSCG00000042794	18:5888150-5888650	18	5888150	5888650	153.167	1.69367	2.3203	44.711	2.3203	1358457	0.0254768	18	4474494	4529772	ENSSSCG00000042794	-19.14	8.42643e-05	0	1	0	1	-21.5273	2.14945e-07
ML	SNV	GATK	18	5888414	5888414	C	A	MA0632.2 TCFL5	-2	direct	ccCcgccccc	-2	direct	ccAcgccccc	0.00301361	0.000478745	6.29482	ENSSSCG00000042794	18:5888150-5888650	18	5888150	5888650	153.167	1.69367	2.3203	44.711	2.3203	1358457	0.0254768	18	4474494	4529772	ENSSSCG00000042794	-19.14	8.42643e-05	0	1	0	1	-21.5273	2.14945e-07
ML	SNV	GATK	18	5888414	5888414	C	A	MA0753.2 ZNF740	-5	direct	ccgccCcgccccc	-11	direct	ctagccccgccAc	1.88053e-05	0.000159755	0.117713	ENSSSCG00000042794	18:5888150-5888650	18	5888150	5888650	153.167	1.69367	2.3203	44.711	2.3203	1358457	0.0254768	18	4474494	4529772	ENSSSCG00000042794	-19.14	8.42643e-05	0	1	0	1	-21.5273	2.14945e-07
ML	SNV	GATK	18	5888414	5888414	C	A	MA1653.1 ZNF148	-4	direct	cgccCcgccccc	-4	direct	cgccAcgccccc	6.97374e-06	0.000181913	0.0383355	ENSSSCG00000042794	18:5888150-5888650	18	5888150	5888650	153.167	1.69367	2.3203	44.711	2.3203	1358457	0.0254768	18	4474494	4529772	ENSSSCG00000042794	-19.14	8.42643e-05	0	1	0	1	-21.5273	2.14945e-07
ML	SNV	GATK	18	5888414	5888414	C	A	MA0471.2 E2F6	-5	revcomp	gggggcgGggcgg	-10	revcomp	cgTggcggggcta	0.000332683	0.0020958	0.158738	ENSSSCG00000042794	18:5888150-5888650	18	5888150	5888650	153.167	1.69367	2.3203	44.711	2.3203	1358457	0.0254768	18	4474494	4529772	ENSSSCG00000042794	-19.14	8.42643e-05	0	1	0	1	-21.5273	2.14945e-07
ML	SNV	GATK	18	5888414	5888414	C	A	MA0039.4 KLF4	-4	direct	cgccCcgccccc	-4	direct	cgccAcgccccc	1.5676e-05	0.000372112	0.0421272	ENSSSCG00000042794	18:5888150-5888650	18	5888150	5888650	153.167	1.69367	2.3203	44.711	2.3203	1358457	0.0254768	18	4474494	4529772	ENSSSCG00000042794	-19.14	8.42643e-05	0	1	0	1	-21.5273	2.14945e-07
ML	SNV	GATK	18	5888414	5888414	C	A	MA1107.2 KLF9	-5	direct	ccgccCcgcccccgca	-5	direct	ccgccAcgcccccgca	0.000167751	1.34057e-05	12.5134	ENSSSCG00000042794	18:5888150-5888650	18	5888150	5888650	153.167	1.69367	2.3203	44.711	2.3203	1358457	0.0254768	18	4474494	4529772	ENSSSCG00000042794	-19.14	8.42643e-05	0	1	0	1	-21.5273	2.14945e-07
ML	SNV	GATK	18	5888414	5888414	C	A	MA1959.1 KLF7	-7	revcomp	gGggcgggg	-2	revcomp	ggggcgTgg	3.8147e-06	2.67029e-05	0.142857	ENSSSCG00000042794	18:5888150-5888650	18	5888150	5888650	153.167	1.69367	2.3203	44.711	2.3203	1358457	0.0254768	18	4474494	4529772	ENSSSCG00000042794	-19.14	8.42643e-05	0	1	0	1	-21.5273	2.14945e-07
ML	SNV	GATK	18	5888414	5888414	C	A	MA1961.1 PATZ1	-3	revcomp	cgggggcgGggc	-8	revcomp	gcgTggcggggc	4.76837e-07	2.69413e-05	0.0176991	ENSSSCG00000042794	18:5888150-5888650	18	5888150	5888650	153.167	1.69367	2.3203	44.711	2.3203	1358457	0.0254768	18	4474494	4529772	ENSSSCG00000042794	-19.14	8.42643e-05	0	1	0	1	-21.5273	2.14945e-07
ML	SNV	GATK	18	5888414	5888414	C	A	MA0079.5 SP1	-7	revcomp	gGggcgggg	-2	revcomp	ggggcgTgg	3.8147e-06	6.48499e-05	0.0588235	ENSSSCG00000042794	18:5888150-5888650	18	5888150	5888650	153.167	1.69367	2.3203	44.711	2.3203	1358457	0.0254768	18	4474494	4529772	ENSSSCG00000042794	-19.14	8.42643e-05	0	1	0	1	-21.5273	2.14945e-07
ML	SNV	GATK	18	5888414	5888414	C	A	MA0493.2 KLF1	-7	revcomp	gGggcgggg	-2	revcomp	ggggcgTgg	3.8147e-06	3.05176e-05	0.125	ENSSSCG00000042794	18:5888150-5888650	18	5888150	5888650	153.167	1.69367	2.3203	44.711	2.3203	1358457	0.0254768	18	4474494	4529772	ENSSSCG00000042794	-19.14	8.42643e-05	0	1	0	1	-21.5273	2.14945e-07
ML	SNV	GATK	18	5888414	5888414	C	A	MA0516.3 SP2	-7	revcomp	gGggcgggg	-7	revcomp	gTggcgggg	3.8147e-06	5.34058e-05	0.0714286	ENSSSCG00000042794	18:5888150-5888650	18	5888150	5888650	153.167	1.69367	2.3203	44.711	2.3203	1358457	0.0254768	18	4474494	4529772	ENSSSCG00000042794	-19.14	8.42643e-05	0	1	0	1	-21.5273	2.14945e-07
ML	SNV	GATK	18	5888414	5888414	C	A	MA0685.2 SP4	-7	revcomp	gGggcgggg	-2	revcomp	ggggcgTgg	3.8147e-06	4.95911e-05	0.0769231	ENSSSCG00000042794	18:5888150-5888650	18	5888150	5888650	153.167	1.69367	2.3203	44.711	2.3203	1358457	0.0254768	18	4474494	4529772	ENSSSCG00000042794	-19.14	8.42643e-05	0	1	0	1	-21.5273	2.14945e-07
ML	SNV	GATK	18	5888414	5888414	C	A	MA1630.2 ZNF281	-4	revcomp	gggggcgGggcg	-4	revcomp	gggggcgTggcg	1.19209e-06	4.77433e-05	0.0249688	ENSSSCG00000042794	18:5888150-5888650	18	5888150	5888650	153.167	1.69367	2.3203	44.711	2.3203	1358457	0.0254768	18	4474494	4529772	ENSSSCG00000042794	-19.14	8.42643e-05	0	1	0	1	-21.5273	2.14945e-07
ML	SNV	GATK	3	94216314	94216314	C	T	MA0071.1 RORA	-5	revcomp	atctGgggca	-5	revcomp	atctAgggca	0.00153732	0.000193596	7.94089	ENSSSCG00000056286	3:94216247-94216747	3	94216247	94216747	81.1667	24.3641	18.7267	43.7405	18.7267	37597	0.0469067	3	94254344	94257679	ENSSSCG00000056286	1.83771	0.171926	1.06511	0.442857	2.04293	0.0647616	2.81553	0.0131167
ML	SNV	GATK	3	94216314	94216314	C	T	MA0597.2 THAP1	-7	revcomp	atctGgggcaga	-7	revcomp	atctAgggcaga	0.00522596	0.000481188	10.8605	ENSSSCG00000056286	3:94216247-94216747	3	94216247	94216747	81.1667	24.3641	18.7267	43.7405	18.7267	37597	0.0469067	3	94254344	94257679	ENSSSCG00000056286	1.83771	0.171926	1.06511	0.442857	2.04293	0.0647616	2.81553	0.0131167
ML	SNV	GATK	3	94216314	94216314	C	T	MA0079.5 SP1	-8	revcomp	Ggggcagag	-8	revcomp	Agggcagag	0.000282288	0.00359344	0.0785563	ENSSSCG00000056286	3:94216247-94216747	3	94216247	94216747	81.1667	24.3641	18.7267	43.7405	18.7267	37597	0.0469067	3	94254344	94257679	ENSSSCG00000056286	1.83771	0.171926	1.06511	0.442857	2.04293	0.0647616	2.81553	0.0131167
ML	SNV	GATK	3	94216314	94216314	C	T	MA1638.1 HAND2	-2	direct	ccCagatgaa	-2	direct	ccTagatgaa	0.000195503	0.0039196	0.0498783	ENSSSCG00000056286	3:94216247-94216747	3	94216247	94216747	81.1667	24.3641	18.7267	43.7405	18.7267	37597	0.0469067	3	94254344	94257679	ENSSSCG00000056286	1.83771	0.171926	1.06511	0.442857	2.04293	0.0647616	2.81553	0.0131167
ML	SNV	GATK	6	75929178	75929178	C	G	MA1593.1 ZNF317	-3	direct	acaCagcacaga	-3	direct	acaGagcacaga	0.000330091	0.00401467	0.0822211	ENSSSCG00000003483	6:75929161-75929661	6	75929161	75929661	74.8333	10.2689	10.5336	41.3915	10.5336	6228	0.0449694	6	75935889	75966293	PADI4	0.0799229	0.954919	2.0035	0.196945	-1.32417	0.297804	-3.24775	0.00681666
ML	SNV	GATK	6	75929178	75929178	C	G	MA0863.1 MTF1	-8	direct	gctgcacaCagcac	-8	direct	gctgcacaGagcac	1.5635e-05	0.000216715	0.0721456	ENSSSCG00000003483	6:75929161-75929661	6	75929161	75929661	74.8333	10.2689	10.5336	41.3915	10.5336	6228	0.0449694	6	75935889	75966293	PADI4	0.0799229	0.954919	2.0035	0.196945	-1.32417	0.297804	-3.24775	0.00681666
