# Supplementary material for: Integrative multi-omics analysis of growth plate regulation underlying body size in miniature pigs
Source: Research Square preprint supplement (doi:10.21203/rs.3.rs-7865536/v1), 2025-12-01
Supplement: Supplementary file 6 [file 2f08f4adfebdee79f35ba27f.xlsx]

## Sheet: DNA
Supplementary Data 2. Summary of sequencing data used for this study.
Sequencing ID	Library type	Sequencer	Read length	Mode	Mapping rate [%]	No of reads (R1)	No of reads (R2)	Mean sequencing depth (x)	Newly sequenced	Included in ROH analysis	Bioproject	Biosample	Run accession	Breed	Sex	Body phenotype	Sample type
NGSPIG001	WGS	Hiseq 2000	150	paired	99.27	194971608	194971608	15.05	No	Yes	PRJEB27654	SAMEA4828325	ERR2744287	Mini-LEWE	f	small	NA
NGSPIG002	WGS	Hiseq 2000	150	paired	99.17	201706621	201706621	15.52	No	Yes	PRJEB27654	SAMEA4828326	ERR2744288	Mini-LEWE	f	small	NA
NGSPIG004	WGS	Nextseq500	150	paired	99.02	112579612	112579612	12.28	No	No	PRJNA635602	SAMN15046032	SRR11913877	Mangalitza	f	large	blood
NGSPIG005	WGS	Hiseq 2000	150	paired	92.42	312932451	312932451	22.1	No	No	PRJNA239399	SAMN02665304	SRR1178923, SRR1178924	Mangalitza	m	large	NA
NGSPIG006	WGS	Hiseq 2000	150	paired	98.65	206940772	206940772	15.48	No	Yes	PRJNA239399	SAMN02665305	SRR1178925	Mangalitza	m	large	NA
NGSPIG007	WGS	Hiseq 2000	150	paired	98.53	202628368	202628368	15.04	No	No	PRJNA239399	SAMN02665306	SRR1178916	Mangalitza	m	large	NA
NGSPIG010	WGS	Hiseq 2000	150	paired	96.83	221392087	221392087	15.03	No	No	PRJNA260763	SAMN03031189	SRR1581135	Yorkshire	unspecified	large	NA
NGSPIG011	WGS	Hiseq 2000	150	paired	98.65	219307768	219307768	16.47	No	No	PRJNA260763	SAMN03031138	SRR1577872	Duroc	m	large	NA
NGSPIG013	WGS	Hiseq 2000	150	paired	99.51	181697276	181697276	14.13	No	Yes	PRJEB9922	SAMEA3497824	ERR977189, ERR977190	Angeln Saddleback		large	NA
NGSPIG014	WGS	Hiseq 2500	150	paired	99.4	533736279	533736279	36.7	No	No	PRJNA309108	SAMN04440475	SRR3123434, SRR3105581, SRR3123259, SRR3105582, SRR3123278, SRR3123280	Berkshire	f	large	NA
NGSPIG015	WGS	Hiseq 2000	100	paired	99.51	212193546	212193546	16.58	No	No	PRJEB9922	SAMEA3497826	ERR977195, ERR977196	Bentheim Black Pied	unspecified	large	NA
NGSPIG016	WGS	Hiseq 2000	101	paired	99.09	212701827	212701827	16.17	No	Yes	PRJEB27654	SAMEA4828321	ERR2744283	Göttingen minipig	f	small	NA
NGSPIG017	WGS	Hiseq 2000	101	paired	99.05	184378852	184378852	14.14	No	Yes	PRJEB27654	SAMEA4828324	ERR2744286	Göttingen minipig	f	small	NA
NGSPIG023	WGS	Hiseq 2000	100	paired	99.28	258429587	258429587	20	No	Yes	PRJNA309108	SAMN04440481	SRR3123403	Meishan	f	large	NA
NGSPIG026	WGS	Hiseq 4000	101	paired	99.1	139227398	139227398	16.36	No	Yes	PRJNA438040	SAMN08689107	SRR6832872	Wuzhishan minipig	m	small	NA
NGSPIG028	WGS	Hiseq 2000	100	paired	98.8	222545045	222545045	16.69	No	Yes	PRJNA260763	SAMN03031161	SRR1581047	Yucatan miniature pig	f	small	NA
NGSPIG036	WGS	Nextseq500	100	paired	98.69	111881268	111881268	12.69	No	No	PRJNA635602	SAMN15046410	SRR11913879	Angeln SaddlebackXMangalitza	m	large	blood
NGSPIG039	WGS	Hiseq 2000	150	paired	97.49	171396954	171396954	11.8	No	Yes	PRJEB9922	SAMEA3497825	ERR977191, ERR977192, ERR977193, ERR977194	Angeln Saddleback	unspecified	large	NA
NGSPIG042	WGS	Hiseq 2000	101	paired	98.25	180114127	180114127	12.78	No	No	PRJEB9922	SAMEA3497829	ERR977201, ERR977202, ERR977203	British Saddelback	unspecified	large	NA
NGSPIG043	WGS	Hiseq 2000	101	paired	99.5	163415934	163415934	12.73	No	No	PRJEB9922	SAMEA3497830	ERR977204, ERR977205	British Saddelback	unspecified	large	NA
NGSPIG044	WGS	Hiseq 2000	150	paired	99.41	179171909	179171909	13.97	No	Yes	PRJNA322309	SAMN06115549	SRR5086719	Duroc	f	large	NA
NGSPIG045	WGS	Hiseq 2000	150	paired	99	178850710	178850710	13.86	No	Yes	PRJNA322309	SAMN06115551	SRR5086400	Duroc	f	large	NA
NGSPIG046	WGS	Hiseq 2000	150	paired	97.97	253776534	253776534	18.55	No	No	PRJEB9922	SAMEA3497841	ERR977244, ERR977245	Gloucester Old Spot	unspecified	large	NA
NGSPIG048	WGS	Hiseq 2000	150	paired	99.04	207048949	207048949	15.78	No	Yes	PRJEB27654	SAMEA4828323	ERR2744285	Göttingen minipig	f	small	NA
NGSPIG051	WGS	Hiseq 1500	150	paired	96.49	211300791	211300791	15.67	No	Yes	PRJNA320525	SAMN03421607	SRR1917381	Iberian	m	large	NA
NGSPIG052	WGS	Hiseq 2000	150	paired	95.64	179119700	179119700	13.26	No	Yes	PRJNA255085	SAMN06895012	SRR5515065	Iberian	m	large	NA
NGSPIG060	WGS	Hiseq 2000	150	paired	99.51	163528477	163528477	12.71	No	Yes	PRJNA378496	SAMN06562602	SRR5336873, SRR5336874	Meishan	f	large	NA
NGSPIG061	WGS	Hiseq 2000	150	paired	99.46	162839194	162839194	12.8	No	Yes	PRJNA378496	SAMN06563583	SRR5337895, SRR5337896	Meishan	f	large	NA
NGSPIG062	WGS	Hiseq 2000	150	paired	99.51	206888722	206888722	16.17	No	Yes	PRJEB9326	SAMEA3376939	ERR875320, ERR875321	Pietrain	unspecified	large	NA
NGSPIG063	WGS	Hiseq 2000	150	paired	99.66	179543726	179543726	13.93	No	Yes	PRJEB9326	SAMEA3376937	ERR875316, ERR875317	Pietrain	unspecified	large	NA
NGSPIG069	WGS	Hiseq 2000	150	paired	98.83	222224827	222224827	16.69	No	Yes	PRJNA260763	SAMN03031166	SRR1581052	Yucatan miniature pig	f	small	NA
NGSPIG070	WGS	Hiseq 2000	150	paired	99.08	221066840	221066840	16.89	No	Yes	PRJNA260763	SAMN03031169	SRR1581055	Yucatan miniature pig	f	small	NA
NGSPIG110	WGS	NovaSeq6000	150	paired	96.03	338845494	338845494	35.26	No	Yes	PRJNA795885	SAMN24791651	SRR17653895	Crossbreed from DL, Yorkshire, Pietrain	f	large	hair
NGSPIG111	WGS	NovaSeq6000	150	paired	97.74	284028077	284028077	31.41	No	Yes	PRJNA795885	SAMN24791884	SRR17653894	Husum Red PiedXAngeln Saddleback	f	large	hair
NGSPIG112	WGS	NovaSeq6000	150	paired	98.32	338866310	338866310	37.98	No	Yes	PRJNA795885	SAMN24792119	SRR17653893	Kune Kune	f	small	hair
NGSPIG113	WGS	NovaSeq6000	150	paired	99.19	258797975	258797975	29.6	No	Yes	PRJNA795885	SAMN24792187	SRR17653892	Angeln SaddlebackXMangalitza	f	large	muscle
NGSPIG114	WGS	NovaSeq6000	100	paired	96.09	370715400	370715400	41.08	No	No	PRJNA795885	SAMN24792221	SRR17653901	Husum Red Pied	f	large	hair
NGSPIG115	WGS	NovaSeq6000	100	paired	98.53	329816939	329816939	38.11	No	No	PRJNA795885	SAMN24792296	SRR17653900	Turopolje	f	large	hair
NGSPIG116	WGS	NovaSeq6000	100	paired	99.2	397140790	397140790	46.32	No	Yes	PRJNA795885	SAMN24792411	SRR17653899	MinipigXMangalitza	f	NA	blood
NGSPIG117	WGS	NovaSeq6000	100	paired	98.28	348257710	348257710	39.32	No	Yes	PRJNA795885	SAMN24792488	SRR17653898	Mangalitza	m	large	hair
NGSPIG118	WGS	NovaSeq6000	100	paired	94.73	356923150	356923150	39.53	No	Yes	PRJNA795885	SAMN24792530	SRR17653897	Minipig	f	small	ear
NGSPIG119	WGS	NovaSeq6000	100	paired	98.78	362349855	362349855	42.21	No	Yes	PRJNA795885	SAMN24792587	SRR17653896	Mini-LEWE	f	small	skin
NGSPIG120	WGS	NovaSeq6000	100	paired	98.54	181607917	181607917	21.05	No	Yes	PRJNA635602	SAMN15046357	SRR11913880	Minipig	m	small	hair
NGSPIG121	WGS	NovaSeq6000	101	paired	98.19	360529806	360529806	41.55	No	Yes	PRJNA635602	SAMN39959576	SRR27986430	Kune Kune	m	small	hair
NGSPIG122	WGS	NovaSeq6000	101	paired	95.94	348515282	348515282	39.72	No	Yes	PRJNA635602	SAMN39959577	SRR27986429	Minipig	f	small	ear
NGSPIG123	WGS	NovaSeq6000	100	paired	99.44	375158805	375158805	44.3	Yes	Yes	PRJNA635602	SAMN39959578	SRR27986418	Angeln Saddleback	f	large	ear
NGSPIG124	WGS	NovaSeq6000	101	paired	99.48	302744743	302744743	35.04	Yes	Yes	PRJNA635602	SAMN39959579	SRR27986414	Mangalitza	f	large	ear
NGSPIG125	WGS	NovaSeq6000	100	paired	99.37	318832880	318832880	37.29	No	Yes	PRJNA635602	SAMN39959580	SRR27986413	Kune Kune	f	small	hair
NGSPIG126	WGS	NovaSeq6000	150	paired	99.4	292431579	292431579	32.65	No	Yes	PRJNA635602	SAMN39959581	SRR27986412	Kune Kune	m	small	hair
NGSPIG127	WGS	NovaSeq6000	100	paired	99.44	380917129	380917129	45.02	No	Yes	PRJNA635602	SAMN39959582	SRR27986411	Aachen minipig	f	small	ear
NGSPIG128	WGS	NovaSeq6000	101	paired	99.14	338356906	338356906	39.9	No	Yes	PRJNA635602	SAMN39959583	SRR27986410	Aachen minipig	f	small	ear
NGSPIG129	WGS	NovaSeq6000	101	paired	99.04	345698699	345698699	40.46	No	Yes	PRJNA635602	SAMN39959584	SRR27986409	Aachen minipig	m	small	ear
NGSPIG130	WGS	NovaSeq6000	150	paired	99.26	347849627	347849627	41.13	No	Yes	PRJNA635602	SAMN39959585	SRR27986408	Aachen minipig	f	small	hair
NGSPIG131	WGS	NovaSeq6000	150	paired	99.53	417247145	417247145	49.45	No	Yes	PRJNA635602	SAMN39959586	SRR27986428	Mini-LEWE	f	small	skin
NGSPIG132	WGS	NovaSeq6000	150	paired	96.7	315338660	315338660	36.01	No	Yes	PRJNA635602	SAMN39959587	SRR27986427	Potbellied pig	f	small	hair
NGSPIG133	WGS	NovaSeq6000	101	paired	98.73	260440253	260440253	30.44	No	Yes	PRJNA635602	SAMN39959588	SRR27986426	Potbellied pig	f	small	hair
NGSPIG134	WGS	NovaSeq6000	100	paired	99.27	362857075	362857075	42.65	No	Yes	PRJNA635602	SAMN39959589	SRR27986425	Potbellied pig	f	small	hair
NGSPIG135	WGS	NovaSeq6000	100	paired	99.2	289980498	289980498	34.01	No	Yes	PRJNA635602	SAMN39959590	SRR27986424	Minipig	f	small	hair
NGSPIG136	WGS	HiSeq2000	101	paired	98.28	500261919	500261919	36.26	No	Yes	PRJNA635602	SAMN02953814	SRR448574-75, SRR448588-89	Wuzhishan minipig	m	small	blood
NGSPIG137	WGS	HiSeq2000	100	paired	99.44	206467845	206467845	24.52	No	Yes	PRJNA635602	SAMN06115550	SRR5131497	Duroc	f	large	ear
NGSPIG138	WGS	HiSeq2000	150	paired	98.78	175785975	175785975	13.37	No	Yes	PRJNA635602	SAMN05362554	SRR3745079	Iberian	m	large	muscle
NGSPIG139	WGS	HiSeqXTen	150	paired	99.25	341411359	341411359	40.36	No	Yes	PRJNA635602	SAMN09905709	SRR7791352	Large White	f	large	ear
NGSPIG140	WGS	HiSeqXTen	150	paired	99.22	281966396	281966396	33.19	No	Yes	PRJNA635602	SAMN09905720	SRR7791353	Large White	f	large	ear
NGSPIG141	WGS	HiSeqXTen	150	paired	99.2	181349133	181349133	21.45	No	Yes	PRJNA635602	SAMN10130935	SRR7903780	Large White	f	large	ear
NGSPIG142	WGS	HiScanSQ	150	paired	99.17	275562396	275562396	21.23	No	Yes	PRJNA635602	SAMN12229113	SRR9651203	Pietrain	f	large	blood
NGSPIG143	WGS	HiSeq2000	150	paired	97.8	335518129	335518129	22.82	No	Yes	PRJNA635602	SAMN03031187	SRR1581126-SRR1581128	Yorkshire	unspecified	large	blood
NGSPIG144	WGS	HiSeq4000	150	paired	99.42	451819542	451819542	34.93	No	Yes	PRJNA635602	SAMN10509972	SRR8270380	Yorkshire	f	large	blood
NGSPIG145	WGS	HiSeqXTen	150	paired	99.38	172871017	172871017	20.48	No	Yes	PRJNA635602	SAMN16550666	SRR12897626	Yorkshire	f	large	ear
NGSPIG146	WGS	NovaSeq6000	150	paired	99.05	298249738	298249738	34.05	No	No	PRJNA635602	SAMN39959591	SRR27986423	Mini-LEWE	m	small	skin
NGSPIG147	WGS	NovaSeq6000	100	paired	98.98	371193247	371193247	42.9	No	No	PRJNA635602	SAMN39959592	SRR27986422	Mini-LEWE	f	small	skin
NGSPIG148	WGS	NovaSeq6000	100	paired	97.44	253065596	253065596	28.5	No	No	PRJNA635602	SAMN39959593	SRR27986421	Husum Red Pied	f	large	hair
NGSPIG149	WGS	NovaSeq6000	100	paired	98.7	236911447	236911447	26.82	No	No	PRJNA635602	SAMN39959594	SRR27986420	Husum Red Pied	f	large	hair
NGSPIG150	WGS	NovaSeq6000	150	paired	99.19	259150617	259150617	29.37	No	No	PRJNA635602	SAMN39959595	SRR27986419	Bentheim Black Pied	f	large	hair
NGSPIG151	WGS	NovaSeq6000	100	paired	98.28	203872868	203872868	22.94	No	No	PRJNA635602	SAMN39959596	SRR27986417	Bentheim Black Pied	f	large	hair
NGSPIG152	WGS	NovaSeq6000	100	paired	98.95	414518429	414518429	47.36	No	No	PRJNA635602	SAMN39959597	SRR27986416	Turopolje	f	large	hair
NGSPIG153	WGS	NovaSeq6000	100	paired	98.95	339016065	339016065	39.28	No	No	PRJNA635602	SAMN39959598	SRR27986415	Turopolje	f	large	hair
NGSPIG154	WGS	HiSeq2000	101	paired	99.14	217773566	217773566	16.7	No	No	PRJNA260763	SAMN03031159	SRR1581045	Yucatan miniature pig	f	small	blood
NGSPIG155	WGS	HiSeq2000	100	paired	99.03	215280975	215280975	16.46	No	No	PRJNA260763	SAMN03031164	SRR1581050	Yucatan miniature pig	f	small	blood
NGSPIG156	WGS	HiSeq2000	100	paired	98.82	220790753	220790753	16.63	No	No	PRJNA260763	SAMN03031170	SRR1581056	Yucatan miniature pig	f	small	blood
NGSPIG157	WGS	HiSeq2000	150	paired	99.12	153601464	153601464	11.76	No	No	PRJNA281548	SAMN03566756	SRR2064931-SRR2064969	Berkshire	unspecified	large	NA
NGSPIG158	WGS	HiSeq2000	100	paired	98.87	173820004	173820004	12.97	No	No	PRJNA281548	SAMN03566757	SRR2070640,SRR2070642,SRR2070655,SRR2070657,SRR2070659,SRR2070668,SRR2070669,SRR2070671,SRR2070676,SRR2070677,SRR2070680,SRR2070686,SRR2070631,SRR2070632,SRR2070633,SRR2070634,SRR2070635,SRR2070636,SRR2070637,SRR2070639,SRR2070641,SRR2070645,SRR2070649,SRR2070651,SRR2070653,SRR2070654,SRR2070664,SRR2070666,SRR2070670,SRR2070672,SRR2070674,SRR2070681,SRR2070683,SRR2070685,SRR2070638,SRR2070644,SRR…	Berkshire	unspecified	large	NA
NGSPIG159	WGS	HiSeq2000	100	paired	99.39	175321145	175321145	13.77	No	No	PRJNA378496	SAMN06562573	SRR5336672,SRR5336671	Duroc	f	large	ear
NGSPIG160	WGS	HiSeqXTen	100	paired	99.7	114647484	114647484	13.62	No	No	PRJNA487172	SAMN09878801	SRR7738073	Duroc	f	large	ear
NGSPIG161	WGS	HiSeq4000	125	paired	99.5	474158230	474158230	37.09	No	No	PRJNA507853	SAMN10525956	SRR8284618	Duroc x (LandraceXYorkshire)	f	large	NA
NGSPIG162	WGS	HiSeq4000	125	paired	99.51	472539168	472539168	36.87	No	No	PRJNA507853	SAMN10536185	SRR8327267	Duroc x (LandraceXYorkshire)	f	large	NA
NGSPIG163	WGS	HiSeq4000	125	paired	99.52	495092761	495092761	38.69	No	No	PRJNA507853	SAMN10584385	SRR8362157	Duroc x (LandraceXYorkshire)	f	large	NA
NGSPIG164	WGS	HiSeq2000	100	paired	99.47	215305785	215305785	21.3	No	No	PRJNA550237	SAMN12122753	SRR9599763	French Large White	unspecified	large	ear
NGSPIG165	WGS	HiSeq2000	100	paired	99.38	205863764	205863764	20.34	No	No	PRJNA550237	SAMN12122768	SRR9599730	French Large White	unspecified	large	ear
NGSPIG166	WGS	HiSeq2000	100	paired	99.39	192941324	192941324	19.02	No	No	PRJNA550237	SAMN12122778	SRR9599748	French Large White	unspecified	large	ear
NGSPIG167	WGS	HiSeq2500	150	paired	99.48	490953533	490953533	37.87	No	No	PRJNA309108	SAMN04440474	SRR3123253,SRR3123254	Hampshire	f	large	liver
NGSPIG168	WGS	HiSeq2000	100	paired	99.6	163102194	163102194	12.4	No	No	PRJNA260763	SAMN03031157	SRR1581043	Landrace	unspecified	large	blood
NGSPIG169	WGS	HiSeq2000	100	paired	99.61	166101951	166101951	12.67	No	No	PRJNA260763	SAMN03031158	SRR1581044	Landrace	unspecified	large	blood
NGSPIG170	WGS	NovaSeq6000	100	paired	99.48	125012714	125012714	14.76	No	No	PRJNA622908	SAMN14532790	SRR11475294	Landrace	f	large	ear
NGSPIG171	WGS	HiScanSQ	100	paired	98.91	296391433	296391433	22.4	No	No	PRJNA553106	SAMN12229120	SRR9651210	LandraceXLarge White	f	large	blood
NGSPIG172	WGS	HiScanSQ	150	paired	99.05	279955916	279955916	21.24	No	No	PRJNA553106	SAMN12229125	SRR9651227	LandraceXLarge White	f	large	blood
NGSPIG173	WGS	HiScanSQ	150	paired	98.98	290274341	290274341	21.85	No	No	PRJNA553106	SAMN12229127	SRR9651229	LandraceXLarge White	f	large	blood
NGSPIG174	WGS	HiSeq4000	100	paired	99.32	453494596	453494596	34.97	No	No	PRJNA507853	SAMN10509973	SRR8270379	LandraceXYorkshire	f	large	blood
NGSPIG175	WGS	HiSeqXTen	100	paired	99.22	327242225	327242225	38.58	No	No	PRJNA487539	SAMN09905716	SRR7791347	Large White	f	large	ear
NGSPIG176	WGS	HiSeqXTen	100	paired	99.26	265965508	265965508	31.31	No	No	PRJNA487539	SAMN09905718	SRR7791355	Large White	f	large	ear
NGSPIG177	WGS	HiScanSQ	140	paired	98.99	291655131	291655131	22.09	No	No	PRJNA553106	SAMN12229123	SRR9651225	Large White	f	large	blood
NGSPIG178	WGS	HiSeq2000	100	paired	99.45	155640030	155640030	12.09	No	No	PRJNA378496	SAMN06562584	SRR5336864,SRR5336865	Meishan	f	large	ear
NGSPIG179	WGS	HiSeq2000	100	paired	99.44	156397126	156397126	12.29	No	No	PRJNA378496	SAMN06563284	SRR5337760,SRR5337761	Meishan	f	large	ear
NGSPIG180	WGS	HiSeq2000	100	paired	99.45	160939408	160939408	12.64	No	No	PRJNA378496	SAMN06610393	SRR5351706,SRR5351707	Meishan	f	large	ear
NGSPIG181	WGS	HiScanSQ	100	paired	99.15	326174476	326174476	24.93	No	No	PRJNA553106	SAMN12229111	SRR9651205	Pietrain	f	large	blood
NGSPIG182	WGS	HiScanSQ	100	paired	99.06	315600391	315600391	24.05	No	No	PRJNA553106	SAMN12229122	SRR9651222	Pietrain	f	large	blood
NGSPIG183	WGS	HiScanSQ	100	paired	99.17	292874831	292874831	22.59	No	No	PRJNA553106	SAMN12229134	SRR9651219	Pietrain	f	large	blood
NGSPIG184	WGS	HiSeq2000	100	paired	99.48	155378167	155378167	12.1	No	No	PRJNA378496	SAMN06563285	SRR5337762,SRR5337763	Yorkshire	f	large	ear
NGSPIG185	WGS	HiSeq1000	101	paired	93.42	194086820	194086820	14.14	No	No	PRJNA320525	SAMN03396581	SRR1873281,SRR1873282	Tamworth	m	large	muscle
NGSPIG186	WGS	HiSeq2000	101	paired	97.53	209333064	209333064	14.62	No	No	PRJNA260763	SAMN03031184	SRR1581116-SRR1581118	Yorkshire	unspecified	large	blood

## Sheet: Hi-C
Sequencing ID	LabID	Library type	Sequencer	Mode	Read length	No of reads (R1)	No of reads (R2)	Bioproject	Biosample	Run accession	Sample type	Animal ID	Breed	Sex	Tissue type	Sample location
HICPIG010	MPGPIG0267	Hi-C	NextSeq 2000	paired	150bp	550440108	550440108	PRJNA1274638	SAMN48997306	SRR33928153		ML4	Mini-LEWE	m	Mesenchymal stem cells	Hip

## Sheet: ATAC-seq
Sequencing ID	Sample ID	Library type	Sequencer	Mode	Read length	No of reads (R1)	No of reads (R2)	Animal ID	Breed	Sex	Sample type	Sample location	Bioproject	Biosample	SRA	Run accession
ATACPIG001	MPGPIG0112	ATAC	NovaSeq 6000	paired	100bp	119031223	119031223	ML1	Mini-LEWE	m	Growth plate	Humerus left side	PRJNA1274638	SAMN48996865		SRR33927959
ATACPIG002	MPGPIG0129	ATAC	NovaSeq 6000	paired	100bp	97534418	97534418	ML1	Mini-LEWE	m	Growth plate	Femur left side	PRJNA1274638	SAMN48996866		SRR33927958
ATACPIG003	MPGPIG0154	ATAC	NovaSeq 6000	paired	100bp	127617004	127617004	ML2	Mini-LEWE	f	Growth plate	Humerus left side	PRJNA1274638	SAMN48996867		SRR33927947
ATACPIG004	MPGPIG0171	ATAC	NovaSeq 6000	paired	100bp	148004325	148004325	ML2	Mini-LEWE	f	Growth plate	Femur left side	PRJNA1274638	SAMN48996868		SRR33927942
ATACPIG005	MPGPIG0196	ATAC	NovaSeq 6000	paired	100bp	132265482	132265482	ML3	Mini-LEWE	m	Growth plate	Humerus left side	PRJNA1274638	SAMN48996869		SRR33927941
ATACPIG006	MPGPIG0213	ATAC	NovaSeq 6000	paired	100bp	125283240	125283240	ML3	Mini-LEWE	m	Growth plate	Femur left side	PRJNA1274638	SAMN48996870		SRR33927940
ATACPIG007	MPGPIG0292	ATAC	NovaSeq 6000	paired	100bp	121142236	121142236	AS1	Angeln Saddleback	m	Growth plate	Humerus left side	PRJNA1274638	SAMN48996871		SRR33927939
ATACPIG008	MPGPIG0310	ATAC	NovaSeq 6000	paired	100bp	141588691	141588691	AS1	Angeln Saddleback	m	Growth plate	Femur left side	PRJNA1274638	SAMN48996872		SRR33927938
ATACPIG009	MPGPIG0342	ATAC	NovaSeq 6000	paired	100bp	146003191	146003191	AS2	Angeln Saddleback	m	Growth plate	Humerus left side	PRJNA1274638	SAMN48996873		SRR33927937
ATACPIG010	MPGPIG0360	ATAC	NovaSeq 6000	paired	100bp	132535362	132535362	AS2	Angeln Saddleback	m	Growth plate	Femur left side	PRJNA1274638	SAMN48996874		SRR33927936
ATACPIG011	MPGPIG0392	ATAC	NovaSeq 6000	paired	100bp	146425167	146425167	AS3	Angeln Saddleback	f	Growth plate	Humerus left side	PRJNA1274638	SAMN48996875		SRR33927957
ATACPIG012	MPGPIG0410	ATAC	NovaSeq 6000	paired	100bp	136073787	136073787	AS3	Angeln Saddleback	f	Growth plate	Femur left side	PRJNA1274638	SAMN48996876		SRR33927956
ATACPIG013	MPGPIG0620	ATAC	NovaSeq 6000	paired	100bp	184999768	184999768	MA1	Mangalitza	f	Growth plate	Humerus left side	PRJNA1274638	SAMN48996877		SRR33927955
ATACPIG014	MPGPIG0639	ATAC	NovaSeq 6000	paired	100bp	116398894	116398894	MA1	Mangalitza	f	Growth plate	Femur left side	PRJNA1274638	SAMN48996878		SRR33927954
ATACPIG015	MPGPIG0696	ATAC	NovaSeq 6000	paired	100bp	127189175	127189175	MA2	Mangalitza	m	Growth plate	Humerus left side	PRJNA1274638	SAMN48996879		SRR33927953
ATACPIG016	MPGPIG0715	ATAC	NovaSeq 6000	paired	100bp	127166298	127166298	MA2	Mangalitza	m	Growth plate	Femur left side	PRJNA1274638	SAMN48996880		SRR33927952
ATACPIG017	MPGPIG0772	ATAC	NovaSeq 6000	paired	100bp	163823732	163823732	MA3	Mangalitza	m	Growth plate	Humerus left side	PRJNA1274638	SAMN48996881		SRR33927951
ATACPIG018	MPGPIG0791	ATAC	NovaSeq 6000	paired	100bp	177604294	177604294	MA3	Mangalitza	m	Growth plate	Femur left side	PRJNA1274638	SAMN48996882		SRR33927950
ATACPIG019	MPGPIG1002	ATAC	NovaSeq 6000	paired	100bp	120532763	120532763	AM2	Aachen Minipig	f	Growth plate	Humerus left side	PRJNA1274638	SAMN48996883		SRR33927949
ATACPIG020	MPGPIG1016	ATAC	NovaSeq 6000	paired	100bp	125604194	125604194	AM2	Aachen Minipig	f	Growth plate	Femur left side	PRJNA1274638	SAMN48996884		SRR33927948
ATACPIG021	MPGPIG1071	ATAC	NovaSeq 6000	paired	100bp	127343605	127343605	AM3	Aachen Minipig	m	Growth plate	Humerus left side	PRJNA1274638	SAMN48996885		SRR33927946
ATACPIG022	MPGPIG1085	ATAC	NovaSeq 6000	paired	100bp	162166140	162166140	AM3	Aachen Minipig	m	Growth plate	Femur left side	PRJNA1274638	SAMN48996886		SRR33927945
ATACPIG023	MPGPIG1141	ATAC	NovaSeq 6000	paired	100bp	168483207	168483207	AM4	Aachen Minipig	m	Growth plate	Humerus left side	PRJNA1274638	SAMN48996887		SRR33927944
ATACPIG024	MPGPIG1155	ATAC	NovaSeq 6000	paired	100bp	80130618	80130618	AM4	Aachen Minipig	m	Growth plate	Femur left side	PRJNA1274638	SAMN48996888		SRR33927943

## Sheet: RNA-seq
Sequencing ID	Sample ID	Library type	Sequencer	Read length	Mode	No of reads (R1)	No of reads (R2)	Animal ID	Breed	Sex	Sample type	Sample location	Bioproject	Biosample	SRA	Run accession
RNAPIG048	MPGPIG0188	polyA-tailed RNA library	NovaSeq 6000	100bp	paired	39629492	39629492	ML3	Mini-LEWE	m	Growth plate	Humerus left side	PRJNA1200293	SAMN45903444		SRR31775432
RNAPIG049	MPGPIG0205	polyA-tailed RNA library	NovaSeq 6000	100bp	paired	36030456	36030456	ML3	Mini-LEWE	m	Growth plate	Femur left side	PRJNA1200293	SAMN45903445		SRR31775431
RNAPIG050	MPGPIG0383	polyA-tailed RNA library	NovaSeq 6000	100bp	paired	40323616	40323616	AS3	Angeln Saddleback	f	Growth plate	Humerus left side	PRJNA1200293	SAMN45903446		SRR31775420
RNAPIG051	MPGPIG0402	polyA-tailed RNA library	NovaSeq 6000	100bp	paired	46864113	46864113	AS3	Angeln Saddleback	f	Growth plate	Femur left side	PRJNA1200293	SAMN45903447		SRR31775416
RNAPIG052	MPGPIG0687	polyA-tailed RNA library	NovaSeq 6000	100bp	paired	42473747	42473747	MA2	Mangalitza	m	Growth plate	Humerus left side	PRJNA1200293	SAMN45903448		SRR31775415
RNAPIG053	MPGPIG0706	polyA-tailed RNA library	NovaSeq 6000	100bp	paired	33806274	33806274	MA2	Mangalitza	m	Growth plate	Femur left side	PRJNA1200293	SAMN45903449		SRR31775414
RNAPIG054	MPGPIG1065	polyA-tailed RNA library	NovaSeq 6000	100bp	paired	43781168	43781168	AM3	Aachen Minipig	f	Growth plate	Humerus left side	PRJNA1200293	SAMN45903450		SRR31775413
RNAPIG055	MPGPIG1077	polyA-tailed RNA library	NovaSeq 6000	100bp	paired	35674649	35674649	AM3	Aachen Minipig	f	Growth plate	Femur left side	PRJNA1200293	SAMN45903451		SRR31775412
RNAPIG056	MPGPIG0230	polyA-tailed RNA library	NovaSeq 6000	100bp	paired	42703741	42703741	ML4	Mini-LEWE	f	Growth plate	Humerus left side	PRJNA1200293	SAMN45903452		SRR31775411
RNAPIG057	MPGPIG0247	polyA-tailed RNA library	NovaSeq 6000	100bp	paired	35045437	35045437	ML4	Mini-LEWE	f	Growth plate	Femur left side	PRJNA1200293	SAMN45903453		SRR31775410
RNAPIG058	MPGPIG0333	polyA-tailed RNA library	NovaSeq 6000	100bp	paired	38313653	38313653	AS2	Angeln Saddleback	m	Growth plate	Humerus left side	PRJNA1200293	SAMN45903454		SRR31775430
RNAPIG059	MPGPIG0351	polyA-tailed RNA library	NovaSeq 6000	100bp	paired	38669212	38669212	AS2	Angeln Saddleback	m	Growth plate	Femur left side	PRJNA1200293	SAMN45903455		SRR31775429
RNAPIG060	MPGPIG0763	polyA-tailed RNA library	NovaSeq 6000	100bp	paired	35459570	35459570	MA3	Mangalitza	m	Growth plate	Humerus left side	PRJNA1200293	SAMN45903456		SRR31775428
RNAPIG061	MPGPIG0782	polyA-tailed RNA library	NovaSeq 6000	100bp	paired	44937530	44937530	MA3	Mangalitza	m	Growth plate	Femur left side	PRJNA1200293	SAMN45903457		SRR31775427
RNAPIG062	MPGPIG0996	polyA-tailed RNA library	NovaSeq 6000	100bp	paired	37805839	37805839	AM2	Aachen Minipig	f	Growth plate	Humerus left side	PRJNA1200293	SAMN45903458		SRR31775426
RNAPIG063	MPGPIG1008	polyA-tailed RNA library	NovaSeq 6000	100bp	paired	46531127	46531127	AM2	Aachen Minipig	f	Growth plate	Femur left side	PRJNA1200293	SAMN45903459		SRR31775425
RNAPIG064	MPGPIG0121	polyA-tailed RNA library	NovaSeq 6000	100bp	paired	40316125	40316125	ML1	Mini-LEWE	m	Growth plate	Femur left side	PRJNA1200293	SAMN45903460		SRR31775424
RNAPIG065	MPGPIG0104	polyA-tailed RNA library	NovaSeq 6000	100bp	paired	46658622	46658622	ML1	Mini-LEWE	m	Growth plate	Humerus left side	PRJNA1200293	SAMN45903461		SRR31775423
RNAPIG066	MPGPIG0434	polyA-tailed RNA library	NovaSeq 6000	100bp	paired	31966363	31966363	AS4	Angeln Saddleback	m	Growth plate	Humerus left side	PRJNA1200293	SAMN45903462		SRR31775422
RNAPIG067	MPGPIG0452	polyA-tailed RNA library	NovaSeq 6000	100bp	paired	42541897	42541897	AS4	Angeln Saddleback	m	Growth plate	Femur left side	PRJNA1200293	SAMN45903463		SRR31775421
RNAPIG068	MPGPIG0611	polyA-tailed RNA library	NovaSeq 6000	100bp	paired	31375662	31375662	MA1	Mangalitza	f	Growth plate	Humerus left side	PRJNA1200293	SAMN45903464		SRR31775419
RNAPIG069	MPGPIG0927	polyA-tailed RNA library	NovaSeq 6000	100bp	paired	37016228	37016228	AM1	Aachen Minipig	f	Growth plate	Humerus left side	PRJNA1200293	SAMN45903465		SRR31775418
RNAPIG070	MPGPIG0939	polyA-tailed RNA library	NovaSeq 6000	100bp	paired	56220021	56220021	AM1	Aachen Minipig	f	Growth plate	Femur left side	PRJNA1200293	SAMN45903466		SRR31775417

## Sheet: Proteomics
Sequencing ID	Animal ID	Breed	Sex	Sample type	Sample location
MPGPIG0111	ML1	Mini-Lewe	m	Growth plate	Humerus left side
MPGPIG0153	ML2	Mini-Lewe	f	Growth plate	Humerus left side
MPGPIG0195	ML3	Mini-Lewe	m	Growth plate	Humerus left side
MPGPIG0933	AM1	Aachen Minipig	f	Growth plate	Humerus left side
MPGPIG1002	AM2	Aachen Minipig	f	Growth plate	Humerus left side
MPGPIG1071	AM3	Aachen Minipig	m	Growth plate	Humerus left side
MPGPIG0620	MA2	Mangalitza	m	Growth plate	Humerus left side
MPGPIG0772	MA3	Mangalitza	m	Growth plate	Humerus left side
MPGPIG0848	MA4	Mangalitza	m	Growth plate	Humerus left side
MPGPIG0291	AS1	Angeln Saddleback	m	Growth plate	Humerus left side
MPGPIG0341	AS2	Angeln Saddleback	m	Growth plate	Humerus left side
MPGPIG0391	AS3	Angeln Saddleback	f	Growth plate	Humerus left side
