# Supplementary material for: Integrative multi-omics analysis of growth plate regulation underlying body size in miniature pigs
Source: Research Square preprint supplement (doi:10.21203/rs.3.rs-7865536/v1), 2025-12-01
Supplement: Supplementary file 7 [file 6f870f3daf27ece49bd534f2.xlsx]

## Sheet: hits_fst_windows_weighted_fst_g
Supplementary Data 6. Overview of the identified FST windows above the 0.2% distribution threshold (Manhattan plot) corresponding to weighted Fst ≥ 0.53. Additionally, the chromosome, the start and end of the binned window as well as information of the genes within this windows are shown.
Chromosome	Bin start	Bin end	Weighted Fst	Mean Fst	Gene ID	Gene name	Gene start	Gene end
1	113840001	113890000	0.556453	0.487318	ENSSSCG00000004597	AQP9	113794040	113848683
1	115700001	115750000	0.563111	0.504299	ENSSSCG00000004603	RFX7	115734347	115871084
1	113910001	113960000	0.560207	0.509478	ENSSSCG00000025578	ALDH1A2	113932739	114037046
1	113840001	113890000	0.556453	0.487318	ENSSSCG00000046774		113867091	113869587
1	115700001	115750000	0.563111	0.504299	ENSSSCG00000057596		115700919	115733995
3	38030001	38080000	0.552953	0.471822	ENSSSCG00000007949	SRL	38073562	38111932
3	38720001	38770000	0.571459	0.52331	ENSSSCG00000007955	CLUAP1	38716431	38753748
3	38710001	38760000	0.566262	0.494355	ENSSSCG00000007956	NLRC3	38687967	38710938
3	38720001	38770000	0.571459	0.52331	ENSSSCG00000007957	C16ORF90	38759975	38762463
3	41450001	41500000	0.551233	0.463613	ENSSSCG00000007975	HBZ	41490328	41492120
3	41450001	41500000	0.551233	0.463613	ENSSSCG00000007977	HBM	41489313	41490264
3	41450001	41500000	0.551233	0.463613	ENSSSCG00000007978		41482363	41487535
3	41450001	41500000	0.551233	0.463613	ENSSSCG00000007979	LUC7L	41449002	41470977
3	41430001	41480000	0.574827	0.501064	ENSSSCG00000007980	FAM234A	41410818	41437203
3	41510001	41560000	0.551464	0.484209	ENSSSCG00000007981	NPRL3	41479193	41540717
3	41510001	41560000	0.551464	0.484209	ENSSSCG00000007982		41540656	41548290
3	41390001	41440000	0.560438	0.494837	ENSSSCG00000007983	PDIA2	41394058	41397687
3	41300001	41350000	0.552119	0.478906	ENSSSCG00000007984	MRPL28	41329928	41334451
3	41300001	41350000	0.552119	0.478906	ENSSSCG00000007985	PGAP6	41318889	41330273
3	41300001	41350000	0.552119	0.478906	ENSSSCG00000007986	NME4	41306175	41310312
3	41300001	41350000	0.552119	0.478906	ENSSSCG00000007987	DECR2	41295648	41304032
3	41090001	41140000	0.562834	0.501569	ENSSSCG00000007988	JMJD8	41090788	41093614
3	41120001	41170000	0.555773	0.4881	ENSSSCG00000007991	WDR90	41106720	41122426
3	41120001	41170000	0.555773	0.4881	ENSSSCG00000007992	PIGQ	41160657	41176318
3	41200001	41250000	0.566723	0.499045	ENSSSCG00000007993	CAPN15	41190830	41208653
3	41120001	41170000	0.555773	0.4881	ENSSSCG00000007995	MCRIP2	41123048	41127917
3	41090001	41140000	0.562834	0.501569	ENSSSCG00000007998	RHBDL1	41096884	41099587
3	41010001	41060000	0.569064	0.495909	ENSSSCG00000008000	RPUSD1	41009717	41013018
3	41020001	41070000	0.570539	0.506525	ENSSSCG00000008001		41025895	41029238
3	41050001	41100000	0.553446	0.506351	ENSSSCG00000008002	CIAO3	41042702	41050012
3	41050001	41100000	0.553446	0.506351	ENSSSCG00000008003	HAGHL	41046171	41053464
3	41060001	41110000	0.555215	0.508455	ENSSSCG00000008004	ANTKMT	41057649	41062032
3	41080001	41130000	0.56	0.501929	ENSSSCG00000008006	FBXL16	41071823	41083644
3	41090001	41140000	0.562834	0.501569	ENSSSCG00000008007	WDR24	41085463	41090610
3	41090001	41140000	0.562834	0.501569	ENSSSCG00000008008	STUB1	41092449	41095136
3	40930001	40980000	0.569311	0.515263	ENSSSCG00000008009	LMF1	40835413	40934253
3	41000001	41050000	0.570471	0.511203	ENSSSCG00000008010	CHTF18	41000690	41009589
3	41000001	41050000	0.570471	0.511203	ENSSSCG00000008011	GNG13	40998504	41000905
3	39650001	39700000	0.553681	0.49241	ENSSSCG00000008051	ABCA3	39698895	39732978
3	39650001	39700000	0.553681	0.49241	ENSSSCG00000008052		39666440	39667494
3	39480001	39530000	0.553928	0.525212	ENSSSCG00000008057	AMDHD2	39522163	39532995
3	41900001	41950000	0.551565	0.456032	ENSSSCG00000008066	ZNF484	41893285	41918685
3	41990001	42040000	0.552594	0.48976	ENSSSCG00000008068	IARS1	41945770	42022760
3	41990001	42040000	0.552594	0.48976	ENSSSCG00000008069	NOL8	42026278	42052773
3	42300001	42350000	0.593928	0.547313	ENSSSCG00000008070	CENPP	42053058	42308429
3	43770001	43820000	0.644822	0.600629	ENSSSCG00000008089	CKAP2L	43736744	43772974
3	43730001	43780000	0.663174	0.614246	ENSSSCG00000008090	IL1A	43718368	43731119
3	43780001	43830000	0.638191	0.583255	ENSSSCG00000008092	NT5DC4	43779259	43789121
3	39130001	39180000	0.553009	0.536848	ENSSSCG00000020895	BICDL2	39153552	39161442
3	38720001	38770000	0.571459	0.52331	ENSSSCG00000021065	NAA60	38763447	38781988
3	39130001	39180000	0.553009	0.536848	ENSSSCG00000021536	CLDN9	39172853	39174354
3	39130001	39180000	0.553009	0.536848	ENSSSCG00000021569	MMP25	39130777	39142303
3	41390001	41440000	0.560438	0.494837	ENSSSCG00000023204	AXIN1	41337071	41393997
3	39130001	39180000	0.553009	0.536848	ENSSSCG00000023315	THOC6	39161434	39164707
3	41020001	41070000	0.570539	0.506525	ENSSSCG00000023487	MSLNL	41016457	41025590
3	38000001	38050000	0.551846	0.468781	ENSSSCG00000023653	GLIS2	37998078	38009024
3	39130001	39180000	0.553009	0.536848	ENSSSCG00000023743	CLDN6	39167853	39172628
3	40070001	40120000	0.552364	0.487729	ENSSSCG00000025711		40092732	40133171
3	39130001	39180000	0.553009	0.536848	ENSSSCG00000027130	TNFRSF12A	39166298	39168302
3	42410001	42460000	0.564267	0.498086	ENSSSCG00000027166	BICD2	42393277	42456782
3	39130001	39180000	0.553009	0.536848	ENSSSCG00000027252	HCFC1R1	39164375	39166049
3	42510001	42560000	0.558899	0.449885	ENSSSCG00000028185	FGD3	42540550	42596528
3	42240001	42290000	0.560585	0.488671	ENSSSCG00000028549	ECM2	42203171	42243547
3	42360001	42410000	0.570282	0.522724	ENSSSCG00000030204	IPPK	42308005	42368118
3	39640001	39690000	0.559009	0.505883	ENSSSCG00000031982		39648130	39648552
3	41120001	41170000	0.555773	0.4881	ENSSSCG00000032188	METTL26	41134246	41141353
3	43810001	43860000	0.593433	0.510458	ENSSSCG00000032288	SLC20A1	43844722	43860547
3	41090001	41140000	0.562834	0.501569	ENSSSCG00000032501		41095244	41096700
3	41120001	41170000	0.555773	0.4881	ENSSSCG00000033792	RAB40C	41140561	41160077
3	41990001	42040000	0.552594	0.48976	ENSSSCG00000034789		42018978	42019109
3	41240001	41290000	0.562023	0.457791	ENSSSCG00000035854	RAB11FIP3	41211684	41285502
3	41410001	41460000	0.568349	0.498116	ENSSSCG00000036541	RGS11	41402316	41410868
3	41120001	41170000	0.555773	0.4881	ENSSSCG00000037013	WFIKKN1	41136202	41138785
3	39480001	39530000	0.553928	0.525212	ENSSSCG00000037719	PDPK1	39432058	39512601
3	41450001	41500000	0.551233	0.463613	ENSSSCG00000038804	HBQ1	41478270	41480119
3	41400001	41450000	0.561784	0.484292	ENSSSCG00000038979	ARHGDIG	41397643	41400241
3	38030001	38080000	0.552953	0.471822	ENSSSCG00000040215	TFAP4	38050308	38060817
3	40980001	41030000	0.570752	0.50718	ENSSSCG00000041715		40945963	40984105
3	41240001	41290000	0.562023	0.457791	ENSSSCG00000044588		41287994	41293934
3	41050001	41100000	0.553446	0.506351	ENSSSCG00000050615	CCDC78	41053936	41057734
3	42380001	42430000	0.555295	0.477533	ENSSSCG00000052853		42386739	42389528
3	41440001	41490000	0.556672	0.477256	ENSSSCG00000054274		41441604	41444847
3	41890001	41940000	0.556083	0.459275	ENSSSCG00000057504		41888200	41892150
3	41060001	41110000	0.555215	0.508455	ENSSSCG00000058140	METRN	41061225	41064391
3	39640001	39690000	0.559009	0.505883	ENSSSCG00000058902		39648759	39648998
3	39620001	39670000	0.554156	0.497851	ENSSSCG00000060192		39621853	39626200
3	40950001	41000000	0.569162	0.502282	ENSSSCG00000062344	U6	40950619	40950725
3	40990001	41040000	0.56717	0.497466	ENSSSCG00000062885		40992569	40995629
3	41100001	41150000	0.556871	0.484979	ENSSSCG00000062928	RHOT2	41100879	41106418
4	75530001	75580000	0.714488	0.627185	ENSSSCG00000006243	PENK	75525555	75530876
4	75590001	75640000	0.671691	0.598924	ENSSSCG00000006245	SDR16C5	75586525	75598989
4	75690001	75740000	0.632975	0.509475	ENSSSCG00000006247	PLAG1	75646584	75694117
4	75740001	75790000	0.584416	0.44106	ENSSSCG00000006248	MOS	75739402	75741076
4	75800001	75850000	0.567209	0.437252	ENSSSCG00000006250	LYN	75793492	75903496
4	75960001	76010000	0.561305	0.454108	ENSSSCG00000006251	TGS1	75937129	75969157
4	75980001	76030000	0.552321	0.489946	ENSSSCG00000006252	TMEM68	75969247	76001178
4	106770001	106820000	0.551394	0.489498	ENSSSCG00000006766	PHTF1	106809391	106876846
4	75760001	75810000	0.595476	0.452249	ENSSSCG00000018353	SNORD54	75762686	75762750
4	106770001	106820000	0.551394	0.489498	ENSSSCG00000030154	RSBN1	106758836	106806863
4	75640001	75690000	0.738753	0.676659	ENSSSCG00000032573		75636278	75646153
4	75570001	75620000	0.677371	0.574188	ENSSSCG00000036133		75548205	75579557
4	75760001	75810000	0.595476	0.452249	ENSSSCG00000040470	RPS20	75762209	75769955
4	82530001	82580000	0.552684	0.453922	ENSSSCG00000044238		82536899	82539527
4	75760001	75810000	0.595476	0.452249	ENSSSCG00000048200		75750579	75761382
4	75980001	76030000	0.552321	0.489946	ENSSSCG00000054199		76015879	76020748
8	128480001	128530000	0.552076	0.422196	ENSSSCG00000022986	CCSER1	127730902	128953332
9	30620001	30670000	0.55637	0.463987	ENSSSCG00000014975	CNTN5	30572372	31469858
9	48440001	48490000	0.583696	0.491997	ENSSSCG00000015135	SORL1	48435345	48653655
9	113700001	113750000	0.564461	0.469978	ENSSSCG00000015473	TMEM183A	113713032	113725847
9	113700001	113750000	0.564461	0.469978	ENSSSCG00000015474	PPFIA4	113727855	113777766
9	92480001	92530000	0.554797	0.495462	ENSSSCG00000020870		92448738	92481379
9	92600001	92650000	0.551117	0.399171	ENSSSCG00000024485	RUNDC3B	92528662	92823561
9	92490001	92540000	0.55745	0.496263	ENSSSCG00000026177	SLC25A40	92481564	92528186
9	48420001	48470000	0.570685	0.458592	ENSSSCG00000045095		48386052	48428056
9	48420001	48470000	0.570685	0.458592	ENSSSCG00000057178		48419551	48427704
9	113670001	113720000	0.566325	0.473295	ENSSSCG00000058655		113670694	113670924
9	92440001	92490000	0.55717	0.4923	ENSSSCG00000059544		92445194	92447352
13	35010001	35060000	0.575538	0.513909	ENSSSCG00000011454	SFMBT1	35025769	35180042
13	37830001	37880000	0.572633	0.49988	ENSSSCG00000024417	ERC2	37388517	38367504
13	35010001	35060000	0.575538	0.513909	ENSSSCG00000033422	STIMATE	34949577	35017827
14	117850001	117900000	0.553961	0.450519	ENSSSCG00000030026	SORCS1	117479787	118009583
15	39090001	39140000	0.56108	0.444569	ENSSSCG00000015770	VEGFC	39039311	39132936
15	87120001	87170000	0.559339	0.52805	ENSSSCG00000016010	CERKL	87029306	87159566
15	104090001	104140000	0.597236	0.550015	ENSSSCG00000016091		104071268	104099188
15	104110001	104160000	0.580467	0.541285	ENSSSCG00000016092	SGO2	104099384	104150720
15	104440001	104490000	0.592309	0.541212	ENSSSCG00000016093		104396481	104499737
15	104780001	104830000	0.561891	0.467371	ENSSSCG00000016101	CFLAR	104781616	104835630
15	87590001	87640000	0.598562	0.566997	ENSSSCG00000023924	PDE1A	87619067	87966491
15	104110001	104160000	0.580467	0.541285	ENSSSCG00000029606	AOX1	104157527	104236006
15	104290001	104340000	0.609247	0.563973	ENSSSCG00000040051		104329725	104393731
15	39090001	39140000	0.56108	0.444569	ENSSSCG00000044843		39139386	39143341
15	104270001	104320000	0.640997	0.619204	ENSSSCG00000052019		104275217	104278234
15	104770001	104820000	0.572205	0.497972	ENSSSCG00000053415		104777911	104779770
15	87590001	87640000	0.598562	0.566997	ENSSSCG00000056781	PPP1R1C	87466718	87604041
15	104250001	104300000	0.585094	0.510664	ENSSSCG00000063251		104249831	104255013
