# Supplementary material for: Integrative multi-omics analysis of growth plate regulation underlying body size in miniature pigs
Source: Research Square preprint supplement (doi:10.21203/rs.3.rs-7865536/v1), 2025-12-01
Supplement: Supplementary file 8 [file a7667048e4099680939b8ca2.xlsx]

## Sheet: Sheet1
Supplementary Data 8. Differentially Exon Usage (DEU) in all four breeds of pig. It displays the significant exon usage list (p-value < 0.05) of annotated Ensembl ID and exon ID followed by base mean and dispersion of samples, normalized countsin each breed as well as the log2FC. Additionally the genomic data, gene name and type as well as the raw counts are shown.
Gene Info					Differential Exon Usage Statistics														Exon info
Ensembl ID	Gene name	Chromosome	Gene start	Gene end	Exon ID	exonBaseMean	dispersion	stat	pvalue	padj	AM	AS	MA	ML	log2fold_AM_AS	log2fold_ML_AS	log2fold_AM_MA	log2fold_ML_MA	genomicData.seqnames	genomicData.start	genomicData.end	genomicData.width	genomicData.strand
ENSSSCG00000000003	TTC38	5	3248346	3270778	E013	57.3212	0.00970326	11.7925	0.0081288	0.908484	10.7349	9.5814	11.1639	11.2047	0.33693	0.464427	-0.116625	0.0108726	5	3265437	3265608	172	-
ENSSSCG00000000010	FBLN1	5	3839502	3927183	E009	424.092	0.00336864	10.0308	0.0183064	1	26.269	27.8544	26.8189	26.9531	-0.200728	-0.113107	-0.0705522	0.0170686	5	3887618	3887746	129	-
ENSSSCG00000000010	FBLN1	5	3839502	3927183	E004	293.891	0.013055	9.61618	0.022127	1	21.7	23.5482	22.7687	23.7649	-0.267006	0.0302498	-0.156435	0.140821	5	3874426	3874892	467	-
ENSSSCG00000000019	NUP50	5	4197544	4219230	E008	12.8818	0.0957657	8.63783	0.0345146	1	5.31806	6.09103	4.64092	3.59869	-0.394943	-1.52766	0.395555	-0.737158	5	4214723	4214806	84	-
ENSSSCG00000000020	PHF21B	5	4291396	4386247	E013	4.07099	0.153	7.88306	0.0484913	1	2.17481	3.49979	2.1782	3.53519	-1.37564	0.0291309	-0.00450226	1.40027	5	4383523	4383626	104	+
ENSSSCG00000000024	PARVB	5	4906685	5015441	E002	451.745	0.00245814	14.4536	0.00234846	0.728958	28.6838	28.1541	27.6578	26.6834	0.0648343	-0.184516	0.126347	-0.123003	5	4907625	4909725	2101	-
ENSSSCG00000000024	PARVB	5	4906685	5015441	E012	535.223	0.00234533	8.23309	0.0414323	1	29.8134	28.979	29.7522	30.3213	0.099879	0.159783	0.00725896	0.0671626	5	4943920	4944022	103	-
ENSSSCG00000000029	SCUBE1	5	5561505	5692328	E019	58.4351	0.0106805	7.86652	0.0488525	1	11.4497	11.396	10.055	10.4862	0.0140321	-0.247648	0.386203	0.124523	5	5681663	5681824	162	+
ENSSSCG00000000034	TTLL12	5	5701583	5720724	E016	517.825	0.00293226	9.28412	0.0257424	1	28.7208	29.1878	29.04	30.4634	-0.0564607	0.151254	-0.0386508	0.169064	5	5717052	5717190	139	+
ENSSSCG00000000036	PACSIN2	5	5853377	5985169	E009	4.5918	0.11674	18.6149	0.000328382	0.493219	2.98807	4.36869	1.99598	1.99772	-1.09986	-2.26346	1.16612	0.00251828	5	5963918	5964133	216	+
ENSSSCG00000000037	ARFGAP3	5	5994174	6055091	E024	4.3666	0.431833	12.9043	0.00484816	0.825801	1.92092	4.92283	2.56829	1.49901	-2.72324	-3.43935	-0.839135	-1.55525	5	6050900	6055091	4192	+
ENSSSCG00000000038	CYB5R3	5	6146276	6170202	E010	1984.78	0.0023644	8.1158	0.0436782	1	47.4362	48.6871	47.7758	48.7473	-0.116324	0.00556737	-0.0316854	0.0902057	5	6169090	6170212	1123	+
ENSSSCG00000000045	NDUFA6	5	6562011	6567647	E005	691.869	0.00187875	10.7501	0.0131569	0.968437	33.3915	33.4245	32.2524	32.6749	-0.00364647	-0.0833886	0.127251	0.047509	5	6566714	6567647	934	+
ENSSSCG00000000046	CYP2D6	5	6538907	6543642	E010	9.41307	0.220969	10.2875	0.0162741	0.987685	4.30101	3.20079	5.75584	4.52213	0.85565	1.00105	-0.84629	-0.700891	5	6543392	6543640	249	+
ENSSSCG00000000059	XRCC6	5	6903495	6929052	E020	2.73061	0.234335	10.5164	0.0146501	0.9769	1.69319	2.79997	1.17087	3.01985	-1.45325	0.218618	1.06489	2.73675	5	6928635	6928712	78	-
ENSSSCG00000000064	ACO2	5	7008719	7071025	E017	592.339	0.000894391	9.0378	0.0287925	1	31.4138	30.7849	30.5144	31.5445	0.0726067	0.0875852	0.104126	0.119104	5	7023693	7023797	105	-
ENSSSCG00000000066	L3MBTL2	5	7253644	7277576	E021	89.5101	0.0151296	13.8521	0.00311351	0.760496	13.3662	11.963	14.4379	13.7694	0.333504	0.423413	-0.233835	-0.143927	5	7272037	7272170	134	-
ENSSSCG00000000067	CHADL	5	7248444	7253170	E002	1749.13	0.00754735	9.26248	0.0259972	1	47.5536	45.2747	45.767	45.2475	0.214701	-0.0025905	0.167976	-0.049315	5	7249373	7251073	1701	+
ENSSSCG00000000068	EP300	5	7311171	7393760	E014	165.973	0.00525172	7.92507	0.0475859	1	17.8203	16.6664	17.7131	18.4865	0.208148	0.32315	0.0188373	0.13384	5	7331637	7331876	240	-
ENSSSCG00000000071	ST13	5	7583048	7617762	E012	1765.81	0.000758159	7.96078	0.0468293	1	46.6979	45.9712	46.0069	46.6274	0.0684993	0.061867	0.0651249	0.0584926	5	7603617	7603701	85	+
ENSSSCG00000000071	ST13	5	7583048	7617762	E004	696.596	0.00277897	8.58065	0.0354186	1	33.6757	32.5146	33.8017	32.5899	0.129083	0.00845605	-0.0138453	-0.134473	5	7583472	7583605	134	+
ENSSSCG00000000072	SLC25A17	5	7622646	7670283	E007	217.027	0.00361687	9.5325	0.0229882	1	20.4181	19.6415	19.6963	20.8247	0.123546	0.186722	0.114697	0.177872	5	7658301	7658417	117	+
ENSSSCG00000000075	MRTFA	5	7959312	7972574	E010	123.294	0.00600762	8.58744	0.03531	1	15.8183	15.0663	14.5296	16.038	0.149323	0.191769	0.259998	0.302444	5	7969727	7970365	639	+
ENSSSCG00000000077	ADSL	5	8025508	8047603	E003	14.2453	0.0210881	12.0313	0.00727664	0.898743	5.53682	6.10786	4.26668	5.57247	-0.285756	-0.267087	0.756648	0.775317	5	8027763	8027779	17	-
ENSSSCG00000000077	ADSL	5	8025508	8047603	E005	1.18358	0.202609	8.19199	0.0422061	1	0.558547	1.61793	1.74789	1.95759	-3.06967	0.550329	-3.29278	0.32722	5	8027886	8028252	367	-
ENSSSCG00000000078	TNRC6B	5	8063985	8311429	E027	15.8001	0.0815885	8.22854	0.0415171	1	4.52663	5.89419	6.61161	5.50381	-0.767158	-0.199428	-1.102	-0.534273	5	8242528	8242601	74	-
ENSSSCG00000000078	TNRC6B	5	8063985	8311429	E026	21.2019	0.0946239	8.24294	0.0412488	1	5.17206	6.22834	7.82632	7.32132	-0.54082	0.472166	-1.20836	-0.195378	5	8236426	8236516	91	-
ENSSSCG00000000078	TNRC6B	5	8063985	8311429	E018	85.5115	0.0102891	8.80703	0.0319696	1	13.5794	13.0439	12.2771	11.8851	0.1215	-0.279406	0.303684	-0.0972211	5	8109709	8109884	176	-
ENSSSCG00000000082	CACNA1I	5	8595909	8701367	E026	2.92424	0.464132	9.89048	0.0195204	1	1.33263	3.19275	1.76751	3.1462	-2.52427	-0.042489	-0.815397	1.66638	5	8604148	8604408	261	-
ENSSSCG00000000082	CACNA1I	5	8595909	8701367	E030	2.12178	0.35684	8.12329	0.0435312	1	2.08325	1.32469	1.55234	3.23278	1.30735	2.57756	0.84953	2.11974	5	8609575	8609708	134	-
ENSSSCG00000000082	CACNA1I	5	8595909	8701367	E016	2.08866	0.42115	8.82429	0.0317206	1	1.43047	3.36945	1.36815	0.950716	-2.47561	-3.65485	0.128591	-1.05065	5	8603661	8603807	147	-
ENSSSCG00000000082	CACNA1I	5	8595909	8701367	E028	1.99609	0.391477	11.4529	0.00951293	0.926043	0.712165	2.62315	1.65546	2.69951	-3.76447	0.0829514	-2.43475	1.41267	5	8604859	8604980	122	-
ENSSSCG00000000087	TAB1	5	8826840	8852776	E010	222.681	0.00241686	8.97994	0.0295588	1	19.7124	20.5721	20.2461	20.9741	-0.136163	0.0620833	-0.0850852	0.113161	5	8834758	8834902	145	-
ENSSSCG00000000087	TAB1	5	8826840	8852776	E005	88.4564	0.00558284	11.4082	0.0097113	0.928784	13.1249	13.7664	13.9582	12.2224	-0.144214	-0.358456	-0.186162	-0.400405	5	8831132	8831196	65	-
ENSSSCG00000000092	NPTXR	5	9207642	9230355	E005	7.97702	0.0532155	9.01938	0.0290344	1	4.85575	3.95397	3.98765	3.47818	0.595816	-0.371292	0.571246	-0.395862	5	9225685	9225864	180	+
ENSSSCG00000000094	SUN2	5	9273240	9293254	E003	171.653	0.00353298	12.475	0.00592109	0.861197	18.8949	17.7314	17.7805	17.3682	0.199395	-0.0645281	0.190764	-0.0731595	5	9273291	9273493	203	+
ENSSSCG00000000097	TOMM22	5	9336130	9350015	E006	56.0306	0.0513861	8.17081	0.0426104	1	12.4077	10.026	9.93754	9.90516	0.635296	-0.0358997	0.661534	-0.00966166	5	9338090	9339698	1609	-
ENSSSCG00000000104	ENSSSCG00000000104	5	9485702	9505157	E001	839.873	0.00411925	7.88043	0.0485485	1	36.0991	35.0995	36.3108	34.9659	0.106594	-0.0143704	-0.0223678	-0.143332	5	9485702	9486078	377	+
ENSSSCG00000000105	KDELR3	5	9505206	9515723	E008	860.411	0.00213561	11.4958	0.0093258	0.922	36.5191	35.016	36.2438	35.8997	0.15987	0.0944393	0.0290096	-0.0364215	5	9515461	9515712	252	-
ENSSSCG00000000107	CSNK1E	5	9594934	9620476	E011	90.6567	0.0359573	10.3768	0.0156201	0.986323	13.5085	14.5328	10.8467	13.5591	-0.221787	-0.210477	0.657836	0.669146	5	9613846	9613949	104	+
ENSSSCG00000000110	PLA2G6	5	9713873	9777918	E012	22.9014	0.0474598	8.54447	0.0360026	1	5.75673	7.43808	7.49507	6.78244	-0.747832	-0.269808	-0.770182	-0.292158	5	9743324	9743511	188	+
ENSSSCG00000000114	PICK1	5	9808451	9825539	E001	224.035	0.0086634	7.8156	0.0499805	1	19.4824	20.6698	20.3029	21.2538	-0.188573	0.0895532	-0.131261	0.146865	5	9808451	9809287	837	-
ENSSSCG00000000117	C22orf23	5	9917781	9924662	E005	12.165	0.047952	9.88418	0.0195768	1	4.59383	5.23625	3.74043	5.28835	-0.380087	0.0287794	0.595704	1.00457	5	9922582	9922764	183	+
ENSSSCG00000000118	MICALL1	5	9924652	9956946	E001	613.749	0.00256462	11.1502	0.0109406	0.944648	31.2782	32.2371	30.7123	31.3106	-0.109281	-0.105553	0.0654728	0.0692006	5	9924652	9927441	2790	-
ENSSSCG00000000118	MICALL1	5	9924652	9956946	E019	45.3167	0.0275464	12.9886	0.00466135	0.820318	9.58822	8.51028	11.1468	9.35296	0.351545	0.27817	-0.446896	-0.520271	5	9956682	9956946	265	-
ENSSSCG00000000118	MICALL1	5	9924652	9956946	E014	93.4528	0.0178185	11.757	0.00826375	0.908988	14.6223	12.0866	14.0168	13.9121	0.575203	0.423864	0.128608	-0.0227309	5	9942801	9943255	455	-
ENSSSCG00000000119	EIF3L	5	9968428	10000092	E021	8.30411	0.136567	7.86432	0.0489007	1	3.13594	4.75667	5.09732	3.47149	-1.207	-0.912838	-1.40786	-1.11369	5	9996025	9996025	1	-
ENSSSCG00000000119	EIF3L	5	9968428	10000092	E009	1316.2	0.000999333	12.9113	0.0048324	0.825801	42.6533	41.396	41.5777	41.6478	0.123428	0.024853	0.105489	0.00691367	5	9980212	9980383	172	-
ENSSSCG00000000119	EIF3L	5	9968428	10000092	E022	8.27742	0.131667	8.0302	0.0453917	1	3.19202	4.75633	5.09623	3.39363	-1.15551	-0.978284	-1.35596	-1.17873	5	9996026	9996136	111	-
ENSSSCG00000000119	EIF3L	5	9968428	10000092	E018	28.7219	0.0528553	10.5824	0.0142121	0.973957	8.661	6.16822	8.07018	7.73311	0.993466	0.660697	0.207633	-0.125136	5	9993932	9994259	328	-
ENSSSCG00000000130	CYTH4	5	10489289	10521735	E012	109.219	0.0033354	12.0689	0.00715088	0.898743	15.5025	13.9943	14.5098	14.8249	0.312155	0.175409	0.202229	0.0654838	5	10511707	10511789	83	-
ENSSSCG00000000136	CSF2RB	5	10816376	10840618	E004	192.1	0.00836894	8.21322	0.0418046	1	19.431	18.3563	17.6043	20.1436	0.17942	0.293918	0.310297	0.424794	5	10817710	10817724	15	-
ENSSSCG00000000136	CSF2RB	5	10816376	10840618	E014	146.23	0.00730699	14.4824	0.00231694	0.726036	16.814	17.1624	17.3693	15.006	-0.0636542	-0.413614	-0.100911	-0.45087	5	10825472	10825607	136	-
ENSSSCG00000000136	CSF2RB	5	10816376	10840618	E005	637.893	0.00219996	10.6326	0.0138877	0.96973	31.9501	32.0047	30.3638	32.1935	-0.00619824	0.0213741	0.182953	0.210525	5	10817725	10818490	766	-
ENSSSCG00000000136	CSF2RB	5	10816376	10840618	E003	175.184	0.0078462	9.88076	0.0196074	1	18.6964	17.2944	17.0211	19.5277	0.243893	0.381353	0.293394	0.430853	5	10817707	10817709	3	-
ENSSSCG00000000136	CSF2RB	5	10816376	10840618	E002	183.876	0.00814267	10.7568	0.0131165	0.968437	19.2519	17.5897	17.4011	19.9487	0.283576	0.39641	0.317165	0.429999	5	10817686	10817706	21	-
ENSSSCG00000000137	NCF4	5	10874953	10994014	E029	1.90857	0.374439	7.88836	0.0483762	1	2.33604	1.6277	0.727444	2.63251	1.04354	1.38885	3.3682	3.71351	5	10944193	10944197	5	-
ENSSSCG00000000137	NCF4	5	10874953	10994014	E027	90.9533	0.0105747	9.34586	0.025029	1	14.0611	13.1842	13.6712	11.9402	0.194858	-0.297837	0.085241	-0.407455	5	10897886	10897987	102	-
ENSSSCG00000000137	NCF4	5	10874953	10994014	E016	313.94	0.00425781	8.26055	0.0409229	1	22.5168	23.4799	23.9118	24.0633	-0.137349	0.0811187	-0.197541	0.0209264	5	10892224	10892377	154	-
ENSSSCG00000000137	NCF4	5	10874953	10994014	E020	8.34239	0.140072	17.5405	0.000547028	0.518617	2.19632	4.65085	3.6461	5.07397	-2.17124	0.252812	-1.46578	0.958279	5	10892940	10892950	11	-
ENSSSCG00000000139	IFT27	5	10994215	11017950	E014	0.997727	0.294694	8.29628	0.0402693	1	0.779187	1.86961	0.678262	1.8184	-2.5265	-0.0802117	0.400311	2.8466	5	11015833	11017950	2118	+
ENSSSCG00000000139	IFT27	5	10994215	11017950	E001	81.1453	0.00868341	10.3368	0.0159101	0.987438	11.9835	12.2815	13.8019	12.9285	-0.0736278	0.154318	-0.425429	-0.197484	5	10994215	10994627	413	+
ENSSSCG00000000142	FOXRED2	5	11233902	11254064	E001	6.42578	0.0727541	17.562	0.000541494	0.518617	4.64851	2.26286	3.77055	3.44159	2.08354	1.21242	0.606814	-0.264307	5	11233902	11233945	44	+
ENSSSCG00000000144	TXN2	5	11264645	11283395	E006	596.295	0.00140942	10.3397	0.0158885	0.987438	31.4464	30.2092	31.1438	31.4018	0.143634	0.138521	0.0348034	0.0296906	5	11265443	11265705	263	+
ENSSSCG00000000146	MYH11	3	7002735	7143095	E024	35.6031	0.0165324	9.2029	0.0267114	1	7.934	8.43984	9.77137	8.0001	-0.181493	-0.157153	-0.613424	-0.589084	3	7100374	7100547	174	+
ENSSSCG00000000152	RBFOX2	5	11633541	11903094	E030	23.7663	0.0196701	8.71302	0.03336	1	7.57396	7.02925	7.46637	6.11168	0.218389	-0.408208	0.0418987	-0.584698	5	11903092	11903094	3	+
ENSSSCG00000000152	RBFOX2	5	11633541	11903094	E029	23.0569	0.0184285	9.8442	0.019938	1	7.55252	6.92036	7.31777	5.97548	0.255716	-0.428237	0.0924414	-0.591512	5	11903091	11903091	1	+
ENSSSCG00000000160	PRDM4	5	12638514	12668886	E011	28.6199	0.00939126	18.677	0.000318833	0.493219	7.44574	7.85855	6.41536	8.51249	-0.158108	0.234718	0.435222	0.828049	5	12662663	12662831	169	+
ENSSSCG00000000160	PRDM4	5	12638514	12668886	E007	20.6092	0.0132364	12.7772	0.00514417	0.831683	6.16168	5.98901	7.69884	6.37062	0.0828144	0.180034	-0.650767	-0.553547	5	12656287	12656405	119	+
ENSSSCG00000000171	CKAP4	5	14021131	14030039	E001	1029.58	0.00269403	10.8221	0.012728	0.966269	39.2704	38.132	38.6857	37.7528	0.116192	-0.0390933	0.0594599	-0.0958252	5	14021131	14021776	646	+
ENSSSCG00000000176	DDX23	5	14888958	14899174	E003	150.591	0.00424575	8.11404	0.0437126	1	17.2815	17.6581	15.986	17.1003	-0.0671511	-0.0999159	0.241106	0.208341	5	14891160	14891268	109	-
ENSSSCG00000000179	CCDC65	5	14950492	14959327	E006	4.88383	0.0506231	9.23938	0.0262718	1	3.25345	2.24517	3.33327	3.61978	1.07242	1.38124	-0.0701373	0.238688	5	14957240	14957458	219	+
ENSSSCG00000000184	DDN	5	15026080	15029632	E002	1.28524	0.307408	10.9768	0.0118519	0.952512	2.55237	1.46967	0.712183	1.07263	1.59437	-0.90907	3.68534	1.1819	5	15029403	15029632	230	-
ENSSSCG00000000184	DDN	5	15026080	15029632	E001	18.9445	0.104547	17.772	0.000490141	0.517433	5.82739	6.16275	6.63136	6.36236	-0.162986	0.0929308	-0.376738	-0.120821	5	15026080	15028995	2916	-
ENSSSCG00000000189	LMBR1L	5	15121554	15135252	E022	8.97314	0.078336	15.0432	0.00178012	0.710137	3.55849	4.8422	5.37291	3.24398	-0.892923	-1.16074	-1.19507	-1.46289	5	15135018	15135028	11	-
ENSSSCG00000000189	LMBR1L	5	15121554	15135252	E003	0.799223	0.389874	11.2438	0.010478	0.933916	2.21619	0.0199797	0.721828	1.11344	13.5887	11.6012	3.23839	1.25086	5	15122239	15122343	105	-
ENSSSCG00000000189	LMBR1L	5	15121554	15135252	E023	9.64714	0.0718075	10.6797	0.0135901	0.968875	3.63455	5.15344	5.1631	3.7152	-1.01262	-0.949069	-1.01806	-0.954505	5	15135029	15135074	46	-
ENSSSCG00000000189	LMBR1L	5	15121554	15135252	E021	7.8442	0.0804324	11.26	0.0104	0.933916	3.46395	4.44457	4.93104	3.14375	-0.722218	-1.00289	-1.02366	-1.30433	5	15135014	15135017	4	-
ENSSSCG00000000190	TUBA1B	5	15149099	15153620	E002	1.65303	0.40538	8.73303	0.0330592	1	2.50451	1.34424	2.06968	1.0315	1.79718	-0.764366	0.551003	-2.01055	5	15150021	15150056	36	-
ENSSSCG00000000199	SPATS2	5	15347633	15484935	E012	76.3996	0.0112221	8.45324	0.0375169	1	12.4124	11.4176	12.6036	13.0054	0.250063	0.390431	-0.0459083	0.0944594	5	15472997	15473055	59	+
ENSSSCG00000000202	MCRS1	5	15517032	15526510	E010	189.296	0.00183199	9.52567	0.0230598	1	19.036	18.3532	19.7396	18.8311	0.115004	0.0808619	-0.114961	-0.149103	5	15521511	15521649	139	-
ENSSSCG00000000202	MCRS1	5	15517032	15526510	E009	159.505	0.00302944	10.155	0.0172937	0.996657	17.4161	16.8299	18.4647	17.5941	0.106344	0.138039	-0.182856	-0.151161	5	15519014	15519089	76	-
ENSSSCG00000000202	MCRS1	5	15517032	15526510	E004	214.587	0.00346665	15.1836	0.00166628	0.704405	19.6692	21.3089	19.283	19.697	-0.256198	-0.251724	0.0628693	0.0673431	5	15517953	15518040	88	-
ENSSSCG00000000204	PRPF40B	5	15570474	15592383	E010	24.638	0.0123996	7.97791	0.0464705	1	7.34072	6.55422	7.92074	6.8609	0.331169	0.133518	-0.222801	-0.420453	5	15581645	15581774	130	+
ENSSSCG00000000204	PRPF40B	5	15570474	15592383	E007	17.6684	0.0452909	10.4151	0.0153477	0.984521	5.23473	6.33772	5.13334	6.93211	-0.556575	0.261676	0.0568357	0.875087	5	15580747	15580867	121	+
ENSSSCG00000000204	PRPF40B	5	15570474	15592383	E014	25.6778	0.0157156	14.5379	0.00225736	0.722386	7.38167	6.38173	6.65672	8.32574	0.425256	0.778177	0.302158	0.655079	5	15583173	15583323	151	+
ENSSSCG00000000209	NCKAP5L	5	15711253	15725097	E010	99.9244	0.00635975	10.3227	0.0160132	0.987438	14.7594	13.3514	14.7027	13.849	0.304292	0.110715	0.0117416	-0.181836	5	15721757	15721876	120	-
ENSSSCG00000000217	RACGAP1	5	15904712	15943609	E014	147.199	0.00306219	13.3058	0.00401986	0.800674	16.7035	15.9959	16.8376	17.7794	0.133637	0.327721	-0.024765	0.169319	5	15931024	15931222	199	+
ENSSSCG00000000217	RACGAP1	5	15904712	15943609	E020	110.296	0.0125215	8.65251	0.0342862	1	14.2284	15.8417	14.6122	13.9741	-0.328253	-0.38302	-0.0809875	-0.135755	5	15942723	15942883	161	+
ENSSSCG00000000217	RACGAP1	5	15904712	15943609	E016	116.432	0.00707699	9.487	0.0234701	1	14.5721	14.8907	14.6143	16.1749	-0.0659397	0.253781	-0.00879445	0.310926	5	15940442	15940574	133	+
ENSSSCG00000000223	BIN2	AEMK02000258.1	93259	127449	E011	213.513	0.00181179	18.9881	0.000274955	0.472432	18.8612	19.8905	20.7466	20.517	-0.168288	0.0989586	-0.302906	-0.0356593	AEMK02000258.1	126884	126964	81	+
ENSSSCG00000000233	ACVR1B	5	17314276	17350722	E005	36.8452	0.0249172	7.90976	0.0479141	1	8.94144	7.5915	9.11566	9.00073	0.480757	0.500232	-0.0568768	-0.0374016	5	17335824	17336054	231	+
ENSSSCG00000000234	TAMALIN	5	17355883	17366309	E001	0.409042	0.595746	8.93261	0.0302005	1	0.0154567	0.0150368	0.0180834	1.83911	0.0794694	13.87	-0.452861	13.3377	5	17355883	17355975	93	+
ENSSSCG00000000258	RARG	5	18436270	18458624	E001	821.342	0.00235947	8.055	0.0448886	1	34.3885	35.6857	35.5269	35.481	-0.139565	-0.0218419	-0.122626	-0.00490321	5	18436270	18437378	1109	-
ENSSSCG00000000262	SPRYD3	5	18320759	18338648	E002	262.862	0.00321815	11.1885	0.0107492	0.94031	22.6978	22.0157	21.9229	21.0979	0.0994127	-0.137655	0.113126	-0.123942	5	18321959	18322342	384	-
ENSSSCG00000000271	AMHR2	5	18642823	18648848	E002	1.31533	0.368435	10.7004	0.0134612	0.968875	1.0486	1.54015	1.48275	2.70475	-1.10972	1.62673	-1.00005	1.7364	5	18643321	18643503	183	+
ENSSSCG00000000274	PCBP2	5	18673981	18704978	E027	83.404	0.0445339	10.6129	0.0140142	0.972298	12.7821	14.799	11.4961	12.026	-0.44384	-0.626879	0.317801	0.134762	5	18695375	18696248	874	+
ENSSSCG00000000274	PCBP2	5	18673981	18704978	E028	1.93119	0.390844	13.5985	0.00350584	0.769335	2.52401	2.73993	1.35342	0.0288142	-0.237283	-13.1453	1.79995	-11.1081	5	18696249	18696254	6	+
ENSSSCG00000000290	COPZ1	5	19522613	19542372	E014	1394.83	0.000684972	12.0129	0.00733918	0.898743	42.9348	42.1933	42.8859	43.1465	0.0723857	0.0929453	0.00476099	0.0253206	5	19541031	19541417	387	+
ENSSSCG00000000292	ZNF385A	5	19560318	19583221	E024	0.88244	0.41778	8.60844	0.0349764	1	2.04693	1.86397	0.62603	0.515142	0.270441	-3.71189	3.41976	-0.562569	5	19577001	19577076	76	-
ENSSSCG00000000292	ZNF385A	5	19560318	19583221	E018	5.4354	0.219278	9.80198	0.0203266	1	3.18323	4.99867	2.50131	2.51123	-1.30778	-1.99344	0.697097	0.0114362	5	19566919	19568524	1606	-
ENSSSCG00000000298	ENSSSCG00000000298	5	19753847	19763269	E001	4.21619	0.094144	11.3557	0.00995019	0.929753	2.81787	3.68351	3.16856	1.61102	-0.775108	-2.39041	-0.33925	-1.95455	5	19753847	19753856	10	-
ENSSSCG00000000364	SARNP	5	21199422	21261876	E016	472.214	0.00265763	8.20135	0.0420287	1	28.3921	28.0227	27.2737	28.8661	0.0454485	0.103189	0.138857	0.196598	5	21209714	21209803	90	-
ENSSSCG00000000370	DGKA	5	21331473	21355534	E009	25.4788	0.0118256	13.6533	0.00341709	0.764246	8.02804	6.46965	6.52075	7.55223	0.631342	0.452223	0.608392	0.429272	5	21338710	21338784	75	+
ENSSSCG00000000370	DGKA	5	21331473	21355534	E015	50.4052	0.0107605	8.55729	0.0357946	1	9.50611	9.7867	11.2043	10.1213	-0.0859973	0.0995295	-0.487626	-0.302099	5	21341067	21341186	120	+
ENSSSCG00000000370	DGKA	5	21331473	21355534	E010	23.5962	0.0268997	11.302	0.0102003	0.930427	7.96341	5.92028	6.57615	7.05672	0.86627	0.512294	0.559988	0.206012	5	21339242	21339291	50	+
ENSSSCG00000000379	ESYT1	5	21514510	21535929	E036	257.777	0.00312822	15.9386	0.00116735	0.660987	20.5941	22.458	21.5175	22.5301	-0.279969	0.010461	-0.141095	0.149336	5	21532260	21532408	149	+
ENSSSCG00000000379	ESYT1	5	21514510	21535929	E038	263.717	0.00328531	9.89022	0.0195227	1	21.3438	22.9845	21.4236	22.0364	-0.240814	-0.137456	-0.0120414	0.0913165	5	21532691	21532822	132	+
ENSSSCG00000000379	ESYT1	5	21514510	21535929	E031	194.97	0.00429999	8.58416	0.0353624	1	19.9499	19.2684	19.2893	18.4174	0.11031	-0.142386	0.106878	-0.145818	5	21528810	21528899	90	+
ENSSSCG00000000379	ESYT1	5	21514510	21535929	E037	214.056	0.00174764	22.9448	4.14679e-05	0.250648	18.8096	21.0027	19.7997	20.3692	-0.350941	-0.0981797	-0.162373	0.0903882	5	21532511	21532609	99	+
ENSSSCG00000000379	ESYT1	5	21514510	21535929	E030	168.068	0.00366898	18.2275	0.000394788	0.499029	18.6842	18.6566	17.0059	17.1841	0.00464728	-0.257082	0.294111	0.0323822	5	21528654	21528702	49	+
ENSSSCG00000000393	PAN2	5	21712261	21727903	E003	72.9208	0.0114527	8.26026	0.0409282	1	11.9203	11.1955	11.9917	13.0494	0.187369	0.459206	-0.017883	0.253954	5	21713860	21713953	94	-
ENSSSCG00000000401	GLS2	5	21806406	21820001	E012	2.78029	0.113805	9.13958	0.0274915	1	1.37638	2.06843	2.14495	2.83838	-1.17624	0.914499	-1.28118	0.809559	5	21813045	21813103	59	-
ENSSSCG00000000403	BAZ2A	5	21936260	21983032	E024	93.6886	0.00617603	8.42411	0.0380135	1	14.0674	13.9856	13.0368	12.9721	0.0176955	-0.227409	0.230105	-0.0149994	5	21956839	21956940	102	-
ENSSSCG00000000403	BAZ2A	5	21936260	21983032	E030	59.9568	0.0209148	10.0196	0.0184006	1	11.3008	11.4356	11.1878	9.68522	-0.0353635	-0.493409	0.0299751	-0.428071	5	21961126	21961240	115	-
ENSSSCG00000000406	PTGES3	5	22000341	22021660	E007	750.098	0.000783347	8.12156	0.043565	1	33.7552	33.8342	34.4919	34.1072	-0.00867494	0.0298796	-0.0804457	-0.0418911	5	22003578	22003640	63	-
ENSSSCG00000000406	PTGES3	5	22000341	22021660	E006	29.4113	0.0948231	9.19212	0.0268427	1	7.99568	9.06178	7.53453	6.243	-0.368082	-1.09157	0.174137	-0.549351	5	22002481	22003577	1097	-
ENSSSCG00000000413	MYO1A	5	22338029	22363568	E028	3.33976	0.157281	12.9416	0.00476463	0.825801	2.49009	2.38709	3.02693	0.0135983	0.122085	-14.9135	-0.564445	-15.6001	5	22359843	22360021	179	-
ENSSSCG00000000413	MYO1A	5	22338029	22363568	E005	10.3248	0.104819	8.13566	0.0432896	1	3.59256	4.51626	4.12335	5.14125	-0.663096	0.376289	-0.399181	0.640205	5	22339512	22339644	133	-
ENSSSCG00000000431	MBD6	5	22791437	22799126	E002	45.5606	0.0129912	13.6373	0.00344286	0.764246	9.91561	10.0857	9.96801	8.31624	-0.0503718	-0.569024	-0.0156045	-0.534257	5	22791783	22792076	294	+
ENSSSCG00000000435	ARHGEF25	5	22873736	22880827	E006	14.6572	0.0200588	7.94499	0.0471625	1	5.73659	4.79276	6.17582	5.40119	0.52247	0.347212	-0.214874	-0.390132	5	22876931	22877026	96	+
ENSSSCG00000000435	ARHGEF25	5	22873736	22880827	E015	38.3088	0.0132069	8.61346	0.034897	1	8.25036	9.74641	9.04464	8.51999	-0.491088	-0.396576	-0.270448	-0.175935	5	22879002	22879202	201	+
ENSSSCG00000000436	PIP4K2C	5	22854316	22867028	E007	7.69743	0.0350179	8.40143	0.0384045	1	3.75797	3.16236	4.06861	4.6002	0.499483	1.08566	-0.230093	0.356087	5	22863022	22863060	39	+
ENSSSCG00000000437	ARHGAP9	5	22747339	22762049	E016	69.8061	0.0228621	14.0828	0.00279453	0.753981	12.4517	10.8376	12.924	10.2522	0.414875	-0.164922	-0.111969	-0.691766	5	22752982	22753206	225	-
ENSSSCG00000000443	GLI1	5	22739900	22747421	E010	13.3349	0.0734398	9.27995	0.0257913	1	5.44107	5.15497	5.96303	4.42527	0.157011	-0.443073	-0.266586	-0.86667	5	22743189	22743353	165	+
ENSSSCG00000000444	DCTN2	5	22799287	22814362	E002	17.9754	0.024206	8.47823	0.037096	1	5.69014	6.26516	5.18053	6.71579	-0.280398	0.202648	0.272849	0.755896	5	22799288	22799288	1	-
ENSSSCG00000000449	DTX3	5	22867711	22873393	E007	222.505	0.00536081	12.4982	0.00585752	0.860256	20.1889	21.468	19.4925	20.5042	-0.197201	-0.147678	0.111643	0.161167	5	22872700	22873393	694	+
ENSSSCG00000000453	ATP23	5	23233895	23276036	E004	66.6742	0.00572222	8.80911	0.0319396	1	12.2067	11.017	11.5864	11.4938	0.306374	0.126334	0.156083	-0.0239575	5	23269960	23270097	138	+
ENSSSCG00000000453	ATP23	5	23233895	23276036	E006	132.618	0.0107117	9.14221	0.0274586	1	15.1129	17.0074	16.4809	15.7251	-0.363736	-0.242035	-0.266345	-0.144644	5	23275403	23276036	634	+
ENSSSCG00000000457	USP15	5	26964553	27097444	E017	54.8488	0.0268487	10.4449	0.0151397	0.979974	11.2215	10.69	8.50139	10.0367	0.144438	-0.187113	0.821428	0.489876	5	27031150	27031236	87	+
ENSSSCG00000000458	MON2	5	27126121	27242399	E003	69.3974	0.0149851	11.5804	0.00896806	0.919103	12.0675	11.2772	13.0204	11.0021	0.202449	-0.0735986	-0.228354	-0.504402	5	27126131	27126335	205	+
ENSSSCG00000000458	MON2	5	27126121	27242399	E036	80.6393	0.00478055	7.87851	0.0485905	1	12.7499	13.3051	11.8522	12.7937	-0.128473	-0.11816	0.219055	0.229367	5	27211186	27211314	129	+
ENSSSCG00000000458	MON2	5	27126121	27242399	E043	91.5708	0.010279	9.23497	0.0263246	1	12.8693	13.1588	13.2014	14.6541	-0.067042	0.326319	-0.0768057	0.316556	5	27229215	27229297	83	+
ENSSSCG00000000458	MON2	5	27126121	27242399	E031	123.65	0.00794905	7.84818	0.0492557	1	14.5559	15.9227	16.1175	15.7767	-0.274708	-0.0283275	-0.312158	-0.0657773	5	27198875	27199168	294	+
ENSSSCG00000000458	MON2	5	27126121	27242399	E010	62.6085	0.0358827	10.6162	0.0139933	0.972298	12.1059	11.1014	12.1481	9.5792	0.258801	-0.437504	-0.0104402	-0.706745	5	27153176	27153307	132	+
ENSSSCG00000000466	XPOT	5	28828566	28875325	E001	269.481	0.00623988	8.71959	0.0332611	1	22.6744	21.0745	22.9702	22.3285	0.237265	0.187111	-0.0424317	-0.0925856	5	28828566	28828935	370	+
ENSSSCG00000000477	HELB	5	30645656	30697232	E015	66.2858	0.0304063	9.68444	0.0214481	1	11.0465	12.9641	10.4852	11.7046	-0.47935	-0.306698	0.155074	0.327727	5	30694070	30697232	3163	+
ENSSSCG00000000477	HELB	5	30645656	30697232	E005	7.30735	0.0549265	9.52722	0.0230436	1	4.22192	3.89381	4.51549	3.01469	0.234446	-0.740676	-0.194951	-1.17007	5	30649554	30649723	170	+
ENSSSCG00000000477	HELB	5	30645656	30697232	E001	2.26368	0.279141	7.90006	0.0481229	1	2.72838	1.52537	2.65618	1.50552	1.67972	-0.0378257	0.0775268	-1.64002	5	30645656	30645661	6	+
ENSSSCG00000000477	HELB	5	30645656	30697232	E002	2.6188	0.20901	9.96869	0.0188341	1	2.88893	1.52707	2.89307	1.71049	1.84185	0.327521	-0.00413687	-1.51846	5	30645672	30645673	2	+
ENSSSCG00000000478	GRIP1	5	30697040	31020901	E021	5.55469	0.163853	8.07759	0.0444351	1	4.06987	2.41221	3.53376	3.25195	1.51337	0.863721	0.409115	-0.240535	5	30816838	30817007	170	-
ENSSSCG00000000483	MDM1	5	32640945	32673638	E011	24.262	0.0125673	9.05612	0.028554	1	7.25293	6.98941	7.34594	5.95997	0.108219	-0.464822	-0.0372861	-0.610327	5	32661213	32661316	104	-
ENSSSCG00000000486	NUP107	5	32989794	33042575	E014	59.9124	0.00596713	7.82443	0.049783	1	11.3139	10.3576	11.6631	10.7847	0.262716	0.120047	-0.090748	-0.233418	5	33015964	33016042	79	+
ENSSSCG00000000486	NUP107	5	32989794	33042575	E029	96.1143	0.00932688	9.2747	0.025853	1	14.0571	14.4674	12.5011	13.8365	-0.0874396	-0.135416	0.35416	0.306183	5	33034685	33034810	126	+
ENSSSCG00000000486	NUP107	5	32989794	33042575	E013	62.7958	0.00922567	10.5045	0.0147302	0.977664	11.8174	10.2307	11.5227	11.4031	0.429315	0.322674	0.0754885	-0.0311522	5	33010814	33010902	89	+
ENSSSCG00000000488	MDM2	5	33105759	33137739	E001	7.56659	0.111562	8.66423	0.0341049	1	4.42644	4.55129	3.93829	2.80194	-0.0806859	-1.40461	0.338712	-0.985217	5	33105759	33105770	12	+
ENSSSCG00000000488	MDM2	5	33105759	33137739	E015	245.589	0.00214432	8.25722	0.0409844	1	21.3755	21.0347	21.9034	21.0476	0.051774	0.00197483	-0.078939	-0.128738	5	33135003	33135549	547	+
ENSSSCG00000000493	FRS2	5	33725444	33849953	E001	21.3274	0.0308134	8.39585	0.0385014	1	6.8708	7.30016	6.76849	5.69492	-0.177223	-0.724469	0.0438188	-0.503428	5	33725444	33725603	160	+
ENSSSCG00000000493	FRS2	5	33725444	33849953	E006	4.15384	0.132276	8.88437	0.0308685	1	3.72331	2.00405	2.5342	3.27085	1.7911	1.41605	1.11295	0.737903	5	33823540	33823643	104	+
ENSSSCG00000000496	CCT2	5	33858572	33873523	E008	779.611	0.00172106	8.67994	0.0338633	1	35.2255	34.3033	34.8469	33.9054	0.0996422	-0.043461	0.0407235	-0.10238	5	33862427	33862629	203	+
ENSSSCG00000000502	CNOT2	5	34426394	34549310	E016	231.187	0.0022887	12.6046	0.00557459	0.851655	20.5075	21.4611	19.6915	20.981	-0.14612	-0.0729038	0.129451	0.202668	5	34533994	34534150	157	+
ENSSSCG00000000502	CNOT2	5	34426394	34549310	E012	94.703	0.00632097	8.60828	0.0349789	1	14.4521	12.8778	13.9057	13.7363	0.349095	0.194881	0.117076	-0.0371374	5	34527993	34528072	80	+
ENSSSCG00000000504	PTPRB	5	34659964	34794289	E021	137.202	0.00550428	10.6923	0.0135118	0.968875	15.7499	16.7183	17.3272	16.1638	-0.184051	-0.104206	-0.295082	-0.215237	5	34710149	34710418	270	-
ENSSSCG00000000504	PTPRB	5	34659964	34794289	E016	61.7129	0.00924283	8.25501	0.0410253	1	11.7581	11.5259	11.4031	10.3095	0.0596256	-0.331892	0.0915929	-0.299925	5	34696424	34696573	150	-
ENSSSCG00000000504	PTPRB	5	34659964	34794289	E028	81.3491	0.00773553	10.3154	0.0160665	0.987438	13.5249	12.0204	13.4788	12.5714	0.354833	0.134449	0.0103105	-0.210074	5	34739515	34739784	270	-
ENSSSCG00000000504	PTPRB	5	34659964	34794289	E034	47.2821	0.0212466	8.95682	0.0298706	1	10.0108	8.80835	10.6435	10.2465	0.377855	0.446822	-0.181788	-0.112821	5	34775370	34775620	251	-
ENSSSCG00000000509	ZFC3H1	5	35617266	35671149	E010	32.402	0.0213188	11.6475	0.00869359	0.916269	9.027	7.3367	7.61393	8.49	0.608782	0.428231	0.50018	0.319629	5	35628562	35628760	199	-
ENSSSCG00000000516	KCNC2	5	38326414	38533110	E003	15.4985	0.0587575	8.41122	0.0382352	1	4.56369	6.31734	6.12684	5.44712	-0.945522	-0.431556	-0.85627	-0.342304	5	38327520	38328671	1152	-
ENSSSCG00000000528	PKP2	5	41424845	41508868	E010	3.07469	0.16619	10.1367	0.017439	0.998764	2.48966	2.74943	0.841577	2.72354	-0.286884	-0.0273504	3.13167	3.3912	5	41477313	41477490	178	+
ENSSSCG00000000528	PKP2	5	41424845	41508868	E020	2.74835	0.123686	8.88601	0.0308454	1	2.26243	2.92939	1.18647	2.18882	-0.746777	-0.842346	1.86382	1.76825	5	41508819	41508868	50	+
ENSSSCG00000000530	FGD4	5	41680452	41879062	E022	15.9672	0.0717547	10.432	0.0152293	0.982094	6.29282	5.30621	4.61287	3.77857	0.496418	-0.984991	0.903086	-0.578324	5	41806422	41806440	19	-
ENSSSCG00000000530	FGD4	5	41680452	41879062	E019	22.6504	0.0274414	10.6238	0.0139444	0.97151	7.41532	5.81367	6.33172	5.88844	0.710213	0.0372066	0.461511	-0.211494	5	41744128	41744131	4	-
ENSSSCG00000000536	ERGIC2	5	44334230	44387933	E013	0.667957	0.471195	8.13625	0.0432781	1	1.93659	0.909421	0.922582	0.014416	2.18212	-11.9587	2.14065	-12.0002	5	44348902	44348948	47	+
ENSSSCG00000000536	ERGIC2	5	44334230	44387933	E012	0.512566	0.663945	8.23099	0.0414714	1	1.93753	0.642631	0.0144995	0.0144155	3.18559	-10.9567	14.1256	-0.0167533	5	44348839	44348847	9	+
ENSSSCG00000000536	ERGIC2	5	44334230	44387933	E011	0.881634	0.429246	12.1931	0.00675001	0.892702	2.38355	0.642992	0.648059	0.775488	3.7825	0.540682	3.75984	0.51803	5	44348751	44348838	88	+
ENSSSCG00000000536	ERGIC2	5	44334230	44387933	E022	180.7	0.00430604	8.0882	0.0442235	1	17.8513	19.2025	18.1619	19.043	-0.22936	-0.0263632	-0.0539873	0.149009	5	44380777	44380859	83	+
ENSSSCG00000000547	MRPS35	5	45973693	46030453	E003	13.645	0.0247939	9.85866	0.0198066	1	4.89318	6.45099	4.80692	5.1305	-0.804253	-0.666688	0.051635	0.1892	5	45973739	45973790	52	-
ENSSSCG00000000549	PPFIBP1	5	46031401	46222887	E020	183.57	0.00595595	8.07203	0.0445462	1	19.2866	17.9193	18.6302	18.8008	0.23129	0.150724	0.109265	0.028699	5	46056862	46056977	116	-
ENSSSCG00000000549	PPFIBP1	5	46031401	46222887	E021	270.018	0.0025956	8.41609	0.0381514	1	22.6509	21.6985	22.6771	21.9364	0.139706	0.0353452	-0.00378205	-0.108143	5	46063522	46063676	155	-
ENSSSCG00000000551	ARNTL2	5	46290001	46482461	E008	2.27802	0.214362	7.97774	0.0464741	1	2.734	1.38667	2.32307	2.07198	1.9609	1.15968	0.470753	-0.33047	5	46382718	46382868	151	-
ENSSSCG00000000551	ARNTL2	5	46290001	46482461	E009	2.20702	0.262743	9.19075	0.0268594	1	2.90959	1.75237	2.20264	1.46615	1.46509	-0.514891	0.804557	-1.17542	5	46383021	46383127	107	-
ENSSSCG00000000563	ENSSSCG00000000563	5	48649077	48766390	E008	75.3623	0.0047061	10.3258	0.0159907	0.987438	11.1978	12.5973	12.467	12.6266	-0.35247	0.00697853	-0.321222	0.0382267	5	48662956	48663090	135	-
ENSSSCG00000000567	SOX5	5	49504551	50161558	E022	31.6829	0.0241193	10.5569	0.0143799	0.975492	7.63848	8.19425	8.95033	6.83722	-0.206008	-0.530189	-0.465609	-0.789791	5	50158096	50158312	217	+
ENSSSCG00000000567	SOX5	5	49504551	50161558	E007	1.37315	0.18779	12.5773	0.0056458	0.85326	1.51878	0.613703	1.51617	2.57579	2.61534	4.1412	0.0049671	1.53084	5	49763425	49763496	72	+
ENSSSCG00000000588	PLEKHA5	5	53760824	54016886	E002	1.8185	0.209992	9.23828	0.0262849	1	1.37821	2.48611	2.63873	1.20442	-1.70382	-2.0929	-1.87604	-2.26511	5	53760825	53760825	1	-
ENSSSCG00000000588	PLEKHA5	5	53760824	54016886	E034	64.1159	0.0127953	16.5259	0.000884478	0.623035	12.8446	10.662	11.4007	10.7913	0.556861	0.0358331	0.357375	-0.163653	5	53857537	53857641	105	-
ENSSSCG00000000588	PLEKHA5	5	53760824	54016886	E009	108.544	0.00694928	8.11821	0.0436308	1	13.9664	15.3994	14.3262	14.9163	-0.297763	-0.0975044	-0.0772499	0.123009	5	53769513	53769647	135	-
ENSSSCG00000000588	PLEKHA5	5	53760824	54016886	E022	2.01769	0.141012	11.7367	0.00834192	0.910357	2.09284	1.86868	3.04432	1.20196	0.327219	-1.27405	-1.08318	-2.68446	5	53804644	53804724	81	-
ENSSSCG00000000588	PLEKHA5	5	53760824	54016886	E001	1.8185	0.209992	9.23828	0.0262849	1	1.37821	2.48611	2.63873	1.20442	-1.70382	-2.0929	-1.87604	-2.26511	5	53760824	53760824	1	-
ENSSSCG00000000600	EPS8	5	56817606	57005113	E012	80.9333	0.00834752	12.9322	0.00478559	0.825801	13.5336	11.6472	13.4648	12.3816	0.451152	0.183114	0.0154206	-0.252617	5	56956802	56956938	137	+
ENSSSCG00000000601	PTPRO	5	57019745	57263346	E007	6.05985	0.128784	8.05943	0.0447993	1	3.72104	2.33326	4.2656	2.99958	1.34993	0.726185	-0.395745	-1.01949	5	57031580	57031654	75	-
ENSSSCG00000000612	ATF7IP	5	58022741	58133399	E007	221.114	0.00404934	7.82257	0.0498245	1	21.0257	19.7943	20.4618	20.1984	0.192955	0.0643625	0.0871925	-0.0414	5	58050540	58051178	639	-
ENSSSCG00000000619	FAM234B	5	59413064	59491536	E013	7.03416	0.167538	10.7264	0.0133011	0.968437	4.37705	4.22987	2.05758	3.85487	0.0991766	-0.269026	2.18374	1.81554	5	59453520	59453638	119	-
ENSSSCG00000000625	LRP6	5	60149028	60314662	E011	49.893	0.00737261	11.3562	0.00994756	0.929753	10.1247	9.30535	11.1354	9.90737	0.249543	0.185287	-0.282729	-0.346985	5	60270564	60270853	290	+
ENSSSCG00000000625	LRP6	5	60149028	60314662	E024	40.6034	0.0133853	10.0128	0.018458	1	9.02709	8.51208	8.72448	10.0766	0.172942	0.49794	0.100432	0.42543	5	60309085	60309182	98	+
ENSSSCG00000000625	LRP6	5	60149028	60314662	E019	53.0241	0.00818311	7.94109	0.047245	1	10.9182	10.4239	9.52414	10.7514	0.1377	0.0919092	0.404994	0.359204	5	60297399	60297524	126	+
ENSSSCG00000000625	LRP6	5	60149028	60314662	E009	43.801	0.0100524	14.0577	0.00282772	0.753981	8.44395	10.5008	9.35958	9.6387	-0.643865	-0.253792	-0.303264	0.0868088	5	60249290	60249461	172	+
ENSSSCG00000000633	YBX3	5	61337862	61361279	E001	48.9544	0.0116513	8.51105	0.0365502	1	10.7383	9.32252	9.32648	10.2673	0.418757	0.285586	0.417503	0.284333	5	61337862	61337862	1	+
ENSSSCG00000000634	STYK1	5	61397025	61421406	E007	2.38157	0.134612	12.4393	0.00602027	0.865938	2.00642	2.15248	0.0100488	2.71874	-0.202989	0.674926	15.2845	16.1624	5	61406946	61407127	182	+
ENSSSCG00000000640	ENSSSCG00000000640	5	61624596	61629248	E006	25.9871	0.0311065	8.23678	0.0413635	1	7.29185	6.49809	8.18588	7.26406	0.336717	0.325544	-0.338983	-0.350156	5	61628598	61629248	651	+
ENSSSCG00000000640	ENSSSCG00000000640	5	61624596	61629248	E002	10.8349	0.0362616	9.59401	0.022352	1	4.74292	5.27932	3.71228	4.45805	-0.31121	-0.490932	0.710269	0.530546	5	61625220	61625300	81	+
ENSSSCG00000000648	CLEC7A	5	61832954	61846434	E015	1.82615	0.214521	8.28944	0.0403937	1	2.84109	1.70518	1.00551	1.75667	1.47501	0.0859071	2.99974	1.61063	5	61845809	61845814	6	+
ENSSSCG00000000653	CD69	5	62077988	62085900	E006	58.0326	0.0157522	7.81792	0.0499286	1	10.4816	10.8598	9.48448	11.3947	-0.105355	0.143247	0.296011	0.544614	5	62084795	62084963	169	+
ENSSSCG00000000656	CLEC2B	5	61996760	62018895	E005	289.075	0.00216233	9.1802	0.0269886	1	22.2208	22.7517	21.4697	23.1988	-0.0770254	0.0638056	0.111473	0.252304	5	62018777	62018895	119	+
ENSSSCG00000000660	A2M	5	62440810	62483678	E032	138.952	0.00504679	13.9014	0.00304242	0.760496	14.4382	16.6314	16.2946	15.4675	-0.433785	-0.223449	-0.370568	-0.160232	5	62479731	62479821	91	+
ENSSSCG00000000661	PHC1	5	62557776	62580651	E015	36.5993	0.0230454	12.2671	0.00652214	0.884077	9.34373	8.41533	7.2974	9.0801	0.308244	0.223813	0.726219	0.641787	5	62573121	62573252	132	-
ENSSSCG00000000664	A2ML1	5	62609408	62648400	E004	1.97965	0.341643	8.71359	0.0333515	1	1.35313	2.78534	1.27158	2.34117	-2.08538	-0.502116	0.179423	1.76269	5	62609408	62609476	69	-
ENSSSCG00000000664	A2ML1	5	62609408	62648400	E024	1.2125	0.308878	7.82312	0.0498124	1	2.04208	1.40117	0.010653	2.02652	1.08766	1.06556	15.1669	15.1448	5	62629533	62629678	146	-
ENSSSCG00000000664	A2ML1	5	62609408	62648400	E020	1.11866	0.689047	8.07983	0.0443903	1	2.56394	1.39916	0.0106543	0.957851	1.74938	-1.09377	15.8241	12.9809	5	62625433	62625544	112	-
ENSSSCG00000000664	A2ML1	5	62609408	62648400	E003	2.0338	0.313903	13.2781	0.00407223	0.800674	1.11161	3.04464	1.27779	2.25553	-2.91031	-0.867214	-0.40215	1.64095	5	62606025	62606127	103	-
ENSSSCG00000000664	A2ML1	5	62609408	62648400	E005	2.07724	0.192264	8.49167	0.0368716	1	1.3601	2.8615	1.67543	2.20251	-2.14855	-0.756516	-0.60201	0.790023	5	62610280	62610370	91	-
ENSSSCG00000000679	LRRC23	5	63809546	63817225	E010	1.09251	0.499803	11.5647	0.00903322	0.919103	1.95252	0.017758	2.4568	1.53879	13.5629	12.8753	-0.663737	-1.35137	5	63817129	63817225	97	-
ENSSSCG00000000680	GPR162	5	63885715	63891219	E002	17.4414	0.0376706	9.53068	0.0230072	1	5.47435	6.76078	5.2143	5.85649	-0.615013	-0.418663	0.141495	0.337845	5	63885718	63886474	757	-
ENSSSCG00000000681	P3H3	5	63871508	63885034	E014	248.224	0.00251925	15.5779	0.00138385	0.689071	21.9882	20.3957	21.8235	21.684	0.242154	0.197001	0.0243886	-0.0207643	5	63883335	63883487	153	-
ENSSSCG00000000681	P3H3	5	63871508	63885034	E015	324.053	0.00755034	12.7375	0.0052401	0.833541	25.4861	23.6012	24.3194	23.3715	0.256035	-0.0322277	0.156746	-0.131516	5	63884350	63885034	685	-
ENSSSCG00000000684	USP5	5	63843745	63858716	E002	334.13	0.00242072	10.1894	0.0170229	0.992103	23.4942	25.1915	24.7915	24.333	-0.231933	-0.11581	-0.178345	-0.0622216	5	63845193	63845694	502	-
ENSSSCG00000000684	USP5	5	63843745	63858716	E001	546.359	0.00810962	9.75544	0.0207636	1	28.5842	31.2918	29.853	30.4504	-0.320417	-0.0975901	-0.152493	0.0703349	5	63843745	63844373	629	-
ENSSSCG00000000684	USP5	5	63843745	63858716	E011	245.516	0.00343075	8.05326	0.0449237	1	21.3162	21.9296	20.2991	21.6732	-0.0917609	-0.0380999	0.156914	0.210575	5	63848089	63848177	89	-
ENSSSCG00000000688	LAG3	5	63929625	63935410	E003	16.1321	0.0351935	9.28525	0.0257292	1	4.86546	6.21266	5.29906	5.90864	-0.71097	-0.146177	-0.248001	0.316793	5	63930512	63930754	243	-
ENSSSCG00000000688	LAG3	5	63929625	63935410	E006	6.267	0.112076	13.6542	0.00341578	0.764246	3.80841	2.4166	4.26562	4.32226	1.31574	1.68253	-0.328543	0.0382432	5	63933860	63934125	266	-
ENSSSCG00000000688	LAG3	5	63929625	63935410	E004	12.2263	0.0731351	14.8954	0.0019083	0.710137	5.64656	5.14357	3.28601	4.77551	0.27128	-0.215624	1.57013	1.08323	5	63932298	63932573	276	-
ENSSSCG00000000690	MLF2	5	63951722	63957141	E008	20.477	0.0465643	8.72026	0.0332509	1	6.85717	5.31194	7.34942	6.31814	0.743929	0.504992	-0.202705	-0.441643	5	63954148	63954183	36	+
ENSSSCG00000000691	COPS7A	5	63957064	63977424	E014	253.065	0.00155701	10.4557	0.0150643	0.979073	21.049	21.527	21.354	22.3736	-0.0724056	0.125167	-0.0463459	0.151226	5	63974375	63974463	89	-
ENSSSCG00000000693	NCAPD2	5	64136505	64167410	E026	143.438	0.00719852	10.4375	0.0151909	0.981223	16.3736	16.1409	17.7515	15.387	0.044162	-0.146997	-0.25086	-0.442019	5	64151984	64152131	148	-
ENSSSCG00000000693	NCAPD2	5	64136505	64167410	E024	136.143	0.00684249	12.0911	0.00707756	0.898743	16.7224	15.1956	16.5761	15.1652	0.29467	-0.00611537	0.0272038	-0.273581	5	64149851	64149985	135	-
ENSSSCG00000000693	NCAPD2	5	64136505	64167410	E013	189.861	0.0019522	9.05497	0.0285689	1	18.261	18.0357	19.1349	19.5278	0.03891	0.25042	-0.147161	0.0643487	5	64141555	64141724	170	-
ENSSSCG00000000693	NCAPD2	5	64136505	64167410	E025	172.711	0.0039908	10.7388	0.0132254	0.968437	18.2363	17.1105	18.7768	17.3459	0.198838	0.0424677	-0.0918018	-0.248172	5	64150336	64150533	198	-
ENSSSCG00000000694	GAPDH	5	64129679	64133991	E017	2533.39	0.00356021	9.78991	0.0204391	1	53.4944	51.6046	52.1681	50.7452	0.170566	-0.0782175	0.11951	-0.129273	5	64133939	64133991	53	-
ENSSSCG00000000694	GAPDH	5	64129679	64133991	E006	8134.22	0.00085744	8.91016	0.0305095	1	70.547	71.4145	71.423	71.6843	-0.0732398	0.0227522	-0.0739567	0.0220353	5	64130087	64130167	81	-
ENSSSCG00000000694	GAPDH	5	64129679	64133991	E012	8684.13	0.00075028	12.3431	0.00629572	0.878671	73.3334	72.1056	72.3446	72.0745	0.103302	-0.00261826	0.0831723	-0.0227483	5	64131353	64131443	91	-
ENSSSCG00000000694	GAPDH	5	64129679	64133991	E007	8881.35	0.000615701	8.51779	0.0364391	1	72.2917	72.9685	72.6478	73.156	-0.0569529	0.0157608	-0.0299745	0.0427392	5	64130252	64130335	84	-
ENSSSCG00000000697	CHD4	5	64065992	64105173	E009	309.397	0.00549322	8.14803	0.0430494	1	24.5894	23.2552	23.5216	23.1887	0.184685	-0.00941115	0.147179	-0.0469173	5	64077879	64078006	128	+
ENSSSCG00000000697	CHD4	5	64065992	64105173	E005	304.03	0.00906902	9.4838	0.0235043	1	24.5066	22.4174	23.8947	23.1456	0.293577	0.104606	0.0839565	-0.105014	5	64076421	64076542	122	+
ENSSSCG00000000697	CHD4	5	64065992	64105173	E010	261.821	0.00546744	12.271	0.00651032	0.884077	23.0534	21.0716	21.8305	21.9116	0.291993	0.126285	0.177729	0.0120209	5	64078256	64078391	136	+
ENSSSCG00000000716	KCNA1	5	65561962	65565116	E001	129.987	0.0101538	8.50129	0.0367117	1	15.7017	15.0759	15.2708	15.8266	0.124615	0.148975	0.085325	0.109685	5	65561962	65564192	2231	-
ENSSSCG00000000720	AKAP3	5	65797376	65819765	E001	1.78012	0.155728	8.0417	0.0451577	1	2.28052	1.05031	2.24487	1.91437	2.23868	1.7331	0.0455269	-0.46005	5	65797376	65797471	96	+
ENSSSCG00000000721	DYRK4	5	65812243	65870092	E011	2.75043	0.191366	8.61818	0.0348226	1	2.15565	2.80685	2.45546	1.2842	-0.762892	-2.25855	-0.376265	-1.87193	5	65835750	65835890	141	-
ENSSSCG00000000734	TSPAN11	5	66853404	66911569	E004	97.2186	0.00385222	9.11963	0.0277419	1	13.6349	13.3415	14.6494	14.1897	0.0657772	0.186694	-0.217933	-0.0970166	5	66874090	66874184	95	+
ENSSSCG00000000736	TEAD4	5	67118317	67194072	E003	6.2771	0.054238	8.97316	0.0296499	1	3.26127	4.39969	3.76313	2.876	-0.867267	-1.23092	-0.414344	-0.777996	5	67130350	67130364	15	-
ENSSSCG00000000739	FOXM1	5	67245694	67263211	E003	61.4812	0.0068481	13.9832	0.00292813	0.760496	11.8672	10.6602	10.3859	10.8718	0.319826	0.0584468	0.397229	0.13585	5	67248947	67249496	550	+
ENSSSCG00000000743	FKBP4	5	67313480	67322028	E014	26.3822	0.0269237	8.88781	0.0308203	1	6.57928	6.84492	7.71668	8.23379	-0.11557	0.541037	-0.46631	0.190297	5	67321633	67321810	178	-
ENSSSCG00000000746	WASHC1	5	67394875	67412431	E018	64.2123	0.0119162	8.38171	0.0387478	1	12.2893	10.9887	11.7208	10.6654	0.334256	-0.0888418	0.141826	-0.281272	5	67412405	67412431	27	-
ENSSSCG00000000746	WASHC1	5	67394875	67412431	E018	64.2123	0.0119162	8.38171	0.0387478	1	12.2893	10.9887	11.7208	10.6654	0.334256	-0.0888418	0.141826	-0.281272	5	67412405	67412431	27	-
ENSSSCG00000000751	CCDC77	5	67725834	67760049	E010	21.4482	0.0191056	11.4382	0.00957777	0.927036	6.17877	6.78994	7.71814	5.87184	-0.275185	-0.423611	-0.650036	-0.798462	5	67754207	67754332	126	+
ENSSSCG00000000753	WNK1	5	68000905	68140755	E001	459.903	0.00613024	8.04195	0.0451526	1	28.1572	27.2789	27.8227	26.5684	0.109361	-0.0902467	0.0413708	-0.158237	5	68000905	68001856	952	+
ENSSSCG00000000753	WNK1	5	68000905	68140755	E027	325.279	0.00882772	9.20495	0.0266865	1	22.4742	24.5381	23.2549	24.6634	-0.289604	0.0169877	-0.111832	0.194759	5	68132458	68132652	195	+
ENSSSCG00000000753	WNK1	5	68000905	68140755	E009	214.034	0.00742828	9.95487	0.0189537	1	20.4942	19.723	18.5847	19.4243	0.122299	-0.0484258	0.310197	0.139472	5	68097828	68098015	188	+
ENSSSCG00000000754	RAD52	5	68143646	68169670	E015	12.2807	0.0460377	9.8245	0.0201184	1	5.87459	4.34434	4.33715	5.16103	0.876678	0.500014	0.881481	0.504817	5	68160838	68160964	127	-
ENSSSCG00000000754	RAD52	5	68143646	68169670	E004	17.6094	0.036371	8.15848	0.0428475	1	5.62123	7.13821	5.75965	5.59484	-0.696747	-0.710436	-0.0707966	-0.0844858	5	68144515	68144581	67	-
ENSSSCG00000000757	ADIPOR2	5	68755811	68807235	E010	2762.7	0.00557995	10.1329	0.0174697	0.998764	51.9784	54.8687	53.2691	53.079	-0.259594	-0.160247	-0.11644	-0.017093	5	68804806	68807235	2430	+
ENSSSCG00000000757	ADIPOR2	5	68755811	68807235	E004	376.757	0.00458235	9.95572	0.0189463	1	26.6147	25.4512	25.6084	25.3821	0.151372	-0.00914171	0.130627	-0.0298871	5	68782717	68782969	253	+
ENSSSCG00000000766	CECR2	5	69621959	69740958	E032	14.6229	0.0386765	8.36468	0.0390465	1	5.49618	6.3658	4.53544	5.6205	-0.427765	-0.362696	0.558054	0.623123	5	69740789	69740958	170	+
ENSSSCG00000000774	USP18	5	70183308	70229572	E001	88.6576	0.00526927	8.34188	0.0394501	1	13.775	13.5773	12.1436	13.1984	0.0437645	-0.0855231	0.379752	0.250464	5	70205042	70205149	108	+
ENSSSCG00000000778	CPNE8	5	70394578	70660195	E007	26.8879	0.0146424	8.68662	0.0337611	1	7.25566	7.35778	8.41295	6.96314	-0.0408987	-0.161223	-0.43393	-0.554254	5	70444081	70444127	47	-
ENSSSCG00000000778	CPNE8	5	70394578	70660195	E001	186.558	0.0135624	9.11147	0.027845	1	18.6862	19.0856	17.5846	19.889	-0.0666794	0.130724	0.190362	0.387766	5	70394578	70397959	3382	-
ENSSSCG00000000779	KIF21A	5	70889000	71029809	E024	26.2004	0.0158489	11.2515	0.0104406	0.933916	7.09797	7.23605	8.10194	6.25338	-0.0563464	-0.426191	-0.387545	-0.757389	5	70930872	70930979	108	-
ENSSSCG00000000779	KIF21A	5	70889000	71029809	E003	103.575	0.00533351	15.0149	0.00180395	0.710137	13.219	15.1458	13.7139	14.6769	-0.413309	-0.0960252	-0.11111	0.206174	5	70889501	70890768	1268	-
ENSSSCG00000000784	LRRK2	5	71800225	71945828	E044	58.0678	0.00650349	12.3714	0.00621325	0.875551	11.2546	10.4301	9.60876	11.3063	0.226305	0.239977	0.469243	0.482915	5	71901238	71901338	101	+
ENSSSCG00000000784	LRRK2	5	71800225	71945828	E014	28.625	0.0152837	8.57328	0.0355367	1	7.06024	8.28445	7.02027	7.31755	-0.468548	-0.363847	0.0165958	0.121297	5	71826791	71826920	130	+
ENSSSCG00000000784	LRRK2	5	71800225	71945828	E030	37.3376	0.0141728	11.6772	0.00857482	0.913257	9.2402	8.81235	8.58232	7.47967	0.139735	-0.481388	0.217579	-0.403545	5	71865675	71865823	149	+
ENSSSCG00000000784	LRRK2	5	71800225	71945828	E002	58.8716	0.0145507	8.95958	0.0298332	1	10.4636	10.3739	12.1552	10.4758	0.0255681	0.029016	-0.446925	-0.443477	5	71800240	71800490	251	+
ENSSSCG00000000784	LRRK2	5	71800225	71945828	E053	82.4588	0.0107443	8.00206	0.0459692	1	11.8563	13.2665	12.645	12.3961	-0.337726	-0.204278	-0.193172	-0.0597246	5	71939404	71939556	153	+
ENSSSCG00000000791	PDZRN4	5	72574302	72940818	E001	11.3459	0.0788787	8.28804	0.0404191	1	4.17425	4.22389	5.99017	4.86638	-0.0342692	0.410787	-1.04921	-0.604155	5	72574302	72575166	865	+
ENSSSCG00000000793	PPHLN1	5	73498730	73697953	E020	205.928	0.00303345	10.1942	0.0169853	0.992103	19.1831	20.6061	18.8641	19.8271	-0.227703	-0.123	0.0529363	0.15764	5	73694214	73694861	648	+
ENSSSCG00000000793	PPHLN1	5	73498730	73697953	E021	397.179	0.00867271	12.4245	0.00606178	0.865938	26.3461	27.7809	24.8206	25.914	-0.181646	-0.237707	0.200981	0.14492	5	73694862	73696396	1535	+
ENSSSCG00000000798	TWF1	5	74868585	74893698	E016	68.4189	0.011878	10.1543	0.0172993	0.996657	12.4625	10.8813	11.2075	12.151	0.405511	0.32957	0.317526	0.241585	5	74879361	74879434	74	-
ENSSSCG00000000798	TWF1	5	74868585	74893698	E014	113.404	0.00528479	10.2107	0.0168571	0.992103	15.828	14.3587	14.6885	14.9106	0.297872	0.114941	0.228721	0.0457894	5	74877622	74877800	179	-
ENSSSCG00000000802	NELL2	5	75505099	75893454	E025	26.8351	0.0163123	14.3567	0.00245773	0.738159	8.38771	7.63998	6.4033	6.8157	0.273989	-0.333962	0.790126	0.182175	5	75836426	75836640	215	-
ENSSSCG00000000807	SLC38A1	5	77009862	77058427	E007	21.6657	0.0139483	19.3427	0.000232228	0.443571	5.39357	7.22671	6.61354	7.30248	-0.853033	0.0305136	-0.59396	0.289586	5	77017366	77017466	101	-
ENSSSCG00000000807	SLC38A1	5	77009862	77058427	E015	21.8459	0.0305814	12.322	0.0063578	0.880972	6.70449	5.75279	7.86483	6.43308	0.44626	0.32566	-0.467029	-0.587629	5	77028106	77028179	74	-
ENSSSCG00000000807	SLC38A1	5	77009862	77058427	E016	30.7126	0.0155426	11.7891	0.00814181	0.908484	8.40129	7.25656	8.81747	7.22933	0.429486	-0.0110005	-0.142239	-0.582726	5	77049090	77049205	116	-
ENSSSCG00000000837	CHST11	5	79788572	80067795	E006	61.6378	0.0220731	9.32937	0.0252176	1	11.3465	10.2324	11.7291	11.0946	0.307344	0.240425	-0.0990664	-0.165985	5	80067271	80067285	15	-
ENSSSCG00000000839	ALDH1L2	5	79492750	79558701	E013	133.769	0.00248725	9.48972	0.0234409	1	16.6575	16.7651	15.4544	16.1103	-0.0199291	-0.123071	0.230903	0.127761	5	79529274	79529424	151	+
ENSSSCG00000000839	ALDH1L2	5	79492750	79558701	E007	120.277	0.00654198	7.98778	0.046265	1	14.8711	15.3073	16.684	15.1675	-0.0884018	-0.0280837	-0.353527	-0.293209	5	79516065	79516199	135	+
ENSSSCG00000000839	ALDH1L2	5	79492750	79558701	E020	133.821	0.00311823	8.57902	0.0354446	1	16.8	15.6144	16.1109	16.3366	0.225676	0.139164	0.129406	0.0428938	5	79545825	79545919	95	+
ENSSSCG00000000840	WASHC4	5	79417130	79474609	E026	74.6213	0.0146098	8.33804	0.0395183	1	13.311	11.9678	11.6709	11.9035	0.319804	-0.0161336	0.39497	0.0590324	5	79462271	79462313	43	-
ENSSSCG00000000840	WASHC4	5	79417130	79474609	E002	79.153	0.00713884	9.20811	0.0266481	1	11.7639	12.3904	13.0987	13.3218	-0.155482	0.218205	-0.322729	0.0509575	5	79422205	79422304	100	-
ENSSSCG00000000840	WASHC4	5	79417130	79474609	E033	47.3766	0.0141766	8.59397	0.035206	1	10.4667	10.0573	9.8893	8.82536	0.11831	-0.385904	0.168204	-0.33601	5	79469743	79469796	54	-
ENSSSCG00000000843	TXNRD1	5	80172260	80236219	E002	237.33	0.00171229	11.2183	0.0106022	0.936939	20.1453	21.4502	20.7774	21.0842	-0.201411	-0.0554842	-0.0988295	0.0470969	5	80172301	80172328	28	-
ENSSSCG00000000843	TXNRD1	5	80172260	80236219	E015	323.116	0.00149508	11.8153	0.00804358	0.908484	23.9281	23.3544	24.9134	24.0421	0.0801158	0.0958639	-0.134286	-0.118538	5	80197334	80197426	93	-
ENSSSCG00000000843	TXNRD1	5	80172260	80236219	E008	546.904	0.00109278	8.76018	0.0326554	1	29.7131	30.4189	29.3295	30.1299	-0.0832596	-0.0339388	0.0457882	0.095109	5	80186951	80187058	108	-
ENSSSCG00000000854	ENSSSCG00000000854	5	80694230	80858598	E064	21.9485	0.092419	8.89476	0.0307233	1	7.16886	5.31326	7.11765	6.59017	0.873138	0.62724	0.0209646	-0.224933	5	80813565	80813690	126	-
ENSSSCG00000000854	ENSSSCG00000000854	5	80694230	80858598	E065	24.8213	0.0602917	8.19586	0.0421327	1	7.77027	5.60331	7.36903	6.95098	0.954435	0.628337	0.155297	-0.170801	5	80818316	80818411	96	-
ENSSSCG00000000854	ENSSSCG00000000854	5	80694230	80858598	E011	61.4012	0.00529434	13.3156	0.00400158	0.80017	10.5625	12.1411	10.7262	10.6023	-0.41551	-0.404359	-0.0456916	-0.0345401	5	80708442	80708635	194	-
ENSSSCG00000000854	ENSSSCG00000000854	5	80694230	80858598	E012	51.988	0.0157588	8.14837	0.0430429	1	9.84493	11.1362	9.6348	9.86642	-0.365913	-0.35946	0.0638128	0.0702658	5	80710811	80710918	108	-
ENSSSCG00000000854	ENSSSCG00000000854	5	80694230	80858598	E067	22.5423	0.0456091	12.0366	0.00725899	0.898743	7.59881	5.33353	6.62595	6.63917	1.03255	0.637797	0.400576	0.00581738	5	80835768	80835853	86	-
ENSSSCG00000000854	ENSSSCG00000000854	5	80694230	80858598	E002	43.2911	0.039103	8.58277	0.0353847	1	8.32734	10.1132	8.42455	9.78107	-0.573179	-0.098873	-0.0341084	0.440197	5	80696726	80696842	117	-
ENSSSCG00000000860	NUP37	5	82091517	82145528	E009	75.7886	0.0065817	8.13503	0.0433019	1	12.2908	11.7695	11.8025	13.0155	0.129835	0.302088	0.121446	0.2937	5	82142398	82142491	94	+
ENSSSCG00000000862	GNPTAB	5	82361872	82460814	E024	143.84	0.00480339	9.8805	0.0196097	1	17.1814	17.1535	15.4562	17.0248	0.0050417	-0.023384	0.326567	0.298141	5	82449489	82449587	99	+
ENSSSCG00000000862	GNPTAB	5	82361872	82460814	E004	98.4583	0.0086115	7.84761	0.0492683	1	14.7986	13.2633	14.3065	13.6328	0.332371	0.0830668	0.103002	-0.146303	5	82385500	82385585	86	+
ENSSSCG00000000862	GNPTAB	5	82361872	82460814	E025	187.683	0.00494765	8.7262	0.0331617	1	19.0869	19.2832	17.717	19.3407	-0.0323499	0.0094298	0.233854	0.275634	5	82452964	82453131	168	+
ENSSSCG00000000862	GNPTAB	5	82361872	82460814	E014	169.604	0.0045054	10.0962	0.0177657	0.99904	17.3763	17.5053	18.9298	18.2233	-0.0230442	0.125638	-0.268292	-0.11961	5	82437425	82437595	171	+
ENSSSCG00000000864	CHPT1	5	82497648	82544264	E008	276.616	0.00242247	8.40861	0.0382803	1	21.9458	22.1171	22.7888	22.9352	-0.0252492	0.118547	-0.122825	0.0209712	5	82507672	82507830	159	-
ENSSSCG00000000869	UTP20	5	82813717	82913155	E049	13.0883	0.0410333	9.72261	0.0210774	1	5.69763	4.17224	5.85116	5.13518	0.904837	0.60261	-0.0773968	-0.379624	5	82885461	82885611	151	-
ENSSSCG00000000869	UTP20	5	82813717	82913155	E005	44.249	0.0291759	8.5304	0.0362321	1	8.46714	10.7742	8.64248	9.5474	-0.712179	-0.358296	-0.0602848	0.293599	5	82817479	82817492	14	-
ENSSSCG00000000869	UTP20	5	82813717	82913155	E004	59.1884	0.0317302	8.34485	0.0393973	1	9.79466	12.4219	9.97163	10.9802	-0.707831	-0.368781	-0.0530022	0.286048	5	82817366	82817476	111	-
ENSSSCG00000000869	UTP20	5	82813717	82913155	E003	49.9558	0.0296929	17.5037	0.000556656	0.518617	8.71886	11.8842	8.62424	10.2227	-0.918495	-0.448527	0.0321099	0.502079	5	82817040	82817166	127	-
ENSSSCG00000000870	ARL1	5	82796121	82815936	E011	4.57954	0.184006	14.0655	0.0028173	0.753981	2.99267	4.4526	2.1396	2.32864	-1.15058	-1.87583	0.969857	0.244616	5	82814505	82815931	1427	+
ENSSSCG00000000874	GAS2L3	5	83560962	83600329	E008	21.419	0.0219085	8.86207	0.0311821	1	6.83634	6.92194	5.51682	6.79729	-0.0363521	-0.053086	0.625001	0.608267	5	83570783	83570846	64	-
ENSSSCG00000000874	GAS2L3	5	83560962	83600329	E007	30.6726	0.0153945	13.46	0.00374038	0.787267	8.07061	8.40979	6.53432	8.14944	-0.120915	-0.0923822	0.617844	0.646376	5	83569984	83570122	139	-
ENSSSCG00000000886	SLC25A3	5	85284311	85292328	E020	91.7844	0.0233531	16.5721	0.000865389	0.619552	14.989	11.8375	14.4771	12.7799	0.713122	0.229819	0.105959	-0.377345	5	85292267	85292304	38	-
ENSSSCG00000000886	SLC25A3	5	85284311	85292328	E003	3870.44	0.00181619	11.341	0.010018	0.929753	57.8039	59.4104	58.5621	59.2899	-0.14072	-0.01052	-0.0665338	0.0636666	5	85284585	85284745	161	-
ENSSSCG00000000886	SLC25A3	5	85284311	85292328	E005	3766.57	0.000966895	12.3311	0.00633091	0.879693	57.5484	58.5601	58.2892	58.9009	-0.0888242	0.0298374	-0.0650812	0.0535804	5	85284836	85284946	111	-
ENSSSCG00000000886	SLC25A3	5	85284311	85292328	E019	818.385	0.00359989	8.22084	0.0416615	1	35.8197	34.5701	35.9006	34.7195	0.1341	0.0161735	-0.00859391	-0.126521	5	85292232	85292266	35	-
ENSSSCG00000000886	SLC25A3	5	85284311	85292328	E011	50.3313	0.0117966	16.6943	0.000816789	0.600282	11.4632	9.30039	9.54637	9.87696	0.620383	0.177762	0.543294	0.100673	5	85290096	85290131	36	-
ENSSSCG00000000886	SLC25A3	5	85284311	85292328	E002	1866.46	0.00289544	8.81562	0.0318455	1	46.0044	47.9118	46.9299	47.5289	-0.178891	-0.0356963	-0.0871411	0.0560533	5	85284316	85284584	269	-
ENSSSCG00000000886	SLC25A3	5	85284311	85292328	E015	1988.36	0.00273832	8.92969	0.0302404	1	48.9106	47.8079	48.5486	47.461	0.102305	-0.0323622	0.0334859	-0.101181	5	85291814	85291974	161	-
ENSSSCG00000000890	NEDD1	5	86693843	86737222	E001	185.824	0.00747693	13.1685	0.00428595	0.806227	17.7285	18.9574	18.4114	19.9999	-0.210328	0.169704	-0.118349	0.261683	5	86693843	86695362	1520	-
ENSSSCG00000000891	LTA4H	5	87486512	87518515	E001	364.169	0.00773312	8.05889	0.0448101	1	25.0169	24.2766	26.221	24.5378	0.100212	0.0356145	-0.158474	-0.223072	5	87486512	87486871	360	+
ENSSSCG00000000893	AMDHD1	5	87553022	87569305	E006	20.0843	0.0658033	10.1622	0.0172362	0.995884	6.35738	7.86364	5.57213	5.80413	-0.621707	-0.886983	0.383987	0.11871	5	87557226	87557350	125	-
ENSSSCG00000000902	NR2C1	5	88231274	88277997	E014	99.3003	0.0118961	10.6464	0.0138002	0.968875	13.3283	15.2764	13.9409	13.5108	-0.414709	-0.373621	-0.135996	-0.0949081	5	88276117	88277997	1881	+
ENSSSCG00000000907	PLXNC1	5	88900234	89055924	E026	127.842	0.0050608	10.6002	0.0140962	0.973906	14.7388	15.2783	15.3196	13.6064	-0.109851	-0.352673	-0.118115	-0.360936	5	88982021	88982105	85	-
ENSSSCG00000000907	PLXNC1	5	88900234	89055924	E004	144.133	0.00487733	7.85114	0.0491905	1	15.8558	15.3141	15.5867	17.4591	0.106682	0.404768	0.0525916	0.350678	5	88908052	88908199	148	-
ENSSSCG00000000925	C12orf29	5	94473174	94489661	E008	40.1637	0.0230814	8.08961	0.0441955	1	8.73838	8.09527	9.58229	9.52189	0.224701	0.477917	-0.271901	-0.0186844	5	94486267	94486384	118	-
ENSSSCG00000000926	CEP290	5	94384415	94474335	E018	13.2337	0.0706222	11.9638	0.00750828	0.898743	5.7263	4.20257	4.49133	6.14471	0.898448	1.10383	0.705742	0.911123	5	94404607	94404779	173	+
ENSSSCG00000000926	CEP290	5	94384415	94474335	E055	33.9382	0.0152811	9.79824	0.0203614	1	7.6923	9.41021	8.42292	7.79997	-0.592826	-0.552082	-0.266303	-0.225559	5	94464422	94464544	123	+
ENSSSCG00000000926	CEP290	5	94384415	94474335	E017	9.04238	0.0432302	10.5842	0.0142003	0.973957	4.61967	3.36186	3.98687	5.0887	0.920903	1.20166	0.427149	0.707903	5	94400604	94400727	124	+
ENSSSCG00000000926	CEP290	5	94384415	94474335	E011	13.7011	0.0697876	8.08403	0.0443067	1	4.55571	4.51333	5.90759	6.05097	0.0271165	0.852154	-0.755191	0.0698464	5	94393614	94393667	54	+
ENSSSCG00000000927	TMTC3	5	94324091	94384154	E012	24.5913	0.035785	8.37353	0.0388909	1	6.49473	6.35103	8.09916	7.57823	0.0652634	0.516267	-0.645939	-0.194935	5	94361344	94361459	116	-
ENSSSCG00000000939	ACSS3	5	100279698	100429165	E001	5.4068	0.0892963	12.4247	0.00606135	0.865938	3.74913	4.09977	2.05249	3.04343	-0.259026	-0.862576	1.74213	1.13858	5	100279698	100279719	22	-
ENSSSCG00000000940	PPFIA2	5	99819430	100279030	E047	31.4946	0.055371	8.34117	0.0394627	1	8.25887	8.62773	8.14332	6.28922	-0.128445	-0.92551	0.0413807	-0.755685	5	100278410	100279017	608	+
ENSSSCG00000000941	METTL25	5	99227750	99358587	E018	19.284	0.0175088	10.691	0.0135197	0.968875	6.41213	5.27995	6.41096	6.84479	0.565616	0.756213	0.000529672	0.191127	5	99334658	99334763	106	-
ENSSSCG00000000941	METTL25	5	99227750	99358587	E019	11.5858	0.031257	8.23477	0.0414009	1	5.00689	3.95168	4.97315	5.3822	0.686513	0.896565	0.0196382	0.22969	5	99334764	99334764	1	-
ENSSSCG00000000950	E2F7	5	104127731	104163212	E003	43.8496	0.0164034	7.99448	0.046126	1	9.61297	8.6067	10.036	8.83866	0.326033	0.078279	-0.127414	-0.375168	5	104136414	104136582	169	+
ENSSSCG00000000950	E2F7	5	104127731	104163212	E002	63.7507	0.0187148	8.97567	0.0296162	1	10.6661	10.8358	11.6536	11.661	-0.0469283	0.218829	-0.263865	0.00189296	5	104133712	104133987	276	+
ENSSSCG00000000951	CSRP2	5	104273168	104295141	E013	44.324	0.00998866	8.74523	0.0328771	1	9.58663	9.73542	8.35634	9.82827	-0.0455339	0.0280787	0.404718	0.478331	5	104293034	104293034	1	+
ENSSSCG00000000951	CSRP2	5	104273168	104295141	E005	0.769859	0.693809	11.5013	0.00930217	0.921492	2.108	1.51687	0.0208304	0.0179145	0.950372	-12.8085	13.3238	-0.435127	5	104285382	104285383	2	+
ENSSSCG00000000951	CSRP2	5	104273168	104295141	E003	3.44689	0.297918	8.20672	0.0419272	1	2.52774	3.41197	3.07729	1.60856	-0.867522	-2.17314	-0.5688	-1.87442	5	104273719	104273736	18	+
ENSSSCG00000000955	TBC1D22A	5	2528921	2787304	E011	130.921	0.00383266	9.46257	0.0237329	1	16.7537	15.3752	16.1169	15.7079	0.264473	0.0656799	0.119703	-0.0790898	5	2758819	2758992	174	-
ENSSSCG00000000955	TBC1D22A	5	2528921	2787304	E010	100.733	0.00444617	8.60011	0.0351084	1	14.641	13.2963	14.419	14.106	0.292208	0.178983	0.0465389	-0.0666864	5	2701220	2701290	71	-
ENSSSCG00000000955	TBC1D22A	5	2528921	2787304	E016	84.0407	0.00570072	8.71205	0.0333747	1	12.3744	12.7057	12.8577	13.8024	-0.0793809	0.249909	-0.115187	0.214103	5	2787150	2787304	155	-
ENSSSCG00000000959	LARGE1	AEMK02000361.1	108449	803248	E017	41.5188	0.00987045	14.8	0.00199578	0.710137	10.4669	8.6889	8.60449	9.16835	0.55016	0.158241	0.578885	0.186965	AEMK02000361.1	637883	638070	188	-
ENSSSCG00000000959	LARGE1	AEMK02000361.1	108449	803248	E003	179.252	0.0135183	9.24756	0.0261742	1	17.4941	18.3188	18.5889	19.5197	-0.144028	0.200284	-0.190014	0.154298	AEMK02000361.1	214428	215896	1469	-
ENSSSCG00000000964	LMF2	5	233401	238266	E003	131.747	0.00960615	9.99425	0.0186151	1	15.6869	15.0994	17.2388	16.2981	0.116966	0.23464	-0.291483	-0.173809	5	234656	234684	29	+
ENSSSCG00000000964	LMF2	5	233401	238266	E014	430.254	0.00212375	8.27161	0.0407196	1	26.464	27.8024	26.8386	27.5367	-0.169123	-0.0331201	-0.0479313	0.0880715	5	237325	237421	97	+
ENSSSCG00000000964	LMF2	5	233401	238266	E002	344.296	0.00461528	12.5906	0.00561107	0.851655	25.2704	23.7146	25.8862	24.4128	0.211625	0.0962116	-0.0811288	-0.196542	5	234256	234509	254	+
ENSSSCG00000000968	SBF1	5	260935	284509	E001	129.116	0.00527694	8.66333	0.0341187	1	16.8186	15.2511	15.89	15.6587	0.301273	0.0808692	0.175334	-0.0450696	5	260935	260993	59	+
ENSSSCG00000000968	SBF1	5	260935	284509	E018	303.417	0.00219978	9.92898	0.0191796	1	22.9375	23.7606	24.1778	22.765	-0.116036	-0.140756	-0.173685	-0.198406	5	271711	271860	150	+
ENSSSCG00000000968	SBF1	5	260935	284509	E045	281.025	0.008972	7.91965	0.0477019	1	21.9668	23.8718	21.7275	22.6096	-0.27249	-0.178588	0.0355094	0.129411	5	283888	283969	82	+
ENSSSCG00000000968	SBF1	5	260935	284509	E013	154.409	0.00779547	8.23324	0.0414294	1	18.2197	17.1478	17.3415	16.3307	0.189232	-0.151201	0.154307	-0.186126	5	269764	269877	114	+
ENSSSCG00000000970	PPP6R2	5	285386	361548	E033	264.541	0.0048839	7.93286	0.0474199	1	22.6607	20.9703	22.3352	22.2465	0.25123	0.191063	0.0472051	-0.0129618	5	319076	319318	243	-
ENSSSCG00000000970	PPP6R2	5	285386	361548	E035	90.3429	0.0191658	9.24124	0.0262496	1	14.0022	11.9262	13.7795	13.9654	0.483466	0.475479	0.0485961	0.0406088	5	341398	341527	130	-
ENSSSCG00000000970	PPP6R2	5	285386	361548	E030	147.235	0.00952094	11.831	0.00798493	0.908484	17.5646	17.3324	17.0158	15.3735	0.0414415	-0.370236	0.0987292	-0.312948	5	308068	308202	135	-
ENSSSCG00000000970	PPP6R2	5	285386	361548	E031	81.733	0.0106608	10.7896	0.0129197	0.968437	13.1466	13.2876	13.0207	11.4355	-0.0321933	-0.450501	0.0290153	-0.389292	5	308203	308205	3	-
ENSSSCG00000000971	HDAC10	5	439808	445334	E023	51.7548	0.0169302	8.43006	0.0379115	1	11.1269	10.3884	9.61786	9.72619	0.204201	-0.195137	0.432453	0.0331158	5	444182	444260	79	+
ENSSSCG00000000972	TUBGCP6	5	445525	470548	E022	84.5176	0.00516412	8.1257	0.043484	1	13.3645	13.472	12.6835	12.216	-0.024214	-0.294639	0.157638	-0.112787	5	463907	464054	148	+
ENSSSCG00000000972	TUBGCP6	5	445525	470548	E039	6.48001	0.131712	9.36023	0.0248657	1	3.20226	4.70071	2.83123	3.27462	-1.1121	-1.04745	0.356178	0.42083	5	465525	465548	24	+
ENSSSCG00000000972	TUBGCP6	5	445525	470548	E020	83.9541	0.0133717	13.3661	0.0039082	0.79615	12.9836	14.0266	11.5203	12.7157	-0.233645	-0.296411	0.358639	0.295873	5	463706	463777	72	+
ENSSSCG00000000974	TRABD	5	485475	494534	E001	75.3033	0.0134039	12.193	0.0067505	0.892702	12.6535	12.8912	12.7292	10.9333	-0.055993	-0.493029	-0.0179378	-0.454974	5	485475	485731	257	-
ENSSSCG00000000985	EXOC2	7	195083	341442	E036	14.6313	0.131552	9.10773	0.0278924	1	6.54313	5.74098	4.56371	4.48731	0.38113	-0.715795	1.04795	-0.0489793	7	321344	321419	76	-
ENSSSCG00000000994	GMDS	7	752592	1285550	E019	1.84594	0.162083	8.45185	0.0375405	1	2.72723	2.09205	1.16584	1.52068	0.766214	-0.921183	2.45446	0.767061	7	1285545	1285550	6	-
ENSSSCG00000000998	RPP40	7	2987271	3005271	E003	56.1669	0.00915701	10.552	0.014412	0.976279	9.73338	10.5983	11.0546	11.2482	-0.252321	0.177123	-0.37772	0.0517237	7	2995820	2995954	135	-
ENSSSCG00000001004	SLC22A23	7	1988696	2131908	E002	195.209	0.0060208	10.2988	0.0161896	0.987685	19.7986	18.2369	18.9958	18.9419	0.259381	0.119283	0.131127	-0.00897116	7	1991018	1992285	1268	-
ENSSSCG00000001009	RIPK1	7	1841239	1880699	E015	636.985	0.0035438	8.52817	0.0362686	1	31.136	32.8572	31.5404	31.7449	-0.195284	-0.125462	-0.0464719	0.02335	7	1878712	1879765	1054	+
ENSSSCG00000001009	RIPK1	7	1841239	1880699	E009	139.127	0.00405761	9.28475	0.025735	1	16.1995	15.7121	16.7746	17.0146	0.0940209	0.245882	-0.10782	0.0440404	7	1867254	1867330	77	+
ENSSSCG00000001010	WRNIP1	7	1656984	1667879	E001	624.586	0.00846482	7.84788	0.0492625	1	32.9762	31.1063	32.0923	30.7785	0.211986	-0.0379627	0.0992718	-0.150677	7	1656984	1657923	940	+
ENSSSCG00000001010	WRNIP1	7	1656984	1667879	E007	877.965	0.00240317	9.03768	0.0287941	1	35.7269	36.1138	35.8878	36.8562	-0.0410576	0.0781112	-0.0171004	0.102068	7	1667153	1667879	727	+
ENSSSCG00000001021	ENSSSCG00000001021	7	4621853	4638176	E001	113.578	0.0039677	8.66829	0.0340423	1	15.1255	15.2031	15.1566	14.0933	-0.015656	-0.231021	-0.00627868	-0.221644	7	4621853	4622502	650	+
ENSSSCG00000001022	SSR1	7	4652921	4685901	E007	1095.35	0.0035514	7.87281	0.0487149	1	38.4218	40.1491	38.7203	39.4247	-0.175013	-0.0729382	-0.0305148	0.0715603	7	4665360	4665423	64	-
ENSSSCG00000001024	RIOK1	7	4750752	4782448	E012	86.8414	0.00593653	9.05989	0.0285052	1	13.3398	13.7192	12.2931	12.6006	-0.0848083	-0.256565	0.245949	0.0741924	7	4766697	4766803	107	+
ENSSSCG00000001025	DSP	7	4862649	4915623	E013	2.85603	0.24767	8.65367	0.0342682	1	1.98896	1.377	3.21328	2.80336	1.06176	2.05354	-1.3865	-0.39472	7	4894615	4894769	155	+
ENSSSCG00000001025	DSP	7	4862649	4915623	E023	2.74156	0.250492	8.8918	0.0307646	1	3.26276	2.24616	0.989181	2.29204	1.0794	0.0584166	3.44727	2.42629	7	4907060	4907158	99	+
ENSSSCG00000001041	PAK1IP1	7	7444789	7456716	E003	141.127	0.00834332	9.4089	0.0243205	1	17.5705	15.6649	16.2052	16.5904	0.355118	0.176896	0.250782	0.0725605	7	7450394	7450514	121	+
ENSSSCG00000001041	PAK1IP1	7	7444789	7456716	E007	201.448	0.0018019	8.24512	0.0412083	1	18.9603	19.8366	18.9902	19.8826	-0.143126	0.00737665	-0.00497521	0.145527	7	7454440	7454539	100	+
ENSSSCG00000001042	MAK	7	7482097	7538282	E015	4.79511	0.0854842	8.52543	0.0363136	1	3.34961	3.74922	2.34963	2.62356	-0.326284	-1.03287	1.0253	0.318711	7	7514047	7514218	172	-
ENSSSCG00000001049	HIVEP1	7	8515901	8661151	E005	281.963	0.0134873	8.82563	0.0317014	1	22.4897	21.5759	23.7203	22.9966	0.134714	0.207627	-0.174892	-0.101978	7	8620882	8626528	5647	+
ENSSSCG00000001049	HIVEP1	7	8515901	8661151	E001	1.41271	0.33039	9.35886	0.0248812	1	2.37891	1.22614	0.676128	2.02162	1.91394	1.44376	3.63186	3.16167	7	8515901	8515996	96	+
ENSSSCG00000001056	RANBP9	7	9976096	10057669	E002	333.396	0.00453515	9.61656	0.0221231	1	24.9074	24.5311	22.9211	24.331	0.0508154	-0.0272592	0.27509	0.197015	7	9980131	9980242	112	-
ENSSSCG00000001061	JARID2	7	11359230	11601401	E012	111.879	0.00277001	12.4928	0.00587225	0.860256	15.3435	14.1759	14.3722	15.4253	0.241427	0.257711	0.199615	0.215898	7	11588861	11588979	119	+
ENSSSCG00000001062	DTNBP1	7	11600795	11720318	E011	90.7332	0.0163555	10.6191	0.0139744	0.972298	14.4833	13.5742	13.2845	12.412	0.196716	-0.269714	0.261913	-0.204518	7	11682727	11682760	34	-
ENSSSCG00000001062	DTNBP1	7	11600795	11720318	E006	386.978	0.00628151	11.8385	0.00795755	0.908484	24.6433	25.298	26.7688	26.995	-0.0877739	0.220126	-0.279135	0.028765	7	11613443	11613598	156	-
ENSSSCG00000001062	DTNBP1	7	11600795	11720318	E009	168.256	0.00627868	10.5043	0.0147315	0.977664	18.596	18.6468	17.133	17.416	-0.00858277	-0.21373	0.256092	0.0509449	7	11673666	11673798	133	-
ENSSSCG00000001064	GMPR	7	12254388	12299531	E006	110.196	0.00800542	9.72083	0.0210945	1	15.0613	13.7668	15.0131	15.0761	0.273447	0.276446	0.00980305	0.0128022	7	12264012	12264095	84	+
ENSSSCG00000001064	GMPR	7	12254388	12299531	E007	176.921	0.0035953	12.8563	0.00495782	0.82965	18.7743	17.5495	18.4121	18.5855	0.211394	0.179575	0.0612762	0.0294572	7	12266621	12266794	174	+
ENSSSCG00000001073	TPMT	7	13820866	13846012	E010	41.7196	0.0169918	11.4125	0.009692	0.928721	9.93353	8.96925	8.30584	7.95198	0.30158	-0.353912	0.527673	-0.127818	7	13845422	13845504	83	-
ENSSSCG00000001078	MBOAT1	7	15532015	15643692	E009	90.7508	0.0128853	9.38714	0.0245628	1	13.5138	12.0552	13.0462	12.7985	0.343706	0.179658	0.106324	-0.0577239	7	15562686	15562740	55	-
ENSSSCG00000001092	TDP2	7	19489384	19502520	E013	26.1266	0.0120019	8.04171	0.0451576	1	7.98535	6.70381	7.65559	6.92943	0.511934	0.0966867	0.123651	-0.291596	7	19502400	19502520	121	-
ENSSSCG00000001095	GMNN	7	19586002	19595344	E003	192.822	0.00260891	8.93876	0.0301162	1	18.3864	18.9731	19.1824	19.6326	-0.0988732	0.108157	-0.133533	0.0734967	7	19591335	19591412	78	+
ENSSSCG00000001095	GMNN	7	19586002	19595344	E006	234.025	0.00274215	8.83462	0.0315725	1	21.3333	21.0407	20.6671	19.8985	0.0444841	-0.178551	0.102006	-0.12103	7	19593618	19593728	111	+
ENSSSCG00000001097	RIPOR2	7	19609358	19838093	E006	64.7551	0.0089408	12.2947	0.00643899	0.884077	10.9535	11.0087	10.4759	12.428	-0.0149791	0.362525	0.132516	0.51002	7	19623619	19623821	203	-
ENSSSCG00000001097	RIPOR2	7	19609358	19838093	E028	79.8943	0.0133472	10.5334	0.014536	0.9769	12.185	12.4876	13.6118	11.067	-0.0736104	-0.361172	-0.333482	-0.621044	7	19672018	19672144	127	-
ENSSSCG00000001100	CARMIL1	7	20036944	20353420	E011	29.3272	0.0233796	10.3384	0.0158984	0.987438	8.68304	7.50096	8.16208	6.92033	0.429545	-0.235666	0.181871	-0.48334	7	20210757	20210845	89	+
ENSSSCG00000001100	CARMIL1	7	20036944	20353420	E003	37.223	0.0152595	10.3671	0.0156897	0.987438	9.45846	8.54768	7.52338	9.04105	0.298396	0.165222	0.672979	0.539805	7	20041728	20041825	98	+
ENSSSCG00000001100	CARMIL1	7	20036944	20353420	E014	23.3327	0.0223274	8.15696	0.0428767	1	6.98024	6.19605	6.5281	7.75532	0.347804	0.655981	0.195562	0.503739	7	20227763	20227866	104	+
ENSSSCG00000001131	ENSSSCG00000001131	7	20954224	20965132	E008	4.98186	0.0995136	8.47245	0.0371929	1	3.62258	3.64937	2.66814	2.28316	-0.0213311	-1.35633	0.884669	-0.450328	7	20964382	20964402	21	+
ENSSSCG00000001201	ZKSCAN8	7	21981150	22000819	E003	23.722	0.0211744	8.78161	0.0323399	1	7.37342	6.65644	7.32454	6.48368	0.299006	-0.0767414	0.0194661	-0.356281	7	21989394	21989899	506	+
ENSSSCG00000001201	ZKSCAN8	7	21981150	22000819	E007	131.178	0.0342946	9.58868	0.0224065	1	15.2043	16.9898	15.0313	16.7122	-0.342085	-0.0510697	0.0350097	0.326025	7	21994743	22000819	6077	+
ENSSSCG00000001209	ZSCAN12	7	22186048	22210072	E002	19.1369	0.0267806	8.50379	0.0366703	1	5.36126	6.91011	6.10209	6.6472	-0.739532	-0.113284	-0.376707	0.24954	7	22190765	22191205	441	-
ENSSSCG00000001219	TRIM27	AEMK02000264.1	139267	157020	E002	303.104	0.00483974	9.17131	0.0270979	1	24.2033	22.5691	24.0519	22.9448	0.230156	0.0540048	0.0208268	-0.155324	AEMK02000264.1	139297	140070	774	+
ENSSSCG00000001219	TRIM27	AEMK02000264.1	139267	157020	E008	74.4149	0.00545942	10.1934	0.0169914	0.992103	11.3156	12.4298	11.9544	12.7786	-0.281032	0.0831763	-0.164106	0.200102	AEMK02000264.1	153401	153427	27	+
ENSSSCG00000001235	TRIM15	7	22731274	22743146	E006	9.98337	0.0685054	11.6208	0.00880193	0.916396	4.00442	4.60519	3.81519	2.87891	-0.405308	-1.36041	0.140247	-0.814859	7	22731742	22732110	369	+
ENSSSCG00000001235	TRIM15	7	22731274	22743146	E005	2.04398	0.174937	7.88342	0.0484834	1	1.59162	2.43222	1.41964	0.00680298	-1.22484	-16.966	0.33014	-15.4111	7	22731680	22731741	62	+
ENSSSCG00000001235	TRIM15	7	22731274	22743146	E002	3.09722	0.256134	11.3329	0.0100553	0.929753	1.67199	3.19781	1.42104	0.00698504	-1.87388	-17.6811	0.469539	-15.3377	7	22731543	22731558	16	+
ENSSSCG00000001341	ENSSSCG00000001341	7	23004631	23015536	E006	956.24	0.00644309	8.03395	0.0453152	1	36.9152	38.8396	37.129	36.3202	-0.19859	-0.261083	-0.0223183	-0.0848106	7	23004637	23004967	331	-
ENSSSCG00000001341	ENSSSCG00000001341	7	23004631	23015536	E007	786.172	0.00556274	7.82781	0.0497077	1	34.2284	35.9834	34.6769	33.7012	-0.188613	-0.246337	-0.0486979	-0.106422	7	23004968	23005080	113	-
ENSSSCG00000001341	ENSSSCG00000001341	7	23004631	23015536	E012	1220.45	0.00119987	9.94587	0.0190319	1	40.7735	40.2665	40.9552	41.2952	0.0506128	0.102383	-0.018063	0.033707	7	23005781	23005789	9	-
ENSSSCG00000001341	ENSSSCG00000001341	7	23004631	23015536	E013	1288.49	0.0013817	11.6586	0.00864918	0.916158	41.6425	41.0378	41.5144	42.2148	0.0598032	0.116046	0.0126316	0.0688745	7	23005790	23005813	24	-
ENSSSCG00000001346	ABCF1	7	23126283	23145006	E007	80.7387	0.00743034	8.62538	0.0347095	1	13.5873	12.1495	12.834	12.3197	0.336766	0.0417165	0.172135	-0.122915	7	23132454	23132456	3	+
ENSSSCG00000001346	ABCF1	7	23126283	23145006	E028	185.984	0.00731529	11.9795	0.00745386	0.898743	17.3963	19.6552	18.7762	19.429	-0.383715	-0.0367	-0.239034	0.107982	7	23142882	23142946	65	+
ENSSSCG00000001346	ABCF1	7	23126283	23145006	E030	544.641	0.00600662	11.1632	0.0108755	0.943302	28.6667	31.3573	29.9448	30.1166	-0.317894	-0.144304	-0.153308	0.020283	7	23143270	23143992	723	+
ENSSSCG00000001362	MDC1	7	23229510	23245575	E019	12.1412	0.0495489	9.38537	0.0245826	1	5.81113	4.24753	5.37237	4.30254	0.910399	0.0373063	0.228392	-0.644701	7	23243932	23244127	196	-
ENSSSCG00000001372	GNL1	7	23098179	23112934	E001	308.815	0.0109688	8.87158	0.0310479	1	24.6444	23.2548	24.5251	22.2748	0.192199	-0.140853	0.0161775	-0.316875	7	23098185	23102770	4586	-
ENSSSCG00000001372	GNL1	7	23098179	23112934	E004	152.939	0.00287228	10.0732	0.0179543	1	17.8422	17.678	16.4039	16.7162	0.0288701	-0.173873	0.261067	0.0583237	7	23103498	23103638	141	-
ENSSSCG00000001376	DHX16	7	23189774	23208062	E018	100.015	0.00610447	10.1187	0.0175836	0.998764	14.7726	13.1073	14.1707	14.3486	0.36271	0.274011	0.126628	0.0379293	7	23199886	23200089	204	-
ENSSSCG00000001376	DHX16	7	23189774	23208062	E019	129.074	0.00337067	13.6792	0.00337607	0.764246	16.5036	14.9445	16.435	15.8038	0.304851	0.17129	0.0128721	-0.120688	7	23200261	23200515	255	-
ENSSSCG00000001379	TUBB	7	23247850	23252233	E002	67.7906	0.0105419	9.29395	0.0256275	1	12.3488	11.4305	11.9794	10.7611	0.231266	-0.179773	0.0910284	-0.320011	7	23249122	23249469	348	+
ENSSSCG00000001391	CCHCR1	7	23544121	23558052	E012	29.6178	0.0129292	8.85336	0.0313055	1	8.14167	7.87596	6.69054	8.05366	0.0973611	0.0654553	0.574619	0.542713	7	23547208	23547320	113	-
ENSSSCG00000001395	ENSSSCG00000001395	7	23616984	23621159	E006	1.4383	0.226837	8.92897	0.0302504	1	1.85913	2.50553	0.728179	1.36625	-0.86205	-1.75147	2.70565	1.81622	7	23621031	23621178	148	-
ENSSSCG00000001395	ENSSSCG00000001395	7	23616984	23621159	E006	1.4383	0.226837	8.92897	0.0302504	1	1.85913	2.50553	0.728179	1.36625	-0.86205	-1.75147	2.70565	1.81622	7	23621031	23621178	148	-
ENSSSCG00000001396	ENSSSCG00000001396	7	23622397	23628329	E004	11.1257	0.11029	9.26291	0.025992	1	3.41579	4.47383	5.23217	5.7064	-0.781771	0.706936	-1.23638	0.252322	7	23622506	23622686	181	+
ENSSSCG00000001396	ENSSSCG00000001396	7	23622397	23628329	E004	11.1257	0.11029	9.26291	0.025992	1	3.41579	4.47383	5.23217	5.7064	-0.781771	0.706936	-1.23638	0.252322	7	23622506	23622686	181	+
ENSSSCG00000001396	ENSSSCG00000001396	7	23622397	23628329	E004	11.1257	0.11029	9.26291	0.025992	1	3.41579	4.47383	5.23217	5.7064	-0.781771	0.706936	-1.23638	0.252322	7	23622506	23622686	181	+
ENSSSCG00000001396	ENSSSCG00000001396	7	23622397	23628329	E004	11.1257	0.11029	9.26291	0.025992	1	3.41579	4.47383	5.23217	5.7064	-0.781771	0.706936	-1.23638	0.252322	7	23622506	23622686	181	+
ENSSSCG00000001396	ENSSSCG00000001396	7	23622397	23628329	E004	11.1257	0.11029	9.26291	0.025992	1	3.41579	4.47383	5.23217	5.7064	-0.781771	0.706936	-1.23638	0.252322	7	23622506	23622686	181	+
ENSSSCG00000001398	ENSSSCG00000001398	7	23634648	23638619	E010	123.784	0.0182326	10.0974	0.0177561	0.99904	15.7347	15.4707	16.8033	14.4502	0.0519507	-0.208437	-0.202707	-0.463095	7	23637346	23637621	276	-
ENSSSCG00000001398	ENSSSCG00000001398	7	23634648	23638619	E010	123.784	0.0182326	10.0974	0.0177561	0.99904	15.7347	15.4707	16.8033	14.4502	0.0519507	-0.208437	-0.202707	-0.463095	7	23637346	23637621	276	-
ENSSSCG00000001398	ENSSSCG00000001398	7	23634648	23638619	E010	123.784	0.0182326	10.0974	0.0177561	0.99904	15.7347	15.4707	16.8033	14.4502	0.0519507	-0.208437	-0.202707	-0.463095	7	23637346	23637621	276	-
ENSSSCG00000001398	ENSSSCG00000001398	7	23634648	23638619	E010	123.784	0.0182326	10.0974	0.0177561	0.99904	15.7347	15.4707	16.8033	14.4502	0.0519507	-0.208437	-0.202707	-0.463095	7	23637346	23637621	276	-
ENSSSCG00000001398	ENSSSCG00000001398	7	23634648	23638619	E010	123.784	0.0182326	10.0974	0.0177561	0.99904	15.7347	15.4707	16.8033	14.4502	0.0519507	-0.208437	-0.202707	-0.463095	7	23637346	23637621	276	-
ENSSSCG00000001400	DDX39B	7	23658088	23670031	E031	4.46088	0.117415	9.38121	0.0246293	1	2.15337	3.43307	2.41417	3.66544	-1.34853	0.189604	-0.330309	1.20783	7	23668836	23668994	159	-
ENSSSCG00000001400	DDX39B	7	23658088	23670031	E017	1076.36	0.00263628	8.59323	0.0352177	1	39.2308	38.2261	39.3446	39.1504	0.102517	0.0943617	-0.0115298	-0.0196856	7	23664167	23664343	177	-
ENSSSCG00000001403	LTA	7	23696040	23698299	E005	1.75414	0.184647	8.88349	0.0308808	1	1.17292	2.23964	2.03564	2.1196	-1.86771	-0.159149	-1.59181	0.116754	7	23696990	23697095	106	+
ENSSSCG00000001410	BAG6	7	23756899	23775892	E009	683.659	0.00171857	9.36711	0.024788	1	32.0129	33.2058	32.4859	33.3966	-0.133778	0.0211395	-0.0533905	0.101527	7	23758942	23759066	125	-
ENSSSCG00000001410	BAG6	7	23756899	23775892	E008	756.394	0.00298892	8.15747	0.0428669	1	33.1052	34.4509	34.1015	34.8544	-0.147827	0.0436766	-0.109766	0.0817374	7	23758651	23758797	147	-
ENSSSCG00000001410	BAG6	7	23756899	23775892	E024	222.725	0.00468427	9.31244	0.0254127	1	21.4189	19.877	20.0152	20.1115	0.239398	0.0373484	0.217344	0.0152952	7	23764151	23764204	54	-
ENSSSCG00000001410	BAG6	7	23756899	23775892	E025	383.313	0.00399995	13.6322	0.00345098	0.764246	27.1519	25.6045	25.7377	24.9244	0.199459	-0.0904167	0.181957	-0.107918	7	23764207	23764388	182	-
ENSSSCG00000001413	GPANK1	7	23777127	23780760	E018	20.6432	0.0365665	8.16277	0.0427649	1	7.30925	5.99197	6.87961	5.92476	0.580075	-0.0328557	0.17712	-0.43581	7	23780734	23780750	17	-
ENSSSCG00000001413	GPANK1	7	23777127	23780760	E001	1.27846	0.360957	8.37175	0.0389222	1	2.01275	1.39709	0.0281506	2.08127	1.05429	1.15099	12.3213	12.418	7	23777118	23777124	7	-
ENSSSCG00000001413	GPANK1	7	23777127	23780760	E017	20.4786	0.0393994	8.38184	0.0387455	1	7.28607	6.01715	6.87978	5.81311	0.558567	-0.10046	0.167751	-0.491277	7	23780732	23780733	2	-
ENSSSCG00000001413	GPANK1	7	23777127	23780760	E019	18.9822	0.0481278	8.03421	0.0453099	1	6.93635	5.54527	6.8917	5.69906	0.652473	0.0795943	0.0188718	-0.554007	7	23780751	23780758	8	-
ENSSSCG00000001414	CSNK2B	7	23780362	23788678	E013	571.764	0.00263698	9.57647	0.0225316	1	29.8711	31.4547	30.8353	30.0305	-0.184496	-0.16564	-0.113049	-0.0941942	7	23785650	23785880	231	+
ENSSSCG00000001422	C2	7	23995982	24033930	E004	81.0768	0.012034	11.2457	0.0104689	0.933916	13.8609	11.8855	12.2913	13.0314	0.462955	0.276439	0.362356	0.175841	7	24021584	24021769	186	+
ENSSSCG00000001422	C2	7	23995982	24033930	E009	65.6071	0.00777809	8.33518	0.0395694	1	11.8111	11.8402	12.0378	10.6813	-0.00736554	-0.307139	-0.0569147	-0.356688	7	24026549	24026689	141	+
ENSSSCG00000001423	NELFE	7	24040525	24047025	E005	221.759	0.00289697	8.36029	0.0391238	1	19.9257	21.1538	19.8385	20.2112	-0.191467	-0.14612	0.0139538	0.0593012	7	24042460	24042514	55	-
ENSSSCG00000001424	SKIV2L	7	24047010	24057621	E004	47.9834	0.0207489	8.43064	0.0379016	1	10.4049	9.6071	10.6441	8.90396	0.23625	-0.224265	-0.0675113	-0.528027	7	24047207	24047310	104	+
ENSSSCG00000001424	SKIV2L	7	24047010	24057621	E027	219.827	0.00519492	9.68244	0.0214677	1	19.3567	21.1363	19.9287	20.3847	-0.280774	-0.11615	-0.0924585	0.0721653	7	24055678	24055825	148	+
ENSSSCG00000001424	SKIV2L	7	24047010	24057621	E020	158.607	0.00442472	8.41587	0.0381552	1	17.8114	16.7341	17.1504	18.1555	0.194039	0.253911	0.117827	0.1777	7	24052008	24052220	213	+
ENSSSCG00000001424	SKIV2L	7	24047010	24057621	E021	101.505	0.00574573	12.6211	0.00553205	0.851497	14.8579	13.4289	13.5046	14.8171	0.307093	0.298699	0.290095	0.281701	7	24052303	24052413	111	+
ENSSSCG00000001424	SKIV2L	7	24047010	24057621	E026	227.74	0.00572382	8.66812	0.0340448	1	19.4521	21.1164	20.8741	20.8443	-0.262168	-0.0416961	-0.225066	-0.00459437	7	24055080	24055184	105	+
ENSSSCG00000001425	DXO	7	24056525	24059997	E002	1.8851	0.190494	11.8479	0.00792259	0.908484	1.5175	2.89416	0.932305	1.9308	-1.86523	-1.16967	1.40619	2.10175	7	24057673	24057679	7	-
ENSSSCG00000001425	DXO	7	24056525	24059997	E003	2.0169	0.18915	11.0655	0.0113767	0.94616	1.71227	2.89426	0.932273	2.07834	-1.51665	-0.957071	1.75496	2.31454	7	24057680	24057680	1	-
ENSSSCG00000001426	STK19	7	24059452	24067383	E002	0.931611	0.318157	9.05915	0.0285147	1	2.06434	0.894511	1.7109	0.551254	2.41435	-1.39696	0.54237	-3.26894	7	24060175	24060207	33	+
ENSSSCG00000001427	C4A	7	24068019	24083061	E008	1.24476	0.370837	8.4743	0.0371619	1	0.962701	1.343	0.00635002	2.42772	-0.960944	1.70984	14.4887	17.1595	7	24069228	24069316	89	+
ENSSSCG00000001427	C4A	7	24068019	24083061	E008	1.24476	0.370837	8.4743	0.0371619	1	0.962701	1.343	0.00635002	2.42772	-0.960944	1.70984	14.4887	17.1595	7	24069228	24069316	89	+
ENSSSCG00000001430	ATF6B	7	24161061	24171709	E023	4.24626	0.147284	10.0588	0.0180728	1	3.437	1.62206	2.97599	3.36697	2.17015	2.11057	0.416689	0.357111	7	24165736	24165792	57	-
ENSSSCG00000001433	PPT2	7	24188030	24200704	E015	1.77335	0.233932	8.77248	0.0324739	1	0.98396	2.69541	1.6228	1.98081	-2.91007	-0.890104	-1.44427	0.575697	7	24200705	24200705	1	+
ENSSSCG00000001433	PPT2	7	24188030	24200704	E016	1.68642	0.276254	10.1168	0.017599	0.998764	0.800715	2.69338	1.62128	1.90058	-3.50264	-1.00735	-2.0363	0.458998	7	24200706	24200707	2	+
ENSSSCG00000001435	AGPAT1	7	24204905	24213193	E006	262.649	0.0018962	8.25839	0.0409628	1	22.1257	21.6839	22.1057	22.7029	0.0654335	0.149377	0.00294406	0.0868873	7	24206840	24206935	96	-
ENSSSCG00000001435	AGPAT1	7	24204905	24213193	E011	6.13361	0.16933	12.4679	0.0059408	0.861688	4.13892	2.71973	4.14601	3.05006	1.2153	0.331475	-0.00496493	-0.888793	7	24208429	24209112	684	-
ENSSSCG00000001438	PBX2	7	24221565	24226940	E001	1013.23	0.00431049	8.40555	0.0383332	1	37.1704	39.0788	37.7979	37.6957	-0.196284	-0.141761	-0.0650941	-0.0105708	7	24221565	24223284	1720	-
ENSSSCG00000001438	PBX2	7	24221565	24226940	E005	205.15	0.00281833	8.02898	0.0454166	1	20.2795	19.3915	19.4012	19.2894	0.142402	-0.016716	0.140812	-0.0183059	7	24224360	24224495	136	-
ENSSSCG00000001438	PBX2	7	24221565	24226940	E010	153.209	0.0186621	9.694	0.0213546	1	16.5529	15.9328	17.7206	18.4972	0.117759	0.463875	-0.211776	0.13434	7	24226453	24226940	488	-
ENSSSCG00000001439	GPSM3	7	24227576	24229797	E011	11.6508	0.044245	14.8422	0.00195657	0.710137	4.82909	4.18171	4.02481	6.16504	0.417549	1.12788	0.528385	1.23871	7	24229507	24229619	113	-
ENSSSCG00000001440	NOTCH4	7	24231293	24256281	E019	37.2953	0.04736	7.99835	0.0460458	1	8.72869	9.83382	8.47696	7.89244	-0.351788	-0.647678	0.0860884	-0.209801	7	24238814	24238926	113	-
ENSSSCG00000001440	NOTCH4	7	24231293	24256281	E032	44.9735	0.0157552	12.219	0.00666951	0.888582	10.07	8.56121	10.7369	9.17881	0.479077	0.205159	-0.190307	-0.464225	7	24251468	24251623	156	-
ENSSSCG00000001456	ENSSSCG00000001456	7	24953494	24967506	E012	77.8056	0.0122181	10.3953	0.0154881	0.985527	12.3092	13.2981	13.064	11.3952	-0.232572	-0.463429	-0.178993	-0.40985	7	24959161	24959316	156	+
ENSSSCG00000001456	ENSSSCG00000001456	7	24953494	24967506	E003	18.5719	0.0282991	7.9081	0.0479497	1	7.20084	6.02351	5.661	5.98614	0.521066	-0.0181272	0.701779	0.162585	7	24953483	24953492	10	+
ENSSSCG00000001456	ENSSSCG00000001456	7	24953494	24967506	E009	3254.81	0.00175072	8.01566	0.0456892	1	55.8465	56.014	55.5357	56.7633	-0.0148488	0.0662839	0.0275831	0.108716	7	24958506	24958680	175	+
ENSSSCG00000001456	ENSSSCG00000001456	7	24953494	24967506	E004	20.079	0.0316982	9.86664	0.0197345	1	7.61839	6.34065	5.73378	6.12966	0.536516	-0.0986564	0.829604	0.194431	7	24953493	24953493	1	+
ENSSSCG00000001457	SLA-DQB1	7	24963208	24977386	E003	259.417	0.0112999	10.1117	0.01764	0.998764	20.7012	22.9589	22.6933	21.2669	-0.335485	-0.248804	-0.297396	-0.210715	7	24968604	24969091	488	-
ENSSSCG00000001457	SLA-DQB1	7	24963208	24977386	E003	259.417	0.0112999	10.1117	0.01764	0.998764	20.7012	22.9589	22.6933	21.2669	-0.335485	-0.248804	-0.297396	-0.210715	7	24968604	24969091	488	-
ENSSSCG00000001471	BRD2	7	25152043	25162578	E015	7.16452	0.0747868	14.8029	0.00199309	0.710137	3.7592	4.63358	4.07545	2.41612	-0.606207	-1.88484	-0.234017	-1.51265	7	25152482	25152579	98	+
ENSSSCG00000001471	BRD2	7	25152043	25162578	E016	10.5344	0.0780258	11.6046	0.00886778	0.917855	4.6116	5.65897	4.51758	3.40618	-0.594653	-1.47258	0.0597617	-0.818161	7	25152580	25152660	81	+
ENSSSCG00000001471	BRD2	7	25152043	25162578	E017	4.63949	0.069556	16.1265	0.00106823	0.641301	2.61589	3.91454	3.55339	1.94568	-1.16633	-2.02155	-0.886007	-1.74123	7	25152661	25152899	239	+
ENSSSCG00000001473	COL11A2	7	25204497	25234888	E005	175.587	0.0174152	12.9484	0.00474956	0.824869	14.955	18.8625	18.524	18.198	-0.719598	-0.112736	-0.662595	-0.0557327	7	25204500	25204506	7	-
ENSSSCG00000001473	COL11A2	7	25204497	25234888	E008	6955.95	0.00537473	9.94003	0.0190829	1	67.6045	68.6004	67.3236	69.2919	-0.0846197	0.0586404	0.0239053	0.167165	7	25206648	25206857	210	-
ENSSSCG00000001473	COL11A2	7	25204497	25234888	E059	3015.8	0.00111466	12.6469	0.0054659	0.848991	54.3435	53.9864	54.3742	53.7007	0.031936	-0.0255997	-0.00274361	-0.0602793	7	25221459	25221512	54	-
ENSSSCG00000001473	COL11A2	7	25204497	25234888	E060	3542.83	0.00144451	13.1187	0.00438682	0.811989	57.3577	56.435	57.0312	56.2339	0.0814224	-0.0177965	0.0287705	-0.0704484	7	25221605	25221658	54	-
ENSSSCG00000001473	COL11A2	7	25204497	25234888	E073	4295.43	0.00394764	8.60782	0.0349862	1	61.1535	59.6857	59.3396	60.5647	0.127652	0.0765278	0.157863	0.106739	7	25230879	25231041	163	-
ENSSSCG00000001473	COL11A2	7	25204497	25234888	E001	93.3997	0.0226941	9.28981	0.0256758	1	10.7321	13.9664	14.1194	13.1898	-0.790385	-0.173063	-0.823442	-0.20612	7	25204491	25204496	6	-
ENSSSCG00000001473	COL11A2	7	25204497	25234888	E002	93.3651	0.0244199	9.09395	0.0280675	1	10.7216	13.9826	14.0068	13.3963	-0.796813	-0.129665	-0.80206	-0.134912	7	25204497	25204497	1	-
ENSSSCG00000001473	COL11A2	7	25204497	25234888	E003	100.585	0.0181977	11.3415	0.0100154	0.929753	11.2766	14.4875	14.3961	13.9103	-0.754339	-0.123521	-0.735074	-0.104255	7	25204498	25204498	1	-
ENSSSCG00000001473	COL11A2	7	25204497	25234888	E004	101.473	0.0192591	10.6579	0.0137271	0.968875	11.4062	14.5409	14.4463	13.9474	-0.731441	-0.126633	-0.711582	-0.106774	7	25204499	25204499	1	-
ENSSSCG00000001473	COL11A2	7	25204497	25234888	E077	62.9143	0.00911996	7.93663	0.0473397	1	11.1577	10.4095	11.2416	11.2467	0.20642	0.23008	-0.0223241	0.001336	7	25234853	25234855	3	-
ENSSSCG00000001473	COL11A2	7	25204497	25234888	E074	4423.11	0.00470858	11.6674	0.00861388	0.91361	61.8924	59.7482	60.2657	60.6132	0.186219	0.0752991	0.141135	0.0302151	7	25231498	25231708	211	-
ENSSSCG00000001473	COL11A2	7	25204497	25234888	E075	3910.11	0.00436871	10.0272	0.0183363	1	59.6663	57.4355	58.5452	58.523	0.195454	0.0955063	0.098	-0.00194749	7	25231857	25232006	150	-
ENSSSCG00000001473	COL11A2	7	25204497	25234888	E076	4315.29	0.0041379	15.2699	0.00159998	0.703347	61.5827	59.1944	60.383	59.2879	0.207751	0.00816996	0.104125	-0.0954554	7	25234555	25234852	298	-
ENSSSCG00000001473	COL11A2	7	25204497	25234888	E078	56.6084	0.0131978	8.62707	0.0346829	1	10.6434	9.77492	10.7397	10.7301	0.252363	0.276475	-0.026751	-0.00263832	7	25234856	25234856	1	-
ENSSSCG00000001473	COL11A2	7	25204497	25234888	E079	56.0476	0.0114942	8.09524	0.0440838	1	10.483	9.76926	10.682	10.7202	0.208975	0.275428	-0.0558544	0.0105992	7	25234857	25234888	32	-
ENSSSCG00000001474	RXRB	7	25236007	25242875	E012	166.956	0.00214187	13.2045	0.00421463	0.801309	18.0753	18.1272	18.5005	16.9912	-0.00898281	-0.201767	-0.0729483	-0.265732	7	25238886	25239058	173	-
ENSSSCG00000001474	RXRB	7	25236007	25242875	E001	1.5943	0.173911	10.8794	0.0123962	0.962011	1.7854	0.610826	1.8674	2.48225	3.0959	4.04785	-0.129686	0.822261	7	25236004	25236005	2	-
ENSSSCG00000001475	SLC39A7	7	25242971	25247404	E014	811.846	0.00113519	15.0075	0.00181026	0.710137	35.0005	34.4587	35.8154	35.3802	0.0585681	0.0993215	-0.0871586	-0.0464052	7	25244431	25244595	165	+
ENSSSCG00000001486	LRRC1	7	26860140	26989698	E001	535.259	0.00783392	9.41815	0.0242183	1	28.4647	30.3215	29.8943	29.941	-0.222314	-0.044823	-0.171967	0.00552399	7	26860140	26861687	1548	-
ENSSSCG00000001487	KLHL31	7	27062044	27106111	E003	6.06496	0.28666	12.8657	0.00493631	0.82965	3.18404	2.7579	3.31662	4.91857	0.41555	1.67568	-0.118038	1.1421	7	27098458	27099662	1205	+
ENSSSCG00000001487	KLHL31	7	27062044	27106111	E004	28.1245	0.258626	13.265	0.00409718	0.800674	7.10337	7.84334	7.02868	5.05723	-0.290149	-1.27996	0.0309037	-0.958912	7	27101370	27106111	4742	+
ENSSSCG00000001497	ZNF451	7	28681961	28765326	E005	6.70911	0.206265	10.9168	0.0121846	0.959503	3.095	5.02866	3.71632	2.44691	-1.40648	-2.08581	-0.529493	-1.20883	7	28701166	28704820	3655	-
ENSSSCG00000001499	DST	7	28812252	29300152	E053	15.5171	0.0333719	15.4434	0.00147438	0.691768	5.32917	4.839	7.01739	5.27719	0.280306	0.251816	-0.802009	-0.830499	7	29159634	29159867	234	+
ENSSSCG00000001499	DST	7	28812252	29300152	E033	17.6485	0.0411015	7.93202	0.0474378	1	6.26167	4.82531	6.62331	6.30855	0.757936	0.779687	-0.163791	-0.14204	7	29125812	29125964	153	+
ENSSSCG00000001499	DST	7	28812252	29300152	E034	17.3432	0.0433147	7.91731	0.047752	1	6.09822	4.82646	6.73695	6.09488	0.680156	0.678558	-0.290544	-0.292143	7	29126498	29126652	155	+
ENSSSCG00000001499	DST	7	28812252	29300152	E050	9.93145	0.0345801	16.0039	0.00113192	0.651352	4.23524	3.51082	5.77411	4.34435	0.543416	0.617165	-0.900199	-0.82645	7	29157041	29157190	150	+
ENSSSCG00000001499	DST	7	28812252	29300152	E060	33.6538	0.0363854	9.39789	0.0244429	1	9.03832	7.04559	8.51791	8.57359	0.730893	0.575461	0.174592	0.0191603	7	29178698	29178906	209	+
ENSSSCG00000001505	PFDN6	7	29653679	29654945	E005	410.05	0.00176603	9.94134	0.0190714	1	26.7918	27.3001	25.98	26.3393	-0.064375	-0.122394	0.104602	0.0465833	7	29654715	29654945	231	+
ENSSSCG00000001505	PFDN6	7	29653679	29654945	E002	369.645	0.00189698	11.8163	0.00803962	0.908484	25.5949	24.6908	26.2695	25.4684	0.1206	0.103923	-0.0880038	-0.104681	7	29653842	29653987	146	+
ENSSSCG00000001507	TAPBP	7	29663495	29673634	E004	15.3817	0.0379297	11.1698	0.0108425	0.943302	6.43593	4.82763	5.02422	6.13061	0.83659	0.69489	0.72068	0.57898	7	29664816	29665955	1140	-
ENSSSCG00000001510	KIFC1	7	29694778	29713712	E002	172.609	0.00324806	9.79422	0.0203988	1	18.3999	17.2153	18.5333	17.6192	0.20789	0.0722035	-0.0226869	-0.158374	7	29694804	29694947	144	+
ENSSSCG00000001510	KIFC1	7	29694778	29713712	E008	9.31805	0.0759785	9.07367	0.0283273	1	5.06849	4.54664	3.91085	3.02914	0.315424	-1.17619	0.75212	-0.739492	7	29707161	29707250	90	+
ENSSSCG00000001511	PHF1	7	29714293	29719987	E004	70.6461	0.00965794	15.8794	0.00120043	0.672678	12.1691	12.4785	10.2938	11.8693	-0.0753354	-0.150061	0.498932	0.424206	7	29715850	29715931	82	+
ENSSSCG00000001511	PHF1	7	29714293	29719987	E005	81.1671	0.00773652	8.14331	0.0431409	1	12.8377	13.2829	11.6632	12.607	-0.102769	-0.157325	0.287788	0.233233	7	29716016	29716111	96	+
ENSSSCG00000001511	PHF1	7	29714293	29719987	E002	48.0642	0.010078	12.0051	0.00736565	0.898743	10.724	10.0427	8.98956	9.28878	0.194767	-0.230727	0.522055	0.0965613	7	29714350	29714871	522	+
ENSSSCG00000001511	PHF1	7	29714293	29719987	E016	155.295	0.00741038	8.05412	0.0449063	1	16.6922	17.4323	18.4451	16.5682	-0.134701	-0.157766	-0.311339	-0.334404	7	29719357	29719981	625	+
ENSSSCG00000001511	PHF1	7	29714293	29719987	E012	86.1477	0.00717842	9.0953	0.0280503	1	12.7288	12.3208	13.8235	13.5567	0.0978719	0.287948	-0.249081	-0.0590049	7	29718266	29718370	105	+
ENSSSCG00000001511	PHF1	7	29714293	29719987	E013	93.5065	0.00926993	8.65198	0.0342944	1	12.5089	13.773	13.8513	14.0442	-0.290381	0.0591191	-0.30756	0.0419402	7	29718486	29718675	190	+
ENSSSCG00000001513	SYNGAP1	7	29723588	29753933	E008	12.6358	0.0327866	9.73687	0.0209405	1	5.32106	6.00057	4.01913	4.86822	-0.34971	-0.608117	0.814312	0.555905	7	29735767	29735888	122	+
ENSSSCG00000001513	SYNGAP1	7	29723588	29753933	E011	33.0725	0.0237553	8.27774	0.0406072	1	8.50024	8.13096	9.15421	7.40074	0.130496	-0.275841	-0.218265	-0.624602	7	29740099	29740725	627	+
ENSSSCG00000001513	SYNGAP1	7	29723588	29753933	E020	16.2611	0.0449798	8.22537	0.0415766	1	4.87618	6.16574	5.68515	6.51577	-0.682482	0.161018	-0.446158	0.397342	7	29746051	29746224	174	+
ENSSSCG00000001513	SYNGAP1	7	29723588	29753933	E021	9.70315	0.029436	10.1978	0.0169576	0.992103	3.72412	4.65742	4.30109	5.26308	-0.648253	0.355051	-0.417373	0.585931	7	29747137	29747142	6	+
ENSSSCG00000001516	ENSSSCG00000001516	7	29807021	29815318	E017	19.2813	0.0359374	9.09804	0.0280154	1	5.73547	7.00385	5.4715	6.71058	-0.58264	-0.124957	0.137085	0.594768	7	29815150	29815175	26	-
ENSSSCG00000001517	ENSSSCG00000001517	7	29816343	29819414	E002	3.46995	0.164758	9.31172	0.0254211	1	2.1648	3.76066	2.50449	1.99698	-1.59712	-1.83022	-0.421171	-0.654268	7	29817492	29817607	116	+
ENSSSCG00000001518	ITPR3	7	29835922	29901309	E008	13.918	0.0423801	18.6492	0.000323071	0.493219	5.2965	3.70832	5.84334	5.94484	1.03402	1.37	-0.285834	0.0501467	7	29869432	29869578	147	+
ENSSSCG00000001518	ITPR3	7	29835922	29901309	E009	9.94963	0.0700134	9.86704	0.0197308	1	4.63134	3.31018	4.69863	5.07802	0.973059	1.24039	-0.0418568	0.225473	7	29869694	29869789	96	+
ENSSSCG00000001527	ILRUN	7	30562987	30667146	E001	1904.55	0.00333584	10.6055	0.014062	0.973429	46.3834	47.9642	48.0798	47.681	-0.14801	-0.0263846	-0.158762	-0.0371364	7	30562987	30564888	1902	-
ENSSSCG00000001531	SNRPC	7	30708332	30724045	E003	2.10669	0.365513	9.00308	0.0292499	1	2.81549	2.28777	1.15042	1.43297	0.599926	-1.35108	2.58498	0.633974	7	30708655	30708713	59	+
ENSSSCG00000001534	ANKS1A	7	30812920	30995360	E001	2.01101	0.244261	8.95226	0.0299324	1	2.48191	1.91816	2.61383	0.982275	0.744392	-1.93209	-0.149691	-2.82618	7	30812920	30812994	75	+
ENSSSCG00000001534	ANKS1A	7	30812920	30995360	E020	65.5811	0.00885887	11.1436	0.010974	0.944648	10.4616	11.5032	12.2526	11.825	-0.282566	0.0824595	-0.471423	-0.106398	7	30985710	30985862	153	+
ENSSSCG00000001534	ANKS1A	7	30812920	30995360	E026	58.748	0.00950283	12.7663	0.00517032	0.832846	10.8343	9.76902	11.4662	11.4353	0.306984	0.46786	-0.168931	-0.00805592	7	30989243	30989380	138	+
ENSSSCG00000001534	ANKS1A	7	30812920	30995360	E002	13.1365	0.0449587	7.82395	0.0497939	1	6.21209	4.90912	4.78182	4.74779	0.684762	-0.0970112	0.761044	-0.0207294	7	30812995	30813090	96	+
ENSSSCG00000001534	ANKS1A	7	30812920	30995360	E006	27.0797	0.035635	9.27742	0.025821	1	8.23655	7.8081	6.18293	7.23812	0.156759	-0.221988	0.838799	0.460052	7	30887754	30887834	81	+
ENSSSCG00000001537	ZNF76	7	31161320	31192575	E013	48.4023	0.00606415	10.1159	0.0176065	0.998764	9.04856	10.0395	10.3016	10.3401	-0.307069	0.0874398	-0.38344	0.0110693	7	31190533	31190646	114	+
ENSSSCG00000001538	DEF6	7	31193858	31216414	E003	114.513	0.00301549	7.99976	0.0460168	1	15.1372	14.1637	15.4716	14.8088	0.202605	0.135581	-0.0669193	-0.133944	7	31205032	31205217	186	+
ENSSSCG00000001546	FANCE	7	31313388	31327142	E006	28.0414	0.0193108	8.23435	0.0414087	1	7.38165	6.81249	8.23835	7.94165	0.234606	0.448873	-0.321931	-0.107664	7	31319483	31319626	144	+
ENSSSCG00000001554	SRPK1	7	31645755	31701087	E004	22.3242	0.0668492	11.9359	0.00760586	0.898743	5.69726	7.33692	5.51385	8.06601	-0.737975	0.277644	0.0951992	1.11082	7	31645767	31645826	60	-
ENSSSCG00000001554	SRPK1	7	31645755	31701087	E016	112.332	0.00435621	10.0889	0.0178253	1	15.068	14.6021	15.5386	14.0862	0.0958566	-0.109396	-0.0941886	-0.299441	7	31670650	31670756	107	-
ENSSSCG00000001560	BNIP5	7	32035342	32054632	E009	4.94425	0.125619	8.54675	0.0359654	1	3.14986	2.27697	4.13435	3.3122	0.938166	1.08357	-0.787487	-0.642084	7	32042809	32042870	62	-
ENSSSCG00000001561	ETV7	7	32087430	32108187	E009	8.29318	0.0623796	7.88775	0.0483895	1	4.82035	3.53025	4.48095	3.91816	0.902853	0.301917	0.211876	-0.38906	7	32106039	32106174	136	-
ENSSSCG00000001562	KCTD20	7	32146106	32195072	E002	57.0087	0.0102739	8.97613	0.02961	1	11.2087	9.82961	11.0388	10.9673	0.389864	0.325014	0.0454994	-0.019351	7	32146113	32146228	116	+
ENSSSCG00000001562	KCTD20	7	32146106	32195072	E012	68.4313	0.0152195	10.6725	0.0136353	0.968875	10.6535	13.0103	11.6933	11.484	-0.597833	-0.374242	-0.277547	-0.0539563	7	32192507	32192514	8	+
ENSSSCG00000001562	KCTD20	7	32146106	32195072	E003	66.2591	0.00686882	14.2708	0.00255877	0.744382	12.0163	10.4315	11.7837	12.035	0.421619	0.426284	0.0584932	0.0631584	7	32177786	32177813	28	+
ENSSSCG00000001562	KCTD20	7	32146106	32195072	E004	130.545	0.00681998	25.219	1.3895e-05	0.233698	16.1786	14.3156	16.7529	16.7258	0.374476	0.477249	-0.107803	-0.00503007	7	32177814	32177973	160	+
ENSSSCG00000001562	KCTD20	7	32146106	32195072	E005	172.533	0.0092873	9.01961	0.0290313	1	18.5498	17.111	18.7326	18.5005	0.252277	0.243899	-0.0308578	-0.0392356	7	32182485	32182758	274	+
ENSSSCG00000001563	STK38	7	32206541	32253624	E006	97.6371	0.00847498	14.0091	0.00289283	0.759455	13.8132	13.8266	12.7316	15.0997	-0.00292814	0.268089	0.246162	0.51718	7	32210271	32210394	124	-
ENSSSCG00000001563	STK38	7	32206541	32253624	E020	19.3369	0.0758801	9.34285	0.0250633	1	7.06598	5.80292	7.09972	5.26651	0.574429	-0.282132	-0.0139292	-0.87049	7	32253566	32253615	50	-
ENSSSCG00000001567	CPNE5	7	32409688	32508380	E021	1.23853	0.686001	7.87249	0.0487218	1	1.90617	1.94881	0.00287286	2.19182	-0.0638981	0.33946	18.7493	19.1527	7	32488803	32488849	47	-
ENSSSCG00000001573	PIM1	7	32788291	32793878	E006	905.152	0.00145347	8.10575	0.043876	1	36.0117	35.7429	36.7163	36.3048	0.0285413	0.0595402	-0.0742812	-0.0432823	7	32792325	32792693	369	+
ENSSSCG00000001592	KCNK17	7	34711824	34726018	E004	6.41728	0.121352	8.40515	0.03834	1	3.20525	3.52718	2.86885	4.80256	-0.276991	0.894638	0.320707	1.49234	7	34722591	34722705	115	-
ENSSSCG00000001592	KCNK17	7	34711824	34726018	E002	6.03047	0.105421	13.3467	0.00394387	0.797845	3.5773	3.13724	3.95067	1.6636	0.379882	-1.83308	-0.287522	-2.50048	7	34717569	34717762	194	-
ENSSSCG00000001611	NFYA	7	36385873	36409488	E001	52.0229	0.0288569	9.71774	0.0211243	1	11.0526	8.91443	10.9949	9.98832	0.636595	0.335932	0.0155904	-0.285072	7	36385873	36386719	847	+
ENSSSCG00000001619	FOXP4	7	36754754	36793527	E019	373.792	0.00599752	8.11285	0.0437362	1	24.5285	26.0749	24.7225	25.7818	-0.205375	-0.0382289	-0.0262676	0.140878	7	36791802	36793619	1818	+
ENSSSCG00000001629	USP49	7	36981383	37052568	E010	2.89882	0.384496	7.83134	0.0496291	1	1.56558	2.50495	3.58076	1.9447	-1.35762	-0.731423	-2.3911	-1.7649	7	37050128	37050209	82	-
ENSSSCG00000001641	UBR2	7	37655926	37784359	E006	53.1982	0.0180586	8.7189	0.0332714	1	11.0933	9.68688	10.7133	9.8436	0.402284	0.0474727	0.103714	-0.251097	7	37694332	37694445	114	+
ENSSSCG00000001641	UBR2	7	37655926	37784359	E007	52.8217	0.0264836	9.00068	0.0292818	1	11.1886	9.69569	10.6645	9.42195	0.425099	-0.0846308	0.14279	-0.366939	7	37701803	37701933	131	+
ENSSSCG00000001641	UBR2	7	37655926	37784359	E004	128.013	0.00902166	9.0255	0.0289537	1	16.4607	15.9486	15.515	14.5698	0.0974702	-0.276794	0.182142	-0.192122	7	37665474	37665733	260	+
ENSSSCG00000001646	BICRAL	7	37824242	37933593	E008	5.3144	0.142474	7.88316	0.0484893	1	3.91719	2.95069	3.6275	2.4003	0.820066	-0.596808	0.222523	-1.19435	7	37853474	37853522	49	+
ENSSSCG00000001646	BICRAL	7	37824242	37933593	E010	8.74712	0.0878871	12.6881	0.00536209	0.842319	4.75022	4.01133	4.8936	2.87232	0.490302	-0.966728	-0.0863324	-1.54336	7	37896993	37897038	46	+
ENSSSCG00000001646	BICRAL	7	37824242	37933593	E016	17.3551	0.0266837	8.1543	0.0429282	1	6.51219	6.25831	5.50713	5.25937	0.115977	-0.50616	0.4883	-0.133837	7	37920996	37921057	62	+
ENSSSCG00000001651	CNPY3	7	38014751	38026456	E004	136.344	0.00284488	8.27282	0.0406974	1	16.8057	15.7965	16.7484	15.979	0.191118	0.0353409	0.0105737	-0.145204	7	38014970	38015095	126	+
ENSSSCG00000001651	CNPY3	7	38014751	38026456	E013	131.779	0.00616856	10.0354	0.018268	1	16.6728	16.7943	15.5069	15.2706	-0.0224808	-0.292888	0.22334	-0.0470671	7	38024429	38026456	2028	+
ENSSSCG00000001654	PPP2R5D	7	38055753	38079006	E004	1.90403	0.252463	8.09316	0.0441251	1	2.3895	2.42733	1.83309	0.973204	-0.0454014	-2.63901	0.765758	-1.82785	7	38060978	38061239	262	+
ENSSSCG00000001660	PTK7	7	38135655	38205655	E007	122.424	0.00907186	8.05842	0.0448196	1	15.0142	14.5801	16.45	15.6889	0.0895228	0.224179	-0.280584	-0.145928	7	38177508	38177610	103	+
ENSSSCG00000001660	PTK7	7	38135655	38205655	E008	157.393	0.00475904	10.0406	0.0182237	1	16.5699	17.0845	18.4402	17.4492	-0.094779	0.0656973	-0.333251	-0.172775	7	38178003	38178193	191	+
ENSSSCG00000001660	PTK7	7	38135655	38205655	E017	119.668	0.00281512	8.74253	0.0329174	1	16.1876	15.0147	14.9098	15.4325	0.230858	0.0840117	0.252278	0.105431	7	38188470	38188509	40	+
ENSSSCG00000001660	PTK7	7	38135655	38205655	E018	157.424	0.00314414	9.89939	0.019441	1	18.3055	16.906	17.0587	17.5811	0.248028	0.121738	0.220128	0.0938384	7	38188607	38188734	128	+
ENSSSCG00000001689	GTPBP2	7	38603474	38613647	E009	196.348	0.00445221	9.73253	0.0209821	1	18.4907	18.8069	20.2809	18.7429	-0.0533467	-0.0107334	-0.292694	-0.250081	7	38608652	38608760	109	-
ENSSSCG00000001692	MRPS18A	7	38635967	38657253	E004	565.039	0.00260043	11.2912	0.0102512	0.931831	29.5166	30.9968	30.1689	30.7714	-0.173907	-0.0261263	-0.0773146	0.0704664	7	38641758	38642118	361	-
ENSSSCG00000001695	VEGFA	7	38746052	38761366	E002	1739.3	0.00316985	8.73316	0.0330573	1	46.074	45.871	46.7484	44.9097	0.0191896	-0.0913495	-0.0635395	-0.174079	7	38746475	38747169	695	+
ENSSSCG00000001696	ENSSSCG00000001696	7	39124872	39138732	E005	25.11	0.16603	13.6684	0.0033931	0.764246	8.81992	8.09265	5.37099	5.68746	0.252995	-1.03031	1.44983	0.16653	7	39133258	39135536	2279	-
ENSSSCG00000001698	CAPN11	7	39168991	39191395	E024	19.2852	0.0276404	7.97422	0.0465474	1	5.95763	5.7438	5.79185	4.32195	0.106423	-0.826115	0.0821733	-0.850365	7	39190807	39190847	41	+
ENSSSCG00000001698	CAPN11	7	39168991	39191395	E013	30.7574	0.0127184	7.82663	0.0497339	1	6.88988	7.44835	7.41578	8.08512	-0.227941	0.240469	-0.215111	0.253299	7	39185038	39185210	173	+
ENSSSCG00000001700	SLC29A1	7	39218051	39234685	E029	14.7714	0.0558536	13.2557	0.00411512	0.800674	4.08751	6.45428	5.86078	5.56724	-1.32761	-0.430661	-1.04649	-0.14954	7	39234572	39234682	111	+
ENSSSCG00000001700	SLC29A1	7	39218051	39234685	E027	10.0629	0.0378003	8.07716	0.0444437	1	4.44411	4.50196	3.69481	5.34259	-0.0375159	0.497132	0.535119	1.06977	7	39234125	39234127	3	+
ENSSSCG00000001700	SLC29A1	7	39218051	39234685	E019	114.052	0.00999056	9.03285	0.0288573	1	13.9992	14.6855	15.6826	15.5842	-0.145541	0.181676	-0.346551	-0.0193345	7	39230011	39230037	27	+
ENSSSCG00000001701	HSP90AB1	7	39244458	39250481	E004	1.76057	0.317203	7.85935	0.0490098	1	1.85385	1.48963	0.959136	2.67264	0.631616	1.68851	1.9024	2.95929	7	39244794	39244895	102	+
ENSSSCG00000001702	SLC35B2	7	39247915	39254466	E005	222.262	0.00382605	8.15056	0.0430004	1	20.3266	19.6538	21.033	20.4012	0.107202	0.118922	-0.109507	-0.0977874	7	39253634	39253827	194	-
ENSSSCG00000001703	NFKBIE	7	39255075	39263339	E004	316.757	0.00311482	13.4919	0.00368507	0.784702	24.016	24.3747	23.6424	22.6779	-0.049233	-0.237892	0.0518474	-0.136812	7	39259305	39259527	223	-
ENSSSCG00000001706	AARS2	7	39301009	39313860	E008	41.2747	0.015775	8.77642	0.0324161	1	8.56509	9.97038	8.54946	9.52105	-0.448286	-0.136392	0.00537094	0.317265	7	39303037	39303147	111	-
ENSSSCG00000001708	CDC5L	7	39384556	39431248	E001	149.452	0.00747297	8.17288	0.0425708	1	17.3941	17.8276	16.381	16.1712	-0.0767821	-0.302606	0.186041	-0.0397836	7	39384556	39384734	179	+
ENSSSCG00000001710	RUNX2	7	40106532	40460687	E002	202.551	0.056349	7.99267	0.0461635	1	17.6429	18.6805	20.8868	20.8738	-0.179076	0.352844	-0.533917	-0.00199745	7	40106644	40106823	180	+
ENSSSCG00000001710	RUNX2	7	40106532	40460687	E001	4.5811	0.219904	10.6347	0.0138743	0.969521	1.62815	3.21283	3.63839	3.54104	-1.96416	0.281511	-2.32419	-0.0785214	7	40106532	40106643	112	+
ENSSSCG00000001710	RUNX2	7	40106532	40460687	E011	2409.33	0.00473536	24.609	1.86375e-05	0.233698	51.026	52.5961	50.562	50.3311	-0.142332	-0.205781	0.0423352	-0.0211137	7	40348920	40353299	4380	+
ENSSSCG00000001723	PLA2G7	7	41486598	41531345	E034	1.76282	0.332889	9.95835	0.0189235	1	0.558196	1.51491	2.61699	2.19241	-2.88154	1.06752	-4.46063	-0.511568	7	41507097	41507607	511	-
ENSSSCG00000001723	PLA2G7	7	41486598	41531345	E025	96.704	0.00531426	8.26675	0.0408088	1	14.6741	14.0193	13.1852	13.5131	0.138833	-0.111377	0.324407	0.0741973	7	41492723	41492723	1	-
ENSSSCG00000001727	TNFRSF21	7	42020227	42091448	E002	740.374	0.00727055	7.90609	0.0479929	1	33.3749	34.9216	32.6909	34.4185	-0.16885	-0.0544449	0.0761133	0.190518	7	42020228	42021660	1433	-
ENSSSCG00000001727	TNFRSF21	7	42020227	42091448	E012	122.903	0.00568958	9.90587	0.0193835	1	15.815	14.9252	16.5386	15.1666	0.177433	0.0490458	-0.137921	-0.266307	7	42091241	42091425	185	-
ENSSSCG00000001732	MMUT	7	43597246	43624671	E006	107.366	0.00501324	8.08013	0.0443844	1	13.7292	14.8517	14.6718	15.0936	-0.238906	0.0493578	-0.201741	0.0865232	7	43606777	43606892	116	-
ENSSSCG00000001732	MMUT	7	43597246	43624671	E010	110.559	0.00346201	11.7369	0.00834118	0.910357	15.5918	14.2683	14.9846	14.2419	0.270889	-0.00563607	0.121629	-0.154896	7	43616015	43616186	172	-
ENSSSCG00000001735	RHAG	7	43703876	43729995	E011	461.012	0.00417716	8.91817	0.0303989	1	26.604	26.0385	26.9261	25.2581	0.0729823	-0.102612	-0.0410942	-0.216689	7	43713678	43713844	167	-
ENSSSCG00000001735	RHAG	7	43703876	43729995	E012	420.48	0.00427693	9.89411	0.019488	1	25.6778	25.1361	25.5332	23.9117	0.0717133	-0.166367	0.0190311	-0.21905	7	43714387	43714534	148	-
ENSSSCG00000001750	PAQR8	7	46104677	46234449	E011	1.53013	0.242597	10.6246	0.0139393	0.971424	1.47655	2.30111	0.00871656	2.02261	-1.28139	-0.372693	14.8094	15.718	7	46233277	46234449	1173	+
ENSSSCG00000001756	IREB2	7	47478706	47529242	E007	88.6047	0.0075009	8.55465	0.0358372	1	13.9608	13.6561	12.6437	12.85	0.0668645	-0.183666	0.299227	0.0486968	7	47489252	47489356	105	-
ENSSSCG00000001756	IREB2	7	47478706	47529242	E002	696.533	0.00507666	8.25207	0.0410795	1	32.0828	34.3746	32.6336	33.2806	-0.254223	-0.120063	-0.0620578	0.0721021	7	47479831	47482151	2321	-
ENSSSCG00000001765	ADAMTS7	7	47929033	47994453	E002	92.4616	0.00931155	8.60247	0.0350709	1	12.8968	14.7157	13.2814	13.2224	-0.399701	-0.324537	-0.0885863	-0.0134225	7	47931613	47931775	163	-
ENSSSCG00000001769	MORF4L1	7	48050045	48075795	E010	2057.55	0.000607224	7.89609	0.0482088	1	49.1664	48.5947	48.6736	48.4876	0.0528446	-0.00991532	0.0455372	-0.0172227	7	48070364	48070465	102	+
ENSSSCG00000001773	TMED3	7	48431375	48442645	E001	508.739	0.00244498	12.4503	0.00598948	0.865461	29.5882	28.6062	29.4711	28.8812	0.118337	0.0334056	0.0139658	-0.0709658	7	48431375	48431927	553	+
ENSSSCG00000001779	ZFAND6	7	48967579	49034703	E006	15.9252	0.0458559	13.7666	0.00324062	0.764246	4.96365	6.36678	4.33211	6.31081	-0.724402	-0.0257513	0.394908	1.09356	7	49020549	49020608	60	+
ENSSSCG00000001782	ABHD17C	7	49540879	49599319	E005	407.47	0.00927013	8.3862	0.0386693	1	25.2972	26.6715	27.3354	26.7376	-0.179056	0.00844097	-0.263214	-0.0757167	7	49597852	49599319	1468	+
ENSSSCG00000001786	CFAP161	7	49927305	49940707	E007	6.0972	0.0806403	10.7332	0.0132597	0.968437	3.65874	4.21463	2.72682	3.66581	-0.409793	-0.404207	0.850531	0.856117	7	49939736	49940707	972	+
ENSSSCG00000001787	IL16	7	49973938	50102346	E015	5.2827	0.222524	9.0264	0.0289419	1	3.62892	3.75206	3.47644	1.69343	-0.0966328	-2.29976	0.124276	-2.07886	7	50084805	50084870	66	+
ENSSSCG00000001788	STARD5	7	50107035	50118629	E006	21.0719	0.0287236	14.4823	0.00231708	0.726036	7.86034	6.42909	6.36978	5.7272	0.587762	-0.336829	0.614792	-0.309798	7	50118436	50118629	194	-
ENSSSCG00000001788	STARD5	7	50107035	50118629	E001	73.5964	0.00820603	8.28852	0.0404104	1	11.4015	12.6305	12.2212	12.2579	-0.306598	-0.0899126	-0.207694	0.0089915	7	50107035	50107656	622	-
ENSSSCG00000001792	EFL1	7	50839725	50977024	E014	44.3864	0.0114161	7.93251	0.0474273	1	9.77833	8.56241	9.63796	9.93301	0.391639	0.438084	0.0427594	0.0892041	7	50943635	50943711	77	-
ENSSSCG00000001792	EFL1	7	50839725	50977024	E012	54.6464	0.0168413	7.89361	0.0482624	1	11.4102	10.1209	10.5793	9.93233	0.35654	-0.0556923	0.225093	-0.187139	7	50941924	50942046	123	-
ENSSSCG00000001792	EFL1	7	50839725	50977024	E013	52.6531	0.0115589	10.4287	0.0152523	0.983177	10.9666	9.28352	10.3791	10.5179	0.493734	0.369509	0.163661	0.0394359	7	50942765	50942901	137	-
ENSSSCG00000001793	ADAMTSL3	7	51006366	51363620	E004	3.57793	0.220655	8.17206	0.0425865	1	2.98579	1.85368	1.82703	3.46834	1.37754	1.811	1.41937	1.85283	7	51016003	51016103	101	-
ENSSSCG00000001795	SH3GL3	7	51381097	51514225	E001	5.04571	0.327519	8.34058	0.0394731	1	1.77878	4.14699	3.63512	2.93954	-2.44772	-0.996218	-2.06607	-0.614574	7	51381097	51381748	652	-
ENSSSCG00000001795	SH3GL3	7	51381097	51514225	E013	1.88582	0.191959	8.66251	0.0341314	1	2.19012	2.77953	1.0951	1.65134	-0.688784	-1.50431	2.00128	1.18575	7	51514053	51514225	173	-
ENSSSCG00000001805	WHAMM	7	52108869	52140203	E010	38.337	0.0131268	10.6833	0.0135675	0.968875	9.61836	8.98936	8.30663	8.14385	0.199603	-0.29054	0.432018	-0.0581253	7	52140013	52140203	191	-
ENSSSCG00000001807	AP3B2	7	52256159	52294149	E030	1.89197	0.475782	9.18137	0.0269742	1	1.12256	1.49487	0.00863787	2.60199	-0.826814	1.60093	14.0443	16.472	7	52289127	52289187	61	+
ENSSSCG00000001810	PDE8A	7	52410779	52557645	E010	119.277	0.00644625	10.27	0.0164048	0.989432	15.8553	15.434	15.7173	14.2582	0.0827006	-0.241837	0.0268784	-0.297659	7	52445066	52445136	71	-
ENSSSCG00000001814	IQGAP1	7	52958106	53129958	E019	372.08	0.00455965	9.0376	0.0287952	1	26.1939	25.2009	25.9892	24.9102	0.1304	-0.0388649	0.02658	-0.142685	7	53084547	53084707	161	+
ENSSSCG00000001814	IQGAP1	7	52958106	53129958	E006	9.17463	0.181062	9.38887	0.0245435	1	3.11909	4.12661	4.38377	5.74715	-0.810454	0.961896	-0.98572	0.78663	7	52993054	52995737	2684	+
ENSSSCG00000001816	BLM	7	53317540	53412645	E020	55.9318	0.0126567	9.35384	0.0249382	1	9.6678	11.1278	10.6498	11.0172	-0.417381	-0.0297517	-0.28674	0.100889	7	53402096	53402288	193	+
ENSSSCG00000001817	FURIN	7	53460017	53472787	E004	525.263	0.00432462	9.21814	0.0265269	1	30.0759	28.8501	29.892	28.9855	0.146519	0.0163763	0.0217295	-0.108413	7	53463884	53464221	338	+
ENSSSCG00000001817	FURIN	7	53460017	53472787	E003	14.2347	0.0480091	11.5728	0.00899941	0.919103	6.24287	4.90186	5.94166	4.45967	0.70347	-0.274369	0.144092	-0.833747	7	53461560	53461647	88	+
ENSSSCG00000001819	MAN2A2	7	53498966	53519688	E002	58.8342	0.0258941	8.27031	0.0407434	1	11.5879	10.0728	11.8965	10.2419	0.416797	0.0493304	-0.0785839	-0.44605	7	53498975	53499147	173	+
ENSSSCG00000001821	UNC45A	7	53522474	53545960	E004	0.806364	0.408691	7.96408	0.0467598	1	1.81767	1.4953	1.14889	0.0125733	0.563725	-13.7887	1.32445	-13.028	7	53529905	53530115	211	+
ENSSSCG00000001821	UNC45A	7	53522474	53545960	E031	150.861	0.00480389	9.64148	0.0218729	1	16.2245	16.9437	18.077	17.0201	-0.134142	0.0139588	-0.335902	-0.187801	7	53545030	53545185	156	+
ENSSSCG00000001821	UNC45A	7	53522474	53545960	E020	102.006	0.00671996	11.7776	0.00818531	0.908484	14.6808	13.1164	14.9287	14.0974	0.341597	0.218247	-0.0510893	-0.17444	7	53537685	53537855	171	+
ENSSSCG00000001826	CFAP100	7	53921369	53949622	E003	3.36745	0.321186	9.83486	0.0200233	1	2.06623	3.66546	1.94248	2.5528	-1.65749	-1.04648	0.178385	0.789402	7	53923082	53923274	193	+
ENSSSCG00000001832	ACAN	7	54449816	54519194	E006	21.6528	0.0800025	11.4102	0.00970246	0.928784	8.39602	5.21894	6.57739	5.74392	1.38841	0.278754	0.71477	-0.394884	7	54484976	54484980	5	+
ENSSSCG00000001832	ACAN	7	54449816	54519194	E027	4541.15	0.012166	11.2476	0.0104597	0.933916	59.1258	62.2737	60.5873	62.4566	-0.273512	0.0157932	-0.127377	0.161928	7	54516114	54516272	159	+
ENSSSCG00000001832	ACAN	7	54449816	54519194	E018	127.592	0.124475	8.05838	0.0448204	1	16.685	16.973	12.5585	17.3113	-0.0530412	0.0613162	0.865437	0.979795	7	54500962	54501018	57	+
ENSSSCG00000001834	MFGE8	7	54539970	54571747	E008	736.427	0.00124092	7.90835	0.0479442	1	32.82	34.0673	33.8932	33.7931	-0.137813	-0.030038	-0.11875	-0.0109743	7	54540795	54540796	2	-
ENSSSCG00000001834	MFGE8	7	54539970	54571747	E017	583.486	0.00452705	9.00676	0.0292012	1	32.459	30.3904	30.3577	30.11	0.23734	-0.0329457	0.241172	-0.0291136	7	54554765	54554837	73	-
ENSSSCG00000001834	MFGE8	7	54539970	54571747	E006	756.403	0.00142604	7.87841	0.0485926	1	33.2258	34.527	34.2187	34.0542	-0.142693	-0.0514796	-0.109175	-0.0179614	7	54540786	54540789	4	-
ENSSSCG00000001834	MFGE8	7	54539970	54571747	E009	1405.01	0.00053831	12.3032	0.00641361	0.883791	41.8473	42.9611	43.0871	42.8099	-0.1089	-0.014709	-0.121146	-0.0269555	7	54540797	54540938	142	-
ENSSSCG00000001834	MFGE8	7	54539970	54571747	E016	883.601	0.00343153	13.196	0.00423132	0.80188	38.0291	35.361	36.0097	35.6231	0.279977	0.0279963	0.210887	-0.0410932	7	54551694	54551822	129	-
ENSSSCG00000001834	MFGE8	7	54539970	54571747	E015	1004.19	0.00336097	11.7443	0.0083123	0.910357	39.7761	36.9409	37.671	37.755	0.29075	0.0846117	0.214826	0.00868731	7	54551188	54551319	132	-
ENSSSCG00000001835	ABHD2	7	54655804	54770131	E009	67.6958	0.018127	10.5561	0.0143853	0.975492	11.2135	12.2373	10.0229	12.1084	-0.26123	-0.0317373	0.333493	0.562986	7	54764621	54764690	70	+
ENSSSCG00000001837	FANCI	7	54811027	54889998	E038	42.1537	0.0491311	11.063	0.0113903	0.946559	9.16743	10.1575	7.81187	9.35035	-0.30321	-0.244913	0.470473	0.52877	7	54888179	54888283	105	+
ENSSSCG00000001838	POLG	7	54889157	54906844	E002	211.62	0.0100502	9.28164	0.0257715	1	19.4267	20.2536	18.7046	21.2545	-0.132585	0.15472	0.119641	0.406946	7	54890155	54890315	161	-
ENSSSCG00000001849	ANPEP	7	55351087	55373881	E028	338.634	0.0038672	15.0549	0.00177033	0.710137	25.2133	24.129	23.4767	25.4075	0.146676	0.172455	0.237296	0.263075	7	55363636	55363790	155	-
ENSSSCG00000001849	ANPEP	7	55351087	55373881	E027	328.202	0.00149507	21.5268	8.18233e-05	0.305092	25.1874	23.5741	23.5083	24.9436	0.220203	0.187611	0.229409	0.196818	7	55363293	55363406	114	-
ENSSSCG00000001849	ANPEP	7	55351087	55373881	E026	316.249	0.00139827	9.68147	0.0214772	1	24.6121	23.3449	23.5726	24.41	0.175092	0.147636	0.143112	0.115656	7	55363052	55363195	144	-
ENSSSCG00000001849	ANPEP	7	55351087	55373881	E010	367.808	0.00153013	7.85124	0.0491884	1	25.2027	26.0631	26.0523	25.0478	-0.11318	-0.133858	-0.111777	-0.132455	7	55353811	55353921	111	-
ENSSSCG00000001849	ANPEP	7	55351087	55373881	E009	457.326	0.00130566	14.9555	0.00185507	0.710137	27.7713	28.9791	27.7003	27.5456	-0.148021	-0.176155	0.00882922	-0.0193043	7	55353516	55353683	168	-
ENSSSCG00000001852	IDH2	7	55651609	55675554	E002	25.7286	0.0360285	14.5069	0.00229037	0.724991	8.24635	7.86093	6.88163	6.01358	0.140481	-0.782737	0.52989	-0.393327	7	55653589	55654302	714	-
ENSSSCG00000001865	SCAPER	7	56583160	57011914	E004	1.54139	0.236317	9.93751	0.0191049	1	2.15974	0.599849	2.4961	1.58925	3.69802	2.81217	-0.418228	-1.30408	7	56586714	56589325	2612	-
ENSSSCG00000001866	RCN2	7	57041003	57059330	E001	258.962	0.00342731	9.49042	0.0234335	1	22.287	21.7698	22.5518	21.0158	0.0762486	-0.113768	-0.0385057	-0.228522	7	57041003	57041076	74	+
ENSSSCG00000001871	HMG20A	7	57504465	57570023	E016	788.788	0.00658801	12.0074	0.00735802	0.898743	33.9673	36.2861	33.6601	35.127	-0.249162	-0.123403	0.0337193	0.159478	7	57567602	57570021	2420	+
ENSSSCG00000001871	HMG20A	7	57504465	57570023	E012	128.705	0.00252113	9.35453	0.0249303	1	15.9065	15.3809	16.3661	15.88	0.103155	0.098034	-0.0877988	-0.0929196	7	57562864	57563079	216	+
ENSSSCG00000001871	HMG20A	7	57504465	57570023	E011	64.7155	0.00604466	12.4581	0.00596788	0.86344	11.5033	10.8553	12.3447	11.1803	0.172798	0.0878335	-0.211317	-0.296282	7	57561873	57561948	76	+
ENSSSCG00000001873	CSPG4	7	57949455	57988335	E010	1401.3	0.0280241	8.2857	0.0404617	1	41.3249	43.341	41.9849	43.9707	-0.197294	0.0608024	-0.065049	0.193048	7	57985583	57988335	2753	+
ENSSSCG00000001877	SNUPN	7	58038995	58071243	E002	33.9504	0.0180342	8.09766	0.0440359	1	7.79425	9.41557	8.33328	7.87126	-0.555912	-0.527084	-0.196264	-0.167436	7	58039015	58039052	38	+
ENSSSCG00000001878	PTPN9	7	58078389	58164405	E004	74.9412	0.00552297	8.53048	0.0362308	1	13.0543	12.0639	11.585	12.2642	0.237097	0.0493634	0.358278	0.170544	7	58117054	58117178	125	+
ENSSSCG00000001878	PTPN9	7	58078389	58164405	E013	415.968	0.0029595	8.71022	0.0334024	1	26.2856	27.6524	26.4243	26.9091	-0.173449	-0.0935629	-0.0178906	0.0619956	7	58161668	58163196	1529	+
ENSSSCG00000001878	PTPN9	7	58078389	58164405	E006	73.6859	0.00637433	9.91928	0.0192649	1	12.5329	11.7658	12.9959	11.5029	0.189311	-0.0675257	-0.109157	-0.365993	7	58137959	58138069	111	+
ENSSSCG00000001880	SIN3A	7	58176167	58245971	E029	595.012	0.00452736	8.31344	0.0399592	1	30.177	31.5889	30.4431	31.7888	-0.163743	0.0228039	-0.0312239	0.155323	7	58244683	58245758	1076	+
ENSSSCG00000001880	SIN3A	7	58176167	58245971	E023	143.681	0.00307697	9.62376	0.0220505	1	16.3297	16.2879	16.3779	17.6298	0.00791488	0.245603	-0.00910894	0.228579	7	58225919	58226088	170	+
ENSSSCG00000001880	SIN3A	7	58176167	58245971	E017	73.4337	0.0108224	8.20797	0.0419036	1	12.6166	12.5851	11.5915	11.1955	0.00751597	-0.350161	0.253934	-0.103743	7	58215256	58215374	119	+
ENSSSCG00000001882	NEIL1	7	58261769	58268522	E010	5.86938	0.0862872	11.4659	0.00945595	0.925506	4.65281	3.47772	3.06796	2.65015	0.843571	-0.786078	1.20632	-0.423327	7	58268353	58268522	170	-
ENSSSCG00000001884	COMMD4	7	58276957	58283114	E015	7.62389	0.0738696	10.6565	0.0137361	0.968875	4.58105	4.64022	3.21685	3.24349	-0.0372385	-1.03751	1.02413	0.0238614	7	58279100	58279141	42	-
ENSSSCG00000001885	C15orf39	7	58381034	58386366	E001	12.3124	0.100713	10.7002	0.0134628	0.968875	4.8982	5.99174	5.19527	3.39631	-0.585995	-1.64732	-0.171041	-1.23237	7	58381034	58381035	2	-
ENSSSCG00000001887	SCAMP5	7	58550198	58559310	E021	1.06933	0.389822	12.6763	0.00539147	0.843232	0.594308	2.2315	0.0178117	1.77735	-3.81924	-0.657269	10.1208	13.2827	7	58558530	58558625	96	-
ENSSSCG00000001892	SCAMP2	7	58672664	58699142	E010	0.714441	0.520656	10.2038	0.0169109	0.992103	1.96254	0.0171438	1.55967	0.0181328	13.6793	0.161828	0.663496	-12.8539	7	58687606	58687734	129	+
ENSSSCG00000001892	SCAMP2	7	58672664	58699142	E018	11.3873	0.0349039	8.22495	0.0415844	1	4.7034	4.98574	5.69111	4.00316	-0.16925	-0.636717	-0.553931	-1.0214	7	58699137	58699137	1	+
ENSSSCG00000001892	SCAMP2	7	58672664	58699142	E019	10.5783	0.0341409	9.02109	0.0290118	1	4.49182	4.67359	5.62329	3.87374	-0.115098	-0.544222	-0.652601	-1.08172	7	58699138	58699139	2	+
ENSSSCG00000001900	CSK	7	58736531	58755260	E022	33.2687	0.0101914	11.1668	0.0108574	0.943302	9.3009	7.74517	7.92074	7.96894	0.538258	0.083522	0.472531	0.0177955	7	58755256	58755260	5	-
ENSSSCG00000001900	CSK	7	58736531	58755260	E021	61.8937	0.00756634	8.48404	0.0369988	1	12.0301	11.0588	11.1038	10.4609	0.251429	-0.165284	0.239349	-0.177364	7	58755236	58755255	20	-
ENSSSCG00000001907	UBL7	7	59070728	59084112	E009	300.294	0.00385927	8.34652	0.0393676	1	22.2639	23.667	23.3342	23.4571	-0.20033	-0.0293704	-0.153656	0.0173033	7	59079971	59080138	168	+
ENSSSCG00000001907	UBL7	7	59070728	59084112	E008	212.54	0.00197546	8.37579	0.0388513	1	19.1564	20.1391	19.8034	20.2615	-0.158823	0.0193393	-0.105307	0.0728552	7	59079679	59079728	50	+
ENSSSCG00000001910	ISLR	7	59349675	59352839	E002	1056.18	0.0116032	11.6028	0.00887527	0.917855	37.8633	37.9943	38.3064	38.2274	-0.0135063	0.023977	-0.0455912	-0.00810792	7	59349680	59351686	2007	-
ENSSSCG00000001913	STOML1	7	59452176	59461206	E005	25.3761	0.032048	9.11478	0.0278031	1	8.29192	6.54863	6.88898	6.98959	0.690898	0.19031	0.542957	0.0423685	7	59455367	59455516	150	+
ENSSSCG00000001913	STOML1	7	59452176	59461206	E012	34.9997	0.0320775	8.92913	0.0302481	1	7.474	9.28667	8.92422	8.23153	-0.638146	-0.355047	-0.520761	-0.237662	7	59460284	59460471	188	+
ENSSSCG00000001913	STOML1	7	59452176	59461206	E013	59.7439	0.0230295	9.91284	0.0193217	1	9.82293	11.6217	11.4655	11.1098	-0.499859	-0.134396	-0.459444	-0.0939808	7	59460472	59461197	726	+
ENSSSCG00000001918	NPTN	7	59714080	59840591	E004	365.15	0.0104164	8.99485	0.0293594	1	25.3952	23.7736	26.5061	26.0165	0.219971	0.301537	-0.144856	-0.0632893	7	59768811	59768906	96	+
ENSSSCG00000001918	NPTN	7	59714080	59840591	E010	924.146	0.000761493	9.83421	0.0200293	1	36.5256	37.502	36.6367	36.6344	-0.10196	-0.0905261	-0.0116675	-0.00023323	7	59828990	59829263	274	+
ENSSSCG00000001918	NPTN	7	59714080	59840591	E003	181.697	0.0176099	11.0657	0.0113758	0.94616	18.5044	16.8204	20.0443	19.225	0.297725	0.418167	-0.252918	-0.132475	7	59768665	59768810	146	+
ENSSSCG00000001918	NPTN	7	59714080	59840591	E006	6.72423	0.20872	9.23527	0.026321	1	3.83956	4.70451	3.71775	2.20885	-0.58903	-2.1881	0.0933726	-1.5057	7	59804978	59805325	348	+
ENSSSCG00000001921	NEO1	7	60064994	60300562	E030	122.7	0.00768597	14.6203	0.00217158	0.722386	16.4879	15.2393	16.2707	14.5835	0.242174	-0.134331	0.0409324	-0.335573	7	60224566	60224883	318	-
ENSSSCG00000001921	NEO1	7	60064994	60300562	E013	115.033	0.00624805	8.39826	0.0384594	1	14.8688	15.8644	15.2914	14.5035	-0.198594	-0.274419	-0.085685	-0.16151	7	60094899	60095037	139	-
ENSSSCG00000001921	NEO1	7	60064994	60300562	E006	158.909	0.00909407	8.40037	0.0384228	1	16.3148	18.115	17.4932	18.092	-0.325346	-0.00396469	-0.216245	0.105137	7	60079176	60079268	93	-
ENSSSCG00000001921	NEO1	7	60064994	60300562	E004	211.12	0.00687711	11.4126	0.00969153	0.928721	18.7482	20.2773	19.9447	20.8184	-0.24862	0.0843162	-0.195889	0.137048	7	60070895	60071158	264	-
ENSSSCG00000001921	NEO1	7	60064994	60300562	E005	195.14	0.00996789	11.1232	0.0110781	0.945505	17.8829	19.8791	19.03	20.0463	-0.33367	0.0266658	-0.195315	0.165021	7	60075044	60075202	159	-
ENSSSCG00000001925	ADPGK	7	60584051	60623929	E007	265.791	0.00579613	8.70166	0.0335321	1	22.0135	21.1988	22.9254	22.3677	0.121971	0.173884	-0.132388	-0.0804753	7	60620118	60620216	99	+
ENSSSCG00000001927	HEXA	7	60878284	60913339	E003	861.102	0.00325769	10.5949	0.0141305	0.973906	37.0927	35.3608	35.9059	35.3711	0.18296	0.00110471	0.124859	-0.0569959	7	60878489	60878783	295	+
ENSSSCG00000001930	PKM	7	61013723	61032777	E015	3775.17	0.00182306	8.94178	0.030075	1	58.591	59.2644	57.6923	57.6704	-0.0589082	-0.139711	0.0788772	-0.00192533	7	61028931	61031290	2360	+
ENSSSCG00000001942	PAX9	7	63324711	63346310	E004	2.69339	0.837514	8.23342	0.0414261	1	0.548477	2.4853	3.03467	2.75609	-4.36209	0.298944	-4.93949	-0.278456	7	63340378	63341001	624	-
ENSSSCG00000001955	SRP54	7	64829228	64877195	E014	88.0849	0.0038254	10.437	0.0151945	0.981223	13.9127	12.7376	12.6067	13.5211	0.266478	0.180024	0.297552	0.211097	7	64861144	64861148	5	-
ENSSSCG00000001955	SRP54	7	64829228	64877195	E001	382.255	0.0091227	10.5204	0.0146232	0.9769	24.4252	27.0685	25.5031	26.2176	-0.346839	-0.108887	-0.144565	0.0933872	7	64829228	64830141	914	-
ENSSSCG00000001955	SRP54	7	64829228	64877195	E012	182.053	0.00442357	8.90118	0.030634	1	19.2961	17.8025	18.5459	18.8837	0.253297	0.185043	0.125092	0.0568387	7	64855746	64855850	105	-
ENSSSCG00000001955	SRP54	7	64829228	64877195	E015	142.873	0.00615141	9.9105	0.0193425	1	17.6146	16.417	15.7938	16.5327	0.218518	0.0216913	0.337775	0.140949	7	64861149	64861235	87	-
ENSSSCG00000001955	SRP54	7	64829228	64877195	E013	141.464	0.00287687	11.2125	0.0106307	0.938122	17.1772	15.7772	16.3575	16.8562	0.262717	0.204157	0.15146	0.0929007	7	64860056	64860140	85	-
ENSSSCG00000001958	BAZ1A	7	64969640	65069889	E025	579.418	0.00458122	9.13909	0.0274976	1	31.173	29.8371	29.5015	30.0557	0.156129	0.0258506	0.196065	0.0657864	7	65063099	65063568	470	+
ENSSSCG00000001959	CFL2	7	65090276	65094512	E005	670.515	0.00354262	9.43654	0.0240161	1	31.7125	32.6457	32.8326	32.8923	-0.105504	0.027568	-0.12641	0.00666267	7	65092003	65094043	2041	+
ENSSSCG00000001964	NPAS3	7	65928075	66800991	E006	1.09094	0.31212	8.82371	0.031729	1	1.36355	1.40717	2.38321	0.670309	-0.0909171	-2.14039	-1.61254	-3.66201	7	65954870	65955063	194	-
ENSSSCG00000001964	NPAS3	7	65928075	66800991	E012	2.46504	0.16192	7.90297	0.0480603	1	2.02829	1.22244	2.18849	2.616	1.46201	2.19725	-0.219607	0.515638	7	66377311	66377387	77	-
ENSSSCG00000001964	NPAS3	7	65928075	66800991	E005	1.10562	0.313782	8.70671	0.0334555	1	1.49324	0.0168128	2.39317	1.06537	12.9463	11.9717	-1.36228	-2.33688	7	65950201	65950307	107	-
ENSSSCG00000001966	ARHGAP5	7	67494941	67594197	E009	24.3973	0.0192194	12.6055	0.00557237	0.851655	7.10975	7.36826	8.03171	6.1231	-0.104477	-0.540538	-0.357144	-0.793205	7	67594033	67594160	128	-
ENSSSCG00000001970	HEATR5A	7	68211624	68259794	E017	115.605	0.0112695	7.84827	0.0492537	1	14.1825	15.483	14.7047	15.9197	-0.26773	0.0854365	-0.110029	0.243138	7	68247497	68247769	273	+
ENSSSCG00000001970	HEATR5A	7	68211624	68259794	E009	65.4596	0.00711138	9.84614	0.0199203	1	12.3607	11.0074	11.2126	11.5585	0.346588	0.145685	0.29158	0.0906765	7	68232475	68232714	240	+
ENSSSCG00000001970	HEATR5A	7	68211624	68259794	E002	46.432	0.0202365	8.18841	0.0422741	1	10.2023	9.38981	10.4766	9.00282	0.245513	-0.124148	-0.0787048	-0.448366	7	68212451	68212641	191	+
ENSSSCG00000001972	AP4S1	7	68393285	68471722	E003	112.847	0.0133072	10.1932	0.0169929	0.992103	15.9369	15.0884	14.5921	14.0211	0.167819	-0.223438	0.269906	-0.121352	7	68420289	68425159	4871	-
ENSSSCG00000001972	AP4S1	7	68393285	68471722	E010	18.3617	0.0199697	11.532	0.00917105	0.921047	5.43126	5.75532	6.67266	6.77426	-0.168603	0.475212	-0.599689	0.0441261	7	68442153	68442221	69	-
ENSSSCG00000001974	G2E3	7	68852777	68916992	E003	47.598	0.00559895	9.2717	0.0258883	1	9.49696	10.5867	9.01589	9.72924	-0.321762	-0.250338	0.153385	0.224809	7	68857849	68858039	191	-
ENSSSCG00000001974	G2E3	7	68852777	68916992	E007	73.1804	0.00506535	12.538	0.00575022	0.857765	12.1334	11.7701	13.0501	11.3373	0.090996	-0.111896	-0.218926	-0.421818	7	68873952	68874081	130	-
ENSSSCG00000001974	G2E3	7	68852777	68916992	E006	78.2188	0.00498932	8.59752	0.0351496	1	12.6358	11.6736	12.3988	13.0795	0.237427	0.341321	0.0568883	0.160782	7	68872755	68873062	308	-
ENSSSCG00000001974	G2E3	7	68852777	68916992	E004	44.402	0.0143426	10.3528	0.0157933	0.987438	9.15493	9.6422	8.32403	10.3844	-0.153116	0.219614	0.28007	0.6528	7	68865603	68865775	173	-
ENSSSCG00000001974	G2E3	7	68852777	68916992	E005	57.0063	0.0151592	14.3772	0.00243416	0.736357	10.6734	10.0376	9.75018	12.1217	0.182219	0.561917	0.268215	0.647912	7	68870354	68870535	182	-
ENSSSCG00000001974	G2E3	7	68852777	68916992	E008	83.7687	0.00612556	11.848	0.00792243	0.908484	12.7199	12.9072	13.9018	12.0164	-0.0439902	-0.21475	-0.268294	-0.439054	7	68874187	68874311	125	-
ENSSSCG00000001975	PRKD1	7	69527811	69872863	E007	9.43806	0.0627299	9.79455	0.0203957	1	3.75308	5.39445	4.0868	4.18949	-1.05254	-0.733819	-0.246791	0.0719328	7	69805979	69806056	78	+
ENSSSCG00000001988	ADCY4	7	74956220	74972196	E001	14.506	0.0305231	9.50065	0.0233244	1	6.04304	4.83267	6.25408	5.07072	0.649936	0.139639	-0.100038	-0.610336	7	74956220	74956326	107	+
ENSSSCG00000001990	NOP9	7	74985753	74992946	E009	165.842	0.00726472	8.19861	0.0420805	1	17.5935	17.7591	18.9879	17.2219	-0.0292435	-0.0957093	-0.239259	-0.305725	7	74991076	74991531	456	-
ENSSSCG00000001991	DHRS1	7	74992115	75002148	E004	219.032	0.00307385	8.14521	0.0431041	1	20.0425	19.4581	20.6616	20.669	0.0940418	0.192411	-0.0972217	0.00114797	7	74996059	74996138	80	+
ENSSSCG00000001992	RABGGTA	7	75021755	75028875	E007	74.712	0.00998487	8.16082	0.0428023	1	12.09	11.577	13.2723	12.1605	0.129727	0.147164	-0.280584	-0.263147	7	75023127	75023314	188	+
ENSSSCG00000001993	TGM1	7	75029923	75047300	E017	2.03568	0.397575	7.84929	0.0492314	1	0.938515	1.82171	1.33664	3.2832	-1.91462	1.70247	-1.02068	2.59641	7	75045909	75047300	1392	+
ENSSSCG00000001993	TGM1	7	75029923	75047300	E003	8.34843	0.0856329	9.25201	0.0261214	1	4.14768	3.95167	3.70489	2.37365	0.140291	-1.47454	0.327082	-1.28774	7	75031047	75031370	324	+
ENSSSCG00000002000	IPO4	7	75110082	75118733	E029	103.626	0.0117054	8.42382	0.0380185	1	13.8491	14.9437	13.2802	14.8168	-0.231421	-0.0260328	0.12688	0.332268	7	75118412	75118733	322	+
ENSSSCG00000002000	IPO4	7	75110082	75118733	E026	86.2765	0.00718295	9.1604	0.0272325	1	13.3453	13.9394	12.3864	12.4947	-0.131822	-0.330204	0.224504	0.0261223	7	75117120	75117252	133	+
ENSSSCG00000002000	IPO4	7	75110082	75118733	E009	73.6058	0.01089	8.61782	0.0348284	1	11.8005	12.2871	13.3227	11.4306	-0.121047	-0.216204	-0.364578	-0.459735	7	75112723	75112887	165	+
ENSSSCG00000002001	REC8	7	75118744	75125537	E001	22.3133	0.0630623	8.60099	0.0350944	1	6.32113	6.82912	6.17231	5.15891	-0.225589	-0.816917	0.0694512	-0.521877	7	75118744	75118963	220	-
ENSSSCG00000002007	FITM1	7	75166912	75168245	E001	14.4418	0.182331	8.1692	0.0426413	1	5.30017	5.27918	4.73867	4.42623	0.0115362	-0.511633	0.325268	-0.197901	7	75166912	75167595	684	-
ENSSSCG00000002008	DCAF11	7	75168992	75180953	E001	135.543	0.00976061	10.4971	0.0147807	0.977731	14.9477	16.7592	17.0513	15.7672	-0.351756	-0.188242	-0.405338	-0.241824	7	75168992	75169722	731	-
ENSSSCG00000002009	PCK2	7	75187197	75197733	E002	1.52	0.181282	12.6397	0.00548432	0.849773	1.16428	0.853537	1.92622	2.56593	0.89607	3.17815	-1.45357	0.82851	7	75187199	75187202	4	-
ENSSSCG00000002013	DHRS4	7	75242124	75255598	E002	37.3363	0.0279212	8.74917	0.0328185	1	8.37525	9.42074	9.41462	7.43139	-0.346508	-0.6972	-0.344588	-0.69528	7	75242127	75242172	46	-
ENSSSCG00000002013	DHRS4	7	75242124	75255598	E002	37.3363	0.0279212	8.74917	0.0328185	1	8.37525	9.42074	9.41462	7.43139	-0.346508	-0.6972	-0.344588	-0.69528	7	75242127	75242172	46	-
ENSSSCG00000002020	ENSSSCG00000002020	7	75618988	75629447	E006	158.435	0.00366727	9.19122	0.0268536	1	16.8954	17.7657	18.3501	16.9602	-0.15629	-0.144412	-0.257624	-0.245745	7	75622159	75622315	157	-
ENSSSCG00000002020	ENSSSCG00000002020	7	75618988	75629447	E010	74.6275	0.00721543	9.67903	0.0215011	1	12.4597	11.8212	11.2478	12.8084	0.157674	0.240666	0.306169	0.389162	7	75624200	75624284	85	-
ENSSSCG00000002026	EFS	7	75722183	75731610	E009	218.515	0.0082553	8.61803	0.034825	1	19.264	21.1124	19.9494	20.7736	-0.292328	-0.0519853	-0.110969	0.129373	7	75730362	75731610	1249	+
ENSSSCG00000002026	EFS	7	75722183	75731610	E004	54.3155	0.00525447	8.24334	0.0412415	1	10.9343	9.81508	10.8089	10.8107	0.320424	0.286605	0.0343179	0.000498384	7	75727140	75727280	141	+
ENSSSCG00000002032	SLC7A8	7	75854882	75921931	E024	212.128	0.00465754	7.82413	0.0497898	1	19.6173	20.3298	20.8887	19.2764	-0.113607	-0.169166	-0.200486	-0.256045	7	75919399	75920591	1193	+
ENSSSCG00000002032	SLC7A8	7	75854882	75921931	E014	26.1783	0.0140975	9.28086	0.0257806	1	7.39412	7.66469	6.24588	7.82633	-0.105256	0.0611723	0.492925	0.659353	7	75910601	75910602	2	+
ENSSSCG00000002032	SLC7A8	7	75854882	75921931	E012	43.0369	0.00920709	8.75512	0.0327303	1	9.22594	8.38663	10.0125	9.9207	0.280844	0.495402	-0.241828	-0.02727	7	75907902	75908025	124	+
ENSSSCG00000002032	SLC7A8	7	75854882	75921931	E023	44.9533	0.0169751	8.32004	0.0398404	1	9.4862	10.2363	10.125	8.52405	-0.22521	-0.540396	-0.19282	-0.508006	7	75919314	75919398	85	+
ENSSSCG00000002032	SLC7A8	7	75854882	75921931	E015	27.3856	0.0103066	11.7036	0.00847082	0.913257	7.45123	7.79962	6.39143	8.1349	-0.133877	0.123477	0.448283	0.705638	7	75910603	75910611	9	+
ENSSSCG00000002050	DAD1	7	76432051	76457192	E004	4.81283	0.261773	9.77694	0.0205606	1	2.97599	4.24181	3.26746	1.64352	-1.02611	-2.74163	-0.270293	-1.98581	7	76448904	76450871	1968	+
ENSSSCG00000002051	ABHD4	7	76396484	76431809	E017	30.0099	0.00931216	11.1279	0.0110542	0.945505	8.24965	6.82021	8.19925	7.9665	0.557255	0.45473	0.0180004	-0.0845247	7	76416277	76416365	89	-
ENSSSCG00000002127	CHD8	7	77719582	77780146	E005	102.737	0.0236147	11.4594	0.00948417	0.926043	14.6997	13.5155	15.6238	13.3133	0.254994	-0.0455528	-0.186513	-0.48706	7	77740537	77741418	882	+
ENSSSCG00000002127	CHD8	7	77719582	77780146	E010	40.3413	0.0112186	8.07488	0.0444892	1	9.0011	9.46875	9.65852	8.33618	-0.149434	-0.375259	-0.208073	-0.433898	7	77749564	77749632	69	+
ENSSSCG00000002127	CHD8	7	77719582	77780146	E001	10.0128	0.0266749	9.71993	0.0211032	1	4.88462	5.11886	3.50092	4.49236	-0.136045	-0.379	0.965464	0.722509	7	77719582	77719634	53	+
ENSSSCG00000002142	TEP1	7	78491053	78530183	E025	38.0332	0.0301799	9.00951	0.0291647	1	9.1337	8.11308	10.1201	7.97864	0.34861	-0.0490394	-0.303142	-0.700792	7	78513841	78514035	195	+
ENSSSCG00000002142	TEP1	7	78491053	78530183	E026	25.8619	0.0501914	10.4856	0.0148591	0.978542	6.91526	6.32123	8.88124	7.02575	0.262159	0.308486	-0.733804	-0.687476	7	78514176	78514351	176	+
ENSSSCG00000002142	TEP1	7	78491053	78530183	E048	44.3279	0.0104563	8.76274	0.0326175	1	9.16992	10.0095	8.63317	10.0367	-0.258915	0.008037	0.177679	0.444632	7	78525115	78525247	133	+
ENSSSCG00000002142	TEP1	7	78491053	78530183	E031	29.3042	0.0115422	8.17428	0.0425439	1	7.28955	8.4666	8.15113	7.20618	-0.43898	-0.472635	-0.327417	-0.361071	7	78515993	78516143	151	+
ENSSSCG00000002142	TEP1	7	78491053	78530183	E046	48.58	0.0115167	8.01322	0.0457392	1	9.65791	10.6436	9.06094	10.1825	-0.288011	-0.131417	0.188358	0.344952	7	78524723	78524855	133	+
ENSSSCG00000002142	TEP1	7	78491053	78530183	E042	46.8627	0.0118549	8.68961	0.0337154	1	10.0982	8.77105	9.74013	10.3	0.416084	0.474761	0.106867	0.165543	7	78521254	78521466	213	+
ENSSSCG00000002142	TEP1	7	78491053	78530183	E032	28.3232	0.0211683	9.33191	0.0251884	1	7.42686	8.82742	6.95504	7.18883	-0.50716	-0.602478	0.191977	0.0966582	7	78516388	78516521	134	+
ENSSSCG00000002143	PARP2	7	78535076	78551375	E007	104.946	0.00435223	9.30912	0.0254511	1	14.6761	13.6087	13.9028	14.8535	0.229307	0.265957	0.164547	0.201197	7	78537401	78537464	64	-
ENSSSCG00000002243	SLC12A6	7	80164911	80268323	E003	63.1927	0.0051972	16.234	0.00101536	0.630785	10.83	11.5643	11.7222	9.79315	-0.195524	-0.494044	-0.236076	-0.534596	7	80165502	80165747	246	+
ENSSSCG00000002243	SLC12A6	7	80164911	80268323	E005	53.2058	0.0309966	7.90901	0.0479301	1	10.0929	10.162	11.2455	9.25648	-0.0202086	-0.275981	-0.321383	-0.577155	7	80165790	80166026	237	+
ENSSSCG00000002243	SLC12A6	7	80164911	80268323	E021	67.1251	0.0105517	7.81599	0.0499718	1	11.4827	10.9786	10.8899	12.6397	0.133827	0.421445	0.157968	0.445585	7	80250621	80250795	175	+
ENSSSCG00000002252	ARRDC4	7	81656755	81669536	E004	173.05	0.00834822	7.87349	0.0487	1	18.5383	17.1941	18.8143	18.1161	0.235262	0.162981	-0.0465285	-0.118809	7	81661322	81661515	194	-
ENSSSCG00000002257	MCTP2	7	84723932	84962666	E016	10.4892	0.0557987	8.06037	0.0447804	1	4.54795	4.97048	4.07149	3.20552	-0.257875	-1.27117	0.320884	-0.692413	7	84827618	84827720	103	-
ENSSSCG00000002257	MCTP2	7	84723932	84962666	E015	10.3285	0.0504708	11.9475	0.00756512	0.898743	4.65257	4.85465	4.09692	2.77306	-0.123412	-1.62185	0.368834	-1.1296	7	84826121	84826214	94	-
ENSSSCG00000002259	ENSSSCG00000002259	7	88105580	88219075	E008	68.9781	0.0111972	8.04438	0.0451033	1	11.6768	12.5422	11.3153	10.6722	-0.214248	-0.482368	0.0938895	-0.174231	7	88163866	88163908	43	+
ENSSSCG00000002263	SLCO3A1	7	86777920	87103309	E003	45.9443	0.0162386	9.14321	0.0274462	1	9.24297	10.1385	8.84334	10.3242	-0.273434	0.0538255	0.130286	0.457545	7	86801296	86801360	65	-
ENSSSCG00000002266	CHD2	7	85983837	86106938	E032	3.73429	0.227098	16.3339	0.000968526	0.625866	1.36363	2.34789	3.49297	3.85477	-1.56922	1.43413	-2.71796	0.285395	7	86064958	86064995	38	-
ENSSSCG00000002266	CHD2	7	85983837	86106938	E028	6.99045	0.222155	12.1596	0.00685581	0.894728	2.09761	4.65526	3.28475	4.17542	-2.30683	-0.315504	-1.29652	0.694811	7	86057891	86058231	341	-
ENSSSCG00000002266	CHD2	7	85983837	86106938	E011	131.382	0.0148842	7.82339	0.0498063	1	15.2713	15.9408	14.8135	16.8428	-0.131699	0.169962	0.0930342	0.394695	7	86011904	86012026	123	-
ENSSSCG00000002269	MTHFD1	7	88471414	88537387	E025	239.864	0.00616767	8.00316	0.0459465	1	20.6049	21.1831	20.2812	22.1226	-0.0889005	0.140414	0.0506459	0.279961	7	88523182	88523282	101	+
ENSSSCG00000002277	SPTB	7	88812718	88954306	E039	61.0228	0.0142099	11.6771	0.00857506	0.913257	11.0665	10.2129	9.97967	8.87587	0.23852	-0.41459	0.306974	-0.346136	7	88954260	88954306	47	-
ENSSSCG00000002277	SPTB	7	88812718	88954306	E010	339.902	0.00778616	9.54191	0.0228897	1	22.6484	23.0409	23.3912	25.3963	-0.0562539	0.323211	-0.105847	0.273618	7	88831660	88831798	139	-
ENSSSCG00000002281	FNTB	7	89052507	89131072	E014	351.055	0.00554749	8.82078	0.031771	1	25.4631	25.6323	24.026	24.4932	-0.0223208	-0.152326	0.193993	0.0639875	7	89129592	89131072	1481	+
ENSSSCG00000002285	GPHN	7	90346714	90916455	E017	1.88299	0.416115	7.83318	0.0495882	1	1.27866	3.03614	1.1099	1.91207	-2.49812	-1.33633	0.408554	1.57034	7	90716133	90716189	57	+
ENSSSCG00000002285	GPHN	7	90346714	90916455	E033	30.7936	0.0201278	8.99867	0.0293086	1	8.67501	8.48043	7.60172	7.14331	0.0667292	-0.50306	0.387743	-0.182047	7	90900235	90900299	65	+
ENSSSCG00000002285	GPHN	7	90346714	90916455	E024	43.7587	0.0108802	7.87769	0.0486082	1	9.01148	8.87258	10.3526	9.57496	0.045769	0.224762	-0.410205	-0.231212	7	90794330	90794467	138	+
ENSSSCG00000002290	PLEK2	7	91109455	91132843	E007	50.4891	0.0215448	7.83976	0.0494421	1	10.0761	10.2517	10.7742	8.89707	-0.0512066	-0.418812	-0.198826	-0.566431	7	91115505	91115606	102	-
ENSSSCG00000002292	PLEKHH1	7	91247872	91306992	E012	2.59895	0.330116	8.52396	0.0363377	1	2.6725	2.6014	2.21412	0.656933	0.0779462	-3.97336	0.54377	-3.50754	7	91286967	91287109	143	+
ENSSSCG00000002292	PLEKHH1	7	91247872	91306992	E005	3.61273	0.190994	8.02634	0.0454705	1	2.88021	1.50669	2.52499	3.50496	1.87189	2.43987	0.380519	0.948499	7	91278234	91278317	84	+
ENSSSCG00000002295	VTI1B	7	91374640	91413607	E006	196.661	0.00314687	10.6086	0.0140417	0.972595	18.8733	19.3435	19.1236	19.6669	-0.0777567	0.0525739	-0.0415896	0.088741	7	91397777	91397835	59	-
ENSSSCG00000002296	RDH11	7	91415042	91452405	E007	0.81481	0.386553	10.2297	0.0167115	0.992103	0.818451	2.14079	1.35061	0.0206881	-2.77585	-13.3881	-1.44573	-12.058	7	91442081	91442168	88	-
ENSSSCG00000002298	ZFYVE26	7	91518452	91590449	E046	34.1713	0.0177271	12.4928	0.00587225	0.860256	8.63448	8.49825	9.12697	7.37123	0.0467773	-0.417344	-0.163386	-0.627507	7	91573432	91574043	612	-
ENSSSCG00000002298	ZFYVE26	7	91518452	91590449	E045	12.9947	0.028935	16.1494	0.00105673	0.640574	4.94151	5.78268	5.9221	4.12107	-0.457019	-0.983726	-0.526388	-1.0531	7	91572644	91572726	83	-
ENSSSCG00000002306	GALNT16	7	92929069	93041442	E010	5.2941	0.0793686	9.06409	0.0284508	1	4.08892	2.51255	3.49629	3.41754	1.40912	0.889668	0.453509	-0.0659392	7	93018199	93018302	104	+
ENSSSCG00000002307	ERH	7	93068253	93083980	E005	9.87529	0.0313548	8.42692	0.0379653	1	4.38654	4.77241	5.21588	3.75035	-0.24462	-0.698713	-0.502701	-0.956795	7	93081746	93081759	14	-
ENSSSCG00000002315	SLC8A3	7	93643618	93796917	E002	1229.59	0.00898569	7.87454	0.048677	1	39.9695	41.4018	40.3835	41.4552	-0.142708	0.00528073	-0.0414881	0.106501	7	93643619	93645726	2108	-
ENSSSCG00000002315	SLC8A3	7	93643618	93796917	E012	41.223	0.0308385	9.95019	0.0189943	1	10.1047	9.8299	7.73548	9.20929	0.0816319	-0.192672	0.787026	0.512722	7	93796343	93796917	575	-
ENSSSCG00000002330	PCNX1	7	94445270	94614213	E024	30.25	0.0410767	8.40942	0.0382664	1	8.11076	8.00092	6.35484	8.36627	0.0400193	0.131119	0.713658	0.804757	7	94577592	94577700	109	+
ENSSSCG00000002330	PCNX1	7	94445270	94614213	E001	16.0053	0.0671508	10.242	0.0166175	0.992103	6.01512	5.20242	6.94392	4.99907	0.422304	-0.11584	-0.418908	-0.957052	7	94445270	94445350	81	+
ENSSSCG00000002330	PCNX1	7	94445270	94614213	E002	34.1695	0.0237917	7.91124	0.0478821	1	8.73547	8.20877	9.01266	7.2925	0.182843	-0.346924	-0.0920108	-0.621777	7	94445351	94445536	186	+
ENSSSCG00000002330	PCNX1	7	94445270	94614213	E036	95.3417	0.016298	13.6436	0.00343273	0.764246	12.1514	14.5579	13.5355	14.0358	-0.545723	-0.111041	-0.324745	0.109937	7	94612658	94612798	141	+
ENSSSCG00000002330	PCNX1	7	94445270	94614213	E023	41.7781	0.00844198	10.1178	0.0175906	0.998764	9.61469	9.09608	8.12226	9.75574	0.163688	0.206751	0.496805	0.539869	7	94574903	94575080	178	+
ENSSSCG00000002333	DPF3	7	95982462	96254318	E018	1.43594	0.311011	10.0964	0.0177644	0.99904	1.83172	0.00549781	1.92125	2.24822	16.7615	17.3534	-0.137825	0.453994	7	96140720	96140732	13	-
ENSSSCG00000002333	DPF3	7	95982462	96254318	E013	7.20892	0.0613243	8.22763	0.0415342	1	3.69501	3.46064	4.88491	3.5485	0.18972	0.072577	-0.809412	-0.926555	7	96083238	96083316	79	-
ENSSSCG00000002337	ZFYVE1	7	96323262	96380284	E017	42.8309	0.015881	13.6831	0.00336978	0.764246	9.32059	8.662	8.48959	10.4925	0.215956	0.566536	0.275094	0.625674	7	96380040	96380271	232	-
ENSSSCG00000002337	ZFYVE1	7	96323262	96380284	E003	25.4907	0.0391176	10.1565	0.0172814	0.996467	6.89417	8.3531	7.33433	6.15959	-0.562356	-0.891104	-0.180967	-0.509715	7	96323574	96323617	44	-
ENSSSCG00000002337	ZFYVE1	7	96323262	96380284	E002	35.3651	0.0322002	11.4646	0.00946156	0.925506	7.94484	9.46674	9.16791	7.36246	-0.515799	-0.738863	-0.421129	-0.644192	7	96323527	96323573	47	-
ENSSSCG00000002340	PSEN1	7	96478190	96569130	E006	288.23	0.00217305	10.13	0.017493	0.998764	22.9192	22.3185	22.7347	23.5168	0.0867621	0.171361	0.0264556	0.111055	7	96517745	96517998	254	+
ENSSSCG00000002341	PAPLN	7	96598584	96625052	E011	7.18311	0.0601605	8.27733	0.0406147	1	2.93739	3.92111	3.92823	4.0635	-0.836036	0.103357	-0.841293	0.0980992	7	96613397	96613874	478	+
ENSSSCG00000002348	ACOT6	7	96984716	96992873	E003	52.6332	0.0174764	7.87742	0.0486143	1	9.97382	10.1381	10.0034	11.0313	-0.0484033	0.250817	-0.00875798	0.290462	7	96989740	96990991	1252	+
ENSSSCG00000002350	MIDEAS	7	97052417	97122966	E020	39.7918	0.0164653	8.75721	0.0326993	1	8.91071	8.20658	9.96261	8.84148	0.242113	0.219141	-0.329531	-0.352503	7	97076906	97076923	18	-
ENSSSCG00000002351	PTGR2	7	97174219	97195595	E005	116.797	0.00449245	9.05379	0.0285842	1	15.4166	14.1514	15.5329	15.3908	0.26122	0.256092	-0.0230542	-0.0281822	7	97184426	97184617	192	+
ENSSSCG00000002351	PTGR2	7	97174219	97195595	E010	90.1544	0.00336308	11.0493	0.0114624	0.946912	13.0871	14.3183	13.3214	12.8194	-0.272206	-0.334466	-0.0535404	-0.1158	7	97192215	97192302	88	+
ENSSSCG00000002352	ZNF410	7	97195975	97243614	E020	83.2003	0.0069389	8.91574	0.0304323	1	13.3081	11.8582	12.9605	13.2667	0.346677	0.33727	0.0798201	0.0704137	7	97236137	97236264	128	+
ENSSSCG00000002352	ZNF410	7	97195975	97243614	E010	56.6164	0.00676478	9.81909	0.0201682	1	11.4128	9.87199	10.8303	10.5579	0.430963	0.199155	0.156089	-0.0757184	7	97212447	97212521	75	+
ENSSSCG00000002357	ALDH6A1	7	97360610	97381830	E013	39.6349	0.0126892	8.86961	0.0310757	1	8.14545	9.50089	9.46859	9.12619	-0.453254	-0.118759	-0.443194	-0.108699	7	97374527	97374605	79	-
ENSSSCG00000002357	ALDH6A1	7	97360610	97381830	E009	60.7142	0.0152226	9.36997	0.0247557	1	10.9744	10.3971	10.9268	12.0992	0.160599	0.452026	0.012936	0.304363	7	97369986	97370167	182	-
ENSSSCG00000002370	AREL1	7	97875220	97940876	E027	14.567	0.0503755	11.0094	0.0116752	0.949647	6.28959	4.53923	5.93346	4.83629	0.94828	0.183968	0.16985	-0.594462	7	97940834	97940876	43	-
ENSSSCG00000002372	YLPM1	7	97976144	98042230	E006	475.476	0.00734607	9.90192	0.0194185	1	29.4499	27.3852	29.2628	27.6306	0.25282	0.0307052	0.0224044	-0.19971	7	98006621	98008735	2115	+
ENSSSCG00000002372	YLPM1	7	97976144	98042230	E021	71.9571	0.0103577	11.1768	0.0108071	0.942753	11.3966	12.461	11.3328	12.6284	-0.267274	0.0400943	0.0167687	0.324137	7	98029449	98029500	52	+
ENSSSCG00000002372	YLPM1	7	97976144	98042230	E018	87.4749	0.00938017	10.5783	0.0142388	0.974046	12.8104	13.6086	12.2679	13.8474	-0.182388	0.0526831	0.130026	0.365097	7	98026199	98026279	81	+
ENSSSCG00000002373	PROX2	7	98064898	98074822	E004	0.442436	0.829837	8.02403	0.0455177	1	0.396101	0.0328546	2.06985	1.18518	7.18346	10.3463	-4.77275	-1.60995	7	98073512	98074822	1311	-
ENSSSCG00000002374	DLST	7	98091124	98111572	E001	6.32478	0.102808	8.28044	0.0405579	1	3.91454	2.4519	3.93521	4.00246	1.35344	1.4178	-0.0152623	0.0490926	7	98091124	98091147	24	+
ENSSSCG00000002374	DLST	7	98091124	98111572	E020	236.115	0.00286434	9.07544	0.0283045	1	20.8436	20.1704	21.164	21.5213	0.10507	0.208127	-0.0490471	0.0540107	7	98107529	98107602	74	+
ENSSSCG00000002374	DLST	7	98091124	98111572	E023	1452.33	0.00558053	8.17814	0.04247	1	42.1109	44.5435	43.1066	43.7996	-0.235676	-0.0714751	-0.0971458	0.0670546	7	98109983	98111568	1586	+
ENSSSCG00000002375	RPS6KL1	7	98112742	98131763	E002	11.2781	0.0347107	9.3814	0.0246271	1	5.13176	4.35837	3.98813	5.24729	0.47414	0.538837	0.731474	0.796171	7	98114519	98114614	96	-
ENSSSCG00000002381	NEK9	7	98275979	98322055	E019	86.4754	0.0148966	8.59777	0.0351456	1	13.7531	12.2431	13.9124	12.6591	0.350484	0.100342	-0.0348827	-0.285024	7	98314296	98314401	106	-
ENSSSCG00000002381	NEK9	7	98275979	98322055	E023	133.496	0.0153167	11.4042	0.00972945	0.929093	16.9659	14.4536	17.1032	16.2265	0.492232	0.354409	-0.0250187	-0.162842	7	98321699	98322055	357	-
ENSSSCG00000002381	NEK9	7	98275979	98322055	E018	116.806	0.00763923	9.96871	0.018834	1	16.0913	14.4578	15.2828	14.5764	0.327739	0.0248833	0.158334	-0.144522	7	98311934	98312065	132	-
ENSSSCG00000002386	IFT43	7	99158892	99254355	E013	83.9851	0.00805445	9.09364	0.0280714	1	12.1385	13.3027	12.2822	13.565	-0.275511	0.0589989	-0.035295	0.299215	7	99254183	99254355	173	+
ENSSSCG00000002386	IFT43	7	99158892	99254355	E004	85.6989	0.00449128	9.60199	0.0222708	1	13.4483	12.9776	13.6454	12.2326	0.10752	-0.177727	-0.0439899	-0.329236	7	99192799	99192863	65	+
ENSSSCG00000002389	VASH1	7	99910497	99929770	E001	3.062	0.22362	9.56664	0.0226329	1	3.00921	2.6221	1.16789	2.95756	0.398159	0.348088	2.7339	2.68383	7	99910497	99910765	269	+
ENSSSCG00000002396	GSTZ1	7	100392271	100408420	E027	14.8218	0.0598551	8.71919	0.033267	1	4.29021	5.69992	6.21658	5.6531	-0.825171	-0.0240033	-1.07788	-0.276711	7	100403870	100404019	150	+
ENSSSCG00000002396	GSTZ1	7	100392271	100408420	E028	2.19656	0.248152	9.65833	0.0217053	1	1.01215	2.94945	2.5058	1.53544	-3.08899	-1.88602	-2.61771	-1.41474	7	100404020	100404020	1	+
ENSSSCG00000002403	VIPAS39	7	100482956	100506161	E020	2.54454	0.318412	11.3604	0.00992857	0.929753	2.34648	2.33262	0.0263107	2.87594	0.0171152	0.605243	12.9595	13.5476	7	100505768	100505846	79	-
ENSSSCG00000002406	AHSA1	7	100510301	100520346	E001	5.72814	0.0408931	17.6525	0.000518731	0.518617	4.25652	2.3068	3.0269	3.92681	1.77246	1.53879	0.987097	0.753433	7	100510301	100510590	290	+
ENSSSCG00000002410	CEP128	7	103345985	103760292	E020	19.1901	0.0245624	13.0293	0.00457374	0.815098	5.38142	5.84324	7.07014	6.97301	-0.239541	0.515556	-0.795531	-0.0404335	7	103664792	103664878	87	-
ENSSSCG00000002410	CEP128	7	103345985	103760292	E025	17.4094	0.0392225	16.456	0.000914212	0.623035	7.14792	5.6186	5.5713	4.79767	0.70208	-0.45902	0.726675	-0.434426	7	103713429	103713558	130	-
ENSSSCG00000002410	CEP128	7	103345985	103760292	E021	18.7334	0.0303509	9.1597	0.0272413	1	5.38157	5.97854	6.5325	7.05577	-0.306121	0.483384	-0.564454	0.225052	7	103691093	103691209	117	-
ENSSSCG00000002414	SEL1L	7	104219411	104283195	E017	99.2874	0.00462639	16.9556	0.000721747	0.567765	14.0654	13.0688	15.1489	14.2232	0.222295	0.256181	-0.226099	-0.192214	7	104250988	104251047	60	-
ENSSSCG00000002414	SEL1L	7	104219411	104283195	E018	92.4872	0.00456202	9.86439	0.0197548	1	13.49	12.9536	14.4668	13.764	0.122456	0.183298	-0.212051	-0.151209	7	104251137	104251190	54	-
ENSSSCG00000002425	PTPN21	7	110373530	110453812	E006	49.3001	0.0125705	12.4904	0.00587878	0.860256	9.79021	10.5239	8.76453	10.7068	-0.214185	0.0512048	0.326577	0.591967	7	110384763	110384843	81	-
ENSSSCG00000002425	PTPN21	7	110373530	110453812	E004	40.8169	0.00853721	9.81311	0.0202235	1	8.8029	8.33927	9.40758	9.95754	0.159146	0.523021	-0.195885	0.16799	7	110378998	110379126	129	-
ENSSSCG00000002426	ZC3H14	7	110463517	110513257	E005	112.864	0.00493037	8.74799	0.032836	1	15.3709	14.059	15.4183	14.7472	0.272027	0.145414	-0.0094353	-0.136048	7	110463562	110463664	103	+
ENSSSCG00000002426	ZC3H14	7	110463517	110513257	E006	109.866	0.00319605	8.38884	0.0386233	1	15.1627	14.0503	15.2077	14.4274	0.232142	0.0804933	-0.00907823	-0.160727	7	110464061	110464103	43	+
ENSSSCG00000002426	ZC3H14	7	110463517	110513257	E022	183.687	0.00469778	10.203	0.016917	0.992103	18.4403	19.2415	17.5197	19.1699	-0.134067	-0.011795	0.160224	0.282496	7	110507659	110507795	137	+
ENSSSCG00000002428	TTC8	7	110731731	110784853	E018	17.1102	0.0162168	7.96609	0.0467177	1	6.14571	5.50408	5.41304	6.62789	0.321012	0.541305	0.369517	0.58981	7	110781119	110781202	84	+
ENSSSCG00000002431	TDP1	7	111767089	111853249	E017	1.77031	0.249625	9.55115	0.0227934	1	2.42743	2.09211	0.0212258	1.82714	0.429521	-0.391144	13.6772	12.8565	7	111837389	111838307	919	+
ENSSSCG00000002434	NRDE2	7	112038234	112090510	E005	38.2592	0.0173701	11.3144	0.010142	0.929753	9.64137	8.99298	8.68708	7.91344	0.205482	-0.375948	0.307397	-0.274033	7	112049112	112049250	139	-
ENSSSCG00000002440	CCDC88C	7	112917534	113045682	E047	33.3159	0.0208714	7.97564	0.0465179	1	8.18497	8.69276	7.1685	7.49389	-0.176943	-0.435602	0.388567	0.129908	7	112979551	112979609	59	-
ENSSSCG00000002440	CCDC88C	7	112917534	113045682	E029	44.7173	0.00755573	9.07572	0.028301	1	8.72703	9.07627	10.1471	9.88776	-0.11559	0.252949	-0.44521	-0.0766716	7	112952967	112953045	79	-
ENSSSCG00000002440	CCDC88C	7	112917534	113045682	E030	75.3958	0.00853668	11.5914	0.00892238	0.919103	11.8644	11.3675	12.9076	12.5457	0.127838	0.295264	-0.252958	-0.0855331	7	112955391	112955654	264	-
ENSSSCG00000002444	FBLN5	7	113423632	113512198	E008	27.7052	0.0188904	9.64383	0.0218495	1	7.07666	7.1296	8.40483	8.0447	-0.0217948	0.353733	-0.504145	-0.128616	7	113450513	113450635	123	-
ENSSSCG00000002445	TRIP11	7	113524430	113600088	E002	111.401	0.0133422	7.83937	0.0494508	1	13.9051	14.6104	15.5274	15.4037	-0.150381	0.161569	-0.336479	-0.0245291	7	113525999	113527311	1313	-
ENSSSCG00000002446	ATXN3L	7	113608783	113645841	E001	49.2231	0.0259346	8.46985	0.0372366	1	8.98703	10.6285	9.03181	10.7834	-0.496317	0.0429864	-0.0146493	0.524654	7	113608783	113609113	331	-
ENSSSCG00000002446	ATXN3L	7	113608783	113645841	E001	49.2231	0.0259346	8.46985	0.0372366	1	8.98703	10.6285	9.03181	10.7834	-0.496317	0.0429864	-0.0146493	0.524654	7	113608783	113609113	331	-
ENSSSCG00000002447	CPSF2	7	113659905	113693764	E008	102.407	0.00772693	12.3249	0.00634904	0.880972	14.1993	13.2868	15.4573	14.0767	0.201148	0.174808	-0.25905	-0.28539	7	113673839	113673954	116	+
ENSSSCG00000002447	CPSF2	7	113659905	113693764	E007	108.485	0.00917138	8.25058	0.0411071	1	14.5364	13.9833	15.7956	14.2821	0.117906	0.0642179	-0.254166	-0.307854	7	113671192	113671321	130	+
ENSSSCG00000002451	RIN3	7	114035353	114166539	E001	47.2214	0.0176929	9.92523	0.0192126	1	9.8639	9.04389	8.88473	10.5754	0.256336	0.462825	0.308655	0.515144	7	114035353	114035619	267	+
ENSSSCG00000002455	GOLGA5	7	114237145	114273915	E005	55.9392	0.022185	8.81779	0.0318141	1	11.1543	9.37901	11.1158	10.8348	0.514063	0.427533	0.0102991	-0.0762313	7	114248918	114248970	53	+
ENSSSCG00000002455	GOLGA5	7	114237145	114273915	E001	47.299	0.0101758	10.3342	0.0159287	0.987438	10.3981	9.3439	10.6015	9.21955	0.316373	-0.0395353	-0.05753	-0.413439	7	114237145	114237293	149	+
ENSSSCG00000002455	GOLGA5	7	114237145	114273915	E014	119.848	0.00710516	9.24327	0.0262253	1	14.6194	16.2086	14.9846	15.4546	-0.316265	-0.146477	-0.075282	0.0945058	7	114273446	114273915	470	+
ENSSSCG00000002455	GOLGA5	7	114237145	114273915	E006	76.079	0.0165296	14.4032	0.00240466	0.732007	13.2948	10.8071	12.178	12.8887	0.620534	0.526991	0.263966	0.170423	7	114249644	114249767	124	+
ENSSSCG00000002457	ITPK1	7	114361968	114520793	E009	81.7651	0.012035	7.95699	0.0469091	1	12.6481	12.9725	13.7124	11.8519	-0.0762139	-0.271242	-0.243747	-0.438776	7	114402315	114402432	118	-
ENSSSCG00000002457	ITPK1	7	114361968	114520793	E010	88.4099	0.00588449	13.1167	0.00439097	0.812153	13.0722	12.8535	14.5434	12.7729	0.0508381	-0.0189362	-0.323108	-0.392882	7	114427789	114427914	126	-
ENSSSCG00000002457	ITPK1	7	114361968	114520793	E007	48.9422	0.0110596	11.6461	0.00869939	0.916269	10.8224	9.78612	8.81479	9.99025	0.298556	0.0611058	0.607063	0.369612	7	114381923	114381963	41	-
ENSSSCG00000002457	ITPK1	7	114361968	114520793	E006	74.891	0.00844867	11.2197	0.0105954	0.936939	12.7241	12.0095	10.9755	12.7044	0.173494	0.168847	0.442301	0.437654	7	114378276	114378441	166	-
ENSSSCG00000002458	TMEM251	7	114574139	114575883	E001	232.144	0.0120072	9.63745	0.0219132	1	21.6268	20.6216	20.9481	20.0995	0.153209	-0.0819492	0.1028	-0.132359	7	114574139	114574622	484	+
ENSSSCG00000002458	TMEM251	7	114574139	114575883	E002	451.513	0.0113246	10.0716	0.0179672	1	26.9027	27.9171	27.5805	28.4703	-0.127277	0.0680787	-0.0854002	0.109956	7	114575058	114575883	826	+
ENSSSCG00000002490	GSC	7	116098327	116101338	E001	119.405	0.0099329	9.28353	0.0257493	1	15.3402	16.0497	14.909	14.8945	-0.138881	-0.229045	0.087201	-0.00296287	7	116098327	116099483	1157	-
ENSSSCG00000002494	CLMN	7	116476791	116590265	E016	1.73856	0.263114	8.19671	0.0421165	1	1.53398	0.988201	2.36594	2.08299	1.26933	2.15284	-1.25151	-0.368	7	116489817	116490512	696	-
ENSSSCG00000002495	SYNE3	7	116665435	116770302	E037	46.5122	0.0160218	8.28838	0.040413	1	10.0192	10.4887	8.71555	9.51714	-0.135796	-0.287861	0.411505	0.25944	7	116724204	116724376	173	-
ENSSSCG00000002495	SYNE3	7	116665435	116770302	E025	29.1794	0.0136366	13.7279	0.00329988	0.764246	7.70381	8.7434	7.34497	6.86298	-0.371764	-0.709912	0.139693	-0.198456	7	116697368	116697511	144	-
ENSSSCG00000002502	ATG2B	7	117506302	117586545	E004	46.8516	0.0128223	23.3243	3.45614e-05	0.250648	8.63136	10.9554	8.73497	10.4355	-0.70529	-0.144505	-0.0351149	0.52567	7	117507298	117507360	63	-
ENSSSCG00000002502	ATG2B	7	117506302	117586545	E003	62.348	0.0248649	14.3384	0.00247891	0.741415	9.71178	12.1392	10.685	12.094	-0.663894	-0.0111781	-0.2831	0.369616	7	117507027	117507297	271	-
ENSSSCG00000002502	ATG2B	7	117506302	117586545	E036	19.9406	0.0186823	9.60865	0.0222032	1	6.51744	5.40191	6.61061	7.04272	0.546749	0.773122	-0.0414252	0.184948	7	117560816	117560966	151	-
ENSSSCG00000002502	ATG2B	7	117506302	117586545	E033	28.8395	0.0216452	7.89888	0.0481484	1	8.70398	7.27887	7.28766	7.43551	0.52461	0.0623149	0.521079	0.0587838	7	117555265	117555538	274	-
ENSSSCG00000002505	PAPOLA	7	117676398	117741911	E029	1821.21	0.00624762	11.0096	0.0116739	0.949647	45.9372	48.3617	45.6421	46.9518	-0.227069	-0.13151	0.0279456	0.123505	7	117738501	117740338	1838	+
ENSSSCG00000002505	PAPOLA	7	117676398	117741911	E007	397.633	0.00257679	11.8293	0.00799124	0.908484	26.8605	25.463	26.8613	26.1472	0.181184	0.0895674	-0.000100661	-0.0917172	7	117694199	117694265	67	+
ENSSSCG00000002505	PAPOLA	7	117676398	117741911	E027	500.655	0.00183729	8.63544	0.034552	1	28.2663	29.9292	28.7025	28.8975	-0.200406	-0.123444	-0.0533066	0.0236558	7	117738166	117738458	293	+
ENSSSCG00000002506	VRK1	7	117942973	118028923	E018	190.147	0.00551944	7.95127	0.0470295	1	18.195	18.9713	18.0035	19.7572	-0.131393	0.128543	0.0331474	0.293083	7	118004191	118004369	179	+
ENSSSCG00000002506	VRK1	7	117942973	118028923	E014	104.425	0.00323978	10.5124	0.0146773	0.977208	14.1884	13.2827	14.5059	14.6067	0.199765	0.288157	-0.0672885	0.0211037	7	117998557	117998689	133	+
ENSSSCG00000002508	SETD3	7	120412545	120486686	E037	10.4423	0.0863582	7.99492	0.0461168	1	5.71369	4.33215	4.73628	3.76941	0.803987	-0.403233	0.545239	-0.661981	7	120486628	120486643	16	-
ENSSSCG00000002508	SETD3	7	120412545	120486686	E015	79.8369	0.00814384	10.0523	0.0181271	1	12.3454	13.5179	12.9719	11.7382	-0.273293	-0.42437	-0.148851	-0.299929	7	120420031	120420058	28	-
ENSSSCG00000002508	SETD3	7	120412545	120486686	E038	8.28281	0.070043	8.07748	0.0444373	1	5.09381	3.67371	4.25628	3.49772	0.947774	-0.14213	0.521295	-0.568609	7	120486644	120486658	15	-
ENSSSCG00000002509	CCNK	7	120487206	120514014	E002	154.582	0.00272584	11.2561	0.0104185	0.933916	17.556	17.2805	17.9221	16.3922	0.0492498	-0.163557	-0.0644406	-0.277248	7	120498759	120499007	249	+
ENSSSCG00000002509	CCNK	7	120487206	120514014	E001	57.8576	0.0179228	7.86687	0.0488446	1	11.3729	10.913	11.3452	9.68863	0.122994	-0.352974	0.00727432	-0.468693	7	120487206	120487266	61	+
ENSSSCG00000002515	SLC25A47	7	121192433	121210374	E008	17.3256	0.0380347	9.37012	0.024754	1	5.30606	5.58867	5.97945	6.8198	-0.150909	0.580284	-0.347647	0.383545	7	121208970	121209297	328	+
ENSSSCG00000002516	WARS1	7	121212981	121238113	E008	192.554	0.00530651	8.02289	0.0455409	1	19.9049	18.5581	18.5161	19.4671	0.221605	0.150963	0.22873	0.158088	7	121222243	121222425	183	-
ENSSSCG00000002516	WARS1	7	121212981	121238113	E010	217.05	0.00582198	9.26124	0.0260119	1	20.2645	19.136	20.8291	20.5674	0.182009	0.229447	-0.0879855	-0.0405478	7	121224913	121225021	109	-
ENSSSCG00000002516	WARS1	7	121212981	121238113	E009	190.209	0.00659505	9.98448	0.0186985	1	19.7586	17.9798	19.0928	19.2581	0.297415	0.21607	0.108605	0.0272596	7	121223227	121223346	120	-
ENSSSCG00000002523	CDC42BPB	AEMK02000452.1	1650035	1752433	E046	56.521	0.0131498	7.9212	0.0476686	1	11.3797	11.0406	10.8982	9.86909	0.090168	-0.33299	0.128827	-0.294331	AEMK02000452.1	1752081	1752201	121	-
ENSSSCG00000002523	CDC42BPB	AEMK02000452.1	1650035	1752433	E032	51.0405	0.00670081	11.9337	0.00761381	0.898743	10.4879	9.21962	11.0027	10.2178	0.381413	0.304003	-0.142471	-0.219881	AEMK02000452.1	1683398	1683399	2	-
ENSSSCG00000002523	CDC42BPB	AEMK02000452.1	1650035	1752433	E012	95.4492	0.00328669	12.2231	0.00665677	0.888582	14.0618	13.9798	12.728	14.4086	0.0177499	0.0917709	0.301112	0.375133	AEMK02000452.1	1661971	1662072	102	-
ENSSSCG00000002530	CINP	AEMK02000452.1	1141194	1154103	E009	15.0393	0.0648737	10.3204	0.0160298	0.987438	6.8406	5.47463	5.32992	4.61355	0.649146	-0.497087	0.727038	-0.419196	AEMK02000452.1	1153821	1154103	283	-
ENSSSCG00000002532	ENSSSCG00000002532	AEMK02000452.1	1125652	1137318	E003	29.0388	0.0158155	8.60752	0.0349909	1	6.91571	7.7354	8.32471	7.91409	-0.327781	0.0669617	-0.543238	-0.148496	AEMK02000452.1	1133045	1133137	93	+
ENSSSCG00000002533	WDR20	AEMK02000452.1	978438	1045335	E009	1.40352	0.414072	7.9263	0.0475596	1	0.793713	1.94312	2.52453	1.1832	-2.58458	-1.43227	-3.34085	-2.18854	AEMK02000452.1	1037683	1037706	24	+
ENSSSCG00000002535	HSP90AA1	AEMK02000452.1	916829	922669	E006	3494.68	0.00113699	9.3302	0.0252081	1	57.6443	57.4089	56.5116	56.9303	0.0207185	-0.0421778	0.0998742	0.036978	AEMK02000452.1	919226	919373	148	-
ENSSSCG00000002535	HSP90AA1	AEMK02000452.1	916829	922669	E013	1300.64	0.00571961	7.98954	0.0462284	1	42.5073	40.9001	42.6546	41.1102	0.158334	0.0208627	-0.0143731	-0.151845	AEMK02000452.1	921948	921959	12	-
ENSSSCG00000002540	PPP2R5C	AEMK02000452.1	660482	799619	E027	3.95846	0.126825	12.0424	0.00723948	0.898743	3.16114	2.15326	4.02422	2.11673	1.1099	-0.0494203	-0.698895	-1.85822	AEMK02000452.1	796864	796923	60	+
ENSSSCG00000002540	PPP2R5C	AEMK02000452.1	660482	799619	E006	156.429	0.00627467	11.6841	0.00854743	0.913257	17.7134	16.1439	17.7419	17.7748	0.287733	0.298541	-0.00501231	0.00579598	AEMK02000452.1	680404	680569	166	+
ENSSSCG00000002540	PPP2R5C	AEMK02000452.1	660482	799619	E014	389.837	0.0031449	10.8863	0.0123567	0.961747	26.9013	25.2126	26.234	25.9536	0.219596	0.0976105	0.0855691	-0.0364164	AEMK02000452.1	764826	764936	111	+
ENSSSCG00000002540	PPP2R5C	AEMK02000452.1	660482	799619	E020	794.309	0.0031376	9.25979	0.026029	1	33.7955	35.7971	34.3915	34.9818	-0.216199	-0.0872267	-0.0651111	0.0638613	AEMK02000452.1	780716	780886	171	+
ENSSSCG00000002547	KLC1	AEMK02000452.1	2153300	2220598	E027	68.6627	0.00486933	13.5518	0.00358321	0.772405	11.647	12.8764	11.2458	11.0545	-0.300976	-0.456756	0.104637	-0.0511437	AEMK02000452.1	2206216	2206266	51	+
ENSSSCG00000002547	KLC1	AEMK02000452.1	2153300	2220598	E019	321.244	0.00347887	8.74708	0.0328497	1	23.4005	23.4161	24.4322	24.6764	-0.0021983	0.173773	-0.142822	0.0331498	AEMK02000452.1	2196760	2196809	50	+
ENSSSCG00000002547	KLC1	AEMK02000452.1	2153300	2220598	E008	1.59476	0.365509	12.8506	0.0049711	0.82965	2.29245	2.27538	1.65515	0.0118858	0.0215905	-15.1634	0.940813	-14.2442	AEMK02000452.1	2162338	2162513	176	+
ENSSSCG00000002552	TDRD9	AEMK02000452.1	2393955	2478763	E033	1.71731	0.259518	15.5592	0.00139607	0.689071	1.86955	3.83865	1.47041	1.00309	-2.08012	-3.87754	0.693453	-1.10397	AEMK02000452.1	2468510	2468648	139	+
ENSSSCG00000002555	JAG2	AEMK02000452.1	3262244	3284882	E027	1.27656	0.21444	9.95876	0.01892	1	1.13883	1.99105	2.04016	0.567062	-1.61298	-3.6253	-1.68335	-3.69567	AEMK02000452.1	3270147	3270260	114	-
ENSSSCG00000002557	NUDT14	AEMK02000452.1	3289582	3296907	E005	19.0253	0.0555079	8.21208	0.0418261	1	7.61644	6.2885	6.00154	5.30507	0.559849	-0.495046	0.695963	-0.358932	AEMK02000452.1	3296723	3296907	185	-
ENSSSCG00000002558	CEP170B	AEMK02000452.1	3105847	3130948	E008	7.57123	0.12193	8.57571	0.0354978	1	3.92129	2.45671	4.42563	4.47192	1.35278	1.73368	-0.350721	0.0301797	AEMK02000452.1	3118039	3118074	36	+
ENSSSCG00000002558	CEP170B	AEMK02000452.1	3105847	3130948	E012	27.4966	0.0118216	8.88287	0.0308894	1	6.90827	8.29679	7.49436	6.99351	-0.536513	-0.500674	-0.238184	-0.202345	AEMK02000452.1	3120817	3121541	725	+
ENSSSCG00000002558	CEP170B	AEMK02000452.1	3105847	3130948	E013	13.6955	0.0261982	10.5244	0.0145964	0.9769	4.49386	6.06492	5.38477	4.84939	-0.871404	-0.650437	-0.525222	-0.304255	AEMK02000452.1	3121620	3121760	141	+
ENSSSCG00000002628	CILK1	7	46658681	46723585	E003	26.0807	0.0134255	14.871	0.00193026	0.710137	6.81555	6.49854	7.88566	8.12852	0.139043	0.654853	-0.426807	0.0890027	7	46667391	46667519	129	-
ENSSSCG00000002629	FBXO9	7	46723680	46748121	E003	370.36	0.00287978	9.90701	0.0193733	1	24.9738	24.5606	25.6443	23.8849	0.0557337	-0.092645	-0.0890181	-0.237397	7	46727628	46727714	87	+
ENSSSCG00000002629	FBXO9	7	46723680	46748121	E002	260.513	0.00459779	14.6619	0.00212965	0.719079	21.9902	20.9659	21.6254	19.8337	0.154072	-0.177485	0.0542063	-0.277351	7	46723932	46723974	43	+
ENSSSCG00000002635	SPIRE2	6	211487	243561	E012	20.4866	0.0292683	11.2543	0.0104271	0.933916	5.50823	6.55538	7.44035	6.38579	-0.507008	-0.0764656	-0.877118	-0.446575	6	225626	225706	81	-
ENSSSCG00000002640	DEF8	6	140908	160692	E003	18.2217	0.0523071	11.752	0.00828272	0.909635	4.73354	6.3417	6.38191	6.91717	-0.850706	0.25354	-0.86914	0.235106	6	144122	144130	9	-
ENSSSCG00000002645	GALNS	6	869244	890134	E011	167.381	0.00228852	10.4034	0.0154305	0.985234	17.7549	17.2783	17.1775	18.4358	0.0848011	0.202651	0.102994	0.220844	6	883122	883224	103	+
ENSSSCG00000002648	CBFA2T3	6	779366	853822	E004	20.8722	0.0367972	9.09742	0.0280234	1	7.02393	6.58242	7.26064	5.36061	0.189612	-0.598019	-0.0969279	-0.88456	6	841817	841906	90	+
ENSSSCG00000002650	APRT	6	890831	893276	E005	594.474	0.00231304	8.31911	0.039857	1	30.2254	31.4899	30.9353	31.137	-0.146717	-0.0405682	-0.0828329	0.0233157	6	892866	893276	411	+
ENSSSCG00000002654	FBXO31	6	1949276	1995462	E003	84.9514	0.00439074	9.22227	0.0264771	1	13.1332	13.3191	11.8979	13.2139	-0.0424385	-0.0239405	0.296746	0.315244	6	1974253	1974329	77	+
ENSSSCG00000002654	FBXO31	6	1949276	1995462	E011	201.493	0.00343913	7.93982	0.0472719	1	19.2993	19.0766	18.9962	20.2961	0.0366996	0.196802	0.0500481	0.210151	6	1992648	1993160	513	+
ENSSSCG00000002664	GSE1	6	3246764	3349122	E006	278.683	0.00282455	8.96391	0.0297747	1	21.9308	22.8283	23.2594	22.012	-0.130713	-0.118721	-0.192099	-0.180107	6	3253329	3253694	366	-
ENSSSCG00000002666	KIAA0513	6	3724785	3779924	E021	23.8589	0.0643781	8.48159	0.0370398	1	6.98002	5.69309	7.27819	8.27077	0.59427	1.09136	-0.122321	0.374769	6	3779763	3779924	162	-
ENSSSCG00000002669	CRISPLD2	6	3881725	3944583	E014	1.55267	0.300327	11.9747	0.00747018	0.898743	0.877698	2.55413	1.39697	0.591077	-3.08427	-4.22519	-1.34147	-2.48238	6	3909438	3909849	412	-
ENSSSCG00000002669	CRISPLD2	6	3881725	3944583	E021	498.915	0.00428917	7.899	0.0481459	1	28.7195	28.2226	29.1946	28.1467	0.0607539	-0.00934572	-0.0574323	-0.127532	6	3929225	3929536	312	-
ENSSSCG00000002670	USP10	6	3977231	4043533	E006	129.69	0.00490949	10.735	0.0132486	0.968437	15.6038	16.8764	15.1977	15.5267	-0.241818	-0.257023	0.0808187	0.0656139	6	3991342	3991441	100	-
ENSSSCG00000002675	DNAAF1	6	4457291	4479828	E005	2.45582	0.303002	8.22152	0.0416486	1	3.26041	1.72015	1.92636	2.15657	1.84796	0.653047	1.521	0.326081	6	4464542	4464832	291	-
ENSSSCG00000002681	HSDL1	6	4479933	4501236	E004	59.6505	0.0113901	7.82945	0.0496711	1	11.5587	10.4464	11.1565	10.8485	0.301233	0.11223	0.105658	-0.0833452	6	4490766	4490991	226	+
ENSSSCG00000002681	HSDL1	6	4479933	4501236	E007	397.995	0.00940403	10.2329	0.016687	0.992103	25.3184	27.2661	26.1825	26.584	-0.251675	-0.0866518	-0.113293	0.0517304	6	4499058	4501236	2179	+
ENSSSCG00000002682	MBTPS1	6	4503565	4558609	E007	240.936	0.00354685	11.8804	0.00780442	0.903952	20.7031	20.7618	22.4928	20.9236	-0.00908867	0.024923	-0.268123	-0.234112	6	4522604	4522714	111	+
ENSSSCG00000002682	MBTPS1	6	4503565	4558609	E013	316.371	0.00244204	7.99139	0.04619	1	23.7086	24.5669	24.153	23.1996	-0.118	-0.189496	-0.0614946	-0.13299	6	4534357	4534518	162	+
ENSSSCG00000002688	PLCG2	6	6433153	6603060	E015	116.639	0.00313425	7.91477	0.0478064	1	14.6871	15.5141	15.2951	14.1651	-0.167509	-0.277628	-0.123938	-0.234057	6	6487591	6487771	181	-
ENSSSCG00000002688	PLCG2	6	6433153	6603060	E016	101.162	0.00788525	10.2204	0.0167829	0.992103	13.5285	14.3883	14.9537	12.9979	-0.186881	-0.307663	-0.304375	-0.425157	6	6492473	6492592	120	-
ENSSSCG00000002688	PLCG2	6	6433153	6603060	E019	93.365	0.00525211	9.80087	0.0203369	1	13.3437	12.8806	13.6286	14.3803	0.106505	0.333268	-0.0638872	0.162875	6	6494534	6494623	90	-
ENSSSCG00000002689	CMIP	6	6654411	6881813	E023	167.256	0.00535729	9.02792	0.028922	1	17.4146	16.9989	18.4528	18.6738	0.0751136	0.293642	-0.181093	0.0374357	6	6881318	6881492	175	-
ENSSSCG00000002700	ENSSSCG00000002700	6	10700862	10705646	E010	1.40218	0.241387	11.5277	0.00918916	0.921047	2.22775	1.32873	2.26397	0.763188	1.4923	-1.60033	-0.0465947	-3.13923	6	10705594	10705646	53	-
ENSSSCG00000002707	GABARAPL2	6	12107422	12132991	E013	16.5093	0.0162023	11.3599	0.00993063	0.929753	5.08429	5.32742	6.29796	6.54768	-0.135752	0.60063	-0.622955	0.113427	6	12132966	12132991	26	-
ENSSSCG00000002708	TMEM231	6	12140687	12164140	E007	192.42	0.0153101	8.4916	0.0368727	1	17.958	19.4271	20.1789	18.9777	-0.247532	-0.0740075	-0.368246	-0.194722	6	12162248	12164140	1893	+
ENSSSCG00000002714	WDR59	6	12682184	12768728	E021	26.432	0.0237766	10.9666	0.0119078	0.954542	7.69645	6.59109	8.45579	6.83137	0.453382	0.104548	-0.27617	-0.625003	6	12739936	12740089	154	+
ENSSSCG00000002714	WDR59	6	12682184	12768728	E020	21.0835	0.0389708	13.0243	0.00458427	0.815671	7.31293	6.03715	7.55507	5.53227	0.559667	-0.254221	-0.0953643	-0.909252	6	12734250	12734319	70	+
ENSSSCG00000002714	WDR59	6	12682184	12768728	E019	27.4048	0.0335749	8.55265	0.0358698	1	7.94095	7.25746	8.38844	6.57132	0.263659	-0.290186	-0.16097	-0.714815	6	12733585	12733741	157	+
ENSSSCG00000002715	RFWD3	6	12952253	12994052	E010	91.0032	0.0092149	9.38095	0.0246321	1	13.665	13.2498	12.8701	12.1387	0.0932558	-0.263418	0.18092	-0.175754	6	12985786	12985962	177	+
ENSSSCG00000002716	MLKL	6	12924894	12951173	E001	15.2435	0.0297163	17.5056	0.000556158	0.518617	6.42628	4.52385	5.00351	6.21823	1.02083	0.924863	0.7283	0.632336	6	12924894	12925111	218	+
ENSSSCG00000002716	MLKL	6	12924894	12951173	E012	256.394	0.0115497	8.48672	0.0369541	1	20.6199	22.6102	21.5567	22.0734	-0.298012	-0.0782772	-0.142974	0.0767604	6	12948319	12951173	2855	+
ENSSSCG00000002723	AARS1	6	13298330	13321383	E025	123.774	0.0197344	18.5778	0.000334239	0.493219	17.1147	13.2427	15.719	15.8826	0.784516	0.553608	0.262732	0.0318232	6	13321322	13321383	62	-
ENSSSCG00000002723	AARS1	6	13298330	13321383	E022	242.081	0.0104798	9.41325	0.0242724	1	22.4305	19.7479	21.5032	21.0885	0.409837	0.210012	0.137021	-0.0628043	6	13317760	13317925	166	-
ENSSSCG00000002723	AARS1	6	13298330	13321383	E010	405.904	0.00117467	11.0719	0.0113434	0.94616	26.5052	26.8999	27.1686	25.9192	-0.0504178	-0.126277	-0.0844572	-0.160317	6	13304032	13304142	111	-
ENSSSCG00000002724	PDPR	6	13187427	13227033	E018	194.918	0.00919371	12.1652	0.00683811	0.894728	19.1698	20.5934	18.4408	18.9474	-0.227921	-0.264781	0.122172	0.0853116	6	13225628	13227033	1406	+
ENSSSCG00000002734	MARVELD3	6	14616481	14625983	E006	5.76931	0.259305	8.79028	0.0322132	1	3.59202	3.37063	2.76707	3.0553	0.184141	-0.284188	0.754879	0.28655	6	14624487	14625983	1497	+
ENSSSCG00000002740	AP1G1	6	14719959	14809491	E003	115.506	0.00590589	9.03405	0.0288416	1	15.7058	15.0193	14.2742	15.237	0.136926	0.0440156	0.291993	0.199083	6	14729467	14729627	161	-
ENSSSCG00000002740	AP1G1	6	14719959	14809491	E002	98.4522	0.00546418	12.0036	0.00737091	0.898743	14.6524	13.7459	13.0462	14.337	0.194019	0.127772	0.351869	0.285621	6	14725616	14725714	99	-
ENSSSCG00000002749	ENSSSCG00000002749	6	14980382	14988813	E001	220.471	0.00946099	8.24736	0.0411669	1	19.2367	17.9515	18.5901	18.398	0.21748	0.0769897	0.107848	-0.032642	6	14980382	14980535	154	+
ENSSSCG00000002749	ENSSSCG00000002749	6	14980382	14988813	E001	220.471	0.00946099	8.24736	0.0411669	1	19.2367	17.9515	18.5901	18.398	0.21748	0.0769897	0.107848	-0.032642	6	14980382	14980535	154	+
ENSSSCG00000002759	COG8	6	17645590	17650481	E004	77.2982	0.0129412	11.1732	0.0108253	0.943302	11.5933	13.0496	11.7793	13.0203	-0.355066	-0.0067738	-0.0475921	0.3007	6	17650221	17650481	261	+
ENSSSCG00000002763	PRMT7	6	28883646	28945905	E017	80.7102	0.0037542	11.6522	0.00867467	0.916158	13.3588	12.0069	12.2193	12.9574	0.320877	0.228839	0.268334	0.176296	6	28925995	28926042	48	+
ENSSSCG00000002763	PRMT7	6	28883646	28945905	E005	16.4151	0.043709	9.27465	0.0258536	1	5.19764	5.23958	7.1206	5.75019	-0.0233537	0.270463	-0.917331	-0.623514	6	28886472	28886505	34	+
ENSSSCG00000002763	PRMT7	6	28883646	28945905	E018	117.752	0.00262072	8.4915	0.0368745	1	15.4141	15.1725	14.3821	15.503	0.0483719	0.0660085	0.211574	0.229211	6	28926913	28927002	90	+
ENSSSCG00000002763	PRMT7	6	28883646	28945905	E007	197.472	0.00617675	10.344	0.0158574	0.987438	19.4254	18.2059	20.3031	19.3777	0.204317	0.196535	-0.140595	-0.148377	6	28887400	28887578	179	+
ENSSSCG00000002767	TSNAXIP1	6	28428917	28450563	E016	2.2564	0.281108	7.87669	0.04863	1	1.95485	2.02069	3.20301	1.36015	-0.0956917	-1.14303	-1.42721	-2.47455	6	28449881	28450563	683	+
ENSSSCG00000002771	EDC4	6	28489422	28501510	E006	91.3152	0.00930109	8.8403	0.0314913	1	14.2989	12.621	13.7652	13.3732	0.377286	0.174473	0.115434	-0.0873783	6	28494528	28494675	148	+
ENSSSCG00000002771	EDC4	6	28489422	28501510	E028	126.365	0.00467364	12.8217	0.00503851	0.829842	14.9321	16.916	15.3974	15.5711	-0.383796	-0.255523	-0.0938722	0.0344007	6	28500575	28500738	164	+
ENSSSCG00000002771	EDC4	6	28489422	28501510	E022	104.191	0.00310393	12.3243	0.00635103	0.880972	14.4711	14.1942	13.463	15.1819	0.0587483	0.205085	0.219018	0.365354	6	28498657	28498834	178	+
ENSSSCG00000002771	EDC4	6	28489422	28501510	E018	131.527	0.00572223	12.2634	0.00653332	0.884149	15.5107	15.2791	16.3487	17.0488	0.0461009	0.337814	-0.161913	0.129799	6	28497560	28497993	434	+
ENSSSCG00000002771	EDC4	6	28489422	28501510	E001	121.822	0.0108658	9.98464	0.0186971	1	16.1505	15.3275	16.2138	14.2767	0.160699	-0.216699	-0.0120494	-0.389448	6	28489422	28489790	369	+
ENSSSCG00000002771	EDC4	6	28489422	28501510	E009	65.9943	0.00524119	12.847	0.00497934	0.82965	11.9512	11.6891	12.1405	10.4998	0.0663402	-0.31964	-0.0470697	-0.43305	6	28495400	28495483	84	+
ENSSSCG00000002774	RIPOR1	6	28132115	28183780	E026	104.192	0.00404293	8.12087	0.0435787	1	14.1255	13.4928	14.7296	14.7017	0.138834	0.260491	-0.127436	-0.00577964	6	28178580	28178712	133	+
ENSSSCG00000002776	ATP6V0D1	6	28090183	28131985	E012	528.934	0.00269186	9.28105	0.0257784	1	29.8965	28.8205	30.394	29.6565	0.128901	0.100411	-0.0585772	-0.0870674	6	28096167	28096345	179	-
ENSSSCG00000002782	PLEKHG4	6	27923617	27933153	E008	4.16533	0.0609935	8.26345	0.0408695	1	2.98208	2.11516	2.95762	3.64093	0.992795	1.57045	0.0238201	0.601473	6	27925211	27925327	117	+
ENSSSCG00000002787	E2F4	6	27834411	27841416	E009	222.477	0.00535932	8.50287	0.0366855	1	20.8451	19.8179	20.5006	19.3747	0.161445	-0.0717778	0.0534166	-0.179806	6	27840364	27840408	45	+
ENSSSCG00000002799	CNOT1	6	20271596	20372245	E007	167.194	0.00575278	9.5704	0.0225941	1	16.9901	18.5354	17.2395	18.7049	-0.271846	0.0286436	-0.0452587	0.255231	6	20280785	20280886	102	-
ENSSSCG00000002799	CNOT1	6	20271596	20372245	E008	180.529	0.00916122	9.44914	0.0238786	1	17.506	19.3321	17.837	19.4124	-0.311595	0.0131246	-0.0584549	0.266264	6	20281888	20282005	118	-
ENSSSCG00000002802	GINS3	6	20162636	20170258	E002	78.9071	0.01409	8.85167	0.0313295	1	12.2791	11.5701	13.6374	12.8326	0.17802	0.310525	-0.316094	-0.183589	6	20162677	20163020	344	+
ENSSSCG00000002802	GINS3	6	20162636	20170258	E003	85.9243	0.00856439	7.83525	0.0495423	1	13.6341	12.9644	13.1223	12.1993	0.152084	-0.182815	0.115594	-0.219305	6	20166636	20166869	234	+
ENSSSCG00000002804	CSNK2A2	6	19976930	20016923	E016	10.1027	0.100302	8.60543	0.035024	1	5.91038	3.91805	4.16905	4.13716	1.19372	0.157689	1.01378	-0.0222527	6	20016761	20016923	163	-
ENSSSCG00000002804	CSNK2A2	6	19976930	20016923	E002	0.595974	0.439617	7.91585	0.0477833	1	1.61095	1.34306	0.0123907	0.0113662	0.525072	-13.7699	14.046	-0.248996	6	19983101	19983120	20	-
ENSSSCG00000002806	MMP15	6	19891107	19912913	E004	95.216	0.0157353	8.57461	0.0355155	1	14.5215	12.8473	14.2535	13.2663	0.370813	0.0967606	0.0566599	-0.217393	6	19905688	19905995	308	+
ENSSSCG00000002808	ZNF319	6	19842585	19851288	E002	14.4719	0.0294391	11.5817	0.00896233	0.919103	4.6458	6.14608	5.91939	5.25424	-0.813662	-0.456249	-0.704183	-0.346771	6	19851010	19851288	279	-
ENSSSCG00000002808	ZNF319	6	19842585	19851288	E001	202.21	0.0120649	15.7661	0.00126634	0.67967	20.073	19.2095	19.3239	19.6898	0.139595	0.0782761	0.120813	0.0594935	6	19842585	19848955	6371	-
ENSSSCG00000002812	KIFC3	6	19659616	19696073	E010	92.8399	0.00553252	8.21779	0.0417187	1	12.6741	13.921	13.5234	13.9507	-0.283325	0.00647316	-0.195588	0.0942098	6	19666153	19666257	105	-
ENSSSCG00000002812	KIFC3	6	19659616	19696073	E011	144.948	0.00326135	7.88934	0.0483549	1	15.8996	17.0242	16.6507	17.1471	-0.211174	0.022337	-0.14242	0.0910904	6	19667282	19667463	182	-
ENSSSCG00000002814	ADGRG3	6	19574530	19599080	E004	73.7202	0.0140709	8.78259	0.0323256	1	11.1016	11.1125	11.2474	9.41911	-0.00292784	-0.490273	-0.0388825	-0.526227	6	19589465	19589611	147	+
ENSSSCG00000002815	ADGRG1	6	19527648	19570893	E014	54.4882	0.0114861	10.6549	0.0137462	0.968875	10.8744	10.9322	9.24923	10.5435	-0.0157867	-0.107647	0.479511	0.38765	6	19560777	19560924	148	+
ENSSSCG00000002815	ADGRG1	6	19527648	19570893	E022	114.343	0.00287119	10.0989	0.0177438	0.99904	14.7607	14.2752	15.2458	15.5852	0.101842	0.268128	-0.0988118	0.0674741	6	19567770	19568038	269	+
ENSSSCG00000002817	DRC7	6	19603399	19629172	E013	0.957046	0.429612	7.84181	0.0493966	1	1.93975	1.7551	0.869656	0.582254	0.28889	-3.18472	2.31585	-1.15775	6	19624113	19624328	216	+
ENSSSCG00000002820	RSPRY1	6	19154417	19204826	E020	274.771	0.0084325	9.81818	0.0201766	1	21.647	23.0252	21.3927	22.9814	-0.201045	-0.00623641	0.0381897	0.232998	6	19203408	19204826	1419	+
ENSSSCG00000002825	ENSSSCG00000002825	6	29884250	29912902	E009	2.4348	0.421314	10.0134	0.0184529	1	3.29253	2.41706	1.1244	0.0170485	0.893797	-14.2972	3.10374	-12.0872	6	29890394	29890420	27	-
ENSSSCG00000002825	ENSSSCG00000002825	6	29884250	29912902	E019	4.44993	0.0829529	8.35218	0.0392672	1	3.1498	2.53147	2.41505	4.12892	0.631917	1.41565	0.767984	1.55172	6	29909529	29909733	205	-
ENSSSCG00000002825	ENSSSCG00000002825	6	29884250	29912902	E023	4.11301	0.0841477	10.3589	0.0157492	0.987438	3.15006	2.42715	2.15085	4.12938	0.753776	1.5376	1.10297	1.88679	6	29912816	29912898	83	-
ENSSSCG00000002825	ENSSSCG00000002825	6	29884250	29912902	E020	2.06656	0.23343	24.4358	2.02567e-05	0.233698	2.77282	1.47486	0.00871094	3.7922	1.82367	2.7296	16.6316	17.5375	6	29909734	29909736	3	-
ENSSSCG00000002841	N4BP1	6	36122035	36174504	E001	116.057	0.0144482	16.185	0.00103911	0.636795	16.5625	14.4712	15.7701	13.5833	0.414005	-0.192135	0.15113	-0.45501	6	36122035	36122478	444	+
ENSSSCG00000002844	PHKB	6	36991274	37193593	E029	76.1463	0.0118958	12.3629	0.00623794	0.877041	12.5816	11.2887	11.8764	13.385	0.324602	0.511122	0.173002	0.359522	6	37164404	37164542	139	-
ENSSSCG00000002844	PHKB	6	36991274	37193593	E030	67.0313	0.00633693	8.62319	0.0347439	1	11.4687	10.8855	11.7072	12.3843	0.155552	0.385469	-0.061494	0.168423	6	37166428	37166517	90	-
ENSSSCG00000002844	PHKB	6	36991274	37193593	E028	68.472	0.0127695	8.16849	0.0426549	1	11.6264	10.9216	11.5573	12.7655	0.186469	0.46672	0.0177857	0.298038	6	37159165	37159264	100	-
ENSSSCG00000002844	PHKB	6	36991274	37193593	E012	103.137	0.00642451	8.18269	0.0423832	1	14.0218	15.0754	13.3491	14.4879	-0.220668	-0.121264	0.148824	0.248228	6	37038402	37038492	91	-
ENSSSCG00000002844	PHKB	6	36991274	37193593	E021	57.2022	0.010679	8.16294	0.0427615	1	11.2316	9.84497	11.373	10.5975	0.391331	0.218395	-0.0373144	-0.21025	6	37094868	37094925	58	-
ENSSSCG00000002844	PHKB	6	36991274	37193593	E023	58.0171	0.0274752	10.2051	0.016901	0.992103	11.3156	10.0124	12.0512	10.0164	0.363617	0.00116901	-0.188277	-0.550725	6	37099100	37099195	96	-
ENSSSCG00000002846	DNAJA2	6	37591916	37608361	E003	149.603	0.00407652	14.1193	0.00274724	0.753981	17.9939	16.2603	17.2084	16.5784	0.314688	0.0598317	0.139219	-0.115638	6	37593611	37593670	60	+
ENSSSCG00000002846	DNAJA2	6	37591916	37608361	E008	4.31462	0.111581	17.2259	0.000635026	0.539734	4.19566	2.13781	1.98711	3.25046	1.95052	1.21132	2.16167	1.42247	6	37596615	37596670	56	+
ENSSSCG00000002846	DNAJA2	6	37591916	37608361	E001	31.9824	0.0259089	11.2586	0.0104067	0.933916	8.4082	8.52369	8.53053	6.67133	-0.0401083	-0.717751	-0.0424671	-0.72011	6	37591916	37591964	49	+
ENSSSCG00000002846	DNAJA2	6	37591916	37608361	E002	149.93	0.00281804	15.8277	0.00123002	0.678463	17.5406	16.9336	17.6361	15.9512	0.109506	-0.184635	-0.0169317	-0.311073	6	37591965	37592124	160	+
ENSSSCG00000002846	DNAJA2	6	37591916	37608361	E015	201.765	0.00629361	7.94885	0.0470808	1	18.4242	19.4788	19.1044	20.6532	-0.175609	0.186584	-0.114184	0.248009	6	37604569	37604586	18	+
ENSSSCG00000002847	GPT2	6	37625436	37669663	E001	1.57915	0.424677	8.29768	0.040244	1	0.841846	2.70199	1.01034	2.05651	-3.36731	-0.788823	-0.526536	2.05195	6	37625436	37625439	4	-
ENSSSCG00000002847	GPT2	6	37625436	37669663	E002	125.601	0.0275456	9.70176	0.0212791	1	15.3157	17.2898	14.3407	15.7746	-0.374105	-0.28354	0.200735	0.291299	6	37625440	37626278	839	-
ENSSSCG00000002847	GPT2	6	37625436	37669663	E015	52.8715	0.00822681	13.6187	0.00347298	0.766396	10.9831	9.19307	10.5769	10.2569	0.52708	0.323825	0.112077	-0.0911783	6	37657678	37657786	109	-
ENSSSCG00000002849	SHCBP1	6	38029864	38063859	E001	54.9091	0.0115767	9.11593	0.0277886	1	10.5308	11.2231	9.97063	9.22632	-0.189449	-0.580834	0.162084	-0.229301	6	38029864	38030019	156	+
ENSSSCG00000002849	SHCBP1	6	38029864	38063859	E009	101.155	0.00378655	8.32106	0.0398221	1	14.2205	13.2423	13.6541	14.5146	0.215804	0.278069	0.123247	0.185512	6	38048372	38048503	132	+
ENSSSCG00000002852	PLEKHF1	6	39786199	39797583	E004	6.82411	0.211739	9.72176	0.0210855	1	5.18888	3.31902	2.93835	3.41701	1.29542	0.0842026	1.64784	0.436622	6	39787261	39789399	2139	+
ENSSSCG00000002854	POP4	6	39734559	39760953	E004	114.712	0.00577426	10.385	0.0155618	0.985527	15.7175	14.7347	15.2518	14.1431	0.197628	-0.124713	0.092242	-0.230099	6	39738941	39739164	224	+
ENSSSCG00000002857	TDRD12	6	42589556	42665845	E004	12.9029	0.0778271	10.4581	0.0150482	0.979073	5.79188	4.41256	5.9877	4.25434	0.790207	-0.105888	-0.096824	-0.992919	6	42603013	42603132	120	+
ENSSSCG00000002857	TDRD12	6	42589556	42665845	E027	16.9336	0.0338998	8.59726	0.0351537	1	5.64461	6.68716	6.23265	4.9373	-0.493952	-0.883112	-0.288615	-0.677775	6	42664619	42664679	61	+
ENSSSCG00000002857	TDRD12	6	42589556	42665845	E006	9.02906	0.108309	8.12116	0.043573	1	4.95379	3.41885	5.00051	3.6207	1.07496	0.166064	-0.0272616	-0.93616	6	42608332	42608417	86	+
ENSSSCG00000002857	TDRD12	6	42589556	42665845	E005	6.06855	0.154517	8.52907	0.036254	1	4.0418	3.12775	4.21243	2.62151	0.742255	-0.51056	-0.119847	-1.37266	6	42606915	42606970	56	+
ENSSSCG00000002867	CEBPG	6	43164919	43174990	E002	61.106	0.00647495	9.80203	0.0203262	1	11.8554	10.9916	10.5829	10.8144	0.225781	-0.0483702	0.338473	0.0643216	6	43164937	43165119	183	+
ENSSSCG00000002867	CEBPG	6	43164919	43174990	E006	690.71	0.00579722	12.2894	0.00645478	0.884077	32.214	32.9744	33.6421	32.8722	-0.0853041	-0.0113981	-0.15924	-0.0853342	6	43171368	43174987	3620	+
ENSSSCG00000002868	PEPD	6	43177062	43290369	E013	148.684	0.00529576	8.16709	0.0426818	1	17.2189	16.8716	17.9633	16.2473	0.0632632	-0.116604	-0.131966	-0.311834	6	43253960	43254004	45	-
ENSSSCG00000002868	PEPD	6	43177062	43290369	E015	115.588	0.0104087	8.21095	0.0418473	1	15.5003	14.7668	16.0748	14.3088	0.148287	-0.0959508	-0.111852	-0.35609	6	43261784	43261814	31	-
ENSSSCG00000002868	PEPD	6	43177062	43290369	E006	413.039	0.00189939	8.09522	0.0440843	1	26.714	27.0098	26.1597	27.5241	-0.0376263	0.0647611	0.0713275	0.173715	6	43189097	43189245	149	-
ENSSSCG00000002873	GPI	6	44038357	44069328	E007	1172.94	0.0017807	8.36921	0.0389668	1	40.2564	39.4344	40.1338	40.8428	0.08271	0.141232	0.0122831	0.0708054	6	44050726	44050797	72	+
ENSSSCG00000002877	ENSSSCG00000002877	6	44345463	44357772	E005	189.847	0.0161913	9.78746	0.020462	1	19.5197	18.3298	18.3078	19.5555	0.198392	0.204207	0.202166	0.207982	6	44352749	44357772	5024	+
ENSSSCG00000002877	ENSSSCG00000002877	6	44345463	44357772	E005	189.847	0.0161913	9.78746	0.020462	1	19.5197	18.3298	18.3078	19.5555	0.198392	0.204207	0.202166	0.207982	6	44352749	44357772	5024	+
ENSSSCG00000002877	ENSSSCG00000002877	6	44345463	44357772	E004	26.5539	0.0195437	8.8968	0.0306949	1	7.3114	7.71755	7.79643	6.69774	-0.15832	-0.414545	-0.188129	-0.444355	6	44351646	44351741	96	+
ENSSSCG00000002877	ENSSSCG00000002877	6	44345463	44357772	E004	26.5539	0.0195437	8.8968	0.0306949	1	7.3114	7.71755	7.79643	6.69774	-0.15832	-0.414545	-0.188129	-0.444355	6	44351646	44351741	96	+
ENSSSCG00000002884	LSR	6	44759073	44773379	E010	5.89329	0.0902486	11.8044	0.00808408	0.908484	3.35475	2.6341	4.87194	3.10747	0.699439	0.477897	-1.08136	-1.3029	6	44772110	44772241	132	+
ENSSSCG00000002884	LSR	6	44759073	44773379	E008	4.20828	0.248484	11.3853	0.0098148	0.929753	1.87027	2.26491	4.34422	3.1408	-0.553042	0.945162	-2.43758	-0.939376	6	44771646	44771807	162	+
ENSSSCG00000002885	USF2	6	44774008	44783592	E002	138.109	0.0103223	12.1638	0.00684259	0.894728	16.9615	17.3842	15.406	15.3575	-0.076489	-0.382691	0.296557	-0.00964473	6	44774071	44774169	99	+
ENSSSCG00000002885	USF2	6	44774008	44783592	E003	203.88	0.0196292	8.75216	0.0327742	1	20.4604	20.6037	18.3679	18.4928	-0.0223448	-0.342852	0.341784	0.0212773	6	44774170	44774309	140	+
ENSSSCG00000002885	USF2	6	44774008	44783592	E001	63.0229	0.00914155	10.1826	0.0170761	0.992245	11.765	11.9631	10.5537	10.4677	-0.0499517	-0.398046	0.323796	-0.0242988	6	44774008	44774070	63	+
ENSSSCG00000002893	CD22	6	44820689	44834389	E017	31.9242	0.00822909	10.408	0.0153982	0.984866	7.35686	8.63025	8.66094	7.91789	-0.468391	-0.253069	-0.478836	-0.263514	6	44831982	44832057	76	+
ENSSSCG00000002898	LIN37	6	45175500	45181391	E012	1.11889	0.23707	8.25729	0.040983	1	1.61208	0.581236	1.43835	2.09504	2.94433	3.70111	0.329221	1.08601	6	45181383	45181391	9	+
ENSSSCG00000002898	LIN37	6	45175500	45181391	E001	2.55988	0.308282	10.4181	0.0153271	0.984521	3.22414	2.20834	1.73614	1.38936	1.09401	-1.33822	1.78888	-0.643353	6	45175500	45175500	1	+
ENSSSCG00000002907	ENSSSCG00000002907	6	45091895	45102669	E001	277.597	0.00647823	8.78388	0.0323067	1	23.3186	23.1516	21.8412	21.6582	0.0236217	-0.217351	0.213724	-0.0272491	6	45091895	45091932	38	+
ENSSSCG00000002916	APLP1	6	45285718	45295350	E023	2.45589	0.164198	10.8358	0.0126477	0.964555	1.98026	2.92169	2.57678	0.99556	-1.12399	-3.10933	-0.760788	-2.74613	6	45295348	45295350	3	+
ENSSSCG00000002916	APLP1	6	45285718	45295350	E020	35.4526	0.0156352	8.87901	0.0309435	1	8.44702	8.84715	7.58638	9.02879	-0.136179	0.0598774	0.315328	0.511385	6	45294491	45294553	63	+
ENSSSCG00000002916	APLP1	6	45285718	45295350	E014	50.2369	0.00834487	11.5691	0.00901488	0.919103	9.62657	10.5443	10.9332	9.50559	-0.269792	-0.307164	-0.37746	-0.414832	6	45291790	45291918	129	+
ENSSSCG00000002917	NFKBID	6	45298288	45306316	E002	257.76	0.0121343	8.07064	0.0445741	1	21.0424	21.591	20.3502	22.0492	-0.0830105	0.0680649	0.107238	0.258314	6	45298295	45298941	647	-
ENSSSCG00000002921	CLIP3	6	45390659	45405655	E006	52.153	0.0203181	8.98361	0.0295096	1	9.02808	10.6241	10.0938	10.9631	-0.481632	0.0934239	-0.329717	0.245339	6	45395016	45395144	129	-
ENSSSCG00000002935	ENSSSCG00000002935	6	46093210	46121465	E011	3.37086	0.164813	10.2666	0.0164306	0.989735	3.54756	1.97819	2.9841	1.9569	1.6886	-0.0312634	0.500468	-1.2194	6	46119864	46120147	284	-
ENSSSCG00000002937	ENSSSCG00000002937	6	46483651	46530389	E003	2.63487	0.160573	12.192	0.0067536	0.892702	2.65824	2.20389	2.93752	1.29906	0.541673	-1.52638	-0.288857	-2.35691	6	46506704	46506823	120	-
ENSSSCG00000002938	ENSSSCG00000002938	6	46209115	46234917	E008	0.903488	0.517471	9.69837	0.021312	1	2.36099	1.55256	0.616576	0.495827	1.2107	-3.2943	3.87607	-0.628937	6	46229088	46231148	2061	-
ENSSSCG00000002938	ENSSSCG00000002938	6	46209115	46234917	E008	0.903488	0.517471	9.69837	0.021312	1	2.36099	1.55256	0.616576	0.495827	1.2107	-3.2943	3.87607	-0.628937	6	46229088	46231148	2061	-
ENSSSCG00000002952	YIF1B	6	47224345	47234480	E006	367.868	0.00159599	13.9648	0.00295348	0.760496	26.2801	25.1455	25.4466	25.1008	0.148918	-0.00597127	0.108929	-0.0459605	6	47227427	47227531	105	-
ENSSSCG00000002954	SPINT2	6	47181768	47210559	E001	7.91763	0.056145	12.4237	0.00606411	0.865938	4.50856	3.37589	5.09604	3.30125	0.838219	-0.0646946	-0.355575	-1.25849	6	47181768	47181788	21	+
ENSSSCG00000002955	CATSPERG	6	47251964	47282829	E016	0.83565	0.337348	8.37972	0.0387824	1	0.933811	2.1767	0.0166567	1.19335	-2.44335	-1.73551	11.6183	12.3261	6	47273400	47273613	214	+
ENSSSCG00000002955	CATSPERG	6	47251964	47282829	E008	1.74786	0.33666	7.86385	0.0489109	1	1.20082	1.9009	0.985217	2.70411	-1.32614	1.01837	0.571199	2.91571	6	47263636	47263807	172	+
ENSSSCG00000002955	CATSPERG	6	47251964	47282829	E023	10.6936	0.0635395	13.12	0.0043842	0.811989	4.6912	3.60288	5.834	4.70416	0.765059	0.773066	-0.633656	-0.625649	6	47279708	47279864	157	+
ENSSSCG00000002960	RASGRP4	6	47319464	47333123	E008	2.04117	0.16134	8.73658	0.0330061	1	1.83996	2.56701	1.24231	0.973628	-0.962058	-2.79945	1.13401	-0.703382	6	47321581	47321642	62	-
ENSSSCG00000002962	MAP4K1	6	47458541	47475815	E035	81.5087	0.0105302	8.04636	0.0450633	1	13.4844	11.8626	12.6182	12.6277	0.385343	0.187458	0.200141	0.00225606	6	47473673	47473737	65	-
ENSSSCG00000002962	MAP4K1	6	47458541	47475815	E013	106.582	0.00341364	9.82488	0.0201149	1	13.9933	14.4349	15.4957	14.0904	-0.0943982	-0.0734073	-0.311027	-0.290036	6	47463858	47463966	109	-
ENSSSCG00000002962	MAP4K1	6	47458541	47475815	E033	60.0778	0.00937695	8.62585	0.0347021	1	11.3763	10.0227	10.7888	11.5453	0.376548	0.420565	0.15796	0.201977	6	47471611	47471658	48	-
ENSSSCG00000002962	MAP4K1	6	47458541	47475815	E034	70.6768	0.0187763	8.65494	0.0342486	1	12.6012	10.7126	11.9132	12.0224	0.485236	0.344153	0.168417	0.0273335	6	47471743	47471798	56	-
ENSSSCG00000002965	ACTN4	6	47493919	47565998	E022	848.033	0.00102149	9.79282	0.0204119	1	35.5911	35.0839	36.1374	36.2538	0.0543003	0.124616	-0.0580187	0.0122968	6	47560096	47560236	141	+
ENSSSCG00000002965	ACTN4	6	47493919	47565998	E032	1188.94	0.00450001	8.59502	0.0351893	1	39.8421	41.5707	39.4241	40.786	-0.172191	-0.0777397	0.0421717	0.136623	6	47565087	47565993	907	+
ENSSSCG00000002965	ACTN4	6	47493919	47565998	E007	915.332	0.00140935	14.839	0.00195958	0.710137	37.636	35.9232	36.797	36.9155	0.179475	0.104517	0.0873589	0.0124008	6	47539658	47539772	115	+
ENSSSCG00000002965	ACTN4	6	47493919	47565998	E030	892.691	0.00123496	12.9492	0.00474767	0.824869	35.719	37.1902	36.0357	36.7974	-0.15489	-0.0410335	-0.0336258	0.0802311	6	47564760	47565007	248	+
ENSSSCG00000002965	ACTN4	6	47493919	47565998	E004	876.69	0.00149075	9.14107	0.0274729	1	36.7987	35.6301	36.6931	35.8734	0.123466	0.0258887	0.0110738	-0.0865036	6	47539372	47539486	115	+
ENSSSCG00000002965	ACTN4	6	47493919	47565998	E006	462.451	0.00215468	12.8488	0.00497525	0.82965	28.5172	27.002	28.3767	28.4342	0.188497	0.17835	0.0171966	0.00704973	6	47539653	47539657	5	+
ENSSSCG00000002972	SARS2	6	47716679	47728310	E004	1.35127	0.415442	9.82247	0.020137	1	1.71973	2.56939	1.1853	0.557679	-1.15987	-4.41024	1.07446	-2.17591	6	47718192	47718233	42	-
ENSSSCG00000002990	CCNP	6	48550543	48552178	E002	2.64453	1.10709	8.4992	0.0367464	1	1.83951	1.43909	2.4531	3.22533	0.708842	2.33177	-0.831576	0.791355	6	48550631	48550795	165	-
ENSSSCG00000002994	CYP2F1	6	49017008	49029388	E004	0.842638	0.552986	9.50984	0.0232269	1	0.972009	0.0107905	2.36992	0.645765	12.9866	11.8065	-2.57339	-3.75351	6	49020965	49021106	142	-
ENSSSCG00000003000	ITPKC	6	48943357	48961438	E008	423.636	0.00468792	16.8173	0.000770579	0.588904	25.3178	27.0684	26.2394	26.7138	-0.226807	-0.0450837	-0.120744	0.0609796	6	48960458	48961438	981	+
ENSSSCG00000003000	ITPKC	6	48943357	48961438	E001	312.788	0.00333252	8.95427	0.0299051	1	24.2566	23.0057	23.4107	22.7703	0.174748	-0.0336933	0.11741	-0.0910314	6	48943357	48944514	1158	+
ENSSSCG00000003017	TGFB1	6	49332173	49349046	E004	1094.62	0.000817564	7.8243	0.049786	1	38.8855	39.4257	38.8086	38.8348	-0.0548166	-0.0599787	0.00782867	0.00266663	6	49340039	49340116	78	-
ENSSSCG00000003017	TGFB1	6	49332173	49349046	E007	3776.06	0.00358029	9.94298	0.0190571	1	59.5087	57.1371	58.204	58.3278	0.207992	0.104683	0.114167	0.0108576	6	49347844	49349046	1203	-
ENSSSCG00000003018	LIPE	6	49540708	49560125	E008	63.2566	0.00579434	8.43003	0.037912	1	11.1108	11.0204	11.347	12.2949	0.0243213	0.327035	-0.0627172	0.239996	6	49555704	49555931	228	+
ENSSSCG00000003030	CIC	6	49638990	49662947	E011	186.117	0.00328877	8.1846	0.0423468	1	18.7926	18.0099	19.3393	19.1063	0.133589	0.18581	-0.0905676	-0.0383469	6	49643050	49643237	188	-
ENSSSCG00000003030	CIC	6	49638990	49662947	E004	252.555	0.00192856	12.9995	0.00463777	0.820318	21.2341	22.4085	20.5605	21.3385	-0.174465	-0.158652	0.103558	0.119371	6	49640522	49640653	132	-
ENSSSCG00000003035	GSK3A	6	49690370	49701189	E012	0.989162	0.333527	7.90469	0.0480231	1	1.77257	1.79496	1.1845	0.0223002	-0.0362429	-12.6627	1.16379	-11.4627	6	49699094	49699137	44	+
ENSSSCG00000003038	GRIK5	6	49845656	49902080	E017	6.43739	0.0454594	9.7964	0.0203785	1	3.39605	3.718	2.64355	4.31443	-0.262218	0.431116	0.724498	1.41783	6	49893422	49893647	226	+
ENSSSCG00000003038	GRIK5	6	49845656	49902080	E016	5.21458	0.0871023	9.30561	0.0254918	1	2.5351	3.65524	2.56874	3.85568	-1.05849	0.15462	-0.0380931	1.17502	6	49892709	49892874	166	+
ENSSSCG00000003038	GRIK5	6	49845656	49902080	E015	4.78284	0.103429	9.85428	0.0198463	1	1.88622	3.59612	3.07327	3.4879	-1.86548	-0.0884648	-1.41081	0.366206	6	49881406	49881579	174	+
ENSSSCG00000003038	GRIK5	6	49845656	49902080	E010	6.37414	0.0930782	12.9936	0.00465053	0.820318	3.46792	3.50409	5.04899	2.69077	-0.0300354	-0.763964	-1.089	-1.82293	6	49858264	49858368	105	+
ENSSSCG00000003038	GRIK5	6	49845656	49902080	E008	7.58681	0.123985	10.2192	0.0167922	0.992103	4.8174	2.63247	4.40189	3.72954	1.7499	1.00783	0.261722	-0.480342	6	49856131	49856292	162	+
ENSSSCG00000003042	RPS19	6	50000948	50010341	E002	5177.41	0.000840992	7.8682	0.0488157	1	63.1574	64.0562	63.5135	63.5511	-0.0773199	-0.0434238	-0.0306589	0.00323719	6	50003237	50003263	27	-
ENSSSCG00000003055	XRCC1	6	50403689	50425729	E008	95.5414	0.00661809	8.54675	0.0359655	1	14.3427	13.9137	12.7242	13.7164	0.0921973	-0.043279	0.362075	0.226599	6	50406447	50406579	133	-
ENSSSCG00000003055	XRCC1	6	50403689	50425729	E012	64.0223	0.0110936	11.3171	0.0101293	0.929753	11.2432	12.059	12.0506	10.2836	-0.209329	-0.474616	-0.207241	-0.472529	6	50410191	50410302	112	-
ENSSSCG00000003062	LYPD3	6	50341161	50345338	E005	5.5575	0.219066	11.5675	0.00902163	0.919103	4.14056	2.60353	2.30978	3.89722	1.34268	1.16717	1.68866	1.51315	6	50345055	50345338	284	-
ENSSSCG00000003069	KCNN4	6	50580022	50593544	E002	24.175	0.019446	10.4486	0.015114	0.979073	7.40801	6.09782	6.86275	7.61607	0.568339	0.649454	0.223567	0.304682	6	50580845	50581012	168	-
ENSSSCG00000003069	KCNN4	6	50580022	50593544	E003	16.8949	0.0423926	10.2817	0.016317	0.987685	5.87149	4.96032	5.69693	6.96157	0.490358	0.987071	0.087858	0.584572	6	50582250	50582319	70	-
ENSSSCG00000003070	ZNF45	6	50746659	50759572	E006	205.05	0.0165353	8.32213	0.0398028	1	19.687	18.676	20.833	19.3783	0.166673	0.116548	-0.18065	-0.230775	6	50756437	50759572	3136	+
ENSSSCG00000003072	ENSSSCG00000003072	6	50660723	50679790	E004	311.632	0.00723817	7.84183	0.0493962	1	23.1897	24.009	23.8449	23.7384	-0.114569	-0.0375095	-0.0918613	-0.0148019	6	50675349	50679790	4442	+
ENSSSCG00000003076	ENSSSCG00000003076	6	50793034	50802285	E005	4.3384	0.0966024	10.0258	0.0183479	1	1.84125	3.31662	2.98239	3.33842	-1.70098	0.0189552	-1.39368	0.326247	6	50802164	50802204	41	+
ENSSSCG00000003076	ENSSSCG00000003076	6	50793034	50802285	E005	4.3384	0.0966024	10.0258	0.0183479	1	1.84125	3.31662	2.98239	3.33842	-1.70098	0.0189552	-1.39368	0.326247	6	50802164	50802204	41	+
ENSSSCG00000003079	ENSSSCG00000003079	6	51161383	51178451	E008	92.1122	0.00476503	8.14288	0.0431493	1	14.0438	13.4679	13.2954	13.1918	0.12681	-0.0625758	0.165764	-0.0236225	6	51169607	51169724	118	+
ENSSSCG00000003079	ENSSSCG00000003079	6	51161383	51178451	E010	82.4756	0.0048734	11.9079	0.00770547	0.900022	13.4825	12.2406	13.2908	12.5301	0.290942	0.0701545	0.0432671	-0.177521	6	51173577	51173702	126	+
ENSSSCG00000003085	CLPTM1	6	51413602	51441816	E017	172.232	0.00403262	15.7641	0.00126754	0.67967	16.9585	18.9527	17.9358	18.5103	-0.347755	-0.0743789	-0.174516	0.0988602	6	51441121	51441121	1	+
ENSSSCG00000003085	CLPTM1	6	51413602	51441816	E008	353.724	0.00307663	10.1014	0.0177236	0.99904	26.0344	24.4893	25.2862	24.4886	0.205452	-9.5921e-05	0.0983567	-0.107191	6	51435092	51435212	121	+
ENSSSCG00000003085	CLPTM1	6	51413602	51441816	E016	216.903	0.00255758	9.48149	0.0235291	1	19.4183	20.8521	19.9945	20.2877	-0.227179	-0.0878621	-0.0928828	0.0464339	6	51441087	51441120	34	+
ENSSSCG00000003085	CLPTM1	6	51413602	51441816	E018	192.846	0.00251119	15.7578	0.00127129	0.67967	18.1673	19.9349	18.7113	19.3827	-0.293195	-0.0891939	-0.0926795	0.111322	6	51441122	51441146	25	+
ENSSSCG00000003085	CLPTM1	6	51413602	51441816	E019	187.676	0.00506007	11.0637	0.0113866	0.946559	17.8433	19.6225	18.5542	19.1591	-0.2993	-0.0757075	-0.122448	0.101144	6	51441147	51441181	35	+
ENSSSCG00000003085	CLPTM1	6	51413602	51441816	E009	458.815	0.00256462	8.07872	0.0444126	1	28.9201	27.6943	27.5353	27.6512	0.150462	-0.00537135	0.17031	0.0144761	6	51435943	51436187	245	+
ENSSSCG00000003089	TOMM40	6	51359595	51369908	E008	293.936	0.00350215	8.45192	0.0375393	1	23.573	23.7112	22.3118	22.6338	-0.019304	-0.152775	0.180209	0.0467376	6	51360163	51360313	151	+
ENSSSCG00000003090	ENSSSCG00000003090	6	51313459	51358652	E014	3.74677	0.267942	8.55396	0.0358484	1	3.80038	2.19397	3.31319	1.89598	1.58889	-0.421666	0.397168	-1.61338	6	51349528	51350823	1296	+
ENSSSCG00000003093	SYMPK	6	52138204	52199220	E001	3.15282	0.192783	9.86397	0.0197586	1	1.49143	3.13088	2.73113	2.59487	-2.14265	-0.542986	-1.74761	-0.147947	6	52138204	52138438	235	-
ENSSSCG00000003093	SYMPK	6	52138204	52199220	E021	79.5613	0.00616686	12.8006	0.00508817	0.830579	12.5133	11.4764	13.6012	13.0675	0.259023	0.389438	-0.251318	-0.120902	6	52165864	52166034	171	-
ENSSSCG00000003093	SYMPK	6	52138204	52199220	E024	5.68329	0.0587013	11.6862	0.0085391	0.913257	2.4613	3.3571	3.62419	4.25313	-0.897588	0.685227	-1.11919	0.463628	6	52171380	52172129	750	-
ENSSSCG00000003100	CCDC61	6	52294535	52318003	E003	176.953	0.0169941	11.9546	0.00754045	0.898743	18.2661	17.3407	19.1416	18.9261	0.162414	0.274056	-0.147397	-0.0357551	6	52303166	52303324	159	+
ENSSSCG00000003106	AP2S1	6	52695640	52703278	E001	1337.61	0.00125262	14.738	0.00205485	0.712026	41.5309	42.9424	41.5459	42.2314	-0.138265	-0.0693873	-0.00148144	0.0673964	6	52695640	52696036	397	-
ENSSSCG00000003106	AP2S1	6	52695640	52703278	E009	530.9	0.00180876	9.58279	0.0224667	1	30.4014	29.7361	29.3337	29.0635	0.0784735	-0.0804935	0.126481	-0.0324864	6	52703042	52703198	157	-
ENSSSCG00000003108	NPAS1	6	52845207	52875240	E011	1.55219	0.4203	8.59333	0.0352162	1	0.00961675	1.61677	1.80037	2.2262	-14.7877	0.923836	-15.0983	0.613242	6	52870911	52871068	158	+
ENSSSCG00000003108	NPAS1	6	52845207	52875240	E016	16.8342	0.0838225	18.5547	0.000337927	0.493219	7.20617	5.41279	5.9093	5.02223	0.834364	-0.217644	0.578984	-0.473025	6	52874163	52875240	1078	+
ENSSSCG00000003110	ZC3H4	6	52894951	52938164	E006	55.2764	0.0344272	8.32642	0.0397259	1	11.0783	11.0336	10.7635	9.39257	0.0120442	-0.477371	0.0857734	-0.403642	6	52911719	52911828	110	-
ENSSSCG00000003110	ZC3H4	6	52894951	52938164	E023	8.02177	0.0671394	8.79481	0.0321472	1	4.55641	4.70563	3.51261	3.20159	-0.0935063	-1.11574	0.753933	-0.268305	6	52936723	52936960	238	-
ENSSSCG00000003110	ZC3H4	6	52894951	52938164	E024	3.32791	0.0943526	8.27027	0.0407441	1	3.0737	3.04358	2.25695	1.72413	0.0284821	-1.64221	0.89286	-0.777835	6	52936961	52936965	5	-
ENSSSCG00000003112	BBC3	6	53037104	53046887	E001	243.458	0.0084562	8.83532	0.0315624	1	20.799	21.9922	20.7313	21.332	-0.180032	-0.0986235	0.0104661	0.0918749	6	53037104	53038204	1101	-
ENSSSCG00000003114	DHX34	6	53131241	53161368	E004	52.2556	0.0271965	8.41405	0.0381865	1	10.5849	9.3673	9.39028	11.2529	0.361847	0.543979	0.354613	0.536744	6	53138579	53138890	312	+
ENSSSCG00000003115	MEIS3	6	53175928	53188406	E010	73.8783	0.0080585	9.71558	0.0211451	1	12.2102	11.6965	13.3217	11.7928	0.128684	0.0245253	-0.262156	-0.366315	6	53184533	53184583	51	-
ENSSSCG00000003115	MEIS3	6	53175928	53188406	E011	79.4309	0.00622778	8.42565	0.0379871	1	12.5058	12.1654	13.6593	12.3816	0.0828112	0.0528388	-0.266013	-0.295985	6	53185858	53185908	51	-
ENSSSCG00000003128	LIG1	6	53620483	53686562	E005	128.612	0.00567585	12.0628	0.00717109	0.898743	14.5547	15.8237	16.1944	16.696	-0.255788	0.165524	-0.327083	0.0942294	6	53623479	53623532	54	-
ENSSSCG00000003128	LIG1	6	53620483	53686562	E009	177.552	0.00484722	17.6582	0.000517336	0.518617	17.9057	19.3862	16.9613	18.2093	-0.24996	-0.197321	0.168758	0.221397	6	53626722	53626866	145	-
ENSSSCG00000003128	LIG1	6	53620483	53686562	E004	164.44	0.0065577	11.7854	0.00815556	0.908484	16.2553	18.0163	18.0255	18.5982	-0.319544	0.0997329	-0.321128	0.0981482	6	53622682	53622825	144	-
ENSSSCG00000003128	LIG1	6	53620483	53686562	E010	145.324	0.00417088	8.93685	0.0301425	1	16.4603	17.316	15.6883	16.7244	-0.157126	-0.107895	0.147976	0.197208	6	53627235	53627306	72	-
ENSSSCG00000003128	LIG1	6	53620483	53686562	E014	132.934	0.00385919	13.2179	0.0041884	0.800674	16.3187	16.4278	16.0261	14.6603	-0.0205789	-0.349212	0.0557827	-0.272851	6	53631624	53631709	86	-
ENSSSCG00000003134	GRWD1	6	53849852	53859385	E003	131.208	0.00267253	10.6521	0.0137638	0.968875	15.705	15.4121	16.7846	16.0365	0.0577621	0.122004	-0.205066	-0.140824	6	53850636	53850795	160	+
ENSSSCG00000003147	CA11	6	53993394	53999172	E008	2.56987	0.13225	8.96664	0.0297378	1	2.01737	1.15922	2.59222	2.4551	1.59969	2.16705	-0.724443	-0.157076	6	53998390	53998464	75	-
ENSSSCG00000003152	RUVBL2	6	54250515	54266893	E025	16.5916	0.105401	21.1847	9.63743e-05	0.307831	5.28949	8.2893	4.11597	3.55298	-1.31179	-2.46586	0.728013	-0.426054	6	54263488	54265155	1668	+
ENSSSCG00000003154	GYS1	6	54233050	54250261	E005	83.5789	0.0124335	10.7978	0.0128712	0.968057	11.3448	13.563	13.3836	12.6838	-0.536246	-0.202133	-0.495991	-0.161878	6	54233294	54234096	803	-
ENSSSCG00000003154	GYS1	6	54233050	54250261	E004	32.8825	0.0318217	8.64938	0.0343347	1	6.72543	9.09602	8.36221	7.95188	-0.885527	-0.395316	-0.63794	-0.147729	6	54233053	54233293	241	-
ENSSSCG00000003154	GYS1	6	54233050	54250261	E024	98.393	0.0150706	9.95739	0.0189318	1	14.4104	13.5876	14.9761	12.6407	0.178354	-0.217861	-0.117408	-0.513623	6	54249948	54250260	313	-
ENSSSCG00000003168	ALDH16A1	6	54529468	54548144	E014	217.238	0.00226875	16.2033	0.0010302	0.63531	20.6426	20.8003	19.2491	19.4936	-0.0244031	-0.206941	0.22251	0.0399724	6	54540565	54540732	168	+
ENSSSCG00000003170	SLC17A7	6	54511124	54521611	E017	1.25166	0.326726	8.35421	0.0392313	1	2.46789	1.43287	0.638118	1.59373	1.57028	0.307184	3.90494	2.64184	6	54521400	54521445	46	-
ENSSSCG00000003170	SLC17A7	6	54511124	54521611	E015	3.46712	0.107324	15.7729	0.00126228	0.67967	2.44843	3.73711	1.69011	2.18735	-1.22318	-1.54899	1.07068	0.744861	6	54515975	54516093	119	-
ENSSSCG00000003178	IRF3	6	54701668	54707151	E001	39.6964	0.0203002	8.23464	0.0414034	1	8.92209	9.4748	7.79143	9.32161	-0.1773	-0.0481288	0.398196	0.527367	6	54701668	54701715	48	-
ENSSSCG00000003189	PRMT1	6	54714157	54732574	E020	59.4992	0.0625063	9.6395	0.0218927	1	12.6434	11.2118	10.5204	9.32291	0.359719	-0.547085	0.549096	-0.357707	6	54730409	54731556	1148	+
ENSSSCG00000003189	PRMT1	6	54714157	54732574	E021	26.4542	0.0881187	13.2251	0.0041742	0.800674	7.59171	9.23358	6.07148	5.9704	-0.575462	-1.27705	0.652687	-0.0489023	6	54731900	54732122	223	+
ENSSSCG00000003193	TBC1D17	6	54890019	54906144	E005	1.61526	0.165081	9.08611	0.0281676	1	1.71994	2.42923	2.06636	0.939815	-0.997414	-2.74202	-0.529982	-2.27459	6	54891459	54891592	134	+
ENSSSCG00000003193	TBC1D17	6	54890019	54906144	E001	2.53918	0.123665	8.14545	0.0430994	1	2.63813	2.88896	1.44674	2.00609	-0.262604	-1.05398	1.73528	0.943901	6	54890019	54890087	69	+
ENSSSCG00000003193	TBC1D17	6	54890019	54906144	E009	100.544	0.0105375	8.21264	0.0418155	1	13.2348	14.0471	15.1991	13.9365	-0.180261	-0.0239904	-0.42043	-0.264159	6	54897632	54897755	124	+
ENSSSCG00000003194	AKT1S1	6	54881588	54890641	E006	16.0932	0.162995	8.29323	0.0403248	1	6.47632	6.7965	5.27681	4.23655	-0.140857	-1.37459	0.596402	-0.637334	6	54890569	54890641	73	-
ENSSSCG00000003195	PNKP	6	54867637	54881088	E016	50.2372	0.0165742	15.4072	0.00149972	0.697804	10.3958	11.0558	9.69731	8.44302	-0.182975	-0.797343	0.206045	-0.408323	6	54875623	54875654	32	-
ENSSSCG00000003197	MED25	6	54834316	54852821	E002	139.253	0.00470765	7.83148	0.049626	1	16.4799	16.9796	16.6891	15.573	-0.0924936	-0.266792	-0.0390271	-0.213326	6	54834322	54834514	193	+
ENSSSCG00000003198	FUZ	6	54823668	54829506	E011	14.5401	0.0540087	8.6303	0.0346323	1	6.07474	5.03442	4.42911	5.91334	0.546411	0.467972	0.918218	0.839779	6	54828819	54828917	99	-
ENSSSCG00000003199	AP2A1	6	54786511	54823904	E003	184.279	0.00481343	8.06274	0.0447326	1	19.3377	18.4466	17.7528	19.1917	0.148781	0.1248	0.268853	0.244872	6	54801799	54801867	69	+
ENSSSCG00000003199	AP2A1	6	54786511	54823904	E037	338.08	0.00278755	14.5285	0.00226734	0.722386	23.5909	25.6044	24.3281	24.5808	-0.273071	-0.136752	-0.101922	0.0343974	6	54822999	54823133	135	+
ENSSSCG00000003201	ATF5	6	54945119	54950137	E001	15.5513	0.0328853	10.6337	0.0138808	0.969521	4.74024	6.09936	5.48904	6.15642	-0.733023	0.027136	-0.426114	0.334044	6	54945119	54945154	36	+
ENSSSCG00000003211	NR1H2	6	55239500	55245456	E005	333.246	0.00203465	10.5894	0.0141663	0.973906	23.8604	23.9876	25.3252	24.3811	-0.0175942	0.0540166	-0.19863	-0.127019	6	55240903	55241082	180	+
ENSSSCG00000003214	KCNC3	6	55204101	55217074	E005	6.2979	0.147793	12.4737	0.00592472	0.861197	2.96853	4.4193	3.70944	3.28345	-1.15224	-0.860556	-0.644805	-0.353117	6	55210387	55211494	1108	-
ENSSSCG00000003216	POLD1	6	55247880	55272085	E013	66.7415	0.0122976	16.2697	0.000998374	0.625866	12.7676	10.6666	10.7977	11.5027	0.537491	0.224797	0.501161	0.188466	6	55262662	55262730	69	+
ENSSSCG00000003216	POLD1	6	55247880	55272085	E014	90.8689	0.00561934	15.4921	0.00144096	0.69037	14.3421	13.3461	12.4098	12.7945	0.218117	-0.127264	0.43715	0.0917688	6	55262731	55262802	72	+
ENSSSCG00000003216	POLD1	6	55247880	55272085	E015	97.8728	0.00576627	7.83773	0.0494872	1	14.4395	14.0725	13.1112	13.3713	0.0782325	-0.154785	0.292302	0.0592846	6	55262893	55263003	111	+
ENSSSCG00000003218	MYBPC2	6	55281803	55310295	E039	1.91911	0.236864	9.16553	0.0271692	1	3.0417	1.22591	2.08653	1.28261	2.62503	0.130516	1.08943	-1.40509	6	55308802	55308812	11	+
ENSSSCG00000003229	ETFB	6	58501811	58517579	E013	4.14389	0.0612708	10.9153	0.0121929	0.959503	2.19297	2.70239	3.98373	2.76465	-0.603652	0.0658598	-1.7267	-1.05719	6	58517579	58517579	1	+
ENSSSCG00000003233	ZNF175	6	58408885	58419435	E002	28.3745	0.0236618	10.9399	0.0120551	0.958178	7.13129	8.50047	7.95939	6.99945	-0.514922	-0.569478	-0.321756	-0.376311	6	58408923	58410340	1418	-
ENSSSCG00000003251	NLRP12	6	56402665	56425101	E003	63.0923	0.0363752	9.28757	0.0257021	1	9.13699	10.2914	9.6464	10.9712	-0.351833	0.190066	-0.160187	0.381713	6	56408956	56410648	1693	+
ENSSSCG00000003255	CACNG8	6	56156205	56175002	E001	6.30373	0.114622	9.85845	0.0198085	1	3.0094	3.38998	2.92875	4.8968	-0.344536	1.0659	0.078562	1.48899	6	56156205	56157659	1455	-
ENSSSCG00000003263	PRPF31	6	55995091	56011441	E011	188.147	0.00185441	8.46397	0.0373357	1	19.2108	19.0636	18.0151	19.1088	0.0242948	0.00747863	0.202138	0.185321	6	55997502	55997573	72	-
ENSSSCG00000003267	MBOAT7	6	55939451	55955736	E007	390.874	0.00150544	12.853	0.00496542	0.82965	25.1198	26.5082	25.1565	25.244	-0.181739	-0.165193	-0.00489222	0.0116543	6	55949138	55949314	177	+
ENSSSCG00000003271	TTYH1	6	58871665	58891519	E012	1.11957	0.507607	8.05305	0.044928	1	2.08665	1.9402	1.00002	0.0187097	0.210192	-13.394	2.12361	-11.4806	6	58882090	58882185	96	-
ENSSSCG00000003272	ENSSSCG00000003272	6	58803936	58808473	E001	21.1813	0.0348772	10.7378	0.0132314	0.968437	7.6037	6.333	6.05943	6.31635	0.534385	-0.00767557	0.663095	0.121035	6	58803936	58804827	892	-
ENSSSCG00000003272	ENSSSCG00000003272	6	58803936	58808473	E001	21.1813	0.0348772	10.7378	0.0132314	0.968437	7.6037	6.333	6.05943	6.31635	0.534385	-0.00767557	0.663095	0.121035	6	58803936	58804827	892	-
ENSSSCG00000003272	ENSSSCG00000003272	6	58803936	58808473	E001	21.1813	0.0348772	10.7378	0.0132314	0.968437	7.6037	6.333	6.05943	6.31635	0.534385	-0.00767557	0.663095	0.121035	6	58803936	58804827	892	-
ENSSSCG00000003272	ENSSSCG00000003272	6	58803936	58808473	E001	21.1813	0.0348772	10.7378	0.0132314	0.968437	7.6037	6.333	6.05943	6.31635	0.534385	-0.00767557	0.663095	0.121035	6	58803936	58804827	892	-
ENSSSCG00000003272	ENSSSCG00000003272	6	58803936	58808473	E001	21.1813	0.0348772	10.7378	0.0132314	0.968437	7.6037	6.333	6.05943	6.31635	0.534385	-0.00767557	0.663095	0.121035	6	58803936	58804827	892	-
ENSSSCG00000003272	ENSSSCG00000003272	6	58803936	58808473	E001	21.1813	0.0348772	10.7378	0.0132314	0.968437	7.6037	6.333	6.05943	6.31635	0.534385	-0.00767557	0.663095	0.121035	6	58803936	58804827	892	-
ENSSSCG00000003282	ENSSSCG00000003282	AEMK02000479.1	30222	38764	E005	24.5104	0.0698905	8.22484	0.0415865	1	7.09714	7.41947	6.90165	5.27452	-0.129943	-0.994951	0.0816381	-0.78337	AEMK02000479.1	31111	31413	303	+
ENSSSCG00000003282	ENSSSCG00000003282	AEMK02000479.1	30222	38764	E005	24.5104	0.0698905	8.22484	0.0415865	1	7.09714	7.41947	6.90165	5.27452	-0.129943	-0.994951	0.0816381	-0.78337	AEMK02000479.1	31111	31413	303	+
ENSSSCG00000003282	ENSSSCG00000003282	AEMK02000479.1	30222	38764	E005	24.5104	0.0698905	8.22484	0.0415865	1	7.09714	7.41947	6.90165	5.27452	-0.129943	-0.994951	0.0816381	-0.78337	AEMK02000479.1	31111	31413	303	+
ENSSSCG00000003282	ENSSSCG00000003282	AEMK02000479.1	30222	38764	E005	24.5104	0.0698905	8.22484	0.0415865	1	7.09714	7.41947	6.90165	5.27452	-0.129943	-0.994951	0.0816381	-0.78337	AEMK02000479.1	31111	31413	303	+
ENSSSCG00000003282	ENSSSCG00000003282	AEMK02000479.1	30222	38764	E005	24.5104	0.0698905	8.22484	0.0415865	1	7.09714	7.41947	6.90165	5.27452	-0.129943	-0.994951	0.0816381	-0.78337	AEMK02000479.1	31111	31413	303	+
ENSSSCG00000003282	ENSSSCG00000003282	AEMK02000479.1	30222	38764	E005	24.5104	0.0698905	8.22484	0.0415865	1	7.09714	7.41947	6.90165	5.27452	-0.129943	-0.994951	0.0816381	-0.78337	AEMK02000479.1	31111	31413	303	+
ENSSSCG00000003301	PPP6R1	6	59427572	59450109	E011	15.4138	0.0813163	9.36247	0.0248404	1	6.47464	5.24832	6.05114	4.50857	0.611378	-0.441133	0.19721	-0.855301	6	59431427	59431440	14	-
ENSSSCG00000003301	PPP6R1	6	59427572	59450109	E026	263.053	0.00320291	7.85783	0.0490432	1	22.2737	21.5765	21.2096	22.5829	0.103173	0.148128	0.158529	0.203484	6	59437720	59437832	113	-
ENSSSCG00000003306	HELZ2	6	59919847	59932546	E009	3.76092	0.314039	9.68428	0.0214496	1	1.81402	1.90216	2.30236	2.85493	-0.137012	1.17337	-0.688614	0.621771	6	59925058	59928616	3559	+
ENSSSCG00000003329	ACAP3	6	63579304	63593435	E003	56.2533	0.01637	15.0989	0.00173402	0.710137	9.45292	11.8173	10.7981	10.3785	-0.663276	-0.386763	-0.394258	-0.117745	6	63579310	63579766	457	-
ENSSSCG00000003329	ACAP3	6	63579304	63593435	E013	37.3584	0.0355066	8.0014	0.0459828	1	8.88838	8.15092	7.81887	9.83162	0.254704	0.552448	0.376732	0.674476	6	63583414	63583508	95	-
ENSSSCG00000003332	SDF4	6	63529853	63544944	E005	2034.54	0.000500088	13.7663	0.00324119	0.764246	47.956	48.8009	48.1628	48.8522	-0.0783849	0.00474498	-0.0192375	0.0638924	6	63531079	63531254	176	-
ENSSSCG00000003333	C1QTNF12	6	63548864	63553332	E004	6.94502	0.0735677	11.2022	0.0106812	0.939015	3.78992	4.4479	2.56938	3.92603	-0.463983	-0.361776	1.12447	1.22667	6	63549753	63549861	109	-
ENSSSCG00000003334	UBE2J2	6	63555488	63568017	E002	210.362	0.00274876	9.44118	0.0239655	1	19.5191	20.6252	18.9011	19.8749	-0.175684	-0.118296	0.101741	0.159129	6	63557493	63557573	81	-
ENSSSCG00000003334	UBE2J2	6	63555488	63568017	E004	253.228	0.00270897	9.42712	0.0241194	1	22.0835	21.0649	21.7484	21.3289	0.152674	0.0401248	0.0496018	-0.0629476	6	63558117	63558219	103	-
ENSSSCG00000003334	UBE2J2	6	63555488	63568017	E008	8.45019	0.0354957	8.06676	0.0446519	1	4.17695	3.59367	5.09864	3.92008	0.435718	0.251787	-0.578592	-0.762524	6	63564141	63564162	22	-
ENSSSCG00000003348	ENSSSCG00000003348	6	63728328	63755161	E004	431.199	0.00212976	9.64864	0.0218016	1	27.8576	26.6479	27.4882	26.9651	0.152395	0.040421	0.0460387	-0.065935	6	63744165	63744308	144	-
ENSSSCG00000003350	MIB2	6	63787201	63800423	E007	141.668	0.00861215	9.51741	0.0231469	1	17.3913	15.4378	16.8878	16.8331	0.368012	0.266678	0.0912769	-0.0100567	6	63794400	63794571	172	+
ENSSSCG00000003350	MIB2	6	63787201	63800423	E020	178.477	0.00355538	14.6031	0.00218921	0.722386	18.942	19.0334	17.15	18.1672	-0.015185	-0.146505	0.311091	0.179771	6	63799343	63799521	179	+
ENSSSCG00000003350	MIB2	6	63787201	63800423	E024	2.30449	0.178621	7.97313	0.0465704	1	1.90063	1.38823	2.34655	2.9387	0.907092	2.16642	-0.608857	0.650473	6	63800423	63800423	1	+
ENSSSCG00000003352	ENSSSCG00000003352	6	63804208	63819902	E006	182.473	0.00788161	9.54114	0.0228977	1	18.2158	19.9287	18.5873	17.929	-0.283852	-0.333555	-0.0633887	-0.113092	6	63805648	63805796	149	-
ENSSSCG00000003352	ENSSSCG00000003352	6	63804208	63819902	E006	182.473	0.00788161	9.54114	0.0228977	1	18.2158	19.9287	18.5873	17.929	-0.283852	-0.333555	-0.0633887	-0.113092	6	63805648	63805796	149	-
ENSSSCG00000003352	ENSSSCG00000003352	6	63804208	63819902	E025	5.96676	0.0601998	13.4559	0.00374761	0.787267	4.55446	2.58847	3.17049	3.39686	1.63573	0.786055	1.04924	0.199567	6	63819877	63819902	26	-
ENSSSCG00000003352	ENSSSCG00000003352	6	63804208	63819902	E025	5.96676	0.0601998	13.4559	0.00374761	0.787267	4.55446	2.58847	3.17049	3.39686	1.63573	0.786055	1.04924	0.199567	6	63819877	63819902	26	-
ENSSSCG00000003352	ENSSSCG00000003352	6	63804208	63819902	E004	221.421	0.00459332	15.0277	0.0017931	0.710137	19.7842	21.7268	19.3858	20.3436	-0.300432	-0.211571	0.0645483	0.15341	6	63805379	63805568	190	-
ENSSSCG00000003352	ENSSSCG00000003352	6	63804208	63819902	E004	221.421	0.00459332	15.0277	0.0017931	0.710137	19.7842	21.7268	19.3858	20.3436	-0.300432	-0.211571	0.0645483	0.15341	6	63805379	63805568	190	-
ENSSSCG00000003352	ENSSSCG00000003352	6	63804208	63819902	E024	29.0335	0.0163718	15.1857	0.0016646	0.704405	8.59539	6.99733	6.73072	8.18679	0.603023	0.459875	0.716511	0.573364	6	63819841	63819876	36	-
ENSSSCG00000003352	ENSSSCG00000003352	6	63804208	63819902	E024	29.0335	0.0163718	15.1857	0.0016646	0.704405	8.59539	6.99733	6.73072	8.18679	0.603023	0.459875	0.716511	0.573364	6	63819841	63819876	36	-
ENSSSCG00000003353	SLC35E2B	6	63820812	63835561	E002	64.3521	0.00475175	12.0255	0.00729629	0.898743	11.8816	11.0723	10.7647	11.7752	0.2106	0.183673	0.294451	0.267525	6	63825689	63825834	146	-
ENSSSCG00000003353	SLC35E2B	6	63820812	63835561	E009	4.14454	0.172559	8.94807	0.0299893	1	3.47083	2.55653	3.65836	2.00612	0.884302	-0.700511	-0.152344	-1.73716	6	63833600	63833758	159	-
ENSSSCG00000003353	SLC35E2B	6	63820812	63835561	E003	54.243	0.0140524	9.49595	0.0233744	1	10.7798	10.8164	9.49773	10.5735	-0.0100848	-0.0675252	0.375251	0.317811	6	63827674	63827746	73	-
ENSSSCG00000003353	SLC35E2B	6	63820812	63835561	E001	729.409	0.0103619	8.60338	0.0350565	1	32.2819	33.7764	34.7148	34.1737	-0.166343	0.0434912	-0.268607	-0.0587734	6	63820812	63824737	3926	-
ENSSSCG00000003362	CEP104	6	65274488	65310669	E020	52.3006	0.0112112	9.21089	0.0266145	1	10.9039	9.38328	10.6677	10.1882	0.445103	0.243473	0.0651374	-0.136492	6	65297185	65297358	174	-
ENSSSCG00000003366	CHD5	6	67017417	67086711	E001	3.16036	0.358206	11.1349	0.0110183	0.944648	1.61542	1.63081	2.60229	3.67944	-0.0273771	2.35195	-1.37733	1.00199	6	67017417	67018694	1278	-
ENSSSCG00000003371	GPR153	6	67138961	67145516	E008	72.2061	0.00853755	12.6227	0.00552786	0.851497	12.8932	12.6053	11.759	11.378	0.0679531	-0.306733	0.276297	-0.098389	6	67143300	67143729	430	-
ENSSSCG00000003374	ESPN	6	67284079	67316591	E015	1.8696	0.63591	8.49528	0.0368115	1	2.81216	0.730716	0.772464	2.401	3.89141	3.43451	3.73107	3.27417	6	67305162	67305318	157	+
ENSSSCG00000003376	PLEKHG5	6	67321534	67362838	E006	54.6411	0.00758855	8.37174	0.0389224	1	11.0838	11.0253	10.3634	9.81901	0.0157483	-0.34391	0.199771	-0.159887	6	67323018	67323102	85	-
ENSSSCG00000003384	DNAJC11	6	67463374	67529930	E004	158.754	0.00287049	11.6697	0.00860471	0.913257	18.2291	17.4465	17.7524	16.6876	0.137134	-0.138083	0.0829264	-0.192291	6	67465316	67465458	143	-
ENSSSCG00000003384	DNAJC11	6	67463374	67529930	E005	118.343	0.00647672	8.10451	0.0439004	1	15.693	15.8219	15.1924	14.4223	-0.0251482	-0.283262	0.0993933	-0.158721	6	67465532	67465589	58	-
ENSSSCG00000003384	DNAJC11	6	67463374	67529930	E007	166.564	0.00180178	7.83473	0.0495537	1	18.2607	18.076	17.0992	18.0777	0.0318575	0.000283442	0.20509	0.173516	6	67467398	67467553	156	-
ENSSSCG00000003395	PIK3CD	6	70026373	70084742	E017	124.256	0.002841	12.9796	0.00468089	0.820746	15.4911	14.6154	15.2679	16.3867	0.177875	0.35082	0.0444735	0.217418	6	70080440	70080618	179	+
ENSSSCG00000003395	PIK3CD	6	70026373	70084742	E013	151.611	0.00391715	9.99874	0.0185768	1	17.5403	16.3203	17.6368	16.3784	0.223588	0.0109728	-0.0171069	-0.229722	6	70079334	70079501	168	+
ENSSSCG00000003395	PIK3CD	6	70026373	70084742	E016	91.9915	0.00649354	8.68997	0.03371	1	13.3082	12.6767	13.0911	14.3901	0.146478	0.383366	0.0496173	0.286505	6	70080228	70080327	100	+
ENSSSCG00000003396	CLSTN1	6	70086247	70165174	E012	271.148	0.00282691	10.51	0.0146935	0.977357	22.6471	21.479	22.3029	22.8131	0.172028	0.19592	0.0499565	0.0738491	6	70092482	70092639	158	-
ENSSSCG00000003398	UBE4B	6	70345813	70462434	E037	139.182	0.00703558	9.16348	0.0271945	1	15.2998	16.8225	16.8141	16.9558	-0.292224	0.0244707	-0.290675	0.0260195	6	70459824	70459998	175	+
ENSSSCG00000003398	UBE4B	6	70345813	70462434	E039	300.841	0.010435	9.10265	0.0279567	1	21.9177	24.3754	23.4981	23.638	-0.349007	-0.101786	-0.227636	0.0195849	6	70461046	70462420	1375	+
ENSSSCG00000003398	UBE4B	6	70345813	70462434	E007	175.882	0.00206867	8.93357	0.0301873	1	18.9953	18.143	17.9106	18.1412	0.144347	-0.000312113	0.184699	0.0400397	6	70346027	70346550	524	+
ENSSSCG00000003398	UBE4B	6	70345813	70462434	E038	124.638	0.0055885	10.3995	0.0154583	0.985239	14.5918	16.4724	15.7378	15.7549	-0.371862	-0.137233	-0.231296	0.00333213	6	70460578	70460724	147	+
ENSSSCG00000003400	NMNAT1	6	70272014	70310707	E001	7.18739	0.0672362	9.67279	0.0215625	1	2.93129	4.64205	3.64419	3.9539	-1.33141	-0.465234	-0.629922	0.236255	6	70272014	70272059	46	+
ENSSSCG00000003401	KIF1B	6	70495144	70661798	E028	67.8691	0.00457354	9.10739	0.0278966	1	11.7699	11.5208	12.4406	11.1337	0.0639266	-0.101965	-0.166057	-0.331949	6	70586783	70586855	73	+
ENSSSCG00000003405	PEX14	6	70737905	70872072	E003	39.922	0.0100028	19.3755	0.00022862	0.443571	9.34855	8.17953	8.11592	9.96174	0.39326	0.58108	0.416181	0.604001	6	70755920	70755967	48	+
ENSSSCG00000003407	CASZ1	6	70878983	70933357	E001	3.06783	0.139804	10.8997	0.0122806	0.96017	3.2284	2.0092	1.47703	1.96391	1.37084	-0.0658586	2.2594	0.822709	6	70878983	70879672	690	-
ENSSSCG00000003407	CASZ1	6	70878983	70933357	E020	2.68519	0.186401	12.9953	0.00464681	0.820318	2.18724	2.31265	3.11664	0.0145389	-0.161086	-14.629	-1.02364	-15.4916	6	70899157	70899225	69	-
ENSSSCG00000003412	EXOSC10	6	71258999	71282433	E020	1.73975	0.294093	12.0547	0.00719824	0.898743	3.02785	0.879783	1.66072	1.40506	3.56936	1.35129	1.73543	-0.482644	6	71268064	71268092	29	-
ENSSSCG00000003413	MTOR	6	71286989	71412888	E006	60.8154	0.0153235	8.32112	0.039821	1	10.1516	11.5897	11.9036	10.849	-0.394154	-0.196881	-0.474071	-0.276798	6	71295602	71295667	66	-
ENSSSCG00000003429	CLCN6	6	71881972	71916029	E021	11.8781	0.0237146	8.68158	0.0338382	1	5.23204	5.04699	4.01269	5.56446	0.104628	0.283738	0.769919	0.949029	6	71909488	71909559	72	+
ENSSSCG00000003429	CLCN6	6	71881972	71916029	E001	8.83773	0.0579445	8.32795	0.0396985	1	3.8173	4.93114	3.41872	4.73582	-0.742458	-0.117331	0.319294	0.944421	6	71881972	71882130	159	+
ENSSSCG00000003433	PLOD1	6	71988459	72021804	E021	7.06272	0.0757664	11.9689	0.00749053	0.898743	2.49805	4.47356	4.10332	3.74639	-1.68651	-0.514134	-1.43603	-0.26366	6	72021481	72021804	324	+
ENSSSCG00000003434	MFN2	6	72028499	72056438	E008	104.381	0.00848977	9.2121	0.0265998	1	14.5376	13.4216	14.0577	15.1506	0.242282	0.36834	0.102058	0.228116	6	72043244	72043352	109	+
ENSSSCG00000003438	VPS13D	6	72256828	72510058	E010	29.1723	0.0223269	8.87963	0.0309349	1	7.80409	8.47234	6.53287	7.28178	-0.241212	-0.444094	0.519981	0.317099	6	72276645	72276745	101	+
ENSSSCG00000003438	VPS13D	6	72256828	72510058	E011	35.8936	0.0106221	9.95141	0.0189837	1	8.87037	8.93547	7.3943	8.26957	-0.0215398	-0.227831	0.534317	0.328026	6	72277829	72277997	169	+
ENSSSCG00000003438	VPS13D	6	72256828	72510058	E022	101.843	0.0101729	11.4797	0.00939576	0.924642	14.9425	14.3523	13.3811	12.9743	0.122814	-0.305541	0.335208	-0.0931471	6	72297629	72298660	1032	+
ENSSSCG00000003438	VPS13D	6	72256828	72510058	E054	36.8717	0.0136147	9.82227	0.0201389	1	7.82927	9.47752	8.63547	8.16766	-0.562139	-0.437984	-0.287856	-0.163702	6	72377730	72377853	124	+
ENSSSCG00000003438	VPS13D	6	72256828	72510058	E058	41.4445	0.0194518	12.7348	0.00524656	0.83363	8.81558	8.10362	9.94871	10.192	0.247572	0.676148	-0.357008	0.0715675	6	72391911	72392019	109	+
ENSSSCG00000003438	VPS13D	6	72256828	72510058	E070	70.6088	0.0243705	9.66553	0.0216341	1	10.9985	12.5014	11.4917	12.4192	-0.382985	-0.0198023	-0.130804	0.232379	6	72508254	72508494	241	+
ENSSSCG00000003451	PDPN	6	73019057	73049996	E001	311.267	0.00215589	33.2006	2.92167e-07	0.0181977	24.5061	23.0007	24.0817	22.5725	0.209518	-0.0614866	0.0580642	-0.21294	6	73019057	73019334	278	+
ENSSSCG00000003451	PDPN	6	73019057	73049996	E006	1336.27	0.00606673	8.27201	0.0407122	1	41.0008	41.8711	41.4261	43.6579	-0.0859866	0.174081	-0.0421227	0.217945	6	73048268	73049996	1729	+
ENSSSCG00000003458	EFHD2	6	74651809	74668409	E001	1035.59	0.00256469	7.86574	0.0488695	1	39.107	38.299	38.6912	37.5733	0.0824705	-0.0748118	0.0423291	-0.114953	6	74651809	74652202	394	+
ENSSSCG00000003460	CASP9	6	74706516	74730007	E008	50.7815	0.0120137	8.64309	0.0344325	1	10.9919	9.87702	10.1875	9.63716	0.317427	-0.0727194	0.225746	-0.1644	6	74727525	74727879	355	-
ENSSSCG00000003461	RSC1A1	6	74809350	74855423	E007	118.93	0.00432093	9.07904	0.0282583	1	15.1157	14.7008	15.2443	14.1764	0.0849857	-0.110538	-0.0259262	-0.22145	6	74832415	74832543	129	+
ENSSSCG00000003461	RSC1A1	6	74809350	74855423	E008	99.8129	0.00576295	11.3466	0.00999209	0.929753	14.0775	13.3575	14.178	13.0441	0.158967	-0.0716289	-0.0216094	-0.252205	6	74838311	74838414	104	+
ENSSSCG00000003461	RSC1A1	6	74809350	74855423	E001	87.5018	0.0130685	13.452	0.00375448	0.787267	13.0768	13.2542	12.7406	11.4307	-0.0406565	-0.444181	0.0784395	-0.325085	6	74809350	74809687	338	+
ENSSSCG00000003461	RSC1A1	6	74809350	74855423	E002	48.767	0.0115043	10.8243	0.0127151	0.966103	9.41241	10.4044	9.42953	8.65486	-0.296587	-0.54391	-0.00536662	-0.252689	6	74809688	74809723	36	+
ENSSSCG00000003461	RSC1A1	6	74809350	74855423	E009	151.597	0.00376207	12.7817	0.00513335	0.831485	16.8689	16.3034	17.3033	16.2035	0.105458	-0.0189671	-0.0789671	-0.203392	6	74840475	74840664	190	+
ENSSSCG00000003461	RSC1A1	6	74809350	74855423	E014	1472.68	0.00743303	8.21017	0.0418621	1	42.0404	43.0684	42.1144	44.6429	-0.100361	0.15175	-0.00725885	0.244851	6	74849405	74855423	6019	+
ENSSSCG00000003464	DNAJC16	6	74732169	74774311	E003	7.10995	0.0663034	7.99037	0.0462111	1	3.75281	3.5712	4.83181	3.25176	0.14364	-0.271204	-0.732722	-1.14757	6	74734503	74734687	185	+
ENSSSCG00000003464	DNAJC16	6	74732169	74774311	E017	79.2746	0.0206265	17.2052	0.000641286	0.539765	12.9191	13.8392	11.0521	12.589	-0.207851	-0.285734	0.467355	0.389472	6	74766584	74768892	2309	+
ENSSSCG00000003465	FBLIM1	6	74929932	74966942	E020	37.766	0.0447106	9.97176	0.0188077	1	8.03247	9.0458	10.1731	7.96058	-0.34941	-0.375789	-0.696544	-0.722923	6	74963811	74965579	1769	+
ENSSSCG00000003468	PLEKHM2	6	74864968	74907766	E011	233.702	0.00349988	12.046	0.00722727	0.898743	20.7196	19.8609	21.2035	21.6617	0.135187	0.278426	-0.0742005	0.069039	6	74900504	74900626	123	+
ENSSSCG00000003468	PLEKHM2	6	74864968	74907766	E020	260.354	0.00160231	9.63572	0.0219305	1	22.1574	22.7306	21.4416	21.4559	-0.0832914	-0.187536	0.106408	0.00216299	6	74905250	74905409	160	+
ENSSSCG00000003470	FAM131C	6	75193399	75212154	E006	15.6574	0.0313062	7.95752	0.0468979	1	6.52024	5.80953	5.42545	5.07617	0.336355	-0.39241	0.535362	-0.193403	6	75195559	75195741	183	-
ENSSSCG00000003470	FAM131C	6	75193399	75212154	E012	3.92453	0.215	7.95627	0.0469241	1	2.34313	2.21178	4.05778	2.66772	0.166677	0.541648	-1.58871	-1.21374	6	75212087	75212154	68	-
ENSSSCG00000003471	EPHA2	6	75251467	75279314	E012	152.526	0.00240449	11.2096	0.0106448	0.938122	17.2204	17.3533	17.9985	16.3265	-0.0239115	-0.189024	-0.137839	-0.302951	6	75262476	75262629	154	-
ENSSSCG00000003471	EPHA2	6	75251467	75279314	E016	443.637	0.00333954	12.0893	0.00708348	0.898743	28.42	26.4218	27.55	27.8298	0.250712	0.177958	0.107618	0.0348644	6	75272179	75272848	670	-
ENSSSCG00000003472	ARHGEF19	6	75317823	75335270	E004	127.613	0.00682532	9.47273	0.0236233	1	15.833	15.3576	16.9825	15.4941	0.0935775	0.0271323	-0.216448	-0.282893	6	75321091	75321249	159	-
ENSSSCG00000003472	ARHGEF19	6	75317823	75335270	E009	148.559	0.00949208	9.3217	0.0253058	1	16.6277	18.1423	16.4094	16.7375	-0.271368	-0.250992	0.0408603	0.0612359	6	75324943	75325095	153	-
ENSSSCG00000003473	CPLANE2	6	75345259	75349943	E001	48.6205	0.0272854	8.79421	0.0321558	1	9.03335	9.69494	11.0137	10.1923	-0.208663	0.148115	-0.587047	-0.230269	6	75345259	75345983	725	-
ENSSSCG00000003479	MFAP2	6	75607521	75615641	E003	435.53	0.00202987	9.42263	0.0241688	1	26.7086	28.008	27.2214	27.2394	-0.163257	-0.0959159	-0.0650687	0.00227235	6	75609047	75609134	88	-
ENSSSCG00000003483	PADI4	6	75935889	75966293	E013	213.286	0.00455454	9.47549	0.0235935	1	17.3949	17.9317	17.2232	19.7746	-0.0948502	0.308368	0.0308574	0.434075	6	75962234	75962336	103	+
ENSSSCG00000003485	RCC2	6	75988272	76014160	E018	23.2397	0.0248882	14.3666	0.00244629	0.736965	7.8525	6.28921	7.60662	5.97899	0.648986	-0.147405	0.0932415	-0.70315	6	76013983	76014089	107	-
ENSSSCG00000003486	ARHGEF10L	6	76083725	76229307	E020	127.241	0.0073713	8.73763	0.0329905	1	14.9729	15.603	16.5673	15.7625	-0.126212	0.0312482	-0.310953	-0.153492	6	76170648	76170829	182	+
ENSSSCG00000003486	ARHGEF10L	6	76083725	76229307	E006	48.3568	0.0197136	8.22251	0.0416302	1	10.6958	9.9278	9.50341	8.64475	0.221031	-0.408378	0.35023	-0.279179	6	76139721	76139812	92	+
ENSSSCG00000003488	UBR4	6	77568415	77708109	E012	215.781	0.00956508	8.62675	0.0346879	1	18.7928	21.1334	20.2809	20.2352	-0.373721	-0.139233	-0.2417	-0.0072122	6	77591767	77591957	191	-
ENSSSCG00000003488	UBR4	6	77568415	77708109	E005	298.113	0.0113681	10.7992	0.0128626	0.968057	21.6042	23.4912	23.1277	24.8113	-0.273345	0.181434	-0.222034	0.232745	6	77578818	77579012	195	-
ENSSSCG00000003488	UBR4	6	77568415	77708109	E025	119.299	0.00283559	9.58496	0.0224445	1	14.5953	14.975	15.8535	15.9677	-0.0783535	0.1968	-0.253084	0.0220693	6	77605208	77605337	130	-
ENSSSCG00000003488	UBR4	6	77568415	77708109	E014	204.35	0.00731888	10.034	0.0182796	1	18.2547	19.564	20.6961	20.1304	-0.218472	0.0907811	-0.397872	-0.0886192	6	77593470	77593577	108	-
ENSSSCG00000003488	UBR4	6	77568415	77708109	E023	127.225	0.00807776	8.18548	0.04233	1	15.0183	15.8412	15.477	16.8609	-0.163512	0.192596	-0.0921037	0.264005	6	77604094	77604203	110	-
ENSSSCG00000003488	UBR4	6	77568415	77708109	E024	152.881	0.00433199	12.8505	0.00497141	0.82965	16.4946	17.089	16.7244	18.5095	-0.109676	0.249434	-0.0428147	0.316296	6	77604928	77605085	158	-
ENSSSCG00000003488	UBR4	6	77568415	77708109	E055	103.349	0.0150671	16.424	0.000928165	0.623035	15.1871	15.1146	14.3759	12.2837	0.014635	-0.627806	0.167473	-0.474968	6	77638786	77638963	178	-
ENSSSCG00000003488	UBR4	6	77568415	77708109	E056	89.3174	0.0138395	12.1567	0.00686534	0.894728	13.9962	14.1149	13.3341	11.686	-0.0256389	-0.568668	0.14668	-0.396348	6	77639083	77639213	131	-
ENSSSCG00000003488	UBR4	6	77568415	77708109	E057	46.6384	0.01218	8.02402	0.0455179	1	10.5413	9.99336	9.27256	9.11848	0.158302	-0.270725	0.379595	-0.0494312	6	77641028	77641139	112	-
ENSSSCG00000003488	UBR4	6	77568415	77708109	E058	55.0768	0.0156258	9.05131	0.0286165	1	11.6691	10.5185	9.50532	10.4415	0.309251	-0.0217996	0.609211	0.278161	6	77641793	77641914	122	-
ENSSSCG00000003488	UBR4	6	77568415	77708109	E060	71.6876	0.0147964	12.5895	0.00561402	0.851655	13.2782	12.0003	11.5792	11.0433	0.30422	-0.248197	0.411084	-0.141333	6	77643761	77643935	175	-
ENSSSCG00000003488	UBR4	6	77568415	77708109	E061	75.2104	0.00693269	14.5476	0.00224701	0.722386	13.5213	11.7153	11.8758	12.0019	0.430988	0.0723276	0.390276	0.0316153	6	77644825	77644959	135	-
ENSSSCG00000003488	UBR4	6	77568415	77708109	E026	133.72	0.0101234	8.80511	0.0319975	1	15.0388	16.035	16.8311	16.8157	-0.196783	0.146844	-0.346452	-0.00282493	6	77608299	77608426	128	-
ENSSSCG00000003488	UBR4	6	77568415	77708109	E036	84.203	0.0043909	8.53258	0.0361965	1	12.3039	12.9406	12.6709	13.8541	-0.151677	0.206104	-0.0882903	0.26949	6	77613409	77613547	139	-
ENSSSCG00000003488	UBR4	6	77568415	77708109	E041	86.3338	0.00684434	16.7162	0.000808345	0.600244	12.7699	11.9158	13.7405	14.2069	0.20776	0.530152	-0.221137	0.101255	6	77618500	77618644	145	-
ENSSSCG00000003488	UBR4	6	77568415	77708109	E042	107.605	0.0074841	14.826	0.00197153	0.710137	14.013	13.5592	15.8757	15.0454	0.0997171	0.31618	-0.381178	-0.164715	6	77619156	77619324	169	-
ENSSSCG00000003488	UBR4	6	77568415	77708109	E043	94.7288	0.0065347	8.70391	0.0334979	1	14.1538	12.9277	14.4789	13.4457	0.274039	0.11854	-0.0690511	-0.224551	6	77619780	77619906	127	-
ENSSSCG00000003488	UBR4	6	77568415	77708109	E049	95.5799	0.011414	9.56357	0.0226646	1	14.7659	13.056	13.9876	13.4477	0.373129	0.0892227	0.164724	-0.119183	6	77625565	77625681	117	-
ENSSSCG00000003488	UBR4	6	77568415	77708109	E053	74.8746	0.014018	8.77385	0.0324537	1	12.5368	11.5499	13.2318	11.8202	0.24561	0.0691461	-0.162465	-0.338929	6	77636569	77636706	138	-
ENSSSCG00000003488	UBR4	6	77568415	77708109	E077	90.4468	0.0275456	8.65845	0.0341941	1	15.0239	13.276	12.8007	12.4653	0.375621	-0.189724	0.485525	-0.0798195	6	77659193	77659384	192	-
ENSSSCG00000003488	UBR4	6	77568415	77708109	E078	49.8545	0.0217283	9.81382	0.0202169	1	11.3573	9.91807	9.46637	9.42057	0.402637	-0.152153	0.540467	-0.0143236	6	77660795	77660858	64	-
ENSSSCG00000003488	UBR4	6	77568415	77708109	E088	40.1304	0.0225904	8.25814	0.0409673	1	9.92976	8.82277	9.29722	8.07491	0.348963	-0.26039	0.194551	-0.414801	6	77669394	77669516	123	-
ENSSSCG00000003488	UBR4	6	77568415	77708109	E089	40.1473	0.0149613	13.7531	0.0032613	0.764246	10.1396	9.21202	8.82093	7.99761	0.283662	-0.415864	0.411525	-0.288002	6	77669665	77669847	183	-
ENSSSCG00000003488	UBR4	6	77568415	77708109	E090	37.5246	0.0202193	17.155	0.000656725	0.547536	10.1927	8.82358	7.93441	7.91347	0.42611	-0.319914	0.738275	-0.00774906	6	77670559	77670687	129	-
ENSSSCG00000003488	UBR4	6	77568415	77708109	E091	32.0982	0.0451638	10.3764	0.0156232	0.986323	9.60296	8.00166	7.52492	7.17623	0.537102	-0.318928	0.717173	-0.138858	6	77671175	77671254	80	-
ENSSSCG00000003488	UBR4	6	77568415	77708109	E063	72.2198	0.0169082	7.98365	0.0463509	1	12.8141	12.7811	11.5819	10.8125	0.00774243	-0.500274	0.303119	-0.204897	6	77647452	77647668	217	-
ENSSSCG00000003488	UBR4	6	77568415	77708109	E065	77.1576	0.0227164	8.99295	0.0293847	1	13.4486	13.2567	11.7344	11.068	0.0434177	-0.54087	0.409795	-0.174493	6	77649108	77649271	164	-
ENSSSCG00000003488	UBR4	6	77568415	77708109	E068	52.0798	0.0246902	10.2635	0.0164542	0.989811	11.512	10.1131	10.2015	9.24926	0.385345	-0.264001	0.359564	-0.289781	6	77651957	77652114	158	-
ENSSSCG00000003488	UBR4	6	77568415	77708109	E072	77.5149	0.0258624	8.70637	0.0334606	1	13.3176	12.8872	12.4317	10.9693	0.0990637	-0.482318	0.207268	-0.374114	6	77654557	77654739	183	-
ENSSSCG00000003488	UBR4	6	77568415	77708109	E073	55.4831	0.0230376	12.7208	0.00528105	0.836444	11.12	11.078	11.0586	8.98221	0.0112735	-0.621114	0.016479	-0.615909	6	77656530	77656700	171	-
ENSSSCG00000003488	UBR4	6	77568415	77708109	E074	68.3843	0.0283035	12.0652	0.00716297	0.898743	12.4102	11.5903	12.6929	10.1813	0.204682	-0.385658	-0.067696	-0.658036	6	77657705	77657932	228	-
ENSSSCG00000003488	UBR4	6	77568415	77708109	E075	73.7436	0.0299374	8.25116	0.0410963	1	13.3551	11.5456	12.5686	11.2419	0.437212	-0.0795458	0.182886	-0.333872	6	77658348	77658495	148	-
ENSSSCG00000003488	UBR4	6	77568415	77708109	E004	277.542	0.0177644	8.47733	0.0371111	1	21.0438	22.7484	22.2086	24.1559	-0.252607	0.197789	-0.174273	0.276122	6	77575765	77575989	225	-
ENSSSCG00000003488	UBR4	6	77568415	77708109	E092	42.8098	0.0426879	10.2995	0.0161848	0.987685	10.8624	9.28127	8.99198	8.09531	0.46601	-0.402329	0.55939	-0.308949	6	77672479	77672614	136	-
ENSSSCG00000003489	EMC1	6	77718849	77747771	E015	167.561	0.00359699	16.3062	0.000981305	0.625866	16.7087	18.9485	18.2317	17.7236	-0.393018	-0.209718	-0.27173	-0.0884308	6	77730642	77730779	138	-
ENSSSCG00000003489	EMC1	6	77718849	77747771	E008	71.5544	0.0239563	9.8087	0.0202642	1	11.2157	12.7668	10.7448	13.0108	-0.387887	0.0570004	0.127709	0.572596	6	77723409	77723505	97	-
ENSSSCG00000003489	EMC1	6	77718849	77747771	E014	158.363	0.00470669	11.9534	0.00754449	0.898743	16.8315	18.1949	18.1192	16.8221	-0.24273	-0.244449	-0.229669	-0.231388	6	77728222	77728395	174	-
ENSSSCG00000003489	EMC1	6	77718849	77747771	E032	80.2902	0.0103123	10.1338	0.0174622	0.998764	13.6153	12.2046	11.8772	13.1096	0.329426	0.215082	0.410898	0.296554	6	77741404	77741407	4	-
ENSSSCG00000003489	EMC1	6	77718849	77747771	E036	126.19	0.0051406	7.92234	0.0476443	1	16.2041	15.5567	16.2973	15.1341	0.125425	-0.0843712	-0.0176927	-0.227489	6	77743570	77743635	66	-
ENSSSCG00000003492	SLC66A1	6	77761782	77778571	E008	59.4772	0.00727813	13.0446	0.00454123	0.813962	11.6467	10.0232	11.5421	10.7406	0.446539	0.205126	0.0269559	-0.214457	6	77776379	77776564	186	+
ENSSSCG00000003513	ECE1	6	79408326	79466152	E025	352.479	0.00420928	11.1326	0.0110298	0.944648	26.1826	23.9935	24.9084	25.1838	0.292619	0.161422	0.168039	0.0368414	6	79455754	79455895	142	-
ENSSSCG00000003514	HSPG2	6	79849698	79958334	E011	1030.84	0.00255478	19.0692	0.000264543	0.467289	36.7757	39.9025	38.2612	38.9906	-0.320764	-0.0922077	-0.154041	0.0745156	6	79857269	79857490	222	-
ENSSSCG00000003514	HSPG2	6	79849698	79958334	E088	260.12	0.00813843	9.38451	0.0245922	1	22.7492	21.267	22.506	21.2748	0.218751	0.00117871	0.0351228	-0.18245	6	79905700	79905847	148	-
ENSSSCG00000003514	HSPG2	6	79849698	79958334	E040	284.692	0.00447821	8.34764	0.0393476	1	22.969	22.3163	23.7178	22.4761	0.0942011	0.0232519	-0.10557	-0.176519	6	79874911	79875046	136	-
ENSSSCG00000003514	HSPG2	6	79849698	79958334	E086	225.15	0.00784173	10.7738	0.013014	0.968437	21.6443	19.1372	20.5616	20.8917	0.393506	0.279435	0.165149	0.0510775	6	79904328	79904414	87	-
ENSSSCG00000003514	HSPG2	6	79849698	79958334	E087	276.957	0.00553446	14.7058	0.0020861	0.715887	23.6637	21.3738	22.9675	22.2688	0.332102	0.132945	0.0982356	-0.100921	6	79904705	79904832	128	-
ENSSSCG00000003514	HSPG2	6	79849698	79958334	E010	1094.02	0.00397976	14.9883	0.00182668	0.710137	37.7749	40.8585	38.8919	39.7435	-0.312393	-0.111591	-0.114562	0.0862408	6	79856755	79856999	245	-
ENSSSCG00000003514	HSPG2	6	79849698	79958334	E095	378.298	0.0168323	9.57201	0.0225775	1	26.7365	25.5839	26.4663	24.4902	0.149438	-0.146349	0.0346206	-0.261167	6	79909729	79909860	132	-
ENSSSCG00000003514	HSPG2	6	79849698	79958334	E089	272.998	0.0100726	8.163	0.0427605	1	23.3108	21.9608	22.7037	21.7494	0.194905	-0.0313675	0.0865381	-0.139735	6	79905950	79906146	197	-
ENSSSCG00000003514	HSPG2	6	79849698	79958334	E090	290.638	0.00733975	15.3195	0.00156299	0.698932	24.2674	21.4754	23.4866	22.8819	0.400249	0.20633	0.108226	-0.0856931	6	79906239	79906418	180	-
ENSSSCG00000003514	HSPG2	6	79849698	79958334	E094	318.739	0.0151164	7.90352	0.0480483	1	24.66	23.9695	24.4322	22.948	0.094419	-0.14349	0.0309373	-0.206972	6	79909444	79909588	145	-
ENSSSCG00000003514	HSPG2	6	79849698	79958334	E102	305.774	0.00713648	10.8778	0.0124054	0.962011	24.6987	22.258	24.0074	23.269	0.342855	0.145319	0.0944144	-0.103122	6	79914947	79915010	64	-
ENSSSCG00000003514	HSPG2	6	79849698	79958334	E105	242.681	0.0128586	8.09975	0.0439946	1	22.4352	20.2151	21.7793	20.6107	0.336065	0.0619669	0.0964463	-0.177651	6	79921053	79921097	45	-
ENSSSCG00000003514	HSPG2	6	79849698	79958334	E106	244.565	0.0204459	8.03875	0.0452176	1	22.7435	20.5133	21.6417	20.4263	0.333829	-0.0135995	0.161531	-0.185898	6	79924030	79924165	136	-
ENSSSCG00000003531	KDM1A	6	80903424	80971873	E002	143.428	0.0066547	7.94714	0.047117	1	17.0345	16.5079	17.4415	15.7836	0.0972779	-0.138289	-0.0734019	-0.308969	6	80914900	80915065	166	+
ENSSSCG00000003549	LDLRAP1	6	83030702	83054377	E011	623.028	0.00583669	10.2342	0.0166771	0.992103	31.3721	32.8279	30.9243	31.6786	-0.164832	-0.129748	0.0516544	0.086738	6	83052447	83054376	1930	+
ENSSSCG00000003551	PAQR7	6	83318411	83329639	E003	174.109	0.0754441	9.93321	0.0191425	1	17.4226	20.1668	17.4433	17.9041	-0.460789	-0.375726	-0.00368064	0.0813828	6	83318416	83320499	2084	-
ENSSSCG00000003551	PAQR7	6	83318411	83329639	E008	10.5294	0.0522046	10.3129	0.016085	0.987438	4.96652	4.02226	4.97711	4.80806	0.611704	0.517548	-0.00618673	-0.100343	6	83329530	83329639	110	-
ENSSSCG00000003553	MTFR1L	6	83265420	83280250	E015	463.229	0.00680152	10.7849	0.0129477	0.968437	27.7087	29.285	27.4655	27.8914	-0.192629	-0.169934	0.0303792	0.0530738	6	83275550	83279233	3684	+
ENSSSCG00000003558	RPS6KA1	6	83905077	83950963	E013	1.57934	0.339665	10.2098	0.0168646	0.992103	2.51691	1.84453	0.0112745	0.923438	0.897913	-1.99732	15.6073	12.7121	6	83920851	83920954	104	+
ENSSSCG00000003558	RPS6KA1	6	83905077	83950963	E033	343.354	0.00154956	8.32771	0.0397029	1	23.5028	24.3018	24.0689	24.9758	-0.110651	0.0912626	-0.0786831	0.12323	6	83945733	83945870	138	+
ENSSSCG00000003558	RPS6KA1	6	83905077	83950963	E040	60.9544	0.201187	8.51931	0.036414	1	12.9374	11.6901	9.20247	6.91069	0.304184	-1.55064	1.01436	-0.840466	6	83947190	83950963	3774	+
ENSSSCG00000003559	ARID1A	6	84049087	84123349	E018	3.7673	0.200944	11.6175	0.00881523	0.917008	1.69216	2.35378	4.11108	3.01112	-0.953255	0.711985	-2.56667	-0.901433	6	84116149	84116151	3	+
ENSSSCG00000003561	ZDHHC18	6	84153838	84182305	E008	797.145	0.0066316	8.57079	0.0355768	1	32.9181	33.4664	33.7624	35.1851	-0.0608514	0.187065	-0.0934538	0.154463	6	84180429	84182305	1877	+
ENSSSCG00000003566	NUDC	6	84238430	84252046	E010	533.66	0.00184977	8.04569	0.0450768	1	28.9159	29.9788	30.2313	29.774	-0.127085	-0.0242555	-0.156849	-0.0540188	6	84251768	84252038	271	+
ENSSSCG00000003569	SLC9A1	6	84372649	84426997	E012	80.9728	0.0156445	11.7462	0.00830525	0.91033	13.8585	12.3062	12.8893	11.7712	0.35819	-0.13313	0.21904	-0.27228	6	84425868	84426412	545	-
ENSSSCG00000003570	WDTC1	6	84467735	84536584	E022	957.406	0.0076545	8.23434	0.041409	1	36.2054	38.056	36.485	38.1586	-0.192948	0.0105525	-0.029473	0.174028	6	84534588	84536584	1997	+
ENSSSCG00000003573	MAP3K6	6	84573329	84585392	E012	15.692	0.0246484	8.27376	0.0406802	1	4.87958	6.43514	5.86785	5.46639	-0.805152	-0.475169	-0.536208	-0.206226	6	84575733	84575892	160	-
ENSSSCG00000003573	MAP3K6	6	84573329	84585392	E025	14.4428	0.044735	8.1127	0.043739	1	6.25857	4.66965	5.0009	5.78704	0.851676	0.623489	0.652704	0.424517	6	84579890	84580052	163	-
ENSSSCG00000003577	WASF2	6	84622800	84697429	E002	114.053	0.0112487	18.2336	0.000393645	0.499029	13.408	16.4281	14.9265	14.8598	-0.620217	-0.308034	-0.325857	-0.013674	6	84622802	84622809	8	-
ENSSSCG00000003577	WASF2	6	84622800	84697429	E003	597.479	0.0101848	7.96995	0.0466368	1	29.6645	32.4249	30.9996	31.3255	-0.319192	-0.12501	-0.156604	0.0375782	6	84622810	84623497	688	-
ENSSSCG00000003577	WASF2	6	84622800	84697429	E001	107.87	0.0100054	17.7049	0.000505998	0.518617	13.1805	16.0028	14.5469	14.3561	-0.591015	-0.332239	-0.298966	-0.0401889	6	84622800	84622801	2	-
ENSSSCG00000003586	EPB41	6	85865277	86029508	E011	368.682	0.00673033	8.02302	0.0455383	1	24.5346	24.0954	23.9496	23.0754	0.0600561	-0.142693	0.0801732	-0.122576	6	85945285	85945503	219	+
ENSSSCG00000003590	PTPRU	6	86137737	86228145	E018	24.0145	0.0139173	8.86083	0.0311996	1	6.47274	7.27431	7.97752	6.51228	-0.341073	-0.323306	-0.611424	-0.593657	6	86203925	86204000	76	+
ENSSSCG00000003596	SNRNP40	6	87839337	87879570	E004	346.065	0.00348678	15.9132	0.00118143	0.667444	23.5864	25.3516	24.2408	25.6009	-0.240299	0.0329367	-0.0905988	0.182637	6	87839549	87839829	281	-
ENSSSCG00000003596	SNRNP40	6	87839337	87879570	E016	244.517	0.00310179	13.2544	0.00411744	0.800674	21.631	20.4816	22.243	20.7308	0.175644	0.0387433	-0.090525	-0.227426	6	87876534	87876663	130	-
ENSSSCG00000003596	SNRNP40	6	87839337	87879570	E018	134.247	0.00382016	13.8524	0.00311311	0.760496	16.8768	15.703	16.7597	15.2461	0.22243	-0.0905479	0.0215837	-0.291395	6	87879454	87879546	93	-
ENSSSCG00000003603	COL16A1	6	88177816	88242747	E061	945.931	0.00302973	9.04624	0.0286824	1	37.7601	35.8369	37.4274	37.423	0.201477	0.166565	0.0344608	-0.00045073	6	88221450	88221494	45	-
ENSSSCG00000003603	COL16A1	6	88177816	88242747	E029	1239.22	0.00118269	10.8139	0.0127757	0.966953	41.6309	40.9695	41.3082	40.1688	0.0654461	-0.0798834	0.0318751	-0.113454	6	88198573	88198614	42	-
ENSSSCG00000003604	ADGRB2	6	88256146	88293330	E028	13.6619	0.0739699	7.94365	0.0471907	1	4.90145	5.53453	6.58215	4.59442	-0.353031	-0.540798	-0.858075	-1.04584	6	88271305	88271469	165	-
ENSSSCG00000003604	ADGRB2	6	88256146	88293330	E029	9.88509	0.0860497	8.45689	0.0374552	1	4.748	4.82626	5.21232	3.44328	-0.0474557	-0.978619	-0.270978	-1.20214	6	88272074	88272238	165	-
ENSSSCG00000003612	EIF3I	6	88695926	88708678	E017	6.76651	0.219945	7.90886	0.0479333	1	3.06284	5.04233	3.81509	2.73478	-1.44457	-1.77219	-0.635671	-0.963289	6	88704380	88704564	185	+
ENSSSCG00000003613	HDAC1	6	88749634	88785411	E015	306.476	0.00164092	7.84185	0.0493959	1	23.2489	24.0357	22.7182	23.4224	-0.109854	-0.0854021	0.07572	0.100172	6	88783765	88783832	68	+
ENSSSCG00000003621	ZSCAN20	6	89732654	89754719	E002	3.13542	0.173738	11.0135	0.0116531	0.949647	2.80443	2.65736	3.17978	1.2916	0.155739	-2.08373	-0.363299	-2.60277	6	89732664	89732692	29	+
ENSSSCG00000003621	ZSCAN20	6	89732654	89754719	E001	2.01241	0.372752	13.1515	0.00432027	0.80747	2.34002	2.01648	2.75283	0.0162788	0.429902	-13.907	-0.469593	-14.8065	6	89732654	89732663	10	+
ENSSSCG00000003621	ZSCAN20	6	89732654	89754719	E007	32.6357	0.0150162	8.98294	0.0295186	1	8.31494	8.51251	7.19233	8.62208	-0.069025	0.0376203	0.425133	0.531779	6	89747572	89748255	684	+
ENSSSCG00000003627	ZMYM4	6	91455789	91623810	E009	29.7825	0.0194782	7.98694	0.0462824	1	8.66003	7.84538	7.17823	7.60742	0.290186	-0.0902744	0.550442	0.169981	6	91555036	91555248	213	+
ENSSSCG00000003628	CLSPN	6	91906320	91967901	E009	118.435	0.00416065	9.19219	0.0268418	1	14.6697	15.8225	14.5278	14.5303	-0.231565	-0.260658	0.0296158	0.000522202	6	91911465	91911629	165	-
ENSSSCG00000003628	CLSPN	6	91906320	91967901	E003	1.68399	0.451533	7.87679	0.0486278	1	1.86649	2.58998	0.704458	0.660469	-0.946463	-3.94515	2.81262	-0.186071	6	91907665	91907979	315	-
ENSSSCG00000003628	CLSPN	6	91906320	91967901	E024	54.7847	0.00989665	10.1924	0.0169998	0.992103	10.8635	9.50634	11.2735	9.91346	0.395569	0.124007	-0.110348	-0.38191	6	91936237	91936398	162	-
ENSSSCG00000003630	AGO3	6	91984303	92215149	E055	13.65	0.0520297	8.87833	0.0309531	1	6.15328	4.37044	5.60875	4.9272	0.994323	0.347957	0.269799	-0.376567	6	92170161	92170345	185	+
ENSSSCG00000003634	ADPRS	6	92237980	92244514	E004	152.178	0.00266601	8.83716	0.0315361	1	17.553	16.9238	16.4607	17.4123	0.113512	0.0884342	0.199388	0.174311	6	92242516	92242700	185	+
ENSSSCG00000003637	MAP7D1	6	92297987	92325584	E012	117.167	0.0310206	8.75094	0.0327923	1	15.053	16.6664	14.2453	14.1106	-0.313115	-0.510064	0.16809	-0.0288586	6	92318389	92318484	96	+
ENSSSCG00000003643	SF3A3	6	93951601	93976329	E010	451.343	0.00102492	9.75753	0.0207438	1	28.4466	27.4735	27.5251	27.5207	0.120441	0.00590456	0.113979	-0.00055779	6	93967073	93967211	139	-
ENSSSCG00000003643	SF3A3	6	93951601	93976329	E009	335.494	0.00160307	17.2476	0.00062851	0.538855	25.4311	23.9944	24.4103	23.8956	0.194121	-0.0136637	0.13707	-0.0707148	6	93965478	93965546	69	-
ENSSSCG00000003648	RRAGC	6	94785910	94802988	E007	105.15	0.00830732	8.85584	0.0312703	1	14.0902	14.2486	15.6294	13.9409	-0.03396	-0.0662761	-0.316456	-0.348773	6	94802662	94802988	327	-
ENSSSCG00000003648	RRAGC	6	94785910	94802988	E004	127.299	0.0041302	13.6537	0.00341655	0.764246	16.7199	15.6013	15.0786	15.5397	0.213459	-0.0121309	0.317847	0.0922571	6	94796226	94796340	115	-
ENSSSCG00000003652	AKIRIN1	6	94891363	94905662	E002	205.428	0.00516331	9.69365	0.021358	1	19.6841	20.2024	19.3481	18.758	-0.0827446	-0.235168	0.0545978	-0.0978257	6	94896308	94896448	141	+
ENSSSCG00000003654	MACF1	6	95153005	95301618	E041	13.2293	0.124835	8.92988	0.0302378	1	6.37417	5.21035	4.70533	4.38667	0.586869	-0.499528	0.882951	-0.203446	6	95190461	95190535	75	+
ENSSSCG00000003654	MACF1	6	95153005	95301618	E025	34.7022	0.0377322	7.97584	0.0465136	1	9.21019	7.12572	8.74356	8.73781	0.753378	0.598227	0.153212	-0.00193856	6	95157045	95157197	153	+
ENSSSCG00000003654	MACF1	6	95153005	95301618	E020	20.5086	0.0517406	12.9011	0.0048554	0.825801	6.88773	4.93522	7.24572	6.91294	0.970646	0.98132	-0.148134	-0.137459	6	95150836	95150857	22	+
ENSSSCG00000003654	MACF1	6	95153005	95301618	E011	28.034	0.0199202	14.6959	0.0020959	0.717313	8.34301	6.39284	8.28337	7.48509	0.779189	0.460913	0.0210776	-0.297198	6	95144509	95144615	107	+
ENSSSCG00000003654	MACF1	6	95153005	95301618	E058	35.5164	0.0325749	10.043	0.0182043	1	9.27063	7.23229	9.3239	8.26305	0.729257	0.390535	-0.0169091	-0.355631	6	95220434	95220496	63	+
ENSSSCG00000003654	MACF1	6	95153005	95301618	E017	49.0332	0.0302399	10.5161	0.0146522	0.9769	11.1792	8.82247	9.86105	10.0056	0.70107	0.371584	0.37256	0.0430744	6	95147557	95147830	274	+
ENSSSCG00000003654	MACF1	6	95153005	95301618	E010	27.4566	0.0358334	11.4102	0.00970233	0.928784	8.57558	6.37556	7.64879	7.56507	0.867918	0.499932	0.33574	-0.0322451	6	95144296	95144408	113	+
ENSSSCG00000003664	PPIE	6	95548652	95579964	E014	122.154	0.00591871	8.21037	0.0418582	1	15.9186	15.0065	14.7434	15.8605	0.180901	0.169658	0.234894	0.223651	6	95553665	95553746	82	+
ENSSSCG00000003664	PPIE	6	95548652	95579964	E023	292.442	0.0080449	9.11175	0.0278415	1	22.2737	24.8118	22.6383	22.5732	-0.355813	-0.31226	-0.0529487	-0.00939575	6	95564018	95566463	2446	+
ENSSSCG00000003664	PPIE	6	95548652	95579964	E010	113.106	0.00589253	11.5336	0.00916419	0.921047	15.5191	14.0106	15.2073	14.7031	0.31191	0.146716	0.062198	-0.102996	6	95551183	95551226	44	+
ENSSSCG00000003664	PPIE	6	95548652	95579964	E009	121.454	0.00528815	12.8051	0.00507755	0.830253	16.0224	14.5997	15.9299	14.9466	0.284774	0.0716428	0.0178244	-0.195306	6	95550003	95550101	99	+
ENSSSCG00000003664	PPIE	6	95548652	95579964	E020	204.037	0.0100219	8.73392	0.0330459	1	19.0472	21.0717	19.2906	19.1447	-0.321894	-0.305759	-0.0401515	-0.0240162	6	95563409	95563723	315	+
ENSSSCG00000003664	PPIE	6	95548652	95579964	E011	94.5507	0.00685732	11.0896	0.0112511	0.945922	14.4271	12.8472	13.8292	13.4392	0.350973	0.135876	0.128525	-0.0865717	6	95551711	95551737	27	+
ENSSSCG00000003664	PPIE	6	95548652	95579964	E028	2.8538	0.231722	7.93878	0.0472941	1	1.82604	3.61003	2.48496	1.63085	-1.97029	-2.29674	-0.890097	-1.21655	6	95572585	95572620	36	+
ENSSSCG00000003667	TRIT1	6	95626825	95683805	E001	6.75895	0.142392	10.839	0.0126294	0.964555	2.70694	5.08002	3.42368	3.47492	-1.82341	-1.10096	-0.679455	0.0429997	6	95626825	95627916	1092	-
ENSSSCG00000003669	MFSD2A	6	95738969	95753245	E002	20.5254	0.0478618	9.03229	0.0288647	1	6.39948	5.32663	6.53769	7.43915	0.534271	0.974127	-0.0623323	0.377524	6	95740721	95740852	132	+
ENSSSCG00000003670	RLF	6	95900086	95994043	E002	54.3357	0.0119682	15.6022	0.00136807	0.689071	11.085	9.86632	10.9707	9.89801	0.345761	0.00949212	0.0308724	-0.305397	6	95925563	95925717	155	+
ENSSSCG00000003680	RALBP1	6	98550933	98598206	E003	265.605	0.00387962	9.08613	0.0281674	1	22.923	21.474	21.5752	21.8868	0.212416	0.0616258	0.197224	0.0464336	6	98553346	98553467	122	-
ENSSSCG00000003684	MTCL1	6	99062354	99178468	E001	43.0855	0.0345843	11.0819	0.0112909	0.945922	9.48388	7.91583	9.61117	10.2399	0.531874	0.758865	-0.0393946	0.187596	6	99062354	99062951	598	-
ENSSSCG00000003687	EPB41L3	6	101420396	101671169	E004	1.38578	0.411747	8.24515	0.0412078	1	1.72249	0.577223	2.38084	1.68383	3.1556	3.09005	-0.934979	-1.00053	6	101570943	101570970	28	+
ENSSSCG00000003687	EPB41L3	6	101420396	101671169	E032	0.791899	0.652811	7.83686	0.0495065	1	0.0071953	0.00624106	2.04621	1.55562	0.41053	15.9239	-16.305	-0.791617	6	101664703	101664703	1	+
ENSSSCG00000003687	EPB41L3	6	101420396	101671169	E027	1.18997	0.28688	10.714	0.0133773	0.968875	1.21679	0.00624104	2.18154	1.9277	15.2147	16.5432	-1.68578	-0.357324	6	101662671	101662745	75	+
ENSSSCG00000003687	EPB41L3	6	101420396	101671169	E010	28.9673	0.0177179	8.4797	0.0370715	1	8.61147	7.10389	7.12024	7.9378	0.56434	0.325048	0.557616	0.318324	6	101624156	101624231	76	+
ENSSSCG00000003693	MYOM1	6	103451343	103597297	E051	1.53039	0.36698	13.7872	0.00320965	0.764246	2.25368	0.00696132	2.55391	1.50811	16.6794	15.5192	-0.361411	-1.52157	6	103593079	103593080	2	+
ENSSSCG00000003693	MYOM1	6	103451343	103597297	E045	10.132	0.0576084	14.1361	0.00272568	0.753981	3.38319	5.56468	4.15302	4.56873	-1.44329	-0.57287	-0.593771	0.276646	6	103586365	103586387	23	+
ENSSSCG00000003694	EMILIN2	6	103730626	103786927	E004	445.032	0.00128723	9.39599	0.024464	1	27.7587	27.1807	26.9476	28.0101	0.0724081	0.103579	0.101912	0.133083	6	103735160	103735537	378	-
ENSSSCG00000003705	CABLES1	6	108116444	108227744	E001	5.66998	0.137215	14.1617	0.00269312	0.753981	4.34926	1.92361	3.67298	3.49897	2.35974	1.7295	0.489714	-0.140517	6	108116444	108116506	63	+
ENSSSCG00000003705	CABLES1	6	108116444	108227744	E003	10.448	0.0416564	9.69506	0.0213442	1	4.45968	5.58774	4.13696	4.1163	-0.654985	-0.887292	0.217795	-0.0145114	6	108159520	108159591	72	+
ENSSSCG00000003705	CABLES1	6	108116444	108227744	E004	12.1988	0.021402	8.47843	0.0370926	1	5.23406	5.72344	4.45162	4.53937	-0.259952	-0.673427	0.470098	0.0566235	6	108167684	108167776	93	+
ENSSSCG00000003707	NPC1	6	108402879	108450990	E023	63.8925	0.0160514	8.10231	0.0439439	1	11.2679	10.443	12.312	11.6749	0.226174	0.332107	-0.265061	-0.159127	6	108429579	108429828	250	-
ENSSSCG00000003709	LAMA3	6	108548715	108805690	E051	3.2809	0.0918722	8.56144	0.0357274	1	2.63268	1.80554	3.67489	2.45815	1.0896	0.891344	-0.96485	-1.16311	6	108755901	108756097	197	+
ENSSSCG00000003709	LAMA3	6	108548715	108805690	E042	3.91522	0.353024	14.7131	0.00207896	0.715033	2.30848	3.96619	1.11552	2.06229	-1.5656	-1.8914	2.10001	1.77421	6	108731696	108731809	114	+
ENSSSCG00000003709	LAMA3	6	108548715	108805690	E043	3.68124	0.226773	8.45017	0.0375689	1	2.32381	3.32018	1.10701	2.845	-1.03169	-0.446785	2.14124	2.72614	6	108735804	108735913	110	+
ENSSSCG00000003710	TTC39C	6	108860324	108968678	E010	63.9812	0.00835928	8.7196	0.0332609	1	11.3538	10.5302	11.2947	12.0249	0.224139	0.395805	0.0155658	0.187232	6	108918233	108918587	355	+
ENSSSCG00000003710	TTC39C	6	108860324	108968678	E003	25.0807	0.0378588	8.18458	0.042347	1	6.385	7.37565	8.30743	6.80433	-0.421375	-0.235729	-0.770213	-0.584568	6	108860393	108860553	161	+
ENSSSCG00000003712	OSBPL1A	6	108997735	109221010	E005	121.512	0.00570231	10.0052	0.0185221	1	15.2676	14.5978	16.4945	15.5456	0.137019	0.192321	-0.237728	-0.182426	6	109002187	109002277	91	-
ENSSSCG00000003715	ZNF521	6	109833614	110124798	E001	69.2731	0.0193247	14.7824	0.00201234	0.710137	10.5971	13.0099	11.0087	12.0869	-0.613504	-0.221127	-0.113317	0.27906	6	109833614	109834430	817	-
ENSSSCG00000003718	TAF4B	6	110855636	110971994	E015	17.3544	0.0158046	9.06969	0.0283786	1	5.37288	5.97144	5.64189	6.77028	-0.307359	0.366161	-0.142097	0.531423	6	110926642	110926772	131	+
ENSSSCG00000003722	CDH2	6	112396721	112628432	E009	319.357	0.00591929	11.096	0.0112181	0.945922	24.9353	23.2881	24.7447	23.491	0.226689	0.028553	0.0256519	-0.172484	6	112442278	112442415	138	-
ENSSSCG00000003722	CDH2	6	112396721	112628432	E010	307.941	0.00544679	10.769	0.013043	0.968437	24.4952	22.9354	24.0203	23.4974	0.217354	0.0795683	0.0650457	-0.0727402	6	112451263	112451435	173	-
ENSSSCG00000003722	CDH2	6	112396721	112628432	E008	366.559	0.00442395	8.80281	0.0320308	1	25.904	25.4201	26.3357	24.7293	0.0635995	-0.0923378	-0.056014	-0.211951	6	112441432	112441617	186	-
ENSSSCG00000003728	TRAPPC8	6	115693119	115786648	E004	92.0739	0.00650906	10.0186	0.0184084	1	13.7755	14.2279	12.711	12.8866	-0.0980323	-0.299481	0.242748	0.0412996	6	115696769	115696858	90	-
ENSSSCG00000003728	TRAPPC8	6	115693119	115786648	E026	68.095	0.00727889	9.784	0.0204943	1	12.4277	11.1099	11.3898	11.6362	0.335196	0.138077	0.261017	0.0638984	6	115759828	115759943	116	-
ENSSSCG00000003728	TRAPPC8	6	115693119	115786648	E005	112.126	0.00906109	11.7319	0.00836038	0.910763	14.6582	15.8329	13.7019	14.7094	-0.235984	-0.225355	0.204934	0.215563	6	115703037	115703182	146	-
ENSSSCG00000003730	RNF138	6	115926774	115978724	E004	83.9324	0.0091661	8.13527	0.0432973	1	12.5595	12.1988	13.6873	13.3483	0.0874752	0.270969	-0.25935	-0.0758557	6	115927731	115927840	110	+
ENSSSCG00000003730	RNF138	6	115926774	115978724	E003	53.5919	0.0108281	8.16309	0.0427587	1	10.2393	9.70361	11.3829	10.4824	0.159103	0.228744	-0.314923	-0.245282	6	115927652	115927730	79	+
ENSSSCG00000003731	GAREM1	6	116100372	116325133	E006	39.415	0.00850701	13.2726	0.00408261	0.800674	9.29852	8.27611	9.74172	8.77214	0.342946	0.171176	-0.137566	-0.309336	6	116324581	116324849	269	-
ENSSSCG00000003736	ASXL3	6	117334259	117518026	E011	6.52381	0.10508	11.293	0.0102425	0.931831	3.23642	3.33733	3.17832	4.65035	-0.0888397	0.961307	0.0524136	1.10256	6	117509278	117511234	1957	+
ENSSSCG00000003741	ENSSSCG00000003741	6	119104768	119132588	E005	1.49806	0.162682	8.1326	0.0433494	1	2.22061	2.37487	1.26895	1.19957	-0.194058	-1.97226	1.61591	-0.162292	6	119126081	119126145	65	+
ENSSSCG00000003746	ENSSSCG00000003746	6	120472260	120473140	E002	4.07732	0.113382	14.3841	0.00242627	0.735382	2.96276	2.0432	2.66234	3.71859	1.07399	1.73155	0.309135	0.966701	6	120472541	120472950	410	+
ENSSSCG00000003747	KIAA1328	6	120670342	121035931	E013	47.2363	0.0194112	9.60552	0.0222349	1	9.15288	8.70738	10.5512	10.3848	0.147007	0.520509	-0.420699	-0.0471961	6	120991763	120991871	109	+
ENSSSCG00000003747	KIAA1328	6	120670342	121035931	E002	11.1524	0.0342793	9.55435	0.0227601	1	5.50965	5.32536	4.74538	3.91925	0.098925	-0.889572	0.433869	-0.554628	6	120670355	120670428	74	+
ENSSSCG00000003749	PIK3C3	6	125890712	126043157	E003	62.8195	0.010813	9.11884	0.0277519	1	11.9586	10.4548	11.8096	10.801	0.400589	0.0968041	0.0375323	-0.266252	6	125890802	125890859	58	+
ENSSSCG00000003749	PIK3C3	6	125890712	126043157	E002	45.4708	0.0175144	7.84256	0.0493802	1	10.2025	8.71377	10.2343	9.37421	0.465849	0.215354	-0.00922487	-0.25972	6	125890743	125890801	59	+
ENSSSCG00000003753	ENSSSCG00000003753	6	128637488	128643120	E005	28.382	0.0286235	10.6224	0.0139533	0.971861	6.8989	7.95085	8.17834	7.00271	-0.415449	-0.371806	-0.498245	-0.454601	6	128642762	128643120	359	+
ENSSSCG00000003755	MCOLN2	6	128776430	128836951	E002	22.9273	0.0373591	8.24225	0.0412617	1	6.33202	6.10033	8.08213	6.95928	0.108653	0.384384	-0.71377	-0.43804	6	128776445	128776586	142	+
ENSSSCG00000003755	MCOLN2	6	128776430	128836951	E003	33.4558	0.0188013	19.3334	0.000233255	0.443571	7.43036	7.26336	9.61319	8.84059	0.0665262	0.576701	-0.757352	-0.247178	6	128791999	128792158	160	+
ENSSSCG00000003755	MCOLN2	6	128776430	128836951	E009	33.0048	0.0180247	14.1825	0.00266703	0.753981	9.02697	8.0303	6.8101	8.20787	0.344059	0.0642103	0.826524	0.546675	6	128818209	128818321	113	+
ENSSSCG00000003755	MCOLN2	6	128776430	128836951	E011	45.9436	0.00720321	9.59527	0.0223392	1	10.1587	9.86757	8.813	9.19442	0.0861316	-0.208762	0.41976	0.124867	6	128822319	128822420	102	+
ENSSSCG00000003755	MCOLN2	6	128776430	128836951	E017	99.7512	0.0202846	12.6883	0.00536152	0.842319	12.4866	14.6044	14.4258	14.4529	-0.473777	-0.0317405	-0.436314	0.00572298	6	128836279	128836951	673	+
ENSSSCG00000003757	SSX2IP	6	129055523	129114217	E012	40.8	0.0147679	22.651	4.77435e-05	0.250963	9.53517	8.97973	7.0227	9.7894	0.177092	0.254888	0.898328	0.976124	6	129093237	129093414	178	+
ENSSSCG00000003757	SSX2IP	6	129055523	129114217	E008	27.9199	0.0181419	14.5854	0.00220752	0.722386	7.66646	7.56834	8.3668	6.08271	0.0377359	-0.638272	-0.256513	-0.932521	6	129082844	129083056	213	+
ENSSSCG00000003760	TTLL7	6	129708374	129867887	E020	8.06871	0.072649	8.03386	0.0453171	1	5.13585	3.9362	4.01374	3.38216	0.771757	-0.43927	0.715239	-0.495789	6	129816082	129816287	206	+
ENSSSCG00000003761	ADGRL2	6	131727084	132113933	E007	10.3311	0.13057	11.13	0.0110432	0.945467	3.68091	4.89198	6.00005	3.93926	-0.824683	-0.628204	-1.41841	-1.22193	6	131732230	131732258	29	-
ENSSSCG00000003761	ADGRL2	6	131727084	132113933	E017	76.1499	0.00729571	8.45123	0.037551	1	12.3343	11.5737	12.7647	13.0913	0.190557	0.369724	-0.103067	0.0760997	6	131752673	131752846	174	-
ENSSSCG00000003762	ADGRL4	6	134362901	134462694	E002	54.404	0.010849	9.96119	0.018899	1	10.5564	9.92202	11.69	9.98492	0.183783	0.0187135	-0.30389	-0.468959	6	134363013	134363077	65	+
ENSSSCG00000003762	ADGRL4	6	134362901	134462694	E016	202.168	0.00322898	10.4253	0.0152763	0.984212	18.908	19.6027	18.8557	20.2982	-0.114165	0.110999	0.00872503	0.233889	6	134460729	134460897	169	+
ENSSSCG00000003762	ADGRL4	6	134362901	134462694	E006	116.773	0.00550453	10.8321	0.0126695	0.964723	15.5737	15.0793	15.9385	14.3275	0.0988246	-0.15592	-0.0711414	-0.325886	6	134423137	134423207	71	+
ENSSSCG00000003762	ADGRL4	6	134362901	134462694	E007	138.764	0.00530725	9.02208	0.0289987	1	16.8402	16.5757	16.9255	15.5908	0.0490167	-0.188719	-0.0156704	-0.253406	6	134424069	134424251	183	+
ENSSSCG00000003762	ADGRL4	6	134362901	134462694	E011	156.359	0.00375913	8.70636	0.0334609	1	17.5496	17.6729	16.2719	17.7628	-0.0218422	0.0158411	0.234409	0.272093	6	134435270	134435443	174	+
ENSSSCG00000003763	IFI44	6	134633615	134650203	E005	108.303	0.00749916	7.91141	0.0478785	1	14.334	14.7212	15.1989	13.657	-0.081164	-0.22796	-0.1787	-0.325496	6	134644123	134644272	150	-
ENSSSCG00000003770	MIGA1	6	135423423	135512701	E021	20.6446	0.0466762	9.29334	0.0256346	1	7.01479	7.30821	5.28427	6.3164	-0.119842	-0.425988	0.825517	0.519371	6	135490926	135491062	137	-
ENSSSCG00000003771	FUBP1	6	135281521	135318714	E030	22.2572	0.0540047	8.45475	0.0374914	1	7.28518	7.7212	5.9508	5.79756	-0.170218	-0.83669	0.59051	-0.0759622	6	135313599	135313970	372	+
ENSSSCG00000003771	FUBP1	6	135281521	135318714	E023	295.589	0.00324468	10.4952	0.0147937	0.977731	22.1252	23.7727	23.6963	23.2514	-0.235393	-0.0731038	-0.224759	-0.0624703	6	135297631	135297791	161	+
ENSSSCG00000003771	FUBP1	6	135281521	135318714	E002	1.66351	0.223823	9.99718	0.0185901	1	2.72356	0.880407	1.75861	1.65715	3.26104	1.82568	1.26377	-0.171589	6	135281537	135281551	15	+
ENSSSCG00000003772	ZZZ3	6	135606192	135741487	E003	40.577	0.0144529	9.92144	0.0192459	1	9.72457	8.25622	9.71666	8.77477	0.482368	0.179128	0.00240589	-0.300835	6	135653550	135653703	154	+
ENSSSCG00000003778	LHX8	6	138074855	138099810	E002	2.63929	0.147513	9.08472	0.0281855	1	1.73988	3.40175	1.94771	1.62124	-1.93784	-2.14177	-0.325875	-0.529805	6	138079496	138079679	184	-
ENSSSCG00000003788	PTGER3	6	141958955	142161286	E010	8.68306	0.0813715	7.9511	0.0470332	1	3.76776	3.88576	5.62411	3.67613	-0.0893265	-0.160631	-1.1625	-1.23381	6	142159698	142161286	1589	+
ENSSSCG00000003789	CTH	6	142454914	142486367	E013	24.3767	0.0136535	7.89771	0.0481737	1	6.95204	7.63797	6.21633	7.25045	-0.275324	-0.152438	0.326446	0.449332	6	142478858	142478952	95	-
ENSSSCG00000003791	SRSF11	6	142621924	142642073	E005	669.864	0.00451601	10.0079	0.0184994	1	31.4066	32.3325	33.8395	32.632	-0.105299	0.0336593	-0.27286	-0.133902	6	142627420	142627509	90	-
ENSSSCG00000003795	WLS	6	144399926	144555880	E014	148.597	0.00410372	12.1329	0.0069414	0.897916	16.3085	16.1079	17.4057	17.3792	0.0381665	0.235254	-0.201833	-0.00474552	6	144499982	144500143	162	+
ENSSSCG00000003799	IL12RB2	6	145212981	145281791	E012	8.32143	0.112817	7.85682	0.0490653	1	4.69681	4.27612	3.8173	2.66306	0.272201	-1.37072	0.601121	-1.0418	6	145271704	145271888	185	-
ENSSSCG00000003805	PDE4B	6	146166688	146719682	E023	1.10392	0.48735	11.0944	0.0112261	0.945922	0.00865197	1.93982	0.732435	2.01682	-15.6188	0.112428	-12.8073	2.92397	6	146614850	146615088	239	-
ENSSSCG00000003805	PDE4B	6	146166688	146719682	E014	231.275	0.00596451	7.83907	0.0494574	1	21.1407	20.767	20.5274	19.6176	0.0573074	-0.181694	0.0945069	-0.144495	6	146210910	146211022	113	-
ENSSSCG00000003805	PDE4B	6	146166688	146719682	E015	147.461	0.0103715	16.3153	0.000977072	0.625866	17.763	16.9864	16.6645	15.0886	0.139141	-0.364843	0.198442	-0.305542	6	146211023	146211111	89	-
ENSSSCG00000003805	PDE4B	6	146166688	146719682	E001	122.93	0.0210257	16.2914	0.000988187	0.625866	14.4484	16.8845	13.9416	14.9339	-0.478418	-0.377644	0.108477	0.20925	6	146166688	146167260	573	-
ENSSSCG00000003809	JAK1	6	147429056	147567182	E018	308.076	0.00329641	15.8576	0.00121279	0.672954	24.5777	23.2154	23.9594	22.6395	0.188732	-0.082313	0.0846634	-0.186382	6	147549230	147549336	107	+
ENSSSCG00000003809	JAK1	6	147429056	147567182	E017	454.423	0.00221637	13.1785	0.00426607	0.806227	28.7148	27.562	28.0662	27.0745	0.142076	-0.061307	0.0794552	-0.123927	6	147540169	147540358	190	+
ENSSSCG00000003812	EFCAB7	6	148851183	148994952	E027	14.4026	0.0749833	10.8536	0.0125442	0.964054	5.59541	4.28519	5.28694	6.62027	0.774715	1.26479	0.164901	0.654976	6	148983542	148983753	212	-
ENSSSCG00000003812	EFCAB7	6	148851183	148994952	E028	17.9631	0.0572044	19.5995	0.000205471	0.443571	5.11292	4.95901	6.3431	7.70731	0.0887838	1.28565	-0.627467	0.569395	6	148994197	148994952	756	-
ENSSSCG00000003816	ATG4C	6	149608220	149692153	E010	39.2023	0.00918003	12.5681	0.00567019	0.85431	9.33439	9.43459	9.00164	7.92649	-0.031526	-0.512538	0.10706	-0.373952	6	149662668	149662751	84	-
ENSSSCG00000003816	ATG4C	6	149608220	149692153	E004	58.6246	0.00754834	8.44138	0.0377183	1	10.0777	11.1213	10.6493	11.3892	-0.292745	0.0709748	-0.163685	0.200035	6	149638631	149638707	77	-
ENSSSCG00000003818	DOCK7	6	149748036	149972168	E043	117.918	0.0103495	10.8209	0.0127347	0.966269	14.3946	16.1325	14.6538	15.915	-0.348946	-0.0418052	-0.0543361	0.252805	6	149937989	149938089	101	+
ENSSSCG00000003818	DOCK7	6	149748036	149972168	E033	98.6436	0.0067693	8.4076	0.0382978	1	14.3745	14.222	14.6559	13.1376	0.0324217	-0.240083	-0.0590299	-0.331535	6	149900931	149901070	140	+
ENSSSCG00000003818	DOCK7	6	149748036	149972168	E042	152.002	0.00832881	15.5896	0.00137621	0.689071	16.1519	17.9499	16.4732	18.1923	-0.32766	0.0420004	-0.0607859	0.308875	6	149937144	149937302	159	+
ENSSSCG00000003818	DOCK7	6	149748036	149972168	E009	89.7728	0.00809368	12.1204	0.00698182	0.898468	14.5548	12.6591	13.2594	13.3033	0.42221	0.149564	0.282608	0.00996103	6	149791755	149791967	213	+
ENSSSCG00000003818	DOCK7	6	149748036	149972168	E012	57.7256	0.0146918	9.601	0.0222808	1	11.7185	10.5417	11.0621	10.1433	0.315323	-0.114309	0.172022	-0.25761	6	149793682	149793831	150	+
ENSSSCG00000003818	DOCK7	6	149748036	149972168	E007	47.1516	0.00670649	8.1269	0.0434606	1	10.5832	9.3274	10.0759	9.5652	0.373976	0.0743517	0.145725	-0.1539	6	149787904	149787972	69	+
ENSSSCG00000003818	DOCK7	6	149748036	149972168	E010	58.83	0.0188732	8.69169	0.0336838	1	12.0891	10.3214	10.8839	10.522	0.471194	0.0571259	0.313537	-0.100532	6	149792278	149792363	86	+
ENSSSCG00000003820	USP1	6	149970915	149985509	E006	726.325	0.0021934	7.82152	0.0498481	1	33.6925	33.0327	33.9969	32.888	0.0729963	-0.0161161	-0.0334013	-0.122514	6	149977792	149978477	686	-
ENSSSCG00000003826	ENSSSCG00000003826	6	152635968	152709393	E008	14.0586	0.0269334	9.09861	0.0280081	1	5.16837	5.23838	3.71003	5.01671	-0.0390969	-0.125626	0.96151	0.874981	6	152651617	152651662	46	-
ENSSSCG00000003826	ENSSSCG00000003826	6	152635968	152709393	E012	8.74064	0.0337935	10.0414	0.0182177	1	3.4678	4.72142	3.1349	3.91021	-0.894327	-0.546632	0.292047	0.639741	6	152654120	152654143	24	-
ENSSSCG00000003826	ENSSSCG00000003826	6	152635968	152709393	E013	6.66054	0.0614392	11.5835	0.00895484	0.919103	2.92998	4.32558	2.56184	3.11363	-1.12789	-0.952042	0.388185	0.564029	6	152654146	152654160	15	-
ENSSSCG00000003826	ENSSSCG00000003826	6	152635968	152709393	E010	10.8791	0.0416378	9.68648	0.0214281	1	4.13275	5.11491	3.02177	4.21319	-0.618689	-0.562811	0.906449	0.962327	6	152651697	152651697	1	-
ENSSSCG00000003826	ENSSSCG00000003826	6	152635968	152709393	E009	12.0736	0.0402541	10.635	0.0138726	0.969521	4.52798	5.25264	3.12741	4.47322	-0.431062	-0.466361	1.0719	1.0366	6	152651665	152651694	30	-
ENSSSCG00000003830	MYSM1	6	153756182	153795535	E001	1.58502	0.309421	14.0982	0.00277454	0.753981	1.05569	0.80327	2.59749	2.56168	0.788648	3.34853	-2.60001	-0.0401215	6	153756182	153756190	9	+
ENSSSCG00000003831	OMA1	6	153882451	153949468	E001	8.99521	0.0626731	10.2833	0.016305	0.987685	4.02348	3.35065	5.33614	4.16818	0.52991	0.632309	-0.819397	-0.716998	6	153882451	153882600	150	+
ENSSSCG00000003833	DAB1	6	154936460	155374399	E029	21.4071	0.0180027	8.99029	0.0294202	1	5.95688	7.39051	6.03786	6.79183	-0.629543	-0.246989	-0.0393325	0.343221	6	155373619	155374107	489	+
ENSSSCG00000003839	PLPP3	6	155800678	155894912	E011	4.05651	0.250356	15.3097	0.00157021	0.698932	3.42349	3.30295	3.12915	1.14725	0.103732	-3.05482	0.26013	-2.89842	6	155866067	155868158	2092	+
ENSSSCG00000003848	LRP8	6	158905410	158983382	E022	92.7125	0.0148722	10.6203	0.0139664	0.972298	13.1637	13.4259	12.6127	14.8915	-0.0595477	0.314648	0.128784	0.50298	6	158982846	158983382	537	+
ENSSSCG00000003848	LRP8	6	158905410	158983382	E021	11.5151	0.0221046	8.76828	0.0325358	1	4.48659	4.69699	4.5814	5.71485	-0.132973	0.570009	-0.0606621	0.642319	6	158982843	158982845	3	+
ENSSSCG00000003849	MAGOH	6	158988614	159000035	E003	8.19147	0.0610255	8.2871	0.0404364	1	3.93415	4.39393	4.9405	3.29914	-0.320381	-0.830065	-0.660625	-1.17031	6	158988757	158988765	9	+
ENSSSCG00000003854	ECHDC2	6	159326150	159347173	E004	97.3283	0.0063695	10.311	0.0160992	0.987438	14.9423	13.8627	14.049	13.1772	0.228148	-0.153354	0.187666	-0.193836	6	159332394	159332461	68	+
ENSSSCG00000003859	TUT4	6	159692797	159793758	E005	30.6116	0.0252857	8.79106	0.0322017	1	8.83041	7.91489	7.76327	7.04006	0.321668	-0.342956	0.378384	-0.286239	6	159718742	159718919	178	+
ENSSSCG00000003859	TUT4	6	159692797	159793758	E006	19.7637	0.0164158	8.87814	0.0309557	1	6.91176	6.54614	6.5386	5.49255	0.158697	-0.511182	0.162063	-0.507816	6	159721244	159721332	89	+
ENSSSCG00000003861	ORC1	6	159819339	159852305	E009	134.313	0.00772439	10.5151	0.0146586	0.9769	16.643	14.7411	16.3901	16.3532	0.372701	0.318402	0.0473385	-0.00696108	6	159836145	159836511	367	+
ENSSSCG00000003861	ORC1	6	159819339	159852305	E004	49.5857	0.0213638	10.5714	0.0142843	0.97445	10.9389	9.04448	9.32892	10.1297	0.56313	0.334898	0.471795	0.243563	6	159825655	159825754	100	+
ENSSSCG00000003862	CC2D1B	6	159854593	159872015	E003	27.8652	0.0195177	7.89159	0.0483063	1	8.28219	7.47769	7.66582	6.70422	0.299675	-0.319234	0.226895	-0.392014	6	159854614	159854695	82	+
ENSSSCG00000003862	CC2D1B	6	159854593	159872015	E002	13.5013	0.0666718	8.626	0.0346997	1	6.02348	5.91912	4.62126	4.28003	0.0509068	-0.941914	0.770329	-0.222492	6	159854596	159854613	18	+
ENSSSCG00000003862	CC2D1B	6	159854593	159872015	E032	28.8437	0.0265646	9.60903	0.0221993	1	7.3976	8.92997	6.85193	7.52236	-0.552736	-0.503771	0.224064	0.273029	6	159868328	159869440	1113	+
ENSSSCG00000003863	ZFYVE9	6	159874028	160000904	E002	79.3619	0.0211699	9.01272	0.0291223	1	11.7975	13.7577	11.9005	12.8717	-0.462522	-0.201024	-0.0259994	0.235499	6	159874033	159874595	563	-
ENSSSCG00000003872	EPS15	6	160653917	160801288	E004	44.8541	0.00987628	9.16454	0.0271813	1	9.43904	9.08502	9.0149	10.5295	0.1128	0.436541	0.13564	0.459381	6	160653945	160654011	67	+
ENSSSCG00000003872	EPS15	6	160653917	160801288	E003	23.2272	0.0156797	21.191	9.60856e-05	0.307831	6.80404	5.96354	6.31695	8.30942	0.384544	0.969937	0.21677	0.802163	6	160653929	160653944	16	+
ENSSSCG00000003872	EPS15	6	160653917	160801288	E005	67.5428	0.00521078	12.0325	0.00727274	0.898743	11.6355	10.9553	11.2495	12.6275	0.179653	0.42486	0.100721	0.345928	6	160654012	160654070	59	+
ENSSSCG00000003872	EPS15	6	160653917	160801288	E001	6.66309	0.0928066	8.68836	0.0337346	1	3.2873	3.19888	3.25399	4.86036	0.0788949	1.21212	0.029468	1.16269	6	160653917	160653918	2	+
ENSSSCG00000003881	SPATA6	6	163278962	163406410	E016	2.89166	0.109642	7.8323	0.0496078	1	2.49226	1.39466	2.77018	2.63526	1.67671	1.83797	-0.305611	-0.144346	6	163352821	163352868	48	+
ENSSSCG00000003885	CMPK1	6	164162518	164197379	E003	794.46	0.00388917	7.88073	0.0485421	1	33.8215	35.2265	34.7265	35.5057	-0.15242	0.0298792	-0.0985754	0.0837242	6	164162520	164163327	808	-
ENSSSCG00000003888	STIL	6	164197600	164265818	E021	194.187	0.0154156	9.33395	0.0251651	1	18.4984	18.7766	17.8519	20.5657	-0.0469748	0.288998	0.111491	0.447464	6	164264310	164265818	1509	+
ENSSSCG00000003888	STIL	6	164197600	164265818	E001	43.2248	0.0134739	9.46646	0.0236908	1	8.53175	9.38039	10.1923	9.2001	-0.279406	-0.0572713	-0.524991	-0.302857	6	164197600	164198160	561	+
ENSSSCG00000003888	STIL	6	164197600	164265818	E007	17.046	0.0284278	14.5538	0.00224048	0.722386	6.0451	6.45757	5.79085	4.33278	-0.19242	-1.16016	0.125135	-0.842607	6	164220245	164220357	113	+
ENSSSCG00000003895	EFCAB14	6	164777970	164821367	E005	55.1192	0.00657995	10.0566	0.0180912	1	10.7249	9.64156	11.1843	10.8606	0.315652	0.353031	-0.124854	-0.0874751	6	164778496	164778605	110	+
ENSSSCG00000003901	FAAH	6	165060285	165079767	E018	20.0727	0.019373	12.821	0.00504016	0.829842	7.27949	5.44769	6.31916	6.57327	0.845291	0.547105	0.413195	0.115009	6	165070496	165070630	135	-
ENSSSCG00000003901	FAAH	6	165060285	165079767	E017	20.53	0.01502	10.3524	0.0157963	0.987438	7.34095	6.39439	5.70703	6.50861	0.403286	0.0516513	0.734594	0.382959	6	165069355	165069488	134	-
ENSSSCG00000003901	FAAH	6	165060285	165079767	E010	16.7456	0.022026	11.9209	0.00765898	0.898743	4.65763	6.31565	6.32687	6.05034	-0.885621	-0.125079	-0.8908	-0.130258	6	165065556	165065653	98	-
ENSSSCG00000003901	FAAH	6	165060285	165079767	E020	15.873	0.0455094	10.2051	0.016901	0.992103	6.44788	4.53353	5.83465	5.99809	1.02441	0.813627	0.291233	0.080452	6	165072316	165072429	114	-
ENSSSCG00000003913	MAST2	6	165406878	165619933	E061	57.0272	0.018229	11.2373	0.0105096	0.934939	10.8392	9.1868	11.1373	11.0674	0.489836	0.55185	-0.0807809	-0.0187664	6	165593790	165593937	148	-
ENSSSCG00000003913	MAST2	6	165406878	165619933	E033	2.5415	0.147193	17.5379	0.000547699	0.518617	3.04638	2.02901	0.676372	1.72505	1.17462	-0.468711	4.34579	2.70247	6	165419187	165419197	11	-
ENSSSCG00000003917	TESK2	6	165874180	165999999	E001	42.772	0.0142836	11.9046	0.00771707	0.900112	9.73237	8.71061	9.45587	7.97207	0.327216	-0.260337	0.0851839	-0.502368	6	165874180	165874524	345	+
ENSSSCG00000003918	TOE1	6	165999904	166012377	E009	56.2686	0.0122069	8.56488	0.035672	1	10.6165	9.92912	10.5626	11.6162	0.198505	0.466631	0.0151218	0.283248	6	166003301	166003740	440	-
ENSSSCG00000003918	TOE1	6	165999904	166012377	E008	80.4279	0.0051986	10.1494	0.0173383	0.997158	12.0619	12.3232	13.059	13.3505	-0.0642572	0.241046	-0.238678	0.0666252	6	166002412	166002554	143	-
ENSSSCG00000003923	HECTD3	6	166333303	166341760	E009	110.08	0.0079943	9.32628	0.0252532	1	15.2461	15.1194	14.8192	13.5918	0.0255274	-0.323951	0.0868093	-0.262669	6	166335357	166335439	83	+
ENSSSCG00000003923	HECTD3	6	166333303	166341760	E002	1.18482	0.216378	9.88434	0.0195753	1	0.949864	2.41121	0.908611	1.5247	-2.68981	-1.3238	0.128145	1.49416	6	166333312	166333313	2	+
ENSSSCG00000003928	PLK3	6	166528765	166533731	E007	153.173	0.00540182	11.7743	0.00819755	0.908484	16.8835	17.6043	15.5423	16.942	-0.129998	-0.119273	0.255252	0.265976	6	166530769	166530860	92	-
ENSSSCG00000003928	PLK3	6	166528765	166533731	E012	127.81	0.00688006	8.49276	0.0368534	1	16.4167	14.9815	15.9353	15.2808	0.280975	0.060485	0.0917444	-0.128745	6	166532646	166532775	130	-
ENSSSCG00000003931	KIF2C	6	166556776	166577904	E007	112.676	0.00873787	8.94524	0.0300278	1	14.8199	14.1866	13.9815	15.6663	0.132962	0.302974	0.177162	0.347174	6	166562193	166562397	205	-
ENSSSCG00000003931	KIF2C	6	166556776	166577904	E008	98.2223	0.00964955	9.11392	0.027814	1	13.3872	13.5904	13.0821	14.891	-0.045557	0.277724	0.0695795	0.39286	6	166563157	166563299	143	-
ENSSSCG00000003931	KIF2C	6	166556776	166577904	E022	67.993	0.00534346	8.41651	0.0381441	1	11.0782	11.3161	12.6608	11.5677	-0.0633468	0.0656283	-0.399575	-0.2706	6	166577673	166577904	232	-
ENSSSCG00000003931	KIF2C	6	166556776	166577904	E021	84.8509	0.00664024	8.55529	0.0358269	1	12.8767	12.5434	14.0009	12.2836	0.0788767	-0.0628396	-0.252974	-0.39469	6	166576283	166576377	95	-
ENSSSCG00000003940	HYI	6	167809093	167812117	E015	6.25023	0.0695663	11.9515	0.00755127	0.898743	3.16969	4.00321	4.43956	2.72888	-0.675912	-1.10897	-0.975844	-1.40891	6	167811582	167812117	536	+
ENSSSCG00000003941	SZT2	6	167811598	167861583	E002	39.2137	0.0225113	14.723	0.00206932	0.713074	7.54803	9.55227	8.78058	9.91341	-0.692551	0.109755	-0.444108	0.358198	6	167812566	167812634	69	-
ENSSSCG00000003941	SZT2	6	167811598	167861583	E044	13.798	0.0216182	11.9354	0.00760788	0.898743	5.77373	4.26626	5.80155	5.40346	0.878851	0.686031	-0.0139913	-0.206811	6	167830160	167830212	53	-
ENSSSCG00000003941	SZT2	6	167811598	167861583	E041	13.4023	0.0506316	8.36596	0.0390239	1	5.66875	4.123	5.68429	5.42494	0.92446	0.796577	-0.00796452	-0.135847	6	167829957	167829972	16	-
ENSSSCG00000003941	SZT2	6	167811598	167861583	E093	1.95969	0.273775	14.8122	0.00198438	0.710137	2.4789	0.00686702	1.87501	2.66322	16.9939	17.2013	0.80661	1.01392	6	167861431	167861583	153	-
ENSSSCG00000003941	SZT2	6	167811598	167861583	E043	13.2583	0.0381599	13.8498	0.00311684	0.760496	5.67423	3.91533	5.44173	5.77557	1.07703	1.12855	0.12171	0.17323	6	167830141	167830159	19	-
ENSSSCG00000003941	SZT2	6	167811598	167861583	E058	21.0046	0.0573673	13.6744	0.00338355	0.764246	5.74158	7.72805	7.12611	5.31436	-0.867527	-1.09244	-0.630136	-0.855046	6	167834887	167835051	165	-
ENSSSCG00000003941	SZT2	6	167811598	167861583	E057	26.2457	0.0684378	10.8325	0.012667	0.964723	6.66957	8.65147	7.76987	5.93482	-0.762287	-1.1026	-0.446655	-0.78697	6	167834596	167834800	205	-
ENSSSCG00000003941	SZT2	6	167811598	167861583	E003	53.5831	0.0222025	8.36733	0.0389999	1	9.19122	10.9244	10.9774	10.6372	-0.511726	-0.0792255	-0.526117	-0.0936168	6	167813863	167813979	117	-
ENSSSCG00000003943	MED8	6	167861373	167869411	E011	28.5504	0.018144	8.11505	0.0436929	1	8.16641	8.07367	7.17337	6.82373	0.0335271	-0.492433	0.379914	-0.146046	6	167867657	167868781	1125	+
ENSSSCG00000003949	CDC20	6	167886270	167890583	E007	283.467	0.0035654	8.23278	0.041438	1	22.5816	21.8563	22.6417	23.1972	0.106217	0.194316	-0.00867637	0.0794224	6	167888884	167888978	95	-
ENSSSCG00000003965	ENSSSCG00000003965	6	168765539	168870281	E003	2.68512	0.356863	9.77546	0.0205745	1	0.926989	2.67191	3.14732	2.12209	-3.05689	-0.665779	-3.53046	-1.13934	6	168765548	168765781	234	-
ENSSSCG00000003965	ENSSSCG00000003965	6	168765539	168870281	E020	1.02084	0.60857	8.34832	0.0393357	1	1.87741	1.81548	0.010652	0.00668712	0.0968671	-16.1708	14.9243	-1.34333	6	168828302	168831476	3175	-
ENSSSCG00000003973	CTPS1	6	170201751	170233016	E012	98.178	0.0113546	8.59757	0.0351487	1	13.8257	12.8905	14.272	14.7828	0.211568	0.415052	-0.0964026	0.107081	6	170213881	170214013	133	-
ENSSSCG00000004010	ERMARD	1	512678	540896	E016	57.9287	0.0155005	8.37447	0.0388746	1	10.8784	9.80487	10.9584	11.3906	0.30825	0.445338	-0.0218108	0.115278	1	534744	534845	102	-
ENSSSCG00000004010	ERMARD	1	512678	540896	E002	156.285	0.0162204	16.9856	0.000711584	0.566725	15.5388	18.9729	17.7167	16.8903	-0.620793	-0.363612	-0.405789	-0.148608	1	512679	513673	995	-
ENSSSCG00000004012	THBS2	1	855389	882473	E016	144.974	0.00308476	14.887	0.00191576	0.710137	16.7314	16.807	15.3215	17.4036	-0.0139511	0.108355	0.271077	0.393383	1	869527	869679	153	+
ENSSSCG00000004012	THBS2	1	855389	882473	E015	162.532	0.00458135	8.2387	0.0413278	1	17.5805	17.9642	16.529	18.0235	-0.0674232	0.0103122	0.191471	0.269206	1	869321	869448	128	+
ENSSSCG00000004016	ENSSSCG00000004016	1	1527441	1550812	E003	0.941008	0.379127	9.1283	0.0276328	1	2.00065	1.70745	1.10621	0.462053	0.457667	-3.77245	1.71076	-2.51936	1	1527704	1527756	53	-
ENSSSCG00000004017	FRMD1	1	1507627	1521666	E012	19.6352	0.0766389	11.5542	0.00907734	0.920331	7.30504	5.9391	6.56034	4.81222	0.604204	-0.611713	0.314185	-0.901732	1	1519442	1519521	80	+
ENSSSCG00000004018	AFDN	1	1570272	1698694	E017	82.999	0.0117857	10.508	0.0147064	0.977579	12.0398	13.2191	14.011	12.2605	-0.280925	-0.226487	-0.456981	-0.402543	1	1600087	1600173	87	-
ENSSSCG00000004018	AFDN	1	1570272	1698694	E008	1.77541	0.312087	7.82552	0.0497588	1	2.96804	1.2522	1.53458	1.61759	2.49286	0.739168	1.9058	0.152109	1	1584012	1584166	155	-
ENSSSCG00000004018	AFDN	1	1570272	1698694	E043	25.9729	0.0202164	9.31131	0.0254257	1	7.66054	6.42989	7.92248	7.23645	0.511925	0.345186	-0.0985683	-0.265307	1	1698344	1698694	351	-
ENSSSCG00000004018	AFDN	1	1570272	1698694	E018	78.8775	0.00956362	9.31516	0.0253812	1	12.214	12.5127	13.694	11.9709	-0.0725003	-0.132743	-0.344558	-0.404801	1	1602651	1602754	104	-
ENSSSCG00000004020	SFT2D1	1	2576729	2593506	E008	374.641	0.00207527	9.33424	0.0251617	1	25	25.7106	25.308	26.2886	-0.0942099	0.075265	-0.0410721	0.128403	1	2591685	2591714	30	+
ENSSSCG00000004020	SFT2D1	1	2576729	2593506	E001	24.9482	0.0504081	10.2372	0.0166537	0.992103	8.32172	5.73658	6.9198	7.4413	1.08725	0.759306	0.540454	0.212506	1	2576729	2576819	91	+
ENSSSCG00000004022	RPS6KA2	1	2203606	2522599	E039	50.3341	0.00695948	9.77732	0.020557	1	10.8114	10.1802	9.08351	10.1112	0.178617	-0.0201607	0.515547	0.316769	1	2517941	2518078	138	+
ENSSSCG00000004022	RPS6KA2	1	2203606	2522599	E007	14.0874	0.0960468	10.0555	0.0180998	1	4.57838	4.45795	6.0731	6.56066	0.0773325	1.12378	-0.821277	0.225168	1	2375346	2375361	16	+
ENSSSCG00000004023	CEP43	1	2094870	2120812	E019	8.5997	0.120357	9.08155	0.0282261	1	4.79077	2.83788	4.72587	4.48507	1.51658	1.32524	0.0395914	-0.151747	1	2120769	2120778	10	-
ENSSSCG00000004023	CEP43	1	2094870	2120812	E015	53.2819	0.0102065	10.2646	0.0164455	0.989811	10.203	9.48858	10.7491	11.1448	0.214812	0.477216	-0.154805	0.1076	1	2116968	2117056	89	-
ENSSSCG00000004024	ENSSSCG00000004024	1	2144307	2164767	E003	2.59107	0.307171	12.4467	0.0059995	0.865502	2.81205	0.846281	1.76644	3.07991	3.46758	3.73071	1.34338	1.60651	1	2146614	2146634	21	+
ENSSSCG00000004024	ENSSSCG00000004024	1	2144307	2164767	E002	10.1253	0.250249	14.3172	0.00250372	0.742858	5.05631	2.38845	3.59141	6.20373	2.17162	2.76665	0.991919	1.58695	1	2145726	2146613	888	+
ENSSSCG00000004027	PDE10A	1	2829411	3392651	E020	15.4485	0.0696391	9.06012	0.0285021	1	6.32144	4.80045	4.91814	6.32708	0.80063	0.803229	0.730304	0.732904	1	3355459	3355609	151	+
ENSSSCG00000004029	QKI	1	4735514	4883392	E011	548.094	0.00457008	7.98098	0.0464065	1	30.7885	29.8474	30.4946	29.3789	0.11042	-0.0557958	0.0342445	-0.131971	1	4883100	4883378	279	-
ENSSSCG00000004032	PRKN	1	5465312	6730872	E001	4.09397	0.157369	8.4265	0.0379726	1	2.84237	1.85414	3.44721	3.12686	1.23446	1.51035	-0.558124	-0.282232	1	5465312	5465517	206	+
ENSSSCG00000004033	AGPAT4	1	6772417	6883551	E004	83.0732	0.00744227	12.5965	0.00559568	0.851655	13.5704	12.2141	11.9856	13.3811	0.317091	0.274626	0.373698	0.331232	1	6864827	6864996	170	+
ENSSSCG00000004041	SLC22A1	1	7340126	7365520	E007	1.11806	0.512935	7.99352	0.0461459	1	2.26989	2.19439	0.00586987	0.850086	0.0977412	-2.73784	17.1921	14.3566	1	7354891	7355000	110	-
ENSSSCG00000004041	SLC22A1	1	7340126	7365520	E008	1.18357	0.33635	12.6922	0.00535179	0.841762	1.73529	2.77881	0.6161	0.488905	-1.36038	-5.01654	2.98889	-0.667276	1	7355238	7355352	115	-
ENSSSCG00000004044	IGF2R	1	7368103	7472548	E016	160.203	0.00453174	9.83516	0.0200206	1	18.1945	17.8265	16.4372	17.9027	0.0639561	0.0133376	0.316013	0.265394	1	7392376	7392495	120	-
ENSSSCG00000004044	IGF2R	1	7368103	7472548	E046	81.6282	0.0113621	11.935	0.00760904	0.898743	13.2745	11.4352	13.2912	13.3595	0.447614	0.466874	-0.00378389	0.0154758	1	7443939	7444063	125	-
ENSSSCG00000004044	IGF2R	1	7368103	7472548	E050	50.7862	0.00986636	10.1348	0.0174541	0.998764	10.5662	9.77594	11.0094	9.58869	0.230415	-0.0571859	-0.122199	-0.4098	1	7472244	7472548	305	-
ENSSSCG00000004044	IGF2R	1	7368103	7472548	E048	25.1364	0.0137962	11.3157	0.0101355	0.929753	7.28114	6.53745	8.24352	6.98562	0.314798	0.193635	-0.363892	-0.485055	1	7453006	7453019	14	-
ENSSSCG00000004044	IGF2R	1	7368103	7472548	E014	145.796	0.00510475	10.8675	0.0124641	0.962011	17.7771	16.8907	16.1288	16.5486	0.159169	-0.0633437	0.30184	0.0793277	1	7391064	7391282	219	-
ENSSSCG00000004044	IGF2R	1	7368103	7472548	E047	59.9619	0.0186374	16.1562	0.00105336	0.640084	11.6408	9.40786	11.5015	11.7365	0.632393	0.656868	0.0359643	0.0604399	1	7452880	7453005	126	-
ENSSSCG00000004049	ACAT2	1	7598735	7612866	E014	226.608	0.00474484	15.9473	0.00116254	0.660987	20.5519	20.6531	21.5004	19.3283	-0.0157388	-0.211139	-0.14511	-0.34051	1	7611851	7611985	135	-
ENSSSCG00000004049	ACAT2	1	7598735	7612866	E018	98.4398	0.0126031	10.7646	0.0130695	0.968437	14.1114	13.7137	14.9152	12.9001	0.08668	-0.184685	-0.168664	-0.440029	1	7612700	7612810	111	-
ENSSSCG00000004058	EZR	1	8403453	8452742	E006	556.767	0.00220553	8.96891	0.0297071	1	30.9138	29.5651	30.1818	30.1387	0.158515	0.0679798	0.0854717	-0.00506342	1	8436293	8436376	84	+
ENSSSCG00000004058	EZR	1	8403453	8452742	E013	2494.36	0.00237443	11.2236	0.0105762	0.936939	50.6657	52.1842	51.0618	52.4697	-0.137985	0.0257939	-0.0361176	0.127661	1	8451807	8452742	936	+
ENSSSCG00000004064	ARID1B	1	9791633	10227502	E020	56.1854	0.0269639	8.08754	0.0442368	1	10.2134	10.435	12.0029	10.2529	-0.0636606	-0.0522143	-0.480934	-0.469488	1	9893445	9893534	90	-
ENSSSCG00000004077	FBXO5	1	13467501	13505928	E004	103.543	0.00490172	9.57552	0.0225414	1	14.1293	13.8635	13.1998	14.5153	0.0576184	0.139584	0.205967	0.287932	1	13476754	13476936	183	+
ENSSSCG00000004081	ENSSSCG00000004081	1	13715174	13932123	E026	17.8427	0.0807418	10.5253	0.0145905	0.9769	4.55026	5.79623	6.80902	4.609	-0.703254	-0.666045	-1.1728	-1.13559	1	13887076	13887249	174	+
ENSSSCG00000004081	ENSSSCG00000004081	1	13715174	13932123	E059	18.3604	0.0490249	8.20555	0.0419492	1	5.93753	5.66198	5.69634	3.82049	0.138334	-1.14178	0.120729	-1.15938	1	13931466	13932123	658	+
ENSSSCG00000004082	ENSSSCG00000004082	1	14028859	14201706	E038	61.6582	0.00971401	10.1357	0.017447	0.998764	11.1023	11.2105	9.90254	9.60901	-0.0289209	-0.457478	0.339555	-0.0890023	1	14114317	14114471	155	+
ENSSSCG00000004082	ENSSSCG00000004082	1	14028859	14201706	E049	110.671	0.00644847	8.51611	0.0364668	1	14.1905	13.6535	15.448	14.4211	0.116972	0.16598	-0.259082	-0.210074	1	14156376	14156538	163	+
ENSSSCG00000004082	ENSSSCG00000004082	1	14028859	14201706	E005	55.6879	0.0145487	9.16834	0.0271345	1	9.8892	10.7046	9.10943	10.69	-0.23501	-0.00405908	0.24263	0.473581	1	14038691	14038852	162	+
ENSSSCG00000004082	ENSSSCG00000004082	1	14028859	14201706	E004	56.0888	0.0120525	9.69509	0.0213439	1	9.53054	10.2986	10.2578	11.4604	-0.229432	0.318048	-0.217675	0.329806	1	14038312	14038479	168	+
ENSSSCG00000004087	CCDC170	1	14657359	14751051	E011	15.4391	0.0643364	8.1794	0.0424459	1	6.67506	5.30804	5.66247	4.82205	0.667457	-0.278947	0.479467	-0.466937	1	14720332	14720460	129	-
ENSSSCG00000004089	RMND1	1	14795674	14855069	E008	34.6349	0.0250824	9.84207	0.0199574	1	9.0385	7.19906	8.73686	8.40087	0.667941	0.452615	0.0999783	-0.115349	1	14813380	14813455	76	+
ENSSSCG00000004092	MTHFD1L	1	15140899	15329986	E020	29.9497	0.0201637	9.98922	0.018658	1	8.77698	7.87321	6.73809	7.67211	0.319282	-0.0758496	0.774837	0.379706	1	15266274	15266348	75	-
ENSSSCG00000004092	MTHFD1L	1	15140899	15329986	E019	42.3793	0.0148388	8.56095	0.0357354	1	9.47651	10.1607	8.47435	8.8484	-0.206272	-0.408536	0.329363	0.127099	1	15264020	15264122	103	-
ENSSSCG00000004105	NUP43	1	16249546	16267624	E014	184.632	0.00832367	8.78901	0.0322317	1	18.672	19.0428	17.588	19.4	-0.0619873	0.0587729	0.187357	0.308117	1	16265089	16266335	1247	+
ENSSSCG00000004105	NUP43	1	16249546	16267624	E005	14.2483	0.0685237	7.82563	0.0497562	1	5.29044	4.99567	6.65136	4.87153	0.166575	-0.0730789	-0.666731	-0.906385	1	16251696	16251838	143	+
ENSSSCG00000004113	STXBP5	1	18345363	18513252	E024	68.2094	0.00710915	12.8724	0.00492081	0.82965	11.6702	11.3638	9.93832	10.9786	0.0794413	-0.102788	0.47774	0.29551	1	18415735	18415807	73	-
ENSSSCG00000004114	ADGB	1	18870884	19029417	E035	3.63271	0.27075	7.81656	0.049959	1	3.32303	3.17726	2.22469	1.51103	0.129797	-2.1475	1.16012	-1.11717	1	19005027	19005183	157	-
ENSSSCG00000004114	ADGB	1	18870884	19029417	E006	7.09106	0.0462053	8.96968	0.0296967	1	3.19643	3.75856	3.70041	4.68108	-0.468935	0.636299	-0.423779	0.681456	1	18883143	18883316	174	-
ENSSSCG00000004114	ADGB	1	18870884	19029417	E026	2.94959	0.257551	8.87373	0.0310177	1	2.87921	2.86191	0.940757	2.48652	0.0174228	-0.406467	3.23039	2.8065	1	18965898	18966072	175	-
ENSSSCG00000004123	UTRN	1	20514260	21048484	E027	141.486	0.0061112	8.54356	0.0360172	1	15.6101	16.5178	17.1554	17.2163	-0.17409	0.128399	-0.29148	0.0110084	1	20659217	20659373	157	-
ENSSSCG00000004123	UTRN	1	20514260	21048484	E005	81.8117	0.00732293	10.9161	0.0121884	0.959503	12.1123	13.9646	12.424	12.7047	-0.428942	-0.285584	-0.076222	0.067136	1	20525842	20525931	90	-
ENSSSCG00000004123	UTRN	1	20514260	21048484	E078	56.2558	0.0093638	8.85986	0.0312134	1	11.3332	9.86751	11.0254	10.5358	0.411411	0.194286	0.0820694	-0.135056	1	20935347	20935408	62	-
ENSSSCG00000004123	UTRN	1	20514260	21048484	E007	103.223	0.00715445	9.65193	0.0217688	1	13.5216	15.2402	13.9257	14.5608	-0.363939	-0.139228	-0.089172	0.135539	1	20528195	20528303	109	-
ENSSSCG00000004123	UTRN	1	20514260	21048484	E006	30.6131	0.0267395	9.39105	0.0245191	1	7.20463	8.78535	8.2699	7.2614	-0.581994	-0.559031	-0.404183	-0.38122	1	20525932	20525934	3	-
ENSSSCG00000004134	PEX3	1	21766000	21802182	E015	68.7992	0.00498621	11.8019	0.00809355	0.908484	11.0812	11.6892	12.6524	11.7834	-0.159396	0.0239905	-0.396747	-0.213361	1	21801303	21801543	241	-
ENSSSCG00000004136	AIG1	1	21913239	22165083	E015	108.899	0.010272	9.4466	0.0239063	1	15.3281	13.6686	15.3792	14.1029	0.348839	0.094823	-0.0101837	-0.2642	1	22164728	22164893	166	-
ENSSSCG00000004139	ADGRG6	1	22662022	22801848	E031	2.83029	0.16111	9.18517	0.0269276	1	3.03778	2.88408	2.04058	1.23589	0.150166	-2.44771	1.15001	-1.44787	1	22801825	22801848	24	-
ENSSSCG00000004139	ADGRG6	1	22662022	22801848	E014	20.6355	0.019449	9.00989	0.0291597	1	6.29824	6.82606	5.55377	7.28468	-0.234852	0.190095	0.366333	0.79128	1	22700074	22700214	141	-
ENSSSCG00000004157	IL20RA	1	27137558	27172720	E007	177.371	0.0089767	8.06672	0.0446528	1	18.2338	18.3067	17.4108	18.9872	-0.0125085	0.114855	0.144325	0.271689	1	27171226	27172720	1495	+
ENSSSCG00000004160	PEX7	1	27257011	27346515	E003	74.6594	0.00484918	9.55861	0.0227159	1	11.8052	12.2412	11.6675	12.9701	-0.10862	0.173855	0.0350832	0.317557	1	27313799	27313854	56	-
ENSSSCG00000004160	PEX7	1	27257011	27346515	E004	99.3037	0.00335801	8.13986	0.0432079	1	13.5211	13.8011	13.8565	14.7185	-0.062035	0.195605	-0.0741718	0.183468	1	27315337	27315450	114	-
ENSSSCG00000004160	PEX7	1	27257011	27346515	E002	84.0744	0.00366255	9.72323	0.0210714	1	12.5591	13.4895	12.2303	13.3454	-0.215406	-0.0324543	0.0796399	0.262591	1	27288176	27288275	100	-
ENSSSCG00000004160	PEX7	1	27257011	27346515	E013	94.7142	0.00363592	9.59703	0.0223212	1	14.0615	13.4285	14.3952	13.0039	0.139508	-0.0969449	-0.0712793	-0.307732	1	27345927	27346515	589	-
ENSSSCG00000004163	BCLAF1	1	27872183	27902974	E012	79.9965	0.0157535	10.7058	0.0134281	0.968875	12.979	13.051	13.1704	11.2399	-0.0166748	-0.447761	-0.0441369	-0.475223	1	27891409	27891571	163	+
ENSSSCG00000004163	BCLAF1	1	27872183	27902974	E008	253.834	0.00354721	12.2192	0.00666891	0.888582	22.5991	21.3813	21.1046	21.2298	0.17983	-0.0229241	0.221808	0.0190533	1	27884425	27884594	170	+
ENSSSCG00000004166	AHI1	1	28566266	28760468	E013	27.7746	0.0191874	8.76505	0.0325834	1	7.8305	7.10705	6.85585	8.07452	0.283833	0.373857	0.389002	0.479026	1	28608494	28608640	147	+
ENSSSCG00000004166	AHI1	1	28566266	28760468	E018	29.3802	0.0344411	8.61236	0.0349144	1	7.68373	6.78182	8.13818	8.4573	0.365246	0.646788	-0.168543	0.112998	1	28625040	28625158	119	+
ENSSSCG00000004178	SLC18B1	1	30923765	30954260	E002	6.25655	0.296437	8.33789	0.0395212	1	4.94011	2.49917	2.71475	3.91642	1.97313	1.29965	1.73396	1.06048	1	30923775	30923995	221	+
ENSSSCG00000004178	SLC18B1	1	30923765	30954260	E003	25.2473	0.0425771	10.8279	0.0126937	0.965659	8.36998	6.31557	6.59988	7.38283	0.824135	0.456103	0.695678	0.327645	1	30933953	30934288	336	+
ENSSSCG00000004178	SLC18B1	1	30923765	30954260	E013	18.8836	0.0416059	10.8977	0.0122921	0.96017	6.24409	7.32763	6.1225	5.43002	-0.467328	-0.874024	0.0573132	-0.349383	1	30949558	30949653	96	+
ENSSSCG00000004191	MOXD1	1	31282506	31367779	E016	212.874	0.0268455	19.2599	0.000241572	0.449145	16.0054	18.0322	17.3649	18.67	-0.37004	0.1091	-0.252352	0.226788	1	31365941	31367779	1839	+
ENSSSCG00000004191	MOXD1	1	31282506	31367779	E001	25.9074	0.0163204	10.7419	0.0132068	0.968437	5.80753	6.89656	7.76774	6.02452	-0.501187	-0.394365	-0.849298	-0.742475	1	31282506	31282535	30	+
ENSSSCG00000004192	CCN2	1	31674394	31677691	E002	2638.37	0.00392062	11.933	0.0076161	0.898743	53.3433	52.9042	52.5506	51.6779	0.0394998	-0.110845	0.071373	-0.0789723	1	31674805	31675027	223	+
ENSSSCG00000004192	CCN2	1	31674394	31677691	E001	1864.84	0.00711109	14.288	0.0025382	0.742858	48.1284	48.1892	47.3585	45.1089	-0.00564505	-0.289668	0.0717688	-0.212254	1	31674394	31674679	286	+
ENSSSCG00000004193	ENPP1	1	31722721	31796595	E020	241.866	0.00211769	8.28973	0.0403884	1	21.2746	20.8336	21.695	20.4464	0.0673782	-0.0601201	-0.0632156	-0.190714	1	31750623	31750688	66	-
ENSSSCG00000004193	ENPP1	1	31722721	31796595	E029	286.731	0.00787973	8.91579	0.0304317	1	24.4016	22.7875	22.7318	21.4606	0.225791	-0.195006	0.233791	-0.187006	1	31796340	31796595	256	-
ENSSSCG00000004193	ENPP1	1	31722721	31796595	E008	252.946	0.00322432	7.90943	0.0479211	1	20.7958	21.6778	20.3344	22.3233	-0.133853	0.0952681	0.0718473	0.300968	1	31732064	31732144	81	-
ENSSSCG00000004193	ENPP1	1	31722721	31796595	E021	286.357	0.00347017	9.91084	0.0193394	1	22.9795	22.3493	23.6591	21.9916	0.0908859	-0.0524665	-0.095883	-0.239235	1	31752223	31752332	110	-
ENSSSCG00000004195	ARG1	1	32006046	32028988	E013	149.442	0.0852265	8.69397	0.033649	1	18.2144	14.4942	16.5705	13.8996	0.705125	-0.127255	0.294475	-0.537904	1	32028933	32028988	56	-
ENSSSCG00000004196	MED23	1	31959934	32001581	E017	52.6733	0.013866	9.22817	0.0264062	1	11.1245	9.38788	10.0857	10.4772	0.503295	0.325018	0.291239	0.112962	1	31979515	31979658	144	+
ENSSSCG00000004199	EPB41L2	1	32418217	32630638	E013	289.297	0.00428837	9.05196	0.028608	1	23.9748	22.0796	23.0557	23.0339	0.270108	0.138143	0.128866	-0.00309934	1	32572480	32572567	88	+
ENSSSCG00000004201	TMEM200A	1	32961754	33033019	E001	59.317	0.0430422	8.01331	0.0457375	1	10.2547	10.4044	11.3135	10.6364	-0.0429887	0.065487	-0.292196	-0.18372	1	32961754	32965119	3366	-
ENSSSCG00000004203	L3MBTL3	1	33198301	33319399	E020	52.3807	0.0187283	9.6436	0.0218517	1	9.96614	10.6174	11.4229	9.45634	-0.187753	-0.343029	-0.405491	-0.560767	1	33284326	33284458	133	-
ENSSSCG00000004205	ARHGAP18	1	33527734	33717966	E001	1.17681	0.235066	22.4889	5.1605e-05	0.250963	2.55648	0.621628	1.78947	0.00920595	4.08242	-12.1548	1.03052	-15.2067	1	33527734	33528217	484	+
ENSSSCG00000004205	ARHGAP18	1	33527734	33717966	E003	92.9695	0.0216816	8.49314	0.0368471	1	14.0049	12.9531	14.9554	12.7625	0.23602	-0.044619	-0.199889	-0.480528	1	33583451	33583605	155	+
ENSSSCG00000004205	ARHGAP18	1	33527734	33717966	E022	23.3692	0.029859	11.3684	0.00989191	0.929753	5.69576	7.7145	6.58791	7.3066	-0.885705	-0.159084	-0.424047	0.302573	1	33717966	33717966	1	+
ENSSSCG00000004209	PTPRK	1	34693368	35258699	E034	84.5035	0.00606126	7.97412	0.0465495	1	13.6616	13.1306	12.0664	13.3508	0.119789	0.0501935	0.373834	0.304238	1	35229991	35230088	98	+
ENSSSCG00000004217	RNF146	1	35909575	35926968	E005	9.00558	0.055396	9.05777	0.0285326	1	4.88531	4.8152	3.46258	3.69758	0.0419684	-0.765671	0.997752	0.190112	1	35914525	35914534	10	-
ENSSSCG00000004222	NCOA7	1	37043805	37193958	E024	10.3653	0.0554605	14.7708	0.00202334	0.710454	5.26055	3.50523	4.31549	5.11871	1.17729	1.09786	0.574843	0.495412	1	37182729	37182851	123	-
ENSSSCG00000004222	NCOA7	1	37043805	37193958	E006	74.7757	0.00397621	8.87679	0.0309747	1	11.9983	11.6582	11.9196	13.0698	0.0860097	0.343025	0.019689	0.276704	1	37046145	37046174	30	-
ENSSSCG00000004237	SERINC1	1	40099328	40141541	E011	479.404	0.00451679	8.72793	0.0331357	1	29.3302	27.5621	28.7467	28.4648	0.216335	0.11158	0.0704048	-0.0343508	1	40137413	40137557	145	+
ENSSSCG00000004237	SERINC1	1	40099328	40141541	E006	655.654	0.0031098	12.042	0.00724079	0.898743	33.0462	31.1518	32.5202	32.7769	0.214527	0.184499	0.0587986	0.0287696	1	40119735	40119904	170	+
ENSSSCG00000004237	SERINC1	1	40099328	40141541	E021	7.60931	0.0387658	10.6049	0.0140657	0.973429	3.11975	4.10253	3.80189	4.77006	-0.792877	0.437255	-0.572374	0.657758	1	40141538	40141541	4	+
ENSSSCG00000004237	SERINC1	1	40099328	40141541	E012	548.291	0.00166903	8.24159	0.0412739	1	30.7442	29.9885	30.2261	29.5867	0.088577	-0.0476707	0.0605732	-0.0756745	1	40137669	40137814	146	+
ENSSSCG00000004238	HSF2	1	40147164	40180297	E013	42.9101	0.0164405	8.15232	0.0429663	1	9.96723	8.48449	9.14259	9.68004	0.475153	0.388645	0.25518	0.168673	1	40168124	40168232	109	-
ENSSSCG00000004238	HSF2	1	40147164	40180297	E001	5.68546	0.12906	8.29695	0.0402571	1	2.62816	4.27747	3.79016	2.91247	-1.40976	-1.11278	-1.05926	-0.762283	1	40147164	40147270	107	-
ENSSSCG00000004244	MAN1A1	1	42729722	42896283	E010	153.126	0.00454747	9.59267	0.0223657	1	17.2498	16.8484	16.3529	17.8541	0.073105	0.180437	0.165435	0.272767	1	42885957	42886176	220	+
ENSSSCG00000004245	FAM184A	1	43003390	43113631	E004	1.8836	0.220566	14.7575	0.00203605	0.710454	2.5726	0.803799	2.04495	2.24318	3.35893	2.96295	0.663257	0.267277	1	43044715	43045569	855	+
ENSSSCG00000004246	ENSSSCG00000004246	1	43171892	43198710	E006	26.5517	0.0411869	8.13693	0.043265	1	6.47563	6.94856	8.54504	7.65644	-0.205811	0.283864	-0.811995	-0.32232	1	43192007	43192207	201	+
ENSSSCG00000004246	ENSSSCG00000004246	1	43171892	43198710	E004	27.0933	0.0224144	8.10618	0.0438675	1	8.21922	6.71063	7.17899	7.6736	0.593702	0.392199	0.39655	0.195046	1	43183873	43184189	317	+
ENSSSCG00000004253	GOPC	1	44239383	44287198	E003	221.79	0.0038315	17.2903	0.000615932	0.535719	21.1361	19.6624	21.2436	19.5863	0.231056	-0.0123179	-0.0163351	-0.259709	1	44239392	44239894	503	+
ENSSSCG00000004254	DCBLD1	1	44276675	44373687	E002	603.701	0.00528496	18.5991	0.000330861	0.493219	30.7934	32.7922	29.8223	31.2306	-0.227683	-0.177119	0.11396	0.164523	1	44301115	44303165	2051	-
ENSSSCG00000004261	ENSSSCG00000004261	1	44899219	44899545	E002	45.7461	0.149072	9.85793	0.0198132	1	9.68366	9.62007	9.68375	9.61048	0.0194789	-0.00294761	-2.72523e-05	-0.0224538	1	44899366	44899545	180	+
ENSSSCG00000004262	KPNA5	1	44900497	44938947	E002	10.0394	0.0512963	7.97806	0.0464673	1	4.81213	4.98739	3.38354	4.74845	-0.103875	-0.142549	1.02076	0.98209	1	44910892	44911059	168	-
ENSSSCG00000004263	ZUP1	1	44939951	44961145	E003	36.8505	0.0245422	18.0706	0.000425354	0.508054	8.91177	9.16856	9.59936	7.2382	-0.0837372	-0.694208	-0.219305	-0.829775	1	44940049	44940174	126	+
ENSSSCG00000004274	COL9A1	1	50403361	50498332	E041	4000.94	0.00640594	13.2504	0.00412516	0.800674	60.2203	58.3338	59.1668	57.9387	0.164801	-0.0346738	0.0918772	-0.107598	1	50498177	50498332	156	-
ENSSSCG00000004274	COL9A1	1	50403361	50498332	E040	3997.26	0.00639986	13.3207	0.00399199	0.800136	60.5369	58.2836	58.9042	58.097	0.196744	-0.0163675	0.142383	-0.0707288	1	50497607	50497680	74	-
ENSSSCG00000004274	COL9A1	1	50403361	50498332	E039	4548.74	0.00743507	10.8656	0.0124754	0.962011	62.7228	60.3371	60.7659	60.807	0.206658	0.04084	0.169388	0.00356952	1	50496036	50496113	78	-
ENSSSCG00000004274	COL9A1	1	50403361	50498332	E030	3636.88	0.00500695	7.83699	0.0495034	1	57.9625	57.5355	57.1449	56.7135	0.0375367	-0.0724644	0.0719436	-0.0380575	1	50467059	50467112	54	-
ENSSSCG00000004274	COL9A1	1	50403361	50498332	E038	6842.07	0.00693554	11.4453	0.00954611	0.926392	69.6019	66.9436	67.4129	68.3333	0.22579	0.118218	0.185819	0.0782473	1	50495770	50495902	133	-
ENSSSCG00000004275	FAM135A	1	50579715	50716357	E021	69.9077	0.0192652	12.3226	0.00635584	0.880972	12.056	10.3365	11.5282	13.171	0.458642	0.724538	0.133903	0.399799	1	50692871	50693542	672	+
ENSSSCG00000004279	OGFRL1	1	51313016	51332327	E015	77.2893	0.016498	10.606	0.014059	0.973429	11.4018	13.8863	12.6802	11.8964	-0.592648	-0.465743	-0.318317	-0.191412	1	51327291	51328523	1233	+
ENSSSCG00000004289	CEP162	1	53332436	53442399	E003	12.3141	0.0275094	7.9894	0.0462314	1	5.02709	4.6416	4.48018	5.88043	0.231626	0.687579	0.33432	0.790274	1	53361605	53361703	99	-
ENSSSCG00000004293	SNX14	1	54460640	54547216	E001	20.8481	0.0470203	10.737	0.0132366	0.968437	5.50524	7.71201	6.98039	5.95027	-0.983739	-0.757492	-0.692039	-0.465792	1	54460640	54460643	4	-
ENSSSCG00000004293	SNX14	1	54460640	54547216	E034	0.852884	0.257601	11.8467	0.00792725	0.908484	1.9998	0.609972	0.0386313	1.57777	3.42747	2.74295	11.3894	10.7049	1	54547212	54547216	5	-
ENSSSCG00000004294	SYNCRIP	1	54563114	54598407	E002	998.255	0.00384494	8.44069	0.0377301	1	37.2839	39.2734	37.4423	37.8252	-0.204213	-0.148107	-0.0164612	0.0396445	1	54567032	54567749	718	-
ENSSSCG00000004303	RARS2	1	55893480	55982068	E013	37.4398	0.0155524	8.01648	0.0456724	1	9.17844	8.87377	7.58026	9.06541	0.0994986	0.0629597	0.562215	0.525676	1	55912106	55912182	77	-
ENSSSCG00000004303	RARS2	1	55893480	55982068	E016	59.229	0.00810417	13.9376	0.00299136	0.760496	9.79331	10.5572	11.5921	11.4771	-0.222637	0.24876	-0.501189	-0.0297922	1	55918578	55918684	107	-
ENSSSCG00000004303	RARS2	1	55893480	55982068	E001	4.94378	0.244666	8.94978	0.0299661	1	2.74647	4.66194	2.32268	2.41787	-1.53213	-1.90046	0.484393	0.116059	1	55893480	55893640	161	-
ENSSSCG00000004311	RNGTT	1	56852866	57061972	E020	88.7371	0.00698586	8.57354	0.0355326	1	13.617	12.4521	13.7923	13.3049	0.269572	0.199468	-0.0387121	-0.108816	1	57061705	57061955	251	-
ENSSSCG00000004311	RNGTT	1	56852866	57061972	E002	332.388	0.00878107	9.49527	0.0233818	1	23.4038	25.0653	23.3191	25.3281	-0.227807	0.0349973	0.0119264	0.274731	1	56852873	56854613	1741	-
ENSSSCG00000004311	RNGTT	1	56852866	57061972	E005	92.7841	0.00916893	7.85823	0.0490344	1	13.0355	12.9557	14.4054	14.1097	0.0185085	0.258045	-0.302562	-0.0630249	1	56857057	56857180	124	-
ENSSSCG00000004311	RNGTT	1	56852866	57061972	E010	54.6396	0.00634937	8.93193	0.0302097	1	11.1103	10.3049	10.2806	9.8878	0.223686	-0.122422	0.230689	-0.11542	1	56987430	56987501	72	-
ENSSSCG00000004322	ANKRD6	1	57438000	57645957	E020	5.29663	0.0778149	7.99809	0.0460511	1	2.90314	3.48674	2.33689	3.7234	-0.529956	0.190143	0.627182	1.34728	1	57636791	57636904	114	+
ENSSSCG00000004328	MDN1	1	57660224	57826350	E102	14.6659	0.0810499	10.799	0.0128637	0.968057	6.27262	4.50139	6.25275	4.56864	0.96469	0.0430251	0.00925156	-0.912413	1	57800752	57800994	243	-
ENSSSCG00000004328	MDN1	1	57660224	57826350	E095	9.38644	0.088026	9.9739	0.0187893	1	5.02826	4.79946	4.39964	3.1795	0.135235	-1.19309	0.387612	-0.940713	1	57785642	57785737	96	-
ENSSSCG00000004328	MDN1	1	57660224	57826350	E101	9.90205	0.168015	12.8267	0.00502683	0.829842	5.13974	3.17339	5.4708	3.66234	1.39759	0.414761	-0.181455	-1.16429	1	57800378	57800509	132	-
ENSSSCG00000004328	MDN1	1	57660224	57826350	E069	24.0513	0.0190815	10.4374	0.0151919	0.981223	7.56621	6.88987	5.99388	7.75297	0.273921	0.345368	0.6803	0.751748	1	57744759	57744956	198	-
ENSSSCG00000004328	MDN1	1	57660224	57826350	E041	22.5999	0.0181323	15.2281	0.00163173	0.703347	6.61405	6.73879	7.92216	5.83287	-0.0545468	-0.420915	-0.527978	-0.894346	1	57706687	57706922	236	-
ENSSSCG00000004328	MDN1	1	57660224	57826350	E096	8.91242	0.135124	8.73906	0.0329692	1	5.00296	4.55371	4.18935	3.16836	0.273117	-1.05071	0.514968	-0.808857	1	57788272	57788352	81	-
ENSSSCG00000004328	MDN1	1	57660224	57826350	E099	7.87703	0.0915468	13.0312	0.00456972	0.815098	4.40152	2.46381	4.21123	4.79069	1.67931	1.92515	0.128142	0.373978	1	57794150	57794264	115	-
ENSSSCG00000004328	MDN1	1	57660224	57826350	E040	14.5231	0.0378125	9.58417	0.0224526	1	5.81381	5.21414	6.26933	4.45125	0.316641	-0.459252	-0.219753	-0.995645	1	57705711	57705806	96	-
ENSSSCG00000004328	MDN1	1	57660224	57826350	E039	18.1846	0.021357	10.6109	0.0140272	0.972595	6.37601	5.48345	6.98477	5.49848	0.439182	0.0079601	-0.266224	-0.697445	1	57704971	57705065	95	-
ENSSSCG00000004328	MDN1	1	57660224	57826350	E100	7.9502	0.115108	8.57659	0.0354837	1	4.26577	2.78463	4.59532	4.37607	1.23464	1.30866	-0.215837	-0.141812	1	57795911	57796014	104	-
ENSSSCG00000004331	CASP8AP2	1	57835145	57862473	E001	8.68013	0.0344116	14.9813	0.00183268	0.710137	3.98137	5.34421	3.64081	3.51486	-0.854284	-1.21522	0.259002	-0.101931	1	57835145	57835241	97	+
ENSSSCG00000004334	MAP3K7	1	58481956	58548057	E003	48.939	0.0271171	8.24321	0.0412438	1	8.83729	10.9763	10.0051	9.93962	-0.641556	-0.294498	-0.366512	-0.0194542	1	58482082	58482323	242	-
ENSSSCG00000004334	MAP3K7	1	58481956	58548057	E023	121.24	0.00275279	10.057	0.0180882	1	14.7136	16.0106	15.0514	15.7126	-0.258815	-0.0577877	-0.069286	0.131741	1	58528805	58528943	139	-
ENSSSCG00000004336	EPHA7	1	60771572	60944038	E007	1.10395	0.408725	7.83726	0.0494976	1	0.591349	1.1595	2.03383	1.92602	-1.94324	1.46513	-3.56569	-0.157322	1	60790195	60790380	186	-
ENSSSCG00000004336	EPHA7	1	60771572	60944038	E008	0.972085	0.480776	9.72195	0.0210838	1	0.0135948	1.62272	2.17442	0.980427	-13.7994	-1.45451	-14.6447	-2.29974	1	60791233	60791358	126	-
ENSSSCG00000004339	UFL1	1	63638596	63700476	E014	77.2444	0.0052044	9.78947	0.0204432	1	13.2019	12.3378	12.6328	11.7613	0.203687	-0.143358	0.132717	-0.214327	1	63672824	63672990	167	+
ENSSSCG00000004344	MMS22L	1	64306073	64459904	E003	11.9091	0.0425921	8.5828	0.0353841	1	4.804	4.39249	4.46817	6.05552	0.259842	0.933065	0.210291	0.883513	1	64312351	64312447	97	-
ENSSSCG00000004344	MMS22L	1	64306073	64459904	E011	19.4604	0.0252092	8.48585	0.0369685	1	6.79442	6.37735	6.52838	5.19449	0.184884	-0.59718	0.116604	-0.66546	1	64348162	64348355	194	-
ENSSSCG00000004344	MMS22L	1	64306073	64459904	E004	15.9581	0.0237153	16.3539	0.000959419	0.625866	5.12132	5.0625	6.05815	6.98378	0.0335584	0.937157	-0.488727	0.414872	1	64323990	64324153	164	-
ENSSSCG00000004349	COQ3	1	66232181	66346575	E013	165.449	0.00269535	9.81701	0.0201874	1	16.9828	17.5283	18.2251	18.0759	-0.0983169	0.0961022	-0.220175	-0.0257558	1	66336420	66336572	153	-
ENSSSCG00000004349	COQ3	1	66232181	66346575	E005	32.6606	0.0395199	9.11701	0.0277749	1	9.58773	7.96721	7.4154	7.64443	0.545074	-0.121252	0.755411	0.089086	1	66302684	66302819	136	-
ENSSSCG00000004358	ASCC3	1	67331948	67657085	E008	95.5825	0.00699892	8.80367	0.0320183	1	13.3233	14.5292	12.9924	14.1432	-0.26273	-0.0818848	0.0758746	0.25672	1	67400443	67400577	135	-
ENSSSCG00000004358	ASCC3	1	67331948	67657085	E036	49.5324	0.0134132	9.07375	0.0283262	1	10.951	9.5409	10.2483	9.44991	0.408731	-0.0283089	0.197041	-0.239999	1	67576479	67576604	126	-
ENSSSCG00000004358	ASCC3	1	67331948	67657085	E038	77.1181	0.0166755	7.82579	0.0497526	1	13.3254	12.3671	12.4932	11.6216	0.22469	-0.18619	0.194245	-0.216635	1	67578059	67578266	208	-
ENSSSCG00000004358	ASCC3	1	67331948	67657085	E033	66.2662	0.00505978	11.4704	0.00943617	0.925506	12.3117	10.6278	11.595	11.7572	0.439059	0.30103	0.179569	0.0415406	1	67523537	67523701	165	-
ENSSSCG00000004358	ASCC3	1	67331948	67657085	E003	139.168	0.00700558	8.54619	0.0359745	1	15.4958	17.2516	16.4062	16.6657	-0.331408	-0.107197	-0.175701	0.0485107	1	67332836	67333011	176	-
ENSSSCG00000004358	ASCC3	1	67331948	67657085	E007	127.675	0.00655284	8.7995	0.0320788	1	15.6414	16.7212	14.8219	15.871	-0.205809	-0.161038	0.164726	0.209497	1	67363177	67363401	225	-
ENSSSCG00000004358	ASCC3	1	67331948	67657085	E037	60.2572	0.00693297	22.1934	5.94585e-05	0.269337	12.1623	10.487	11.4972	10.0118	0.442049	-0.137519	0.168233	-0.411335	1	67577201	67577342	142	-
ENSSSCG00000004358	ASCC3	1	67331948	67657085	E009	75.3648	0.00548801	19.8479	0.00018252	0.424577	11.7053	13.0536	11.1218	13.1523	-0.327254	0.022709	0.15261	0.502574	1	67400776	67400887	112	-
ENSSSCG00000004368	PREP	1	71496306	71636747	E014	142.093	0.00271805	8.21182	0.041831	1	17.3933	16.2048	16.6778	16.2411	0.219287	0.00690497	0.130399	-0.0819828	1	71601694	71601903	210	-
ENSSSCG00000004368	PREP	1	71496306	71636747	E005	154.674	0.00426048	8.61331	0.0348995	1	16.9962	17.6771	17.9845	16.6405	-0.122241	-0.187784	-0.176109	-0.241652	1	71499964	71500120	157	-
ENSSSCG00000004369	PRDM1	1	72311880	72335466	E011	176.54	0.0153293	8.75907	0.0326718	1	17.3055	19.7035	17.9465	18.386	-0.407803	-0.21854	-0.113456	0.0758074	1	72334651	72335466	816	+
ENSSSCG00000004369	PRDM1	1	72311880	72335466	E008	322.709	0.00475337	9.59436	0.0223484	1	24.9157	23.4409	24.2196	24.0334	0.202528	0.0824703	0.0944513	-0.0256061	1	72330521	72331641	1121	+
ENSSSCG00000004371	CRYBG1	1	72552922	72763546	E005	202.835	0.00951951	11.834	0.00797394	0.908484	20.6544	18.7278	19.2245	18.9995	0.311002	0.0454194	0.228387	-0.0371956	1	72706053	72708342	2290	+
ENSSSCG00000004373	RTN4IP1	1	72762855	72815540	E022	106.706	0.0124481	9.9769	0.0187635	1	14.4346	13.3813	15.6602	14.602	0.229723	0.264838	-0.249103	-0.213988	1	72814871	72815502	632	-
ENSSSCG00000004373	RTN4IP1	1	72762855	72815540	E014	2.79131	0.124787	10.0289	0.0183221	1	3.15068	1.557	2.62417	1.96968	2.03665	0.678928	0.528767	-0.828954	1	72780294	72780374	81	-
ENSSSCG00000004382	SEC63	1	74000688	74078582	E019	167.158	0.00420962	8.43927	0.0377543	1	18.6179	18.1486	18.0526	17.1157	0.080154	-0.182797	0.0967752	-0.166176	1	74039575	74039636	62	-
ENSSSCG00000004384	NR2E1	1	74271042	74292681	E004	3.02214	0.190459	10.712	0.0133899	0.968875	2.71168	1.95343	1.48927	3.48596	0.947708	1.67428	1.73112	2.4577	1	74281432	74281667	236	+
ENSSSCG00000004384	NR2E1	1	74271042	74292681	E005	2.32874	0.138456	9.35115	0.0249688	1	2.88475	1.54258	1.66729	2.30465	1.80848	1.15954	1.584	0.935057	1	74283242	74283388	147	+
ENSSSCG00000004384	NR2E1	1	74271042	74292681	E003	2.43314	0.177347	9.62225	0.0220658	1	1.5683	2.57983	1.48506	2.72117	-1.43775	0.154191	0.157462	1.7494	1	74279783	74279870	88	+
ENSSSCG00000004385	SNX3	1	74306455	74349335	E003	1180.29	0.000792801	12.0731	0.00713694	0.898743	40.2261	40.1687	39.7193	40.8302	0.00575474	0.0660509	0.0509163	0.111212	1	74307045	74307209	165	-
ENSSSCG00000004385	SNX3	1	74306455	74349335	E002	879.787	0.0015412	13.8271	0.00315015	0.760496	35.8201	36.0814	35.532	37.0332	-0.0277145	0.10005	0.0306812	0.158446	1	74306939	74307044	106	-
ENSSSCG00000004387	FOXO3	1	74628218	74760325	E002	412.484	0.0063515	9.9396	0.0190866	1	26.6084	26.1312	26.6148	25.3311	0.0615077	-0.104955	-0.000821009	-0.167284	1	74629560	74630312	753	+
ENSSSCG00000004388	ARMC2	1	74923868	75043060	E015	3.50983	0.0870369	8.66515	0.0340907	1	2.05884	2.28351	3.60508	2.92002	-0.299218	0.710712	-1.61975	-0.609817	1	75019089	75019407	319	+
ENSSSCG00000004403	CDC40	1	76179164	76232959	E015	90.4627	0.00325438	8.09215	0.0441451	1	13.3349	13.9665	12.646	13.6763	-0.140062	-0.0636261	0.159829	0.236266	1	76231500	76231644	145	+
ENSSSCG00000004411	ZBTB24	1	75531036	75548772	E006	52.5091	0.0184513	8.732	0.0330746	1	10.1158	9.91355	11.5386	9.87377	0.0598232	-0.0119	-0.391421	-0.463145	1	75543962	75544129	168	-
ENSSSCG00000004412	MICAL1	1	75511693	75522765	E022	119.259	0.00774688	8.43384	0.0378469	1	15.2778	14.5855	15.2982	16.0555	0.141642	0.294107	-0.0040826	0.148382	1	75519273	75519428	156	-
ENSSSCG00000004412	MICAL1	1	75511693	75522765	E010	97.1333	0.0061177	11.5825	0.00895928	0.919103	14.6633	13.9719	12.6982	13.9056	0.146853	-0.0144279	0.435535	0.274254	1	75514195	75514271	77	-
ENSSSCG00000004414	CD164	1	75441575	75458145	E005	722.996	0.0012142	7.9025	0.0480704	1	33.7799	33.2491	34.1164	33.4736	0.0585692	0.0248327	-0.0368542	-0.0705907	1	75446020	75446076	57	-
ENSSSCG00000004415	ENSSSCG00000004415	1	75323639	75431569	E029	1.87466	0.347762	9.64455	0.0218423	1	0.591457	2.31241	2.2323	2.0207	-3.93602	-0.389557	-3.83415	-0.287691	1	75417618	75417749	132	+
ENSSSCG00000004420	TRAF3IP2	1	77487577	77541198	E003	29.1701	0.011165	8.67662	0.0339142	1	7.07066	7.8358	7.28916	8.2604	-0.300824	0.154871	-0.0890164	0.366679	1	77496129	77496245	117	-
ENSSSCG00000004420	TRAF3IP2	1	77487577	77541198	E002	25.559	0.0112135	13.5665	0.00355877	0.772185	6.33138	7.78785	6.79063	7.65107	-0.605262	-0.0519343	-0.204351	0.348977	1	77491515	77491589	75	-
ENSSSCG00000004420	TRAF3IP2	1	77487577	77541198	E005	15.4623	0.0185993	9.16465	0.02718	1	6.39411	5.42683	5.91697	4.95682	0.477633	-0.263255	0.226013	-0.514875	1	77502698	77502786	89	-
ENSSSCG00000004423	TUBE1	1	78018433	78048406	E011	15.4998	0.0306398	9.28163	0.0257716	1	5.14602	5.86902	6.55343	5.01232	-0.382369	-0.458846	-0.703874	-0.780351	1	78048154	78048227	74	-
ENSSSCG00000004423	TUBE1	1	78018433	78048406	E012	8.45653	0.0516433	10.4141	0.0153553	0.984521	3.84389	4.23962	5.12615	3.33647	-0.283962	-0.693841	-0.835017	-1.2449	1	78048324	78048406	83	-
ENSSSCG00000004425	LAMA4	1	78071458	78224365	E008	217.423	0.00493021	10.1156	0.0176087	0.998764	19.2199	21.0998	20.7227	19.7871	-0.297649	-0.205429	-0.239713	-0.147493	1	78084847	78084956	110	-
ENSSSCG00000004425	LAMA4	1	78071458	78224365	E034	214.432	0.0062987	11.9201	0.00766204	0.898743	20.8638	18.8861	20.2943	20.4272	0.316837	0.24906	0.0886377	0.0208611	1	78149283	78149434	152	-
ENSSSCG00000004425	LAMA4	1	78071458	78224365	E035	184.957	0.00769125	9.19898	0.0267591	1	19.7819	17.8618	18.8625	18.812	0.321774	0.162659	0.150659	-0.008456	1	78151630	78151704	75	-
ENSSSCG00000004432	HDAC2	1	79863094	79901585	E004	1.12839	0.468489	8.15483	0.0429178	1	2.06905	1.3975	1.81963	0.0150778	1.13313	-13.0693	0.371017	-13.8314	1	79870681	79870895	215	-
ENSSSCG00000004456	PGM3	1	83003604	83029897	E005	185.02	0.00429201	8.47461	0.0371567	1	19.6132	18.0353	18.35	18.9791	0.264318	0.160308	0.210112	0.106101	1	83007492	83007676	185	+
ENSSSCG00000004457	DOP1A	1	83026514	83137426	E022	114.066	0.00954679	14.745	0.00204809	0.712026	15.7049	13.7025	15.2629	15.1781	0.415854	0.311251	0.0875471	-0.0170555	1	83061356	83063345	1990	-
ENSSSCG00000004457	DOP1A	1	83026514	83137426	E041	17.909	0.0246163	8.58079	0.0354164	1	5.91448	5.22171	6.36388	6.82404	0.362402	0.779578	-0.21342	0.203756	1	83112604	83112794	191	-
ENSSSCG00000004457	DOP1A	1	83026514	83137426	E027	33.0885	0.0183762	10.1059	0.0176874	0.99904	9.1313	7.49876	8.19938	7.94922	0.578689	0.170976	0.31677	-0.0909433	1	83071639	83072260	622	-
ENSSSCG00000004460	IBTK	1	83973582	84070554	E027	70.8993	0.00811643	16.482	0.000903037	0.623035	10.7908	13.0296	11.7892	11.9309	-0.564238	-0.26458	-0.263905	0.0357538	1	84067432	84067503	72	+
ENSSSCG00000004464	TENT5A	1	84545202	84552134	E003	4670.17	0.00723225	15.6515	0.00133664	0.687832	61.1314	62.8467	60.9704	63.1691	-0.148353	0.027785	0.0139667	0.190105	1	84547419	84552134	4716	+
ENSSSCG00000004464	TENT5A	1	84545202	84552134	E002	808.376	0.00689903	12.2455	0.00658784	0.884322	35.5594	35.1673	35.2405	34.6295	0.0419673	-0.0579836	0.0341135	-0.0658374	1	84545696	84546260	565	+
ENSSSCG00000004464	TENT5A	1	84545202	84552134	E001	272.564	0.00629914	17.3071	0.000611054	0.534171	22.7695	21.765	23.1928	21.9931	0.146878	0.0338112	-0.0603951	-0.173462	1	84545202	84545452	251	+
ENSSSCG00000004465	BCKDHB	1	85755743	86017650	E001	42.9251	0.00727115	10.6811	0.0135812	0.968875	9.21007	9.86514	8.52318	9.9402	-0.203013	0.0224392	0.228284	0.453736	1	85755743	85756101	359	-
ENSSSCG00000004466	TTK	1	86076583	86125718	E031	16.177	0.0227414	11.6376	0.00873369	0.916396	5.8637	4.8687	6.72676	5.48224	0.540632	0.344887	-0.400352	-0.596098	1	86125109	86125130	22	-
ENSSSCG00000004466	TTK	1	86076583	86125718	E033	8.35242	0.0770814	9.78066	0.0205256	1	4.367	3.19529	5.02825	3.80596	0.904777	0.506263	-0.409201	-0.807715	1	86125200	86125202	3	-
ENSSSCG00000004466	TTK	1	86076583	86125718	E032	15.9168	0.0242533	13.7436	0.0032757	0.764246	5.73056	4.70864	6.86192	5.5193	0.570809	0.461521	-0.525314	-0.634602	1	86125131	86125199	69	-
ENSSSCG00000004466	TTK	1	86076583	86125718	E030	16.2355	0.0225781	10.9203	0.0121649	0.959503	5.88729	5.02012	6.72811	5.29141	0.463376	0.15293	-0.389245	-0.699691	1	86125092	86125108	17	-
ENSSSCG00000004466	TTK	1	86076583	86125718	E009	45.4688	0.00820053	8.24262	0.0412548	1	9.4392	10.2185	8.46919	9.47781	-0.23473	-0.222674	0.319503	0.331558	1	86089288	86089439	152	-
ENSSSCG00000004469	LCA5	1	86597283	86685068	E007	2.65758	0.191471	8.05323	0.0449244	1	1.6175	1.7972	3.02335	2.70589	-0.304207	1.18227	-1.80726	-0.320778	1	86677186	86677317	132	+
ENSSSCG00000004469	LCA5	1	86597283	86685068	E011	16.3341	0.0583237	10.5383	0.0145035	0.9769	6.55342	5.83101	4.87505	5.93519	0.340423	0.0515662	0.860992	0.572135	1	86683223	86685068	1846	+
ENSSSCG00000004470	HMGN3	1	86954465	86987460	E001	2.55476	0.241009	9.49376	0.0233978	1	2.4584	3.09738	2.19678	1.11761	-0.66801	-2.94446	0.325126	-1.95133	1	86954465	86954481	17	+
ENSSSCG00000004472	IRAK1BP1	1	87290826	87329716	E003	20.3635	0.0183886	8.57023	0.0355858	1	6.90708	6.58606	6.66404	5.78542	0.138975	-0.377773	0.10462	-0.412128	1	87318300	87318365	66	-
ENSSSCG00000004473	PHIP	1	87117092	87243675	E041	65.0372	0.016584	11.1107	0.0111423	0.945505	11.7768	12.3459	10.9002	10.2086	-0.141379	-0.566826	0.230744	-0.194703	1	87237149	87237408	260	+
ENSSSCG00000004473	PHIP	1	87117092	87243675	E042	67.2906	0.016115	7.92317	0.0476266	1	12.1918	12.0622	11.2405	10.7482	0.0320336	-0.344191	0.242882	-0.133342	1	87237940	87238137	198	+
ENSSSCG00000004478	MYO6	1	89992866	90137734	E044	2.84515	0.196126	7.85212	0.0491689	1	2.92942	1.40468	3.04672	2.2188	2.12327	1.3202	-0.113549	-0.916622	1	90137700	90137734	35	-
ENSSSCG00000004478	MYO6	1	89992866	90137734	E039	46.4219	0.00994212	10.2921	0.0162394	0.987685	10.6496	9.10392	9.45021	9.64111	0.464113	0.169259	0.353949	0.0590949	1	90078953	90079022	70	-
ENSSSCG00000004478	MYO6	1	89992866	90137734	E043	2.84515	0.196126	7.85212	0.0491689	1	2.92942	1.40468	3.04672	2.2188	2.12327	1.3202	-0.113549	-0.916622	1	90137697	90137699	3	-
ENSSSCG00000004478	MYO6	1	89992866	90137734	E038	49.5899	0.0270315	7.90931	0.0479237	1	11.1048	9.54826	9.26589	10.1299	0.447983	0.174966	0.536625	0.263608	1	90072827	90072900	74	-
ENSSSCG00000004478	MYO6	1	89992866	90137734	E042	46.824	0.0244082	13.2868	0.00405578	0.800674	10.5593	8.55057	10.8577	9.26358	0.623479	0.235942	-0.0828181	-0.470355	1	90137517	90137696	180	-
ENSSSCG00000004478	MYO6	1	89992866	90137734	E040	59.0216	0.0114141	15.7441	0.00127953	0.67967	11.9429	9.75801	11.4344	10.5941	0.601033	0.243681	0.130078	-0.227275	1	90084649	90084791	143	-
ENSSSCG00000004484	COL12A1	1	90744612	90875118	E062	901.154	0.00753969	8.65366	0.0342683	1	35.5597	36.8029	35.5197	37.8281	-0.131407	0.106605	0.00427034	0.242283	1	90855810	90855863	54	+
ENSSSCG00000004484	COL12A1	1	90744612	90875118	E067	887.074	0.00642811	8.89436	0.0307289	1	35.0379	36.7284	35.7671	37.3275	-0.179506	0.062548	-0.0780033	0.164051	1	90862868	90862921	54	+
ENSSSCG00000004484	COL12A1	1	90744612	90875118	E055	641.849	0.0016701	10.7408	0.0132132	0.968437	31.1295	32.4756	31.5201	32.5714	-0.153276	0.0107625	-0.0448876	0.119151	1	90842703	90842741	39	+
ENSSSCG00000004484	COL12A1	1	90744612	90875118	E036	635.761	0.00492031	11.5087	0.0092706	0.921145	32.9828	30.9964	32.2507	31.5787	0.225416	0.0669763	0.0820844	-0.0763552	1	90811836	90811968	133	+
ENSSSCG00000004484	COL12A1	1	90744612	90875118	E037	445.334	0.00622136	10.6611	0.0137072	0.968875	28.6217	26.8883	27.8109	27.1997	0.215668	0.0394371	0.099734	-0.0764969	1	90812078	90812104	27	+
ENSSSCG00000004484	COL12A1	1	90744612	90875118	E070	987.287	0.00886692	8.20994	0.0418664	1	36.364	38.7767	37.3203	38.2818	-0.250045	-0.0506239	-0.100105	0.0993164	1	90867605	90867671	67	+
ENSSSCG00000004484	COL12A1	1	90744612	90875118	E030	661.986	0.0121715	8.37245	0.0389099	1	33.9228	31.4447	32.8986	31.7882	0.277624	0.0392504	0.113228	-0.125146	1	90805428	90805557	130	+
ENSSSCG00000004485	CD109	1	92054821	92286730	E027	96.073	0.0140252	8.37496	0.038866	1	13.5985	13.0607	14.4896	13.4077	0.121864	0.0791391	-0.192606	-0.235331	1	92163818	92163959	142	-
ENSSSCG00000004485	CD109	1	92054821	92286730	E015	169.772	0.00483904	9.18172	0.0269699	1	18.509	16.8736	18.3473	17.5946	0.288713	0.130107	0.0275608	-0.131045	1	92126539	92126757	219	-
ENSSSCG00000004486	SLC17A5	1	92286841	92342776	E002	25.6174	0.0203726	10.5605	0.0143559	0.975492	7.65234	6.82365	8.11293	6.57148	0.335292	-0.109941	-0.171414	-0.616647	1	92286908	92287051	144	+
ENSSSCG00000004487	MTO1	1	92447164	92483236	E007	35.5865	0.0112518	10.8724	0.0124363	0.962011	8.57884	7.60368	9.34276	8.63369	0.354187	0.372935	-0.251352	-0.232604	1	92459204	92459334	131	-
ENSSSCG00000004487	MTO1	1	92447164	92483236	E008	44.2419	0.0064159	10.6789	0.0135953	0.968875	10.0323	9.42537	9.98984	8.72542	0.184572	-0.227491	0.0125718	-0.399491	1	92459864	92460054	191	-
ENSSSCG00000004491	ENSSSCG00000004491	1	95255632	95320542	E018	2.86246	0.144615	10.4074	0.0154025	0.984866	2.26529	2.57126	2.04275	1.55456	-0.366129	-1.45355	0.298734	-0.788689	1	95314249	95314396	148	+
ENSSSCG00000004492	SLC14A1	1	95355016	95381489	E012	18.7285	0.0186025	10.7726	0.013021	0.968437	6.43015	5.19999	5.32131	6.55262	0.618153	0.673201	0.551118	0.606166	1	95377594	95377596	3	+
ENSSSCG00000004492	SLC14A1	1	95355016	95381489	E008	43.5108	0.0222586	20.0843	0.000163052	0.406229	8.80186	9.18524	10.2159	6.95755	-0.125644	-0.81519	-0.440105	-1.12965	1	95367950	95368142	193	+
ENSSSCG00000004492	SLC14A1	1	95355016	95381489	E011	23.8537	0.0478516	9.1701	0.0271127	1	7.17084	5.89816	6.20064	7.60306	0.570108	0.741422	0.424403	0.595718	1	95377555	95377593	39	+
ENSSSCG00000004492	SLC14A1	1	95355016	95381489	E007	27.994	0.0227921	13.4308	0.00379175	0.787463	7.48787	7.09598	7.87674	5.57437	0.157291	-0.70375	-0.148365	-1.00941	1	95365604	95365732	129	+
ENSSSCG00000004493	SIGLEC15	1	95475438	95492709	E002	71.6134	0.0039386	12.4057	0.00611497	0.870343	12.5743	11.215	11.7954	11.3882	0.342397	0.0457142	0.191714	-0.104969	1	95475447	95475484	38	+
ENSSSCG00000004493	SIGLEC15	1	95475438	95492709	E001	56.9176	0.00959419	15.1997	0.0016537	0.703481	11.6829	9.84734	10.6264	9.98709	0.508227	0.0417179	0.282467	-0.184042	1	95475438	95475446	9	+
ENSSSCG00000004499	ATP5F1A	1	95733090	95750841	E011	1758.91	0.00392305	8.42325	0.0380283	1	47.431	45.4462	46.4757	45.8813	0.186945	0.041249	0.0895964	-0.0560992	1	95748823	95748901	79	-
ENSSSCG00000004499	ATP5F1A	1	95733090	95750841	E010	2449.36	0.00342611	8.26143	0.0409067	1	52.4404	50.5111	51.7311	51.2122	0.175264	0.0639362	0.0641985	-0.0471291	1	95746976	95747145	170	-
ENSSSCG00000004505	SMAD2	1	97415716	97511357	E014	209.281	0.00336866	9.47872	0.0235588	1	19.7749	19.3971	20.8435	19.644	0.0612051	0.0401094	-0.168116	-0.189212	1	97483987	97484275	289	-
ENSSSCG00000004506	CTIF	1	98133342	98456433	E006	37.797	0.0236083	9.06079	0.0284934	1	8.9207	9.30496	9.29537	7.6757	-0.124356	-0.565951	-0.121312	-0.562908	1	98233535	98233606	72	+
ENSSSCG00000004509	LIPG	1	99081938	99110874	E008	15.2875	0.0603235	9.38424	0.0245953	1	5.24453	5.1499	6.46535	4.43771	0.0529132	-0.432065	-0.609292	-1.09427	1	99098767	99099009	243	+
ENSSSCG00000004509	LIPG	1	99081938	99110874	E006	18.0785	0.0352793	10.0351	0.0182702	1	6.35994	5.13924	5.61527	6.97931	0.620279	0.891574	0.362722	0.634017	1	99089921	99090032	112	+
ENSSSCG00000004516	MBD1	1	99900801	99917323	E016	195.238	0.00214855	9.66749	0.0216148	1	19.0702	18.6157	20.1014	19.2901	0.0760258	0.112287	-0.167118	-0.130857	1	99908820	99908948	129	-
ENSSSCG00000004516	MBD1	1	99900801	99917323	E001	86.5392	0.0183874	10.4186	0.0153235	0.984521	13.6561	13.2263	13.7443	11.7827	0.0966387	-0.347191	-0.0194904	-0.46332	1	99900801	99902037	1237	-
ENSSSCG00000004517	CXXC1	1	99934497	99940130	E009	163.001	0.00543699	8.10672	0.0438569	1	18.4985	17.519	16.9619	17.2314	0.17026	-0.0515253	0.270735	0.0489499	1	99935724	99935773	50	-
ENSSSCG00000004517	CXXC1	1	99934497	99940130	E008	137.054	0.00908595	9.17324	0.0270741	1	16.9315	16.8429	15.4303	15.4476	0.0162725	-0.266527	0.286231	0.00343178	1	99935545	99935581	37	-
ENSSSCG00000004520	ENSSSCG00000004520	1	100107935	100288936	E005	18.6953	0.0455139	9.96717	0.0188473	1	5.9363	6.75547	6.05678	5.74709	-0.376955	-0.471265	-0.0585266	-0.152837	1	100219016	100220451	1436	+
ENSSSCG00000004522	ME2	1	100419760	100476733	E015	171.599	0.00296599	8.73657	0.0330063	1	17.215	18.4574	18.2743	18.4868	-0.217757	0.00499965	-0.186466	0.0362906	1	100454332	100454446	115	+
ENSSSCG00000004524	SMAD4	1	100589850	100628029	E003	113.012	0.00468506	14.306	0.00251684	0.742858	15.7412	14.1205	15.3499	14.4664	0.331835	0.073586	0.0772468	-0.181003	1	100592211	100592240	30	+
ENSSSCG00000004529	POLI	1	103794281	103824644	E004	40.8517	0.0100304	8.37832	0.0388069	1	8.3797	9.13792	9.84266	9.26808	-0.254999	0.041723	-0.474459	-0.177737	1	103798188	103798352	165	+
ENSSSCG00000004531	C18orf54	1	103861246	103887284	E004	11.5412	0.0235694	8.2298	0.0414937	1	5.21439	5.06291	3.81587	4.89116	0.0856552	-0.100238	0.905804	0.71991	1	103862413	103862477	65	+
ENSSSCG00000004531	C18orf54	1	103861246	103887284	E005	10.0724	0.0416128	9.28042	0.0257858	1	4.50653	4.82694	3.38088	5.03585	-0.199329	0.123039	0.832625	1.15499	1	103862478	103862508	31	+
ENSSSCG00000004534	CCDC68	1	104424001	104474489	E004	2.47995	0.16969	9.40822	0.0243281	1	2.84004	2.82203	1.1859	1.82185	0.0183912	-1.26443	2.5224	1.23957	1	104436762	104436845	84	-
ENSSSCG00000004535	TCF4	1	104719151	105079919	E014	61.7681	0.0154947	8.26128	0.0409095	1	12.2113	10.7079	10.8113	10.9331	0.392173	0.0619055	0.363607	0.0333399	1	104751297	104751299	3	-
ENSSSCG00000004537	TXNL1	1	105973641	106013574	E003	6.73807	0.0911147	8.15059	0.0429998	1	2.77538	4.2118	4.35188	3.49985	-1.20734	-0.53639	-1.3022	-0.631252	1	105979579	105980203	625	-
ENSSSCG00000004537	TXNL1	1	105973641	106013574	E004	25.8351	0.0356364	9.35961	0.0248728	1	7.73778	8.20091	6.52	6.36341	-0.170542	-0.742181	0.500723	-0.070916	1	105980245	105981848	1604	-
ENSSSCG00000004538	WDR7	1	106036029	106411724	E028	45.6544	0.00866345	11.701	0.00848097	0.913257	10.0347	8.66368	10.1285	9.86682	0.433661	0.383704	-0.0275764	-0.0775335	1	106339268	106339367	100	+
ENSSSCG00000004543	MTFMT	1	106970640	107001564	E007	34.2868	0.0148586	9.45383	0.0238276	1	7.95817	7.93914	9.49857	8.14135	0.00702233	0.0738108	-0.520797	-0.454009	1	106997602	106997680	79	+
ENSSSCG00000004547	PLEKHO2	1	107186288	107218532	E015	64.3756	0.0174441	8.17174	0.0425926	1	12.5755	10.8604	11.3744	10.9753	0.438349	0.0313054	0.300578	-0.106466	1	107208826	107208837	12	-
ENSSSCG00000004549	RBPMS2	1	107259351	107296524	E006	28.5836	0.0216233	8.38787	0.0386401	1	7.65236	6.91867	8.37326	7.83541	0.294899	0.364187	-0.264176	-0.194888	1	107288102	107288253	152	+
ENSSSCG00000004551	ZNF609	1	107340542	107583273	E006	450.597	0.00301808	11.036	0.0115327	0.948321	28.2844	27.3628	28.2582	27.3713	0.114449	0.00107419	0.00321669	-0.110158	1	107349877	107352217	2341	-
ENSSSCG00000004558	CSNK1G1	1	107690065	107884045	E014	1.42356	0.297696	12.8973	0.00486411	0.825951	2.33868	2.01097	1.34535	0.0123847	0.436147	-14.6879	1.59684	-13.5272	1	107868460	107868603	144	+
ENSSSCG00000004558	CSNK1G1	1	107690065	107884045	E015	28.1405	0.048272	9.17691	0.027029	1	8.06081	6.78774	6.74005	8.49063	0.503204	0.655809	0.523794	0.676398	1	107869296	107869402	107	+
ENSSSCG00000004561	HERC1	1	108205580	108403862	E070	202.008	0.00412294	11.507	0.00927762	0.921145	18.4174	18.9839	19.7373	20.4125	-0.0953831	0.230464	-0.218628	0.107219	1	108385212	108385367	156	+
ENSSSCG00000004561	HERC1	1	108205580	108403862	E008	32.084	0.0319397	8.93821	0.0301237	1	8.45629	8.0383	8.07498	6.63034	0.148897	-0.563501	0.135536	-0.576861	1	108265526	108265550	25	+
ENSSSCG00000004561	HERC1	1	108205580	108403862	E029	37.1558	0.0260813	7.95442	0.0469631	1	8.6324	9.41035	8.15047	7.38128	-0.254323	-0.713745	0.168838	-0.290584	1	108308169	108308220	52	+
ENSSSCG00000004561	HERC1	1	108205580	108403862	E039	122.87	0.0212796	9.349	0.0249932	1	16.0851	14.9067	15.1709	14.3757	0.233328	-0.110548	0.17963	-0.164246	1	108335567	108335806	240	+
ENSSSCG00000004561	HERC1	1	108205580	108403862	E055	103.98	0.00692784	8.18589	0.0423221	1	14.0621	14.01	13.2458	15.2171	0.0112646	0.251808	0.181005	0.421548	1	108366580	108366785	206	+
ENSSSCG00000004561	HERC1	1	108205580	108403862	E060	123.936	0.0155217	9.50964	0.023229	1	15.2502	14.5211	16.2515	15.6402	0.149557	0.226977	-0.195403	-0.117983	1	108374306	108374505	200	+
ENSSSCG00000004561	HERC1	1	108205580	108403862	E069	191.428	0.00470732	7.84139	0.049406	1	17.9244	18.9167	18.9876	19.7717	-0.169218	0.139969	-0.181019	0.128168	1	108384058	108384239	182	+
ENSSSCG00000004561	HERC1	1	108205580	108403862	E009	11.1691	0.250774	9.91892	0.0192681	1	2.68631	5.58608	4.87303	5.75919	-2.12159	0.088811	-1.72471	0.485693	1	108265629	108267197	1569	+
ENSSSCG00000004561	HERC1	1	108205580	108403862	E017	45.5695	0.0213314	9.87025	0.0197019	1	10.0817	9.54542	9.50539	8.12652	0.161737	-0.473899	0.174152	-0.461484	1	108280330	108280455	126	+
ENSSSCG00000004565	CA12	1	108649271	108710651	E010	125.568	0.0114431	10.5912	0.014155	0.973906	15.6168	15.3208	15.2519	14.1594	0.0586822	-0.240424	0.0724899	-0.226617	1	108706456	108706543	88	+
ENSSSCG00000004569	LACTB	1	108909693	108924511	E007	89.7188	0.0110564	8.38047	0.0387694	1	13.6127	12.6364	14.2801	12.9122	0.224454	0.064962	-0.145152	-0.304643	1	108924096	108924511	416	-
ENSSSCG00000004570	TPM1	1	108986986	109020035	E013	6.0332	0.258993	8.84409	0.0314373	1	4.21621	3.07569	4.51677	2.34614	0.913252	-0.78275	-0.199693	-1.8957	1	108995901	108996175	275	-
ENSSSCG00000004570	TPM1	1	108986986	109020035	E026	558.47	0.014183	10.6433	0.01382	0.968875	30.3353	32.6381	29.6842	28.46	-0.263903	-0.488407	0.0768916	-0.147613	1	109014880	109015005	126	-
ENSSSCG00000004576	RORA	1	111375457	111477703	E013	35.6767	0.00879393	15.6163	0.001359	0.689071	7.49568	9.00936	9.25639	8.34023	-0.540256	-0.2271	-0.620026	-0.30687	1	111467842	111467949	108	+
ENSSSCG00000004578	ANXA2	1	111588306	111635059	E008	2.31391	0.181124	7.91132	0.0478805	1	2.40635	2.42041	2.69627	1.18479	-0.0168386	-2.06294	-0.32881	-2.37491	1	111603239	111604491	1253	+
ENSSSCG00000004586	FAM81A	1	112548265	112620769	E001	40.7267	0.0434486	11.9858	0.007432	0.898743	8.59609	9.60315	8.00734	10.1727	-0.32664	0.170534	0.208441	0.705615	1	112548265	112550860	2596	-
ENSSSCG00000004586	FAM81A	1	112548265	112620769	E004	6.37469	0.0586727	10.0696	0.0179834	1	3.84673	3.01249	4.18595	2.93245	0.707542	-0.0778872	-0.244888	-1.03032	1	112564260	112564366	107	-
ENSSSCG00000004586	FAM81A	1	112548265	112620769	E005	9.6861	0.0327483	8.51647	0.0364609	1	4.88645	3.98399	4.78163	3.96337	0.592209	-0.015038	0.0629557	-0.544291	1	112566174	112566303	130	-
ENSSSCG00000004589	RNF111	1	112961468	113059600	E013	62.8581	0.0143129	21.3657	8.83818e-05	0.305092	11.3551	10.1197	13.0417	10.9363	0.342464	0.230467	-0.415203	-0.5272	1	112981689	112981944	256	-
ENSSSCG00000004589	RNF111	1	112961468	113059600	E012	69.5178	0.00487483	8.06158	0.044756	1	11.7851	11.313	12.6171	11.9011	0.122121	0.151419	-0.204536	-0.175238	1	112976480	112976828	349	-
ENSSSCG00000004592	SLTM	1	113084008	113136599	E037	0.952436	0.229633	8.15125	0.0429871	1	1.10085	1.79067	0.0362115	1.75609	-1.40454	-0.0563151	9.85251	11.2007	1	113136595	113136599	5	+
ENSSSCG00000004592	SLTM	1	113084008	113136599	E013	1.51754	0.26885	11.2659	0.0103715	0.933916	1.23922	2.25818	2.39418	0.580539	-1.73281	-3.92121	-1.90179	-4.09019	1	113102026	113102029	4	+
ENSSSCG00000004595	ADAM10	1	113289209	113412798	E024	248.063	0.00227874	8.0092	0.045822	1	20.6965	21.6291	22.2057	21.6037	-0.141939	-0.00379394	-0.227294	-0.089149	1	113391221	113391371	151	+
ENSSSCG00000004596	LIPC	1	113433687	113583963	E001	86.7114	0.00926027	9.83402	0.020031	1	13.0751	13.8733	12.1299	13.4226	-0.179128	-0.099962	0.225568	0.304734	1	113433687	113433840	154	-
ENSSSCG00000004600	TCF12	1	114682303	115056262	E024	121.859	0.00874244	8.08987	0.0441904	1	16.2873	15.0999	15.7348	14.9531	0.232498	-0.0298542	0.106258	-0.156094	1	114881039	114881141	103	-
ENSSSCG00000004601	MNS1	1	115471922	115553524	E001	5.44462	0.060499	8.00522	0.0459039	1	3.91517	2.8769	2.59014	3.75953	0.891814	0.774315	1.19539	1.07789	1	115471922	115472057	136	+
ENSSSCG00000004601	MNS1	1	115471922	115553524	E014	5.81548	0.0740222	9.45634	0.0238004	1	3.6625	4.07035	3.62476	2.47177	-0.305853	-1.44321	0.0299975	-1.10736	1	115527294	115527810	517	+
ENSSSCG00000004602	TEX9	1	115526740	115607894	E004	5.45899	0.0901302	11.6718	0.00859619	0.913257	2.98187	3.54481	4.43749	2.532	-0.500391	-0.973216	-1.15119	-1.62401	1	115553445	115553579	135	-
ENSSSCG00000004602	TEX9	1	115526740	115607894	E005	10.2273	0.0416785	10.2345	0.0166743	0.992103	4.47509	4.37415	5.69636	3.87642	0.0661708	-0.350122	-0.700996	-1.11729	1	115575635	115575808	174	-
ENSSSCG00000004610	CCPG1	1	116449079	116492907	E003	152.408	0.00566001	8.86352	0.0311616	1	17.6038	16.6767	17.5747	16.8848	0.168085	0.0384191	0.0051629	-0.124503	1	116466531	116466599	69	+
ENSSSCG00000004612	RAB27A	1	116532974	116606474	E014	2.2747	0.140511	10.227	0.0167315	0.992103	2.9208	1.47211	1.47165	1.93484	1.97939	0.78926	1.98029	0.790164	1	116606472	116606474	3	+
ENSSSCG00000004617	FAM214A	1	119020990	119124464	E001	320.348	0.00726563	8.69446	0.0336415	1	25.1522	23.3267	23.9421	23.5471	0.250265	0.0309719	0.164308	-0.054985	1	119020990	119021978	989	+
ENSSSCG00000004620	MYO5A	1	119165942	119394725	E030	60.7864	0.00491994	9.37172	0.0247359	1	10.3595	11.2528	10.9802	11.7859	-0.246006	0.138211	-0.172915	0.211302	1	119359728	119359808	81	+
ENSSSCG00000004620	MYO5A	1	119165942	119394725	E002	52.7998	0.017328	7.86989	0.0487787	1	10.8434	11.1349	9.29855	9.97586	-0.078984	-0.326473	0.455332	0.207844	1	119250731	119250902	172	+
ENSSSCG00000004624	MAPK6	1	119725029	119771312	E012	18.5056	0.0242641	18.559	0.000337229	0.493219	7.57617	5.33242	6.05266	5.59022	1.02442	0.137302	0.655723	-0.231389	1	119758812	119758885	74	-
ENSSSCG00000004624	MAPK6	1	119725029	119771312	E011	20.8993	0.0294752	9.66431	0.0216461	1	7.38814	5.74913	7.12498	6.05129	0.731956	0.14916	0.106107	-0.476689	1	119758791	119758811	21	-
ENSSSCG00000004625	LEO1	1	119805006	119859434	E017	46.1136	0.0126635	13.2186	0.00418701	0.800674	9.12769	10.9749	9.10908	9.39494	-0.545913	-0.460761	0.00601989	0.0911727	1	119842112	119842340	229	+
ENSSSCG00000004625	LEO1	1	119805006	119859434	E006	72.0335	0.014944	8.21768	0.0417208	1	12.5276	12.693	12.0244	11.0142	-0.0394143	-0.424463	0.122998	-0.26205	1	119816010	119816075	66	+
ENSSSCG00000004630	SCG3	1	120045309	120138260	E013	1.66107	0.153537	10.0533	0.0181188	1	1.91106	2.14389	1.98202	1.11562	-0.332084	-1.88605	-0.105307	-1.65928	1	120077630	120077807	178	-
ENSSSCG00000004632	GLDN	1	120322432	120399041	E002	32.662	0.0157688	8.65334	0.0342733	1	8.13712	8.42025	6.68997	8.41055	-0.100479	-0.00338869	0.573224	0.670314	1	120329028	120329178	151	-
ENSSSCG00000004634	AP4E1	1	120880456	120946031	E025	12.2107	0.0406165	10.6453	0.0138072	0.968875	5.71456	4.03373	5.5327	4.74551	1.01132	0.471287	0.0940979	-0.445937	1	120922905	120922978	74	-
ENSSSCG00000004635	SPPL2A	1	121067454	121134888	E010	139.786	0.00524477	7.8258	0.0497526	1	16.4318	15.7548	17.3914	16.5315	0.129629	0.148328	-0.176007	-0.157308	1	121109562	121109663	102	+
ENSSSCG00000004636	TRPM7	1	121146117	121250224	E030	36.0528	0.0102859	8.72509	0.0331783	1	8.18382	8.84326	7.75768	9.27426	-0.227891	0.140282	0.156888	0.525061	1	121232943	121232977	35	+
ENSSSCG00000004636	TRPM7	1	121146117	121250224	E029	46.3399	0.00802259	7.98373	0.0463492	1	9.32221	9.88229	9.01324	10.4564	-0.172441	0.167397	0.0994126	0.439251	1	121230751	121230821	71	+
ENSSSCG00000004636	TRPM7	1	121146117	121250224	E022	48.9501	0.00716864	9.96877	0.0188335	1	10.7207	9.72303	9.52252	9.38545	0.289594	-0.104416	0.351186	-0.0428237	1	121211636	121211810	175	+
ENSSSCG00000004636	TRPM7	1	121146117	121250224	E031	39.0239	0.0100635	15.8589	0.00121207	0.672954	8.43899	9.6116	7.64374	9.48297	-0.383477	-0.0398087	0.290464	0.634132	1	121235658	121235683	26	+
ENSSSCG00000004636	TRPM7	1	121146117	121250224	E026	187.6	0.00390364	10.0627	0.0180404	1	18.3302	18.3383	19.946	18.8324	-0.00139597	0.0836113	-0.266975	-0.181968	1	121217326	121218041	716	+
ENSSSCG00000004639	USP8	1	121306032	121413223	E006	42.4152	0.0167709	9.43779	0.0240024	1	8.96809	9.90047	10.1412	8.35566	-0.292095	-0.500232	-0.363253	-0.571391	1	121307007	121307698	692	-
ENSSSCG00000004639	USP8	1	121306032	121413223	E026	41.3245	0.019855	7.89365	0.0482615	1	9.27263	8.1368	9.69901	9.59354	0.384573	0.48505	-0.132798	-0.0323209	1	121335500	121335501	2	-
ENSSSCG00000004646	ATP8B4	1	121650951	121914712	E017	60.3224	0.0305033	11.3489	0.00998123	0.929753	11.2018	9.51865	9.91667	11.742	0.483072	0.623689	0.361928	0.502545	1	121820676	121820841	166	+
ENSSSCG00000004651	GALK2	1	122369545	122542222	E006	85.6579	0.00610397	8.80067	0.032062	1	12.0115	13.5429	13.0179	13.3275	-0.361092	-0.0484655	-0.241718	0.070908	1	122426084	122426153	70	-
ENSSSCG00000004651	GALK2	1	122369545	122542222	E005	121.251	0.00459566	9.50625	0.0232649	1	14.7432	15.0306	15.1756	16.1139	-0.0589578	0.213556	-0.0883109	0.184203	1	122394544	122394745	202	-
ENSSSCG00000004652	COPS2	1	122542387	122578858	E007	238.879	0.00226812	10.0856	0.0178523	1	21.8418	20.5942	20.4341	21.1336	0.189511	0.0830227	0.214481	0.107993	1	122559770	122559895	126	+
ENSSSCG00000004653	SECISBP2L	1	122633736	122688603	E010	52.2901	0.015247	10.6454	0.0138065	0.968875	11.4143	9.8792	10.2726	9.62016	0.429178	-0.0785908	0.313492	-0.194276	1	122652352	122652467	116	+
ENSSSCG00000004657	CEP152	1	122876141	122979845	E030	22.6983	0.0357984	15.542	0.00140745	0.689071	5.90315	7.38483	7.29367	6.19908	-0.653676	-0.511172	-0.617324	-0.47482	1	122967271	122967374	104	+
ENSSSCG00000004657	CEP152	1	122876141	122979845	E013	14.5263	0.0713968	15.654	0.00133506	0.687832	6.0947	5.17735	3.26754	5.84898	0.474632	0.354772	1.80882	1.68896	1	122904447	122904647	201	+
ENSSSCG00000004658	FBN1	1	123102009	123359649	E004	136.299	0.0131967	8.06642	0.0446588	1	16.9453	15.3211	16.9654	16.3014	0.310517	0.190674	-0.00368363	-0.123527	1	123154128	123154223	96	+
ENSSSCG00000004658	FBN1	1	123102009	123359649	E056	396.603	0.00240812	8.57096	0.0355741	1	25.6326	27.4217	26.685	26.1453	-0.22972	-0.162757	-0.136444	-0.0694801	1	123336279	123336404	126	+
ENSSSCG00000004662	SLC24A5	1	123635043	123656736	E004	8.8001	0.178297	10.7786	0.0129854	0.968437	5.00456	3.912	4.39239	3.86126	0.714402	-0.0378202	0.378675	-0.373546	1	123640552	123640835	284	-
ENSSSCG00000004679	SORD	1	126655156	126701138	E007	116.675	0.00325583	11.9402	0.00759077	0.898743	15.9699	14.9223	15.2428	14.3675	0.20801	-0.11546	0.143032	-0.180439	1	126678808	126678967	160	-
ENSSSCG00000004684	SPG11	1	126902186	127003397	E016	30.1451	0.0159163	7.95525	0.0469458	1	8.38261	7.77837	8.32507	7.13785	0.219587	-0.251602	0.0202399	-0.450949	1	126931437	126931618	182	+
ENSSSCG00000004684	SPG11	1	126902186	127003397	E036	71.2799	0.00509616	9.3766	0.024681	1	11.877	11.5551	11.3312	12.8809	0.0821271	0.325686	0.140555	0.384114	1	126987863	126987997	135	+
ENSSSCG00000004684	SPG11	1	126902186	127003397	E037	70.7702	0.0172048	9.13248	0.0275804	1	11.3812	11.657	11.2547	13.2152	-0.0714915	0.376724	0.0333439	0.481559	1	126990423	126990556	134	+
ENSSSCG00000004691	EIF3J	1	126997227	127019147	E010	6.14053	0.0560221	8.86177	0.0311864	1	3.0159	3.62672	4.57828	3.04297	-0.533701	-0.507858	-1.20897	-1.18312	1	127018883	127018892	10	-
ENSSSCG00000004701	CATSPER2	1	127814376	127829109	E012	3.37745	0.108417	8.24924	0.041132	1	3.35217	2.64599	1.78546	2.54803	0.684203	-0.109045	1.82068	1.02744	1	127822139	127822238	100	+
ENSSSCG00000004704	PPIP5K1	1	127865562	127915451	E027	19.1741	0.0327506	9.21211	0.0265997	1	5.62199	6.82135	5.68692	6.8802	-0.563654	0.0250969	-0.0334183	0.555333	1	127882386	127882489	104	+
ENSSSCG00000004704	PPIP5K1	1	127865562	127915451	E029	18.6206	0.0507335	8.1087	0.0438179	1	6.00262	6.61839	5.25607	6.81669	-0.284746	0.0862005	0.386426	0.757373	1	127882697	127882811	115	+
ENSSSCG00000004708	TUBGCP4	1	128029406	128083958	E016	17.7411	0.026778	9.22457	0.0264494	1	6.80873	5.55206	6.3625	5.43786	0.594659	-0.0604487	0.197828	-0.45728	1	128069748	128069827	80	-
ENSSSCG00000004708	TUBGCP4	1	128029406	128083958	E022	31.3412	0.020493	9.24384	0.0262186	1	8.60419	6.9627	8.12304	8.43765	0.620536	0.563057	0.169109	0.111631	1	128083677	128083905	229	-
ENSSSCG00000004708	TUBGCP4	1	128029406	128083958	E023	8.82103	0.0544734	13.3501	0.00393748	0.797552	4.6766	2.99926	4.17822	5.00105	1.28663	1.48137	0.326832	0.521574	1	128083906	128083935	30	-
ENSSSCG00000004708	TUBGCP4	1	128029406	128083958	E025	6.67451	0.0892619	11.9453	0.00757282	0.898743	4.03325	2.65087	3.12129	4.65315	1.2145	1.62908	0.742094	1.15668	1	128083946	128083958	13	-
ENSSSCG00000004708	TUBGCP4	1	128029406	128083958	E024	7.27821	0.0646203	12.222	0.00666006	0.888582	4.08442	2.79729	3.50614	4.80985	1.09559	1.56978	0.442172	0.916361	1	128083936	128083945	10	-
ENSSSCG00000004709	ZSCAN29	1	128084067	128094617	E006	42.4858	0.0177163	8.49805	0.0367654	1	9.21572	8.38361	10.1177	9.5635	0.278633	0.388006	-0.276078	-0.166705	1	128085090	128085526	437	+
ENSSSCG00000004710	ADAL	1	128095940	128120765	E002	30.2698	0.0384354	9.67655	0.0215255	1	7.96109	8.8076	8.24636	6.77837	-0.296978	-0.767686	-0.103345	-0.574054	1	128097950	128098776	827	-
ENSSSCG00000004710	ADAL	1	128095940	128120765	E009	13.6705	0.0206469	9.48795	0.0234599	1	5.70048	4.83087	4.7498	5.85508	0.481102	0.558998	0.530232	0.608128	1	128114903	128114990	88	-
ENSSSCG00000004713	TGM5	1	128191630	128217656	E014	5.83994	0.103774	16.9854	0.000711631	0.566725	3.66511	2.01165	3.83466	3.45194	1.73455	1.56107	-0.130973	-0.304446	1	128216713	128217656	944	+
ENSSSCG00000004717	UBR1	1	128319311	128474302	E051	164.633	0.0117279	8.2447	0.0412162	1	16.582	18.7386	17.6318	18.1375	-0.381479	-0.102419	-0.190657	0.0884027	1	128473089	128474301	1213	+
ENSSSCG00000004718	TTBK2	1	128489744	128635511	E020	10.1818	0.088327	9.8918	0.0195086	1	4.32615	3.84404	4.4237	5.83288	0.342432	1.21053	-0.0646643	0.803435	1	128616451	128616505	55	+
ENSSSCG00000004718	TTBK2	1	128489744	128635511	E025	62.4773	0.00821047	10.5185	0.0146358	0.9769	11.9714	11.2667	10.9193	10.3673	0.181276	-0.247451	0.274574	-0.154153	1	128629154	128630427	1274	+
ENSSSCG00000004719	CDAN1	1	128641430	128655554	E011	25.9209	0.0268263	8.36452	0.0390492	1	7.86234	6.25015	7.19282	7.64913	0.670822	0.590235	0.260648	0.180061	1	128645516	128645591	76	+
ENSSSCG00000004719	CDAN1	1	128641430	128655554	E019	38.5496	0.0185407	8.72924	0.0331161	1	8.55393	9.83493	8.07385	8.38109	-0.411629	-0.471645	0.169707	0.109691	1	128650327	128650460	134	+
ENSSSCG00000004725	ZNF106	1	128893971	128957305	E002	38.0066	0.0179195	8.48618	0.0369631	1	9.01943	9.47331	7.69686	8.9704	-0.144864	-0.160928	0.465961	0.449898	1	128893981	128894128	148	+
ENSSSCG00000004728	CAPN3	1	128960118	129013546	E038	42.2279	0.00887774	8.26079	0.0409186	1	9.43093	9.16256	7.99026	9.02651	0.0852005	-0.0441073	0.487882	0.358574	1	129012893	129013503	611	-
ENSSSCG00000004729	GANC	1	129021115	129098269	E003	19.5628	0.0841326	11.867	0.00785283	0.906683	6.18253	6.6951	6.25794	4.0408	-0.232334	-1.46782	-0.0353371	-1.27082	1	129025898	129026010	113	-
ENSSSCG00000004729	GANC	1	129021115	129098269	E015	10.8005	0.032443	10.59	0.0141625	0.973906	5.02313	4.69568	4.14278	3.50204	0.195721	-0.85002	0.55906	-0.486682	1	129062737	129062890	154	-
ENSSSCG00000004729	GANC	1	129021115	129098269	E016	10.8544	0.0324504	8.5366	0.0361308	1	5.1404	4.3845	4.51124	3.57436	0.461688	-0.591918	0.379031	-0.674575	1	129063120	129063300	181	-
ENSSSCG00000004729	GANC	1	129021115	129098269	E022	24.6028	0.0359322	17.9399	0.000452585	0.51408	6.16112	5.96339	7.85789	8.75036	0.0950358	1.12207	-0.710978	0.316054	1	129089774	129090097	324	-
ENSSSCG00000004736	SPTBN5	1	129462568	129511568	E037	1.82244	0.253893	8.13659	0.0432716	1	2.28828	0.89184	2.60076	1.23922	2.72051	0.949435	-0.369917	-2.141	1	129489066	129489211	146	+
ENSSSCG00000004737	PLA2G4B	1	129514346	129524313	E013	8.98074	0.0635756	8.37589	0.0388496	1	4.83307	3.57413	3.71592	4.7142	0.874745	0.802459	0.762093	0.689807	1	129520821	129520951	131	-
ENSSSCG00000004737	PLA2G4B	1	129514346	129524313	E002	9.07973	0.0667968	8.99592	0.0293452	1	4.4204	5.33354	3.64418	3.71619	-0.54524	-1.04813	0.559561	0.0566663	1	129515158	129515344	187	-
ENSSSCG00000004738	MAPKBP1	1	129533539	129588095	E030	67.5735	0.0197696	7.89843	0.0481582	1	12.6201	12.0088	11.4702	10.8971	0.148988	-0.289979	0.286191	-0.152777	1	129548331	129548513	183	-
ENSSSCG00000004739	MGA	1	129594795	129697408	E024	71.7432	0.0153506	9.131	0.0275989	1	12.6298	11.4765	12.4395	11.4601	0.286863	-0.0042791	0.0456144	-0.245527	1	129687076	129688206	1131	-
ENSSSCG00000004739	MGA	1	129594795	129697408	E002	40.3761	0.0193497	8.97322	0.0296491	1	9.86853	8.42959	8.58417	9.46985	0.464777	0.342854	0.411343	0.28942	1	129597881	129598057	177	-
ENSSSCG00000004739	MGA	1	129594795	129697408	E001	221.141	0.0144846	12.5497	0.00571891	0.855431	19.4496	21.255	19.3864	21.5468	-0.283651	0.0440175	0.0103174	0.337986	1	129594795	129596266	1472	-
ENSSSCG00000004744	TYRO3	1	129811544	129829014	E001	532.227	0.00632745	10.3906	0.0155219	0.985527	28.902	31.029	29.0456	29.1192	-0.251505	-0.225282	-0.017348	0.00887464	1	129811544	129813027	1484	-
ENSSSCG00000004753	INO80	1	130201718	130342838	E026	29.9719	0.0337981	9.31646	0.0253662	1	8.71606	8.14833	6.64808	7.49623	0.197993	-0.244571	0.793599	0.351034	1	130294649	130294789	141	+
ENSSSCG00000004753	INO80	1	130201718	130342838	E007	31.6119	0.0284529	9.78576	0.0204778	1	7.24713	8.69993	8.75222	7.29315	-0.536023	-0.517502	-0.553661	-0.535141	1	130240500	130240620	121	+
ENSSSCG00000004753	INO80	1	130201718	130342838	E008	50.9773	0.0151387	12.0678	0.00715447	0.898743	9.0723	10.8858	10.7313	9.7986	-0.539584	-0.312151	-0.497077	-0.269644	1	130241848	130242062	215	+
ENSSSCG00000004762	DNAJC17	1	130516779	130559234	E019	99.8871	0.00600279	9.3606	0.0248615	1	13.7854	14.4844	13.0896	14.5738	-0.150202	0.0187383	0.156532	0.325472	1	130559038	130559227	190	+
ENSSSCG00000004766	RAD51	1	130586665	130640136	E007	48.2112	0.0212493	7.81827	0.0499207	1	9.85978	9.20317	9.42891	10.7697	0.203619	0.465472	0.132094	0.393947	1	130606228	130606345	118	-
ENSSSCG00000004772	BAHD1	1	130849842	130875974	E005	80.6761	0.00742067	9.9634	0.0188798	1	12.0268	12.7997	13.7067	12.5395	-0.186994	-0.0617538	-0.393666	-0.268426	1	130852630	130852730	101	-
ENSSSCG00000004776	DISP2	1	130937400	130952046	E001	24.7961	0.579005	8.50463	0.0366563	1	6.3992	6.30742	9.92542	6.48689	0.0421269	0.0818287	-1.28843	-1.24872	1	130937400	130941667	4268	-
ENSSSCG00000004779	PLCB2	1	131005408	131028689	E003	39.2729	0.019669	12.9954	0.00464647	0.820318	8.83632	8.38588	10.3854	8.19139	0.153925	-0.0689347	-0.47742	-0.700281	1	131011883	131011951	69	+
ENSSSCG00000004782	BUB1B	1	131092958	131143794	E002	69.5228	0.0182696	8.10115	0.0439669	1	11.2944	12.2422	10.5702	12.566	-0.240977	0.0783839	0.197241	0.516602	1	131094946	131095052	107	-
ENSSSCG00000004789	THBS1	1	131728784	131746115	E019	533.924	0.00459128	14.7406	0.00205227	0.712026	30.6803	28.7041	30.0066	29.1048	0.235059	0.0484939	0.0789971	-0.107568	1	131743601	131743676	76	-
ENSSSCG00000004789	THBS1	1	131728784	131746115	E018	777.914	0.00254492	14.4389	0.00236472	0.729319	35.2358	34.0673	34.5258	33.4149	0.126493	-0.0717012	0.0765671	-0.121627	1	131743112	131743311	200	-
ENSSSCG00000004789	THBS1	1	131728784	131746115	E017	789.564	0.00204713	11.3063	0.0101798	0.929753	35.0673	34.1979	34.634	34.0913	0.0941432	-0.0116379	0.0467595	-0.0590216	1	131742879	131743001	123	-
ENSSSCG00000004791	RASGRP1	1	132702541	132786532	E004	11.9324	0.0660517	9.80819	0.020269	1	5.13113	3.61233	5.4263	5.5139	1.01777	1.22692	-0.162578	0.0465714	1	132742911	132743016	106	+
ENSSSCG00000004791	RASGRP1	1	132702541	132786532	E022	4.08368	0.176879	9.67951	0.0214964	1	3.05299	3.53609	3.03363	1.6766	-0.425082	-2.15693	0.0183991	-1.71345	1	132785254	132785291	38	+
ENSSSCG00000004792	FAM98B	1	132789275	132819489	E010	90.84	0.00462231	9.74516	0.0208613	1	14.0819	12.6032	13.3539	13.5435	0.335063	0.216941	0.160738	0.0426167	1	132819143	132819489	347	-
ENSSSCG00000004821	ASB7	1	139191572	139240185	E009	1.76626	0.371896	12.0921	0.00707435	0.898743	1.42299	2.53027	0.0248116	2.26618	-1.66241	-0.318537	11.6843	13.0282	1	139240167	139240185	19	+
ENSSSCG00000004822	ALDH1A3	1	139451049	139491511	E011	61.4553	0.0104269	8.15943	0.0428292	1	11.74	10.3148	11.3493	11.0049	0.385386	0.192445	0.101084	-0.0918574	1	139470317	139470430	114	+
ENSSSCG00000004823	LRRK1	1	139494121	139624604	E018	35.1018	0.0259666	10.6161	0.0139936	0.972298	9.19393	8.20763	7.16375	9.16031	0.333975	0.323168	0.7326	0.721793	1	139590290	139590410	121	+
ENSSSCG00000004823	LRRK1	1	139494121	139624604	E026	47.2666	0.00823367	14.9176	0.0018884	0.710137	10.7303	10.046	9.4972	9.00623	0.195568	-0.322792	0.361741	-0.15662	1	139608555	139608752	198	+
ENSSSCG00000004823	LRRK1	1	139494121	139624604	E023	54.0913	0.00877156	9.78533	0.0204819	1	9.98512	10.1334	11.6205	10.3466	-0.0436791	0.0617379	-0.451085	-0.345668	1	139599461	139599600	140	+
ENSSSCG00000004829	CACHD1	6	147775073	148305330	E020	4.3036	0.0938791	9.52213	0.023097	1	2.57174	3.17136	3.99454	2.29258	-0.60603	-0.9381	-1.27414	-1.60621	6	147818303	147818452	150	-
ENSSSCG00000004829	CACHD1	6	147775073	148305330	E027	7.5007	0.0618666	9.42312	0.0241635	1	4.16288	4.33511	4.33027	2.99473	-0.117533	-1.07105	-0.114292	-1.0678	6	147887915	147888063	149	-
ENSSSCG00000004830	ATP10A	1	141570493	141667338	E027	95.8914	0.00687742	10.3008	0.016175	0.987685	14.7609	13.3833	13.4946	12.849	0.297381	-0.122881	0.272351	-0.147911	1	141650091	141650418	328	+
ENSSSCG00000004830	ATP10A	1	141570493	141667338	E021	137.303	0.00490704	8.14166	0.043173	1	16.1167	17.0475	16.2662	14.8924	-0.173641	-0.415961	-0.0284701	-0.27079	1	141636665	141637119	455	+
ENSSSCG00000004832	UBE3A	1	141887227	141995003	E015	168.243	0.00932203	10.3061	0.0161358	0.987685	18.2308	18.3177	16.4357	18.3674	-0.0149123	0.00851666	0.322529	0.345958	1	141974996	141975160	165	+
ENSSSCG00000004832	UBE3A	1	141887227	141995003	E025	1.69829	0.254487	10.1044	0.017699	0.99904	1.46005	1.9179	2.85117	0.987431	-0.787602	-1.91659	-1.93335	-3.06234	1	141994838	141995003	166	+
ENSSSCG00000004844	MTMR10	1	143867839	143917878	E021	446.093	0.01234	11.841	0.00794809	0.908484	26.3486	29.1776	26.5615	28.0675	-0.352063	-0.135249	-0.0273774	0.189436	1	143916318	143917878	1561	+
ENSSSCG00000004845	FAN1	1	143913551	143961646	E013	74.202	0.0118385	9.18444	0.0269365	1	12.6026	11.4855	11.7746	13.1157	0.278023	0.398167	0.203751	0.323895	1	143953852	143954053	202	-
ENSSSCG00000004845	FAN1	1	143913551	143961646	E004	49.7739	0.0134796	8.56093	0.0357358	1	9.34116	10.5649	9.48584	10.8017	-0.364483	0.0658908	-0.0453858	0.384988	1	143931376	143931504	129	-
ENSSSCG00000004847	MPHOSPH10	1	143972596	143994041	E004	100.058	0.00355954	9.6369	0.0219187	1	13.539	14.3331	13.4595	14.5402	-0.172839	0.0436649	0.0178096	0.234313	1	143977484	143977594	111	-
ENSSSCG00000004847	MPHOSPH10	1	143972596	143994041	E002	132.705	0.00756476	8.61214	0.034918	1	15.0453	16.3582	16.8782	15.9503	-0.256972	-0.0778354	-0.353794	-0.174657	1	143973246	143973476	231	-
ENSSSCG00000004854	TJP1	1	144930370	145195836	E007	67.3901	0.0101825	9.20531	0.0266822	1	11.568	13.0523	11.1359	11.1349	-0.362201	-0.476033	0.113583	-0.000248056	1	144935175	144935195	21	-
ENSSSCG00000004854	TJP1	1	144930370	145195836	E037	6.98355	0.0598156	8.02339	0.0455308	1	4.04775	3.03708	4.66479	3.52534	0.831603	0.431375	-0.411441	-0.811669	1	145059641	145059647	7	-
ENSSSCG00000004854	TJP1	1	144930370	145195836	E008	124.622	0.00325096	8.25414	0.0410413	1	15.6937	16.541	14.8751	15.5885	-0.162042	-0.182696	0.164032	0.143378	1	144935196	144935279	84	-
ENSSSCG00000004856	NFATC1	1	145911046	146008139	E034	178.399	0.00600149	9.05988	0.0285053	1	19.3966	18.1077	18.5193	17.7372	0.216578	-0.0646399	0.146049	-0.135168	1	146008007	146008139	133	-
ENSSSCG00000004856	NFATC1	1	145911046	146008139	E031	2.76824	0.343493	8.03797	0.0452335	1	3.73573	2.16058	1.91647	1.88562	1.58349	-0.393187	1.92982	-0.0468652	1	146003287	146003310	24	-
ENSSSCG00000004856	NFATC1	1	145911046	146008139	E002	78.3358	0.0310082	10.3854	0.0155587	0.985527	12.5454	14.1242	11.2733	11.9259	-0.357975	-0.509855	0.32002	0.16814	1	145912268	145913117	850	-
ENSSSCG00000004856	NFATC1	1	145911046	146008139	E029	77.4802	0.119565	8.64724	0.034368	1	15.7306	11.5984	10.7971	12.0135	0.92208	0.105177	1.13547	0.318569	1	146002702	146003039	338	-
ENSSSCG00000004856	NFATC1	1	145911046	146008139	E006	76.4537	0.0406637	12.3595	0.00624796	0.877041	14.1129	12.7039	12.3935	10.5282	0.317805	-0.561235	0.392145	-0.486895	1	145924608	145925633	1026	-
ENSSSCG00000004856	NFATC1	1	145911046	146008139	E030	38.3333	0.122221	10.2022	0.0169232	0.992103	11.5644	8.29055	7.89592	8.0099	0.985039	-0.101112	1.12819	0.0420436	1	146003040	146003286	247	-
ENSSSCG00000004856	NFATC1	1	145911046	146008139	E004	524.939	0.0324494	8.35679	0.0391856	1	31.0191	30.3636	29.1992	27.6762	0.0763042	-0.324574	0.214504	-0.186374	1	145913119	145914837	1719	-
ENSSSCG00000004856	NFATC1	1	145911046	146008139	E009	25.7331	0.0364662	9.15505	0.0272989	1	7.67837	8.1605	6.98765	6.40177	-0.178626	-0.710149	0.275853	-0.255669	1	145939959	145940069	111	-
ENSSSCG00000004856	NFATC1	1	145911046	146008139	E020	1436.55	0.00258219	11.1408	0.0109881	0.944648	43.4863	42.1388	43.3277	43.1242	0.131212	0.0961278	0.0153517	-0.0197321	1	145992492	145993348	857	-
ENSSSCG00000004856	NFATC1	1	145911046	146008139	E010	174.648	0.0298256	12.5039	0.00584201	0.860256	19.5278	18.9384	18.25	16.4761	0.0969373	-0.434715	0.213395	-0.318257	1	145940070	145940446	377	-
ENSSSCG00000004857	ATP9B	1	146022978	146221769	E017	42.9842	0.0244992	11.1114	0.0111387	0.945505	9.7216	8.71839	8.34501	10.3636	0.321314	0.51075	0.450038	0.639474	1	146049941	146050069	129	-
ENSSSCG00000004857	ATP9B	1	146022978	146221769	E036	2.01528	0.349234	8.64898	0.034341	1	2.17038	2.26559	2.53243	0.800869	-0.124034	-3.00221	-0.445793	-3.32397	1	146221712	146221769	58	-
ENSSSCG00000004859	ZNF516	1	147984481	148087719	E001	4.39389	0.112463	11.3051	0.0101853	0.929753	3.14848	1.65995	3.51433	3.34446	1.84977	2.02449	-0.318122	-0.143401	1	147984481	147984590	110	+
ENSSSCG00000004875	CYB5A	1	149737571	149773219	E011	423.162	0.00230843	8.34492	0.039396	1	26.9614	26.4257	27.2763	27.4331	0.0684661	0.12797	-0.0398051	0.0196988	1	149771897	149771963	67	+
ENSSSCG00000004884	TMX3	1	153988050	154031120	E007	41.1369	0.0123265	7.95157	0.0470232	1	8.97979	8.65767	10.2015	9.05289	0.107571	0.131468	-0.376993	-0.353096	1	153995164	153995203	40	+
ENSSSCG00000004893	VPS4B	1	158233070	158270679	E004	194.594	0.00277192	9.4186	0.0242133	1	19.2606	19.0937	20.0781	18.5608	0.0275082	-0.0892277	-0.132004	-0.24874	1	158251230	158251386	157	+
ENSSSCG00000004896	PHLPP1	1	158642818	158862106	E012	39.2211	0.0307223	9.54262	0.0228823	1	9.74838	8.01703	9.80905	8.52151	0.575911	0.179262	-0.0183553	-0.415004	1	158682929	158683129	201	-
ENSSSCG00000004899	RELCH	1	159207616	159317675	E031	25.5387	0.0210854	8.49182	0.0368691	1	7.99061	7.13496	6.29697	7.45243	0.33174	0.127382	0.696529	0.492171	1	159289328	159289441	114	-
ENSSSCG00000004899	RELCH	1	159207616	159317675	E010	43.8498	0.0157679	9.77245	0.0206028	1	8.41113	10.3916	9.49445	9.53796	-0.624282	-0.253811	-0.356961	0.0135096	1	159227302	159227365	64	-
ENSSSCG00000004899	RELCH	1	159207616	159317675	E030	42.8767	0.0119462	12.2417	0.00659946	0.884499	10.4105	9.19465	8.99966	8.76711	0.367432	-0.140313	0.430632	-0.0771132	1	159280579	159280782	204	-
ENSSSCG00000004899	RELCH	1	159207616	159317675	E006	1.46768	0.24165	9.49868	0.0233454	1	1.33336	1.99035	2.49641	0.967353	-1.15674	-2.08297	-1.81128	-2.73751	1	159216814	159217322	509	-
ENSSSCG00000004899	RELCH	1	159207616	159317675	E035	114.233	0.011254	10.0778	0.017916	1	14.7953	13.9891	16.1413	15.1204	0.170471	0.236853	-0.266967	-0.200586	1	159316889	159317624	736	-
ENSSSCG00000004901	PIGN	1	159317734	159417327	E004	17.7529	0.0439031	8.76311	0.032612	1	5.18755	6.92179	6.01241	5.96755	-0.840205	-0.432709	-0.429309	-0.0218135	1	159328598	159328719	122	+
ENSSSCG00000004901	PIGN	1	159317734	159417327	E005	16.6922	0.0448682	7.91413	0.0478202	1	5.4632	6.83924	5.12705	5.86445	-0.654647	-0.448411	0.184592	0.390828	1	159331177	159331275	99	+
ENSSSCG00000004907	CCBE1	1	161321273	161556537	E013	9.74839	0.036668	11.536	0.0091541	0.921047	4.46646	3.42615	5.39386	4.41067	0.768228	0.731772	-0.547865	-0.584321	1	161549682	161549704	23	+
ENSSSCG00000004907	CCBE1	1	161321273	161556537	E012	9.13074	0.0298926	10.8985	0.0122875	0.96017	4.42778	3.23042	5.07809	4.3326	0.913224	0.85021	-0.397773	-0.460787	1	161549669	161549681	13	+
ENSSSCG00000004908	LMAN1	1	161607143	161631651	E004	279.129	0.00403469	8.71455	0.033337	1	22.5117	22.0594	23.2251	22.6812	0.066081	0.090579	-0.102176	-0.0776777	1	161612207	161612268	62	+
ENSSSCG00000004908	LMAN1	1	161607143	161631651	E001	327.23	0.00570254	10.9874	0.0117939	0.951257	24.9957	23.5636	24.65	23.864	0.196051	0.0418428	0.0465485	-0.10766	1	161607143	161607393	251	+
ENSSSCG00000004908	LMAN1	1	161607143	161631651	E002	401.254	0.00525771	7.84451	0.049337	1	26.539	25.8657	27.0133	26.462	0.0871745	0.0772886	-0.0604839	-0.0703699	1	161611162	161611316	155	+
ENSSSCG00000004908	LMAN1	1	161607143	161631651	E014	1878.81	0.0103997	9.19698	0.0267833	1	46.8804	48.9655	45.4419	47.9337	-0.194102	-0.0956685	0.135801	0.234234	1	161629022	161631651	2630	+
ENSSSCG00000004917	MALT1	1	162076955	162144880	E025	3.09867	0.178122	13.4116	0.00382591	0.790375	3.11529	3.3733	2.06885	1.41733	-0.230226	-2.50557	1.18316	-1.09218	1	162144855	162144880	26	-
ENSSSCG00000004917	MALT1	1	162076955	162144880	E010	15.7238	0.0412359	8.93264	0.0302	1	5.23857	4.78688	6.61224	5.91505	0.261906	0.615227	-0.678153	-0.324832	1	162091504	162091578	75	-
ENSSSCG00000004917	MALT1	1	162076955	162144880	E024	4.85883	0.103422	12.622	0.00552951	0.851497	3.86555	3.96714	2.70929	2.20284	-0.075159	-1.70164	1.02842	-0.598057	1	162144815	162144854	40	-
ENSSSCG00000004919	NEDD4L	1	162364057	162513718	E015	28.7908	0.0126531	8.38377	0.0387118	1	7.26676	7.51085	7.14527	8.49177	-0.0967022	0.360166	0.0493159	0.506184	1	162413244	162413298	55	-
ENSSSCG00000004919	NEDD4L	1	162364057	162513718	E031	22.8903	0.0446153	8.63098	0.0346217	1	7.91241	5.94551	6.6944	6.8271	0.835037	0.403244	0.489112	0.0573191	1	162451131	162451181	51	-
ENSSSCG00000004919	NEDD4L	1	162364057	162513718	E009	23.6922	0.0247101	8.01528	0.0456971	1	6.91375	6.08657	6.92746	7.7189	0.371786	0.694134	-0.00578725	0.316561	1	162391006	162391076	71	-
ENSSSCG00000004919	NEDD4L	1	162364057	162513718	E028	22.9604	0.0351668	9.98507	0.0186935	1	7.85081	6.11323	7.28833	6.37828	0.731077	0.123732	0.217756	-0.389589	1	162441350	162441411	62	-
ENSSSCG00000004927	CLPX	1	163173891	163222031	E017	235.24	0.00838735	9.50771	0.0232495	1	21.2001	21.2777	21.8202	19.6203	-0.0117763	-0.259387	-0.0931512	-0.340762	1	163221741	163222018	278	-
ENSSSCG00000004927	CLPX	1	163173891	163222031	E015	189.401	0.00385161	9.02863	0.0289126	1	19.6117	18.1333	19.2478	18.9223	0.247109	0.133883	0.0593569	-0.0538691	1	163211217	163211334	118	-
ENSSSCG00000004934	DPP8	1	163446899	163517413	E002	39.7553	0.0177828	12.9216	0.00480923	0.825801	9.10828	9.3573	7.68863	9.84009	-0.07958	0.148689	0.497996	0.726264	1	163454718	163454829	112	-
ENSSSCG00000004934	DPP8	1	163446899	163517413	E019	48.9946	0.019382	14.0296	0.00286516	0.756977	10.2251	9.91829	11.1342	8.71217	0.0902653	-0.382681	-0.25315	-0.726096	1	163515374	163515510	137	-
ENSSSCG00000004938	DENND4A	1	163660244	163790334	E016	168.047	0.00365258	10.7422	0.0132048	0.968437	17.8261	16.6325	16.9651	17.0524	0.215464	0.0772705	0.154124	0.0159301	1	163693167	163693283	117	-
ENSSSCG00000004938	DENND4A	1	163660244	163790334	E024	165.665	0.00562791	12.1259	0.00696406	0.89805	17.4997	16.8408	17.4602	15.7934	0.119271	-0.198182	0.00704561	-0.310408	1	163711711	163711856	146	-
ENSSSCG00000004939	MEGF11	1	163894312	164275442	E015	3.26859	0.198976	7.89409	0.048252	1	1.79309	2.26465	2.89406	1.11717	-0.674424	-2.04037	-1.38327	-2.74922	1	163915769	163915897	129	-
ENSSSCG00000004946	ZWILCH	1	164481964	164527223	E018	51.4565	0.011623	20.3036	0.000146844	0.389199	9.61025	10.859	8.66353	11.1373	-0.362207	0.0753576	0.30583	0.743394	1	164522303	164522415	113	+
ENSSSCG00000004946	ZWILCH	1	164481964	164527223	E009	39.6845	0.0109221	9.63661	0.0219216	1	9.67933	9.09241	8.29678	8.50099	0.184689	-0.198027	0.454185	0.0714694	1	164505644	164505715	72	+
ENSSSCG00000004951	AAGAB	1	165127994	165192924	E013	47.6729	0.0159151	8.72108	0.0332387	1	10.1916	9.40765	10.6706	9.19797	0.236796	-0.0665249	-0.136331	-0.439653	1	165192815	165192923	109	-
ENSSSCG00000004952	SMAD3	1	164998103	165124449	E011	127.42	0.00793085	9.91818	0.0192746	1	16.2078	15.0139	15.5368	16.1965	0.234866	0.232715	0.130032	0.127881	1	165114515	165114652	138	+
ENSSSCG00000004952	SMAD3	1	164998103	165124449	E001	15.8203	0.072185	8.85151	0.0313317	1	6.27356	6.48987	5.05365	4.83594	-0.0988647	-0.855945	0.629201	-0.12788	1	164998103	164998120	18	+
ENSSSCG00000004955	MAP2K5	1	165458258	165740297	E025	1.11359	0.453822	7.98454	0.0463324	1	0.02567	1.99232	0.93152	1.81266	-12.558	-0.272941	-10.3632	1.92183	1	165670090	165670119	30	+
ENSSSCG00000004955	MAP2K5	1	165458258	165740297	E016	42.4035	0.0175099	13.6604	0.00340578	0.764246	9.66223	8.56301	8.36741	10.4101	0.356112	0.576952	0.424046	0.644886	1	165562758	165562826	69	+
ENSSSCG00000004962	CORO2B	1	166465953	166608363	E012	21.9821	0.0298408	14.2075	0.00263591	0.752248	7.13245	6.17055	5.37602	7.5971	0.422885	0.607596	0.824111	1.00882	1	166592994	166593143	150	+
ENSSSCG00000004962	CORO2B	1	166465953	166608363	E001	13.5537	0.0633702	10.8895	0.0123386	0.961408	5.60131	4.52128	6.27809	4.28236	0.622246	-0.157455	-0.332196	-1.1119	1	166465953	166466245	293	+
ENSSSCG00000004962	CORO2B	1	166465953	166608363	E021	3.03375	0.397319	12.0194	0.00731684	0.898743	3.49306	1.53828	2.38121	0.93911	2.37011	-1.42447	1.10809	-2.68649	1	166601584	166603132	1549	+
ENSSSCG00000004969	KIF23	1	167239997	167281245	E012	10.1417	0.0885309	8.22766	0.0415337	1	4.10388	3.51678	5.39173	5.38663	0.447176	1.23662	-0.792192	-0.0027521	1	167262942	167262983	42	+
ENSSSCG00000004969	KIF23	1	167239997	167281245	E034	1.21722	0.269945	13.2622	0.00410264	0.800674	0.981072	0.582463	1.86326	2.58361	1.50462	4.30072	-1.85176	0.944338	1	167281243	167281245	3	+
ENSSSCG00000004971	TLE3	1	167808510	167855911	E008	107.548	0.0073147	8.73885	0.0329722	1	14.1717	14.894	15.3421	13.7529	-0.151369	-0.242367	-0.24204	-0.333037	1	167815968	167816044	77	-
ENSSSCG00000004971	TLE3	1	167808510	167855911	E006	181.424	0.0015564	8.2335	0.0414247	1	19.0182	18.8969	17.8038	18.3659	0.0201837	-0.0896747	0.207196	0.0973378	1	167814277	167814524	248	-
ENSSSCG00000004971	TLE3	1	167808510	167855911	E007	187.309	0.00204279	10.3463	0.0158405	0.987438	18.9477	19.3888	18.9977	17.8671	-0.0727599	-0.257152	-0.00831271	-0.192704	1	167814894	167815143	250	-
ENSSSCG00000004973	UACA	1	168350557	168453344	E008	126.788	0.00446734	8.96546	0.0297536	1	14.9497	16.4051	15.3103	16.1618	-0.285301	-0.0461036	-0.0728923	0.166305	1	168358642	168358707	66	-
ENSSSCG00000004973	UACA	1	168350557	168453344	E027	96.0091	0.0189355	8.27505	0.0406564	1	14.1447	12.8908	15.1066	13.164	0.28069	0.0632085	-0.20048	-0.417962	1	168398585	168398718	134	-
ENSSSCG00000004973	UACA	1	168350557	168453344	E033	2.55764	0.346904	14.7919	0.00200344	0.710137	1.16689	3.71696	2.02348	1.47196	-3.34767	-2.67723	-1.58939	-0.918941	1	168452912	168453344	433	-
ENSSSCG00000004973	UACA	1	168350557	168453344	E001	2.69875	0.201782	8.64691	0.0343731	1	2.38898	1.78142	1.50675	3.24707	0.847711	1.73504	1.33124	2.21857	1	168350557	168351049	493	-
ENSSSCG00000004976	LRRC49	1	168544421	168700891	E012	2.21067	0.148051	18.767	0.000305456	0.478627	2.97717	1.60438	0.03092	2.10822	1.78625	0.788732	13.1819	12.1844	1	168658526	168658609	84	+
ENSSSCG00000004979	MYO9A	1	169374311	169596412	E001	113.276	0.00762322	8.33924	0.039497	1	14.1837	15.8196	14.8288	15.2209	-0.333528	-0.118356	-0.135413	0.0797597	1	169374311	169374777	467	-
ENSSSCG00000004979	MYO9A	1	169374311	169596412	E042	20.2701	0.0245344	18.6146	0.00032843	0.493219	6.42205	5.42186	8.0017	6.09993	0.493017	0.342996	-0.643241	-0.793262	1	169554691	169554753	63	-
ENSSSCG00000004979	MYO9A	1	169374311	169596412	E041	26.6766	0.0123994	25.4199	1.26139e-05	0.233698	7.52642	6.37312	8.9686	6.77154	0.486047	0.176971	-0.514913	-0.823989	1	169551755	169551854	100	-
ENSSSCG00000004980	THSD4	1	168751582	169323977	E019	164.285	0.00936821	9.10826	0.0278856	1	18.0951	17.433	17.0114	18.2745	0.116415	0.147332	0.192529	0.223445	1	169322049	169323972	1924	+
ENSSSCG00000004983	ENSSSCG00000004983	1	169777596	169870892	E028	67.7007	0.00919978	8.97771	0.0295887	1	11.4097	12.5313	10.6969	11.4815	-0.280729	-0.26202	0.192149	0.210858	1	169836779	169836814	36	+
ENSSSCG00000004983	ENSSSCG00000004983	1	169777596	169870892	E028	67.7007	0.00919978	8.97771	0.0295887	1	11.4097	12.5313	10.6969	11.4815	-0.280729	-0.26202	0.192149	0.210858	1	169836779	169836814	36	+
ENSSSCG00000004983	ENSSSCG00000004983	1	169777596	169870892	E028	67.7007	0.00919978	8.97771	0.0295887	1	11.4097	12.5313	10.6969	11.4815	-0.280729	-0.26202	0.192149	0.210858	1	169836779	169836814	36	+
ENSSSCG00000004983	ENSSSCG00000004983	1	169777596	169870892	E028	67.7007	0.00919978	8.97771	0.0295887	1	11.4097	12.5313	10.6969	11.4815	-0.280729	-0.26202	0.192149	0.210858	1	169836779	169836814	36	+
ENSSSCG00000004983	ENSSSCG00000004983	1	169777596	169870892	E028	67.7007	0.00919978	8.97771	0.0295887	1	11.4097	12.5313	10.6969	11.4815	-0.280729	-0.26202	0.192149	0.210858	1	169836779	169836814	36	+
ENSSSCG00000004983	ENSSSCG00000004983	1	169777596	169870892	E028	67.7007	0.00919978	8.97771	0.0295887	1	11.4097	12.5313	10.6969	11.4815	-0.280729	-0.26202	0.192149	0.210858	1	169836779	169836814	36	+
ENSSSCG00000004983	ENSSSCG00000004983	1	169777596	169870892	E028	67.7007	0.00919978	8.97771	0.0295887	1	11.4097	12.5313	10.6969	11.4815	-0.280729	-0.26202	0.192149	0.210858	1	169836779	169836814	36	+
ENSSSCG00000004983	ENSSSCG00000004983	1	169777596	169870892	E014	87.3634	0.00395186	10.1564	0.0172823	0.996467	13.9639	12.9734	12.7161	12.718	0.22241	-0.0598546	0.282726	0.00046186	1	169813183	169813254	72	+
ENSSSCG00000004983	ENSSSCG00000004983	1	169777596	169870892	E014	87.3634	0.00395186	10.1564	0.0172823	0.996467	13.9639	12.9734	12.7161	12.718	0.22241	-0.0598546	0.282726	0.00046186	1	169813183	169813254	72	+
ENSSSCG00000004983	ENSSSCG00000004983	1	169777596	169870892	E014	87.3634	0.00395186	10.1564	0.0172823	0.996467	13.9639	12.9734	12.7161	12.718	0.22241	-0.0598546	0.282726	0.00046186	1	169813183	169813254	72	+
ENSSSCG00000004983	ENSSSCG00000004983	1	169777596	169870892	E014	87.3634	0.00395186	10.1564	0.0172823	0.996467	13.9639	12.9734	12.7161	12.718	0.22241	-0.0598546	0.282726	0.00046186	1	169813183	169813254	72	+
ENSSSCG00000004983	ENSSSCG00000004983	1	169777596	169870892	E014	87.3634	0.00395186	10.1564	0.0172823	0.996467	13.9639	12.9734	12.7161	12.718	0.22241	-0.0598546	0.282726	0.00046186	1	169813183	169813254	72	+
ENSSSCG00000004983	ENSSSCG00000004983	1	169777596	169870892	E014	87.3634	0.00395186	10.1564	0.0172823	0.996467	13.9639	12.9734	12.7161	12.718	0.22241	-0.0598546	0.282726	0.00046186	1	169813183	169813254	72	+
ENSSSCG00000004983	ENSSSCG00000004983	1	169777596	169870892	E014	87.3634	0.00395186	10.1564	0.0172823	0.996467	13.9639	12.9734	12.7161	12.718	0.22241	-0.0598546	0.282726	0.00046186	1	169813183	169813254	72	+
ENSSSCG00000004985	GEMIN2	1	169676156	169701481	E005	70.7005	0.0100429	12.0162	0.0073278	0.898743	12.3217	10.6831	11.3401	12.6467	0.426071	0.504278	0.248359	0.326566	1	169679220	169679279	60	+
ENSSSCG00000004999	MIS18BP1	1	175401390	175448276	E008	43.1974	0.0139902	9.63028	0.021985	1	9.2188	9.70185	10.1486	8.4165	-0.150846	-0.418955	-0.284112	-0.55222	1	175422949	175423106	158	-
ENSSSCG00000004999	MIS18BP1	1	175401390	175448276	E010	31.1544	0.0169707	8.18347	0.0423683	1	7.23274	7.74575	8.55139	8.5641	-0.200658	0.294884	-0.491174	0.00436711	1	175430281	175430411	131	-
ENSSSCG00000005000	FANCM	1	175334141	175400685	E003	7.41973	0.0938815	8.01741	0.0456532	1	4.26133	2.72671	4.17859	4.22405	1.29239	1.26691	0.0568472	0.0313674	1	175335243	175335415	173	+
ENSSSCG00000005002	MDGA2	1	176770071	177593876	E012	1.9472	0.151125	9.47121	0.0236397	1	2.7771	1.05874	1.63576	1.90324	2.78498	1.69318	1.52916	0.437358	1	176994764	176995093	330	-
ENSSSCG00000005002	MDGA2	1	176770071	177593876	E014	0.907581	0.562502	8.36265	0.0390822	1	0.549089	1.22407	2.76296	1.01926	-2.3136	-0.528504	-4.66502	-2.87992	1	177071099	177071231	133	-
ENSSSCG00000005011	NEMF	1	179622755	179670996	E033	34.1455	0.0485359	9.53046	0.0230095	1	8.8795	8.59058	9.0597	7.02157	0.0973693	-0.591268	-0.0592011	-0.747838	1	179670900	179670996	97	-
ENSSSCG00000005011	NEMF	1	179622755	179670996	E012	81.461	0.011086	10.1435	0.0173851	0.997644	11.9563	13.9538	12.4682	12.5398	-0.465422	-0.322496	-0.125733	0.0171936	1	179637791	179637911	121	-
ENSSSCG00000005016	L2HGDH	1	180020863	180069146	E009	14.5462	0.068257	8.03168	0.0453616	1	5.54204	5.28116	4.38961	6.43802	0.140205	0.576705	0.677026	1.11353	1	180042722	180042756	35	-
ENSSSCG00000005020	ATL1	1	180299256	180405837	E008	2.02236	0.251668	10.3778	0.015613	0.986323	2.91867	1.80931	1.01253	1.982	1.38175	0.263299	3.05756	1.93911	1	180364055	180364159	105	+
ENSSSCG00000005023	ABHD12B	1	180639898	180661065	E007	2.91814	0.356472	8.47149	0.0372091	1	1.11353	2.59397	2.64333	3.05231	-2.44216	0.47046	-2.49664	0.415974	1	180647939	180648068	130	+
ENSSSCG00000005024	PYGL	1	180620314	180719979	E039	20.1271	0.0268172	9.78668	0.0204693	1	6.42793	5.43241	7.25343	6.82881	0.490036	0.666625	-0.352931	-0.176342	1	180704285	180704310	26	-
ENSSSCG00000005024	PYGL	1	180620314	180719979	E038	20.5811	0.0335607	8.93544	0.0301616	1	6.39159	5.54902	7.39152	6.88712	0.411727	0.629691	-0.424653	-0.20669	1	180704282	180704284	3	-
ENSSSCG00000005025	TRIM9	1	180723287	180830243	E014	0.73822	0.560515	9.15311	0.0273229	1	2.34847	0.0105703	1.41167	0.507338	15.5932	11.1698	1.46998	-2.95343	1	180758038	180758148	111	-
ENSSSCG00000005027	FRMD6	1	181338525	181416840	E004	111.289	0.0055859	11.4681	0.0094462	0.925506	15.8199	14.3748	14.2508	14.8852	0.292904	0.106317	0.319255	0.132668	1	181383486	181383576	91	+
ENSSSCG00000005027	FRMD6	1	181338525	181416840	E005	96.0856	0.0100649	9.00456	0.0292304	1	14.6318	13.4051	13.1368	13.9919	0.26568	0.129717	0.326717	0.190753	1	181386971	181387050	80	+
ENSSSCG00000005030	NID2	1	181699106	181815167	E017	330.899	0.00190816	11.3207	0.0101125	0.929753	24.7989	23.2498	24.5351	24.5832	0.213768	0.184609	0.0356977	0.00653852	1	181742861	181743095	235	-
ENSSSCG00000005030	NID2	1	181699106	181815167	E023	200.332	0.0029114	10.5937	0.0141387	0.973906	20.4606	18.9988	18.9171	19.405	0.235513	0.0668957	0.249118	0.080501	1	181762841	181763073	233	-
ENSSSCG00000005030	NID2	1	181699106	181815167	E009	298.909	0.00376722	9.57621	0.0225342	1	23.1556	22.8834	22.3602	23.966	0.0387847	0.152234	0.114356	0.227805	1	181707948	181708169	222	-
ENSSSCG00000005030	NID2	1	181699106	181815167	E018	162.077	0.00712155	8.88468	0.0308641	1	17.9954	16.1576	17.7953	18.1977	0.334482	0.369496	0.0349623	0.0699767	1	181743096	181743106	11	-
ENSSSCG00000005030	NID2	1	181699106	181815167	E010	286.242	0.00334163	7.91356	0.0478324	1	22.3971	22.8038	22.1116	23.4272	-0.0587847	0.0885486	0.0417489	0.189082	1	181711974	181712204	231	-
ENSSSCG00000005037	ERO1A	1	182265261	182318195	E020	27.3384	0.0810229	8.96195	0.0298011	1	8.59363	6.49265	8.57343	6.40705	0.821014	-0.0387169	0.00692046	-0.852811	1	182318184	182318195	12	-
ENSSSCG00000005038	PSMC6	1	182328521	182354958	E011	434.914	0.00241181	10.0531	0.0181205	1	28.1193	26.694	26.8768	27.5108	0.178864	0.103287	0.155564	0.079987	1	182335825	182335939	115	+
ENSSSCG00000005038	PSMC6	1	182328521	182354958	E018	336.435	0.0026749	12.2798	0.00648355	0.884077	23.5406	25.4187	24.6088	24.3268	-0.255611	-0.146836	-0.147163	-0.038388	1	182348428	182348499	72	+
ENSSSCG00000005038	PSMC6	1	182328521	182354958	E020	25.9421	0.0294711	11.4548	0.00950462	0.926043	6.55562	8.38612	7.59419	6.63485	-0.720981	-0.685918	-0.429938	-0.394874	1	182354955	182354955	1	+
ENSSSCG00000005038	PSMC6	1	182328521	182354958	E017	296.419	0.00152202	10.9874	0.0117943	0.951257	22.8982	23.8894	23.4125	22.4569	-0.139527	-0.203142	-0.0729543	-0.136569	1	182344432	182344512	81	+
ENSSSCG00000005039	STYX	1	182357607	182407782	E004	34.3416	0.0111694	7.87764	0.0486093	1	8.65113	7.64281	8.84094	8.52388	0.363837	0.320248	-0.0638884	-0.107477	1	182375387	182375440	54	+
ENSSSCG00000005041	FERMT2	1	182519684	182606869	E002	4.14473	0.0619737	8.06347	0.044718	1	3.08659	3.66646	2.15705	2.57883	-0.498239	-1.01794	1.03577	0.516077	1	182519685	182519686	2	-
ENSSSCG00000005043	DDHD1	1	182667428	182754207	E010	39.1005	0.0176653	8.95143	0.0299437	1	9.47774	8.93545	9.41217	7.91362	0.173811	-0.356971	0.020504	-0.510278	1	182704711	182704817	107	-
ENSSSCG00000005056	DLGAP5	1	184501182	184549993	E024	130.391	0.00621302	8.0081	0.0458447	1	15.8583	14.9063	16.3223	15.5942	0.189702	0.138114	-0.0888589	-0.140447	1	184549868	184549965	98	-
ENSSSCG00000005057	FBXO34	1	184599599	184689938	E002	2.02895	0.117992	9.66964	0.0215935	1	2.27169	1.50644	1.61722	2.86013	1.18635	1.85214	0.981467	1.64725	1	184599616	184599637	22	+
ENSSSCG00000005057	FBXO34	1	184599599	184689938	E003	3.76053	0.186285	9.08943	0.0281252	1	3.46131	1.93496	2.39817	3.41391	1.68117	1.64127	1.06115	1.02125	1	184599638	184599650	13	+
ENSSSCG00000005057	FBXO34	1	184599599	184689938	E005	38.1895	0.0243554	7.86674	0.0488476	1	9.06576	8.28888	9.37162	8.36635	0.263642	0.0273357	-0.097888	-0.334195	1	184599669	184599765	97	+
ENSSSCG00000005057	FBXO34	1	184599599	184689938	E004	5.63674	0.174441	8.45244	0.0375305	1	4.23711	2.51996	3.00297	3.80278	1.5038	1.19042	0.996797	0.683416	1	184599651	184599668	18	+
ENSSSCG00000005062	TMEM260	1	185821518	185884921	E006	22.8126	0.0196025	9.59438	0.0223483	1	6.83334	5.89242	6.97657	7.64682	0.43203	0.761067	-0.0606098	0.268427	1	185827740	185827891	152	+
ENSSSCG00000005066	EXOC5	1	186377458	186529728	E023	83.8186	0.00887078	9.87977	0.0196163	1	13.4863	12.0559	13.4236	12.7358	0.337366	0.1647	0.0140797	-0.158587	1	186406908	186407017	110	-
ENSSSCG00000005066	EXOC5	1	186377458	186529728	E004	34.4851	0.0186754	9.66387	0.0216505	1	7.23948	9.19861	8.6452	8.5657	-0.70334	-0.209973	-0.520545	-0.0271779	1	186381487	186381704	218	-
ENSSSCG00000005066	EXOC5	1	186377458	186529728	E003	11.595	0.0241597	21.1904	9.6114e-05	0.307831	5.23289	6.03861	3.65847	4.24066	-0.416689	-1.02692	1.03808	0.427853	1	186379078	186379129	52	-
ENSSSCG00000005072	PSMA3	1	187343507	187372193	E015	96.5022	0.00874957	9.35102	0.0249702	1	13.6168	14.0318	14.8221	12.9725	-0.0909733	-0.23733	-0.257721	-0.404078	1	187370589	187372193	1605	+
ENSSSCG00000005073	ARID4A	1	187385332	187452540	E003	46.1226	0.0172732	12.8142	0.00505608	0.83011	10.763	9.00568	9.78763	8.95604	0.527562	-0.0162867	0.281714	-0.262134	1	187386621	187386677	57	+
ENSSSCG00000005073	ARID4A	1	187385332	187452540	E014	68.9866	0.00555567	8.30446	0.0401212	1	11.5887	12.3262	12.0156	10.9435	-0.184718	-0.355526	-0.108204	-0.279011	1	187425893	187425987	95	+
ENSSSCG00000005073	ARID4A	1	187385332	187452540	E002	41.1571	0.0319368	8.27732	0.040615	1	10.1038	8.73164	9.23704	8.26495	0.431004	-0.161517	0.265187	-0.327334	1	187385385	187385530	146	+
ENSSSCG00000005076	KIAA0586	1	187504638	187642492	E002	12.7478	0.0835697	8.57956	0.035436	1	5.37009	5.08966	5.97346	4.15045	0.155873	-0.591925	-0.309855	-1.05765	1	187505260	187505323	64	+
ENSSSCG00000005076	KIAA0586	1	187504638	187642492	E006	8.96059	0.0313759	7.83194	0.0496158	1	5.14477	3.89829	4.40012	3.8834	0.80484	-0.0110901	0.453848	-0.362083	1	187513111	187513180	70	+
ENSSSCG00000005081	LRRC9	1	188966688	189081731	E031	0.680653	0.37854	8.0469	0.0450522	1	1.93286	0.944694	0.00481646	0.695437	2.06672	-0.884009	17.2985	14.3478	1	189079282	189079450	169	+
ENSSSCG00000005096	HIF1A	1	190625244	190674845	E001	515.756	0.00632658	13.748	0.00326903	0.764246	29.9703	29.4838	30.0713	27.9153	0.057802	-0.190777	-0.0119332	-0.260513	1	190625244	190625617	374	+
ENSSSCG00000005105	MRPL46	1	191321999	191331319	E004	185.158	0.00555334	9.38571	0.0245788	1	18.1686	19.4499	18.2279	19.08	-0.214732	-0.0607406	-0.010213	0.143779	1	191330933	191331319	387	+
ENSSSCG00000005110	SYNE2	1	193911965	194264354	E006	51.5324	0.0220523	8.03787	0.0452355	1	10.2733	10.8053	8.8329	10.8082	-0.14996	0.000799531	0.446356	0.597116	1	193917447	193917647	201	-
ENSSSCG00000005110	SYNE2	1	193911965	194264354	E027	12.9949	0.101994	7.88007	0.0485565	1	5.84107	5.9852	3.99766	4.69104	-0.0709851	-0.70826	1.10108	0.463809	1	193977355	193977483	129	-
ENSSSCG00000005110	SYNE2	1	193911965	194264354	E003	39.0698	0.0434274	9.54487	0.0228588	1	7.47356	10.0298	8.47526	9.4254	-0.865918	-0.183825	-0.369019	0.313074	1	193913734	193913817	84	-
ENSSSCG00000005110	SYNE2	1	193911965	194264354	E115	5.05772	0.125344	7.88668	0.0484126	1	3.49359	2.44005	4.14552	2.86574	1.03799	0.464855	-0.495591	-1.06872	1	194152169	194152306	138	-
ENSSSCG00000005110	SYNE2	1	193911965	194264354	E095	4.62759	0.158494	8.95494	0.029896	1	3.02074	1.82431	3.86747	3.4595	1.45732	1.84972	-0.715205	-0.322799	1	194112345	194112524	180	-
ENSSSCG00000005110	SYNE2	1	193911965	194264354	E063	6.29381	0.128102	10.9362	0.0120757	0.958178	4.13396	2.75658	4.53486	2.8542	1.17291	0.100622	-0.268396	-1.34069	1	194031368	194031499	132	-
ENSSSCG00000005110	SYNE2	1	193911965	194264354	E087	4.20871	0.0797018	9.89667	0.0194652	1	3.57284	2.86623	3.23185	2.16244	0.637574	-0.814345	0.290311	-1.16161	1	194098518	194098689	172	-
ENSSSCG00000005110	SYNE2	1	193911965	194264354	E114	4.5605	0.116373	12.9149	0.00482421	0.825801	3.64295	2.29091	3.95607	2.21752	1.34144	-0.0940816	-0.238832	-1.67435	1	194145121	194145285	165	-
ENSSSCG00000005110	SYNE2	1	193911965	194264354	E113	2.79236	0.177096	10.7975	0.0128726	0.968057	2.9086	1.22565	3.10853	2.01011	2.49623	1.42843	-0.192273	-1.26007	1	194144381	194144493	113	-
ENSSSCG00000005166	MLLT3	1	202318929	202607058	E010	31.7557	0.0225687	14.4854	0.00231369	0.726036	8.33145	8.55681	6.35583	7.81976	-0.078461	-0.264499	0.792047	0.60601	1	202593614	202593685	72	+
ENSSSCG00000005166	MLLT3	1	202318929	202607058	E001	12.8173	0.0429138	9.38372	0.0246011	1	5.2778	4.11682	6.08609	5.2777	0.720988	0.720929	-0.414667	-0.414726	1	202318929	202319147	219	+
ENSSSCG00000005169	ENSSSCG00000005169	1	203444450	203451468	E003	6199.83	0.000568365	12.196	0.00674116	0.892702	67.3523	66.3326	66.8057	66.244	0.0869157	-0.0075667	0.0465688	-0.0479136	1	203445015	203445060	46	+
ENSSSCG00000005173	HAUS6	1	203720264	203771138	E011	30.484	0.0353973	8.10837	0.0438242	1	8.65583	6.78273	7.83557	8.03972	0.714643	0.497668	0.292429	0.0754531	1	203737852	203738045	194	+
ENSSSCG00000005178	CNTLN	1	205370499	205697786	E012	48.2355	0.00784864	9.20279	0.0267127	1	9.31059	10.192	10.6592	9.48075	-0.267542	-0.214065	-0.400568	-0.347092	1	205471769	205472310	542	-
ENSSSCG00000005180	BNC2	1	205925091	206372121	E012	1.38737	0.201256	10.5171	0.0146455	0.9769	1.12072	2.55414	1.74472	0.954303	-2.37883	-2.84279	-1.27781	-1.74177	1	206372120	206372120	1	+
ENSSSCG00000005182	CCDC171	1	206792212	207142837	E012	2.97557	0.153497	11.8847	0.00778867	0.903809	3.02246	2.41347	2.98121	1.31992	0.650489	-1.74288	0.0397473	-2.35362	1	206983859	206984026	168	-
ENSSSCG00000005182	CCDC171	1	206792212	207142837	E013	2.9653	0.12155	16.0017	0.00113306	0.651352	2.81805	2.85466	2.81397	1.08236	-0.0373232	-2.80096	0.00419609	-2.75944	1	206986158	206986358	201	-
ENSSSCG00000005182	CCDC171	1	206792212	207142837	E026	0.495492	0.527925	9.45337	0.0238326	1	1.94605	0.0155472	0.691139	0.014351	13.937	-0.231002	2.98827	-11.1797	1	207142808	207142837	30	-
ENSSSCG00000005182	CCDC171	1	206792212	207142837	E014	1.08505	0.220056	9.71716	0.0211299	1	1.3314	2.22942	0.0160411	1.41904	-1.48867	-1.30464	12.7507	12.9348	1	206987491	206987580	90	-
ENSSSCG00000005184	SNAPC3	1	207215738	207252396	E009	30.419	0.0173694	16.4596	0.000912655	0.623035	8.31846	6.87678	8.38102	7.87539	0.557526	0.396858	-0.0220159	-0.182683	1	207232847	207232996	150	-
ENSSSCG00000005184	SNAPC3	1	207215738	207252396	E010	35.1282	0.0545492	8.82616	0.0316938	1	8.51062	7.43971	9.18813	8.61488	0.394551	0.430364	-0.225585	-0.189772	1	207234798	207234902	105	-
ENSSSCG00000005184	SNAPC3	1	207215738	207252396	E008	19.0881	0.0193924	8.5352	0.0361536	1	6.7648	5.83879	5.79954	6.54509	0.42921	0.332824	0.448847	0.352461	1	207225095	207225177	83	-
ENSSSCG00000005190	NFIB	1	208175194	208421602	E022	58.1224	0.0267735	8.71346	0.0333535	1	9.81107	11.7749	11.893	10.0232	-0.542595	-0.479287	-0.572457	-0.509149	1	208420875	208421031	157	+
ENSSSCG00000005191	MPDZ	1	209181467	209349297	E023	1.78173	0.294854	9.18654	0.0269108	1	1.59866	2.25491	0.657625	2.61194	-0.993385	0.42477	2.56386	3.98202	1	209275694	209275795	102	+
ENSSSCG00000005194	PTPRD	1	213483348	214009893	E032	3.88644	0.069867	11.0452	0.0114841	0.948034	3.73681	2.202	2.47756	2.80574	1.52948	0.700289	1.18878	0.35959	1	213896229	213896270	42	+
ENSSSCG00000005194	PTPRD	1	213483348	214009893	E048	24.418	0.0385326	7.82027	0.0498758	1	6.48776	8.07385	7.0216	6.76724	-0.639889	-0.51678	-0.230914	-0.107806	1	214009840	214009893	54	+
ENSSSCG00000005194	PTPRD	1	213483348	214009893	E041	93.0322	0.0112754	9.37813	0.0246639	1	12.4521	14.3099	13.7505	14.0486	-0.420091	-0.0559767	-0.299085	0.0650289	1	214000409	214000534	126	+
[truncated: 9,524 more rows]
