# Supplementary material for: Integrative multi-omics analysis of growth plate regulation underlying body size in miniature pigs
Source: Research Square preprint supplement (doi:10.21203/rs.3.rs-7865536/v1), 2025-12-01
Supplement: Supplementary file 9 [file c3a5c8020d743e5a0b33f9e0.xlsx]

## Sheet: AM_DEG&PPI
Supplementary Data 9. Complete list of significant terms (p-value < 0.05) enriched from KEGG, Reactome as well as MGI_Mammalian phenotype are shown in separate tables corresponding to the input gene set from differentially expressed gene (DEG) and Protein-Protein interactions (PPI) as well as coding and non-coding candidate variants in both AM and ML. Each term are presented with number of overla…
Data base	Term	Overlap	P.value	Adjusted.P.value	Odds.Ratio	Combined.Score	Genes
KEGG_2021_Human	Complement and coagulation cascades	8/85	8.77085e-09	1.37702e-06	22.886	424.577	VTN;VWF;C7;FGG;SERPING1;PLG;F2;CLU
KEGG_2021_Human	Coronavirus disease	9/232	2.09225e-06	0.000164242	8.92382	116.699	SELP;C7;VWF;RPL31;FGG;RPL11;MX1;ISG15;F2
KEGG_2021_Human	ECM-receptor interaction	6/88	4.64687e-06	0.000243186	15.7635	193.565	VTN;COL2A1;VWF;ITGA2B;FN1;GP5
KEGG_2021_Human	Platelet activation	6/124	3.32331e-05	0.0013044	10.9344	112.755	PLA2G4F;VWF;ITGA2B;FGG;F2;GP5
KEGG_2021_Human	Human papillomavirus infection	8/331	0.000223516	0.0070184	5.3881	45.2925	RBPJL;VTN;COL2A1;VWF;ITGA2B;MX1;FN1;ISG15
KEGG_2021_Human	Neutrophil extracellular trap formation	6/189	0.000336928	0.00881627	7.02744	56.1889	SELP;VWF;ITGA2B;FGG;MPO;ELANE
KEGG_2021_Human	Alanine, aspartate and glutamate metabolism	3/37	0.000785459	0.0176167	18.4533	131.927	GFPT2;GFPT1;ASNS
KEGG_2021_Human	PI3K-Akt signaling pathway	7/354	0.00178901	0.0351093	4.33496	27.4234	VTN;GNG3;COL2A1;VWF;ITGA2B;FN1;INS
KEGG_2021_Human	Focal adhesion	5/201	0.00311229	0.0509771	5.40542	31.2022	VTN;COL2A1;VWF;ITGA2B;FN1
KEGG_2021_Human	Diabetic cardiomyopathy	5/203	0.00324695	0.0509771	5.35028	30.6573	ATP5F1B;ATP8;GFPT2;GFPT1;INS
KEGG_2021_Human	Regulation of actin cytoskeleton	5/218	0.00439429	0.0627186	4.96971	26.9728	CXCL12;ITGA2B;FN1;F2;INS
KEGG_2021_Human	Maturity onset diabetes of the young	2/26	0.00715431	0.0936022	17.2552	85.2414	HNF4A;INS
KEGG_2021_Human	Staphylococcus aureus infection	3/95	0.0114062	0.137752	6.79977	30.4194	SELP;FGG;PLG
KEGG_2021_Human	African trypanosomiasis	2/37	0.0141583	0.158775	11.8256	50.3469	VCAM1;APOA1
KEGG_2021_Human	Insulin resistance	3/108	0.0160763	0.168265	5.95398	24.5924	GFPT2;GFPT1;INS
KEGG_2021_Human	AMPK signaling pathway	3/120	0.0212088	0.193882	5.34008	20.5771	HNF4A;PFKP;INS
KEGG_2021_Human	Amino sugar and nucleotide sugar metabolism	2/48	0.0231611	0.193882	8.99275	33.8602	GFPT2;GFPT1
KEGG_2021_Human	Ether lipid metabolism	2/49	0.0240708	0.193882	8.80098	32.7991	PLA2G4F;GDPD1
KEGG_2021_Human	Cholesterol metabolism	2/50	0.0249949	0.193882	8.61719	31.7895	VAPB;APOA1
KEGG_2021_Human	Malaria	2/50	0.0249949	0.193882	8.61719	31.7895	SELP;VCAM1
KEGG_2021_Human	Ovarian steroidogenesis	2/51	0.0259333	0.193882	8.4409	30.8281	PLA2G4F;INS
KEGG_2021_Human	Cell adhesion molecules	3/148	0.0362782	0.247638	4.30279	14.2704	SELP;VCAM1;CDH15
KEGG_2021_Human	Phospholipase D signaling pathway	3/148	0.0362782	0.247638	4.30279	14.2704	PLA2G4F;F2;INS
Reactome_Pathways_2024	Platelet Degranulation	13/128	5.50178e-14	1.93297e-11	26.3152	803.432	LGALS3BP;VWF;ITGA2B;FGG;FN1;APOA1;PLG;PPBP;CLU;SELP;POTEKP;ALB;SERPING1
Reactome_Pathways_2024	Response to Elevated Platelet Cytosolic Ca2+	13/133	9.09635e-14	1.93297e-11	25.2124	757.085	LGALS3BP;VWF;ITGA2B;FGG;FN1;APOA1;PLG;PPBP;CLU;SELP;POTEKP;ALB;SERPING1
Reactome_Pathways_2024	Platelet Activation, Signaling and Aggregation	16/262	1.7276e-13	2.44744e-11	15.5907	458.162	LGALS3BP;VWF;ITGA2B;FGG;FN1;APOA1;PLG;PPBP;F2;CLU;GP5;SELP;POTEKP;GNG3;ALB;SERPING1
Reactome_Pathways_2024	Extracellular Matrix Organization	13/300	2.57981e-09	2.74105e-07	10.4528	206.709	VCAM1;MUSK;VWF;ITGA2B;FGG;FN1;PLG;VTN;COL2A1;ADAMTS1;MATN1;MATN4;ELANE
Reactome_Pathways_2024	Platelet Aggregation (Plug Formation)	6/39	3.39354e-08	2.88451e-06	39.2668	675.342	VWF;ITGA2B;FGG;FN1;F2;GP5
Reactome_Pathways_2024	ECM Proteoglycans	7/76	9.0525e-08	6.41219e-06	22.1104	358.578	VTN;COL2A1;MUSK;ITGA2B;MATN1;FN1;MATN4
Reactome_Pathways_2024	Integrin Cell Surface Interactions	7/85	1.97185e-07	1.19719e-05	19.5503	301.839	VTN;COL2A1;VCAM1;VWF;ITGA2B;FGG;FN1
Reactome_Pathways_2024	Hemostasis	16/707	3.19882e-07	1.69937e-05	5.42473	81.1285	LGALS3BP;VWF;ITGA2B;FGG;FN1;APOA1;PLG;PPBP;F2;CLU;GP5;SELP;POTEKP;GNG3;ALB;SERPING1
Reactome_Pathways_2024	p130Cas Linkage to MAPK Signaling for Integrins	4/15	7.09748e-07	3.01643e-05	76.9478	1089.45	VWF;FGG;ITGA2B;FN1
Reactome_Pathways_2024	GRB2 SOS Provides Linkage to MAPK Signaling for Integrins	4/15	7.09748e-07	3.01643e-05	76.9478	1089.45	VWF;FGG;ITGA2B;FN1
Reactome_Pathways_2024	Defects of Contact Activation System (CAS) and Kallikrein Kinin System (KKS)	4/16	9.4278e-07	3.64256e-05	70.5319	978.59	VWF;SERPING1;F2;GP5
Reactome_Pathways_2024	Formation of Fibrin Clot (Clotting Cascade)	5/39	1.28561e-06	4.55321e-05	31.4168	426.146	VWF;FGG;SERPING1;F2;GP5
Reactome_Pathways_2024	Diseases of Hemostasis	4/19	1.9853e-06	6.49039e-05	56.417	740.741	VWF;SERPING1;F2;GP5
Reactome_Pathways_2024	Intrinsic Pathway of Fibrin Clot Formation	4/23	4.46788e-06	0.000135632	44.5308	548.557	VWF;SERPING1;F2;GP5
Reactome_Pathways_2024	Complement Cascade	7/139	5.49759e-06	0.000155765	11.521	139.533	FCN1;VTN;C7;SERPING1;F2;CLU;ELANE
Reactome_Pathways_2024	Integrin Signaling	4/27	8.72296e-06	0.000231704	36.7789	428.458	VWF;ITGA2B;FGG;FN1
Reactome_Pathways_2024	Signaling by High-Kinase Activity BRAF Mutants	4/36	2.8305e-05	0.000707626	26.4229	276.713	VWF;ITGA2B;FGG;FN1
Reactome_Pathways_2024	Regulation of IGF Transport and Uptake by Insulin-like Growth Factor Binding Proteins (IGFBPs)	6/124	3.32331e-05	0.00078467	10.9344	112.755	ALB;FGG;FN1;APOA1;PLG;F2
Reactome_Pathways_2024	Innate Immune System	17/1149	3.95864e-05	0.000844348	3.48002	35.2771	FCN1;CDA;DEFB104A;FGG;ISG15;PPBP;F2;CLU;MPO;LGALS3;VTN;C7;PKP1;SERPING1;TLR5;ELANE;LTF
Reactome_Pathways_2024	Regulation of Complement Cascade	6/128	3.9734e-05	0.000844348	10.5738	107.147	VTN;C7;SERPING1;F2;CLU;ELANE
Reactome_Pathways_2024	MAP2K and MAPK Activation	4/40	4.32606e-05	0.000875512	23.4823	235.956	VWF;ITGA2B;FGG;FN1
Reactome_Pathways_2024	Signaling by RAF1 Mutants	4/41	4.7758e-05	0.000922597	22.8465	227.308	VWF;ITGA2B;FGG;FN1
Reactome_Pathways_2024	Paradoxical Activation of RAF Signaling by Kinase Inactive BRAF	4/45	6.92186e-05	0.00113146	20.6134	197.44	VWF;ITGA2B;FGG;FN1
Reactome_Pathways_2024	Signaling by RAS Mutants	4/45	6.92186e-05	0.00113146	20.6134	197.44	VWF;ITGA2B;FGG;FN1
Reactome_Pathways_2024	Signaling by Moderate Kinase Activity BRAF Mutants	4/45	6.92186e-05	0.00113146	20.6134	197.44	VWF;ITGA2B;FGG;FN1
Reactome_Pathways_2024	Signaling Downstream of RAS Mutants	4/45	6.92186e-05	0.00113146	20.6134	197.44	VWF;ITGA2B;FGG;FN1
Reactome_Pathways_2024	Immune System	24/2150	8.43821e-05	0.00132824	2.71175	25.4367	FCN1;CDA;DEFB104A;VCAM1;FGG;MX1;FN1;IFI6;ISG15;PPBP;F2;CLU;MPO;LGALS3;VTN;COL2A1;C7;TRIM46;PKP1;SERPING1;CALR;TLR5;ELANE;LTF
Reactome_Pathways_2024	Signaling by BRAF and RAF1 Fusions	4/65	0.000291838	0.00442968	13.8409	112.656	VWF;ITGA2B;FGG;FN1
Reactome_Pathways_2024	Defective Binding of VWF Variant to GPIb IX V	2/7	0.000491147	0.00673346	82.9042	631.628	VWF;GP5
Reactome_Pathways_2024	Defective Factor VIII Causes Hemophilia A	2/7	0.000491147	0.00673346	82.9042	631.628	VWF;F2
Reactome_Pathways_2024	Enhanced Binding of GP1BA Variant to VWF Multimer Collagen	2/7	0.000491147	0.00673346	82.9042	631.628	VWF;GP5
Reactome_Pathways_2024	Degradation of the Extracellular Matrix	5/140	0.000630531	0.00792651	7.87216	58.0096	COL2A1;ADAMTS1;FN1;PLG;ELANE
Reactome_Pathways_2024	Defects of Platelet Adhesion to Exposed Collagen	2/8	0.000652771	0.00792651	69.0833	506.677	VWF;GP5
Reactome_Pathways_2024	Synthesis of UDP-N-acetyl-glucosamine	2/8	0.000652771	0.00792651	69.0833	506.677	GFPT2;GFPT1
Reactome_Pathways_2024	Terminal Pathway of Complement	2/8	0.000652771	0.00792651	69.0833	506.677	C7;CLU
Reactome_Pathways_2024	Oncogenic MAPK Signaling	4/82	0.000707538	0.00835287	10.8151	78.4494	VWF;ITGA2B;FGG;FN1
Reactome_Pathways_2024	Atorvastatin ADME	2/9	0.000836599	0.0093567	59.2113	419.581	PON3;PON1
Reactome_Pathways_2024	Synthesis of 5-Eicosatetraenoic Acids	2/9	0.000836599	0.0093567	59.2113	419.581	PON3;PON1
Reactome_Pathways_2024	Metabolism of Proteins	21/2067	0.000907683	0.00989142	2.38017	16.6721	RPL31;GFPT2;GFPT1;FGG;RPL11;FN1;APOA1;PLG;F2;INS;GNG3;ATP5F1B;ASPH;ADAMTS1;A4GNT;ALB;CALR;IARS1;RAB17;GPLD1;LTF
Reactome_Pathways_2024	HDL Remodeling	2/10	0.00104241	0.0110756	51.8073	355.72	ALB;APOA1
Reactome_Pathways_2024	Antimicrobial Peptides	4/95	0.00122688	0.0127177	9.26397	62.099	DEFB104A;CLU;ELANE;LTF
Reactome_Pathways_2024	GP1b-IX-V Activation Signalling	2/12	0.00151913	0.0153722	41.4417	268.94	VWF;GP5
Reactome_Pathways_2024	Post-translational Protein Phosphorylation	4/107	0.00190192	0.0187981	8.17971	51.245	ALB;FGG;FN1;APOA1
Reactome_Pathways_2024	Drug ADME	4/109	0.00203512	0.0196574	8.0231	49.7208	PON3;GLYATL2;ALB;PON1
Reactome_Pathways_2024	Neutrophil Degranulation	8/478	0.00241572	0.0228152	3.67508	22.1452	FCN1;CDA;LGALS3;PKP1;PPBP;MPO;ELANE;LTF
Reactome_Pathways_2024	Platelet Adhesion to Exposed Collagen	2/16	0.00272703	0.0251954	29.5952	174.746	VWF;GP5
Reactome_Pathways_2024	Non-integrin membrane-ECM Interactions	3/59	0.00304029	0.0271078	11.1914	64.8629	VTN;COL2A1;FN1
Reactome_Pathways_2024	Binding and Uptake of Ligands by Scavenger Receptors	4/122	0.00306159	0.0271078	7.13451	41.3004	HPX;ALB;APOA1;CALR
Reactome_Pathways_2024	Scavenging by Class A Receptors	2/19	0.00384904	0.0333845	24.3689	135.489	APOA1;CALR
Reactome_Pathways_2024	Metabolism	20/2181	0.00412017	0.0350215	2.10503	11.5605	CDA;PON3;GLYATL2;PLA2G4F;GK;RPL31;PON1;RPL11;GDPD1;ASNS;APOA1;INS;GNG3;ATP5F1B;MAT2A;VAPB;ALB;IARS1;GC;PFKP
Reactome_Pathways_2024	Regulation of Gene Expression in Beta Cells	2/21	0.00469688	0.0391407	21.8015	116.875	HNF4A;INS
Reactome_Pathways_2024	Common Pathway of Fibrin Clot Formation	2/22	0.00515015	0.0420926	20.7104	109.118	FGG;F2
Reactome_Pathways_2024	Interferon Alpha Beta Signaling	3/78	0.00665431	0.05336	8.34821	41.8453	MX1;IFI6;ISG15
Reactome_Pathways_2024	Amyloid Fiber Formation	3/80	0.00713615	0.0561641	8.13055	40.1859	APOA1;LTF;INS
Reactome_Pathways_2024	Syndecan Interactions	2/27	0.00770215	0.0595166	16.5642	80.6055	VTN;FN1
Reactome_Pathways_2024	MET Activates PTK2 Signaling	2/30	0.00945492	0.071628	14.7872	68.9264	COL2A1;FN1
Reactome_Pathways_2024	Influenza Infection	4/169	0.00960658	0.071628	5.09014	23.6452	RPL31;RPL11;ISG15;CALR
Reactome_Pathways_2024	RAF MAP Kinase Cascade	5/265	0.00983291	0.0720515	4.06162	18.7729	VWF;ITGA2B;FGG;FN1;GFRA4
Reactome_Pathways_2024	Scavenging of Heme From Plasma	3/92	0.0104579	0.0749598	7.03004	32.0598	HPX;ALB;APOA1
Reactome_Pathways_2024	Thrombin Signalling Through Proteinase Activated Receptors (PARs)	2/32	0.0107126	0.0749598	13.8	62.6014	GNG3;F2
Reactome_Pathways_2024	MAPK1 MAPK3 Signaling	5/271	0.0107589	0.0749598	3.96879	17.9866	VWF;ITGA2B;FGG;FN1;GFRA4
Reactome_Pathways_2024	Activation of Matrix Metalloproteinases	2/33	0.0113677	0.0757519	13.3542	59.7864	PLG;ELANE
Reactome_Pathways_2024	Unfolded Protein Response (UPR)	3/95	0.0114062	0.0757519	6.79977	30.4194	GFPT1;ASNS;CALR
Reactome_Pathways_2024	Post-translational Protein Modification	14/1457	0.0114073	0.0757519	2.13202	9.53757	GFPT2;GFPT1;FGG;FN1;APOA1;F2;INS;ASPH;ADAMTS1;A4GNT;ALB;CALR;RAB17;GPLD1
Reactome_Pathways_2024	Plasma Lipoprotein Remodeling	2/34	0.0120399	0.0775722	12.9362	57.1719	ALB;APOA1
Reactome_Pathways_2024	Metabolism of Lipids	9/758	0.0120465	0.0775722	2.58587	11.4269	PON3;PLA2G4F;GK;VAPB;ALB;PON1;GDPD1;APOA1;GC
Reactome_Pathways_2024	Interferon Signaling	5/280	0.0122574	0.0777524	3.83715	16.8897	VCAM1;MX1;IFI6;TRIM46;ISG15
Reactome_Pathways_2024	Diseases Associated With the TLR Signaling Cascade	2/35	0.0127292	0.0784048	12.5436	54.7383	FGG;TLR5
Reactome_Pathways_2024	Diseases of Immune System	2/35	0.0127292	0.0784048	12.5436	54.7383	FGG;TLR5
Reactome_Pathways_2024	Molecules Associated With Elastic Fibres	2/37	0.0141583	0.085961	11.8256	50.3469	VTN;FN1
Reactome_Pathways_2024	Response of EIF2AK4 (GCN2) to Amino Acid Deficiency	3/106	0.0152979	0.0915721	6.07021	25.3737	RPL31;RPL11;ASNS
Reactome_Pathways_2024	Peptide Ligand-Binding Receptors	4/198	0.0163541	0.0965344	4.32288	17.7812	CXCL12;PPBP;F2;RXFP2
Reactome_Pathways_2024	MET Promotes Cell Motility	2/41	0.017213	0.100213	10.6106	43.1011	COL2A1;FN1
Reactome_Pathways_2024	NCAM1 Interactions	2/42	0.0180167	0.102094	10.3448	41.5494	COL2A1;GFRA4
Reactome_Pathways_2024	Regulation of Beta-Cell Development	2/42	0.0180167	0.102094	10.3448	41.5494	HNF4A;INS
Reactome_Pathways_2024	Aspirin ADME	2/43	0.018836	0.105333	10.092	40.0852	GLYATL2;ALB
Reactome_Pathways_2024	MAPK Family Signaling Cascades	5/314	0.0191885	0.10591	3.40902	13.4774	VWF;ITGA2B;FGG;FN1;GFRA4
Reactome_Pathways_2024	Elastic Fibre Formation	2/44	0.0196707	0.10718	9.85119	38.7016	VTN;FN1
Reactome_Pathways_2024	GPER1 Signaling	2/45	0.0205208	0.110397	9.62161	37.3926	GNG3;FN1
Reactome_Pathways_2024	Selenoamino Acid Metabolism	3/122	0.0221416	0.117627	5.2498	20.0033	RPL31;RPL11;IARS1
Reactome_Pathways_2024	Ciprofloxacin ADME	1/5	0.0242633	0.121317	51.2835	190.713	ALB
Reactome_Pathways_2024	Ficolins Bind to Repetitive Carbohydrate Structures on the Target Cell Surface	1/5	0.0242633	0.121317	51.2835	190.713	FCN1
Reactome_Pathways_2024	HDL Clearance	1/5	0.0242633	0.121317	51.2835	190.713	APOA1
Reactome_Pathways_2024	IRAK4 Deficiency (TLR5)	1/5	0.0242633	0.121317	51.2835	190.713	TLR5
Reactome_Pathways_2024	IRS Activation	1/5	0.0242633	0.121317	51.2835	190.713	INS
Reactome_Pathways_2024	Mtb Iron Assimilation by Chelation	1/6	0.0290456	0.134008	41.0247	145.182	LTF
Reactome_Pathways_2024	Assembly of Viral Components at the Budding Site	1/6	0.0290456	0.134008	41.0247	145.182	CALR
Reactome_Pathways_2024	Conjugation of Benzoate With Glycine	1/6	0.0290456	0.134008	41.0247	145.182	GLYATL2
Reactome_Pathways_2024	Defective F9 Activation	1/6	0.0290456	0.134008	41.0247	145.182	GP5
Reactome_Pathways_2024	Fibronectin Matrix Formation	1/6	0.0290456	0.134008	41.0247	145.182	FN1
Reactome_Pathways_2024	Scavenging by Class B Receptors	1/6	0.0290456	0.134008	41.0247	145.182	APOA1
Reactome_Pathways_2024	Metal Sequestration by Antimicrobial Proteins	1/6	0.0290456	0.134008	41.0247	145.182	LTF
Reactome_Pathways_2024	Disease	17/2131	0.0293242	0.134008	1.76598	6.23275	VWF;RPL31;ITGA2B;GFPT1;FGG;RPL11;FN1;APOA1;ISG15;F2;GP5;GNG3;ADAMTS1;SERPING1;CALR;TLR5;LTF
Reactome_Pathways_2024	Cellular Responses to Stimuli	9/887	0.0298772	0.135083	2.19109	7.69217	GNG3;RPL31;GFPT1;ALB;RPL11;FN1;ASNS;APOA1;CALR
Reactome_Pathways_2024	Chemokine Receptors Bind Chemokines	2/57	0.0318558	0.142513	7.5178	25.9104	CXCL12;PPBP
Reactome_Pathways_2024	Signaling by PDGF	2/58	0.0328901	0.144234	7.38318	25.2105	COL2A1;PLG
Reactome_Pathways_2024	RUNX1 Regulates Transcription of Genes Involved in Differentiation of Myeloid Cells	1/7	0.0338047	0.144234	34.1856	115.792	LGALS3
Reactome_Pathways_2024	Scavenging by Class F Receptors	1/7	0.0338047	0.144234	34.1856	115.792	CALR
Reactome_Pathways_2024	Glycerophospholipid Catabolism	1/7	0.0338047	0.144234	34.1856	115.792	GDPD1
Reactome_Pathways_2024	Arachidonate Metabolism	2/59	0.0339374	0.144234	7.25329	24.5396	PON3;PON1
Reactome_Pathways_2024	Gamma Carboxylation, Hypusinylation, Hydroxylation, and Arylsulfatase Activation	2/61	0.0360708	0.151783	7.00671	23.2782	ASPH;F2
Reactome_Pathways_2024	NCAM Signaling for Neurite Out-Growth	2/63	0.0382547	0.153082	6.7763	22.1144	COL2A1;GFRA4
Reactome_Pathways_2024	Conjugation of Salicylate With Glycine	1/8	0.0385407	0.153082	29.3004	95.4034	GLYATL2
Reactome_Pathways_2024	Relaxin Receptors	1/8	0.0385407	0.153082	29.3004	95.4034	RXFP2
Reactome_Pathways_2024	HDL Assembly	1/8	0.0385407	0.153082	29.3004	95.4034	APOA1
Reactome_Pathways_2024	Lectin Pathway of Complement Activation	1/8	0.0385407	0.153082	29.3004	95.4034	FCN1
Reactome_Pathways_2024	Transport of Fatty Acids	1/8	0.0385407	0.153082	29.3004	95.4034	LCN9
Reactome_Pathways_2024	Collagen Degradation	2/64	0.0393652	0.153488	6.66667	21.5658	COL2A1;ELANE
Reactome_Pathways_2024	Synthesis of Substrates in N-glycan Biosythesis	2/64	0.0393652	0.153488	6.66667	21.5658	GFPT2;GFPT1
Reactome_Pathways_2024	G Alpha (S) Signalling Events	3/158	0.0426968	0.159851	4.02316	12.6876	GNG3;FN1;RXFP2
Reactome_Pathways_2024	Amino Acid Conjugation	1/9	0.0432537	0.159851	25.6366	80.5162	GLYATL2
Reactome_Pathways_2024	Conjugation of Carboxylic Acids	1/9	0.0432537	0.159851	25.6366	80.5162	GLYATL2
Reactome_Pathways_2024	Defective Factor IX Causes Hemophilia B	1/9	0.0432537	0.159851	25.6366	80.5162	GP5
Reactome_Pathways_2024	Hydrolysis of LPC	1/9	0.0432537	0.159851	25.6366	80.5162	PLA2G4F
Reactome_Pathways_2024	Gamma-carboxylated Protein Precursors Transport From the Endoplasmic Reticulum to Golgi Apparatus	1/9	0.0432537	0.159851	25.6366	80.5162	F2
Reactome_Pathways_2024	Cellular Response to Starvation	3/161	0.0447265	0.163868	3.94617	12.2615	RPL31;RPL11;ASNS
Reactome_Pathways_2024	ATF6 (ATF6-alpha) Activates Chaperone Genes	1/10	0.0479439	0.164324	22.7869	69.2204	CALR
Reactome_Pathways_2024	Prednisone ADME	1/10	0.0479439	0.164324	22.7869	69.2204	ALB
Reactome_Pathways_2024	Chylomicron Assembly	1/10	0.0479439	0.164324	22.7869	69.2204	APOA1
Reactome_Pathways_2024	Chylomicron Remodeling	1/10	0.0479439	0.164324	22.7869	69.2204	APOA1
Reactome_Pathways_2024	Removal of Aminoterminal Propeptides From Gamma-Carboxylated Proteins	1/10	0.0479439	0.164324	22.7869	69.2204	F2
Reactome_Pathways_2024	Signal Attenuation	1/10	0.0479439	0.164324	22.7869	69.2204	INS
Reactome_Pathways_2024	Gamma-carboxylation of Protein Precursors	1/10	0.0479439	0.164324	22.7869	69.2204	F2
Reactome_Pathways_2024	Virus Assembly and Release	1/10	0.0479439	0.164324	22.7869	69.2204	CALR
Reactome_Pathways_2024	Axon Guidance	6/541	0.0499558	0.16985	2.36087	7.07462	CXCL12;COL2A1;RPL31;ITGA2B;RPL11;GFRA4
MGI_Mammalian_Phenotype_Level_4_2024	Abnormal Blood Coagulation MP:0002551	7/51	5.29606e-09	4.62346e-06	34.7168	661.574	SELP;VTN;VWF;ITGA2B;FGG;PLG;F2
MGI_Mammalian_Phenotype_Level_4_2024	Abnormal Response To Injury MP:0005164	5/45	2.66543e-06	0.00116346	26.6962	342.65	VTN;VWF;PPBP;MPO;ELANE
MGI_Mammalian_Phenotype_Level_4_2024	Abnormal Platelet Aggregation MP:0009548	3/10	1.33522e-05	0.0038855	89.7519	1007.36	VTN;VWF;ITGA2B
MGI_Mammalian_Phenotype_Level_4_2024	Increased Bleeding Time MP:0005606	5/66	1.79757e-05	0.0039232	17.4872	191.074	SELP;VWF;ITGA2B;FGG;F2
MGI_Mammalian_Phenotype_Level_4_2024	Increased Susceptibility To Autoimmune Diabetes MP:0004803	3/16	6.09936e-05	0.0106495	48.3134	468.869	AIRE;TLR5;INS
MGI_Mammalian_Phenotype_Level_4_2024	Increased Susceptibility To Bacterial Infection MP:0002412	7/214	8.83339e-05	0.0128526	7.31884	68.3169	FCN1;SELP;LGALS3;VWF;FGG;TLR5;ELANE
MGI_Mammalian_Phenotype_Level_4_2024	Eye Inflammation MP:0001851	3/21	0.000142306	0.0177476	34.8842	308.988	SELP;AIRE;PLG
MGI_Mammalian_Phenotype_Level_4_2024	Internal Hemorrhage MP:0001634	4/79	0.000614643	0.0663955	11.2494	83.1831	VWF;ITGA2B;FGG;F2
MGI_Mammalian_Phenotype_Level_4_2024	Increased Susceptibility To Atherosclerosis MP:0005339	2/9	0.000836599	0.0663955	59.2113	419.581	PON3;PON1
MGI_Mammalian_Phenotype_Level_4_2024	Spinning MP:0001411	2/9	0.000836599	0.0663955	59.2113	419.581	SELP;COL2A1
MGI_Mammalian_Phenotype_Level_4_2024	Subcutaneous Hemorrhage MP:0031152	2/9	0.000836599	0.0663955	59.2113	419.581	ITGA2B;F2
MGI_Mammalian_Phenotype_Level_4_2024	Impaired Neutrophil Recruitment MP:0008719	3/43	0.0012213	0.0852851	15.6805	105.182	SELP;LGALS3;ELANE
MGI_Mammalian_Phenotype_Level_4_2024	Decreased Myocardial Fiber Number MP:0004567	2/11	0.00127	0.0852851	46.0486	307.086	CALR;CLU
MGI_Mammalian_Phenotype_Level_4_2024	Renal Glomerular Protein Deposits MP:0020518	2/12	0.00151913	0.0916645	41.4417	268.94	CLU;INS
MGI_Mammalian_Phenotype_Level_4_2024	Hepatic Steatosis MP:0002628	5/172	0.00158216	0.0916645	6.35342	40.973	LGALS3;GK;HNF4A;TLR5;INS
MGI_Mammalian_Phenotype_Level_4_2024	Hepatic Necrosis MP:0001654	3/48	0.00168164	0.0916645	13.9347	89.0149	SELP;CXCL12;PLG
MGI_Mammalian_Phenotype_Level_4_2024	Abnormal Leukocyte Migration MP:0003156	3/49	0.00178499	0.0916645	13.6311	86.2624	SELP;PPBP;TLR5
MGI_Mammalian_Phenotype_Level_4_2024	Decreased Platelet Aggregation MP:0009549	3/53	0.00223774	0.108483	12.5381	76.5111	VWF;ITGA2B;FGG
MGI_Mammalian_Phenotype_Level_4_2024	Abnormal Cell Adhesion MP:0003566	3/54	0.00236102	0.108483	12.2916	74.348	ITGA2B;PKP1;CALR
MGI_Mammalian_Phenotype_Level_4_2024	Sepsis MP:0005044	2/17	0.0030808	0.134477	27.6208	159.719	LGALS3;MPO
MGI_Mammalian_Phenotype_Level_4_2024	Abnormal Long Bone Epiphyseal Plate Morphology MP:0003055	3/66	0.00417521	0.17357	9.94436	54.4811	LGALS3;COL2A1;MATN1
MGI_Mammalian_Phenotype_Level_4_2024	Insulitis MP:0004031	2/22	0.00515015	0.195482	20.7104	109.118	AIRE;INS
MGI_Mammalian_Phenotype_Level_4_2024	Abnormal Platelet Activation MP:0006298	2/22	0.00515015	0.195482	20.7104	109.118	VWF;ITGA2B
MGI_Mammalian_Phenotype_Level_4_2024	Increased Susceptibility To Fungal Infection MP:0005399	2/23	0.00562273	0.204527	19.7232	102.185	AIRE;MPO
MGI_Mammalian_Phenotype_Level_4_2024	Abnormal Glomerular Capillary Morphology MP:0011320	2/25	0.006625	0.224132	18.0063	90.3361	CLU;INS
MGI_Mammalian_Phenotype_Level_4_2024	Abnormal Protein Level MP:0008469	2/26	0.00715431	0.224132	17.2552	85.2414	PON3;FN1
MGI_Mammalian_Phenotype_Level_4_2024	Abnormal Response To Transplant MP:0005671	2/26	0.00715431	0.224132	17.2552	85.2414	TLR5;INS
MGI_Mammalian_Phenotype_Level_4_2024	Decreased Susceptibility To Induced Thrombosis MP:0031120	2/27	0.00770215	0.224132	16.5642	80.6055	VWF;F2
MGI_Mammalian_Phenotype_Level_4_2024	Increased Aggression MP:0005655	2/27	0.00770215	0.224132	16.5642	80.6055	VAPB;CLU
MGI_Mammalian_Phenotype_Level_4_2024	Abnormal Stomach Mucosa Morphology MP:0010792	2/27	0.00770215	0.224132	16.5642	80.6055	AIRE;A4GNT
MGI_Mammalian_Phenotype_Level_4_2024	Abnormal Thrombosis MP:0005048	2/28	0.00826832	0.232847	15.9263	76.3717	FGG;PLG
MGI_Mammalian_Phenotype_Level_4_2024	Stomach Inflammation MP:0001873	2/30	0.00945492	0.245673	14.7872	68.9264	AIRE;A4GNT
MGI_Mammalian_Phenotype_Level_4_2024	Abnormal Cochlear Hair Cell Stereociliary Bundle Morphology MP:0004521	2/33	0.0113677	0.245673	13.3542	59.7864	GRXCR2;PTPRQ
MGI_Mammalian_Phenotype_Level_4_2024	Increased Circulating Ketone Body Level MP:0002575	2/34	0.0120399	0.245673	12.9362	57.1719	HNF4A;INS
MGI_Mammalian_Phenotype_Level_4_2024	Increased Monocyte Cell Number MP:0000220	4/183	0.0125783	0.245673	4.6887	20.5167	VCAM1;AIRE;MPO;RXFP2
MGI_Mammalian_Phenotype_Level_4_2024	Decreased Bone Strength MP:0004991	2/35	0.0127292	0.245673	12.5436	54.7383	LGALS3;ISG15
MGI_Mammalian_Phenotype_Level_4_2024	Abnormal Outer Hair Cell Stereociliary Bundle Morphology MP:0004527	2/36	0.0134354	0.245673	12.174	52.4683	GRXCR2;PTPRQ
MGI_Mammalian_Phenotype_Level_4_2024	Abnormal Neutrophil Physiology MP:0002463	3/101	0.0134477	0.245673	6.38153	27.4977	FGG;MPO;ELANE
MGI_Mammalian_Phenotype_Level_4_2024	Increased Tumor Necrosis Factor Secretion MP:0008560	3/102	0.0138069	0.245673	6.31675	27.052	LGALS3BP;LGALS3;AIRE
MGI_Mammalian_Phenotype_Level_4_2024	Impaired Wound Healing MP:0001792	2/37	0.0141583	0.245673	11.8256	50.3469	FN1;PLG
MGI_Mammalian_Phenotype_Level_4_2024	Abnormal Visceral Yolk Sac Morphology MP:0001718	3/106	0.0152979	0.245673	6.07021	25.3737	FGG;FN1;F2
MGI_Mammalian_Phenotype_Level_4_2024	Impaired Macrophage Chemotaxis MP:0003799	2/39	0.0156533	0.245673	11.1852	46.4979	SELP;LGALS3
MGI_Mammalian_Phenotype_Level_4_2024	Abnormal Extraembryonic Tissue Morphology MP:0002086	3/108	0.0160763	0.245673	5.95398	24.5924	VCAM1;HNF4A;FN1
MGI_Mammalian_Phenotype_Level_4_2024	Expanded Mesangial Matrix MP:0011353	2/40	0.0164252	0.245673	10.8904	44.7478	CLU;INS
MGI_Mammalian_Phenotype_Level_4_2024	Increased Susceptibility To Induced Morbidity/Mortality MP:0009763	4/199	0.0166284	0.245673	4.30049	17.6176	LGALS3;PON3;PLG;MPO
MGI_Mammalian_Phenotype_Level_4_2024	Weight Loss MP:0001263	4/200	0.0169055	0.245673	4.27833	17.4561	SELP;AIRE;PKP1;PLG
MGI_Mammalian_Phenotype_Level_4_2024	Lethality Throughout Fetal Growth And Development, Incomplete Penetrance MP:0011109	4/202	0.0174686	0.245673	4.23469	17.1393	PON3;CXCL12;CALR;F2
MGI_Mammalian_Phenotype_Level_4_2024	Decreased Width Of Hypertrophic Chondrocyte Zone MP:0003409	2/42	0.0180167	0.245673	10.3448	41.5494	LGALS3;COL2A1
MGI_Mammalian_Phenotype_Level_4_2024	Increased Circulating Cholesterol Level MP:0005178	5/313	0.0189545	0.245673	3.42026	13.5638	PON3;HNF4A;GFPT1;APOA1;TLR5
MGI_Mammalian_Phenotype_Level_4_2024	Increased Vascular Permeability MP:0003070	2/44	0.0196707	0.245673	9.85119	38.7016	SERPING1;INS
MGI_Mammalian_Phenotype_Level_4_2024	Abnormal Vascular Smooth Muscle Morphology MP:0005592	2/44	0.0196707	0.245673	9.85119	38.7016	CXCL12;FN1
MGI_Mammalian_Phenotype_Level_4_2024	Eye Hemorrhage MP:0006203	2/46	0.021386	0.245673	9.40246	36.1526	ADAMTS1;PLG
MGI_Mammalian_Phenotype_Level_4_2024	Hemorrhage MP:0001914	5/325	0.0218895	0.245673	3.28999	12.5735	SELP;ITGA2B;FGG;FN1;F2
MGI_Mammalian_Phenotype_Level_4_2024	Head Bobbing MP:0001410	2/48	0.0231611	0.245673	8.99275	33.8602	RBPJL;COL2A1
MGI_Mammalian_Phenotype_Level_4_2024	Decreased Circulating Triglyceride Level MP:0002644	4/222	0.0237473	0.245673	3.84228	14.3712	PON3;HNF4A;GC;INS
MGI_Mammalian_Phenotype_Level_4_2024	Oxidative Stress MP:0003674	3/127	0.0245706	0.245673	5.03684	18.6676	LGALS3;PON3;PON1
MGI_Mammalian_Phenotype_Level_4_2024	Decreased Trabecular Bone Volume MP:0010879	2/50	0.0249949	0.245673	8.61719	31.7895	COL2A1;ISG15
MGI_Mammalian_Phenotype_Level_4_2024	Liver Inflammation MP:0001860	3/128	0.025073	0.245673	4.99629	18.4162	LGALS3;PON3;AIRE
MGI_Mammalian_Phenotype_Level_4_2024	No Abnormal Phenotype Detected MP:0002169	16/1935	0.0256688	0.245673	1.82849	6.69682	RBPJL;AIRE;FN1;F2;GP5;ISX;INS;VTN;CXCL12;COL2A1;HNF4A;ALB;L1TD1;CDH15;ELANE;LTF
MGI_Mammalian_Phenotype_Level_4_2024	Abnormal Leukocyte Physiology MP:0002442	2/51	0.0259333	0.245673	8.4409	30.8281	LGALS3;PPBP
MGI_Mammalian_Phenotype_Level_4_2024	Abnormal Gastrulation MP:0001695	2/53	0.0278525	0.245673	8.10907	29.0372	HNF4A;FN1
MGI_Mammalian_Phenotype_Level_4_2024	Abnormal Long Bone Hypertrophic Chondrocyte Zone MP:0000165	2/53	0.0278525	0.245673	8.10907	29.0372	LGALS3;COL2A1
MGI_Mammalian_Phenotype_Level_4_2024	Distended Pericardium MP:0000292	2/53	0.0278525	0.245673	8.10907	29.0372	FN1;F2
MGI_Mammalian_Phenotype_Level_4_2024	Abnormal Metabolism MP:0005266	2/53	0.0278525	0.245673	8.10907	29.0372	IARS1;MPO
MGI_Mammalian_Phenotype_Level_4_2024	Abnormal Platelet Physiology MP:0005464	2/53	0.0278525	0.245673	8.10907	29.0372	VWF;ITGA2B
MGI_Mammalian_Phenotype_Level_4_2024	Increased Susceptibility To Experimental Autoimmune Encephalomyelitis MP:0004799	2/54	0.0288329	0.245673	7.95272	28.2022	VWF;MPO
MGI_Mammalian_Phenotype_Level_4_2024	Decreased Hematopoietic Stem Cell Number MP:0004810	2/54	0.0288329	0.245673	7.95272	28.2022	CXCL12;MATN4
MGI_Mammalian_Phenotype_Level_4_2024	Abnormal Acute Phase Protein Level MP:0010211	1/6	0.0290456	0.245673	41.0247	145.182	PLG
MGI_Mammalian_Phenotype_Level_4_2024	Increased White Fat Cell Lipid Droplet Size MP:0009121	1/6	0.0290456	0.245673	41.0247	145.182	PON3
MGI_Mammalian_Phenotype_Level_4_2024	Melena MP:0003292	1/6	0.0290456	0.245673	41.0247	145.182	VWF
MGI_Mammalian_Phenotype_Level_4_2024	Micromelia MP:0008736	1/6	0.0290456	0.245673	41.0247	145.182	COL2A1
MGI_Mammalian_Phenotype_Level_4_2024	Neuronal Cytoplasmic Inclusions MP:0011975	1/6	0.0290456	0.245673	41.0247	145.182	VAPB
MGI_Mammalian_Phenotype_Level_4_2024	Abnormal Ciliary Process Morphology MP:0014164	1/6	0.0290456	0.245673	41.0247	145.182	COL2A1
MGI_Mammalian_Phenotype_Level_4_2024	Poor Arterial Differentiation MP:0000262	1/6	0.0290456	0.245673	41.0247	145.182	CXCL12
MGI_Mammalian_Phenotype_Level_4_2024	Decreased Glutathione Level MP:0012604	1/6	0.0290456	0.245673	41.0247	145.182	PON3
MGI_Mammalian_Phenotype_Level_4_2024	Abnormal Hemostasis MP:0009676	1/6	0.0290456	0.245673	41.0247	145.182	ITGA2B
MGI_Mammalian_Phenotype_Level_4_2024	Uterine Hemorrhage MP:0004898	1/6	0.0290456	0.245673	41.0247	145.182	FGG
MGI_Mammalian_Phenotype_Level_4_2024	Venoocclusion MP:0006137	1/6	0.0290456	0.245673	41.0247	145.182	PLG
MGI_Mammalian_Phenotype_Level_4_2024	Abnormal Leukocyte Tethering Or Rolling MP:0003627	1/6	0.0290456	0.245673	41.0247	145.182	SELP
MGI_Mammalian_Phenotype_Level_4_2024	Abnormal Limb Long Bone Morphology MP:0011504	1/6	0.0290456	0.245673	41.0247	145.182	COL2A1
MGI_Mammalian_Phenotype_Level_4_2024	Dilated Kidney Calyx MP:0011305	1/6	0.0290456	0.245673	41.0247	145.182	ADAMTS1
MGI_Mammalian_Phenotype_Level_4_2024	Abnormal Outer Hair Cell Kinocilium Morphology MP:0011062	1/6	0.0290456	0.245673	41.0247	145.182	GRXCR2
MGI_Mammalian_Phenotype_Level_4_2024	Increased Chondrocyte Apoptosis MP:0014103	1/6	0.0290456	0.245673	41.0247	145.182	COL2A1
MGI_Mammalian_Phenotype_Level_4_2024	Increased Diameter Of Tibia MP:0008162	1/6	0.0290456	0.245673	41.0247	145.182	COL2A1
MGI_Mammalian_Phenotype_Level_4_2024	Polyphagia MP:0001433	2/56	0.0308347	0.245673	7.65741	26.641	TLR5;INS
MGI_Mammalian_Phenotype_Level_4_2024	Abnormal Digestive System Physiology MP:0001663	2/56	0.0308347	0.245673	7.65741	26.641	COL2A1;A4GNT
MGI_Mammalian_Phenotype_Level_4_2024	Decreased Tumor Growth/Size MP:0003447	2/56	0.0308347	0.245673	7.65741	26.641	CDA;PLG
MGI_Mammalian_Phenotype_Level_4_2024	Failure Of Chorioallantoic Fusion MP:0009657	2/56	0.0308347	0.245673	7.65741	26.641	VCAM1;FN1
MGI_Mammalian_Phenotype_Level_4_2024	Liver Fibrosis MP:0003333	2/58	0.0328901	0.245673	7.38318	25.2105	LGALS3;PLG
MGI_Mammalian_Phenotype_Level_4_2024	Absent Limb Buds MP:0004573	1/7	0.0338047	0.245673	34.1856	115.792	FN1
MGI_Mammalian_Phenotype_Level_4_2024	Increased Susceptibility To Infection Induced Morbidity/Mortality MP:0009787	1/7	0.0338047	0.245673	34.1856	115.792	ELANE
MGI_Mammalian_Phenotype_Level_4_2024	Abnormal Adrenal Medulla Morphology MP:0008289	1/7	0.0338047	0.245673	34.1856	115.792	ADAMTS1
MGI_Mammalian_Phenotype_Level_4_2024	Abnormal Atrioventricular Node Conduction MP:0006141	1/7	0.0338047	0.245673	34.1856	115.792	ASPH
MGI_Mammalian_Phenotype_Level_4_2024	Bilateral Cryptorchism MP:0031287	1/7	0.0338047	0.245673	34.1856	115.792	RXFP2
MGI_Mammalian_Phenotype_Level_4_2024	Abnormal Cellular Cholesterol Metabolism MP:0003191	1/7	0.0338047	0.245673	34.1856	115.792	APOA1
MGI_Mammalian_Phenotype_Level_4_2024	Prostate Gland Inflammation MP:0003608	1/7	0.0338047	0.245673	34.1856	115.792	AIRE
MGI_Mammalian_Phenotype_Level_4_2024	Short Lumbar Vertebrae MP:0004708	1/7	0.0338047	0.245673	34.1856	115.792	COL2A1
MGI_Mammalian_Phenotype_Level_4_2024	Thick Myocardium MP:0010656	1/7	0.0338047	0.245673	34.1856	115.792	FN1
MGI_Mammalian_Phenotype_Level_4_2024	Decreased Skeletal Muscle Triglyceride Level MP:0031414	1/7	0.0338047	0.245673	34.1856	115.792	INS
MGI_Mammalian_Phenotype_Level_4_2024	Abnormal Inhibitory Synapse Morphology MP:0020358	1/7	0.0338047	0.245673	34.1856	115.792	CLSTN2
MGI_Mammalian_Phenotype_Level_4_2024	Decreased Susceptibility To Fungal Infection MP:0005398	1/7	0.0338047	0.245673	34.1856	115.792	AIRE
MGI_Mammalian_Phenotype_Level_4_2024	Abnormal Mesangial Matrix Morphology MP:0011338	1/7	0.0338047	0.245673	34.1856	115.792	CLU
MGI_Mammalian_Phenotype_Level_4_2024	Abnormal Metallophilic Macrophage Morphology MP:0008241	1/7	0.0338047	0.245673	34.1856	115.792	AIRE
MGI_Mammalian_Phenotype_Level_4_2024	Abnormal Monocyte Morphology MP:0002620	1/7	0.0338047	0.245673	34.1856	115.792	LGALS3
MGI_Mammalian_Phenotype_Level_4_2024	Increased Activity Of Parathyroid MP:0003432	1/7	0.0338047	0.245673	34.1856	115.792	GC
MGI_Mammalian_Phenotype_Level_4_2024	Increased Diameter Of Humerus MP:0008160	1/7	0.0338047	0.245673	34.1856	115.792	COL2A1
MGI_Mammalian_Phenotype_Level_4_2024	Increased Ectoderm Apoptosis MP:0003895	1/7	0.0338047	0.245673	34.1856	115.792	HNF4A
MGI_Mammalian_Phenotype_Level_4_2024	Increased Pancreatic Islet Cell Apoptosis MP:0014121	1/7	0.0338047	0.245673	34.1856	115.792	INS
MGI_Mammalian_Phenotype_Level_4_2024	Increased Renal Glomerular Filtration Rate MP:0005527	1/7	0.0338047	0.245673	34.1856	115.792	INS
MGI_Mammalian_Phenotype_Level_4_2024	Abnormal Kidney Physiology MP:0002136	2/59	0.0339374	0.245673	7.25329	24.5396	LGALS3;HPX
MGI_Mammalian_Phenotype_Level_4_2024	Lung Inflammation MP:0001861	3/149	0.0368959	0.245673	4.27311	14.0998	LGALS3;AIRE;TLR5
MGI_Mammalian_Phenotype_Level_4_2024	Increased Cell Proliferation MP:0000351	2/63	0.0382547	0.245673	6.7763	22.1144	A4GNT;LTF
MGI_Mammalian_Phenotype_Level_4_2024	Absent Intervertebral Disk MP:0004683	1/8	0.0385407	0.245673	29.3004	95.4034	COL2A1
MGI_Mammalian_Phenotype_Level_4_2024	Absent Pancreatic Beta Cells MP:0009174	1/8	0.0385407	0.245673	29.3004	95.4034	INS
MGI_Mammalian_Phenotype_Level_4_2024	Intestinal Hemorrhage MP:0031154	1/8	0.0385407	0.245673	29.3004	95.4034	F2
MGI_Mammalian_Phenotype_Level_4_2024	Atherosclerotic Lesions MP:0005338	1/8	0.0385407	0.245673	29.3004	95.4034	MPO
MGI_Mammalian_Phenotype_Level_4_2024	Abnormal Corneocyte Morphology MP:0030605	1/8	0.0385407	0.245673	29.3004	95.4034	PKP1
MGI_Mammalian_Phenotype_Level_4_2024	Prominent Forehead MP:0030049	1/8	0.0385407	0.245673	29.3004	95.4034	COL2A1
MGI_Mammalian_Phenotype_Level_4_2024	Decreased Cholesterol Efflux MP:0003193	1/8	0.0385407	0.245673	29.3004	95.4034	APOA1
MGI_Mammalian_Phenotype_Level_4_2024	Stomach Epithelial Hyperplasia MP:0005493	1/8	0.0385407	0.245673	29.3004	95.4034	A4GNT
MGI_Mammalian_Phenotype_Level_4_2024	Ureter Obstruction MP:0003587	1/8	0.0385407	0.245673	29.3004	95.4034	ADAMTS1
MGI_Mammalian_Phenotype_Level_4_2024	Dilated Allantois MP:0004557	1/8	0.0385407	0.245673	29.3004	95.4034	VCAM1
MGI_Mammalian_Phenotype_Level_4_2024	Abnormal Skin Vasculature Morphology MP:0014273	1/8	0.0385407	0.245673	29.3004	95.4034	CXCL12
MGI_Mammalian_Phenotype_Level_4_2024	Increased Hematopoietic Stem Cell Proliferation MP:0011902	1/8	0.0385407	0.245673	29.3004	95.4034	MATN4
MGI_Mammalian_Phenotype_Level_4_2024	Increased Macrophage Apoptosis MP:0011080	1/8	0.0385407	0.245673	29.3004	95.4034	LGALS3
MGI_Mammalian_Phenotype_Level_4_2024	Increased Miscarriage Rate MP:0031434	1/8	0.0385407	0.245673	29.3004	95.4034	FGG
MGI_Mammalian_Phenotype_Level_4_2024	Increased Body Weight MP:0001260	4/260	0.0390518	0.245673	3.26562	10.59	LGALS3;PON3;COL2A1;TLR5
MGI_Mammalian_Phenotype_Level_4_2024	Abnormal Lens Morphology MP:0001303	4/263	0.0404529	0.245673	3.22731	10.352	COL2A1;C7;GFPT2;HNF4A
MGI_Mammalian_Phenotype_Level_4_2024	Skin Lesions MP:0001212	2/66	0.0416227	0.245673	6.45768	20.5297	FN1;PKP1
MGI_Mammalian_Phenotype_Level_4_2024	Abnormal Head Morphology MP:0000432	2/66	0.0416227	0.245673	6.45768	20.5297	COL2A1;C7
MGI_Mammalian_Phenotype_Level_4_2024	Increased Susceptibility To Diet-Induced Obesity MP:0005658	2/67	0.0427694	0.245673	6.35801	20.04	PON3;TLR5
MGI_Mammalian_Phenotype_Level_4_2024	Decreased Circulating Cholesterol Level MP:0005179	4/268	0.0428513	0.245673	3.16538	9.971	HNF4A;APOA1;GC;GPLD1
MGI_Mammalian_Phenotype_Level_4_2024	Absent Nasal Septum MP:0004872	1/9	0.0432537	0.245673	25.6366	80.5162	COL2A1
MGI_Mammalian_Phenotype_Level_4_2024	Abnormal Chest Morphology MP:0004134	1/9	0.0432537	0.245673	25.6366	80.5162	COL2A1
MGI_Mammalian_Phenotype_Level_4_2024	Proboscis MP:0006290	1/9	0.0432537	0.245673	25.6366	80.5162	COL2A1
MGI_Mammalian_Phenotype_Level_4_2024	Abnormal Epicardium Morphology MP:0003057	1/9	0.0432537	0.245673	25.6366	80.5162	VCAM1
MGI_Mammalian_Phenotype_Level_4_2024	Small Visceral Yolk Sac MP:0012131	1/9	0.0432537	0.245673	25.6366	80.5162	HNF4A
MGI_Mammalian_Phenotype_Level_4_2024	Decreased Susceptibility To Induced Choroidal Neovascularization MP:0003434	1/9	0.0432537	0.245673	25.6366	80.5162	PLG
MGI_Mammalian_Phenotype_Level_4_2024	Decreased Tear Production MP:0020220	1/9	0.0432537	0.245673	25.6366	80.5162	AIRE
MGI_Mammalian_Phenotype_Level_4_2024	Abnormal Lateral Plate Mesoderm Morphology MP:0010117	1/9	0.0432537	0.245673	25.6366	80.5162	FN1
MGI_Mammalian_Phenotype_Level_4_2024	Abnormal Long Bone Epiphyseal Ossification Zone Morphology MP:0006399	1/9	0.0432537	0.245673	25.6366	80.5162	COL2A1
MGI_Mammalian_Phenotype_Level_4_2024	Dilated Uterus MP:0001123	1/9	0.0432537	0.245673	25.6366	80.5162	ADAMTS1
MGI_Mammalian_Phenotype_Level_4_2024	Elevated Level Of Mitotic Sister Chromatid Exchange MP:0003701	1/9	0.0432537	0.245673	25.6366	80.5162	CDA
MGI_Mammalian_Phenotype_Level_4_2024	Enophthalmos MP:0006198	1/9	0.0432537	0.245673	25.6366	80.5162	COL2A1
MGI_Mammalian_Phenotype_Level_4_2024	Abnormal Posterior Eye Segment Morphology MP:0005195	1/9	0.0432537	0.245673	25.6366	80.5162	COL2A1
MGI_Mammalian_Phenotype_Level_4_2024	Abnormal Rostral-Caudal Patterning Of The Somites MP:0008530	1/9	0.0432537	0.245673	25.6366	80.5162	FN1
MGI_Mammalian_Phenotype_Level_4_2024	Increased Bone Mineralization MP:0020080	1/9	0.0432537	0.245673	25.6366	80.5162	GFRA4
MGI_Mammalian_Phenotype_Level_4_2024	Abnormal Thyroid Gland Physiology MP:0002876	1/9	0.0432537	0.245673	25.6366	80.5162	GFRA4
MGI_Mammalian_Phenotype_Level_4_2024	Increased Leukocyte Cell Number MP:0000218	4/269	0.0433405	0.245673	3.15327	9.89707	SELP;VCAM1;FGG;INS
MGI_Mammalian_Phenotype_Level_4_2024	Increased IgG Level MP:0002493	2/68	0.0439279	0.245673	6.26136	19.5681	SELP;LGALS3
MGI_Mammalian_Phenotype_Level_4_2024	Increased Circulating LDL Cholesterol Level MP:0000182	2/70	0.0462795	0.245673	6.07659	18.6737	PON3;PON1
MGI_Mammalian_Phenotype_Level_4_2024	Increased Susceptibility To Induced Pancreatitis MP:0004761	1/10	0.0479439	0.245673	22.7869	69.2204	TLR5
MGI_Mammalian_Phenotype_Level_4_2024	Abnormal Sertoli Cell Development MP:0004109	1/10	0.0479439	0.245673	22.7869	69.2204	LGALS3
MGI_Mammalian_Phenotype_Level_4_2024	Kidney Medulla Atrophy MP:0011422	1/10	0.0479439	0.245673	22.7869	69.2204	ADAMTS1
MGI_Mammalian_Phenotype_Level_4_2024	Premaxilla Hypoplasia MP:0004871	1/10	0.0479439	0.245673	22.7869	69.2204	COL2A1
MGI_Mammalian_Phenotype_Level_4_2024	Renal Glomerulus Fibrosis MP:0011377	1/10	0.0479439	0.245673	22.7869	69.2204	CLU
MGI_Mammalian_Phenotype_Level_4_2024	Abnormal Extracellular Matrix Morphology MP:0013258	1/10	0.0479439	0.245673	22.7869	69.2204	FN1
MGI_Mammalian_Phenotype_Level_4_2024	Decreased Pancreatic Alpha Cell Number MP:0009177	1/10	0.0479439	0.245673	22.7869	69.2204	INS
MGI_Mammalian_Phenotype_Level_4_2024	Uterus Cyst MP:0009082	1/10	0.0479439	0.245673	22.7869	69.2204	ADAMTS1
MGI_Mammalian_Phenotype_Level_4_2024	Abnormal Kidney Corticomedullary Boundary Morphology MP:0011376	1/10	0.0479439	0.245673	22.7869	69.2204	ADAMTS1
MGI_Mammalian_Phenotype_Level_4_2024	Abnormal Kidney Interstitium Morphology MP:0011425	1/10	0.0479439	0.245673	22.7869	69.2204	INS
MGI_Mammalian_Phenotype_Level_4_2024	Abnormal Larynx Morphology MP:0002249	1/10	0.0479439	0.245673	22.7869	69.2204	PLG
MGI_Mammalian_Phenotype_Level_4_2024	Decreased Urine Chloride Ion Level MP:0011460	1/10	0.0479439	0.245673	22.7869	69.2204	ADAMTS1
MGI_Mammalian_Phenotype_Level_4_2024	Gallstones MP:0002830	1/10	0.0479439	0.245673	22.7869	69.2204	PON3
MGI_Mammalian_Phenotype_Level_4_2024	Hemoperitoneum MP:0005435	1/10	0.0479439	0.245673	22.7869	69.2204	FGG
MGI_Mammalian_Phenotype_Level_4_2024	Abnormal Pituitary Secretion MP:0001746	1/10	0.0479439	0.245673	22.7869	69.2204	GK
MGI_Mammalian_Phenotype_Level_4_2024	Impaired Short-Term Object Recognition Memory MP:0014365	1/10	0.0479439	0.245673	22.7869	69.2204	ASNS
MGI_Mammalian_Phenotype_Level_4_2024	Increased Cardiac Muscle Glycogen Level MP:0014071	1/10	0.0479439	0.245673	22.7869	69.2204	CALR
MGI_Mammalian_Phenotype_Level_4_2024	Increased Compact Bone Volume MP:0010964	1/10	0.0479439	0.245673	22.7869	69.2204	LGALS3
MGI_Mammalian_Phenotype_Level_4_2024	Abnormal Thymus Physiology MP:0003763	1/10	0.0479439	0.245673	22.7869	69.2204	AIRE

## Sheet: ML_DEG&PPI
Data base	Term	Overlap	P.value	Adjusted.P.value	Odds.Ratio	Combined.Score	Genes
KEGG_2021_Human	Complement and coagulation cascades	6/85	5.19652e-07	6.91137e-05	23.5574	340.877	VTN;VWF;PLG;F2;A2M;CLU
KEGG_2021_Human	Proteoglycans in cancer	7/205	7.44514e-06	0.000495102	11.073	130.749	COL1A1;VTN;CTTN;MMP2;FN1;MSN;MMP9
KEGG_2021_Human	ECM-receptor interaction	5/88	1.42068e-05	0.000629834	18.3939	205.309	COL1A1;VTN;VWF;COL6A1;FN1
KEGG_2021_Human	Neomycin, kanamycin and gentamicin biosynthesis	2/5	0.000119932	0.00398775	195.363	1763.85	HK3;HK1
KEGG_2021_Human	Human papillomavirus infection	7/331	0.00015656	0.00416449	6.72359	58.9126	COL1A1;VTN;VWF;IFNA2;COL6A1;FN1;ATP6V1C2
KEGG_2021_Human	Ferroptosis	3/41	0.00039788	0.00881967	23.4391	183.513	TFRC;GSS;GCLM
KEGG_2021_Human	Focal adhesion	5/201	0.000695214	0.0118914	7.7449	56.3154	COL1A1;VTN;VWF;COL6A1;FN1
KEGG_2021_Human	Cysteine and methionine metabolism	3/50	0.000715274	0.0118914	18.9422	137.195	PSAT1;GSS;GCLM
KEGG_2021_Human	Platelet activation	4/124	0.000940996	0.0139058	10.0051	69.7209	COL1A1;PLA2G4F;VWF;F2
KEGG_2021_Human	Coronavirus disease	5/232	0.00131918	0.0165223	6.67672	44.2717	VWF;RPL31;IFNA2;RPL11;F2
KEGG_2021_Human	Lysine degradation	3/63	0.00140289	0.0165223	14.8284	97.4108	PIPOX;PLOD2;COLGALT1
KEGG_2021_Human	PI3K-Akt signaling pathway	6/354	0.00149074	0.0165223	5.27532	34.3344	COL1A1;VTN;VWF;IFNA2;COL6A1;FN1
KEGG_2021_Human	AGE-RAGE signaling pathway in diabetic complications	3/100	0.00520972	0.0494115	9.1551	48.1305	COL1A1;MMP2;FN1
KEGG_2021_Human	Galactose metabolism	2/31	0.00525863	0.0494115	20.1836	105.921	HK3;HK1
KEGG_2021_Human	Diabetic cardiomyopathy	4/203	0.00560493	0.0494115	6.00914	31.152	COL1A1;ATP8;MMP2;MMP9
KEGG_2021_Human	Fructose and mannose metabolism	2/33	0.00594424	0.0494115	18.8795	96.7637	HK3;HK1
KEGG_2021_Human	HIF-1 signaling pathway	3/109	0.00661435	0.0497614	8.37398	42.0249	HK3;TFRC;HK1
KEGG_2021_Human	Starch and sucrose metabolism	2/36	0.00704483	0.0497614	17.2111	85.2888	HK3;HK1
KEGG_2021_Human	African trypanosomiasis	2/37	0.00743065	0.0497614	16.7185	81.9564	HBB;APOA1
KEGG_2021_Human	Leukocyte transendothelial migration	3/114	0.00748291	0.0497614	7.99476	39.1354	MMP2;MSN;MMP9
KEGG_2021_Human	Glycine, serine and threonine metabolism	2/40	0.00864405	0.0547457	15.3963	73.146	PSAT1;PIPOX
KEGG_2021_Human	Bladder cancer	2/41	0.00906693	0.0548137	15.0008	70.5504	MMP2;MMP9
KEGG_2021_Human	Relaxin signaling pathway	3/129	0.0104796	0.0605995	7.03767	32.08	COL1A1;MMP2;MMP9
KEGG_2021_Human	Type II diabetes mellitus	2/46	0.0113164	0.0607066	13.2928	59.5716	HK3;HK1
KEGG_2021_Human	Carbohydrate digestion and absorption	2/47	0.0117929	0.0607066	12.9967	57.7088	HK3;HK1
KEGG_2021_Human	Amino sugar and nucleotide sugar metabolism	2/48	0.0122781	0.0607066	12.7136	55.9389	HK3;HK1
KEGG_2021_Human	Insulin signaling pathway	3/137	0.0123239	0.0607066	6.61484	29.0802	LIPE;HK3;HK1
KEGG_2021_Human	Phagosome	3/152	0.0162552	0.0772123	5.94441	24.487	TFRC;CALR;ATP6V1C2
KEGG_2021_Human	Glutathione metabolism	2/57	0.0170253	0.0780815	10.6283	43.2898	GSS;GCLM
KEGG_2021_Human	Vitamin B6 metabolism	1/6	0.0208195	0.0922999	57.7536	223.614	PSAT1
KEGG_2021_Human	Glycolysis / Gluconeogenesis	2/67	0.0230644	0.0989538	8.98869	33.8825	HK3;HK1
KEGG_2021_Human	Central carbon metabolism in cancer	2/70	0.0250244	0.104008	8.59083	31.6822	HK3;HK1
KEGG_2021_Human	Bacterial invasion of epithelial cells	2/77	0.0298501	0.120305	7.78627	27.342	CTTN;FN1
KEGG_2021_Human	Pathogenic Escherichia coli infection	3/197	0.0318299	0.124511	4.55516	15.7032	MYO1B;CTTN;F2
KEGG_2021_Human	Pathways in cancer	5/531	0.0382777	0.145455	2.83767	9.259	MMP2;IFNA2;FN1;F2;MMP9
KEGG_2021_Human	Lipid and atherosclerosis	3/215	0.0396464	0.146432	4.1646	13.4423	IFNA2;APOA1;MMP9
KEGG_2021_Human	Regulation of actin cytoskeleton	3/218	0.0410357	0.146432	4.10587	13.1113	FN1;MSN;F2
KEGG_2021_Human	GnRH signaling pathway	2/93	0.0421185	0.146432	6.41209	20.3088	PLA2G4F;MMP2
KEGG_2021_Human	IL-17 signaling pathway	2/94	0.0429388	0.146432	6.34207	19.9647	LCN2;MMP9
KEGG_2021_Human	Amoebiasis	2/102	0.0497128	0.164094	5.83235	17.5058	COL1A1;FN1
Reactome_Pathways_2024	Extracellular Matrix Organization	12/300	5.10063e-10	1.76992e-07	14.1106	301.918	ADAMTS4;COL1A1;VTN;VWF;MMP2;COL6A1;FN1;PLOD2;PLG;A2M;COLGALT1;MMP9
Reactome_Pathways_2024	Degradation of the Extracellular Matrix	8/140	3.08685e-08	5.35569e-06	19.3529	334.68	ADAMTS4;COL1A1;MMP2;COL6A1;FN1;PLG;A2M;MMP9
Reactome_Pathways_2024	Immune System	24/2150	1.27057e-07	1.46963e-05	4.36926	69.3778	FCN1;IGKV2D-30;MMP2;IFNA2;HP;FN1;HBB;MSN;F2;CLU;MMP9;LILRB5;IL22RA2;COL1A1;LGALS3;HK3;VTN;LCN2;STOM;CPNE3;PTX3;CALR;PGLYRP1;ATP6V1C2
Reactome_Pathways_2024	Innate Immune System	17/1149	3.12533e-07	1.85513e-05	5.32646	79.7826	FCN1;IGKV2D-30;IFNA2;HP;HBB;F2;CLU;MMP9;LGALS3;HK3;VTN;LCN2;STOM;CPNE3;PTX3;PGLYRP1;ATP6V1C2
Reactome_Pathways_2024	Platelet Degranulation	7/128	3.19765e-07	1.85513e-05	18.1901	272.045	POTEKP;VWF;FN1;APOA1;PLG;A2M;CLU
Reactome_Pathways_2024	Platelet Activation, Signaling and Aggregation	9/262	3.20771e-07	1.85513e-05	11.475	171.58	COL1A1;POTEKP;VWF;FN1;APOA1;PLG;F2;A2M;CLU
Reactome_Pathways_2024	Response to Elevated Platelet Cytosolic Ca2+	7/133	4.1505e-07	2.05746e-05	17.4638	256.629	POTEKP;VWF;FN1;APOA1;PLG;A2M;CLU
Reactome_Pathways_2024	Neutrophil Degranulation	11/478	7.86311e-07	3.41063e-05	7.77022	109.218	FCN1;LGALS3;HK3;HP;LCN2;HBB;STOM;CPNE3;PTX3;PGLYRP1;MMP9
Reactome_Pathways_2024	Hemostasis	13/707	8.92848e-07	3.44243e-05	6.32155	88.052	VWF;IGKV2D-30;IFNA2;FN1;HBB;APOA1;PLG;F2;CLU;SPN;COL1A1;POTEKP;A2M
Reactome_Pathways_2024	Binding and Uptake of Ligands by Scavenger Receptors	6/122	4.33929e-06	0.000150573	16.0135	197.731	COL1A1;IGKV2D-30;HP;HBB;APOA1;CALR
Reactome_Pathways_2024	Platelet Aggregation (Plug Formation)	4/39	1.0316e-05	0.000325423	34.4502	395.551	COL1A1;VWF;FN1;F2
Reactome_Pathways_2024	Integrin Cell Surface Interactions	5/85	1.19921e-05	0.000346771	19.0865	216.275	COL1A1;VTN;VWF;COL6A1;FN1
Reactome_Pathways_2024	Collagen Formation	5/90	1.58519e-05	0.000423124	17.9593	198.49	COL1A1;COL6A1;PLOD2;COLGALT1;MMP9
Reactome_Pathways_2024	Scavenging by Class A Receptors	3/19	3.82179e-05	0.000884107	55.7295	566.892	COL1A1;APOA1;CALR
Reactome_Pathways_2024	Diseases of Hemostasis	3/19	3.82179e-05	0.000884107	55.7295	566.892	COL1A1;VWF;F2
Reactome_Pathways_2024	Intrinsic Pathway of Fibrin Clot Formation	3/23	6.91517e-05	0.00143832	44.5746	426.99	VWF;F2;A2M
Reactome_Pathways_2024	Regulation of IGF Transport and Uptake by Insulin-like Growth Factor Binding Proteins (IGFBPs)	5/124	7.40809e-05	0.00143832	12.8061	121.79	MMP2;FN1;APOA1;PLG;F2
Reactome_Pathways_2024	Collagen Degradation	4/64	7.46103e-05	0.00143832	20.0707	190.737	COL1A1;MMP2;COL6A1;MMP9
Reactome_Pathways_2024	Collagen Biosynthesis and Modifying Enzymes	4/67	8.92975e-05	0.00163085	19.1121	178.192	COL1A1;COL6A1;PLOD2;COLGALT1
Reactome_Pathways_2024	Syndecan Interactions	3/27	0.000113072	0.00196179	37.1381	337.492	COL1A1;VTN;FN1
Reactome_Pathways_2024	Complement Cascade	5/139	0.000127045	0.00209926	11.3639	101.946	FCN1;VTN;IGKV2D-30;F2;CLU
Reactome_Pathways_2024	ECM Proteoglycans	4/76	0.000145973	0.0023024	16.7155	147.633	COL1A1;VTN;COL6A1;FN1
Reactome_Pathways_2024	Activation of Matrix Metalloproteinases	3/33	0.000207764	0.00313453	29.7015	251.842	MMP2;PLG;MMP9
Reactome_Pathways_2024	Enhanced Binding of GP1BA Variant to VWF Multimer Collagen	2/7	0.000250719	0.00334614	117.206	971.775	COL1A1;VWF
Reactome_Pathways_2024	Defective Binding of VWF Variant to GPIb IX V	2/7	0.000250719	0.00334614	117.206	971.775	COL1A1;VWF
Reactome_Pathways_2024	Defective Factor VIII Causes Hemophilia A	2/7	0.000250719	0.00334614	117.206	971.775	VWF;F2
Reactome_Pathways_2024	Scavenging of Heme From Plasma	4/92	0.000304818	0.00391748	13.6653	110.631	IGKV2D-30;HP;HBB;APOA1
Reactome_Pathways_2024	HDL Assembly	2/8	0.000333537	0.0039653	97.6667	781.896	APOA1;A2M
Reactome_Pathways_2024	Defects of Platelet Adhesion to Exposed Collagen	2/8	0.000333537	0.0039653	97.6667	781.896	COL1A1;VWF
Reactome_Pathways_2024	Formation of Fibrin Clot (Clotting Cascade)	3/39	0.000342822	0.0039653	24.7438	197.413	VWF;A2M;F2
Reactome_Pathways_2024	Interleukin-4 and Interleukin-13 Signaling	4/112	0.000642894	0.00719626	11.1235	81.7522	MMP2;FN1;LCN2;MMP9
Reactome_Pathways_2024	GP1b-IX-V Activation Signalling	2/12	0.000779106	0.00844843	58.5882	419.337	COL1A1;VWF
Reactome_Pathways_2024	Glutathione Synthesis and Recycling	2/13	0.000918681	0.00966007	53.2594	372.42	GSS;GCLM
Reactome_Pathways_2024	Regulation of Complement Cascade	4/128	0.00105891	0.0108071	9.68035	66.3154	VTN;IGKV2D-30;F2;CLU
Reactome_Pathways_2024	Metabolism	17/2181	0.00113404	0.0108788	2.63333	17.8592	PLA2G4F;GLYATL2;RPL31;GSS;PON1;RPL11;PIPOX;APOA1;ASNS;HK1;LIPE;HK3;PSAT1;CPNE3;GC;GCLM;CES1
Reactome_Pathways_2024	Non-integrin membrane-ECM Interactions	3/59	0.00115999	0.0108788	15.8907	107.411	COL1A1;VTN;FN1
Reactome_Pathways_2024	Iron Uptake and Transport	3/59	0.00115999	0.0108788	15.8907	107.411	TFRC;LCN2;ATP6V1C2
Reactome_Pathways_2024	p130Cas Linkage to MAPK Signaling for Integrins	2/15	0.0012311	0.0109537	45.0611	301.902	VWF;FN1
Reactome_Pathways_2024	GRB2 SOS Provides Linkage to MAPK Signaling for Integrins	2/15	0.0012311	0.0109537	45.0611	301.902	VWF;FN1
Reactome_Pathways_2024	Assembly of Collagen Fibrils and Other Multimeric Structures	3/61	0.0012778	0.0110849	15.3412	102.213	COL1A1;COL6A1;MMP9
Reactome_Pathways_2024	Cell Surface Interactions at the Vascular Wall	5/233	0.00134449	0.0113283	6.6471	43.9489	SPN;COL1A1;IGKV2D-30;FN1;F2
Reactome_Pathways_2024	Platelet Adhesion to Exposed Collagen	2/16	0.0014038	0.0113283	41.8403	274.831	COL1A1;VWF
Reactome_Pathways_2024	Defects of Contact Activation System (CAS) and Kallikrein Kinin System (KKS)	2/16	0.0014038	0.0113283	41.8403	274.831	VWF;F2
Reactome_Pathways_2024	Plasma Lipoprotein Assembly	2/19	0.00198689	0.0156694	34.4516	214.329	APOA1;A2M
Reactome_Pathways_2024	Cellular Response to Starvation	4/161	0.0024551	0.0189316	7.63289	45.8705	RPL31;RPL11;ASNS;ATP6V1C2
Reactome_Pathways_2024	Axon Guidance	7/541	0.00280503	0.0211597	4.03579	23.7157	RPL31;MMP2;COL6A1;RPL11;MSN;MMP9;GFRA4
Reactome_Pathways_2024	Nervous System Development	7/567	0.00363395	0.02648	3.84325	21.5892	RPL31;MMP2;COL6A1;RPL11;MSN;MMP9;GFRA4
Reactome_Pathways_2024	Cellular Responses to Stimuli	9/887	0.00366294	0.02648	3.20154	17.959	RPL31;RPL11;FN1;HBB;APOA1;ASNS;CALR;GCLM;ATP6V1C2
Reactome_Pathways_2024	Integrin Signaling	2/27	0.00400537	0.0283645	23.4176	129.268	VWF;FN1
Reactome_Pathways_2024	Antimicrobial Peptides	3/95	0.00451525	0.0313359	9.65509	52.1403	LCN2;PGLYRP1;CLU
Reactome_Pathways_2024	Vesicle-mediated Transport	8/752	0.00464863	0.0316289	3.32744	17.8723	COL1A1;TFRC;CTTN;IGKV2D-30;HP;HBB;APOA1;CALR
Reactome_Pathways_2024	MET Activates PTK2 Signaling	2/30	0.00493046	0.0326878	20.9055	111.057	COL1A1;FN1
Reactome_Pathways_2024	Signaling by Interleukins	6/452	0.00499267	0.0326878	4.09557	21.7057	MMP2;FN1;LCN2;MSN;MMP9;IL22RA2
Reactome_Pathways_2024	Transferrin Endocytosis and Recycling	2/31	0.00525863	0.0337915	20.1836	105.921	TFRC;ATP6V1C2
Reactome_Pathways_2024	Cellular Responses to Stress	8/787	0.00608281	0.0375677	3.17214	16.1852	RPL31;RPL11;HBB;APOA1;ASNS;CALR;GCLM;ATP6V1C2
Reactome_Pathways_2024	Response of EIF2AK4 (GCN2) to Amino Acid Deficiency	3/106	0.0061237	0.0375677	8.61919	43.9198	RPL31;RPL11;ASNS
Reactome_Pathways_2024	Disease	15/2131	0.00617106	0.0375677	2.29601	11.6818	VWF;IGKV2D-30;RPL31;GSS;IFNA2;RPL11;FN1;APOA1;MSN;F2;HK1;ADAMTS4;COL1A1;CALR;GCLM
Reactome_Pathways_2024	Metabolic Disorders of Biological Oxidation Enzymes	2/34	0.00630156	0.0377007	18.2886	92.6676	GSS;GCLM
Reactome_Pathways_2024	Drug ADME	3/109	0.00661435	0.0389013	8.37398	42.0249	GLYATL2;PON1;CES1
Reactome_Pathways_2024	Phase II - Conjugation of Compounds	3/111	0.00695411	0.0400747	8.21808	40.8309	GLYATL2;GSS;GCLM
Reactome_Pathways_2024	Signaling by High-Kinase Activity BRAF Mutants	2/36	0.00704483	0.0400747	17.2111	85.2888	VWF;FN1
Reactome_Pathways_2024	Molecules Associated With Elastic Fibres	2/37	0.00743065	0.0402881	16.7185	81.9564	VTN;FN1
Reactome_Pathways_2024	Glutathione Conjugation	2/37	0.00743065	0.0402881	16.7185	81.9564	GSS;GCLM
Reactome_Pathways_2024	RHOH GTPase Cycle	2/37	0.00743065	0.0402881	16.7185	81.9564	TFRC;STOM
Reactome_Pathways_2024	Biological Oxidations	4/222	0.0076497	0.0408376	5.48012	26.7051	GLYATL2;GSS;GCLM;CES1
Reactome_Pathways_2024	Metabolism of Amino Acids and Derivatives	5/358	0.00836322	0.0439703	4.26607	20.4085	RPL31;PSAT1;RPL11;PIPOX;ASNS
Reactome_Pathways_2024	MAP2K and MAPK Activation	2/40	0.00864405	0.0447684	15.3963	73.146	VWF;FN1
Reactome_Pathways_2024	Signaling by RAF1 Mutants	2/41	0.00906693	0.0455975	15.0008	70.5504	VWF;FN1
Reactome_Pathways_2024	MET Promotes Cell Motility	2/41	0.00906693	0.0455975	15.0008	70.5504	COL1A1;FN1
Reactome_Pathways_2024	NCAM1 Interactions	2/42	0.00949891	0.0470875	14.625	68.1025	COL6A1;GFRA4
Reactome_Pathways_2024	Aspirin ADME	2/43	0.00993992	0.0485796	14.2676	65.7906	GLYATL2;CES1
Reactome_Pathways_2024	Elastic Fibre Formation	2/44	0.0103899	0.0488898	13.9272	63.6043	VTN;FN1
Reactome_Pathways_2024	Collagen Chain Trimerization	2/44	0.0103899	0.0488898	13.9272	63.6043	COL1A1;COL6A1
Reactome_Pathways_2024	Paradoxical Activation of RAF Signaling by Kinase Inactive BRAF	2/45	0.0108487	0.0488898	13.6026	61.5342	VWF;FN1
Reactome_Pathways_2024	Signaling by RAS Mutants	2/45	0.0108487	0.0488898	13.6026	61.5342	VWF;FN1
Reactome_Pathways_2024	Signaling by Moderate Kinase Activity BRAF Mutants	2/45	0.0108487	0.0488898	13.6026	61.5342	VWF;FN1
Reactome_Pathways_2024	Signaling Downstream of RAS Mutants	2/45	0.0108487	0.0488898	13.6026	61.5342	VWF;FN1
Reactome_Pathways_2024	Signaling by Receptor Tyrosine Kinases	6/536	0.0111103	0.0494265	3.4316	15.4418	COL1A1;COL6A1;FN1;PLG;MMP9;ATP6V1C2
Reactome_Pathways_2024	Heme Signaling	2/47	0.0117929	0.0517992	12.9967	57.7088	HBB;APOA1
Reactome_Pathways_2024	Transport of Small Molecules	7/724	0.0131796	0.0571667	2.97737	12.8893	TFRC;LCN2;HBB;APOA1;STOM;A2M;ATP6V1C2
Reactome_Pathways_2024	EPH-ephrin Mediated Repulsion of Cells	2/51	0.0137851	0.0590545	11.9334	51.1246	MMP2;MMP9
Reactome_Pathways_2024	RHOJ GTPase Cycle	2/55	0.0159123	0.0673362	11.0305	45.6737	TFRC;STOM
Reactome_Pathways_2024	Ficolins Bind to Repetitive Carbohydrate Structures on the Target Cell Surface	1/5	0.0173795	0.0717939	72.1957	292.57	FCN1
Reactome_Pathways_2024	HDL Clearance	1/5	0.0173795	0.0717939	72.1957	292.57	APOA1
Reactome_Pathways_2024	Signaling by PDGF	2/58	0.0175939	0.0718246	10.438	42.1717	COL6A1;PLG
Reactome_Pathways_2024	RHOQ GTPase Cycle	2/59	0.0181706	0.0733161	10.2544	41.0991	TFRC;STOM
Reactome_Pathways_2024	Cytokine Signaling in Immune System	7/776	0.0186127	0.0742367	2.76853	11.0296	MMP2;IFNA2;FN1;LCN2;MSN;MMP9;IL22RA2
Reactome_Pathways_2024	NCAM Signaling for Neurite Out-Growth	2/63	0.0205559	0.0768551	9.58004	37.2147	COL6A1;GFRA4
Reactome_Pathways_2024	Fibronectin Matrix Formation	1/6	0.0208195	0.0768551	57.7536	223.614	FN1
Reactome_Pathways_2024	Scavenging by Class B Receptors	1/6	0.0208195	0.0768551	57.7536	223.614	APOA1
Reactome_Pathways_2024	Assembly of Viral Components at the Budding Site	1/6	0.0208195	0.0768551	57.7536	223.614	CALR
Reactome_Pathways_2024	Synthesis of GDP-mannose	1/6	0.0208195	0.0768551	57.7536	223.614	HK1
Reactome_Pathways_2024	Conjugation of Benzoate With Glycine	1/6	0.0208195	0.0768551	57.7536	223.614	GLYATL2
Reactome_Pathways_2024	Metal Sequestration by Antimicrobial Proteins	1/6	0.0208195	0.0768551	57.7536	223.614	LCN2
Reactome_Pathways_2024	Influenza Infection	3/169	0.0214694	0.0784199	5.33106	20.4773	RPL31;RPL11;CALR
Reactome_Pathways_2024	Signaling by BRAF and RAF1 Fusions	2/65	0.021795	0.0787798	9.27498	35.4868	VWF;FN1
Reactome_Pathways_2024	Scavenging by Class F Receptors	1/7	0.0242477	0.0852531	48.1256	179	CALR
Reactome_Pathways_2024	RUNX1 Regulates Transcription of Genes Involved in Differentiation of Myeloid Cells	1/7	0.0242477	0.0852531	48.1256	179	LGALS3
Reactome_Pathways_2024	MAPK Family Signaling Cascades	4/314	0.0243229	0.0852531	3.83578	14.255	VWF;MMP2;FN1;GFRA4
Reactome_Pathways_2024	RHOB GTPase Cycle	2/70	0.0250244	0.0868346	8.59083	31.6822	TFRC;STOM
Reactome_Pathways_2024	Erythrocytes Take up Oxygen and Release Carbon Dioxide	1/8	0.027664	0.0908075	41.2484	147.984	HBB
Reactome_Pathways_2024	Conjugation of Salicylate With Glycine	1/8	0.027664	0.0908075	41.2484	147.984	GLYATL2
Reactome_Pathways_2024	Terminal Pathway of Complement	1/8	0.027664	0.0908075	41.2484	147.984	CLU
Reactome_Pathways_2024	Lectin Pathway of Complement Activation	1/8	0.027664	0.0908075	41.2484	147.984	FCN1
Reactome_Pathways_2024	Glycolysis	2/74	0.0277395	0.0908075	8.11193	29.0804	HK3;HK1
Reactome_Pathways_2024	RHOC GTPase Cycle	2/74	0.0277395	0.0908075	8.11193	29.0804	TFRC;STOM
Reactome_Pathways_2024	Extra-nuclear Estrogen Signaling	2/75	0.028436	0.0913639	8.0004	28.4822	MMP2;MMP9
Reactome_Pathways_2024	Plasma Lipoprotein Assembly, Remodeling, and Clearance	2/75	0.028436	0.0913639	8.0004	28.4822	APOA1;A2M
Reactome_Pathways_2024	Amino Acid Conjugation	1/9	0.0310685	0.0936054	36.0906	125.291	GLYATL2
Reactome_Pathways_2024	Serine Biosynthesis	1/9	0.0310685	0.0936054	36.0906	125.291	PSAT1
Reactome_Pathways_2024	Atorvastatin ADME	1/9	0.0310685	0.0936054	36.0906	125.291	PON1
Reactome_Pathways_2024	Hydrolysis of LPC	1/9	0.0310685	0.0936054	36.0906	125.291	PLA2G4F
Reactome_Pathways_2024	Synthesis of 5-Eicosatetraenoic Acids	1/9	0.0310685	0.0936054	36.0906	125.291	PON1
Reactome_Pathways_2024	Conjugation of Carboxylic Acids	1/9	0.0310685	0.0936054	36.0906	125.291	GLYATL2
Reactome_Pathways_2024	Gamma-carboxylated Protein Precursors Transport From the Endoplasmic Reticulum to Golgi Apparatus	1/9	0.0310685	0.0936054	36.0906	125.291	F2
Reactome_Pathways_2024	Signaling by MET	2/79	0.0312917	0.0936054	7.58327	26.2715	COL1A1;FN1
Reactome_Pathways_2024	Oncogenic MAPK Signaling	2/82	0.0335049	0.096436	7.29779	24.7838	VWF;FN1
Reactome_Pathways_2024	ATF6 (ATF6-alpha) Activates Chaperone Genes	1/10	0.0344613	0.096436	32.0789	108.039	CALR
Reactome_Pathways_2024	Gamma-carboxylation of Protein Precursors	1/10	0.0344613	0.096436	32.0789	108.039	F2
Reactome_Pathways_2024	HDL Remodeling	1/10	0.0344613	0.096436	32.0789	108.039	APOA1
Reactome_Pathways_2024	Chylomicron Assembly	1/10	0.0344613	0.096436	32.0789	108.039	APOA1
Reactome_Pathways_2024	Chylomicron Remodeling	1/10	0.0344613	0.096436	32.0789	108.039	APOA1
Reactome_Pathways_2024	Virus Assembly and Release	1/10	0.0344613	0.096436	32.0789	108.039	CALR
Reactome_Pathways_2024	Removal of Aminoterminal Propeptides From Gamma-Carboxylated Proteins	1/10	0.0344613	0.096436	32.0789	108.039	F2
Reactome_Pathways_2024	Glucose Metabolism	2/85	0.0357776	0.0993187	7.03296	23.4228	HK3;HK1
Reactome_Pathways_2024	Gamma-carboxylation, Transport, and Amino-Terminal Cleavage of Proteins	1/11	0.0378424	0.104217	28.8696	94.5284	F2
Reactome_Pathways_2024	ALK Mutants Bind TKIs	1/12	0.0412118	0.106959	26.2437	83.6921	FN1
Reactome_Pathways_2024	Erythrocytes Take up Carbon Dioxide and Release Oxygen	1/12	0.0412118	0.106959	26.2437	83.6921	HBB
Reactome_Pathways_2024	ATF6 (ATF6-alpha) Activates Chaperones	1/12	0.0412118	0.106959	26.2437	83.6921	CALR
Reactome_Pathways_2024	Aspartate and Asparagine Metabolism	1/12	0.0412118	0.106959	26.2437	83.6921	ASNS
Reactome_Pathways_2024	O2 CO2 Exchange in Erythrocytes	1/12	0.0412118	0.106959	26.2437	83.6921	HBB
Reactome_Pathways_2024	Lysine Catabolism	1/12	0.0412118	0.106959	26.2437	83.6921	PIPOX
Reactome_Pathways_2024	Vitamin D (Calciferol) Metabolism	1/12	0.0412118	0.106959	26.2437	83.6921	GC
Reactome_Pathways_2024	EPH-Ephrin Signaling	2/92	0.0413042	0.106959	6.48366	20.6621	MMP2;MMP9
Reactome_Pathways_2024	Signaling by ALK Fusions and Activated Point Mutants	2/93	0.0421185	0.107464	6.41209	20.3088	FN1;MSN
Reactome_Pathways_2024	Signaling by ALK in Cancer	2/93	0.0421185	0.107464	6.41209	20.3088	FN1;MSN
Reactome_Pathways_2024	Peptide Chain Elongation	2/94	0.0429388	0.108219	6.34207	19.9647	RPL31;RPL11
Reactome_Pathways_2024	Immunoregulatory Interactions Between a Lymphoid and a non-Lymphoid Cell	3/223	0.0434057	0.108219	4.01153	12.5848	COL1A1;IGKV2D-30;LILRB5
Reactome_Pathways_2024	Unfolded Protein Response (UPR)	2/95	0.0437651	0.108219	6.27356	19.6295	ASNS;CALR
Reactome_Pathways_2024	Advanced Glycosylation Endproduct Receptor Signaling	1/13	0.0445695	0.108219	24.0556	74.8297	LGALS3
Reactome_Pathways_2024	Hormone Ligand-Binding Receptors	1/13	0.0445695	0.108219	24.0556	74.8297	GPHB5
Reactome_Pathways_2024	Dissolution of Fibrin Clot	1/13	0.0445695	0.108219	24.0556	74.8297	PLG
Reactome_Pathways_2024	Creation of C4 and C2 Activators	2/96	0.0445974	0.108219	6.20651	19.3027	FCN1;IGKV2D-30
Reactome_Pathways_2024	Eukaryotic Translation Termination	2/98	0.0462795	0.110752	6.07659	18.6737	RPL31;RPL11
Reactome_Pathways_2024	Selenocysteine Synthesis	2/98	0.0462795	0.110752	6.07659	18.6737	RPL31;RPL11
Reactome_Pathways_2024	Eukaryotic Translation Elongation	2/99	0.0471293	0.112013	6.01364	18.3708	RPL31;RPL11
Reactome_Pathways_2024	Physiological Factors	1/14	0.0479157	0.112505	22.204	67.4627	CES1
Reactome_Pathways_2024	Nonsense Mediated Decay (NMD) Independent of the Exon Junction Complex (EJC)	2/100	0.0479848	0.112505	5.95198	18.0754	RPL31;RPL11
Reactome_Pathways_2024	Metabolism of Lipids	6/758	0.0492318	0.114654	2.39087	7.19944	LIPE;PLA2G4F;PON1;APOA1;CPNE3;GC
Reactome_Pathways_2024	Viral mRNA Translation	2/102	0.0497128	0.115002	5.83235	17.5058	RPL31;RPL11
MGI_Mammalian_Phenotype_Level_4_2024	Abnormal Blood Coagulation MP:0002551	4/51	3.0367e-05	0.0245365	25.6389	266.7	VTN;VWF;PLG;F2
MGI_Mammalian_Phenotype_Level_4_2024	Decreased Circulating Adiponectin Level MP:0030968	3/24	7.88326e-05	0.0279308	42.4499	401.074	LIPE;LCN2;CES1
MGI_Mammalian_Phenotype_Level_4_2024	Increased Susceptibility To Bacterial Infection MP:0002412	6/214	0.000103704	0.0279308	8.88912	81.5486	FCN1;LGALS3;VWF;LCN2;PTX3;PGLYRP1
MGI_Mammalian_Phenotype_Level_4_2024	Decreased Cholesterol Efflux MP:0003193	2/8	0.000333537	0.0525787	97.6667	781.896	HP;APOA1
MGI_Mammalian_Phenotype_Level_4_2024	Abnormal Response To Injury MP:0005164	3/45	0.00052436	0.0525787	21.2026	160.15	VTN;VWF;COL6A1
MGI_Mammalian_Phenotype_Level_4_2024	Abnormal Extracellular Matrix Morphology MP:0013258	2/10	0.000533619	0.0525787	73.2426	551.944	COL1A1;FN1
MGI_Mammalian_Phenotype_Level_4_2024	Abnormal Platelet Aggregation MP:0009548	2/10	0.000533619	0.0525787	73.2426	551.944	VTN;VWF
MGI_Mammalian_Phenotype_Level_4_2024	Abnormal Erythropoiesis MP:0000245	4/112	0.000642894	0.0525787	11.1235	81.7522	TFRC;LCN2;HBB;HK1
MGI_Mammalian_Phenotype_Level_4_2024	Myocarditis MP:0001856	2/11	0.000650726	0.0525787	65.1013	477.676	CLU;MMP9
MGI_Mammalian_Phenotype_Level_4_2024	Decreased Myocardial Fiber Number MP:0004567	2/11	0.000650726	0.0525787	65.1013	477.676	CALR;CLU
MGI_Mammalian_Phenotype_Level_4_2024	Increased Susceptibility To Xenobiotic Induced Morbidity/Mortality MP:0009766	4/116	0.000733436	0.0538742	10.724	77.4036	HP;PGLYRP1;GCLM;MMP9
MGI_Mammalian_Phenotype_Level_4_2024	Hypochromic Microcytic Anemia MP:0008388	2/14	0.00106937	0.0664656	48.8186	333.953	TFRC;HBB
MGI_Mammalian_Phenotype_Level_4_2024	Increased Kidney Iron Level MP:0010375	2/14	0.00106937	0.0664656	48.8186	333.953	HP;HK1
MGI_Mammalian_Phenotype_Level_4_2024	Arthritis MP:0002993	2/16	0.0014038	0.0756179	41.8403	274.831	COL1A1;MMP2
MGI_Mammalian_Phenotype_Level_4_2024	Increased Hepatocyte Proliferation MP:0003893	2/16	0.0014038	0.0756179	41.8403	274.831	COL1A1;PLG
MGI_Mammalian_Phenotype_Level_4_2024	Sepsis MP:0005044	2/17	0.00158738	0.0797802	39.049	251.697	LGALS3;LCN2
MGI_Mammalian_Phenotype_Level_4_2024	Decreased Hemoglobin Content MP:0002874	5/247	0.0017378	0.0797802	6.25811	39.7711	TFRC;HBB;MSN;ASNS;HK1
MGI_Mammalian_Phenotype_Level_4_2024	Lung Inflammation MP:0001861	4/149	0.00185272	0.0797802	8.26959	52.0248	COL1A1;LGALS3;PTX3;MMP9
MGI_Mammalian_Phenotype_Level_4_2024	Increased Body Weight MP:0001260	5/260	0.00217329	0.0797802	5.93514	36.3914	COL1A1;LGALS3;PSAT1;MMP9;CES1
MGI_Mammalian_Phenotype_Level_4_2024	Abnormal Induced Retina Neovascularization MP:0009660	2/20	0.00220268	0.0797802	32.5359	199.058	MMP2;MMP9
MGI_Mammalian_Phenotype_Level_4_2024	Microcytic Anemia MP:0002810	2/21	0.00242904	0.0797802	30.822	185.556	TFRC;HBB
MGI_Mammalian_Phenotype_Level_4_2024	Decreased Bone Trabecular Spacing MP:0013631	2/21	0.00242904	0.0797802	30.822	185.556	COL1A1;LGALS3
MGI_Mammalian_Phenotype_Level_4_2024	Decreased Tumor Incidence MP:0002052	2/21	0.00242904	0.0797802	30.822	185.556	SPN;MMP9
MGI_Mammalian_Phenotype_Level_4_2024	Decreased Susceptibility To Injury MP:0005166	3/77	0.00249554	0.0797802	12.0145	72.006	COL1A1;LGALS3;MMP9
MGI_Mammalian_Phenotype_Level_4_2024	Increased Macrophage Cell Number MP:0005425	3/78	0.0025889	0.0797802	11.8537	70.607	LCN2;LSP1;MMP9
MGI_Mammalian_Phenotype_Level_4_2024	Intestinal Ulcer MP:0000512	2/22	0.00266592	0.0797802	29.2794	173.545	PLG;PGLYRP1
MGI_Mammalian_Phenotype_Level_4_2024	Increased Circulating VLDL Cholesterol Level MP:0005145	2/22	0.00266592	0.0797802	29.2794	173.545	PON1;CES1
MGI_Mammalian_Phenotype_Level_4_2024	Decreased Circulating VLDL Cholesterol Level MP:0005146	2/23	0.00291323	0.0840676	27.8838	162.799	APOA1;CES1
MGI_Mammalian_Phenotype_Level_4_2024	Decreased Myocardial Infarct Size MP:0003038	2/24	0.00317091	0.0854031	26.615	153.136	VWF;MMP9
MGI_Mammalian_Phenotype_Level_4_2024	Decreased Susceptibility To Ischemic Brain Injury MP:0006059	2/24	0.00317091	0.0854031	26.615	153.136	VWF;MMP9
MGI_Mammalian_Phenotype_Level_4_2024	Brain Inflammation MP:0001847	2/25	0.00343887	0.0896325	25.4565	144.405	LGALS3;MMP2
MGI_Mammalian_Phenotype_Level_4_2024	Decreased Circulating Glycerol Level MP:0003442	2/26	0.00371705	0.0938554	24.3946	136.484	LIPE;CES1
MGI_Mammalian_Phenotype_Level_4_2024	Increased Liver Triglyceride Level MP:0009355	3/91	0.00400258	0.0951864	10.096	55.7381	LGALS3;LCN2;CES1
MGI_Mammalian_Phenotype_Level_4_2024	Decreased Susceptibility To Induced Thrombosis MP:0031120	2/27	0.00400537	0.0951864	23.4176	129.268	VWF;F2
MGI_Mammalian_Phenotype_Level_4_2024	Hemolytic Anemia MP:0001585	2/28	0.00430376	0.0993553	22.5158	122.672	HBB;HK1
MGI_Mammalian_Phenotype_Level_4_2024	Decreased Length Of Long Bones MP:0004686	3/98	0.0049247	0.104837	9.34878	49.6747	COL1A1;MMP2;MMP9
MGI_Mammalian_Phenotype_Level_4_2024	Abnormal Cellular Extravasation MP:0009858	2/30	0.00493046	0.104837	20.9055	111.057	CTTN;LSP1
MGI_Mammalian_Phenotype_Level_4_2024	Polychromatophilia MP:0005097	2/30	0.00493046	0.104837	20.9055	111.057	HBB;HK1
MGI_Mammalian_Phenotype_Level_4_2024	Abnormal Cornea Epithelium Morphology MP:0006000	2/31	0.00525863	0.106272	20.1836	105.921	KRT4;PLG
MGI_Mammalian_Phenotype_Level_4_2024	Abnormal Neutrophil Physiology MP:0002463	3/101	0.00535589	0.106272	9.06122	47.3862	CTTN;PGLYRP1;MMP9
MGI_Mammalian_Phenotype_Level_4_2024	Abnormal Bone Marrow Cell Physiology MP:0009278	2/32	0.00559658	0.106272	19.5098	101.17	MMP2;MMP9
MGI_Mammalian_Phenotype_Level_4_2024	Osteopetrosis MP:0000067	2/32	0.00559658	0.106272	19.5098	101.17	COL1A1;MMP9
MGI_Mammalian_Phenotype_Level_4_2024	Increased Kidney Weight MP:0003917	3/103	0.00565558	0.106272	8.8791	45.9504	LIPE;HP;LCN2
MGI_Mammalian_Phenotype_Level_4_2024	Increased Oxygen Consumption MP:0005289	3/106	0.0061237	0.107762	8.61919	43.9198	LIPE;HBB;CES1
MGI_Mammalian_Phenotype_Level_4_2024	Abnormal Dendritic Cell Physiology MP:0002376	3/107	0.00628473	0.107762	8.53588	43.2738	LGALS3;PTX3;MMP9
MGI_Mammalian_Phenotype_Level_4_2024	Abnormal Brown Adipose Tissue Morphology MP:0002971	2/34	0.00630156	0.107762	18.2886	92.6676	LIPE;CES1
MGI_Mammalian_Phenotype_Level_4_2024	Abnormal Intestinal Goblet Cell Morphology MP:0003449	2/34	0.00630156	0.107762	18.2886	92.6676	PGLYRP1;MMP9
MGI_Mammalian_Phenotype_Level_4_2024	Increased Physiological Sensitivity To Xenobiotic MP:0008873	3/108	0.00644828	0.107762	8.45416	42.6423	PON1;GCLM;CES1
MGI_Mammalian_Phenotype_Level_4_2024	Decreased Bone Strength MP:0004991	2/35	0.00666844	0.107762	17.7335	88.8514	COL1A1;LGALS3
MGI_Mammalian_Phenotype_Level_4_2024	Increased Brown Adipose Tissue Amount MP:0000005	2/35	0.00666844	0.107762	17.7335	88.8514	LIPE;LCN2
MGI_Mammalian_Phenotype_Level_4_2024	Abnormal Vascular Smooth Muscle Physiology MP:0005595	2/36	0.00704483	0.111612	17.2111	85.2888	MMP2;MMP9
MGI_Mammalian_Phenotype_Level_4_2024	Abnormal Dermal Layer Morphology MP:0001243	2/37	0.00743065	0.113282	16.7185	81.9564	COL1A1;KRT4
MGI_Mammalian_Phenotype_Level_4_2024	Impaired Wound Healing MP:0001792	2/37	0.00743065	0.113282	16.7185	81.9564	FN1;PLG
MGI_Mammalian_Phenotype_Level_4_2024	Pallor MP:0003717	4/225	0.00801189	0.119882	5.40491	26.0886	TFRC;HBB;F2;HK1
MGI_Mammalian_Phenotype_Level_4_2024	Embryo Tissue Necrosis MP:0013241	2/39	0.00823033	0.120911	15.8132	75.9022	TFRC;F2
MGI_Mammalian_Phenotype_Level_4_2024	Increased Fat Cell Size MP:0006094	2/40	0.00864405	0.124721	15.3963	73.146	LIPE;LCN2
MGI_Mammalian_Phenotype_Level_4_2024	Small Pancreatic Islets MP:0009172	2/41	0.00906693	0.125822	15.0008	70.5504	COL1A1;CES1
MGI_Mammalian_Phenotype_Level_4_2024	Increased White Adipose Tissue Amount MP:0000008	2/42	0.00949891	0.125822	14.625	68.1025	LCN2;CES1
MGI_Mammalian_Phenotype_Level_4_2024	Anisocytosis MP:0002642	2/42	0.00949891	0.125822	14.625	68.1025	HBB;HK1
MGI_Mammalian_Phenotype_Level_4_2024	Abnormal Compact Bone Morphology MP:0003797	2/42	0.00949891	0.125822	14.625	68.1025	COL1A1;MMP2
MGI_Mammalian_Phenotype_Level_4_2024	Impaired Macrophage Phagocytosis MP:0001798	2/42	0.00949891	0.125822	14.625	68.1025	LGALS3;PTX3
MGI_Mammalian_Phenotype_Level_4_2024	Oxidative Stress MP:0003674	3/127	0.0100456	0.130916	7.1519	32.9032	LGALS3;PON1;GCLM
MGI_Mammalian_Phenotype_Level_4_2024	Anemia MP:0001577	4/242	0.0102782	0.131172	5.01451	22.9551	TFRC;FN1;HBB;HK1
MGI_Mammalian_Phenotype_Level_4_2024	Increased Vascular Permeability MP:0003070	2/44	0.0103899	0.131172	13.9272	63.6043	CTTN;MMP9
MGI_Mammalian_Phenotype_Level_4_2024	Increased Erythroid Progenitor Cell Number MP:0003135	2/45	0.0108487	0.134858	13.6026	61.5342	LCN2;HBB
MGI_Mammalian_Phenotype_Level_4_2024	Abnormal Trabecular Bone Morphology MP:0000130	3/134	0.0116119	0.142158	6.76735	30.1534	COL1A1;MMP2;MMP9
MGI_Mammalian_Phenotype_Level_4_2024	Decreased Bone Volume MP:0010876	2/48	0.0122781	0.145892	12.7136	55.9389	COL1A1;MMP2
MGI_Mammalian_Phenotype_Level_4_2024	Abnormal Response To Cardiac Infarction MP:0000343	2/48	0.0122781	0.145892	12.7136	55.9389	MMP2;MMP9
MGI_Mammalian_Phenotype_Level_4_2024	Increased Spleen Red Pulp Amount MP:0008476	2/49	0.0127718	0.14811	12.4424	54.2554	HBB;HK1
MGI_Mammalian_Phenotype_Level_4_2024	Abnormal Leukocyte Physiology MP:0002442	2/51	0.0137851	0.14811	11.9334	51.1246	LGALS3;LSP1
MGI_Mammalian_Phenotype_Level_4_2024	Abnormal Osteoblast Physiology MP:0005006	2/51	0.0137851	0.14811	11.9334	51.1246	COL1A1;GC
MGI_Mammalian_Phenotype_Level_4_2024	Embryonic Lethality, Complete Penetrance MP:0011092	5/406	0.0138507	0.14811	3.74621	16.0316	COL1A1;TFRC;GSS;FN1;COLGALT1
MGI_Mammalian_Phenotype_Level_4_2024	Decreased Hematocrit MP:0000208	4/266	0.0141304	0.14811	4.54962	19.3788	TFRC;HBB;MSN;HK1
MGI_Mammalian_Phenotype_Level_4_2024	Kinked Neural Tube MP:0003400	2/53	0.0148321	0.14811	11.4642	48.2755	TFRC;FN1
MGI_Mammalian_Phenotype_Level_4_2024	Abnormal Long Bone Hypertrophic Chondrocyte Zone MP:0000165	2/53	0.0148321	0.14811	11.4642	48.2755	LGALS3;MMP9
MGI_Mammalian_Phenotype_Level_4_2024	Distended Pericardium MP:0000292	2/53	0.0148321	0.14811	11.4642	48.2755	FN1;F2
MGI_Mammalian_Phenotype_Level_4_2024	Increased Susceptibility To Experimental Autoimmune Encephalomyelitis MP:0004799	2/54	0.015368	0.14811	11.2432	46.9456	VWF;MMP2
MGI_Mammalian_Phenotype_Level_4_2024	Decreased Susceptibility To Induced Arthritis MP:0003436	2/55	0.0159123	0.14811	11.0305	45.6737	F2;MMP9
MGI_Mammalian_Phenotype_Level_4_2024	Impaired Adaptive Thermogenesis MP:0011049	2/55	0.0159123	0.14811	11.0305	45.6737	LCN2;CES1
MGI_Mammalian_Phenotype_Level_4_2024	Decreased Physiological Sensitivity To Xenobiotic MP:0008874	3/152	0.0162552	0.14811	5.94441	24.487	LCN2;MMP9;CES1
MGI_Mammalian_Phenotype_Level_4_2024	Decreased Tumor Growth/Size MP:0003447	2/56	0.0164647	0.14811	10.8257	44.4561	MMP2;PLG
MGI_Mammalian_Phenotype_Level_4_2024	Liver Fibrosis MP:0003333	2/58	0.0175939	0.14811	10.438	42.1717	LGALS3;PLG
MGI_Mammalian_Phenotype_Level_4_2024	Increased Body Length MP:0001257	2/58	0.0175939	0.14811	10.438	42.1717	SPN;COL1A1
MGI_Mammalian_Phenotype_Level_4_2024	Abnormal Kidney Physiology MP:0002136	2/59	0.0181706	0.14811	10.2544	41.0991	LGALS3;HP
MGI_Mammalian_Phenotype_Level_4_2024	Abnormal Vascular Wound Healing MP:0004883	2/59	0.0181706	0.14811	10.2544	41.0991	APOA1;MMP9
MGI_Mammalian_Phenotype_Level_4_2024	Increased Bone Mineral Density MP:0000062	3/161	0.0189146	0.14811	5.60325	22.2327	COL1A1;LGALS3;LIPE
MGI_Mammalian_Phenotype_Level_4_2024	Insulin Resistance MP:0005331	3/163	0.0195364	0.14811	5.53265	21.7736	LIPE;LCN2;CES1
MGI_Mammalian_Phenotype_Level_4_2024	Abnormal Acute Phase Protein Level MP:0010211	1/6	0.0208195	0.14811	57.7536	223.614	PLG
MGI_Mammalian_Phenotype_Level_4_2024	Abnormal Blood Gas Level MP:0002329	1/6	0.0208195	0.14811	57.7536	223.614	COL1A1
MGI_Mammalian_Phenotype_Level_4_2024	Melena MP:0003292	1/6	0.0208195	0.14811	57.7536	223.614	VWF
MGI_Mammalian_Phenotype_Level_4_2024	Broad Face MP:0030069	1/6	0.0208195	0.14811	57.7536	223.614	COL1A1
MGI_Mammalian_Phenotype_Level_4_2024	Abnormal Circulating Apolipoprotein Level MP:0010332	1/6	0.0208195	0.14811	57.7536	223.614	CES1
MGI_Mammalian_Phenotype_Level_4_2024	Abnormal Dental Pulp Cavity Morphology MP:0002819	1/6	0.0208195	0.14811	57.7536	223.614	COL1A1
MGI_Mammalian_Phenotype_Level_4_2024	Decreased Glutathione Level MP:0012604	1/6	0.0208195	0.14811	57.7536	223.614	GCLM
MGI_Mammalian_Phenotype_Level_4_2024	Abnormal Feces Lipid Level MP:0014476	1/6	0.0208195	0.14811	57.7536	223.614	LIPE
MGI_Mammalian_Phenotype_Level_4_2024	Thin Tail MP:0000589	1/6	0.0208195	0.14811	57.7536	223.614	COL1A1
MGI_Mammalian_Phenotype_Level_4_2024	Venoocclusion MP:0006137	1/6	0.0208195	0.14811	57.7536	223.614	PLG
MGI_Mammalian_Phenotype_Level_4_2024	Abnormal Lambdoid Suture Morphology MP:0003841	1/6	0.0208195	0.14811	57.7536	223.614	MMP2
MGI_Mammalian_Phenotype_Level_4_2024	Abnormal Osteocyte Lacuna Morphology MP:0030484	1/6	0.0208195	0.14811	57.7536	223.614	COL1A1
MGI_Mammalian_Phenotype_Level_4_2024	Impaired Granulocyte Bactericidal Activity MP:0005074	1/6	0.0208195	0.14811	57.7536	223.614	PGLYRP1
MGI_Mammalian_Phenotype_Level_4_2024	Increased Aerobic Running Capacity MP:0003060	1/6	0.0208195	0.14811	57.7536	223.614	HBB
MGI_Mammalian_Phenotype_Level_4_2024	Increased Inner Canthal Distance MP:0030166	1/6	0.0208195	0.14811	57.7536	223.614	MMP2
MGI_Mammalian_Phenotype_Level_4_2024	Increased Number Of Heinz Bodies MP:0011171	1/6	0.0208195	0.14811	57.7536	223.614	HBB
MGI_Mammalian_Phenotype_Level_4_2024	Abnormal Stomach Morphology MP:0000470	2/65	0.021795	0.14811	9.27498	35.4868	MMP2;PLG
MGI_Mammalian_Phenotype_Level_4_2024	Abnormal Long Bone Epiphyseal Plate Morphology MP:0003055	2/66	0.0224259	0.14811	9.1296	34.67	LGALS3;MMP9
MGI_Mammalian_Phenotype_Level_4_2024	Increased Bleeding Time MP:0005606	2/66	0.0224259	0.14811	9.1296	34.67	VWF;F2
MGI_Mammalian_Phenotype_Level_4_2024	Hepatic Steatosis MP:0002628	3/172	0.0224739	0.14811	5.23563	19.8713	LGALS3;LCN2;CES1
MGI_Mammalian_Phenotype_Level_4_2024	Intracranial Hemorrhage MP:0001915	2/67	0.0230644	0.14811	8.98869	33.8825	COL1A1;F2
MGI_Mammalian_Phenotype_Level_4_2024	Increased Circulating Cholesterol Level MP:0005178	4/313	0.0240751	0.14811	3.84839	14.3413	LIPE;LCN2;APOA1;CES1
MGI_Mammalian_Phenotype_Level_4_2024	Absent Limb Buds MP:0004573	1/7	0.0242477	0.14811	48.1256	179	FN1
MGI_Mammalian_Phenotype_Level_4_2024	Joint Swelling MP:0002936	1/7	0.0242477	0.14811	48.1256	179	MMP9
MGI_Mammalian_Phenotype_Level_4_2024	Leptocytosis MP:0010175	1/7	0.0242477	0.14811	48.1256	179	HBB
MGI_Mammalian_Phenotype_Level_4_2024	Abnormal Cellular Cholesterol Metabolism MP:0003191	1/7	0.0242477	0.14811	48.1256	179	APOA1
MGI_Mammalian_Phenotype_Level_4_2024	Placenta Necrosis MP:0013247	1/7	0.0242477	0.14811	48.1256	179	COLGALT1
MGI_Mammalian_Phenotype_Level_4_2024	Short Vertebral Body MP:0004706	1/7	0.0242477	0.14811	48.1256	179	COL1A1
MGI_Mammalian_Phenotype_Level_4_2024	Decreased Neuronal Stem Cell Self-Renewal MP:0012207	1/7	0.0242477	0.14811	48.1256	179	COL1A1
MGI_Mammalian_Phenotype_Level_4_2024	Thick Myocardium MP:0010656	1/7	0.0242477	0.14811	48.1256	179	FN1
MGI_Mammalian_Phenotype_Level_4_2024	Thick Neurocranium MP:0030278	1/7	0.0242477	0.14811	48.1256	179	COL1A1
MGI_Mammalian_Phenotype_Level_4_2024	Thin Body MP:0013138	1/7	0.0242477	0.14811	48.1256	179	COL1A1
MGI_Mammalian_Phenotype_Level_4_2024	Abnormal Ischium Morphology MP:0004507	1/7	0.0242477	0.14811	48.1256	179	COL1A1
MGI_Mammalian_Phenotype_Level_4_2024	Abnormal Mesangial Matrix Morphology MP:0011338	1/7	0.0242477	0.14811	48.1256	179	CLU
MGI_Mammalian_Phenotype_Level_4_2024	Abnormal Monocyte Morphology MP:0002620	1/7	0.0242477	0.14811	48.1256	179	LGALS3
MGI_Mammalian_Phenotype_Level_4_2024	Abnormal Pubis Morphology MP:0004506	1/7	0.0242477	0.14811	48.1256	179	COL1A1
MGI_Mammalian_Phenotype_Level_4_2024	Increased Activity Of Parathyroid MP:0003432	1/7	0.0242477	0.14811	48.1256	179	GC
MGI_Mammalian_Phenotype_Level_4_2024	Abnormal Tendon Collagen Fibril Morphology MP:0011643	1/7	0.0242477	0.14811	48.1256	179	COL1A1
MGI_Mammalian_Phenotype_Level_4_2024	Increased Heart Ventricle Muscle Contractility MP:0005600	1/7	0.0242477	0.14811	48.1256	179	MMP9
MGI_Mammalian_Phenotype_Level_4_2024	Increased Susceptibility To Picornaviridae Infection Induced Morbidity/Mortality MP:0031040	1/7	0.0242477	0.14811	48.1256	179	MMP9
MGI_Mammalian_Phenotype_Level_4_2024	Decreased Circulating Iron Level MP:0004151	2/70	0.0250244	0.14811	8.59083	31.6822	TFRC;LCN2
MGI_Mammalian_Phenotype_Level_4_2024	Increased Circulating LDL Cholesterol Level MP:0000182	2/70	0.0250244	0.14811	8.59083	31.6822	PON1;LCN2
MGI_Mammalian_Phenotype_Level_4_2024	Increased Susceptibility To Injury MP:0005165	2/72	0.0263676	0.14811	8.34454	30.3376	MSN;COLGALT1
MGI_Mammalian_Phenotype_Level_4_2024	Decreased Susceptibility To Experimental Autoimmune Encephalomyelitis MP:0004800	2/72	0.0263676	0.14811	8.34454	30.3376	SPN;MMP9
MGI_Mammalian_Phenotype_Level_4_2024	Abnormal Cell Morphology MP:0000358	2/73	0.02705	0.14811	8.22659	29.6986	COL1A1;CTTN
MGI_Mammalian_Phenotype_Level_4_2024	Abnormal Response To Infection MP:0005025	2/73	0.02705	0.14811	8.22659	29.6986	LGALS3;MMP9
MGI_Mammalian_Phenotype_Level_4_2024	Increased Circulating Alanine Transaminase Level MP:0002941	4/326	0.0274192	0.14811	3.69057	13.2732	LGALS3;GC;GCLM;CES1
MGI_Mammalian_Phenotype_Level_4_2024	Increased Unsaturated Fatty Acids Level MP:0005283	1/8	0.027664	0.14811	41.2484	147.984	CES1
MGI_Mammalian_Phenotype_Level_4_2024	Intestinal Hemorrhage MP:0031154	1/8	0.027664	0.14811	41.2484	147.984	F2
MGI_Mammalian_Phenotype_Level_4_2024	Aortic Dissection MP:0004044	1/8	0.027664	0.14811	41.2484	147.984	COL1A1
MGI_Mammalian_Phenotype_Level_4_2024	Abnormal Bone Collagen Fibril Morphology MP:0011642	1/8	0.027664	0.14811	41.2484	147.984	COL1A1
MGI_Mammalian_Phenotype_Level_4_2024	Abnormal Circulating Free Fatty Acids Level MP:0001553	1/8	0.027664	0.14811	41.2484	147.984	LIPE
MGI_Mammalian_Phenotype_Level_4_2024	Premature Ovarian Failure MP:0031020	1/8	0.027664	0.14811	41.2484	147.984	GCLM
MGI_Mammalian_Phenotype_Level_4_2024	Skin Hyperplasia MP:0001214	1/8	0.027664	0.14811	41.2484	147.984	COL1A1
MGI_Mammalian_Phenotype_Level_4_2024	Abnormal Forelimb Zeugopod Morphology MP:0003855	1/8	0.027664	0.14811	41.2484	147.984	COL1A1
MGI_Mammalian_Phenotype_Level_4_2024	Thin Neurocranium MP:0030279	1/8	0.027664	0.14811	41.2484	147.984	COL1A1
MGI_Mammalian_Phenotype_Level_4_2024	Abnormal Osteocyte Morphology MP:0008753	1/8	0.027664	0.14811	41.2484	147.984	COL1A1
MGI_Mammalian_Phenotype_Level_4_2024	Increased Circulating Phospholipid Level MP:0003980	1/8	0.027664	0.14811	41.2484	147.984	CES1
MGI_Mammalian_Phenotype_Level_4_2024	Increased Cornea Epithelium Thickness MP:0020854	1/8	0.027664	0.14811	41.2484	147.984	KRT4
MGI_Mammalian_Phenotype_Level_4_2024	Increased Macrophage Apoptosis MP:0011080	1/8	0.027664	0.14811	41.2484	147.984	LGALS3
MGI_Mammalian_Phenotype_Level_4_2024	Abnormal Inflammatory Response MP:0001845	2/74	0.0277395	0.14811	8.11193	29.0804	MMP2;PLG
MGI_Mammalian_Phenotype_Level_4_2024	Decreased Angiogenesis MP:0005602	2/78	0.0305675	0.14811	7.68344	26.7984	MMP2;PLG
MGI_Mammalian_Phenotype_Level_4_2024	Increased Interleukin-6 Secretion MP:0008705	2/78	0.0305675	0.14811	7.68344	26.7984	LGALS3;PGLYRP1
MGI_Mammalian_Phenotype_Level_4_2024	Increased Susceptibility To Atherosclerosis MP:0005339	1/9	0.0310685	0.14811	36.0906	125.291	PON1
MGI_Mammalian_Phenotype_Level_4_2024	Liver Hyperplasia MP:0005141	1/9	0.0310685	0.14811	36.0906	125.291	COL1A1
MGI_Mammalian_Phenotype_Level_4_2024	Myocardium Hypertrophy MP:0010633	1/9	0.0310685	0.14811	36.0906	125.291	COL1A1
MGI_Mammalian_Phenotype_Level_4_2024	Coarse Hair MP:0002832	1/9	0.0310685	0.14811	36.0906	125.291	COL1A1
MGI_Mammalian_Phenotype_Level_4_2024	Abnormal Chest Morphology MP:0004134	1/9	0.0310685	0.14811	36.0906	125.291	COL1A1
MGI_Mammalian_Phenotype_Level_4_2024	Abnormal Dentin Mineralization MP:0030451	1/9	0.0310685	0.14811	36.0906	125.291	COL1A1
MGI_Mammalian_Phenotype_Level_4_2024	Skeletal Muscle Endomysial Fibrosis MP:0009420	1/9	0.0310685	0.14811	36.0906	125.291	COL6A1
MGI_Mammalian_Phenotype_Level_4_2024	Subcutaneous Hemorrhage MP:0031152	1/9	0.0310685	0.14811	36.0906	125.291	F2
MGI_Mammalian_Phenotype_Level_4_2024	Thin Ribs MP:0004674	1/9	0.0310685	0.14811	36.0906	125.291	COL1A1
MGI_Mammalian_Phenotype_Level_4_2024	Decreased Susceptibility To Age Related Obesity MP:0003213	1/9	0.0310685	0.14811	36.0906	125.291	COL1A1
MGI_Mammalian_Phenotype_Level_4_2024	Decreased Susceptibility To Induced Choroidal Neovascularization MP:0003434	1/9	0.0310685	0.14811	36.0906	125.291	PLG
MGI_Mammalian_Phenotype_Level_4_2024	Abnormal Lateral Plate Mesoderm Morphology MP:0010117	1/9	0.0310685	0.14811	36.0906	125.291	FN1
MGI_Mammalian_Phenotype_Level_4_2024	Abnormal Placenta Intervillous Maternal Lacunae Morphology MP:0011525	1/9	0.0310685	0.14811	36.0906	125.291	COLGALT1
MGI_Mammalian_Phenotype_Level_4_2024	Hypochromic Anemia MP:0008387	1/9	0.0310685	0.14811	36.0906	125.291	HBB
MGI_Mammalian_Phenotype_Level_4_2024	Abnormal Rostral-Caudal Patterning Of The Somites MP:0008530	1/9	0.0310685	0.14811	36.0906	125.291	FN1
MGI_Mammalian_Phenotype_Level_4_2024	Increased Bone Mineralization MP:0020080	1/9	0.0310685	0.14811	36.0906	125.291	GFRA4
MGI_Mammalian_Phenotype_Level_4_2024	Abnormal Thyroid Gland Physiology MP:0002876	1/9	0.0310685	0.14811	36.0906	125.291	GFRA4
MGI_Mammalian_Phenotype_Level_4_2024	Internal Hemorrhage MP:0001634	2/79	0.0312917	0.14811	7.58327	26.2715	VWF;F2
MGI_Mammalian_Phenotype_Level_4_2024	Abnormal Angiogenesis MP:0000260	2/79	0.0312917	0.14811	7.58327	26.2715	MMP2;MMP9
MGI_Mammalian_Phenotype_Level_4_2024	Reticulocytosis MP:0002640	2/79	0.0312917	0.14811	7.58327	26.2715	HBB;HK1
MGI_Mammalian_Phenotype_Level_4_2024	Decreased Mean Corpuscular Volume MP:0002591	3/197	0.0318299	0.14811	4.55516	15.7032	TFRC;HBB;F2
MGI_Mammalian_Phenotype_Level_4_2024	Increased Susceptibility To Induced Morbidity/Mortality MP:0009763	3/199	0.0326541	0.14811	4.50822	15.4262	LGALS3;LCN2;PLG
MGI_Mammalian_Phenotype_Level_4_2024	Increased Susceptibility To Bacterial Infection Induced Morbidity/Mortality MP:0009788	2/83	0.0342559	0.14811	7.20733	24.3168	FCN1;PGLYRP1
MGI_Mammalian_Phenotype_Level_4_2024	Decreased Liver Triglyceride Level MP:0009356	2/83	0.0342559	0.14811	7.20733	24.3168	LIPE;CES1
MGI_Mammalian_Phenotype_Level_4_2024	Delayed Bone Ossification MP:0000060	2/83	0.0342559	0.14811	7.20733	24.3168	COL1A1;MMP9
MGI_Mammalian_Phenotype_Level_4_2024	Abnormal Sertoli Cell Development MP:0004109	1/10	0.0344613	0.14811	32.0789	108.039	LGALS3
MGI_Mammalian_Phenotype_Level_4_2024	Abnormal Coronal Suture Morphology MP:0003840	1/10	0.0344613	0.14811	32.0789	108.039	MMP2
MGI_Mammalian_Phenotype_Level_4_2024	Renal Glomerulus Fibrosis MP:0011377	1/10	0.0344613	0.14811	32.0789	108.039	CLU
MGI_Mammalian_Phenotype_Level_4_2024	Decreased Circulating Interleukin-10 Level MP:0008594	1/10	0.0344613	0.14811	32.0789	108.039	MMP9
MGI_Mammalian_Phenotype_Level_4_2024	Decreased Collagen Level MP:0020254	1/10	0.0344613	0.14811	32.0789	108.039	COL1A1
MGI_Mammalian_Phenotype_Level_4_2024	Abnormal Esophageal Epithelium Morphology MP:0000468	1/10	0.0344613	0.14811	32.0789	108.039	KRT4
MGI_Mammalian_Phenotype_Level_4_2024	Decreased Liver Iron Level MP:0008743	1/10	0.0344613	0.14811	32.0789	108.039	TFRC
MGI_Mammalian_Phenotype_Level_4_2024	Abnormal Larynx Morphology MP:0002249	1/10	0.0344613	0.14811	32.0789	108.039	PLG
MGI_Mammalian_Phenotype_Level_4_2024	Abnormal Placenta Junctional Zone Morphology MP:0008957	1/10	0.0344613	0.14811	32.0789	108.039	COLGALT1
MGI_Mammalian_Phenotype_Level_4_2024	Impaired Short-Term Object Recognition Memory MP:0014365	1/10	0.0344613	0.14811	32.0789	108.039	ASNS
MGI_Mammalian_Phenotype_Level_4_2024	Increased Cardiac Muscle Glycogen Level MP:0014071	1/10	0.0344613	0.14811	32.0789	108.039	CALR
MGI_Mammalian_Phenotype_Level_4_2024	Abnormal Stomach Epithelium Morphology MP:0000471	1/10	0.0344613	0.14811	32.0789	108.039	KRT4
MGI_Mammalian_Phenotype_Level_4_2024	Increased Compact Bone Volume MP:0010964	1/10	0.0344613	0.14811	32.0789	108.039	LGALS3
MGI_Mammalian_Phenotype_Level_4_2024	Abnormal Myocardium Layer Morphology MP:0005329	2/84	0.0350135	0.149687	7.11908	23.8633	COL1A1;CLU
MGI_Mammalian_Phenotype_Level_4_2024	Decreased Mean Corpuscular Hemoglobin MP:0005562	3/207	0.0360619	0.153358	4.32968	14.3854	TFRC;HBB;HK1
MGI_Mammalian_Phenotype_Level_4_2024	Increased Trabecular Bone Connectivity Density MP:0010932	1/11	0.0378424	0.154427	28.8696	94.5284	LGALS3
MGI_Mammalian_Phenotype_Level_4_2024	Aneurysm MP:0003279	1/11	0.0378424	0.154427	28.8696	94.5284	COL1A1
MGI_Mammalian_Phenotype_Level_4_2024	Abnormal Aorta Elastic Tissue Morphology MP:0009862	1/11	0.0378424	0.154427	28.8696	94.5284	COL1A1
MGI_Mammalian_Phenotype_Level_4_2024	Ocular Hypertension MP:0005258	1/11	0.0378424	0.154427	28.8696	94.5284	COL1A1
MGI_Mammalian_Phenotype_Level_4_2024	Abnormal Embryonic Erythrocyte Morphology MP:0004230	1/11	0.0378424	0.154427	28.8696	94.5284	TFRC
MGI_Mammalian_Phenotype_Level_4_2024	Schistocytosis MP:0000314	1/11	0.0378424	0.154427	28.8696	94.5284	HBB
MGI_Mammalian_Phenotype_Level_4_2024	Abnormal Sagittal Suture Morphology MP:0003843	1/11	0.0378424	0.154427	28.8696	94.5284	MMP2
MGI_Mammalian_Phenotype_Level_4_2024	Increased Erythrocyte Clearance MP:0010035	1/11	0.0378424	0.154427	28.8696	94.5284	HBB
MGI_Mammalian_Phenotype_Level_4_2024	Abnormal Heart Ventricle Morphology MP:0005294	2/89	0.0388981	0.154508	6.70825	21.7804	PLOD2;CLU
MGI_Mammalian_Phenotype_Level_4_2024	Thin Ventricular Wall MP:0000280	2/91	0.040496	0.154508	6.55684	21.0248	PLOD2;CALR
MGI_Mammalian_Phenotype_Level_4_2024	Thrombocytopenia MP:0003179	3/218	0.0410357	0.154508	4.10587	13.1113	VWF;LCN2;MSN
MGI_Mammalian_Phenotype_Level_4_2024	Abnormal Locomotor Behavior MP:0001392	3/218	0.0410357	0.154508	4.10587	13.1113	SPN;COL1A1;COL6A1
MGI_Mammalian_Phenotype_Level_4_2024	Abnormal CD8-positive, Alpha-Beta Cytotoxic T Cell Morphology MP:0002436	1/12	0.0412118	0.154508	26.2437	83.6921	LGALS3
MGI_Mammalian_Phenotype_Level_4_2024	Acidosis MP:0003031	1/12	0.0412118	0.154508	26.2437	83.6921	HBB
MGI_Mammalian_Phenotype_Level_4_2024	Joint Inflammation MP:0002933	1/12	0.0412118	0.154508	26.2437	83.6921	MMP9
MGI_Mammalian_Phenotype_Level_4_2024	Abnormal Bone Healing MP:0002999	1/12	0.0412118	0.154508	26.2437	83.6921	COL1A1
MGI_Mammalian_Phenotype_Level_4_2024	Cardiac Edema MP:0012270	1/12	0.0412118	0.154508	26.2437	83.6921	CLU
MGI_Mammalian_Phenotype_Level_4_2024	Peritoneal Inflammation MP:0003303	1/12	0.0412118	0.154508	26.2437	83.6921	LGALS3
MGI_Mammalian_Phenotype_Level_4_2024	Renal Glomerular Protein Deposits MP:0020518	1/12	0.0412118	0.154508	26.2437	83.6921	CLU
MGI_Mammalian_Phenotype_Level_4_2024	Small Intestinal Inflammation MP:0003306	1/12	0.0412118	0.154508	26.2437	83.6921	LGALS3
MGI_Mammalian_Phenotype_Level_4_2024	Impaired Myelopoiesis MP:0001602	1/12	0.0412118	0.154508	26.2437	83.6921	MMP9
MGI_Mammalian_Phenotype_Level_4_2024	Increased T-helper 2 Cell Number MP:0008090	1/12	0.0412118	0.154508	26.2437	83.6921	MMP9
MGI_Mammalian_Phenotype_Level_4_2024	Increased Granulosa Cell Apoptosis MP:0013508	1/12	0.0412118	0.154508	26.2437	83.6921	GCLM
MGI_Mammalian_Phenotype_Level_4_2024	Increased Interleukin-12B Secretion MP:0008669	1/12	0.0412118	0.154508	26.2437	83.6921	LGALS3
MGI_Mammalian_Phenotype_Level_4_2024	Increased Partial Thromboplastin Time MP:0012359	1/12	0.0412118	0.154508	26.2437	83.6921	VWF
MGI_Mammalian_Phenotype_Level_4_2024	Decreased Inflammatory Response MP:0001876	2/92	0.0413042	0.154508	6.48366	20.6621	MMP2;MMP9
MGI_Mammalian_Phenotype_Level_4_2024	Decreased Circulating Triglyceride Level MP:0002644	3/222	0.0429263	0.155897	4.03006	12.6877	LIPE;GC;CES1
MGI_Mammalian_Phenotype_Level_4_2024	Increased Erythrocyte Cell Number MP:0003131	2/95	0.0437651	0.155897	6.27356	19.6295	TFRC;LCN2
MGI_Mammalian_Phenotype_Level_4_2024	Exencephaly MP:0000914	3/224	0.0438878	0.155897	3.99318	12.4831	PSAT1;CALR;COLGALT1
MGI_Mammalian_Phenotype_Level_4_2024	Abnormal Adipose Tissue Distribution MP:0000013	1/13	0.0445695	0.155897	24.0556	74.8297	COL1A1
MGI_Mammalian_Phenotype_Level_4_2024	Skeletal Muscle Necrosis MP:0003852	1/13	0.0445695	0.155897	24.0556	74.8297	COL6A1
MGI_Mammalian_Phenotype_Level_4_2024	Abnormal Hemoglobin MP:0001588	1/13	0.0445695	0.155897	24.0556	74.8297	HBB
MGI_Mammalian_Phenotype_Level_4_2024	Thin Placenta Labyrinth MP:0011523	1/13	0.0445695	0.155897	24.0556	74.8297	COLGALT1
MGI_Mammalian_Phenotype_Level_4_2024	Abnormal Intercostal Muscle Morphology MP:0002280	1/13	0.0445695	0.155897	24.0556	74.8297	COL6A1
MGI_Mammalian_Phenotype_Level_4_2024	Delayed Female Fertility MP:0008976	1/13	0.0445695	0.155897	24.0556	74.8297	COL1A1
MGI_Mammalian_Phenotype_Level_4_2024	Impaired Blood-Brain Barrier Function MP:0031384	1/13	0.0445695	0.155897	24.0556	74.8297	VWF
MGI_Mammalian_Phenotype_Level_4_2024	Abnormal Professional Antigen Presenting Cell Physiology MP:0002452	1/13	0.0445695	0.155897	24.0556	74.8297	PTX3
MGI_Mammalian_Phenotype_Level_4_2024	Impaired Sperm Migration In Female Genital Tract MP:0031012	1/13	0.0445695	0.155897	24.0556	74.8297	OVCH2
MGI_Mammalian_Phenotype_Level_4_2024	Increased Circulating Interferon-Beta Level MP:0008575	1/13	0.0445695	0.155897	24.0556	74.8297	MMP9
MGI_Mammalian_Phenotype_Level_4_2024	Abnormal White Fat Cell Morphology MP:0009117	1/13	0.0445695	0.155897	24.0556	74.8297	LIPE
MGI_Mammalian_Phenotype_Level_4_2024	Increased Prostaglandin Level MP:0009814	1/13	0.0445695	0.155897	24.0556	74.8297	MMP9
MGI_Mammalian_Phenotype_Level_4_2024	Increased Circulating Free Fatty Acids Level MP:0001554	2/99	0.0471293	0.156744	6.01364	18.3708	LIPE;CES1
MGI_Mammalian_Phenotype_Level_4_2024	Increased Circulating Insulin Level MP:0002079	3/231	0.0473379	0.156744	3.86921	11.8028	LIPE;LCN2;CES1
MGI_Mammalian_Phenotype_Level_4_2024	Abnormal Golgi Apparatus Morphology MP:0011743	1/14	0.0479157	0.156744	22.204	67.4627	COL1A1
MGI_Mammalian_Phenotype_Level_4_2024	Absent Visceral Yolk Sac Blood Islands MP:0001721	1/14	0.0479157	0.156744	22.204	67.4627	FN1
MGI_Mammalian_Phenotype_Level_4_2024	Abnormal Articular Cartilage Morphology MP:0006433	1/14	0.0479157	0.156744	22.204	67.4627	MMP2
MGI_Mammalian_Phenotype_Level_4_2024	Decreased Circulating VLDL Triglyceride Level MP:0003976	1/14	0.0479157	0.156744	22.204	67.4627	CES1
MGI_Mammalian_Phenotype_Level_4_2024	Decreased Diameter Of Femur MP:0008152	1/14	0.0479157	0.156744	22.204	67.4627	COL1A1
MGI_Mammalian_Phenotype_Level_4_2024	Abnormal Fatty Acids Level MP:0005280	1/14	0.0479157	0.156744	22.204	67.4627	LIPE
MGI_Mammalian_Phenotype_Level_4_2024	Spherocytosis MP:0002812	1/14	0.0479157	0.156744	22.204	67.4627	HBB
MGI_Mammalian_Phenotype_Level_4_2024	Focal Hepatic Necrosis MP:0001656	1/14	0.0479157	0.156744	22.204	67.4627	LGALS3
MGI_Mammalian_Phenotype_Level_4_2024	Fused Carpal Bones MP:0008915	1/14	0.0479157	0.156744	22.204	67.4627	COL1A1
MGI_Mammalian_Phenotype_Level_4_2024	Abnormal Ovary Physiology MP:0003507	1/14	0.0479157	0.156744	22.204	67.4627	GCLM
MGI_Mammalian_Phenotype_Level_4_2024	Increased Growth Rate MP:0002865	1/14	0.0479157	0.156744	22.204	67.4627	COL1A1
MGI_Mammalian_Phenotype_Level_4_2024	Abnormal Tongue Epithelium Morphology MP:0000764	1/14	0.0479157	0.156744	22.204	67.4627	KRT4
MGI_Mammalian_Phenotype_Level_4_2024	Abnormal Triglyceride Level MP:0000187	1/14	0.0479157	0.156744	22.204	67.4627	LIPE
MGI_Mammalian_Phenotype_Level_4_2024	Abnormal Vitamin D Level MP:0011228	1/14	0.0479157	0.156744	22.204	67.4627	GC
MGI_Mammalian_Phenotype_Level_4_2024	Increased Circulating Triglyceride Level MP:0001552	3/234	0.0488565	0.15866	3.81838	11.5272	LIPE;APOA1;CES1
MGI_Mammalian_Phenotype_Level_4_2024	Increased T Cell Proliferation MP:0005348	2/102	0.0497128	0.15866	5.83235	17.5058	SPN;MMP9

## Sheet: AM_Variants
Data base	Term	Overlap	P.value	Adjusted.P.value	Odds.Ratio	Combined.Score	Genes
KEGG_2021_Human	ECM-receptor interaction	2/88	0.00220657	0.0165379	33.0532	202.164	COL6A6;COL6A5
KEGG_2021_Human	Protein digestion and absorption	2/103	0.0030069	0.0165379	28.1231	163.306	COL6A6;COL6A5
KEGG_2021_Human	Focal adhesion	2/201	0.0109927	0.0403067	14.2032	64.0636	COL6A6;COL6A5
KEGG_2021_Human	Galactose metabolism	1/31	0.0245227	0.0500183	44.3422	164.428	GANC
KEGG_2021_Human	Human papillomavirus infection	2/331	0.0281206	0.0500183	8.53452	30.4789	COL6A6;COL6A5
KEGG_2021_Human	Starch and sucrose metabolism	1/36	0.0284248	0.0500183	37.9981	135.292	GANC
KEGG_2021_Human	PI3K-Akt signaling pathway	2/354	0.0318299	0.0500183	7.96753	27.4669	COL6A6;COL6A5
Reactome_Pathways_2024	NCAM1 Interactions	2/42	0.000507058	0.00772208	71.2286	540.403	COL6A6;COL6A5
Reactome_Pathways_2024	Collagen Chain Trimerization	2/44	0.000556597	0.00772208	67.8299	508.295	COL6A6;COL6A5
Reactome_Pathways_2024	Signaling by PDGF	2/58	0.000966248	0.00772208	50.8367	352.913	COL6A6;COL6A5
Reactome_Pathways_2024	Assembly of Collagen Fibrils and Other Multimeric Structures	2/61	0.00106822	0.00772208	48.2446	330.078	COL6A6;COL6A5
Reactome_Pathways_2024	NCAM Signaling for Neurite Out-Growth	2/63	0.00113895	0.00772208	46.6581	316.232	COL6A6;COL6A5
Reactome_Pathways_2024	Collagen Degradation	2/64	0.00117515	0.00772208	45.9032	309.68	COL6A6;COL6A5
Reactome_Pathways_2024	Collagen Biosynthesis and Modifying Enzymes	2/67	0.00128701	0.00772208	43.778	291.362	COL6A6;COL6A5
Reactome_Pathways_2024	ECM Proteoglycans	2/76	0.00165203	0.00867316	38.4363	246.213	COL6A6;COL6A5
Reactome_Pathways_2024	Integrin Cell Surface Interactions	2/85	0.00206073	0.00961672	34.253	211.844	COL6A6;COL6A5
Reactome_Pathways_2024	Collagen Formation	2/90	0.00230644	0.00968707	32.2987	196.119	COL6A6;COL6A5
Reactome_Pathways_2024	Degradation of the Extracellular Matrix	2/140	0.00547448	0.0209026	20.5445	106.989	COL6A6;COL6A5
Reactome_Pathways_2024	Cilium Assembly	2/200	0.0108884	0.0381095	14.2756	64.5266	CEP162;ASAP1
Reactome_Pathways_2024	VxPx Cargo-Targeting to Cilium	1/21	0.0166744	0.0538712	66.5467	272.434	ASAP1
Reactome_Pathways_2024	Organelle Biogenesis and Maintenance	2/297	0.0229919	0.0655953	9.53462	35.9705	CEP162;ASAP1
Reactome_Pathways_2024	Extracellular Matrix Organization	2/300	0.0234269	0.0655953	9.4372	35.426	COL6A6;COL6A5
Reactome_Pathways_2024	DNA Repair	2/312	0.0252012	0.0661532	9.06636	33.372	DCLRE1A;APBB1
Reactome_Pathways_2024	Maturation of Spike Protein 9694548	1/38	0.0299815	0.0699569	35.9405	126.05	ZDHHC5
Reactome_Pathways_2024	Fanconi Anemia Pathway	1/38	0.0299815	0.0699569	35.9405	126.05	DCLRE1A
Reactome_Pathways_2024	Cargo Trafficking to the Periciliary Membrane	1/51	0.0400434	0.088517	26.5787	85.5246	ASAP1
Reactome_Pathways_2024	Recruitment and ATM-med Phosphorylation of Repair and Signaling Proteins at DNA Double Strand Breaks	1/60	0.046952	0.0940121	22.5141	68.8624	APBB1
Reactome_Pathways_2024	DNA Double Strand Break Response	1/61	0.0477167	0.0940121	22.1378	67.3536	APBB1
Reactome_Pathways_2024	Translation of Structural Proteins 9694635	1/63	0.0492444	0.0940121	21.4215	64.4993	ZDHHC5
MGI_Mammalian_Phenotype_Level_4_2024	Abnormal Auditory Brainstem Response MP:0004738	3/318	0.00191223	0.0739977	14.4095	90.1962	C1ORF116;ZDHHC5;ASAP1
MGI_Mammalian_Phenotype_Level_4_2024	Abnormal Synaptic Vesicle Clustering MP:0004793	1/10	0.00797296	0.0739977	147.963	714.913	ZDHHC5
MGI_Mammalian_Phenotype_Level_4_2024	Decreased Diameter Of Femur MP:0008152	1/14	0.0111454	0.0739977	102.415	460.534	ASAP1
MGI_Mammalian_Phenotype_Level_4_2024	Increased Kidney Iron Level MP:0010375	1/14	0.0111454	0.0739977	102.415	460.534	HPX
MGI_Mammalian_Phenotype_Level_4_2024	Decreased White Fat Cell Number MP:0009131	1/15	0.0119371	0.0739977	95.0952	421.092	ASAP1
MGI_Mammalian_Phenotype_Level_4_2024	Abnormal Passive Avoidance Behavior MP:0002799	1/16	0.0127281	0.0739977	88.7511	387.305	APBB1
MGI_Mammalian_Phenotype_Level_4_2024	Abnormal Adipose Tissue Development MP:0011167	1/18	0.0143084	0.0739977	78.302	332.541	ASAP1
MGI_Mammalian_Phenotype_Level_4_2024	Abnormal Hippocampus Neuron Morphology MP:0009939	1/19	0.0150977	0.0739977	73.9481	310.08	ZDHHC5
MGI_Mammalian_Phenotype_Level_4_2024	Delayed Intramembranous Bone Ossification MP:0003420	1/20	0.0158863	0.0739977	70.0526	290.179	ASAP1
MGI_Mammalian_Phenotype_Level_4_2024	Abnormal Premaxilla Morphology MP:0002820	1/20	0.0158863	0.0739977	70.0526	290.179	ASAP1
MGI_Mammalian_Phenotype_Level_4_2024	Shortened PR Interval MP:0010511	1/20	0.0158863	0.0739977	70.0526	290.179	ZDHHC5
MGI_Mammalian_Phenotype_Level_4_2024	Abnormal Fat Cell Differentiation MP:0011168	1/22	0.0174619	0.0739977	63.3746	256.524	ASAP1
MGI_Mammalian_Phenotype_Level_4_2024	Disorganized Long Bone Epiphyseal Plate MP:0006397	1/24	0.0190351	0.0739977	57.858	229.203	ASAP1
MGI_Mammalian_Phenotype_Level_4_2024	Decreased Retroperitoneal Fat Pad Weight MP:0009305	1/24	0.0190351	0.0739977	57.858	229.203	ASAP1
MGI_Mammalian_Phenotype_Level_4_2024	Decreased Pulmonary Respiratory Rate MP:0005574	1/25	0.0198208	0.0739977	55.4444	217.399	ASAP1
MGI_Mammalian_Phenotype_Level_4_2024	Increased Cellular Sensitivity To Ionizing Radiation MP:0004227	1/30	0.0237405	0.076883	45.8736	171.593	APBB1
MGI_Mammalian_Phenotype_Level_4_2024	Decreased Bone Ossification MP:0020040	1/32	0.0253043	0.076883	42.9097	157.77	ASAP1
MGI_Mammalian_Phenotype_Level_4_2024	Decreased Cranium Height MP:0008525	1/33	0.0260853	0.076883	41.5667	151.568	ASAP1
MGI_Mammalian_Phenotype_Level_4_2024	Abnormal Lumbar Vertebrae Morphology MP:0003049	1/33	0.0260853	0.076883	41.5667	151.568	ASAP1
MGI_Mammalian_Phenotype_Level_4_2024	Increased Width Of Hypertrophic Chondrocyte Zone MP:0003408	1/39	0.030759	0.0840958	34.993	121.831	ASAP1
MGI_Mammalian_Phenotype_Level_4_2024	Decreased Gonadal Fat Pad Weight MP:0009283	1/40	0.0315359	0.0840958	34.094	117.85	ASAP1
MGI_Mammalian_Phenotype_Level_4_2024	Abnormal Frontal Bone Morphology MP:0000107	1/43	0.0338631	0.086197	31.654	107.162	ASAP1
MGI_Mammalian_Phenotype_Level_4_2024	Abnormal Cell Differentiation MP:0005076	1/45	0.0354117	0.0862198	30.2121	100.93	ASAP1
MGI_Mammalian_Phenotype_Level_4_2024	Abnormal Proximal Convoluted Tubule Morphology MP:0004756	1/48	0.0377302	0.0880371	28.2794	92.6801	HPX
MGI_Mammalian_Phenotype_Level_4_2024	Abnormal Phalanx Morphology MP:0005306	1/52	0.0408134	0.089188	26.0562	83.3472	ASAP1
MGI_Mammalian_Phenotype_Level_4_2024	Delayed Endochondral Bone Ossification MP:0003419	1/53	0.0415827	0.089188	25.5538	81.263	ASAP1
MGI_Mammalian_Phenotype_Level_4_2024	Decreased White Fat Cell Size MP:0009133	1/57	0.0446543	0.089188	23.7238	73.7527	ASAP1
MGI_Mammalian_Phenotype_Level_4_2024	Abnormal Mandible Morphology MP:0000458	1/58	0.0454208	0.089188	23.3064	72.0585	ASAP1
MGI_Mammalian_Phenotype_Level_4_2024	Abnormal Kidney Physiology MP:0002136	1/59	0.0461867	0.089188	22.9034	70.4296	HPX

## Sheet: ML_Variants
Data base	Term	Overlap	P.value	Adjusted.P.value	Odds.Ratio	Combined.Score	Genes
KEGG_2021_Human	Neutrophil extracellular trap formation	3/189	0.000841056	0.10345	18.7799	132.978	PADI4;ATG7;MAPK3
KEGG_2021_Human	Adherens junction	2/71	0.00226517	0.139308	32.0628	195.266	PARD3;MAPK3
KEGG_2021_Human	Autophagy	2/137	0.00816335	0.199382	16.3333	78.5323	ATG7;MAPK3
KEGG_2021_Human	Axon guidance	2/182	0.0140508	0.199382	12.2222	52.1287	PARD3;MAPK3
KEGG_2021_Human	Chemokine signaling pathway	2/192	0.0155488	0.199382	11.5731	48.1877	PARD3;MAPK3
KEGG_2021_Human	Proteoglycans in cancer	2/205	0.0175948	0.199382	10.8248	43.734	GPC1;MAPK3
KEGG_2021_Human	Rap1 signaling pathway	2/210	0.0184109	0.199382	10.562	42.1931	PARD3;MAPK3
KEGG_2021_Human	Aldosterone-regulated sodium reabsorption	1/37	0.0363737	0.199382	29.1579	96.6267	MAPK3
KEGG_2021_Human	Thyroid cancer	1/37	0.0363737	0.199382	29.1579	96.6267	MAPK3
KEGG_2021_Human	Bladder cancer	1/41	0.0402298	0.199382	26.2368	84.3028	MAPK3
KEGG_2021_Human	Ferroptosis	1/41	0.0402298	0.199382	26.2368	84.3028	ATG7
KEGG_2021_Human	Human papillomavirus infection	2/331	0.0426431	0.199382	6.63661	20.9378	PARD3;MAPK3
KEGG_2021_Human	Type II diabetes mellitus	1/46	0.0450293	0.199382	23.3158	72.2892	MAPK3
Reactome_Pathways_2024	Signaling by BRAF and RAF1 Fusions	2/65	0.00190282	0.115313	35.127	220.05	ATG7;MAPK3
Reactome_Pathways_2024	Oncogenic MAPK Signaling	2/82	0.00300735	0.115313	27.6389	160.491	ATG7;MAPK3
Reactome_Pathways_2024	Infection With Mycobacterium Tuberculosis	2/82	0.00300735	0.115313	27.6389	160.491	LTF;MAPK3
Reactome_Pathways_2024	Signaling by TGF-beta Receptor Complex	2/94	0.00392987	0.115313	24.0193	133.047	PARD3;MAPK3
Reactome_Pathways_2024	Mtb Iron Assimilation by Chelation	1/6	0.00598569	0.115313	210.263	1076.21	LTF
Reactome_Pathways_2024	Negative Feedback Regulation of MAPK Pathway	1/6	0.00598569	0.115313	210.263	1076.21	MAPK3
Reactome_Pathways_2024	Metal Sequestration by Antimicrobial Proteins	1/6	0.00598569	0.115313	210.263	1076.21	LTF
Reactome_Pathways_2024	Signaling by LTK in Cancer	1/7	0.00698	0.115313	175.211	869.869	MAPK3
Reactome_Pathways_2024	RSK Activation	1/7	0.00698	0.115313	175.211	869.869	MAPK3
Reactome_Pathways_2024	IFNG Signaling Activates MAPKs	1/8	0.00797336	0.115313	150.173	725.583	MAPK3
Reactome_Pathways_2024	Bacterial Infection Pathways	2/143	0.00886498	0.115313	15.6336	73.8787	LTF;MAPK3
Reactome_Pathways_2024	Diseases of Glycosylation	2/146	0.00922564	0.115313	15.3056	71.7183	GPC1;ADAMTS9
Reactome_Pathways_2024	Activation of the AP-1 Family of Transcription Factors	1/10	0.00995725	0.115313	116.789	538.336	MAPK3
Reactome_Pathways_2024	Signal Attenuation	1/10	0.00995725	0.115313	116.789	538.336	MAPK3
Reactome_Pathways_2024	MAPK3 (ERK1) Activation	1/10	0.00995725	0.115313	116.789	538.336	MAPK3
Reactome_Pathways_2024	Formation of Apoptosome	1/11	0.0109478	0.115313	105.105	474.51	MAPK3
Reactome_Pathways_2024	Regulation of the Apoptosome Activity	1/11	0.0109478	0.115313	105.105	474.51	MAPK3
Reactome_Pathways_2024	Signaling by TGFB Family Members	2/161	0.0111259	0.115313	13.8512	62.3091	PARD3;MAPK3
Reactome_Pathways_2024	Frs2-mediated Activation	1/12	0.0119374	0.115313	95.5455	423.083	MAPK3
Reactome_Pathways_2024	Suppression of Apoptosis	1/12	0.0119374	0.115313	95.5455	423.083	MAPK3
Reactome_Pathways_2024	Advanced Glycosylation Endproduct Receptor Signaling	1/13	0.012926	0.115313	87.5789	380.838	MAPK3
Reactome_Pathways_2024	Cytochrome C-Mediated Apoptotic Response	1/13	0.012926	0.115313	87.5789	380.838	MAPK3
Reactome_Pathways_2024	ERKs Are Inactivated	1/13	0.012926	0.115313	87.5789	380.838	MAPK3
Reactome_Pathways_2024	Golgi Cisternae Pericentriolar Stack Reorganization	1/14	0.0139137	0.115313	80.8381	345.573	MAPK3
Reactome_Pathways_2024	Synthesis of IP2, IP, and Ins in the Cytosol	1/14	0.0139137	0.115313	80.8381	345.573	SYNJ1
Reactome_Pathways_2024	Prolonged ERK Activation Events	1/14	0.0139137	0.115313	80.8381	345.573	MAPK3
Reactome_Pathways_2024	Defective EXT1 Causes Exostoses 1, TRPS2 and CHDS	1/14	0.0139137	0.115313	80.8381	345.573	GPC1
Reactome_Pathways_2024	Defective EXT2 Causes Exostoses 2	1/14	0.0139137	0.115313	80.8381	345.573	GPC1
Reactome_Pathways_2024	Spry Regulation of FGF Signaling	1/16	0.0158863	0.115313	70.0526	290.179	MAPK3
Reactome_Pathways_2024	TGF-beta Receptor Signaling in EMT (Epithelial to Mesenchymal Transition)	1/16	0.0158863	0.115313	70.0526	290.179	PARD3
Reactome_Pathways_2024	Signaling by Activin	1/17	0.0168712	0.115313	65.6711	268.079	MAPK3
Reactome_Pathways_2024	Gastrin-CREB Signalling Pathway via PKC and MAPK	1/18	0.0178552	0.115313	61.805	248.793	MAPK3
Reactome_Pathways_2024	Apoptotic Factor-Mediated Response	1/20	0.0198203	0.115313	55.2936	216.809	MAPK3
Reactome_Pathways_2024	Defective B3GALT6 Causes EDSP2 and SEMDJL1	1/20	0.0198203	0.115313	55.2936	216.809	GPC1
Reactome_Pathways_2024	Defective B3GAT3 Causes JDSSDHD	1/20	0.0198203	0.115313	55.2936	216.809	GPC1
Reactome_Pathways_2024	Defective B4GALT7 Causes EDS, Progeroid Type	1/20	0.0198203	0.115313	55.2936	216.809	GPC1
Reactome_Pathways_2024	Signal Transduction by L1	1/21	0.0208015	0.115313	52.5263	203.42	MAPK3
Reactome_Pathways_2024	NPAS4 Regulates Expression of Target Genes	1/22	0.0217817	0.115313	50.0226	191.421	MAPK3
Reactome_Pathways_2024	ERK MAPK Targets	1/22	0.0217817	0.115313	50.0226	191.421	MAPK3
Reactome_Pathways_2024	Signaling by NODAL	1/23	0.022761	0.115313	47.7464	180.611	MAPK3
Reactome_Pathways_2024	RAF-independent MAPK1 3 Activation	1/23	0.022761	0.115313	47.7464	180.611	MAPK3
Reactome_Pathways_2024	Chromatin Modifying Enzymes	2/238	0.0232701	0.115313	9.29567	34.9571	PADI4;WDR77
Reactome_Pathways_2024	Chromatin Organization	2/238	0.0232701	0.115313	9.29567	34.9571	PADI4;WDR77
Reactome_Pathways_2024	Estrogen-dependent Nuclear Events Downstream of ESR-membrane Signaling	1/24	0.0237393	0.115313	45.6682	170.827	MAPK3
Reactome_Pathways_2024	Growth Hormone Receptor Signaling	1/24	0.0237393	0.115313	45.6682	170.827	MAPK3
Reactome_Pathways_2024	HS-GAG Degradation	1/24	0.0237393	0.115313	45.6682	170.827	GPC1
Reactome_Pathways_2024	RHO GTPases Activate NADPH Oxidases	1/24	0.0237393	0.115313	45.6682	170.827	MAPK3
Reactome_Pathways_2024	RUNX2 Regulates Osteoblast Differentiation	1/24	0.0237393	0.115313	45.6682	170.827	MAPK3
Reactome_Pathways_2024	A Tetrasaccharide Linker Sequence Is Required for GAG Synthesis	1/26	0.0256933	0.115313	42.0105	153.823	GPC1
Reactome_Pathways_2024	Attachment and Entry 9694614	1/26	0.0256933	0.115313	42.0105	153.823	GPC1
Reactome_Pathways_2024	Synthesis of IP3 and IP4 in the Cytosol	1/26	0.0256933	0.115313	42.0105	153.823	SYNJ1
Reactome_Pathways_2024	CREB1 Phosphorylation Through NMDA Receptor-Mediated Activation of RAS Signaling	1/28	0.0276435	0.115313	38.8947	139.569	MAPK3
Reactome_Pathways_2024	Diseases of Metabolism	2/264	0.0282048	0.115313	8.36217	29.8384	GPC1;ADAMTS9
Reactome_Pathways_2024	Negative Regulation of FGFR3 Signaling	1/29	0.0286172	0.115313	37.5038	133.279	MAPK3
Reactome_Pathways_2024	Negative Regulation of FGFR4 Signaling	1/31	0.0305619	0.115313	35	122.08	MAPK3
Reactome_Pathways_2024	HS-GAG Biosynthesis	1/31	0.0305619	0.115313	35	122.08	GPC1
Reactome_Pathways_2024	RNA Polymerase I Promoter Opening	1/31	0.0305619	0.115313	35	122.08	MAPK3
Reactome_Pathways_2024	Tight Junction Interactions	1/31	0.0305619	0.115313	35	122.08	PARD3
Reactome_Pathways_2024	RUNX2 Regulates Bone Development	1/31	0.0305619	0.115313	35	122.08	MAPK3
Reactome_Pathways_2024	MAPK Targets Nuclear Events Mediated by MAP Kinases	1/31	0.0305619	0.115313	35	122.08	MAPK3
Reactome_Pathways_2024	Downregulation of SMAD2 3 SMAD4 Transcriptional Activity	1/31	0.0305619	0.115313	35	122.08	MAPK3
Reactome_Pathways_2024	Respiratory Syncytial Virus (RSV) Attachment and Entry	1/32	0.0315328	0.115313	33.8693	117.077	GPC1
Reactome_Pathways_2024	Thrombin Signalling Through Proteinase Activated Receptors (PARs)	1/32	0.0315328	0.115313	33.8693	117.077	MAPK3
Reactome_Pathways_2024	Hemostasis	3/707	0.0320369	0.115313	4.83189	16.6259	GPC1;KIF1A;MAPK3
Reactome_Pathways_2024	Negative Regulation of FGFR1 Signaling	1/33	0.0325028	0.115313	32.8092	112.418	MAPK3
Reactome_Pathways_2024	Negative Regulation of FGFR2 Signaling	1/34	0.0334719	0.115313	31.8134	108.072	MAPK3
Reactome_Pathways_2024	Signalling to ERKs	1/34	0.0334719	0.115313	31.8134	108.072	MAPK3
Reactome_Pathways_2024	Nuclear Events Stimulated by ALK Signaling in Cancer	1/35	0.0344401	0.115313	30.8762	104.007	MAPK3
Reactome_Pathways_2024	Oncogene Induced Senescence	1/35	0.0344401	0.115313	30.8762	104.007	MAPK3
Reactome_Pathways_2024	Latent Infection - Other Responses of Mtb to Phagocytosis	1/35	0.0344401	0.115313	30.8762	104.007	LTF
Reactome_Pathways_2024	Transcriptional Regulation by NPAS4	1/35	0.0344401	0.115313	30.8762	104.007	MAPK3
Reactome_Pathways_2024	SMAD2 SMAD3 SMAD4 Heterotrimer Regulates Transcription	1/36	0.0354073	0.115313	29.9925	100.2	MAPK3
Reactome_Pathways_2024	Signaling by High-Kinase Activity BRAF Mutants	1/36	0.0354073	0.115313	29.9925	100.2	MAPK3
Reactome_Pathways_2024	RHO GTPases Activate WASPs and WAVEs	1/36	0.0354073	0.115313	29.9925	100.2	MAPK3
Reactome_Pathways_2024	Defective B3GALTL Causes PpS	1/38	0.0373391	0.118236	28.3684	93.2673	ADAMTS9
Reactome_Pathways_2024	Response of Mtb to Phagocytosis	1/39	0.0383036	0.118236	27.6205	90.1039	MAPK3
Reactome_Pathways_2024	O-glycosylation of TSR Domain-Containing Proteins	1/39	0.0383036	0.118236	27.6205	90.1039	ADAMTS9
Reactome_Pathways_2024	Signaling by FGFR3	1/40	0.0392671	0.118236	26.9109	87.1206	MAPK3
Reactome_Pathways_2024	MAP2K and MAPK Activation	1/40	0.0392671	0.118236	26.9109	87.1206	MAPK3
Reactome_Pathways_2024	Signaling by FGFR4	1/41	0.0402298	0.118236	26.2368	84.3028	MAPK3
Reactome_Pathways_2024	Signaling by RAF1 Mutants	1/41	0.0402298	0.118236	26.2368	84.3028	MAPK3
Reactome_Pathways_2024	Diseases Associated With Glycosaminoglycan Metabolism	1/41	0.0402298	0.118236	26.2368	84.3028	GPC1
Reactome_Pathways_2024	Negative Regulation of MAPK Pathway	1/43	0.0421524	0.120695	24.985	79.114	MAPK3
Reactome_Pathways_2024	Retinoid Metabolism and Transport	1/44	0.0431123	0.120695	24.4027	76.7208	GPC1
Reactome_Pathways_2024	Paradoxical Activation of RAF Signaling by Kinase Inactive BRAF	1/45	0.0440713	0.120695	23.8469	74.4487	MAPK3
Reactome_Pathways_2024	Signaling by RAS Mutants	1/45	0.0440713	0.120695	23.8469	74.4487	MAPK3
Reactome_Pathways_2024	Signaling by Moderate Kinase Activity BRAF Mutants	1/45	0.0440713	0.120695	23.8469	74.4487	MAPK3
Reactome_Pathways_2024	Signaling Downstream of RAS Mutants	1/45	0.0440713	0.120695	23.8469	74.4487	MAPK3
Reactome_Pathways_2024	Early SARS-CoV-2 Infection Events	1/46	0.0450293	0.121933	23.3158	72.2892	GPC1
Reactome_Pathways_2024	Inositol Phosphate Metabolism	1/48	0.0469428	0.12297	22.3214	68.2772	SYNJ1
Reactome_Pathways_2024	RMTs Methylate Histone Arginines	1/48	0.0469428	0.12297	22.3214	68.2772	WDR77
Reactome_Pathways_2024	Metabolism of Fat-Soluble Vitamins	1/48	0.0469428	0.12297	22.3214	68.2772	GPC1
Reactome_Pathways_2024	Chondroitin Sulfate Dermatan Sulfate Metabolism	1/50	0.0488525	0.12635	21.4082	64.6301	GPC1
Reactome_Pathways_2024	Transcriptional Activity of SMAD2 SMAD3 SMAD4 Heterotrimer	1/51	0.0498061	0.12635	20.9789	62.9288	MAPK3
Reactome_Pathways_2024	Transcriptional and Post-Translational Regulation of MITF-M Expression and Activity	1/51	0.0498061	0.12635	20.9789	62.9288	MAPK3
MGI_Mammalian_Phenotype_Level_4_2024	Abnormal Lymph Node Morphology MP:0002339	3/205	0.00106369	0.0910207	17.2784	118.288	GPC1;PADI4;ADAMTS9
MGI_Mammalian_Phenotype_Level_4_2024	Increased Inner Canthal Distance MP:0030166	1/6	0.00598569	0.0910207	210.263	1076.21	FREM1
MGI_Mammalian_Phenotype_Level_4_2024	Heart Atrium Hypoplasia MP:0004055	1/6	0.00598569	0.0910207	210.263	1076.21	PARD3
MGI_Mammalian_Phenotype_Level_4_2024	Broad Nasal Bone MP:0004472	1/6	0.00598569	0.0910207	210.263	1076.21	FREM1
MGI_Mammalian_Phenotype_Level_4_2024	Fused Right Lung Lobes MP:0010977	1/7	0.00698	0.0910207	175.211	869.869	FREM1
MGI_Mammalian_Phenotype_Level_4_2024	Abnormal Epidermal Pigmentation MP:0009387	1/7	0.00698	0.0910207	175.211	869.869	ADAMTS9
MGI_Mammalian_Phenotype_Level_4_2024	Abnormal Intracellular Organelle Morphology MP:0014239	1/7	0.00698	0.0910207	175.211	869.869	ATG7
MGI_Mammalian_Phenotype_Level_4_2024	Decreased Susceptibility To Weight Loss MP:0010181	1/7	0.00698	0.0910207	175.211	869.869	PADI4
MGI_Mammalian_Phenotype_Level_4_2024	Prostate Gland Epithelial Hyperplasia MP:0001167	1/7	0.00698	0.0910207	175.211	869.869	WDR77
MGI_Mammalian_Phenotype_Level_4_2024	Early Eyelid Opening MP:0003153	1/8	0.00797336	0.0910207	150.173	725.583	FREM1
MGI_Mammalian_Phenotype_Level_4_2024	Abnormal Cochlear Nerve Compound Action Potential MP:0004415	1/8	0.00797336	0.0910207	150.173	725.583	KLHL18
MGI_Mammalian_Phenotype_Level_4_2024	Abnormal Eye Morphology MP:0002092	3/423	0.00819546	0.0910207	8.21849	39.483	GPC1;FREM1;ADAMTS9
MGI_Mammalian_Phenotype_Level_4_2024	Abnormal Active Avoidance Behavior MP:0002798	1/10	0.00995725	0.0910207	116.789	538.336	MAPK3
MGI_Mammalian_Phenotype_Level_4_2024	Decreased Susceptibility To Orthomyxoviridae Infection MP:0020947	1/10	0.00995725	0.0910207	116.789	538.336	PADI4
MGI_Mammalian_Phenotype_Level_4_2024	Abnormal Prostate Gland Epithelium Morphology MP:0001168	1/10	0.00995725	0.0910207	116.789	538.336	WDR77
MGI_Mammalian_Phenotype_Level_4_2024	Abnormal Synaptic Vesicle Clustering MP:0004793	1/10	0.00995725	0.0910207	116.789	538.336	KIF1A
MGI_Mammalian_Phenotype_Level_4_2024	Absent Eyelids MP:0001341	1/10	0.00995725	0.0910207	116.789	538.336	FREM1
MGI_Mammalian_Phenotype_Level_4_2024	Abnormal Midface Morphology MP:0030095	1/11	0.0109478	0.0910207	105.105	474.51	FREM1
MGI_Mammalian_Phenotype_Level_4_2024	Small Liver MP:0000601	2/166	0.0117947	0.0910207	13.4255	59.6106	GPC1;PADI4
MGI_Mammalian_Phenotype_Level_4_2024	Impaired Neutrophil Phagocytosis MP:0002467	1/12	0.0119374	0.0910207	95.5455	423.083	PADI4
MGI_Mammalian_Phenotype_Level_4_2024	Bleb MP:0008854	1/12	0.0119374	0.0910207	95.5455	423.083	FREM1
MGI_Mammalian_Phenotype_Level_4_2024	Increased Synaptic Depression MP:0002916	1/13	0.012926	0.0910207	87.5789	380.838	SYNJ1
MGI_Mammalian_Phenotype_Level_4_2024	Abnormal Anogenital Distance MP:0005189	1/13	0.012926	0.0910207	87.5789	380.838	FREM1
MGI_Mammalian_Phenotype_Level_4_2024	Abnormal Diaphragm Development MP:0012251	1/13	0.012926	0.0910207	87.5789	380.838	FREM1
MGI_Mammalian_Phenotype_Level_4_2024	Abnormal Passive Avoidance Behavior MP:0002799	1/16	0.0158863	0.0926057	70.0526	290.179	MAPK3
MGI_Mammalian_Phenotype_Level_4_2024	Abnormal Cranial Suture Morphology MP:0002835	1/16	0.0158863	0.0926057	70.0526	290.179	FREM1
MGI_Mammalian_Phenotype_Level_4_2024	Decreased Spleen Iron Level MP:0008808	1/17	0.0168712	0.0926057	65.6711	268.079	LTF
MGI_Mammalian_Phenotype_Level_4_2024	Midface Hypoplasia MP:0012085	1/17	0.0168712	0.0926057	65.6711	268.079	FREM1
MGI_Mammalian_Phenotype_Level_4_2024	Decreased Cornea Thickness MP:0005543	1/18	0.0178552	0.0926057	61.805	248.793	FREM1
MGI_Mammalian_Phenotype_Level_4_2024	Enlarged Heart MP:0000274	3/572	0.0184666	0.0926057	6.02016	24.0312	PADI4;ADAMTS9;ATG7
MGI_Mammalian_Phenotype_Level_4_2024	Abnormal Embryo Morphology MP:0014134	1/19	0.0188382	0.0926057	58.3684	231.832	ADAMTS9
MGI_Mammalian_Phenotype_Level_4_2024	Decreased Basophil Cell Number MP:0002607	1/19	0.0188382	0.0926057	58.3684	231.832	PARD3
MGI_Mammalian_Phenotype_Level_4_2024	Eyelids Fail To Open MP:0005176	1/19	0.0188382	0.0926057	58.3684	231.832	FREM1
MGI_Mammalian_Phenotype_Level_4_2024	Increased Or Absent Threshold For Auditory Brainstem Response MP:0011967	2/224	0.0207799	0.0926057	9.88889	38.3073	KLHL18;KIF1A
MGI_Mammalian_Phenotype_Level_4_2024	Disorganized Extraembryonic Tissue MP:0002582	1/23	0.022761	0.0926057	47.7464	180.611	ADAMTS9
MGI_Mammalian_Phenotype_Level_4_2024	Ataxia MP:0001393	2/239	0.0234526	0.0926057	9.25598	34.7356	SYNJ1;KIF1A
MGI_Mammalian_Phenotype_Level_4_2024	Retina Fold MP:0021107	1/24	0.0237393	0.0926057	45.6682	170.827	FREM1
MGI_Mammalian_Phenotype_Level_4_2024	Abnormal Inner Hair Cell Stereociliary Bundle Morphology MP:0004532	1/24	0.0237393	0.0926057	45.6682	170.827	KLHL18
MGI_Mammalian_Phenotype_Level_4_2024	Increased Circulating Magnesium Level MP:0010092	1/24	0.0237393	0.0926057	45.6682	170.827	KLHL18
MGI_Mammalian_Phenotype_Level_4_2024	Blistering MP:0001208	1/24	0.0237393	0.0926057	45.6682	170.827	FREM1
MGI_Mammalian_Phenotype_Level_4_2024	Ventricular Hypoplasia MP:0000279	1/25	0.0247168	0.0926057	43.7632	161.936	PARD3
MGI_Mammalian_Phenotype_Level_4_2024	Abnormal Brain Morphology MP:0002152	2/250	0.0254985	0.0926057	8.8405	32.437	GPC1;FREM1
MGI_Mammalian_Phenotype_Level_4_2024	Increased Liver Iron Level MP:0008807	1/26	0.0256933	0.0926057	42.0105	153.823	LTF
MGI_Mammalian_Phenotype_Level_4_2024	Increased Heart Atrium Size MP:0008725	1/27	0.0266688	0.0926057	40.3927	146.394	PARD3
MGI_Mammalian_Phenotype_Level_4_2024	Abnormal Heart Valve Morphology MP:0000285	1/27	0.0266688	0.0926057	40.3927	146.394	ADAMTS9
MGI_Mammalian_Phenotype_Level_4_2024	Coloboma MP:0005262	1/27	0.0266688	0.0926057	40.3927	146.394	FREM1
MGI_Mammalian_Phenotype_Level_4_2024	Abnormal Iron Homeostasis MP:0005637	1/28	0.0276435	0.0926057	38.8947	139.569	LTF
MGI_Mammalian_Phenotype_Level_4_2024	Diaphragmatic Hernia MP:0003924	1/29	0.0286172	0.0926057	37.5038	133.279	FREM1
MGI_Mammalian_Phenotype_Level_4_2024	Abnormal Limb Posture MP:0004263	1/29	0.0286172	0.0926057	37.5038	133.279	KIF1A
MGI_Mammalian_Phenotype_Level_4_2024	Rectal Prolapse MP:0000493	1/29	0.0286172	0.0926057	37.5038	133.279	FREM1
MGI_Mammalian_Phenotype_Level_4_2024	Abnormal Heart Morphology MP:0000266	3/683	0.0293228	0.0926057	5.00865	17.6775	PADI4;ADAMTS9;ATG7
MGI_Mammalian_Phenotype_Level_4_2024	Disorganized Embryonic Tissue MP:0003988	1/30	0.02959	0.0926057	36.2087	127.466	ADAMTS9
MGI_Mammalian_Phenotype_Level_4_2024	Abnormal Nasal Bone Morphology MP:0000102	1/30	0.02959	0.0926057	36.2087	127.466	FREM1
MGI_Mammalian_Phenotype_Level_4_2024	Absent Blastocoele MP:0002663	1/30	0.02959	0.0926057	36.2087	127.466	URB1
MGI_Mammalian_Phenotype_Level_4_2024	Abnormal Postnatal Growth/Weight/Body Size MP:0002089	1/32	0.0315328	0.096368	33.8693	117.077	FREM1
MGI_Mammalian_Phenotype_Level_4_2024	Neonatal Lethality, Incomplete Penetrance MP:0011088	2/285	0.0324723	0.096368	7.73341	26.5053	SYNJ1;KIF1A
MGI_Mammalian_Phenotype_Level_4_2024	Abnormal Gallbladder Morphology MP:0005084	1/33	0.0325028	0.096368	32.8092	112.418	FREM1
MGI_Mammalian_Phenotype_Level_4_2024	Abnormal Locomotor Coordination MP:0003312	1/35	0.0344401	0.0982171	30.8762	104.007	KIF1A
MGI_Mammalian_Phenotype_Level_4_2024	Abnormal Mammary Gland Morphology MP:0000627	1/36	0.0354073	0.0982171	29.9925	100.2	ATG7
MGI_Mammalian_Phenotype_Level_4_2024	Decreased Interleukin-1 Beta Secretion MP:0008658	1/36	0.0354073	0.0982171	29.9925	100.2	MAPK3
MGI_Mammalian_Phenotype_Level_4_2024	Abnormal Embryo Size MP:0001697	2/299	0.0354511	0.0982171	7.36364	24.5916	ADAMTS9;ATG7
MGI_Mammalian_Phenotype_Level_4_2024	Decreased Red Blood Cell Distribution Width MP:0010068	1/38	0.0373391	0.101779	28.3684	93.2673	SYNJ1
MGI_Mammalian_Phenotype_Level_4_2024	No Abnormal Phenotype Detected MP:0002169	5/1935	0.0381026	0.102212	3.11744	10.1862	PADI4;FREM1;ADAMTS9;WDR77;LTF
MGI_Mammalian_Phenotype_Level_4_2024	Abnormal Synaptic Vesicle Number MP:0004792	1/40	0.0392671	0.10369	26.9109	87.1206	KIF1A
MGI_Mammalian_Phenotype_Level_4_2024	Abnormal Circulating Amino Acid Level MP:0005311	1/44	0.0431123	0.112092	24.4027	76.7208	ATG7
MGI_Mammalian_Phenotype_Level_4_2024	Hyporesponsive To Tactile Stimuli MP:0005498	1/45	0.0440713	0.112655	23.8469	74.4487	KIF1A
MGI_Mammalian_Phenotype_Level_4_2024	Convulsive Seizures MP:0000947	1/47	0.0459865	0.112655	22.8078	70.2344	SYNJ1
MGI_Mammalian_Phenotype_Level_4_2024	Abnormal Visceral Endoderm Morphology MP:0011186	1/48	0.0469428	0.112655	22.3214	68.2772	ADAMTS9
MGI_Mammalian_Phenotype_Level_4_2024	Abnormal Embryonic Epiblast Morphology MP:0003886	1/49	0.0478981	0.112655	21.8553	66.4111	ADAMTS9
MGI_Mammalian_Phenotype_Level_4_2024	Lethality, Incomplete Penetrance MP:0010831	1/49	0.0478981	0.112655	21.8553	66.4111	PADI4
MGI_Mammalian_Phenotype_Level_4_2024	Neuron Degeneration MP:0003224	1/50	0.0488525	0.112655	21.4082	64.6301	KIF1A
MGI_Mammalian_Phenotype_Level_4_2024	Single Kidney MP:0003604	1/50	0.0488525	0.112655	21.4082	64.6301	FREM1
MGI_Mammalian_Phenotype_Level_4_2024	Decreased Apoptosis MP:0006043	1/50	0.0488525	0.112655	21.4082	64.6301	LTF
MGI_Mammalian_Phenotype_Level_4_2024	Prenatal Lethality, Incomplete Penetrance MP:0011101	2/359	0.0493501	0.112655	6.10738	18.376	KIF1A;FREM1
