# Supplementary material for: Integrative multi-omics analysis of growth plate regulation underlying body size in miniature pigs
Source: Research Square preprint supplement (doi:10.21203/rs.3.rs-7865536/v1), 2025-12-01
Supplement: Supplementary file 10 [file da48f2c624a9bcb01dda2d53.docx]

# Methods

# Phenotypes and samples

Samples from 80-day-old piglets (corresponding to 5-6-year-old children1) from litters of two miniature breeds, namely Aachen Minipig (AM) and Mini-LEWE (ML), as well as two larger pig breeds, Angeln Saddleback (AS) and Mangalitza (MA), were obtained. These piglets and their littermates were kept in the same stables, received the same food type and amount (relative to their body weight), and were measured every seven days starting shortly after birth or after weaning for three parameters, namely body height (floor to shoulder level), thickness of their metacarpal bone on the right forelimb and weight. On day 80 after birth, four piglets of each litter, two male and two female, underwent general anaesthesia by intramuscular injection of Azaperone (Stresnil, 2mg/kg; Elanco GmbH, Germany) and Ketamine (Ketamidor, 20mg/kg; Richter Pharma AG, Austria) and were euthanised by intracardial application of T61 (tetracaine hydrochloride, mebezonium iodine & embutramide cocktail, 6ml/50Kg, MSD Tiergesundheit - Intervet Deutschland GmbH, Germany). After confirmation of successful euthanasia, a piece of ear cartilage was sampled for WGS sequencing. From the right limbs, distal growth plates of the femur and humerus of each pig were fixed in Bouin’s solution to be embedded in paraffin for histological studies.

The distal growth plates of the left femur and humerus were sampled for omics analyses using 1mm disposable biopsy punches (Kai Medical, Germany). Each biopsy was punched according to a predefined order along the growth plate line, from left to right, and labelled by position, region, and planned sequencing method. The reason was to ensure that each biopsy corresponded to the analogous position and anatomical region in all sampled piglets. The designated biopsies for each omics method were flash frozen or immediately processed according to the subsequent protocols. This procedure was approved by the animal welfare officer of the University of Veterinary Medicine Hannover (“Tötungsanzeige”, ID TIHO-T-2019-12 and TIHO-T-2020-9), in accordance with national and international guidelines.

# Univariate and Multivariate Linear Mixed Models for Growth Traits

We applied the Multivariate Covariance Generalised Linear Model (McGLM) framework2 to analyse the development of piglet growth traits. McGLM enables the joint modelling of correlated responses, which in our case arise from the repeated measures structure of the data. This multivariate approach allows estimation of growth trait correlations while simultaneously accounting for covariates and within-individual dependencies.

A challenge in the analysis was the uneven data coverage. On some days, the number of available measurements was reduced due to limited access to the animals caused by maternal behaviour. Additionally, the miniature pig breeds contributed fewer observations overall. To address these limitations, we first fitted univariate linear mixed models for each trait, including day, sex, breed, and the breed-by-day interaction as fixed effects. Female sex and the AM breed were set as reference categories. The dependency structure was modelled by specifying both an independent and a compound symmetry residual component.

For the multivariate analysis, we grouped breeds by size, defining larger-sized breeds (AS, MA) and miniature breeds (AM, ML). This grouping improved coverage across days and provided a higher number of observations within each size category. To account for the increased heterogeneity introduced by this grouping, we additionally specified a random slope and a random intercept–slope interaction component. For the AS breed, which had sufficient observations, we applied the multivariate model to estimate within-breed correlations between growth traits. These estimates were then compared to the breed-adjusted correlations from the size-grouped analysis. The dependency structure was specified as described above, taking into account repeated measures and individual variation. Model performance was assessed using residual diagnostics as well as coefficients of determination (R² and adjusted R²).

All analyses were conducted in Python 3.9.6. Data wrangling and visualisation were performed with pandas v.1.5.33, NumPy v.1.23.44, matplotlib v.3.7.05, and seaborn v.0.13.26. Model fitting was carried out using the mcglm v.0.2.4 package7, a Python implementation of the multivariate covariance generalised linear model framework.

# Histological analysis

Sampled growth plates from the right humerus and femur of 16 piglets (four piglets per breed) were decalcified in EDTA solution (pH 7.2, Carl Roth, Karlsruhe, Germany) at 37°C for four weeks with daily change of the solution. Next, the samples were embedded in paraffin, sectioned to a thickness of 2-3 μm, and stained using the standard Haematoxylin and Eosin (H&E) staining protocol. The samples were scanned using the fully automated scanning system Zeiss Axio Scan Z1 (Zeiss, Oberkochen, Germany). We chose a magnification of 10 on a Plan-Apochromat numerical aperture 0.45 M27 objective, a Hitachi HV-F203SCL colour camera in 1x1 binning mode, and a 1x camera adapter. This optical setup resulted in a lateral (xy axes) pixel resolution of 0.441 µm per pixel. Each image comprised about 400-4000 million single pixels per tissue. In total, we acquired 82 tissue sections from all four pigs (16-30 per breed), of which six images were blurry and removed from further analysis.

Before further analysis, we defined the epiphyseal region of the growth plate in the long bones and cropped it accordingly. To measure and compare the thickness of the growth plates in the miniature and larger-sized pig breeds, the inherently characteristic accordion-like structure of the growth plate needed to be virtually reshaped (or reconstructed) into a linear structure. Thus, the cropped images were straightened using a macro (custom script) written for FIJI's open-source image processing software8. Within the macro, a user interface guided the experimenter in a double-masked manner through the data folders. It allowed them to draw a line, straightening the image to a line thickness of 500 pixels. Therefore, any technical (sample stretching, squeezing due to processing or sectioning) or biological (tiny curvatures) characteristics of tissues were compensated for, allowing for an objective quantification. Next, the thickness of the four central regions of the growth plates — resting, proliferative, hypertrophic, and mixed zones — was measured based on their pixel distance using five iterations of random lines in all tissues. The whole process was performed three times to ensure the randomness of the drawn lines.

# Tissue Classification

The acquired tissue images were binned to 1% of their original size by custom macros. Subsequently, within the downsampled images, we classified all pixels by an a priori trained pixel classifier to automatically identify tissue compartments and to isolate the cartilage zone of the growth plate for single-cell analysis. After the classification, we upsampled the images and fused them with their originals. Thereby, we generated a resource for the following image analysis. Briefly, a hierarchical image analysis identified the cartilage zone using a binary classification map. Within this first class, the HE-stained growth columns were identified, and herein, single nuclei were observed. We extracted colour proportions, morphometrics, localisations, and quantities from all identified objects. The described processing and analysis routines were all carried out in the ZEN 3.5 environment, utilising three modules: Intellesis, Image Analysis, and Open Application Development.

In the next step, we used a linear mixed-effects model (lmer, lmerTest package v.3.1-3 and lme4 package v. 1.1-339) to test the differences in extracted nuclei parameters among all four breeds. Next, we performed a pairwise comparison among all breeds. The obtained *p-values* were adjusted with the Bonferroni-Holm correction method.

# Whole genome sequencing data processing

Whole genome sequencing (WGS) data from a total of 109 pigs were obtained, including eight miniature pig breeds/populations and 18 larger-sized breeds. Sequencing data were retrieved from previous studies10, 11 or provided at the National Centre for Biotechnology Information (NCBI) Sequence Read Archive (SRA), as detailed in Supplementary Data 2. In addition, we performed WGS on one of our sampled AS and one of our sampled MA piglets (sequencing data for the ML and AM were already available). For these two samples, libraries were prepared using the KAPA HyperPrep Kit (Hoffmann-La Roche, Basel, Switzerland) according to the manufacturer's instructions. They were sequenced on an Illumina NovaSeq 6000 (Illumina, San Diego, CA, USA) in paired-end mode with a read length of 2 × 150 bp. These datasets were submitted to the NCBI SRA (PRJNA635602: SAMN39959578 and SAMN39959579).

All sequencing data were quality-controlled, further processed, and mapped using our WGS pipeline with parameters described in detail in our previous publication10. Processed reads were aligned to the autosomal *Sus scrofa 11.1* reference genome (Ensembl) using the Burrows-Wheeler Aligner (BWA) v. 0.7.17-r118812. Duplicate reads were flagged using Picard tools v. 3.1.013 and the final dataset was indexed.

# Runs of homozygosity analysis

## Generation of a genomic variant set for ROH detection

To detect runs of homozygosity (ROHs) for the miniature pigs of interest (AM and ML), we selected a subset of 55 pig samples from 20 populations (see Supplementary Data 2) meeting our criteria for a reliable SNP-set with sufficient variation for ROH calling: Those samples were selected, which had a sequencing coverage of 12x to 49x, for a minimum of three individuals per breed to provide statistical robustness and allow breed-specific comparisons. This selection process prioritised samples with consistent and sufficient coverage to minimise incomplete genotyping due to low sequencing depth and subsequent higher false positive rates for ROH calling. Variant calling and filtering of these data were performed according to our established ROH-detection strategy10 using the Genome Analysis Toolkit (GATK) v. 4.1.9.0 13 tools, including BaseRecalibrator, HaplotypeCaller, BaseQualityScoreRecalibrator, and CalculateGenotypePosteriors. Functional annotation of variants was performed using SNPEff v4.3 t, build 2017-11-2414. After variant calling, all variants located on mitochondrial DNA (MT), sex chromosomes (X and Y) and unplaced scaffolds were removed using vcftools v. 0.1.1515. Indels, multiallelic sites, and variants with a minor allele count of less than one or a base quality score of minQ 30, variants with read depths outside the range 6-100 or sites with more than 41 missing genotypes were removed from the analysis (-minDP 6 -maxDP 100 -max-missing-count 41).

## Runs of homozygosity detection

Based on the obtained SNP set, we called ROHs for AM and ML using the workflow established in our previous study10. This workflow integrates the rule-based method implemented in PLINK v. 1.90b6.2116 with the Hidden Markov Model (HMM)-based algorithm in RZooRoH v. 0.3.117.

To ensure accurate ROH detection, we optimised the ROH calling parameters based on the guidelines from our previous study. We applied the suggested simultaneous ROH detection using a rule- and model-based caller, as well as a subsequent merging step for ROHR 10. We employed a sliding window approach with dataset-specific adjustments based on SNP density, heterozygosity level, and sequencing depth, for the rule-based method in PLINK. Sliding window size (homozygous-window-snp) and scanning window threshold (homozygous-window-threshold) were calculated using previously validated formulae to ensure sensitivity and specificity, allowing detection of even small ROHs arising from historical recombination events dating back to the domestication of pigs approximately 10,000 years ago18.

We applied two custom parameter sets for ROH calling to maximise detection accuracy. The first parameter set (named PLINK_A, analogous to what was used in the published workflow) was designed to detect shorter ROHs with a minimum length of 20 SNPs. In this configuration, we set the minimum ROH length (homozyg-kb) to 1.2 kb, the minimum number of SNPs per ROH (homozyg-snp) to 20, the minimum SNP density (homozyg-density) to 0.06 SNPs per kb, the sliding window size (homozyg-window-snp) to 20 SNPs, and the scanning window threshold (homozyg-window-threshold) to 0.25. The second parameter set (named PLINK_B) was optimised to detect longer ROHs with a minimum length of 130 SNPs. Here, the minimum ROH length (homozyg-kb) was set to 7.8 kb, the minimum number of SNPs per ROH (homozyg-snp) to 130, the minimum SNP density (homozyg-density) to 0.06 SNPs per kb, the sliding window size (homozyg-window-snp) to 130 SNPs, and the scanning window threshold (homozyg-window-threshold) to 0.03.

Furthermore, we applied a model-based approach using the hidden Markov model (HMM) implemented in RZooRoH. Given that the domestication of pigs started about 10,000 years ago, corresponding to 5,000 pig generations with a generation interval of two years, we set the upper limit of the recombination rate (RK) to 10,000, reflecting the oldest detectable homozygous by descent (HBD) segments. We defined a mixKR model with eight predefined HMM classes, using the median RK values estimated from the KR model: 18, 28, 74, 169, 468, 1,002, 3,062 and 10,000. A genotyping error rate of 0.25% was also applied. ROHs were assigned to HBD or non-HBD regions using the Viterbi algorithm, ensuring robust classification based on recombination history.

## Runs of homozygosity region detection

Finally, overlapping ROHs for all individuals within one miniature pig breed of interest (AM or ML), as well as ROHs overlapping across both miniature pig breeds, AM and ML, were merged using a custom R script to identify ROH regions (ROHRs) for each dataset and tool as described before10. Finally, the resulting ROHRs were collected into a single file using bedtools v. 2.30.019, generating a comprehensive ROHR dataset for use in downstream analyses.

# Chromatin conformation and accessibility

## Hi-C sequencing and data analysis

We performed high-throughput chromatin conformation capture using the Hi-C technique to study genome-wide chromatin interactions within the nucleus. Bone-marrow-derived mesenchymal stem cells (MSCs) were isolated from an ML piglet from the hip area20. The library preparation method was adapted from a Hi-C protocol for eukaryotic genomes21: MSCs were detached from their culture vessel using TrypLE Express Enzyme (Gibco, Massachusetts, USA), immediately fixed in 2% formaldehyde for 10 minutes at room temperature and lysed for another 10 minutes on ice. The chromatin was cleaved using DpnII exonuclease (NEB, Ipswich, MA, USA) and sheared in a Covaris M220 (Covaris Company, Massachusetts, USA) with the following settings: peak power 30.0, duty factor 10.0, cycles/burst 200, and duration 60 seconds. Next, the library was prepared using the NEBNext Ultra II DNA Library Prep Kit for Illumina and NEBNext Multiplex Oligos for Illumina (NEB). The libraries were sequenced at 2x150 bp on an Illumina NextSeq 2000. After sequencing, the fastq files were processed, and reads were mapped to the pig reference genome Sus scrofa 11.122 using the FAN-C pipeline v.0.9.2623 with BWA v.0.7.1712. After mapping, filtering and deduplication, replicates were combined. Read pairs were then used to generate binned and KR-normalised Hi-C maps. Using a window size of 10, topologically associating domains (TADs) were detected using TopDom v.0.0.228 on 50-kb binned and KR normalised maps24.

## ATAC sequencing and peak calling

Open chromatin regions (OCRs) were identified using the Assay of Transposase Accessible Chromatin sequencing (ATAC-seq) according to a previously published protocol25: Briefly, nuclei were extracted from snap-frozen growth plate tissues in ice-cold lysis buffer containing Nonidet P40 substitute (ThermoFisher, Massachusetts, USA) as its primary lysis reagent. Genomic DNA was cleaved with Tn5 transposase (Illumina) as described in the Omni-ATAC protocol25. Cleaved DNA fragments were purified using the MiniElute PCR Purification kit (Qiagen) and indexed using Unique Dual Indexes (IDT, Iowa, USA). Libraries were amplified using NEBNext High-Fidelity 2x PCR Master Mix (NEB) and sequenced with 2x 100 bp on an Illumina NovaSeq 6000 (Supplementary Data 2).

Sequencing reads were trimmed to remove the adapter sequences using Cutadapt v.4.626 and mapped to the *Sus scrofa* reference genome using Bowtie v.2.5.027. SAMtools v.1.19.228 was used for filtering, sorting, and duplicate removal. Biological replicates from forelimb and hindlimb tissues of the same breed were pooled using SAMtools v.1.19.228. Coverage tracks for sequencing reads were generated with deepTools v.3.5.129. ATAC-seq peaks were then identified from the merged alignments using Genrich v.0.6.130.

# RNA sequencing and transcriptome profiling

The freshly sampled biopsy punches from distal growth plates from the left humerus and femur of 3 piglets per miniature pig breed AM and ML, as well as per large breed AS and ML (n=24), were incubated for 90 minutes in DMEM solution with 0.1% collagenase type A (Sigma-Aldrich, St. Louis, USA). Subsequently, RNA isolation, library preparation and sequencing were performed as previously described31. In total, 23 of 24 sampled biopsy punches had RNA integrity numbers greater than 7 and were used for library preparation. One sample from MA did not meet the quality criteria and was thereby not further processed. The prepared libraries were sequenced on an Illumina NovaSeq 6000 for 2x100 bp (Supplementary Data 2).

Quality control, data processing and the detection of counts were performed according to our previously published approach31. All 23 samples were fitted into a negative binomial generalised linear model matrix based on breed, sampling location (humerus or femur) and sex, using DESeq2 v.1.32.032. Fitted data were used to call the differentially expressed genes (DEGs), with one miniature breed (AM or ML) contrasted against one large breed (MA or AS) as a control for each test. The thresholds for selecting DEGs were set to an absolute Log2FoldChange (|L2FC|) > 2 and *p*-value < 0.05.

To investigate the abundance of exon usage and their differential patterns in each breed, we used RNA-seq mapped reads in DEXSeq v.4.50.033, as described previously20. The generalised linear model to fit exon counts, considering all four breeds under study, was formulated using the R-syntax “~ sample + exon + breed:exon”. Hence, the model accounted for repeated measures in each sample and a (breed x exon) interaction.” The threshold for selecting significant exon usage was set to padj < 0.05 and |L2FC| > 2 to consider an exon differentially used.

# Detection and prioritisation of candidate variants

## Variant calling

The complete dataset of 109 porcine whole genome sequencing data (Supplementary Data 2) was used to identify candidate variants within ROHRs. SNPs and small INDELs were detected using GATK tools, v.4.1.9.013, 34. For the detection of structural variants, we combined the calls from two tools, namely Manta v.1.6.035 and Lumpy36 via the Smoove v.0.2.8 pipeline37. Structural variants detected by Manta were further merged into a unified VCF file using SURVIVOR v.1.0.738 and subsequently re-genotyped using SVTyper v.0.7.1 39. To avoid sex bias, all tools were applied to autosomal chromosomes only. Variants larger than 1 Mb were excluded to minimise the number of false positives resulting from repetitive regions or assembly uncertainties following the initial detection process. The resulting filtered variant dataset was merged into a single file for downstream analyses.

## Genotype filtering and filtering for a variant subset

First, a subset of variants, including SNPs, INDELs, and structural variants, that overlapped with ROHRs identified in the miniature pigs (AM, ML, or both, AM+ML) was extracted. Then, this subset of variants was further filtered to retain only variants with homozygous mutant genotypes ('1/1') in the miniature pig breeds AM, ML, or both. In contrast, a wild-type genotype ('0/0') was required in all larger pig breeds, using bcftools v.1.1940. Genotypes from miniature pig breeds other than AM and ML were not restricted by genotype filtering in this analysis.

In addition, all coding homozygous variants within ROHR were annotated using ENSEMBL VEP release 11041. Variants with a SIFT score < 0.1 were further considered as potential candidate variants.

## Functional annotation of noncoding variants and gene attribution

We overlapped all filtered homozygous variants with the open chromatin regions (OCR) identified by ATAC-Seq peaks for functional annotation. Target genes were mapped to regulatory elements indicated by ATAC-seq peaks using the generalised Activity-By-Contact (gABC) model implemented in STARE v.1.0.442. Contact frequencies from Hi-C data and read counts from ATAC-seq peaks were used to predict regulatory element-target gene interactions with a gABC score > 0.02.

In the next step, the subset of variants meeting the criteria mentioned above in the filtering procedure was tested for overlap with predicted regulatory elements (ATAC peaks) and their target genes based on the gABC model. Only those variants were considered as potential noncoding candidate variants, which could be allocated by this method to a DEG in one of the miniature pig breeds (or both). In addition to that, we tested the structural variants obtained from the genotype and ROHR-filtering step for a direct overlap with DEGs of at least one bp using bcftools v.1.1940.

## Transcription factor footprinting

To further prioritise regulatory variants, we used TF-footprinting information. For this approach, peak calling for ATAC-seq data was performed on each merged alignment of the analysed pig breeds using MACS2 v.2.2.7.1 with the parameters “--nomodel --shift -100 --extsize 200 --broad”43 and Genrich v.0.6.130. The resulting peaks were merged using bedtools v.2.30.019 . Transcription factor footprints were predicted using the TOBIAS v.0.13.3 pipeline44. Only motifs corresponding to TFs with a mean normalised count (ratio of medians) gene expression value greater than ten in any of the replicates (see the transcriptome analysis) were retained for further study. Finally, the subset of variants of interest was investigated for TF binding at predicted footprint loci using SNPScan, implemented in the Java package ape v.3.0.645 . SNPs with a fold-change in binding affinity greater than five or less than 0.2 between the reference and alternative alleles were considered to have a significant effect on TF binding.

## Assigning FST-regions and noncoding variants to GWAS-genes

Independent from ROH analysis, we estimated fixation indexes (FSTs) using vcftools (v. 0.1.16) based on our SNP-dataset, called from 109 pig samples40 to investigate the genetic differentiation between miniature and larger-sized pig breeds. Filters were applied to exclude indels, enforce a minor allele frequency (MAF) threshold of 0.05, and remove sites with more than 20% missing genotypes (Max Missing = 0.8). Mitochondrial, sex and unplaced chromosomes were also excluded from the analysis.

FST values were calculated per site and using sliding windows with a window size of 50 kb and a step size of 10 kb. To determine the significance of genetic differentiation, we calculated FST thresholds based on the top 0.2% of the distribution, corresponding to weighted FST values of ≥ 0.53143 for windowed FSTs. Manhattan plots were generated using Haploview v.4.2 to visualise these results46. Genes and variants with high FST values above the threshold were identified and extracted for further analysis. The number of samples did not allow an exclusive FST analysis for both miniature pigs.

To explore the potential overlap between genes associated with 'height' identified in human GWAS studies and expressed genes from our porcine transcriptomic dataset, we retrieved all the genes related to the search term 'height' from the NHGRI-EBI GWAS Catalogue47. We relied on the GWAS Catalogue's predefined genome-wide significance threshold, which was applied during data curation. Pig orthologous genes were identified using the Ensembl BioMart tool v.2.60.148, 49, which maps human genes to their pig counterparts based on conserved gene annotations. Gene symbols, Ensembl gene IDs and cross-references to the NCBI gene database were used to ensure accurate ortholog mapping. We then screened all genes expressed in our transcriptomic dataset for overlap with porcine orthologs identified in the GWAS catalogue. Genes were considered to be expressed if the sum of their normalised raw counts was greater than one across all biological replicates.

# Mass Spectrometry-based proteomics

Flash-frozen samples of growth plates from the left humerus, in triplicate, were immersed in cold lysis buffer (Tris-HCl 50 mM, NaCl 150 mM, 1% NP-40, 0.5% Sodium deoxycholate, 1% SDS, and Protease Inhibitor Mix 1%), homogenised in a pre-cooled SpeedMill, and immediately centrifuged at 4°C*.* The samples were left on ice for 30 minutes before they were centrifuged at 4°C. An aliquot from the supernatant (lysate) was taken for measuring the protein concentration using a BCA assay. 20 μg of protein were taken from the lysate for precipitation in ice-cold acetone (final concentration of 80 %). Proteins were spun down at 11,000 x*g* and 4 °C for 15 min, reduced, alkylated andand digested with Trypsin Gold (Promega) following the manufacturer’s instructions. Next, samples were purified using StageTips following the protocol of Rappsilber et al.50. Purified peptides were dried in a SpeedVac Vacuum Concentrator and resuspended in MS buffer (0.1 % formic acid, 5 % acetonitrile in water (MS grade).

Next, samples were analysed via liquid chromatography–mass spectrometry using a Vanquish Neo nanoflow UHPLC System coupled to an Orbitrap Eclipse mass spectrometer (Thermo Scientific) as previously described51. In brief, 500 ng peptides were separated on a reversed phase nanoViper™ PepMap™ column with a gradient of buffer A (0% ACN, 0.1% FA) and B (80% ACN, 0.1% FA). Peptides were ionised with a Nano Spray Flex Ion Source and stainless-steel emitters. Precursor scans were performed in the Orbitrap mass analyser. 20 most intensive precursors were submitted to HCD fragmentation and fragments were scanned in the linear ion trap.

MS raw data were processed using MaxQuant software (version 2.4.14.0) for the identification and quantification of proteins, employing preconfigured settings. Additionally, label-free quantification via LFQ and IBAQ was selected, and mzTab tables were written51. MS spectra were searched against the UniProt database of porcine proteins (ID: UP000008227, all entries, downloaded on 21 June 2024).

## Network propagation with protein-protein interactions

To integrate the transcriptomics and proteomics data for each pairwise comparison of miniature and larger pigs and to map the data onto networks, we applied a workflow based on three steps: i) network generation, ii) node initialisation, and iii) network propagation.

For *network generation*, we utilised an integrated, high-quality human protein-protein interaction (PPI) network provided by the ConsensusPathDB resource52, which was compiled from 18 different public repositories. PPIs were evaluated with a quality score that is composed of annotation-based and topology-based measures to quantify the confidence associated with each given interaction (range [0,1]). For our study, we retained only interactions with a confidence score greater than 0.95, resulting in a PPI network comprising 10,534 proteins and 137,447 interactions.

For *node initialisation*, we computed for each pig gene, *gi,* a combined transcriptomics and proteomics relevance score by

where and are the scores from the RNA-seq and proteomics data analysis for each pairwise comparison:

Here, and are the P-values computed for gene/protein *gi* in the comparison of miniature and larger pigs with transcriptomics and proteomics data, respectively, and and are the corresponding fold-changes. P-values and fold-changes were computed with DESeq2 and with an unpaired Welch t-test. Network nodes were initialised with the relevance scores of their homologous pig genes using the UniProt annotation UP000008227, if both measurements for transcriptomics and proteomics were available (ca. 2,400 genes/proteins). All other network nodes were set to zero.

For *network propagation*, to derive network modules that aggregate most of the relevance associated with the observed differences between small and large pigs, the weights of the initialised nodes were distributed across the network using the NetCore program53, which employs the novel concept of node coreness. After the re-ranking process, nodes were compared against random graph permutations to identify nodes that were significantly re-ranked. Then, significantly re-ranked nodes were connected with the top-scored nodes, and the derived connected components built the final network modules. The entire workflow was applied to four comparisons involving miniature and larger pigs (AMvsAS, AMvsMA, MLvsAS, and MLvsMA), resulting in four distinct sets of network modules.

## Gene-set enrichment and functional analysis

Functional annotation and gene-set enrichment analysis were performed separately on different data sets using the enrichR tool (R package, version 3.454, 55) for the “KEGG_Human_2021”, “Reactome_Pathway 2024”, and “MGI_Mammalian_Phenotype_Level_4_2024” databases. The first gene set consisted of a list of genes assigned to both coding and noncoding variants in each of the miniature pig breeds. The second set analysis was performed on the gene list obtained from DEGs and protein-protein interaction networks. The output results were filtered for *p*-value < 0.05. The significant terms among all the different datasets were checked for overlapping terms.

# References

1. Tohyama S, Kobayashi E. Age-Appropriateness of Porcine Models Used for Cell Transplantation. *Cell Transplant* **28**, 224–228 (2019).

2. Bonat WH, Jorgensen B. Multivariate covariance generalized linear models. *J Roy Stat Soc C* **65**, 649–675 (2016).

3. McKinney W. pandas: a foundational Python library for data analysis and statistics. *Python for high performance and scientific computing* **14**, 1–9 (2011).

4. Harris CR*, et al.* Array programming with NumPy. *Nature* **585**, 357–362 (2020).

5. Hunter JD. Matplotlib: A 2D graphics environment. *Comput Sci Eng* **9**, 90–95 (2007).

6. Waskom ML. seaborn: statistical data visualization. *Journal of Open Source Software* **6**, (2021).

7. Maia JCF, Bonat WH. Multivariate Covariance Generalized Linear Models in Python: The mcglm library. *Journal of Open Source Software* **9**, 6037 (2024).

8. Schneider CA, Rasband WS, Eliceiri KW. NIH Image to ImageJ: 25 years of image analysis. *Nat Methods* **9**, 671–675 (2012).

9. Bates D, Mächler M, Bolker BM, Walker SC. Fitting Linear Mixed-Effects Models Using lme4. *J Stat Softw* **67**, 1–48 (2015).

10. Berghofer J, Khaveh N, Mundlos S, Metzger J. Simultaneous testing of rule- and model-based approaches for runs of homozygosity detection opens up a window into genomic footprints of selection in pigs. *BMC Genomics* **23**, 564 (2022).

11. Berghofer J, Khaveh N, Mundlos S, Metzger J. Multi-tool copy number detection highlights common body size-associated variants in miniature pig breeds from different geographical regions. *BMC Genomics* **26**, 285 (2025).

12. Li H, Durbin R. Fast and accurate long-read alignment with Burrows-Wheeler transform. *Bioinformatics* **26**, 589–595 (2010).

13. McKenna A*, et al.* The Genome Analysis Toolkit: a MapReduce framework for analyzing next-generation DNA sequencing data. *Genome Res* **20**, 1297–1303 (2010).

14. Cingolani P*, et al.* A program for annotating and predicting the effects of single nucleotide polymorphisms, SnpEff: SNPs in the genome of Drosophila melanogaster strain w1118; iso-2; iso-3. *Fly (Austin)* **6**, 80–92 (2012).

15. Danecek P*, et al.* The variant call format and VCFtools. *Bioinformatics* **27**, 2156–2158 (2011).

16. Chang CC, Chow CC, Tellier LC, Vattikuti S, Purcell SM, Lee JJ. Second-generation PLINK: rising to the challenge of larger and richer datasets. *Gigascience* **4**, 7 (2015).

17. Bertrand AR, Kadri NK, Flori L, Gautier M, Druet T. RZooRoH: An R package to characterize individual genomic autozygosity and identify homozygous-by-descent segments. *Methods Ecol Evol* **10**, 860–866 (2019).

18. Groenen MAM. A decade of pig genome sequencing: a window on pig domestication and evolution. *Genetics Selection Evolution* **48**, (2016).

19. Quinlan AR. BEDTools: The Swiss-Army Tool for Genome Feature Analysis. *Curr Protoc Bioinformatics* **47**, 11 12 11–34 (2014).

20. Khaveh N, Buschow R, Metzger J. Deciphering transcriptome patterns in porcine mesenchymal stem cells promoting phenotypic maintenance and differentiation by key driver genes. *Front Cell Dev Biol* **12**, 1478757 (2024).

21. Diaz N*, et al.* Chromatin conformation analysis of primary patient tissue using a low input Hi-C method. *Nat Commun* **9**, 4938 (2018).

22. Warr A*, et al.* An improved pig reference genome sequence to enable pig genetics and genomics research. *Gigascience* **9**, (2020).

23. Kruse K, Hug CB, Vaquerizas JM. FAN-C: a feature-rich framework for the analysis and visualisation of chromosome conformation capture data. *Genome Biol* **21**, 303 (2020).

24. Shin H*, et al.* TopDom: an efficient and deterministic method for identifying topological domains in genomes. *Nucleic Acids Res* **44**, e70 (2016).

25. Corces MR*, et al.* An improved ATAC-seq protocol reduces background and enables interrogation of frozen tissues. *Nat Methods* **14**, 959–962 (2017).

26. Martin M. Cutadapt removes adapter sequences from high-throughput sequencing reads. *EMBnetjournal* **17**, 10–12 (2011).

27. Langmead B, Salzberg SL. Fast gapped-read alignment with Bowtie 2. *Nat Methods* **9**, 357–359 (2012).

28. Li H*, et al.* The Sequence Alignment/Map format and SAMtools. *Bioinformatics* **25**, 2078–2079 (2009).

29. Ramirez F*, et al.* deepTools2: a next generation web server for deep-sequencing data analysis. *Nucleic Acids Res* **44**, W160–165 (2016).

30. Gaspar MJ. Genrich: detecting sites of genomic enrichment.). 0.6.1 edn (2018).

31. Khaveh N, Schachler K, Berghöfer J, Jung K, Metzger J. Altered hair root gene expression profiles highlight calcium signaling and lipid metabolism pathways to be associated with curly hair initiation and maintenance in Mangalitza pigs. *Frontiers in Genetics* **14**, (2023).

32. Love MI, Huber W, Anders S. Moderated estimation of fold change and dispersion for RNA-seq data with DESeq2. *Genome Biol* **15**, 550 (2014).

33. Anders S, Reyes A, Huber W. Detecting differential usage of exons from RNA-seq data. *Genome Res* **22**, 2008–2017 (2012).

34. van der Auwera G, O'Connor BD. *Genomics in the Cloud: Using Docker, GATK, and WDL in Terra*. O'Reilly Media, Incorporated (2020).

35. Chen XY*, et al.* Manta: rapid detection of structural variants and indels for germline and cancer sequencing applications. *Bioinformatics* **32**, 1220–1222 (2016).

36. Layer RM, Chiang C, Quinlan AR, Hall IM. LUMPY: a probabilistic framework for structural variant discovery. *Genome Biology* **15**, (2014).

37. Pedersen BS, Layer R, Quilan AR. smoove: structural-variant calling and genotyping with existing tools.). 0.2.8 edn (2020).

38. Jeffares DC*, et al.* Transient structural variations have strong effects on quantitative traits and reproductive isolation in fission yeast. *Nat Commun* **8**, 14061 (2017).

39. Chiang C*, et al.* SpeedSeq: ultra-fast personal genome analysis and interpretation. *Nat Methods* **12**, 966–968 (2015).

40. Danecek P*, et al.* Twelve years of SAMtools and BCFtools. *Gigascience* **10**, (2021).

41. McLaren W*, et al.* The Ensembl Variant Effect Predictor. *Genome Biol* **17**, 122 (2016).

42. Hecker D, Behjati Ardakani F, Karollus A, Gagneur J, Schulz MH. The adapted Activity-By-Contact model for enhancer-gene assignment and its application to single-cell data. *Bioinformatics* **39**, (2023).

43. Zhang Y*, et al.* Model-based analysis of ChIP-Seq (MACS). *Genome Biol* **9**, R137 (2008).

44. Bentsen M*, et al.* ATAC-seq footprinting unravels kinetics of transcription factor binding during zygotic genome activation. *Nat Commun* **11**, 4267 (2020).

45. Vorontsov IE, Kulakovskiy IV, Khimulya G, Nikolaeva DD, Makeev VJ. PERFECTOS-APE – predicting regulatory functional effect of SNPs by approximate P-value estimation.) (2015).

46. Barrett JC, Fry B, Maller J, Daly MJ. Haploview: analysis and visualization of LD and haplotype maps. *Bioinformatics* **21**, 263–265 (2005).

47. Buniello A*, et al.* The NHGRI-EBI GWAS Catalog of published genome-wide association studies, targeted arrays and summary statistics 2019. *Nucleic Acids Res* **47**, D1005–D1012 (2019).

48. Durinck S*, et al.* BioMart and Bioconductor: a powerful link between biological databases and microarray data analysis. *Bioinformatics* **21**, 3439–3440 (2005).

49. Lawrence M*, et al.* Software for Computing and Annotating Genomic Ranges. *Plos Comput Biol* **9**, (2013).

50. Rappsilber J, Mann M, Ishihama Y. Protocol for micro-purification, enrichment, pre-fractionation and storage of peptides for proteomics using StageTips. *Nat Protoc* **2**, 1896–1906 (2007).

51. Tyanova S, Temu T, Cox J. The MaxQuant computational platform for mass spectrometry-based shotgun proteomics. *Nat Protoc* **11**, 2301–2319 (2016).

52. Kamburov A, Herwig R. ConsensusPathDB 2022: molecular interactions update as a resource for network biology. *Nucleic Acids Res* **50**, D587–D595 (2022).

53. Barel G, Herwig R. NetCore: a network propagation approach using node coreness. *Nucleic Acids Res* **48**, e98 (2020).

54. Chen EY*, et al.* Enrichr: interactive and collaborative HTML5 gene list enrichment analysis tool. *BMC Bioinformatics* **14**, 128 (2013).

55. Kuleshov MV*, et al.* Enrichr: a comprehensive gene set enrichment analysis web server 2016 update. *Nucleic Acids Res* **44**, W90–97 (2016).
